# Supplementary material for: Complex regulation of Gephyrin splicing is a determinant of inhibitory postsynaptic diversity
Source: Nat Commun. 2022 Jun 18;13:3507. doi: 10.1038/s41467-022-31264-w (PMC9206673; doi:10.1038/s41467-022-31264-w)
Supplement: Supplementary file 6 — Supplementary Table 4 [file 41467_2022_31264_MOESM6_ESM.xlsx]

## Sheet: TIS detected in Ribo-seq
		TIS identified using ORF finder			Ribo-seq (Fields AP et al., Mol Cell 2015)
			TIS +12 nts
		1	ATGGCGACCGAGGGA
		2	CTGCAGCAGCTCTTG					Sequence found
		3	ATGTCTCCTTTTCCC
		4	TTGTCCAACACCAAA
		5	TTGTCCAAGATCCTT
		6	TTGGGTGGGACTATA
		7	CTGGTAGCAAGAAAG
		8	ATGGCCCTGGCAATG
		9	CTGATAATTAACCTA
		10	ATGCCAGGACAAGTG
		11	ATGGCAAATCATGGG
		12	CTGGAGGAACGGGGT
		13	CTGCTAAATCCTGAA
		14	ATGTCACACCTCTGG
		15	CTGCTTCAGGAATCT
		16	CTGCTAAATCCTGAA
		17	TTGGTACAGAAATCA
		18	CTGGACATTGATCTT
		19	ATGGCTATGCTGTTC
		20	CTGCCAGCTCTACCT
		21	CTGGTGCAAGCTCGG
		22	TTGAAGATACTGAAC
		23	TTGTTGGGTGGGACT
		24	TTGGAAGGGCTTAAA
		25	TTGGCCAAAGGAACC
		26	ATGGGAGCAAAGTTT
		27	TTGCTCCATGACATT
		28	ATGCTGGCTCGTGCC
		29	ATGAGTGATAGCTGC
		30	ATGAGGGTATCAGCC
		31	TTGCCAACAACATTT

## Sheet: ORF finder
		AA_length	mol_weight	Id matching	E40 splicing	TIS	CDS	AAseq	info	DUP
GPHN_1	ORF1	736	79.76	GPHN	E40	ATGGCGACCGAGGGA	ATGGCGACCGAGGGAATGATCCTCACCAACCACGACCATCAAATCCGTGTCGGAGTCCTCACAGTGAGTGATAGCTGCTTCAGGAATCTTGCAGAAGACCGCAGTGGGATAAATCTAAAAGATCTTGTCCAAGATCCTTCTTTGTTGGGTGGGACTATATCGGCATACAAGATAGTACCAGATGAAATAGAAGAAATCAAGGAAACACTCATAGACTGGTGTGATGAAAAGGAACTTAATTTAATATTAACAACTGGAGGAACGGGGTTTGCACCACGAGATGTCACTCCAGAGGCCACAAAAGAAGTAATAGAGCGGGAAGCGCCAGGGATGGCCCTGGCAATGCTGATGGGATCGCTCAATGTCACACCTCTGGGCATGCTCTCTAGACCAGTGTGT…	MATEGMILTNHDHQIRVGVLTVSDSCFRNLAEDRSGINLKDLVQDPSLLGGTISAYKIVPDEIEEIKETLIDWCDEKELNLILTTGGTGFAPRDVTPEATKEVIEREAPGMALAMLMGSLNVTPLGMLSRPVCGIRGKTLIINLPGSKKGSQECFQFILPALPHAIDLLRDAIVKVKEVHDELEDLPSPPPPLSPPPTTSPHKQTEDKGVQCEEEEEEKKDSGVASTEDSSSSHITAAALAAKIPDSIISRGVQVLPRDTASLSTTPSESPRAQATSRLSTASCPTPKVQSRCSSKENILRASHSAVDITKVARRHRMSPFPLTSMDKAFITVLEMTPVLGTEIINYRDGMGRVLAQDVYAKDNLPPFPASVKDGYAVRAADGPGDRFIIGESQAGEQP…	lcl|GPHN_1:8-2218_ORF1_GPHN_1:7:2217	['GPHN_1_ORF1']
GPHN_2	ORF1	645	69.95	GPHN	E40	ATGGCGACCGAGGGA	ATGGCGACCGAGGGAATGATCCTCACCAACCACGACCATCAAATCCGTGTCGGAGTCCTCACAGTGAGTGATAGCTGCTTCAGGAATCTTGCAGAAGACCGCAGTGGGATAAATCTAAAAGATCTTGTCCAAGATCCTTCTTTGTTGGGTGGGACTATATCGGCATACAAGATAGTACCAGATGAAATAGAAGAAATCAAGGAAACACTCATAGACTGGTGTGATGAAAAGGAACTTAATTTAATATTAACAACTGGAGGAACGGGGTTTGCACCACGAGATGTCACTCCAGAGGCCACAAAAGAAGTAATAGAGCGGGAAGCGCCAGGGATGGCCCTGGCAATGCTGATGGGATCGCTCAATGTCACACCTCTGGGCATGCTCTCTAGACCAGTGTGT…	MATEGMILTNHDHQIRVGVLTVSDSCFRNLAEDRSGINLKDLVQDPSLLGGTISAYKIVPDEIEEIKETLIDWCDEKELNLILTTGGTGFAPRDVTPEATKEVIEREAPGMALAMLMGSLNVTPLGMLSRPVCGIRGKTLIINLPGSKKGSQIPDSIISRGVQVLPRDTASLSTTPSESPRAQATSRLSTASCPTPKVQSRCSSKENILRASHSAVDITKVARRHRMSPFPLTSMDKAFITVLEMTPVLGTEIINYRDGMGRVLAQDVYAKDNLPPFPASVKDGYAVRAADGPGDRFIIGESQAGEQPTQTVMPGQVMRVTTGAPIPCGADAVVQVEDTELIRESDDGTEELEVRILVQARPGQDIRPIGHDIKRGECVLAKGTHMGPSEIGLLATVGV…	lcl|GPHN_2:8-1945_ORF1_GPHN_2:7:1944	['GPHN_2_ORF1']
GPHN_3	ORF1	749	81.21	GPHN	E40	ATGGCGACCGAGGGA	ATGGCGACCGAGGGAATGATCCTCACCAACCACGACCATCAAATCCGTGTCGGAGTCCTCACAGTGAGTGATAGCTGCTTCAGGAATCTTGCAGAAGACCGCAGTGGGATAAATCTAAAAGATCTTGTCCAAGATCCTTCTTTGTTGGGTGGGACTATATCGGCATACAAGATAGTACCAGATGAAATAGAAGAAATCAAGGAAACACTCATAGACTGGTGTGATGAAAAGGAACTTAATTTAATATTAACAACTGGAGGAACGGGGTTTGCACCACGAGATGTCACTCCAGAGAAATTCCCAACATTCCCATTTTGTGGGCTCCAGAAAGGGGCCACAAAAGAAGTAATAGAGCGGGAAGCGCCAGGGATGGCCCTGGCAATGCTGATGGGATCGCTC…	MATEGMILTNHDHQIRVGVLTVSDSCFRNLAEDRSGINLKDLVQDPSLLGGTISAYKIVPDEIEEIKETLIDWCDEKELNLILTTGGTGFAPRDVTPEKFPTFPFCGLQKGATKEVIEREAPGMALAMLMGSLNVTPLGMLSRPVCGIRGKTLIINLPGSKKGSQECFQFILPALPHAIDLLRDAIVKVKEVHDELEDLPSPPPPLSPPPTTSPHKQTEDKGVQCEEEEEEKKDSGVASTEDSSSSHITAAALAAKIPDSIISRGVQVLPRDTASLSTTPSESPRAQATSRLSTASCPTPKVQSRCSSKENILRASHSAVDITKVARRHRMSPFPLTSMDKAFITVLEMTPVLGTEIINYRDGMGRVLAQDVYAKDNLPPFPASVKDGYAVRAADGPGD…	lcl|GPHN_3:8-2257_ORF1_GPHN_3:7:2256	['GPHN_3_ORF1']
GPHN_4	ORF1	772	83.68	GPHN	E40	ATGGCGACCGAGGGA	ATGGCGACCGAGGGAATGATCCTCACCAACCACGACCATCAAATCCGTGTCGGAGTCCTCACAGTGAGTGATAGCTGCTTCAGGAATCTTGCAGAAGACCGCAGTGGGATAAATCTAAAAGATCTTGTCCAAGATCCTTCTTTGTTGGGTGGGACTATATCGGCATACAAGATAGTACCAGATGAAATAGAAGAAATCAAGGAAACACTCATAGACTGGTGTGATGAAAAGGAACTTAATTTAATATTAACAACTGGAGGAACGGGGTTTGCACCACGAGATGTCACTCCAGAGGCCACAAAAGAAGTAATAGAGCGGGAAGCGCCAGGGATGGCCCTGGCAATGCTGATGGGATCGCTCAATGTCACACCTCTGGGCATGCTCTCTAGACCAGTGTGT…	MATEGMILTNHDHQIRVGVLTVSDSCFRNLAEDRSGINLKDLVQDPSLLGGTISAYKIVPDEIEEIKETLIDWCDEKELNLILTTGGTGFAPRDVTPEATKEVIEREAPGMALAMLMGSLNVTPLGMLSRPVCGIRGKTLIINLPGSKKGSQECFQFILPALPHAIDLLRDAIVKVKEVHDELEDLPSPPPPLSPPPTTSPHKQTEDKGVQCEEEEEEKKDSGVASTEDSSSSHITAAALAAKKHPFYTSPALFMANHGQPIPGLISYSHHATGSADKRIPDSIISRGVQVLPRDTASLSTTPSESPRAQATSRLSTASCPTPKVQSRCSSKENILRASHSAVDITKVARRHRMSPFPLTSMDKAFITVLEMTPVLGTEIINYRDGMGRVLAQDVYAKD…	lcl|GPHN_4:8-2326_ORF1_GPHN_4:7:2325	['GPHN_4_ORF1']
	ORF2	100	11.18	unknown	PTC	CTGCAGCAGCTCTTG	CTGCAGCAGCTCTTGCTGCAAAGAAGCATCCATTCTACACCAGTCCTGCTCTTTTCATGGCAAATCATGGGCAGCCCATCCCTGGTCTCATCAGTTATTCCCATCATGCAACAGGCAGTGCAGATAAACGGATTCCAGACTCCATCATTTCTCGTGGTGTTCAGGTGCTCCCACGAGACACAGCCTCCCTTAGCACTACTCCTTCAGAATCGCCCCGTGCTCAGGCTACATCTCGCCTCTCTACAGCTTCTTGTCCAACACCAAAAGTCCAGTCCAGGTGCAGCAGCAAGGAGAACATTCTAA	MQQLLLQRSIHSTPVLLFSWQIMGSPSLVSSVIPIMQQAVQINGFQTPSFLVVFRCSHETQPPLALLLQNRPVLRLHLASLQLLVQHQKSSPGAAARRTF	lcl|GPHN_4:714-1016_ORF2_GPHN_4:713:1015	['GPHN_105_ORF2', 'GPHN_116_ORF1', 'GPHN_119_ORF1', 'GPHN_143_ORF2', 'GPHN_144_ORF2', 'GPHN_164_ORF1', 'GPHN_171_ORF2', 'GPHN_185_ORF2', 'GPHN_190_ORF2', 'GPHN_241_ORF2', 'GPHN_254_ORF2', 'GPHN_38_ORF2', 'GPHN_4_ORF2', 'GPHN_51_ORF2', 'GPHN_57_ORF2', 'GPHN_77_ORF2', 'GPHN_95_ORF1']
GPHN_5	ORF1	455	49.62	GPHN	E40	ATGGCGACCGAGGGA	ATGGCGACCGAGGGAATGATCCTCACCAACCACGACCATCAAATCCGTGTCGGAGTCCTCACAGGTCACAGTGCTGTAGATATCACCAAGGTGGCTAGAAGACATCGCATGTCTCCTTTTCCCCTGACGTCTATGGACAAAGCCTTCATTACAGTCCTGGAGATGACTCCGGTGCTTGGTACAGAAATCATCAATTACCGAGATGGAATGGGGCGAGTCCTTGCTCAAGATGTATATGCAAAAGACAACCTACCCCCATTCCCTGCATCAGTAAAAGATGGCTATGCTGTTCGAGCTGCTGATGGTCCAGGGGATCGTTTCATCATTGGGGAATCCCAAGCTGGTGAGCAGCCAACTCAGACAGTAATGCCAGGACAAGTGATGCGGGTTACAACAGGT…	MATEGMILTNHDHQIRVGVLTGHSAVDITKVARRHRMSPFPLTSMDKAFITVLEMTPVLGTEIINYRDGMGRVLAQDVYAKDNLPPFPASVKDGYAVRAADGPGDRFIIGESQAGEQPTQTVMPGQVMRVTTGAPIPCGADAVVQVEDTELIRESDDGTEELEVRILVQARPGQDIRPIGHDIKRGECVLAKGTHMGPSEIGLLATVGVTEVEVNKFPVVAVMSTGNELLNPEDDLLPGKIRDSNRSTLLATIQEHGYPTINLGIVGDNPDDLLNALNEGISRADVIITSGGVSMGEKDYLKQVLDIDLHAQIHFGRVFMKPGLPTTFATLDIDGVRKIIFALPGNPVSAVVTCNLFVVPALRKMQGILDPRPTIIKARLSCDVKLDPRPEYHRCILTW…	lcl|GPHN_5:8-1375_ORF1_GPHN_5:7:1374	['GPHN_5_ORF1']
GPHN_6	ORF1	769	83.48	GPHN	E40	ATGGCGACCGAGGGA	ATGGCGACCGAGGGAATGATCCTCACCAACCACGACCATCAAATCCGTGTCGGAGTCCTCACAGTGAGTGATAGCTGCTTCAGGAATCTTGCAGAAGACCGCAGTGGGATAAATCTAAAAGATCTTGTCCAAGATCCTTCTTTGTTGGGTGGGACTATATCGGCATACAAGATAGTACCAGATGAAATAGAAGAAATCAAGGAAACACTCATAGACTGGTGTGATGAAAAGGAACTTAATTTAATATTAACAACTGGAGGAACGGGGTTTGCACCACGAGATGTCACTCCAGAGGCCACAAAAGAAGTAATAGAGCGGGAAGCGCCAGGGATGGCCCTGGCAATGCTGATGGGATCGCTCAATGTCACACCTCTGGGCATGCTCTCTAGACCAGTGTGT…	MATEGMILTNHDHQIRVGVLTVSDSCFRNLAEDRSGINLKDLVQDPSLLGGTISAYKIVPDEIEEIKETLIDWCDEKELNLILTTGGTGFAPRDVTPEATKEVIEREAPGMALAMLMGSLNVTPLGMLSRPVCGIRGKTLIINLPGSKKGSQECFQFILPALPHAIDLLRDAIVKVKEVHDELEDLPSPPPPLSPPPTTSPHKQTEDKGVQCEEEEEEKKDSGVASTEDSSSSHITAAALAAKIPDSIISRGVQVLPRDTASLSTTPSESPRAQATSRLSTASCPTPKQIRRPDESKGVASRVGSLKYLLSLGDFVHKTFKVQSRCSSKENILRASHSAVDITKVARRHRMSPFPLTSMDKAFITVLEMTPVLGTEIINYRDGMGRVLAQDVYAKDNLP…	lcl|GPHN_6:8-2317_ORF1_GPHN_6:7:2316	['GPHN_6_ORF1']
GPHN_7	ORF1	409	44.43	GPHN	E40	ATGGCGACCGAGGGA	ATGGCGACCGAGGGAATGATCCTCACCAACCACGACCATCAAATCCGTGTCGGAGTCCTCACAGATGGAATGGGGCGAGTCCTTGCTCAAGATGTATATGCAAAAGACAACCTACCCCCATTCCCTGCATCAGTAAAAGATGGCTATGCTGTTCGAGCTGCTGATGGTCCAGGGGATCGTTTCATCATTGGGGAATCCCAAGCTGGTGAGCAGCCAACTCAGACAGTAATGCCAGGACAAGTGATGCGGGTTACAACAGGTGCTCCAATCCCCTGCGGTGCTGATGCAGTAGTGCAAGTTGAAGATACTGAACTCATCAGGGAATCAGATGATGGTACTGAAGAACTTGAAGTACGAATTCTGGTGCAAGCTCGGCCAGGCCAAGATATCCGACCCATC…	MATEGMILTNHDHQIRVGVLTDGMGRVLAQDVYAKDNLPPFPASVKDGYAVRAADGPGDRFIIGESQAGEQPTQTVMPGQVMRVTTGAPIPCGADAVVQVEDTELIRESDDGTEELEVRILVQARPGQDIRPIGHDIKRGECVLAKGTHMGPSEIGLLATVGVTEVEVNKFPVVAVMSTGNELLNPEDDLLPGKIRDSNRSTLLATIQEHGYPTINLGIVGDNPDDLLNALNEGISRADVIITSGGVSMGEKDYLKQVLDIDLHAQIHFGRVFMKPGLPTTFATLDIDGVRKIIFALPGNPVSAVVTCNLFVVPALRKMQGILDPRPTIIKARLSCDVKLDPRPEYHRCILTWHHQEPLPWAQSTGNQMSSRLMSMRSANGLLMLPPKTEQYVELHKGE…	lcl|GPHN_7:8-1237_ORF1_GPHN_7:7:1236	['GPHN_7_ORF1']
GPHN_8	ORF1	757	82.37	GPHN	E40	ATGGCGACCGAGGGA	ATGGCGACCGAGGGAATGATCCTCACCAACCACGACCATCAAATCCGTGTCGGAGTCCTCACAGTGAGTGATAGCTGCTTCAGGAATCTTGCAGAAGACCGCAGTGGGATAAATCTAAAAGATCTTGTCCAAGATCCTTCTTTGTTGGGTGGGACTATATCGGCATACAAGATAGTACCAGATGAAATAGAAGAAATCAAGGAAACACTCATAGACTGGTGTGATGAAAAGGAACTTAATTTAATATTAACAACTGGAGGAACGGGGTTTGCACCACGAGATGTCACTCCAGAGGCCACAAAAGAAGTAATAGAGCGGGAAGCGCCAGGGATGGCCCTGGCAATGCTGATGGGATCGCTCAATGTCACACCTCTGGGCATGCTCTCTAGACCAGTGTGT…	MATEGMILTNHDHQIRVGVLTVSDSCFRNLAEDRSGINLKDLVQDPSLLGGTISAYKIVPDEIEEIKETLIDWCDEKELNLILTTGGTGFAPRDVTPEATKEVIEREAPGMALAMLMGSLNVTPLGMLSRPVCGIRGKTLIINLPGSKKGSQECFQFILPALPHAIDLLRDAIVKVKEVHDELEDLPSPPPPLSPPPTTSPHKQTEDKGVQCEEEEEEKKDSGVASTEDSSSSHITAAALAAKIPDSIISRGVQVLPRDTASLSTTPSESPRAQATSRLSTASCPTPKLHSRLEGLKDELWRNRGYDLRVQSRCSSKENILRASHSAVDITKVARRHRMSPFPLTSMDKAFITVLEMTPVLGTEIINYRDGMGRVLAQDVYAKDNLPPFPASVKDGYAV…	lcl|GPHN_8:8-2281_ORF1_GPHN_8:7:2280	['GPHN_8_ORF1']
GPHN_9	ORF1	750	81.23	GPHN	E40	ATGGCGACCGAGGGA	ATGGCGACCGAGGGAATGATCCTCACCAACCACGACCATCAAATCCGTGTCGGAGTCCTCACAGTGAGTGATAGCTGCTTCAGGAATCTTGCAGAAGACCGCAGTGGGATAAATCTAAAAGATCTTGTCCAAGATCCTTCTTTGTTGGGTGGGACTATATCGGCATACAAGATAGTACCAGATGAAATAGAAGAAATCAAGGAAACACTCATAGACTGGTGTGATGAAAAGGAACTTAATTTAATATTAACAACTGGAGGAACGGGGTTTGCACCACGAGATGTCACTCCAGAGGCCACAAAAGAAGTAATAGAGCGGGAAGCGCCAGGGATGGCCCTGGCAATGCTGATGGGATCGCTCAATGTCACACCTCTGGGCATGCTCTCTAGACCAGTGTGT…	MATEGMILTNHDHQIRVGVLTVSDSCFRNLAEDRSGINLKDLVQDPSLLGGTISAYKIVPDEIEEIKETLIDWCDEKELNLILTTGGTGFAPRDVTPEATKEVIEREAPGMALAMLMGSLNVTPLGMLSRPVCGIRGKTLIINLPGSKKGSQECFQFILPALPHAIDLLRDAIVKVKEVHDELEDLPSPPPPLSPPPTTSPHKQTEDKGVQCEEEEEEKKDSGVASTEDSSSSHITAAALAAKIPDSIISRGVQVLPRDTASLSTTPSESPRAQATSRLSTASCPTPKARLPSCSSTYSVSEVQSRCSSKENILRASHSAVDITKVARRHRMSPFPLTSMDKAFITVLEMTPVLGTEIINYRDGMGRVLAQDVYAKDNLPPFPASVKDGYAVRAADGPG…	lcl|GPHN_9:8-2260_ORF1_GPHN_9:7:2259	['GPHN_9_ORF1']
GPHN_10	ORF1	515	55.99	GPHN	E40	ATGGCGACCGAGGGA	ATGGCGACCGAGGGAATGATCCTCACCAACCACGACCATCAAATCCGTGTCGGAGTCCTCACAGTGAGTGATAGCTGCTTCAGGAATCTTGCAGAAGACCGCAGTGGGATAAATCTAAAAGATCTTGTCCAAGATCCTTCTTTGTTGGGTGGGACTATATCGGCATACAAGATAGTACCAGATGAAATAGAAGAAATCAAGGAAACACTCATAGACTGGTGTGATGAAAAGGAACTTAATTTAATATTAACAACTGGAGGAACGGGGTTTGCACCACGAGATGTCACTCCAGAGGCCACAAAAGAAGTAATAGAGCGGGAAGCGCCAGGGATGGCCCTGGCAATGCTGATGGGATCGCTCAATGTCACACCTCTGGGCATGCTCTCTAGACCAGTGTGT…	MATEGMILTNHDHQIRVGVLTVSDSCFRNLAEDRSGINLKDLVQDPSLLGGTISAYKIVPDEIEEIKETLIDWCDEKELNLILTTGGTGFAPRDVTPEATKEVIEREAPGMALAMLMGSLNVTPLGMLSRPVCGIRGKTLIINLPGSKKGSQECFQFILPALPHAIDLLRDAIVKVKEVHDELEDLPSPPPPLSPPPTTSPHKQTEDKGVQCEEEEEEKKDSGVASTEDSSSSHITAAALAAKIPDSIISRGVQVLPRDTASLSTTPSESPRAQATSRLSTASCPTPKLLNPEDDLLPGKIRDSNRSTLLATIQEHGYPTINLGIVGDNPDDLLNALNEGISRADVIITSGGVSMGEKDYLKQVLDIDLHAQIHFGRVFMKPGLPTTFATLDIDGVRKI…	lcl|GPHN_10:8-1555_ORF1_GPHN_10:7:1554	['GPHN_10_ORF1']
GPHN_11	ORF1	691	75.1	GPHN	E40	ATGGCGACCGAGGGA	ATGGCGACCGAGGGAATGATCCTCACCAACCACGACCATCAAATCCGTGTCGGAGTCCTCACAGTGAGTGATAGCTGCTTCAGGAATCTTGCAGAAGACCGCAGTGGGATAAATCTAAAAGATCTTGTCCAAGATCCTTCTTTGTTGGGTGGGACTATATCGGCATACAAGATAGTACCAGATGAAATAGAAGAAATCAAGGAAACACTCATAGACTGGTGTGATGAAAAGGAACTTAATTTAATATTAACAACTGGAGGAACGGGGTTTGCACCACGAGATGTCACTCCAGAGGCCACAAAAGAAGTAATAGAGCGGGAAGCGCCAGGGATGGCCCTGGCAATGCTGATGGGATCGCTCAATGTCACACCTCTGGGCATGCTCTCTAGACCAGTGTGT…	MATEGMILTNHDHQIRVGVLTVSDSCFRNLAEDRSGINLKDLVQDPSLLGGTISAYKIVPDEIEEIKETLIDWCDEKELNLILTTGGTGFAPRDVTPEATKEVIEREAPGMALAMLMGSLNVTPLGMLSRPVCGIRGKTLIINLPGSKKGSQECFQFILPALPHAIDLLRDAIVKVKEVHDELEDLPSPPPPLSPPPTTSPHKQTEDKGVQCEEEEEEKKDSGVASTEDSSSSHITAAALAAKVQSRCSSKENILRASHSAVDITKVARRHRMSPFPLTSMDKAFITVLEMTPVLGTEIINYRDGMGRVLAQDVYAKDNLPPFPASVKDGYAVRAADGPGDRFIIGESQAGEQPTQTVMPGQVMRVTTGAPIPCGADAVVQVEDTELIRESDDGTEELE…	lcl|GPHN_11:8-2083_ORF1_GPHN_11:7:2082	['GPHN_11_ORF1']
GPHN_12	ORF1	790	86.08	GPHN	E40	ATGGCGACCGAGGGA	ATGGCGACCGAGGGAATGATCCTCACCAACCACGACCATCAAATCCGTGTCGGAGTCCTCACAGTGAGTGATAGCTGCTTCAGGAATCTTGCAGAAGACCGCAGTGGGATAAATCTAAAAGATCTTGTCCAAGATCCTTCTTTGTTGGGTGGGACTATATCGGCATACAAGATAGTACCAGATGAAATAGAAGAAATCAAGGAAACACTCATAGACTGGTGTGATGAAAAGGAACTTAATTTAATATTAACAACTGGAGGAACGGGGTTTGCACCACGAGATGTCACTCCAGAGGCCACAAAAGAAGTAATAGAGCGGGAAGCGCCAGGGATGGCCCTGGCAATGCTGATGGGATCGCTCAATGTCACACCTCTGGGCATGCTCTCTAGACCAGTGTGT…	MATEGMILTNHDHQIRVGVLTVSDSCFRNLAEDRSGINLKDLVQDPSLLGGTISAYKIVPDEIEEIKETLIDWCDEKELNLILTTGGTGFAPRDVTPEATKEVIEREAPGMALAMLMGSLNVTPLGMLSRPVCGIRGKTLIINLPGSKKGSQECFQFILPALPHAIDLLRDAIVKVKEVHDELEDLPSPPPPLSPPPTTSPHKQTEDKGVQCEEEEEEKKDSGVASTEDSSSSHITAAALAAKIPDSIISRGVQVLPRDTASLSTTPSESPRAQATSRLSTASCPTPKQIRRPDESKGVASRVGSLKYLLSLGDFVHKTFKLHSRLEGLKDELWRNRGYDLRVQSRCSSKENILRASHSAVDITKVARRHRMSPFPLTSMDKAFITVLEMTPVLGTEII…	lcl|GPHN_12:8-2380_ORF1_GPHN_12:7:2379	['GPHN_12_ORF1']
	ORF2	105	12.21	unknown	PTC	CTGCAGCAGCTCTTG	CTGCAGCAGCTCTTGCTGCAAAGATTCCAGACTCCATCATTTCTCGTGGTGTTCAGGTGCTCCCACGAGACACAGCCTCCCTTAGCACTACTCCTTCAGAATCGCCCCGTGCTCAGGCTACATCTCGCCTCTCTACAGCTTCTTGTCCAACACCAAAACAAATTAGACGGCCGGATGAAAGCAAAGGAGTTGCTAGTAGAGTTGGATCCCTCAAATATCTATTATCACTGGGAGATTTTGTACATAAAACATTTAAGCTCCACTCTAGATTGGAAGGGCTTAAAGATGAACTCTGGAGGAATAGAGGCTACGACTTAA	MQQLLLQRFQTPSFLVVFRCSHETQPPLALLLQNRPVLRLHLASLQLLVQHQNKLDGRMKAKELLVELDPSNIYYHWEILYIKHLSSTLDWKGLKMNSGGIEATT	lcl|GPHN_12:714-1031_ORF2_GPHN_12:713:1030	['GPHN_103_ORF2', 'GPHN_12_ORF2', 'GPHN_178_ORF2', 'GPHN_180_ORF1', 'GPHN_263_ORF2', 'GPHN_273_ORF2', 'GPHN_48_ORF2']
GPHN_13	ORF1	658	71.4	GPHN	E40	ATGGCGACCGAGGGA	ATGGCGACCGAGGGAATGATCCTCACCAACCACGACCATCAAATCCGTGTCGGAGTCCTCACAGTGAGTGATAGCTGCTTCAGGAATCTTGCAGAAGACCGCAGTGGGATAAATCTAAAAGATCTTGTCCAAGATCCTTCTTTGTTGGGTGGGACTATATCGGCATACAAGATAGTACCAGATGAAATAGAAGAAATCAAGGAAACACTCATAGACTGGTGTGATGAAAAGGAACTTAATTTAATATTAACAACTGGAGGAACGGGGTTTGCACCACGAGATGTCACTCCAGAGAAATTCCCAACATTCCCATTTTGTGGGCTCCAGAAAGGGGCCACAAAAGAAGTAATAGAGCGGGAAGCGCCAGGGATGGCCCTGGCAATGCTGATGGGATCGCTC…	MATEGMILTNHDHQIRVGVLTVSDSCFRNLAEDRSGINLKDLVQDPSLLGGTISAYKIVPDEIEEIKETLIDWCDEKELNLILTTGGTGFAPRDVTPEKFPTFPFCGLQKGATKEVIEREAPGMALAMLMGSLNVTPLGMLSRPVCGIRGKTLIINLPGSKKGSQIPDSIISRGVQVLPRDTASLSTTPSESPRAQATSRLSTASCPTPKVQSRCSSKENILRASHSAVDITKVARRHRMSPFPLTSMDKAFITVLEMTPVLGTEIINYRDGMGRVLAQDVYAKDNLPPFPASVKDGYAVRAADGPGDRFIIGESQAGEQPTQTVMPGQVMRVTTGAPIPCGADAVVQVEDTELIRESDDGTEELEVRILVQARPGQDIRPIGHDIKRGECVLAKGTHM…	lcl|GPHN_13:8-1984_ORF1_GPHN_13:7:1983	['GPHN_13_ORF1']
GPHN_14	ORF1	705	76.34	GPHN	E40	ATGGCGACCGAGGGA	ATGGCGACCGAGGGAATGATCCTCACCAACCACGACCATCAAATCCGTGTCGGAGTCCTCACAGTGAGTGATAGCTGCTTCAGGAATCTTGCAGAAGACCGCAGTGGGATAAATCTAAAAGATCTTGTCCAAGATCCTTCTTTGTTGGGTGGGACTATATCGGCATACAAGATAGTACCAGATGAAATAGAAGAAATCAAGGCCACAAAAGAAGTAATAGAGCGGGAAGCGCCAGGGATGGCCCTGGCAATGCTGATGGGATCGCTCAATGTCACACCTCTGGGCATGCTCTCTAGACCAGTGTGTGGAATAAGGGGGAAAACTCTGATAATTAACCTACCTGGTAGCAAGAAAGGATCTCAGGAATGCTTTCAGTTCATACTGCCAGCTCTACCTCAT…	MATEGMILTNHDHQIRVGVLTVSDSCFRNLAEDRSGINLKDLVQDPSLLGGTISAYKIVPDEIEEIKATKEVIEREAPGMALAMLMGSLNVTPLGMLSRPVCGIRGKTLIINLPGSKKGSQECFQFILPALPHAIDLLRDAIVKVKEVHDELEDLPSPPPPLSPPPTTSPHKQTEDKGVQCEEEEEEKKDSGVASTEDSSSSHITAAALAAKIPDSIISRGVQVLPRDTASLSTTPSESPRAQATSRLSTASCPTPKVQSRCSSKENILRASHSAVDITKVARRHRMSPFPLTSMDKAFITVLEMTPVLGTEIINYRDGMGRVLAQDVYAKDNLPPFPASVKDGYAVRAADGPGDRFIIGESQAGEQPTQTVMPGQVMRVTTGAPIPCGADAVVQVEDT…	lcl|GPHN_14:8-2125_ORF1_GPHN_14:7:2124	['GPHN_14_ORF1']
GPHN_15	ORF1	419	45.61	GPHN	E40	ATGTCTCCTTTTCCC	ATGTCTCCTTTTCCCCTGACGTCTATGGACAAAGCCTTCATTACAGTCCTGGAGATGACTCCGGTGCTTGGTACAGAAATCATCAATTACCGAGATGGAATGGGGCGAGTCCTTGCTCAAGATGTATATGCAAAAGACAACCTACCCCCATTCCCTGCATCAGTAAAAGATGGCTATGCTGTTCGAGCTGCTGATGGTCCAGGGGATCGTTTCATCATTGGGGAATCCCAAGCTGGTGAGCAGCCAACTCAGACAGTAATGCCAGGACAAGTGATGCGGGTTACAACAGGTGCTCCAATCCCCTGCGGTGCTGATGCAGTAGTGCAAGTTGAAGATACTGAACTCATCAGGGAATCAGATGATGGTACTGAAGAACTTGAAGTACGAATTCTGGTGCAA…	MSPFPLTSMDKAFITVLEMTPVLGTEIINYRDGMGRVLAQDVYAKDNLPPFPASVKDGYAVRAADGPGDRFIIGESQAGEQPTQTVMPGQVMRVTTGAPIPCGADAVVQVEDTELIRESDDGTEELEVRILVQARPGQDIRPIGHDIKRGECVLAKGTHMGPSEIGLLATVGVTEVEVNKFPVVAVMSTGNELLNPEDDLLPGKIRDSNRSTLLATIQEHGYPTINLGIVGDNPDDLLNALNEGISRADVIITSGGVSMGEKDYLKQVLDIDLHAQIHFGRVFMKPGLPTTFATLDIDGVRKIIFALPGNPVSAVVTCNLFVVPALRKMQGILDPRPTIIKARLSCDVKLDPRPEYHRCILTWHHQEPLPWAQSTGNQMSSRLMSMRSANGLLMLPPKT…	lcl|GPHN_15:159-1418_ORF1_GPHN_15:158:1417	['GPHN_110_ORF1', 'GPHN_15_ORF1', 'GPHN_173_ORF1', 'GPHN_192_ORF2', 'GPHN_209_ORF3', 'GPHN_227_ORF2', 'GPHN_228_ORF2', 'GPHN_257_ORF1', 'GPHN_264_ORF2', 'GPHN_265_ORF2', 'GPHN_268_ORF2', 'GPHN_30_ORF1', 'GPHN_36_ORF1', 'GPHN_52_ORF1', 'GPHN_80_ORF2']
GPHN_16	ORF1	782	84.93	GPHN	E40	ATGGCGACCGAGGGA	ATGGCGACCGAGGGAATGATCCTCACCAACCACGACCATCAAATCCGTGTCGGAGTCCTCACAGTGAGTGATAGCTGCTTCAGGAATCTTGCAGAAGACCGCAGTGGGATAAATCTAAAAGATCTTGTCCAAGATCCTTCTTTGTTGGGTGGGACTATATCGGCATACAAGATAGTACCAGATGAAATAGAAGAAATCAAGGAAACACTCATAGACTGGTGTGATGAAAAGGAACTTAATTTAATATTAACAACTGGAGGAACGGGGTTTGCACCACGAGATGTCACTCCAGAGAAATTCCCAACATTCCCATTTTGTGGGCTCCAGAAAGGGGCCACAAAAGAAGTAATAGAGCGGGAAGCGCCAGGGATGGCCCTGGCAATGCTGATGGGATCGCTC…	MATEGMILTNHDHQIRVGVLTVSDSCFRNLAEDRSGINLKDLVQDPSLLGGTISAYKIVPDEIEEIKETLIDWCDEKELNLILTTGGTGFAPRDVTPEKFPTFPFCGLQKGATKEVIEREAPGMALAMLMGSLNVTPLGMLSRPVCGIRGKTLIINLPGSKKGSQECFQFILPALPHAIDLLRDAIVKVKEVHDELEDLPSPPPPLSPPPTTSPHKQTEDKGVQCEEEEEEKKDSGVASTEDSSSSHITAAALAAKIPDSIISRGVQVLPRDTASLSTTPSESPRAQATSRLSTASCPTPKQIRRPDESKGVASRVGSLKYLLSLGDFVHKTFKVQSRCSSKENILRASHSAVDITKVARRHRMSPFPLTSMDKAFITVLEMTPVLGTEIINYRDGMGR…	lcl|GPHN_16:8-2356_ORF1_GPHN_16:7:2355	['GPHN_16_ORF1']
GPHN_17	ORF1	439	47.89	GPHN	E40	TTGTCCAACACCAAA	TTGTCCAACACCAAAAGTCACAGTGCTGTAGATATCACCAAGGTGGCTAGAAGACATCGCATGTCTCCTTTTCCCCTGACGTCTATGGACAAAGCCTTCATTACAGTCCTGGAGATGACTCCGGTGCTTGGTACAGAAATCATCAATTACCGAGATGGAATGGGGCGAGTCCTTGCTCAAGATGTATATGCAAAAGACAACCTACCCCCATTCCCTGCATCAGTAAAAGATGGCTATGCTGTTCGAGCTGCTGATGGTCCAGGGGATCGTTTCATCATTGGGGAATCCCAAGCTGGTGAGCAGCCAACTCAGACAGTAATGCCAGGACAAGTGATGCGGGTTACAACAGGTGCTCCAATCCCCTGCGGTGCTGATGCAGTAGTGCAAGTTGAAGATACT…	MSNTKSHSAVDITKVARRHRMSPFPLTSMDKAFITVLEMTPVLGTEIINYRDGMGRVLAQDVYAKDNLPPFPASVKDGYAVRAADGPGDRFIIGESQAGEQPTQTVMPGQVMRVTTGAPIPCGADAVVQVEDTELIRESDDGTEELEVRILVQARPGQDIRPIGHDIKRGECVLAKGTHMGPSEIGLLATVGVTEVEVNKFPVVAVMSTGNELLNPEDDLLPGKIRDSNRSTLLATIQEHGYPTINLGIVGDNPDDLLNALNEGISRADVIITSGGVSMGEKDYLKQVLDIDLHAQIHFGRVFMKPGLPTTFATLDIDGVRKIIFALPGNPVSAVVTCNLFVVPALRKMQGILDPRPTIIKARLSCDVKLDPRPEYHRCILTWHHQEPLPWAQSTGNQM…	lcl|GPHN_17:856-2175_ORF1_GPHN_17:855:2174	['GPHN_100_ORF1', 'GPHN_101_ORF1', 'GPHN_151_ORF1', 'GPHN_17_ORF1', 'GPHN_182_ORF2', 'GPHN_244_ORF1', 'GPHN_67_ORF1']
	ORF2	292	31.29	GPHN	PTC	ATGGCGACCGAGGGA	ATGGCGACCGAGGGAATGATCCTCACCAACCACGACCATCAAATCCGTGTCGGAGTCCTCACAGTGAGTGATAGCTGCTTCAGGAATCTTGCAGAAGACCGCAGTGGGATAAATCTAAAAGATCTTGTCCAAGATCCTTCTTTGTTGGGTGGGACTATATCGGCATACAAGATAGTACCAGATGAAATAGAAGAAATCAAGGAAACACTCATAGACTGGTGTGATGAAAAGGAACTTAATTTAATATTAACAACTGGAGGAACGGGGTTTGCACCACGAGATGTCACTCCAGAGGCCACAAAAGAAGTAATAGAGCGGGAAGCGCCAGGGATGGCCCTGGCAATGCTGATGGGATCGCTCAATGTCACACCTCTGGGCATGCTCTCTAGACCAGTGTGT…	MATEGMILTNHDHQIRVGVLTVSDSCFRNLAEDRSGINLKDLVQDPSLLGGTISAYKIVPDEIEEIKETLIDWCDEKELNLILTTGGTGFAPRDVTPEATKEVIEREAPGMALAMLMGSLNVTPLGMLSRPVCGIRGKTLIINLPGSKKGSQECFQFILPALPHAIDLLRDAIVKVKEVHDELEDLPSPPPPLSPPPTTSPHKQTEDKGVQCEEEEEEKKDSGVASTEDSSSSHITAAALAAKIPDSIISRGVQVLPRDTASLSTTPSESPRAQATSRLSTASCPTPKVTVL	lcl|GPHN_17:8-886_ORF2_GPHN_17:7:885	['GPHN_17_ORF2', 'GPHN_195_ORF2']
GPHN_18	ORF1	678	73.67	GPHN	E40	ATGGCGACCGAGGGA	ATGGCGACCGAGGGAATGATCCTCACCAACCACGACCATCAAATCCGTGTCGGAGTCCTCACAGTGAGTGATAGCTGCTTCAGGAATCTTGCAGAAGACCGCAGTGGGATAAATCTAAAAGATCTTGTCCAAGATCCTTCTTTGTTGGGTGGGACTATATCGGCATACAAGATAGTACCAGATGAAATAGAAGAAATCAAGGAAACACTCATAGACTGGTGTGATGAAAAGGAACTTAATTTAATATTAACAACTGGAGGAACGGGGTTTGCACCACGAGATGTCACTCCAGAGGCCACAAAAGAAGTAATAGAGCGGGAAGCGCCAGGGATGGCCCTGGCAATGCTGATGGGATCGCTCAATGTCACACCTCTGGGCATGCTCTCTAGACCAGTGTGT…	MATEGMILTNHDHQIRVGVLTVSDSCFRNLAEDRSGINLKDLVQDPSLLGGTISAYKIVPDEIEEIKETLIDWCDEKELNLILTTGGTGFAPRDVTPEATKEVIEREAPGMALAMLMGSLNVTPLGMLSRPVCGIRGKTLIINLPGSKKGSQIPDSIISRGVQVLPRDTASLSTTPSESPRAQATSRLSTASCPTPKQIRRPDESKGVASRVGSLKYLLSLGDFVHKTFKVQSRCSSKENILRASHSAVDITKVARRHRMSPFPLTSMDKAFITVLEMTPVLGTEIINYRDGMGRVLAQDVYAKDNLPPFPASVKDGYAVRAADGPGDRFIIGESQAGEQPTQTVMPGQVMRVTTGAPIPCGADAVVQVEDTELIRESDDGTEELEVRILVQARPGQDI…	lcl|GPHN_18:8-2044_ORF1_GPHN_18:7:2043	['GPHN_18_ORF1']
GPHN_19	ORF1	690	74.55	GPHN	E40	ATGGCGACCGAGGGA	ATGGCGACCGAGGGAATGATCCTCACCAACCACGACCATCAAATCCGTGTCGGAGTCCTCACAGTGAGTGATAGCTGCTTCAGGAATCTTGCAGAAGACCGCAGTGGGATAAATCTAAAAGATCTTGTCCAAGATCCTTCTTTGTTGGGTGGGACTATATCGGCATACAAGATAGTACCAGATGAAATAGAAGAAATCAAGGAAACACTCATAGACTGGTGTGATGAAAAGGAACTTAATTTAATATTAACAACTGGAGGAACGGGGTTTGCACCACGAGATGTCACTCCAGAGGCCACAAAAGAAGTAATAGAGCGGGAAGCGCCAGGGATGGCCCTGGCAATGCTGATGGGATCGCTCAATGTCACACCTCTGGGCATGCTCTCTAGACCAGTGTGT…	MATEGMILTNHDHQIRVGVLTVSDSCFRNLAEDRSGINLKDLVQDPSLLGGTISAYKIVPDEIEEIKETLIDWCDEKELNLILTTGGTGFAPRDVTPEATKEVIEREAPGMALAMLMGSLNVTPLGMLSRPVCGIRGKTLIINLPGSKKGSQECFQFILPALPHAIDLLRDAIVKVKEVHDELEDLPSPPPPLSPPPTTSPHKQTEDKGVQCEEEEEEKKDSGVASTEDSSSSHITAAALAAKIPDSIISRGVQVLPRDTASLSTTPSESPRAQATSRLSTASCPTPKVQSRCSSKENILRANGMGRVLAQDVYAKDNLPPFPASVKDGYAVRAADGPGDRFIIGESQAGEQPTQTVMPGQVMRVTTGAPIPCGADAVVQVEDTELIRESDDGTEELEV…	lcl|GPHN_19:8-2080_ORF1_GPHN_19:7:2079	['GPHN_19_ORF1']
GPHN_20	ORF1	325	35.9	GPHN	E40	ATGGCGACCGAGGGA	ATGGCGACCGAGGGAATGATCCTCACCAACCACGACCATCAAATCCGTGTCGGAGTCCTCACAGTGAGTGATAGCTGCTTCAGGAATCTTGCAGAAGACCGCAGTGGGATAAATCTAAAAGATCTTGTCCAAGATCCTTCTTTGTTGGGTGGGACTATATCGGCATACAAGATAGTACCAGATGAAATAGAAGAAATCAAGGAAACACTCATAGACTGGTGTGATGAAAAGGAACTTAATTTAATATTAACAACTGGAGGAACGGGGTTTGCACCACGAGATGTCACTCCAGAGCTGCTAAATCCTGAAGATGATCTCTTACCAGGAAAGATTCGGGACAGCAATCGATCAACACTTCTAGCAACAATTCAGGAACATGGTTACCCAACAATCAACCTG…	MATEGMILTNHDHQIRVGVLTVSDSCFRNLAEDRSGINLKDLVQDPSLLGGTISAYKIVPDEIEEIKETLIDWCDEKELNLILTTGGTGFAPRDVTPELLNPEDDLLPGKIRDSNRSTLLATIQEHGYPTINLGIVGDNPDDLLNALNEGISRADVIITSGGVSMGEKDYLKQVLDIDLHAQIHFGRVFMKPGLPTTFATLDIDGVRKIIFALPGNPVSAVVTCNLFVVPALRKMQGILDPRPTIIKARLSCDVKLDPRPEYHRCILTWHHQEPLPWAQSTGNQMSSRLMSMRSANGLLMLPPKTEQYVELHKGEVVDVMVIGRL	lcl|GPHN_20:8-985_ORF1_GPHN_20:7:984	['GPHN_20_ORF1']
GPHN_21	ORF1	663	71.39	GPHN	E40	ATGGCGACCGAGGGA	ATGGCGACCGAGGGAATGATCCTCACCAACCACGACCATCAAATCCGTGTCGGAGTCCTCACAGTGAGTGATAGCTGCTTCAGGAATCTTGCAGAAGACCGCAGTGGGATAAATCTAAAAGATCTTGTCCAAGATCCTTCTTTGTTGGGTGGGACTATATCGGCATACAAGATAGTACCAGATGAAATAGAAGAAATCAAGGAAACACTCATAGACTGGTGTGATGAAAAGGAACTTAATTTAATATTAACAACTGGAGGAACGGGGTTTGCACCACGAGATGTCACTCCAGAGGCCACAAAAGAAGTAATAGAGCGGGAAGCGCCAGGGATGGCCCTGGCAATGCTGATGGGATCGCTCAATGTCACACCTCTGGGCATGCTCTCTAGACCAGTGTGT…	MATEGMILTNHDHQIRVGVLTVSDSCFRNLAEDRSGINLKDLVQDPSLLGGTISAYKIVPDEIEEIKETLIDWCDEKELNLILTTGGTGFAPRDVTPEATKEVIEREAPGMALAMLMGSLNVTPLGMLSRPVCGIRGKTLIINLPGSKKGSQECFQFILPALPHAIDLLRDAIVKVKEVHDELEDLPSPPPPLSPPPTTSPHKQTEDKGVQCEEEEEEKKDSGVASTEDSSSSHITAAALAAKIPDSIISRGVQVLPRDTASLSTTPSESPRAQATSRLSTASCPTPKVQSRCSSKENILRASHSAVDITKVARRHRMSPFPLTSMDKAFITVLEMTPVLGTEIINYRDGMGRVLAQDVYAKDNLPPFPASVKDGYAVRAADGPGDRFIIGESQAGEQP…	lcl|GPHN_21:8-1999_ORF1_GPHN_21:7:1998	['GPHN_21_ORF1']
GPHN_22	ORF1	440	48.03	GPHN	E40	TTGTCCAAGATCCTT	TTGTCCAAGATCCTTCTTTGTCACAGTGCTGTAGATATCACCAAGGTGGCTAGAAGACATCGCATGTCTCCTTTTCCCCTGACGTCTATGGACAAAGCCTTCATTACAGTCCTGGAGATGACTCCGGTGCTTGGTACAGAAATCATCAATTACCGAGATGGAATGGGGCGAGTCCTTGCTCAAGATGTATATGCAAAAGACAACCTACCCCCATTCCCTGCATCAGTAAAAGATGGCTATGCTGTTCGAGCTGCTGATGGTCCAGGGGATCGTTTCATCATTGGGGAATCCCAAGCTGGTGAGCAGCCAACTCAGACAGTAATGCCAGGACAAGTGATGCGGGTTACAACAGGTGCTCCAATCCCCTGCGGTGCTGATGCAGTAGTGCAAGTTGAAGAT…	MSKILLCHSAVDITKVARRHRMSPFPLTSMDKAFITVLEMTPVLGTEIINYRDGMGRVLAQDVYAKDNLPPFPASVKDGYAVRAADGPGDRFIIGESQAGEQPTQTVMPGQVMRVTTGAPIPCGADAVVQVEDTELIRESDDGTEELEVRILVQARPGQDIRPIGHDIKRGECVLAKGTHMGPSEIGLLATVGVTEVEVNKFPVVAVMSTGNELLNPEDDLLPGKIRDSNRSTLLATIQEHGYPTINLGIVGDNPDDLLNALNEGISRADVIITSGGVSMGEKDYLKQVLDIDLHAQIHFGRVFMKPGLPTTFATLDIDGVRKIIFALPGNPVSAVVTCNLFVVPALRKMQGILDPRPTIIKARLSCDVKLDPRPEYHRCILTWHHQEPLPWAQSTGNQ…	lcl|GPHN_22:132-1454_ORF1_GPHN_22:131:1453	['GPHN_22_ORF1']
GPHN_23	ORF1	783	84.94	GPHN	E40	ATGGCGACCGAGGGA	ATGGCGACCGAGGGAATGATCCTCACCAACCACGACCATCAAATCCGTGTCGGAGTCCTCACAGTGAGTGATAGCTGCTTCAGGAATCTTGCAGAAGACCGCAGTGGGATAAATCTAAAAGATCTTGTCCAAGATCCTTCTTTGTTGGGTGGGACTATATCGGCATACAAGATAGTACCAGATGAAATAGAAGAAATCAAGGAAACACTCATAGACTGGTGTGATGAAAAGGAACTTAATTTAATATTAACAACTGGAGGAACGGGGTTTGCACCACGAGATGTCACTCCAGAGGCCACAAAAGAAGTAATAGAGCGGGAAGCGCCAGGGATGGCCCTGGCAATGCTGATGGGATCGCTCAATGTCACACCTCTGGGCATGCTCTCTAGACCAGTGTGT…	MATEGMILTNHDHQIRVGVLTVSDSCFRNLAEDRSGINLKDLVQDPSLLGGTISAYKIVPDEIEEIKETLIDWCDEKELNLILTTGGTGFAPRDVTPEATKEVIEREAPGMALAMLMGSLNVTPLGMLSRPVCGIRGKTLIINLPGSKKGSQECFQFILPALPHAIDLLRDAIVKVKEVHDELEDLPSPPPPLSPPPTTSPHKQTEDKGVQCEEEEEEKKDSGVASTEDSSSSHITAAALAAKIPDSIISRGVQVLPRDTASLSTTPSESPRAQATSRLSTASCPTPKQIRRPDESKGVASRVGSLKYLLSLGDFVHKTFKARLPSCSSTYSVSEVQSRCSSKENILRASHSAVDITKVARRHRMSPFPLTSMDKAFITVLEMTPVLGTEIINYRDGMG…	lcl|GPHN_23:8-2359_ORF1_GPHN_23:7:2358	['GPHN_23_ORF1']
	ORF2	111	13.08	unknown	PTC	CTGCAGCAGCTCTTG	CTGCAGCAGCTCTTGCTGCAAAGATTCCAGACTCCATCATTTCTCGTGGTGTTCAGGTGCTCCCACGAGACACAGCCTCCCTTAGCACTACTCCTTCAGAATCGCCCCGTGCTCAGGCTACATCTCGCCTCTCTACAGCTTCTTGTCCAACACCAAAACAAATTAGACGGCCGGATGAAAGCAAAGGAGTTGCTAGTAGAGTTGGATCCCTCAAATATCTATTATCACTGGGAGATTTTGTACATAAAACATTTAAGGCTCGGCTTCCGTCGTGCTCATCTACCTATAGTGTATCTGAGGTCCAGTCCAGGTGCAGCAGCAAGGAGAACATTCTAA	MQQLLLQRFQTPSFLVVFRCSHETQPPLALLLQNRPVLRLHLASLQLLVQHQNKLDGRMKAKELLVELDPSNIYYHWEILYIKHLRLGFRRAHLPIVYLRSSPGAAARRTF	lcl|GPHN_23:714-1049_ORF2_GPHN_23:713:1048	['GPHN_117_ORF2', 'GPHN_138_ORF2', 'GPHN_169_ORF1', 'GPHN_23_ORF2', 'GPHN_274_ORF2', 'GPHN_277_ORF2', 'GPHN_81_ORF2']
GPHN_24	ORF1	688	74.48	GPHN	E40	TTGGGTGGGACTATA	TTGGGTGGGACTATATCGGCATACAAGATAGTACCAGATGAAATAGAAGAAATCAAGGAAACACTCATAGACTGGTGTGATGAAAAGGAACTTAATTTAATATTAACAACTGGAGGAACGGGGTTTGCACCACGAGATGTCACTCCAGAGGCCACAAAAGAAGTAATAGAGCGGGAAGCGCCAGGGATGGCCCTGGCAATGCTGATGGGATCGCTCAATGTCACACCTCTGGGCATGCTCTCTAGACCAGTGTGTGGAATAAGGGGGAAAACTCTGATAATTAACCTACCTGGTAGCAAGAAAGGATCTCAGGAATGCTTTCAGTTCATACTGCCAGCTCTACCTCATGCCATTGACCTTTTACGTGATGCCATTGTAAAAGTAAAGGAGGTGCATGAT…	MGGTISAYKIVPDEIEEIKETLIDWCDEKELNLILTTGGTGFAPRDVTPEATKEVIEREAPGMALAMLMGSLNVTPLGMLSRPVCGIRGKTLIINLPGSKKGSQECFQFILPALPHAIDLLRDAIVKVKEVHDELEDLPSPPPPLSPPPTTSPHKQTEDKGVQCEEEEEEKKDSGVASTEDSSSSHITAAALAAKIPDSIISRGVQVLPRDTASLSTTPSESPRAQATSRLSTASCPTPKVQSRCSSKENILRASHSAVDITKVARRHRMSPFPLTSMDKAFITVLEMTPVLGTEIINYRDGMGRVLAQDVYAKDNLPPFPASVKDGYAVRAADGPGDRFIIGESQAGEQPTQTVMPGQVMRVTTGAPIPCGADAVVQVEDTELIRESDDGTEELEVRI…	lcl|GPHN_24:73-2139_ORF1_GPHN_24:72:2138	['GPHN_24_ORF1']
GPHN_25	ORF1	206	22.9	GPHN	E40	TTGTCCAACACCAAA	TTGTCCAACACCAAAAGTCCAGTCCAGGTGCAGCAGCAAGGAGAACATTCTAAGAGCCACCCAGATGACTTACTCAATGCCTTGAATGAGGGTATCAGCCGTGCTGATGTCATCATCACGTCAGGAGGTGTGTCCATGGGGGAAAAGGACTATCTCAAGCAGGTGCTGGACATTGATCTTCATGCTCAGATCCATTTTGGCAGAGTTTTTATGAAGCCAGGCTTGCCAACAACATTTGCAACTTTGGATATTGATGGTGTAAGAAAAATTATTTTTGCACTACCAGGGAATCCTGTATCAGCTGTGGTCACCTGCAACCTCTTTGTTGTACCTGCACTGAGAAAGATGCAGGGTATCTTGGATCCTCGGCCAACCATCATCAAAGCCAGGTTATCGTGT…	MSNTKSPVQVQQQGEHSKSHPDDLLNALNEGISRADVIITSGGVSMGEKDYLKQVLDIDLHAQIHFGRVFMKPGLPTTFATLDIDGVRKIIFALPGNPVSAVVTCNLFVVPALRKMQGILDPRPTIIKARLSCDVKLDPRPEYHRCILTWHHQEPLPWAQSTGNQMSSRLMSMRSANGLLMLPPKTEQYVELHKGEVVDVMVIGRL	lcl|GPHN_25:856-1476_ORF1_GPHN_25:855:1475	['GPHN_139_ORF1', 'GPHN_25_ORF1']
	ORF2	310	33.39	GPHN	PTC	ATGGCGACCGAGGGA	ATGGCGACCGAGGGAATGATCCTCACCAACCACGACCATCAAATCCGTGTCGGAGTCCTCACAGTGAGTGATAGCTGCTTCAGGAATCTTGCAGAAGACCGCAGTGGGATAAATCTAAAAGATCTTGTCCAAGATCCTTCTTTGTTGGGTGGGACTATATCGGCATACAAGATAGTACCAGATGAAATAGAAGAAATCAAGGAAACACTCATAGACTGGTGTGATGAAAAGGAACTTAATTTAATATTAACAACTGGAGGAACGGGGTTTGCACCACGAGATGTCACTCCAGAGGCCACAAAAGAAGTAATAGAGCGGGAAGCGCCAGGGATGGCCCTGGCAATGCTGATGGGATCGCTCAATGTCACACCTCTGGGCATGCTCTCTAGACCAGTGTGT…	MATEGMILTNHDHQIRVGVLTVSDSCFRNLAEDRSGINLKDLVQDPSLLGGTISAYKIVPDEIEEIKETLIDWCDEKELNLILTTGGTGFAPRDVTPEATKEVIEREAPGMALAMLMGSLNVTPLGMLSRPVCGIRGKTLIINLPGSKKGSQECFQFILPALPHAIDLLRDAIVKVKEVHDELEDLPSPPPPLSPPPTTSPHKQTEDKGVQCEEEEEEKKDSGVASTEDSSSSHITAAALAAKIPDSIISRGVQVLPRDTASLSTTPSESPRAQATSRLSTASCPTPKVQSRCSSKENILRATQMTYSMP	lcl|GPHN_25:8-940_ORF2_GPHN_25:7:939	['GPHN_25_ORF2']
GPHN_26	ORF1	699	76.28	GPHN	E40	ATGGCGACCGAGGGA	ATGGCGACCGAGGGAATGATCCTCACCAACCACGACCATCAAATCCGTGTCGGAGTCCTCACAGTGAGTGATAGCTGCTTCAGGAATCTTGCAGAAGACCGCAGTGGGATAAATCTAAAAGATCTTGTCCAAGATCCTTCTTTGTTGGGTGGGACTATATCGGCATACAAGATAGTACCAGATGAAATAGAAGAAATCAAGGAAACACTCATAGACTGGTGTGATGAAAAGGAACTTAATTTAATATTAACAACTGGAGGAACGGGGTTTGCACCACGAGATGTCACTCCAGAGGCCACAAAAGAAGTAATAGAGCGGGAAGCGCCAGGGATGGCCCTGGCAATGCTGATGGGATCGCTCAATGTCACACCTCTGGGCATGCTCTCTAGACCAGTGTGT…	MATEGMILTNHDHQIRVGVLTVSDSCFRNLAEDRSGINLKDLVQDPSLLGGTISAYKIVPDEIEEIKETLIDWCDEKELNLILTTGGTGFAPRDVTPEATKEVIEREAPGMALAMLMGSLNVTPLGMLSRPVCGIRGKTLIINLPGSKKGSQIPDSIISRGVQVLPRDTASLSTTPSESPRAQATSRLSTASCPTPKQIRRPDESKGVASRVGSLKYLLSLGDFVHKTFKLHSRLEGLKDELWRNRGYDLRVQSRCSSKENILRASHSAVDITKVARRHRMSPFPLTSMDKAFITVLEMTPVLGTEIINYRDGMGRVLAQDVYAKDNLPPFPASVKDGYAVRAADGPGDRFIIGESQAGEQPTQTVMPGQVMRVTTGAPIPCGADAVVQVEDTELIRES…	lcl|GPHN_26:8-2107_ORF1_GPHN_26:7:2106	['GPHN_26_ORF1']
	ORF2	105	12.17	unknown	PTC	CTGGTAGCAAGAAAG	CTGGTAGCAAGAAAGGATCTCAGATTCCAGACTCCATCATTTCTCGTGGTGTTCAGGTGCTCCCACGAGACACAGCCTCCCTTAGCACTACTCCTTCAGAATCGCCCCGTGCTCAGGCTACATCTCGCCTCTCTACAGCTTCTTGTCCAACACCAAAACAAATTAGACGGCCGGATGAAAGCAAAGGAGTTGCTAGTAGAGTTGGATCCCTCAAATATCTATTATCACTGGGAGATTTTGTACATAAAACATTTAAGCTCCACTCTAGATTGGAAGGGCTTAAAGATGAACTCTGGAGGAATAGAGGCTACGACTTAA	MVARKDLRFQTPSFLVVFRCSHETQPPLALLLQNRPVLRLHLASLQLLVQHQNKLDGRMKAKELLVELDPSNIYYHWEILYIKHLSSTLDWKGLKMNSGGIEATT	lcl|GPHN_26:441-758_ORF2_GPHN_26:440:757	['GPHN_141_ORF2', 'GPHN_165_ORF2', 'GPHN_237_ORF2', 'GPHN_26_ORF2', 'GPHN_272_ORF2']
GPHN_27	ORF1	600	65.29	GPHN	E40	ATGGCGACCGAGGGA	ATGGCGACCGAGGGAATGATCCTCACCAACCACGACCATCAAATCCGTGTCGGAGTCCTCACAGTGAGTGATAGCTGCTTCAGGAATCTTGCAGAAGACCGCAGTGGGATAAATCTAAAAGATCTTGTCCAAGATCCTTCTTTGTTGGGTGGGACTATATCGGCATACAAGATAGTACCAGATGAAATAGAAGAAATCAAGGAAACACTCATAGACTGGTGTGATGAAAAGGAACTTAATTTAATATTAACAACTGGAGGAACGGGGTTTGCACCACGAGATGTCACTCCAGAGGCCACAAAAGAAGTAATAGAGCGGGAAGCGCCAGGGATGGCCCTGGCAATGCTGATGGGATCGCTCAATGTCACACCTCTGGGCATGCTCTCTAGACCAGTGTGT…	MATEGMILTNHDHQIRVGVLTVSDSCFRNLAEDRSGINLKDLVQDPSLLGGTISAYKIVPDEIEEIKETLIDWCDEKELNLILTTGGTGFAPRDVTPEATKEVIEREAPGMALAMLMGSLNVTPLGMLSRPVCGIRGKTLIINLPGSKKGSQVQSRCSSKENILRASHSAVDITKVARRHRMSPFPLTSMDKAFITVLEMTPVLGTEIINYRDGMGRVLAQDVYAKDNLPPFPASVKDGYAVRAADGPGDRFIIGESQAGEQPTQTVMPGQVMRVTTGAPIPCGADAVVQVEDTELIRESDDGTEELEVRILVQARPGQDIRPIGHDIKRGECVLAKGTHMGPSEIGLLATVGVTEVEVNKFPVVAVMSTGNELLNPEDDLLPGKIRDSNRSTLLATIQ…	lcl|GPHN_27:8-1810_ORF1_GPHN_27:7:1809	['GPHN_27_ORF1']
GPHN_28	ORF1	445	48.58	GPHN	E40	ATGGCGACCGAGGGA	ATGGCGACCGAGGGAATGATCCTCACCAACCACGACCATCAAATCCGTGTCGGAGTCCTCACAGTGAGTGATAGCTGCTTCAGGAATCTTGCAGAAGACCGCAGTGGGATAAATCTAAAAGATCTTGTCCAAGATCCTTCTTTGTTGGGTGGGACTATATCGGCATACAAGATAGTACCAGATGAAATAGAAGAAATCAAGGAAACACTCATAGACTGGTGTGATGAAAAGGAACTTAATTTAATATTAACAACTGGAGGAACGGGGTTTGCACCACGAGATGTCACTCCAGAGGCCACAAAAGAAGTAATAGAGCGGGAAGCGCCAGGGATGGCCCTGGCAATGCTGATGGGATCGCTCAATGTCACACCTCTGGGCATGCTCTCTAGACCAGTGTGT…	MATEGMILTNHDHQIRVGVLTVSDSCFRNLAEDRSGINLKDLVQDPSLLGGTISAYKIVPDEIEEIKETLIDWCDEKELNLILTTGGTGFAPRDVTPEATKEVIEREAPGMALAMLMGSLNVTPLGMLSRPVCGIRGKTLIINLPGSKKGSQECFQFILPALPHAIDLLRDAIVKVKEVHDELEDLPSPPPPLSPPPTTSPHKQTEDKGVQCEEEEEEKKDSGVASTEDSSSSHITAAALAAKIPDSIISRGVQVLPRDTASLSTTPSESPRAQATSRLSTASCPTPKDYLKQVLDIDLHAQIHFGRVFMKPGLPTTFATLDIDGVRKIIFALPGNPVSAVVTCNLFVVPALRKMQGILDPRPTIIKARLSCDVKLDPRPEYHRCILTWHHQEPLPWAQ…	lcl|GPHN_28:8-1345_ORF1_GPHN_28:7:1344	['GPHN_28_ORF1']
GPHN_29	ORF1	771	83.84	GPHN	E40	ATGGCGACCGAGGGA	ATGGCGACCGAGGGAATGATCCTCACCAACCACGACCATCAAATCCGTGTCGGAGTCCTCACAGTGAGTGATAGCTGCTTCAGGAATCTTGCAGAAGACCGCAGTGGGATAAATCTAAAAGATCTTGTCCAAGATCCTTCTTTGTTGGGTGGGACTATATCGGCATACAAGATAGTACCAGATGAAATAGAAGAAATCAAGGAAACACTCATAGACTGGTGTGATGAAAAGGAACTTAATTTAATATTAACAACTGGAGGAACGGGGTTTGCACCACGAGATGTCACTCCAGAGGCCACAAAAGAAGTAATAGAGCGGGAAGCGCCAGGGATGGCCCTGGCAATGCTGATGGGATCGCTCAATGTCACACCTCTGGGCATGCTCTCTAGACCAGTGTGT…	MATEGMILTNHDHQIRVGVLTVSDSCFRNLAEDRSGINLKDLVQDPSLLGGTISAYKIVPDEIEEIKETLIDWCDEKELNLILTTGGTGFAPRDVTPEATKEVIEREAPGMALAMLMGSLNVTPLGMLSRPVCGIRGKTLIINLPGSKKGSQECFQFILPALPHAIDLLRDAIVKVKEVHDELEDLPSPPPPLSPPPTTSPHKQTEDKGVQCEEEEEEKKDSGVASTEDSSSSHITAAALAAKIPDSIISRGVQVLPRDTASLSTTPSESPRAQATSRLSTASCPTPKARLPSCSSTYSVSELHSRLEGLKDELWRNRGYDLRVQSRCSSKENILRASHSAVDITKVARRHRMSPFPLTSMDKAFITVLEMTPVLGTEIINYRDGMGRVLAQDVYAKDN…	lcl|GPHN_29:8-2323_ORF1_GPHN_29:7:2322	['GPHN_29_ORF1']
GPHN_30	ORF1	419	45.61	GPHN	E40	ATGTCTCCTTTTCCC	ATGTCTCCTTTTCCCCTGACGTCTATGGACAAAGCCTTCATTACAGTCCTGGAGATGACTCCGGTGCTTGGTACAGAAATCATCAATTACCGAGATGGAATGGGGCGAGTCCTTGCTCAAGATGTATATGCAAAAGACAACCTACCCCCATTCCCTGCATCAGTAAAAGATGGCTATGCTGTTCGAGCTGCTGATGGTCCAGGGGATCGTTTCATCATTGGGGAATCCCAAGCTGGTGAGCAGCCAACTCAGACAGTAATGCCAGGACAAGTGATGCGGGTTACAACAGGTGCTCCAATCCCCTGCGGTGCTGATGCAGTAGTGCAAGTTGAAGATACTGAACTCATCAGGGAATCAGATGATGGTACTGAAGAACTTGAAGTACGAATTCTGGTGCAA…	MSPFPLTSMDKAFITVLEMTPVLGTEIINYRDGMGRVLAQDVYAKDNLPPFPASVKDGYAVRAADGPGDRFIIGESQAGEQPTQTVMPGQVMRVTTGAPIPCGADAVVQVEDTELIRESDDGTEELEVRILVQARPGQDIRPIGHDIKRGECVLAKGTHMGPSEIGLLATVGVTEVEVNKFPVVAVMSTGNELLNPEDDLLPGKIRDSNRSTLLATIQEHGYPTINLGIVGDNPDDLLNALNEGISRADVIITSGGVSMGEKDYLKQVLDIDLHAQIHFGRVFMKPGLPTTFATLDIDGVRKIIFALPGNPVSAVVTCNLFVVPALRKMQGILDPRPTIIKARLSCDVKLDPRPEYHRCILTWHHQEPLPWAQSTGNQMSSRLMSMRSANGLLMLPPKT…	lcl|GPHN_30:346-1605_ORF1_GPHN_30:345:1604	['GPHN_110_ORF1', 'GPHN_15_ORF1', 'GPHN_173_ORF1', 'GPHN_192_ORF2', 'GPHN_209_ORF3', 'GPHN_227_ORF2', 'GPHN_228_ORF2', 'GPHN_257_ORF1', 'GPHN_264_ORF2', 'GPHN_265_ORF2', 'GPHN_268_ORF2', 'GPHN_30_ORF1', 'GPHN_36_ORF1', 'GPHN_52_ORF1', 'GPHN_80_ORF2']
	ORF2	102	11.2	GPHN	PTC	ATGGCGACCGAGGGA	ATGGCGACCGAGGGAATGATCCTCACCAACCACGACCATCAAATCCGTGTCGGAGTCCTCACAGTGAGTGATAGCTGCTTCAGGAATCTTGCAGAAGACCGCAGTGGGATAAATCTAAAAGATCTTGTCCAAGATCCTTCTTTGTTGGGTGGGACTATATCGGCATACAAGATAGTACCAGATGAAATAGAAGAAATCAAGGAAACACTCATAGACTGGTGTGATGAAAAGGAACTTAATTTAATATTAACAACTGGAGGAACGGGGTTTGCACCACGAGATGTCACTCCAGAGGTCACAGTGCTGTAG	MATEGMILTNHDHQIRVGVLTVSDSCFRNLAEDRSGINLKDLVQDPSLLGGTISAYKIVPDEIEEIKETLIDWCDEKELNLILTTGGTGFAPRDVTPEVTVL	lcl|GPHN_30:8-316_ORF2_GPHN_30:7:315	['GPHN_30_ORF2']
GPHN_31	ORF1	666	72.56	GPHN	E40	ATGGCGACCGAGGGA	ATGGCGACCGAGGGAATGATCCTCACCAACCACGACCATCAAATCCGTGTCGGAGTCCTCACAGTGAGTGATAGCTGCTTCAGGAATCTTGCAGAAGACCGCAGTGGGATAAATCTAAAAGATCTTGTCCAAGATCCTTCTTTGTTGGGTGGGACTATATCGGCATACAAGATAGTACCAGATGAAATAGAAGAAATCAAGGAAACACTCATAGACTGGTGTGATGAAAAGGAACTTAATTTAATATTAACAACTGGAGGAACGGGGTTTGCACCACGAGATGTCACTCCAGAGGCCACAAAAGAAGTAATAGAGCGGGAAGCGCCAGGGATGGCCCTGGCAATGCTGATGGGATCGCTCAATGTCACACCTCTGGGCATGCTCTCTAGACCAGTGTGT…	MATEGMILTNHDHQIRVGVLTVSDSCFRNLAEDRSGINLKDLVQDPSLLGGTISAYKIVPDEIEEIKETLIDWCDEKELNLILTTGGTGFAPRDVTPEATKEVIEREAPGMALAMLMGSLNVTPLGMLSRPVCGIRGKTLIINLPGSKKGSQIPDSIISRGVQVLPRDTASLSTTPSESPRAQATSRLSTASCPTPKLHSRLEGLKDELWRNRGYDLRVQSRCSSKENILRASHSAVDITKVARRHRMSPFPLTSMDKAFITVLEMTPVLGTEIINYRDGMGRVLAQDVYAKDNLPPFPASVKDGYAVRAADGPGDRFIIGESQAGEQPTQTVMPGQVMRVTTGAPIPCGADAVVQVEDTELIRESDDGTEELEVRILVQARPGQDIRPIGHDIKRGEC…	lcl|GPHN_31:8-2008_ORF1_GPHN_31:7:2007	['GPHN_31_ORF1']
GPHN_32	ORF1	628	67.57	GPHN	PTC	ATGGCGACCGAGGGA	ATGGCGACCGAGGGAATGATCCTCACCAACCACGACCATCAAATCCGTGTCGGAGTCCTCACAGTGAGTGATAGCTGCTTCAGGAATCTTGCAGAAGACCGCAGTGGGATAAATCTAAAAGATCTTGTCCAAGATCCTTCTTTGTTGGGTGGGACTATATCGGCATACAAGATAGTACCAGATGAAATAGAAGAAATCAAGGAAACACTCATAGACTGGTGTGATGAAAAGGAACTTAATTTAATATTAACAACTGGAGGAACGGGGTTTGCACCACGAGATGTCACTCCAGAGGCCACAAAAGAAGTAATAGAGCGGGAAGCGCCAGGGATGGCCCTGGCAATGCTGATGGGATCGCTCAATGTCACACCTCTGGGCATGCTCTCTAGACCAGTGTGT…	MATEGMILTNHDHQIRVGVLTVSDSCFRNLAEDRSGINLKDLVQDPSLLGGTISAYKIVPDEIEEIKETLIDWCDEKELNLILTTGGTGFAPRDVTPEATKEVIEREAPGMALAMLMGSLNVTPLGMLSRPVCGIRGKTLIINLPGSKKGSQECFQFILPALPHAIDLLRDAIVKVKEVHDELEDLPSPPPPLSPPPTTSPHKQTEDKGVQCEEEEEEKKDSGVASTEDSSSSHITAAALAAKIPDSIISRGVQVLPRDTASLSTTPSESPRAQATSRLSTASCPTPKVQSRCSSKENILRASHSAVDITKVARRHRMSPFPLTSMDKAFITVLEMTPVLGTEIINYRDGMGRVLAQDVYAKDNLPPFPASVKDGYAVRAADGPGDRFIIGESQAGEQP…	lcl|GPHN_32:8-1894_ORF1_GPHN_32:7:1893	['GPHN_32_ORF1']
GPHN_33	ORF1	626	67.71	GPHN	E40	ATGGCCCTGGCAATG	ATGGCCCTGGCAATGCTGATGGGATCGCTCAATGTCACACCTCTGGGCATGCTCTCTAGACCAGTGTGTGGAATAAGGGGGAAAACTCTGATAATTAACCTACCTGGTAGCAAGAAAGGATCTCAGGAATGCTTTCAGTTCATACTGCCAGCTCTACCTCATGCCATTGACCTTTTACGTGATGCCATTGTAAAAGTAAAGGAGGTGCATGATGAACTTGAAGATTTACCTTCCCCACCACCTCCTCTCTCTCCACCTCCTACAACTAGCCCACATAAACAGACAGAAGACAAAGGAGTTCAGTGTGAAGAAGAGGAAGAAGAAAAGAAAGACAGTGGTGTAGCTTCAACAGAAGATAGTTCCTCATCACATATAACTGCAGCAGCTCTTGCTGCAAAG…	MALAMLMGSLNVTPLGMLSRPVCGIRGKTLIINLPGSKKGSQECFQFILPALPHAIDLLRDAIVKVKEVHDELEDLPSPPPPLSPPPTTSPHKQTEDKGVQCEEEEEEKKDSGVASTEDSSSSHITAAALAAKIPDSIISRGVQVLPRDTASLSTTPSESPRAQATSRLSTASCPTPKVQSRCSSKENILRASHSAVDITKVARRHRMSPFPLTSMDKAFITVLEMTPVLGTEIINYRDGMGRVLAQDVYAKDNLPPFPASVKDGYAVRAADGPGDRFIIGESQAGEQPTQTVMPGQVMRVTTGAPIPCGADAVVQVEDTELIRESDDGTEELEVRILVQARPGQDIRPIGHDIKRGECVLAKGTHMGPSEIGLLATVGVTEVEVNKFPVVAVMSTGNE…	lcl|GPHN_33:201-2081_ORF1_GPHN_33:200:2080	['GPHN_108_ORF1', 'GPHN_248_ORF1', 'GPHN_33_ORF1', 'GPHN_37_ORF1']
GPHN_34	ORF1	470	51.33	GPHN	E40	ATGGCGACCGAGGGA	ATGGCGACCGAGGGAATGATCCTCACCAACCACGACCATCAAATCCGTGTCGGAGTCCTCACAGTGAGTGATAGCTGCTTCAGGAATCTTGCAGAAGACCGCAGTGGGATAAATCTAAAAGATCTTGTCCAAGATCCTTCTTTGTTGGGTGGGACTATATCGGCATACAAGATAGTACCAGATGAAATAGAAGAAATCAAGGAAACACTCATAGACTGGTGTGATGAAAAGGAACTTAATTTAATATTAACAACTGGAGGAACGGGGTTTGCACCACGAGATGTCACTCCAGAGGCCACAAAAGAAGTAATAGAGCGGGAAGCGCCAGGGATGGCCCTGGCAATGCTGATGGGATCGCTCAATGTCACACCTCTGGGCATGCTCTCTAGACCAGTGTGT…	MATEGMILTNHDHQIRVGVLTVSDSCFRNLAEDRSGINLKDLVQDPSLLGGTISAYKIVPDEIEEIKETLIDWCDEKELNLILTTGGTGFAPRDVTPEATKEVIEREAPGMALAMLMGSLNVTPLGMLSRPVCGIRGKTLIINLPGSKKGSQECFQFILPALPHAIDLLRDAIVKVKEVHDELEDLPSPPPPLSPPPTTSPHKQTEDKGVQCEEEEEEKKDSGVASTEDSSSSHITAAALAAKLLNPEDDLLPGKIRDSNRSTLLATIQEHGYPTINLGIVGDNPDDLLNALNEGISRADVIITSGGVSMGEKDYLKQVLDIDLHAQIHFGRVFMKPGLPTTFATLDIDGVRKIIFALPGNPVSAVVTCNLFVVPALRKMQGILDPRPTIIKARLSCDV…	lcl|GPHN_34:8-1420_ORF1_GPHN_34:7:1419	['GPHN_34_ORF1']
GPHN_35	ORF1	559	61.12	GPHN	E40	ATGGCGACCGAGGGA	ATGGCGACCGAGGGAATGATCCTCACCAACCACGACCATCAAATCCGTGTCGGAGTCCTCACAGTGAGTGATAGCTGCTTCAGGAATCTTGCAGAAGACCGCAGTGGGATAAATCTAAAAGATCTTGTCCAAGATCCTTCTTTGTTGGGTGGGACTATATCGGCATACAAGATAGTACCAGATGAAATAGAAGAAATCAAGGAAACACTCATAGACTGGTGTGATGAAAAGGAACTTAATTTAATATTAACAACTGGAGGAACGGGGTTTGCACCACGAGATGTCACTCCAGAGAAATTCCCAACATTCCCATTTTGTGGGCTCCAGAAAGGGGTCCAGTCCAGGTGCAGCAGCAAGGAGAACATTCTAAGAGCCAGTCACAGTGCTGTAGATATCACC…	MATEGMILTNHDHQIRVGVLTVSDSCFRNLAEDRSGINLKDLVQDPSLLGGTISAYKIVPDEIEEIKETLIDWCDEKELNLILTTGGTGFAPRDVTPEKFPTFPFCGLQKGVQSRCSSKENILRASHSAVDITKVARRHRMSPFPLTSMDKAFITVLEMTPVLGTEIINYRDGMGRVLAQDVYAKDNLPPFPASVKDGYAVRAADGPGDRFIIGESQAGEQPTQTVMPGQVMRVTTGAPIPCGADAVVQVEDTELIRESDDGTEELEVRILVQARPGQDIRPIGHDIKRGECVLAKGTHMGPSEIGLLATVGVTEVEVNKFPVVAVMSTGNELLNPEDDLLPGKIRDSNRSTLLATIQEHGYPTINLGIVGDNPDDLLNALNEGISRADVIITSGGVSM…	lcl|GPHN_35:8-1687_ORF1_GPHN_35:7:1686	['GPHN_35_ORF1']
GPHN_36	ORF1	419	45.61	GPHN	E40	ATGTCTCCTTTTCCC	ATGTCTCCTTTTCCCCTGACGTCTATGGACAAAGCCTTCATTACAGTCCTGGAGATGACTCCGGTGCTTGGTACAGAAATCATCAATTACCGAGATGGAATGGGGCGAGTCCTTGCTCAAGATGTATATGCAAAAGACAACCTACCCCCATTCCCTGCATCAGTAAAAGATGGCTATGCTGTTCGAGCTGCTGATGGTCCAGGGGATCGTTTCATCATTGGGGAATCCCAAGCTGGTGAGCAGCCAACTCAGACAGTAATGCCAGGACAAGTGATGCGGGTTACAACAGGTGCTCCAATCCCCTGCGGTGCTGATGCAGTAGTGCAAGTTGAAGATACTGAACTCATCAGGGAATCAGATGATGGTACTGAAGAACTTGAAGTACGAATTCTGGTGCAA…	MSPFPLTSMDKAFITVLEMTPVLGTEIINYRDGMGRVLAQDVYAKDNLPPFPASVKDGYAVRAADGPGDRFIIGESQAGEQPTQTVMPGQVMRVTTGAPIPCGADAVVQVEDTELIRESDDGTEELEVRILVQARPGQDIRPIGHDIKRGECVLAKGTHMGPSEIGLLATVGVTEVEVNKFPVVAVMSTGNELLNPEDDLLPGKIRDSNRSTLLATIQEHGYPTINLGIVGDNPDDLLNALNEGISRADVIITSGGVSMGEKDYLKQVLDIDLHAQIHFGRVFMKPGLPTTFATLDIDGVRKIIFALPGNPVSAVVTCNLFVVPALRKMQGILDPRPTIIKARLSCDVKLDPRPEYHRCILTWHHQEPLPWAQSTGNQMSSRLMSMRSANGLLMLPPKT…	lcl|GPHN_36:424-1683_ORF1_GPHN_36:423:1682	['GPHN_110_ORF1', 'GPHN_15_ORF1', 'GPHN_173_ORF1', 'GPHN_192_ORF2', 'GPHN_209_ORF3', 'GPHN_227_ORF2', 'GPHN_228_ORF2', 'GPHN_257_ORF1', 'GPHN_264_ORF2', 'GPHN_265_ORF2', 'GPHN_268_ORF2', 'GPHN_30_ORF1', 'GPHN_36_ORF1', 'GPHN_52_ORF1', 'GPHN_80_ORF2']
GPHN_37	ORF1	626	67.71	GPHN	E40	ATGGCCCTGGCAATG	ATGGCCCTGGCAATGCTGATGGGATCGCTCAATGTCACACCTCTGGGCATGCTCTCTAGACCAGTGTGTGGAATAAGGGGGAAAACTCTGATAATTAACCTACCTGGTAGCAAGAAAGGATCTCAGGAATGCTTTCAGTTCATACTGCCAGCTCTACCTCATGCCATTGACCTTTTACGTGATGCCATTGTAAAAGTAAAGGAGGTGCATGATGAACTTGAAGATTTACCTTCCCCACCACCTCCTCTCTCTCCACCTCCTACAACTAGCCCACATAAACAGACAGAAGACAAAGGAGTTCAGTGTGAAGAAGAGGAAGAAGAAAAGAAAGACAGTGGTGTAGCTTCAACAGAAGATAGTTCCTCATCACATATAACTGCAGCAGCTCTTGCTGCAAAG…	MALAMLMGSLNVTPLGMLSRPVCGIRGKTLIINLPGSKKGSQECFQFILPALPHAIDLLRDAIVKVKEVHDELEDLPSPPPPLSPPPTTSPHKQTEDKGVQCEEEEEEKKDSGVASTEDSSSSHITAAALAAKIPDSIISRGVQVLPRDTASLSTTPSESPRAQATSRLSTASCPTPKVQSRCSSKENILRASHSAVDITKVARRHRMSPFPLTSMDKAFITVLEMTPVLGTEIINYRDGMGRVLAQDVYAKDNLPPFPASVKDGYAVRAADGPGDRFIIGESQAGEQPTQTVMPGQVMRVTTGAPIPCGADAVVQVEDTELIRESDDGTEELEVRILVQARPGQDIRPIGHDIKRGECVLAKGTHMGPSEIGLLATVGVTEVEVNKFPVVAVMSTGNE…	lcl|GPHN_37:108-1988_ORF1_GPHN_37:107:1987	['GPHN_108_ORF1', 'GPHN_248_ORF1', 'GPHN_33_ORF1', 'GPHN_37_ORF1']
GPHN_38	ORF1	785	85.13	GPHN	E40	ATGGCGACCGAGGGA	ATGGCGACCGAGGGAATGATCCTCACCAACCACGACCATCAAATCCGTGTCGGAGTCCTCACAGTGAGTGATAGCTGCTTCAGGAATCTTGCAGAAGACCGCAGTGGGATAAATCTAAAAGATCTTGTCCAAGATCCTTCTTTGTTGGGTGGGACTATATCGGCATACAAGATAGTACCAGATGAAATAGAAGAAATCAAGGAAACACTCATAGACTGGTGTGATGAAAAGGAACTTAATTTAATATTAACAACTGGAGGAACGGGGTTTGCACCACGAGATGTCACTCCAGAGAAATTCCCAACATTCCCATTTTGTGGGCTCCAGAAAGGGGCCACAAAAGAAGTAATAGAGCGGGAAGCGCCAGGGATGGCCCTGGCAATGCTGATGGGATCGCTC…	MATEGMILTNHDHQIRVGVLTVSDSCFRNLAEDRSGINLKDLVQDPSLLGGTISAYKIVPDEIEEIKETLIDWCDEKELNLILTTGGTGFAPRDVTPEKFPTFPFCGLQKGATKEVIEREAPGMALAMLMGSLNVTPLGMLSRPVCGIRGKTLIINLPGSKKGSQECFQFILPALPHAIDLLRDAIVKVKEVHDELEDLPSPPPPLSPPPTTSPHKQTEDKGVQCEEEEEEKKDSGVASTEDSSSSHITAAALAAKKHPFYTSPALFMANHGQPIPGLISYSHHATGSADKRIPDSIISRGVQVLPRDTASLSTTPSESPRAQATSRLSTASCPTPKVQSRCSSKENILRASHSAVDITKVARRHRMSPFPLTSMDKAFITVLEMTPVLGTEIINYRDG…	lcl|GPHN_38:8-2365_ORF1_GPHN_38:7:2364	['GPHN_38_ORF1']
	ORF2	100	11.18	unknown	PTC	CTGCAGCAGCTCTTG	CTGCAGCAGCTCTTGCTGCAAAGAAGCATCCATTCTACACCAGTCCTGCTCTTTTCATGGCAAATCATGGGCAGCCCATCCCTGGTCTCATCAGTTATTCCCATCATGCAACAGGCAGTGCAGATAAACGGATTCCAGACTCCATCATTTCTCGTGGTGTTCAGGTGCTCCCACGAGACACAGCCTCCCTTAGCACTACTCCTTCAGAATCGCCCCGTGCTCAGGCTACATCTCGCCTCTCTACAGCTTCTTGTCCAACACCAAAAGTCCAGTCCAGGTGCAGCAGCAAGGAGAACATTCTAA	MQQLLLQRSIHSTPVLLFSWQIMGSPSLVSSVIPIMQQAVQINGFQTPSFLVVFRCSHETQPPLALLLQNRPVLRLHLASLQLLVQHQKSSPGAAARRTF	lcl|GPHN_38:753-1055_ORF2_GPHN_38:752:1054	['GPHN_105_ORF2', 'GPHN_116_ORF1', 'GPHN_119_ORF1', 'GPHN_143_ORF2', 'GPHN_144_ORF2', 'GPHN_164_ORF1', 'GPHN_171_ORF2', 'GPHN_185_ORF2', 'GPHN_190_ORF2', 'GPHN_241_ORF2', 'GPHN_254_ORF2', 'GPHN_38_ORF2', 'GPHN_4_ORF2', 'GPHN_51_ORF2', 'GPHN_57_ORF2', 'GPHN_77_ORF2', 'GPHN_95_ORF1']
GPHN_39	ORF1	659	71.42	GPHN	E40	ATGGCGACCGAGGGA	ATGGCGACCGAGGGAATGATCCTCACCAACCACGACCATCAAATCCGTGTCGGAGTCCTCACAGTGAGTGATAGCTGCTTCAGGAATCTTGCAGAAGACCGCAGTGGGATAAATCTAAAAGATCTTGTCCAAGATCCTTCTTTGTTGGGTGGGACTATATCGGCATACAAGATAGTACCAGATGAAATAGAAGAAATCAAGGAAACACTCATAGACTGGTGTGATGAAAAGGAACTTAATTTAATATTAACAACTGGAGGAACGGGGTTTGCACCACGAGATGTCACTCCAGAGGCCACAAAAGAAGTAATAGAGCGGGAAGCGCCAGGGATGGCCCTGGCAATGCTGATGGGATCGCTCAATGTCACACCTCTGGGCATGCTCTCTAGACCAGTGTGT…	MATEGMILTNHDHQIRVGVLTVSDSCFRNLAEDRSGINLKDLVQDPSLLGGTISAYKIVPDEIEEIKETLIDWCDEKELNLILTTGGTGFAPRDVTPEATKEVIEREAPGMALAMLMGSLNVTPLGMLSRPVCGIRGKTLIINLPGSKKGSQIPDSIISRGVQVLPRDTASLSTTPSESPRAQATSRLSTASCPTPKARLPSCSSTYSVSEVQSRCSSKENILRASHSAVDITKVARRHRMSPFPLTSMDKAFITVLEMTPVLGTEIINYRDGMGRVLAQDVYAKDNLPPFPASVKDGYAVRAADGPGDRFIIGESQAGEQPTQTVMPGQVMRVTTGAPIPCGADAVVQVEDTELIRESDDGTEELEVRILVQARPGQDIRPIGHDIKRGECVLAKGTH…	lcl|GPHN_39:8-1987_ORF1_GPHN_39:7:1986	['GPHN_39_ORF1']
GPHN_40	ORF1	506	54.92	GPHN	E40	CTGATAATTAACCTA	CTGATAATTAACCTACCTGGTAGCAAGAAAGGATCTCAGATTCCAGACTCCATCATTTCTCGTGGTGTTCAGGTGCTCCCACGAGACACAGCCTCCCTTAGCACTACTCCTTCAGAATCGCCCCGTGCTCAGGCTACATCTCGCCTCTCTACAGCTTCTTGTCCAACACCAAAAGTCCAGTCCAGGTGCAGCAGCAAGGAGAACATTCTAAGAGCCAGTCACAGTGCTGTAGATATCACCAAGGTGGCTAGAAGACATCGCATGTCTCCTTTTCCCCTGACGTCTATGGACAAAGCCTTCATTACAGTCCTGGAGATGACTCCGGTGCTTGGTACAGAAATCATCAATTACCGAGATGGAATGGGGCGAGTCCTTGCTCAAGATGTATATGCAAAAGAC…	MIINLPGSKKGSQIPDSIISRGVQVLPRDTASLSTTPSESPRAQATSRLSTASCPTPKVQSRCSSKENILRASHSAVDITKVARRHRMSPFPLTSMDKAFITVLEMTPVLGTEIINYRDGMGRVLAQDVYAKDNLPPFPASVKDGYAVRAADGPGDRFIIGESQAGEQPTQTVMPGQVMRVTTGAPIPCGADAVVQVEDTELIRESDDGTEELEVRILVQARPGQDIRPIGHDIKRGECVLAKGTHMGPSEIGLLATVGVTEVEVNKFPVVAVMSTGNELLNPEDDLLPGKIRDSNRSTLLATIQEHGYPTINLGIVGDNPDDLLNALNEGISRADVIITSGGVSMGEKDYLKQVLDIDLHAQIHFGRVFMKPGLPTTFATLDIDGVRKIIFALPGNPV…	lcl|GPHN_40:100-1620_ORF1_GPHN_40:99:1619	['GPHN_40_ORF1']
GPHN_41	ORF1	770	83.82	GPHN	E40	ATGGCGACCGAGGGA	ATGGCGACCGAGGGAATGATCCTCACCAACCACGACCATCAAATCCGTGTCGGAGTCCTCACAGTGAGTGATAGCTGCTTCAGGAATCTTGCAGAAGACCGCAGTGGGATAAATCTAAAAGATCTTGTCCAAGATCCTTCTTTGTTGGGTGGGACTATATCGGCATACAAGATAGTACCAGATGAAATAGAAGAAATCAAGGAAACACTCATAGACTGGTGTGATGAAAAGGAACTTAATTTAATATTAACAACTGGAGGAACGGGGTTTGCACCACGAGATGTCACTCCAGAGAAATTCCCAACATTCCCATTTTGTGGGCTCCAGAAAGGGGCCACAAAAGAAGTAATAGAGCGGGAAGCGCCAGGGATGGCCCTGGCAATGCTGATGGGATCGCTC…	MATEGMILTNHDHQIRVGVLTVSDSCFRNLAEDRSGINLKDLVQDPSLLGGTISAYKIVPDEIEEIKETLIDWCDEKELNLILTTGGTGFAPRDVTPEKFPTFPFCGLQKGATKEVIEREAPGMALAMLMGSLNVTPLGMLSRPVCGIRGKTLIINLPGSKKGSQECFQFILPALPHAIDLLRDAIVKVKEVHDELEDLPSPPPPLSPPPTTSPHKQTEDKGVQCEEEEEEKKDSGVASTEDSSSSHITAAALAAKIPDSIISRGVQVLPRDTASLSTTPSESPRAQATSRLSTASCPTPKLHSRLEGLKDELWRNRGYDLRVQSRCSSKENILRASHSAVDITKVARRHRMSPFPLTSMDKAFITVLEMTPVLGTEIINYRDGMGRVLAQDVYAKDNL…	lcl|GPHN_41:8-2320_ORF1_GPHN_41:7:2319	['GPHN_41_ORF1']
GPHN_42	ORF1	669	72.16	GPHN	E40	ATGGCGACCGAGGGA	ATGGCGACCGAGGGAATGATCCTCACCAACCACGACCATCAAATCCGTGTCGGAGTCCTCACAGTGAGTGATAGCTGCTTCAGGAATCTTGCAGAAGACCGCAGTGGGATAAATCTAAAAGATCTTGTCCAAGATCCTTCTTTGTTGGGTGGGACTATATCGGCATACAAGATAGTACCAGATGAAATAGAAGAAATCAAGGAAACACTCATAGACTGGTGTGATGAAAAGGAACTTAATTTAATATTAACAACTGGAGGAACGGGGTTTGCACCACGAGATGTCACTCCAGAGGCCACAAAAGAAGTAATAGAGCGGGAAGCGCCAGGGATGGCCCTGGCAATGCTGATGGGATCGCTCAATGTCACACCTCTGGGCATGCTCTCTAGACCAGTGTGT…	MATEGMILTNHDHQIRVGVLTVSDSCFRNLAEDRSGINLKDLVQDPSLLGGTISAYKIVPDEIEEIKETLIDWCDEKELNLILTTGGTGFAPRDVTPEATKEVIEREAPGMALAMLMGSLNVTPLGMLSRPVCGIRGKTLIINLPGSKKGSQECFQFILPALPHAIDLLRDAIVKVKEVHDELEDLPSPPPPLSPPPTTSPHKQTEDKGVQCEEEEEEKKDSGVASTEDSSSSHITAAALAAKIPDSIISRGVQVLPRDTASLSTTPSESPRAQATSRLSTASCPTPKVQSRCSSKENILRASHSAVDITKVARRHRMSPFPLTSMDKAFITVLEMTPVLGTEIINYRDGMGRVLAQDVYAKDNLPPFPASVKDGYAVRAADGPGDRFIIGESQAGEQP…	lcl|GPHN_42:8-2017_ORF1_GPHN_42:7:2016	['GPHN_42_ORF1']
GPHN_43	ORF1	641	68.88	GPHN	PTC	ATGGCGACCGAGGGA	ATGGCGACCGAGGGAATGATCCTCACCAACCACGACCATCAAATCCGTGTCGGAGTCCTCACAGTGAGTGATAGCTGCTTCAGGAATCTTGCAGAAGACCGCAGTGGGATAAATCTAAAAGATCTTGTCCAAGATCCTTCTTTGTTGGGTGGGACTATATCGGCATACAAGATAGTACCAGATGAAATAGAAGAAATCAAGGAAACACTCATAGACTGGTGTGATGAAAAGGAACTTAATTTAATATTAACAACTGGAGGAACGGGGTTTGCACCACGAGATGTCACTCCAGAGGCCACAAAAGAAGTAATAGAGCGGGAAGCGCCAGGGATGGCCCTGGCAATGCTGATGGGATCGCTCAATGTCACACCTCTGGGCATGCTCTCTAGACCAGTGTGT…	MATEGMILTNHDHQIRVGVLTVSDSCFRNLAEDRSGINLKDLVQDPSLLGGTISAYKIVPDEIEEIKETLIDWCDEKELNLILTTGGTGFAPRDVTPEATKEVIEREAPGMALAMLMGSLNVTPLGMLSRPVCGIRGKTLIINLPGSKKGSQECFQFILPALPHAIDLLRDAIVKVKEVHDELEDLPSPPPPLSPPPTTSPHKQTEDKGVQCEEEEEEKKDSGVASTEDSSSSHITAAALAAKIPDSIISRGVQVLPRDTASLSTTPSESPRAQATSRLSTASCPTPKVQSRCSSKENILRASHSAVDITKVARRHRMSPFPLTSMDKAFITVLEMTPVLGTEIINYRDGMGRVLAQDVYAKDNLPPFPASVKDGYAVRAADGPGDRFIIGESQAGEQP…	lcl|GPHN_43:8-1933_ORF1_GPHN_43:7:1932	['GPHN_43_ORF1']
GPHN_44	ORF1	529	57.46	GPHN	E40	ATGGCGACCGAGGGA	ATGGCGACCGAGGGAATGATCCTCACCAACCACGACCATCAAATCCGTGTCGGAGTCCTCACAGTGAGTGATAGCTGCTTCAGGAATCTTGCAGAAGACCGCAGTGGGATAAATCTAAAAGATCTTGTCCAAGATCCTTCTTTGTTGGGTGGGACTATATCGGCATACAAGATAGTACCAGATGAAATAGAAGAAATCAAGGAAACACTCATAGACTGGTGTGATGAAAAGGAACTTAATTTAATATTAACAACTGGAGGAACGGGGTTTGCACCACGAGATGTCACTCCAGAGGCCACAAAAGAAGTAATAGAGCGGGAAGCGCCAGGGATGGCCCTGGCAATGCTGATGGGATCGCTCAATGTCACACCTCTGGGCATGCTCTCTAGACCAGTGTGT…	MATEGMILTNHDHQIRVGVLTVSDSCFRNLAEDRSGINLKDLVQDPSLLGGTISAYKIVPDEIEEIKETLIDWCDEKELNLILTTGGTGFAPRDVTPEATKEVIEREAPGMALAMLMGSLNVTPLGMLSRPVCGIRGKTLIINLPGSKKGSQECFQFILPALPHAIDLLRDAIVKVKEVHDELEDLPSPPPPLSPPPTTSPHKQTEDKGVQCEEEEEEKKDSGVASTEDSSSSHITAAALAAKIPDSIISRGVQVLPRDTASLSTTPSESPRAQATSRLSTASCPTPKARLPSCSSTYSVSELLNPEDDLLPGKIRDSNRSTLLATIQEHGYPTINLGIVGDNPDDLLNALNEGISRADVIITSGGVSMGEKDYLKQVLDIDLHAQIHFGRVFMKPGLP…	lcl|GPHN_44:8-1597_ORF1_GPHN_44:7:1596	['GPHN_44_ORF1']
GPHN_45	ORF1	546	59.67	GPHN	E40	ATGGCGACCGAGGGA	ATGGCGACCGAGGGAATGATCCTCACCAACCACGACCATCAAATCCGTGTCGGAGTCCTCACAGTGAGTGATAGCTGCTTCAGGAATCTTGCAGAAGACCGCAGTGGGATAAATCTAAAAGATCTTGTCCAAGATCCTTCTTTGTTGGGTGGGACTATATCGGCATACAAGATAGTACCAGATGAAATAGAAGAAATCAAGGAAACACTCATAGACTGGTGTGATGAAAAGGAACTTAATTTAATATTAACAACTGGAGGAACGGGGTTTGCACCACGAGATGTCACTCCAGAGGTCCAGTCCAGGTGCAGCAGCAAGGAGAACATTCTAAGAGCCAGTCACAGTGCTGTAGATATCACCAAGGTGGCTAGAAGACATCGCATGTCTCCTTTTCCCCTG…	MATEGMILTNHDHQIRVGVLTVSDSCFRNLAEDRSGINLKDLVQDPSLLGGTISAYKIVPDEIEEIKETLIDWCDEKELNLILTTGGTGFAPRDVTPEVQSRCSSKENILRASHSAVDITKVARRHRMSPFPLTSMDKAFITVLEMTPVLGTEIINYRDGMGRVLAQDVYAKDNLPPFPASVKDGYAVRAADGPGDRFIIGESQAGEQPTQTVMPGQVMRVTTGAPIPCGADAVVQVEDTELIRESDDGTEELEVRILVQARPGQDIRPIGHDIKRGECVLAKGTHMGPSEIGLLATVGVTEVEVNKFPVVAVMSTGNELLNPEDDLLPGKIRDSNRSTLLATIQEHGYPTINLGIVGDNPDDLLNALNEGISRADVIITSGGVSMGEKDYLKQVLDID…	lcl|GPHN_45:8-1648_ORF1_GPHN_45:7:1647	['GPHN_45_ORF1']
GPHN_46	ORF1	626	67.74	GPHN	E40	ATGGCGACCGAGGGA	ATGGCGACCGAGGGAATGATCCTCACCAACCACGACCATCAAATCCGTGTCGGAGTCCTCACAGTGAGTGATAGCTGCTTCAGGAATCTTGCAGAAGACCGCAGTGGGATAAATCTAAAAGATCTTGTCCAAGATCCTTCTTTGTTGGGTGGGACTATATCGGCATACAAGATAGTACCAGATGAAATAGAAGAAATCAAGGAAACACTCATAGACTGGTGTGATGAAAAGGAACTTAATTTAATATTAACAACTGGAGGAACGGGGTTTGCACCACGAGATGTCACTCCAGAGGCCACAAAAGAAGTAATAGAGCGGGAAGCGCCAGGGATGGCCCTGGCAATGCTGATGGGATCGCTCAATGTCACACCTCTGGGCATGCTCTCTAGACCAGTGTGT…	MATEGMILTNHDHQIRVGVLTVSDSCFRNLAEDRSGINLKDLVQDPSLLGGTISAYKIVPDEIEEIKETLIDWCDEKELNLILTTGGTGFAPRDVTPEATKEVIEREAPGMALAMLMGSLNVTPLGMLSRPVCGIRGKTLIINLPGSKKGSQECFQFILPALPHAIDLLRDAIVKVKEVHDELEDLPSPPPPLSPPPTTSPHKQTEDKGVQCEEEEEEKKDSGVASTEDSSSSHITAAALAAKIPDSIISRGVQVLPRDTASLSTTPSESPRAQATSRLSTASCPTPKPTQTVMPGQVMRVTTGAPIPCGADAVVQVEDTELIRESDDGTEELEVRILVQARPGQDIRPIGHDIKRGECVLAKGTHMGPSEIGLLATVGVTEVEVNKFPVVAVMSTGNE…	lcl|GPHN_46:8-1888_ORF1_GPHN_46:7:1887	['GPHN_46_ORF1']
GPHN_47	ORF1	515	56.25	GPHN	E40	ATGGCGACCGAGGGA	ATGGCGACCGAGGGAATGATCCTCACCAACCACGACCATCAAATCCGTGTCGGAGTCCTCACAGTGAGTGATAGCTGCTTCAGGAATCTTGCAGAAGACCGCAGTGGGATAAATCTAAAAGATCTTGTCCAAGATCCTTCTTTGTTGGGTGGGACTATATCGGCATACAAGATAGTACCAGATGAAATAGAAGAAATCAAGGTCCAGTCCAGGTGCAGCAGCAAGGAGAACATTCTAAGAGCCAGTCACAGTGCTGTAGATATCACCAAGGTGGCTAGAAGACATCGCATGTCTCCTTTTCCCCTGACGTCTATGGACAAAGCCTTCATTACAGTCCTGGAGATGACTCCGGTGCTTGGTACAGAAATCATCAATTACCGAGATGGAATGGGGCGAGTC…	MATEGMILTNHDHQIRVGVLTVSDSCFRNLAEDRSGINLKDLVQDPSLLGGTISAYKIVPDEIEEIKVQSRCSSKENILRASHSAVDITKVARRHRMSPFPLTSMDKAFITVLEMTPVLGTEIINYRDGMGRVLAQDVYAKDNLPPFPASVKDGYAVRAADGPGDRFIIGESQAGEQPTQTVMPGQVMRVTTGAPIPCGADAVVQVEDTELIRESDDGTEELEVRILVQARPGQDIRPIGHDIKRGECVLAKGTHMGPSEIGLLATVGVTEVEVNKFPVVAVMSTGNELLNPEDDLLPGKIRDSNRSTLLATIQEHGYPTINLGIVGDNPDDLLNALNEGISRADVIITSGGVSMGEKDYLKQVLDIDLHAQIHFGRVFMKPGLPTTFATLDIDGVRKI…	lcl|GPHN_47:8-1555_ORF1_GPHN_47:7:1554	['GPHN_47_ORF1']
GPHN_48	ORF1	803	87.54	GPHN	E40	ATGGCGACCGAGGGA	ATGGCGACCGAGGGAATGATCCTCACCAACCACGACCATCAAATCCGTGTCGGAGTCCTCACAGTGAGTGATAGCTGCTTCAGGAATCTTGCAGAAGACCGCAGTGGGATAAATCTAAAAGATCTTGTCCAAGATCCTTCTTTGTTGGGTGGGACTATATCGGCATACAAGATAGTACCAGATGAAATAGAAGAAATCAAGGAAACACTCATAGACTGGTGTGATGAAAAGGAACTTAATTTAATATTAACAACTGGAGGAACGGGGTTTGCACCACGAGATGTCACTCCAGAGAAATTCCCAACATTCCCATTTTGTGGGCTCCAGAAAGGGGCCACAAAAGAAGTAATAGAGCGGGAAGCGCCAGGGATGGCCCTGGCAATGCTGATGGGATCGCTC…	MATEGMILTNHDHQIRVGVLTVSDSCFRNLAEDRSGINLKDLVQDPSLLGGTISAYKIVPDEIEEIKETLIDWCDEKELNLILTTGGTGFAPRDVTPEKFPTFPFCGLQKGATKEVIEREAPGMALAMLMGSLNVTPLGMLSRPVCGIRGKTLIINLPGSKKGSQECFQFILPALPHAIDLLRDAIVKVKEVHDELEDLPSPPPPLSPPPTTSPHKQTEDKGVQCEEEEEEKKDSGVASTEDSSSSHITAAALAAKIPDSIISRGVQVLPRDTASLSTTPSESPRAQATSRLSTASCPTPKQIRRPDESKGVASRVGSLKYLLSLGDFVHKTFKLHSRLEGLKDELWRNRGYDLRVQSRCSSKENILRASHSAVDITKVARRHRMSPFPLTSMDKAFIT…	lcl|GPHN_48:8-2419_ORF1_GPHN_48:7:2418	['GPHN_48_ORF1']
	ORF2	105	12.21	unknown	PTC	CTGCAGCAGCTCTTG	CTGCAGCAGCTCTTGCTGCAAAGATTCCAGACTCCATCATTTCTCGTGGTGTTCAGGTGCTCCCACGAGACACAGCCTCCCTTAGCACTACTCCTTCAGAATCGCCCCGTGCTCAGGCTACATCTCGCCTCTCTACAGCTTCTTGTCCAACACCAAAACAAATTAGACGGCCGGATGAAAGCAAAGGAGTTGCTAGTAGAGTTGGATCCCTCAAATATCTATTATCACTGGGAGATTTTGTACATAAAACATTTAAGCTCCACTCTAGATTGGAAGGGCTTAAAGATGAACTCTGGAGGAATAGAGGCTACGACTTAA	MQQLLLQRFQTPSFLVVFRCSHETQPPLALLLQNRPVLRLHLASLQLLVQHQNKLDGRMKAKELLVELDPSNIYYHWEILYIKHLSSTLDWKGLKMNSGGIEATT	lcl|GPHN_48:753-1070_ORF2_GPHN_48:752:1069	['GPHN_103_ORF2', 'GPHN_12_ORF2', 'GPHN_178_ORF2', 'GPHN_180_ORF1', 'GPHN_263_ORF2', 'GPHN_273_ORF2', 'GPHN_48_ORF2']
GPHN_49	ORF1	528	57.45	GPHN	E40	ATGGCGACCGAGGGA	ATGGCGACCGAGGGAATGATCCTCACCAACCACGACCATCAAATCCGTGTCGGAGTCCTCACAGTGAGTGATAGCTGCTTCAGGAATCTTGCAGAAGACCGCAGTGGGATAAATCTAAAAGATCTTGTCCAAGATCCTTCTTTGTTGGGTGGGACTATATCGGCATACAAGATAGTACCAGATGAAATAGAAGAAATCAAGGAAACACTCATAGACTGGTGTGATGAAAAGGAACTTAATTTAATATTAACAACTGGAGGAACGGGGTTTGCACCACGAGATGTCACTCCAGAGAAATTCCCAACATTCCCATTTTGTGGGCTCCAGAAAGGGGCCACAAAAGAAGTAATAGAGCGGGAAGCGCCAGGGATGGCCCTGGCAATGCTGATGGGATCGCTC…	MATEGMILTNHDHQIRVGVLTVSDSCFRNLAEDRSGINLKDLVQDPSLLGGTISAYKIVPDEIEEIKETLIDWCDEKELNLILTTGGTGFAPRDVTPEKFPTFPFCGLQKGATKEVIEREAPGMALAMLMGSLNVTPLGMLSRPVCGIRGKTLIINLPGSKKGSQECFQFILPALPHAIDLLRDAIVKVKEVHDELEDLPSPPPPLSPPPTTSPHKQTEDKGVQCEEEEEEKKDSGVASTEDSSSSHITAAALAAKIPDSIISRGVQVLPRDTASLSTTPSESPRAQATSRLSTASCPTPKLLNPEDDLLPGKIRDSNRSTLLATIQEHGYPTINLGIVGDNPDDLLNALNEGISRADVIITSGGVSMGEKDYLKQVLDIDLHAQIHFGRVFMKPGLPT…	lcl|GPHN_49:8-1594_ORF1_GPHN_49:7:1593	['GPHN_49_ORF1']
GPHN_50	ORF1	727	79.01	GPHN	E40	ATGGCGACCGAGGGA	ATGGCGACCGAGGGAATGATCCTCACCAACCACGACCATCAAATCCGTGTCGGAGTCCTCACAGTGAGTGATAGCTGCTTCAGGAATCTTGCAGAAGACCGCAGTGGGATAAATCTAAAAGATCTTGTCCAAGATCCTTCTTTGTTGGGTGGGACTATATCGGCATACAAGATAGTACCAGATGAAATAGAAGAAATCAAGGAAACACTCATAGACTGGTGTGATGAAAAGGAACTTAATTTAATATTAACAACTGGAGGAACGGGGTTTGCACCACGAGATGTCACTCCAGAGGCCACAAAAGAAGTAATAGAGCGGGAAGCGCCAGGGATGGCCCTGGCAATGCTGATGGGATCGCTCAATGTCACACCTCTGGGCATGCTCTCTAGACCAGTGTGT…	MATEGMILTNHDHQIRVGVLTVSDSCFRNLAEDRSGINLKDLVQDPSLLGGTISAYKIVPDEIEEIKETLIDWCDEKELNLILTTGGTGFAPRDVTPEATKEVIEREAPGMALAMLMGSLNVTPLGMLSRPVCGIRGKTLIINLPGSKKGSQECFQFILPALPHAIDLLRDAIVKVKEVHDELEDLPSPPPPLSPPPTTSPHKQTEDKGVQCEEEEEEKKDSGVASTEDSSSSHITAAALAAKKHPFYTSPALFMANHGQPIPGLISYSHHATGSADKRVQSRCSSKENILRASHSAVDITKVARRHRMSPFPLTSMDKAFITVLEMTPVLGTEIINYRDGMGRVLAQDVYAKDNLPPFPASVKDGYAVRAADGPGDRFIIGESQAGEQPTQTVMPGQV…	lcl|GPHN_50:8-2191_ORF1_GPHN_50:7:2190	['GPHN_50_ORF1']
GPHN_51	ORF1	741	80.26	GPHN	E40	ATGGCGACCGAGGGA	ATGGCGACCGAGGGAATGATCCTCACCAACCACGACCATCAAATCCGTGTCGGAGTCCTCACAGTGAGTGATAGCTGCTTCAGGAATCTTGCAGAAGACCGCAGTGGGATAAATCTAAAAGATCTTGTCCAAGATCCTTCTTTGTTGGGTGGGACTATATCGGCATACAAGATAGTACCAGATGAAATAGAAGAAATCAAGGCCACAAAAGAAGTAATAGAGCGGGAAGCGCCAGGGATGGCCCTGGCAATGCTGATGGGATCGCTCAATGTCACACCTCTGGGCATGCTCTCTAGACCAGTGTGTGGAATAAGGGGGAAAACTCTGATAATTAACCTACCTGGTAGCAAGAAAGGATCTCAGGAATGCTTTCAGTTCATACTGCCAGCTCTACCTCAT…	MATEGMILTNHDHQIRVGVLTVSDSCFRNLAEDRSGINLKDLVQDPSLLGGTISAYKIVPDEIEEIKATKEVIEREAPGMALAMLMGSLNVTPLGMLSRPVCGIRGKTLIINLPGSKKGSQECFQFILPALPHAIDLLRDAIVKVKEVHDELEDLPSPPPPLSPPPTTSPHKQTEDKGVQCEEEEEEKKDSGVASTEDSSSSHITAAALAAKKHPFYTSPALFMANHGQPIPGLISYSHHATGSADKRIPDSIISRGVQVLPRDTASLSTTPSESPRAQATSRLSTASCPTPKVQSRCSSKENILRASHSAVDITKVARRHRMSPFPLTSMDKAFITVLEMTPVLGTEIINYRDGMGRVLAQDVYAKDNLPPFPASVKDGYAVRAADGPGDRFIIGESQ…	lcl|GPHN_51:8-2233_ORF1_GPHN_51:7:2232	['GPHN_51_ORF1']
	ORF2	100	11.18	unknown	PTC	CTGCAGCAGCTCTTG	CTGCAGCAGCTCTTGCTGCAAAGAAGCATCCATTCTACACCAGTCCTGCTCTTTTCATGGCAAATCATGGGCAGCCCATCCCTGGTCTCATCAGTTATTCCCATCATGCAACAGGCAGTGCAGATAAACGGATTCCAGACTCCATCATTTCTCGTGGTGTTCAGGTGCTCCCACGAGACACAGCCTCCCTTAGCACTACTCCTTCAGAATCGCCCCGTGCTCAGGCTACATCTCGCCTCTCTACAGCTTCTTGTCCAACACCAAAAGTCCAGTCCAGGTGCAGCAGCAAGGAGAACATTCTAA	MQQLLLQRSIHSTPVLLFSWQIMGSPSLVSSVIPIMQQAVQINGFQTPSFLVVFRCSHETQPPLALLLQNRPVLRLHLASLQLLVQHQKSSPGAAARRTF	lcl|GPHN_51:621-923_ORF2_GPHN_51:620:922	['GPHN_105_ORF2', 'GPHN_116_ORF1', 'GPHN_119_ORF1', 'GPHN_143_ORF2', 'GPHN_144_ORF2', 'GPHN_164_ORF1', 'GPHN_171_ORF2', 'GPHN_185_ORF2', 'GPHN_190_ORF2', 'GPHN_241_ORF2', 'GPHN_254_ORF2', 'GPHN_38_ORF2', 'GPHN_4_ORF2', 'GPHN_51_ORF2', 'GPHN_57_ORF2', 'GPHN_77_ORF2', 'GPHN_95_ORF1']
GPHN_52	ORF1	419	45.61	GPHN	E40	ATGTCTCCTTTTCCC	ATGTCTCCTTTTCCCCTGACGTCTATGGACAAAGCCTTCATTACAGTCCTGGAGATGACTCCGGTGCTTGGTACAGAAATCATCAATTACCGAGATGGAATGGGGCGAGTCCTTGCTCAAGATGTATATGCAAAAGACAACCTACCCCCATTCCCTGCATCAGTAAAAGATGGCTATGCTGTTCGAGCTGCTGATGGTCCAGGGGATCGTTTCATCATTGGGGAATCCCAAGCTGGTGAGCAGCCAACTCAGACAGTAATGCCAGGACAAGTGATGCGGGTTACAACAGGTGCTCCAATCCCCTGCGGTGCTGATGCAGTAGTGCAAGTTGAAGATACTGAACTCATCAGGGAATCAGATGATGGTACTGAAGAACTTGAAGTACGAATTCTGGTGCAA…	MSPFPLTSMDKAFITVLEMTPVLGTEIINYRDGMGRVLAQDVYAKDNLPPFPASVKDGYAVRAADGPGDRFIIGESQAGEQPTQTVMPGQVMRVTTGAPIPCGADAVVQVEDTELIRESDDGTEELEVRILVQARPGQDIRPIGHDIKRGECVLAKGTHMGPSEIGLLATVGVTEVEVNKFPVVAVMSTGNELLNPEDDLLPGKIRDSNRSTLLATIQEHGYPTINLGIVGDNPDDLLNALNEGISRADVIITSGGVSMGEKDYLKQVLDIDLHAQIHFGRVFMKPGLPTTFATLDIDGVRKIIFALPGNPVSAVVTCNLFVVPALRKMQGILDPRPTIIKARLSCDVKLDPRPEYHRCILTWHHQEPLPWAQSTGNQMSSRLMSMRSANGLLMLPPKT…	lcl|GPHN_52:253-1512_ORF1_GPHN_52:252:1511	['GPHN_110_ORF1', 'GPHN_15_ORF1', 'GPHN_173_ORF1', 'GPHN_192_ORF2', 'GPHN_209_ORF3', 'GPHN_227_ORF2', 'GPHN_228_ORF2', 'GPHN_257_ORF1', 'GPHN_264_ORF2', 'GPHN_265_ORF2', 'GPHN_268_ORF2', 'GPHN_30_ORF1', 'GPHN_36_ORF1', 'GPHN_52_ORF1', 'GPHN_80_ORF2']
GPHN_53	ORF1	763	82.68	GPHN	E40	ATGGCGACCGAGGGA	ATGGCGACCGAGGGAATGATCCTCACCAACCACGACCATCAAATCCGTGTCGGAGTCCTCACAGTGAGTGATAGCTGCTTCAGGAATCTTGCAGAAGACCGCAGTGGGATAAATCTAAAAGATCTTGTCCAAGATCCTTCTTTGTTGGGTGGGACTATATCGGCATACAAGATAGTACCAGATGAAATAGAAGAAATCAAGGAAACACTCATAGACTGGTGTGATGAAAAGGAACTTAATTTAATATTAACAACTGGAGGAACGGGGTTTGCACCACGAGATGTCACTCCAGAGAAATTCCCAACATTCCCATTTTGTGGGCTCCAGAAAGGGGCCACAAAAGAAGTAATAGAGCGGGAAGCGCCAGGGATGGCCCTGGCAATGCTGATGGGATCGCTC…	MATEGMILTNHDHQIRVGVLTVSDSCFRNLAEDRSGINLKDLVQDPSLLGGTISAYKIVPDEIEEIKETLIDWCDEKELNLILTTGGTGFAPRDVTPEKFPTFPFCGLQKGATKEVIEREAPGMALAMLMGSLNVTPLGMLSRPVCGIRGKTLIINLPGSKKGSQECFQFILPALPHAIDLLRDAIVKVKEVHDELEDLPSPPPPLSPPPTTSPHKQTEDKGVQCEEEEEEKKDSGVASTEDSSSSHITAAALAAKIPDSIISRGVQVLPRDTASLSTTPSESPRAQATSRLSTASCPTPKARLPSCSSTYSVSEVQSRCSSKENILRASHSAVDITKVARRHRMSPFPLTSMDKAFITVLEMTPVLGTEIINYRDGMGRVLAQDVYAKDNLPPFPASV…	lcl|GPHN_53:8-2299_ORF1_GPHN_53:7:2298	['GPHN_53_ORF1']
GPHN_54	ORF1	333	36.35	GPHN	E40	ATGCCAGGACAAGTG	ATGCCAGGACAAGTGATGCGGGTTACAACAGGTGCTCCAATCCCCTGCGGTGCTGATGCAGTAGTGCAAGTTGAAGATACTGAACTCATCAGGGAATCAGATGATGGTACTGAAGAACTTGAAGTACGAATTCTGGTGCAAGCTCGGCCAGGCCAAGATATCCGACCCATCGGCCATGACATTAAGAGAGGGGAGTGTGTTTTGGCCAAAGGAACCCATATGGGCCCTTCAGAGATTGGTCTCCTTGCAACTGTGGGTGTCACAGAAGTGGAAGTTAATAAGTTTCCAGTGGTTGCCGTTATGTCAACAGGGAATGAGCTGCTAAATCCTGAAGATGATCTCTTACCAGGAAAGATTCGGGACAGCAATCGATCAACACTTCTAGCAACAATTCAGGAA…	MPGQVMRVTTGAPIPCGADAVVQVEDTELIRESDDGTEELEVRILVQARPGQDIRPIGHDIKRGECVLAKGTHMGPSEIGLLATVGVTEVEVNKFPVVAVMSTGNELLNPEDDLLPGKIRDSNRSTLLATIQEHGYPTINLGIVGDNPDDLLNALNEGISRADVIITSGGVSMGEKDYLKQVLDIDLHAQIHFGRVFMKPGLPTTFATLDIDGVRKIIFALPGNPVSAVVTCNLFVVPALRKMQGILDPRPTIIKARLSCDVKLDPRPEYHRCILTWHHQEPLPWAQSTGNQMSSRLMSMRSANGLLMLPPKTEQYVELHKGEVVDVMVIGRL	lcl|GPHN_54:87-1088_ORF1_GPHN_54:86:1087	['GPHN_54_ORF1']
GPHN_55	ORF1	154	16.6	GPHN	PTC	ATGGCGACCGAGGGA	ATGGCGACCGAGGGAATGATCCTCACCAACCACGACCATCAAATCCGTGTCGGAGTCCTCACAGTGAGTGATAGCTGCTTCAGGAATCTTGCAGAAGACCGCAGTGGGATAAATCTAAAAGATCTTGTCCAAGATCCTTCTTTGTTGGGTGGGACTATATCGGCATACAAGATAGTACCAGATGAAATAGAAGAAATCAAGGAAACACTCATAGACTGGTGTGATGAAAAGGAACTTAATTTAATATTAACAACTGGAGGAACGGGGTTTGCACCACGAGATGTCACTCCAGAGGCCACAAAAGAAGTAATAGAGCGGGAAGCGCCAGGGATGGCCCTGGCAATGCTGATGGGATCGCTCAATGTCACACCTCTGGGCATGCTCTCTAGACCAGTGTGT…	MATEGMILTNHDHQIRVGVLTVSDSCFRNLAEDRSGINLKDLVQDPSLLGGTISAYKIVPDEIEEIKETLIDWCDEKELNLILTTGGTGFAPRDVTPEATKEVIEREAPGMALAMLMGSLNVTPLGMLSRPVCGIRGKTLIINLPGSKKGSQPT	lcl|GPHN_55:8-472_ORF1_GPHN_55:7:471	['GPHN_104_ORF1', 'GPHN_119_ORF2', 'GPHN_169_ORF2', 'GPHN_209_ORF1', 'GPHN_55_ORF1', 'GPHN_80_ORF1']
	ORF2	544	59.01	GPHN	E40	CTGGTAGCAAGAAAG	CTGGTAGCAAGAAAGGATCTCAGCCCACATAAACAGACAGAAGACAAAGGAGTTCAGTGTGAAGAAGAGGAAGAAGAAAAGAAAGACAGTGGTGTAGCTTCAACAGAAGATAGTTCCTCATCACATATAACTGCAGCAGCTCTTGCTGCAAAGATTCCAGACTCCATCATTTCTCGTGGTGTTCAGGTGCTCCCACGAGACACAGCCTCCCTTAGCACTACTCCTTCAGAATCGCCCCGTGCTCAGGCTACATCTCGCCTCTCTACAGCTTCTTGTCCAACACCAAAAGTCCAGTCCAGGTGCAGCAGCAAGGAGAACATTCTAAGAGCCAGTCACAGTGCTGTAGATATCACCAAGGTGGCTAGAAGACATCGCATGTCTCCTTTTCCCCTGACGTCT…	MVARKDLSPHKQTEDKGVQCEEEEEEKKDSGVASTEDSSSSHITAAALAAKIPDSIISRGVQVLPRDTASLSTTPSESPRAQATSRLSTASCPTPKVQSRCSSKENILRASHSAVDITKVARRHRMSPFPLTSMDKAFITVLEMTPVLGTEIINYRDGMGRVLAQDVYAKDNLPPFPASVKDGYAVRAADGPGDRFIIGESQAGEQPTQTVMPGQVMRVTTGAPIPCGADAVVQVEDTELIRESDDGTEELEVRILVQARPGQDIRPIGHDIKRGECVLAKGTHMGPSEIGLLATVGVTEVEVNKFPVVAVMSTGNELLNPEDDLLPGKIRDSNRSTLLATIQEHGYPTINLGIVGDNPDDLLNALNEGISRADVIITSGGVSMGEKDYLKQVLDIDLH…	lcl|GPHN_55:441-2075_ORF2_GPHN_55:440:2074	['GPHN_160_ORF1', 'GPHN_166_ORF1', 'GPHN_183_ORF2', 'GPHN_196_ORF2', 'GPHN_261_ORF2', 'GPHN_55_ORF2']
GPHN_56	ORF1	614	66.53	GPHN	E40	ATGGCGACCGAGGGA	ATGGCGACCGAGGGAATGATCCTCACCAACCACGACCATCAAATCCGTGTCGGAGTCCTCACAGTGAGTGATAGCTGCTTCAGGAATCTTGCAGAAGACCGCAGTGGGATAAATCTAAAAGATCTTGTCCAAGATCCTTCTTTGTTGGGTGGGACTATATCGGCATACAAGATAGTACCAGATGAAATAGAAGAAATCAAGGCCACAAAAGAAGTAATAGAGCGGGAAGCGCCAGGGATGGCCCTGGCAATGCTGATGGGATCGCTCAATGTCACACCTCTGGGCATGCTCTCTAGACCAGTGTGTGGAATAAGGGGGAAAACTCTGATAATTAACCTACCTGGTAGCAAGAAAGGATCTCAGATTCCAGACTCCATCATTTCTCGTGGTGTTCAGGTG…	MATEGMILTNHDHQIRVGVLTVSDSCFRNLAEDRSGINLKDLVQDPSLLGGTISAYKIVPDEIEEIKATKEVIEREAPGMALAMLMGSLNVTPLGMLSRPVCGIRGKTLIINLPGSKKGSQIPDSIISRGVQVLPRDTASLSTTPSESPRAQATSRLSTASCPTPKVQSRCSSKENILRASHSAVDITKVARRHRMSPFPLTSMDKAFITVLEMTPVLGTEIINYRDGMGRVLAQDVYAKDNLPPFPASVKDGYAVRAADGPGDRFIIGESQAGEQPTQTVMPGQVMRVTTGAPIPCGADAVVQVEDTELIRESDDGTEELEVRILVQARPGQDIRPIGHDIKRGECVLAKGTHMGPSEIGLLATVGVTEVEVNKFPVVAVMSTGNELLNPEDDLLPGK…	lcl|GPHN_56:8-1852_ORF1_GPHN_56:7:1851	['GPHN_56_ORF1']
GPHN_57	ORF1	518	56.19	GPHN	E40	ATGGCAAATCATGGG	ATGGCAAATCATGGGCAGCCCATCCCTGGTCTCATCAGTTATTCCCATCATGCAACAGGCAGTGCAGATAAACGGATTCCAGACTCCATCATTTCTCGTGGTGTTCAGGTGCTCCCACGAGACACAGCCTCCCTTAGCACTACTCCTTCAGAATCGCCCCGTGCTCAGGCTACATCTCGCCTCTCTACAGCTTCTTGTCCAACACCAAAAGTCCAGTCCAGGTGCAGCAGCAAGGAGAACATTCTAAGAGCCAGTCACAGTGCTGTAGATATCACCAAGGTGGCTAGAAGACATCGCATGTCTCCTTTTCCCCTGACGTCTATGGACAAAGCCTTCATTACAGTCCTGGAGATGACTCCGGTGCTTGGTACAGAAATCATCAATTACCGAGATGGAATG…	MANHGQPIPGLISYSHHATGSADKRIPDSIISRGVQVLPRDTASLSTTPSESPRAQATSRLSTASCPTPKVQSRCSSKENILRASHSAVDITKVARRHRMSPFPLTSMDKAFITVLEMTPVLGTEIINYRDGMGRVLAQDVYAKDNLPPFPASVKDGYAVRAADGPGDRFIIGESQAGEQPTQTVMPGQVMRVTTGAPIPCGADAVVQVEDTELIRESDDGTEELEVRILVQARPGQDIRPIGHDIKRGECVLAKGTHMGPSEIGLLATVGVTEVEVNKFPVVAVMSTGNELLNPEDDLLPGKIRDSNRSTLLATIQEHGYPTINLGIVGDNPDDLLNALNEGISRADVIITSGGVSMGEKDYLKQVLDIDLHAQIHFGRVFMKPGLPTTFATLDIDGV…	lcl|GPHN_57:235-1791_ORF1_GPHN_57:234:1790	['GPHN_57_ORF1']
	ORF2	100	11.18	unknown	PTC	CTGCAGCAGCTCTTG	CTGCAGCAGCTCTTGCTGCAAAGAAGCATCCATTCTACACCAGTCCTGCTCTTTTCATGGCAAATCATGGGCAGCCCATCCCTGGTCTCATCAGTTATTCCCATCATGCAACAGGCAGTGCAGATAAACGGATTCCAGACTCCATCATTTCTCGTGGTGTTCAGGTGCTCCCACGAGACACAGCCTCCCTTAGCACTACTCCTTCAGAATCGCCCCGTGCTCAGGCTACATCTCGCCTCTCTACAGCTTCTTGTCCAACACCAAAAGTCCAGTCCAGGTGCAGCAGCAAGGAGAACATTCTAA	MQQLLLQRSIHSTPVLLFSWQIMGSPSLVSSVIPIMQQAVQINGFQTPSFLVVFRCSHETQPPLALLLQNRPVLRLHLASLQLLVQHQKSSPGAAARRTF	lcl|GPHN_57:179-481_ORF2_GPHN_57:178:480	['GPHN_105_ORF2', 'GPHN_116_ORF1', 'GPHN_119_ORF1', 'GPHN_143_ORF2', 'GPHN_144_ORF2', 'GPHN_164_ORF1', 'GPHN_171_ORF2', 'GPHN_185_ORF2', 'GPHN_190_ORF2', 'GPHN_241_ORF2', 'GPHN_254_ORF2', 'GPHN_38_ORF2', 'GPHN_4_ORF2', 'GPHN_51_ORF2', 'GPHN_57_ORF2', 'GPHN_77_ORF2', 'GPHN_95_ORF1']
GPHN_58	ORF1	804	87.55	GPHN	E40	ATGGCGACCGAGGGA	ATGGCGACCGAGGGAATGATCCTCACCAACCACGACCATCAAATCCGTGTCGGAGTCCTCACAGTGAGTGATAGCTGCTTCAGGAATCTTGCAGAAGACCGCAGTGGGATAAATCTAAAAGATCTTGTCCAAGATCCTTCTTTGTTGGGTGGGACTATATCGGCATACAAGATAGTACCAGATGAAATAGAAGAAATCAAGGAAACACTCATAGACTGGTGTGATGAAAAGGAACTTAATTTAATATTAACAACTGGAGGAACGGGGTTTGCACCACGAGATGTCACTCCAGAGGCCACAAAAGAAGTAATAGAGCGGGAAGCGCCAGGGATGGCCCTGGCAATGCTGATGGGATCGCTCAATGTCACACCTCTGGGCATGCTCTCTAGACCAGTGTGT…	MATEGMILTNHDHQIRVGVLTVSDSCFRNLAEDRSGINLKDLVQDPSLLGGTISAYKIVPDEIEEIKETLIDWCDEKELNLILTTGGTGFAPRDVTPEATKEVIEREAPGMALAMLMGSLNVTPLGMLSRPVCGIRGKTLIINLPGSKKGSQECFQFILPALPHAIDLLRDAIVKVKEVHDELEDLPSPPPPLSPPPTTSPHKQTEDKGVQCEEEEEEKKDSGVASTEDSSSSHITAAALAAKIPDSIISRGVQVLPRDTASLSTTPSESPRAQATSRLSTASCPTPKQIRRPDESKGVASRVGSLKYLLSLGDFVHKTFKARLPSCSSTYSVSELHSRLEGLKDELWRNRGYDLRVQSRCSSKENILRASHSAVDITKVARRHRMSPFPLTSMDKAFI…	lcl|GPHN_58:8-2422_ORF1_GPHN_58:7:2421	['GPHN_58_ORF1']
	ORF2	119	13.9	unknown	PTC	CTGCAGCAGCTCTTG	CTGCAGCAGCTCTTGCTGCAAAGATTCCAGACTCCATCATTTCTCGTGGTGTTCAGGTGCTCCCACGAGACACAGCCTCCCTTAGCACTACTCCTTCAGAATCGCCCCGTGCTCAGGCTACATCTCGCCTCTCTACAGCTTCTTGTCCAACACCAAAACAAATTAGACGGCCGGATGAAAGCAAAGGAGTTGCTAGTAGAGTTGGATCCCTCAAATATCTATTATCACTGGGAGATTTTGTACATAAAACATTTAAGGCTCGGCTTCCGTCGTGCTCATCTACCTATAGTGTATCTGAGCTCCACTCTAGATTGGAAGGGCTTAAAGATGAACTCTGGAGGAATAGAGGCTACGACTTAA	MQQLLLQRFQTPSFLVVFRCSHETQPPLALLLQNRPVLRLHLASLQLLVQHQNKLDGRMKAKELLVELDPSNIYYHWEILYIKHLRLGFRRAHLPIVYLSSTLDWKGLKMNSGGIEATT	lcl|GPHN_58:714-1073_ORF2_GPHN_58:713:1072	['GPHN_162_ORF2', 'GPHN_58_ORF2', 'GPHN_98_ORF2']
GPHN_59	ORF1	718	77.79	GPHN	E40	ATGGCGACCGAGGGA	ATGGCGACCGAGGGAATGATCCTCACCAACCACGACCATCAAATCCGTGTCGGAGTCCTCACAGTGAGTGATAGCTGCTTCAGGAATCTTGCAGAAGACCGCAGTGGGATAAATCTAAAAGATCTTGTCCAAGATCCTTCTTTGTTGGGTGGGACTATATCGGCATACAAGATAGTACCAGATGAAATAGAAGAAATCAAGAAATTCCCAACATTCCCATTTTGTGGGCTCCAGAAAGGGGCCACAAAAGAAGTAATAGAGCGGGAAGCGCCAGGGATGGCCCTGGCAATGCTGATGGGATCGCTCAATGTCACACCTCTGGGCATGCTCTCTAGACCAGTGTGTGGAATAAGGGGGAAAACTCTGATAATTAACCTACCTGGTAGCAAGAAAGGATCT…	MATEGMILTNHDHQIRVGVLTVSDSCFRNLAEDRSGINLKDLVQDPSLLGGTISAYKIVPDEIEEIKKFPTFPFCGLQKGATKEVIEREAPGMALAMLMGSLNVTPLGMLSRPVCGIRGKTLIINLPGSKKGSQECFQFILPALPHAIDLLRDAIVKVKEVHDELEDLPSPPPPLSPPPTTSPHKQTEDKGVQCEEEEEEKKDSGVASTEDSSSSHITAAALAAKIPDSIISRGVQVLPRDTASLSTTPSESPRAQATSRLSTASCPTPKVQSRCSSKENILRASHSAVDITKVARRHRMSPFPLTSMDKAFITVLEMTPVLGTEIINYRDGMGRVLAQDVYAKDNLPPFPASVKDGYAVRAADGPGDRFIIGESQAGEQPTQTVMPGQVMRVTTGAPI…	lcl|GPHN_59:8-2164_ORF1_GPHN_59:7:2163	['GPHN_59_ORF1']
GPHN_60	ORF1	641	69.03	GPHN	PTC	ATGGCGACCGAGGGA	ATGGCGACCGAGGGAATGATCCTCACCAACCACGACCATCAAATCCGTGTCGGAGTCCTCACAGTGAGTGATAGCTGCTTCAGGAATCTTGCAGAAGACCGCAGTGGGATAAATCTAAAAGATCTTGTCCAAGATCCTTCTTTGTTGGGTGGGACTATATCGGCATACAAGATAGTACCAGATGAAATAGAAGAAATCAAGGAAACACTCATAGACTGGTGTGATGAAAAGGAACTTAATTTAATATTAACAACTGGAGGAACGGGGTTTGCACCACGAGATGTCACTCCAGAGAAATTCCCAACATTCCCATTTTGTGGGCTCCAGAAAGGGGCCACAAAAGAAGTAATAGAGCGGGAAGCGCCAGGGATGGCCCTGGCAATGCTGATGGGATCGCTC…	MATEGMILTNHDHQIRVGVLTVSDSCFRNLAEDRSGINLKDLVQDPSLLGGTISAYKIVPDEIEEIKETLIDWCDEKELNLILTTGGTGFAPRDVTPEKFPTFPFCGLQKGATKEVIEREAPGMALAMLMGSLNVTPLGMLSRPVCGIRGKTLIINLPGSKKGSQECFQFILPALPHAIDLLRDAIVKVKEVHDELEDLPSPPPPLSPPPTTSPHKQTEDKGVQCEEEEEEKKDSGVASTEDSSSSHITAAALAAKIPDSIISRGVQVLPRDTASLSTTPSESPRAQATSRLSTASCPTPKVQSRCSSKENILRASHSAVDITKVARRHRMSPFPLTSMDKAFITVLEMTPVLGTEIINYRDGMGRVLAQDVYAKDNLPPFPASVKDGYAVRAADGPGD…	lcl|GPHN_60:8-1933_ORF1_GPHN_60:7:1932	['GPHN_60_ORF1']
GPHN_61	ORF1	691	75.12	GPHN	E40	ATGGCGACCGAGGGA	ATGGCGACCGAGGGAATGATCCTCACCAACCACGACCATCAAATCCGTGTCGGAGTCCTCACAGTGAGTGATAGCTGCTTCAGGAATCTTGCAGAAGACCGCAGTGGGATAAATCTAAAAGATCTTGTCCAAGATCCTTCTTTGTTGGGTGGGACTATATCGGCATACAAGATAGTACCAGATGAAATAGAAGAAATCAAGGAAACACTCATAGACTGGTGTGATGAAAAGGAACTTAATTTAATATTAACAACTGGAGGAACGGGGTTTGCACCACGAGATGTCACTCCAGAGAAATTCCCAACATTCCCATTTTGTGGGCTCCAGAAAGGGGCCACAAAAGAAGTAATAGAGCGGGAAGCGCCAGGGATGGCCCTGGCAATGCTGATGGGATCGCTC…	MATEGMILTNHDHQIRVGVLTVSDSCFRNLAEDRSGINLKDLVQDPSLLGGTISAYKIVPDEIEEIKETLIDWCDEKELNLILTTGGTGFAPRDVTPEKFPTFPFCGLQKGATKEVIEREAPGMALAMLMGSLNVTPLGMLSRPVCGIRGKTLIINLPGSKKGSQIPDSIISRGVQVLPRDTASLSTTPSESPRAQATSRLSTASCPTPKQIRRPDESKGVASRVGSLKYLLSLGDFVHKTFKVQSRCSSKENILRASHSAVDITKVARRHRMSPFPLTSMDKAFITVLEMTPVLGTEIINYRDGMGRVLAQDVYAKDNLPPFPASVKDGYAVRAADGPGDRFIIGESQAGEQPTQTVMPGQVMRVTTGAPIPCGADAVVQVEDTELIRESDDGTEELE…	lcl|GPHN_61:8-2083_ORF1_GPHN_61:7:2082	['GPHN_61_ORF1']
GPHN_62	ORF1	110	12.12	GPHN	PTC	ATGGCGACCGAGGGA	ATGGCGACCGAGGGAATGATCCTCACCAACCACGACCATCAAATCCGTGTCGGAGTCCTCACAGTGAGTGATAGCTGCTTCAGGAATCTTGCAGAAGACCGCAGTGGGATAAATCTAAAAGATCTTGTCCAAGATCCTTCTTTGTTGGGTGGGACTATATCGGCATACAAGATAGTACCAGATGAAATAGAAGAAATCAAGGAAACACTCATAGACTGGTGTGATGAAAAGGAACTTAATTTAATATTAACAACTGGAGGAACGGGGTTTGCACCACGAGATGTCACTCCAGAGACCAGTGTGTGGAATAAGGGGGAAAACTCTGATAATTAA	MATEGMILTNHDHQIRVGVLTVSDSCFRNLAEDRSGINLKDLVQDPSLLGGTISAYKIVPDEIEEIKETLIDWCDEKELNLILTTGGTGFAPRDVTPETSVWNKGENSDN	lcl|GPHN_62:8-340_ORF1_GPHN_62:7:339	['GPHN_160_ORF2', 'GPHN_164_ORF2', 'GPHN_174_ORF1', 'GPHN_192_ORF1', 'GPHN_62_ORF1']
	ORF2	620	67.36	GPHN	E40	CTGGAGGAACGGGGT	CTGGAGGAACGGGGTTTGCACCACGAGATGTCACTCCAGAGACCAGTGTGTGGAATAAGGGGGAAAACTCTGATAATTAACCTACCTGGTAGCAAGAAAGGATCTCAGGAATGCTTTCAGTTCATACTGCCAGCTCTACCTCATGCCATTGACCTTTTACGTGATGCCATTGTAAAAGTAAAGGAGGTGCATGATGAACTTGAAGATTTACCTTCCCCACCACCTCCTCTCTCTCCACCTCCTACAACTAGCCCACATAAACAGACAGAAGACAAAGGAGTTCAGTGTGAAGAAGAGGAAGAAGAAAAGAAAGACAGTGGTGTAGCTTCAACAGAAGATAGTTCCTCATCACATATAACTGCAGCAGCTCTTGCTGCAAAGATTCCAGACTCCATCATT…	MEERGLHHEMSLQRPVCGIRGKTLIINLPGSKKGSQECFQFILPALPHAIDLLRDAIVKVKEVHDELEDLPSPPPPLSPPPTTSPHKQTEDKGVQCEEEEEEKKDSGVASTEDSSSSHITAAALAAKIPDSIISRGVQVLPRDTASLSTTPSESPRAQATSRLSTASCPTPKVQSRCSSKENILRASHSAVDITKVARRHRMSPFPLTSMDKAFITVLEMTPVLGTEIINYRDGMGRVLAQDVYAKDNLPPFPASVKDGYAVRAADGPGDRFIIGESQAGEQPTQTVMPGQVMRVTTGAPIPCGADAVVQVEDTELIRESDDGTEELEVRILVQARPGQDIRPIGHDIKRGECVLAKGTHMGPSEIGLLATVGVTEVEVNKFPVVAVMSTGNELLNPED…	lcl|GPHN_62:261-2123_ORF2_GPHN_62:260:2122	['GPHN_62_ORF2']
GPHN_63	ORF1	658	71.37	GPHN	E40	ATGGCGACCGAGGGA	ATGGCGACCGAGGGAATGATCCTCACCAACCACGACCATCAAATCCGTGTCGGAGTCCTCACAGTGAGTGATAGCTGCTTCAGGAATCTTGCAGAAGACCGCAGTGGGATAAATCTAAAAGATCTTGTCCAAGATCCTTCTTTGTTGGGTGGGACTATATCGGCATACAAGATAGTACCAGATGAAATAGAAGAAATCAAGGAAACACTCATAGACTGGTGTGATGAAAAGGAACTTAATTTAATATTAACAACTGGAGGAACGGGGTTTGCACCACGAGATGTCACTCCAGAGGCCACAAAAGAAGTAATAGAGCGGGAAGCGCCAGGGATGGCCCTGGCAATGCTGATGGGATCGCTCAATGTCACACCTCTGGGCATGCTCTCTAGACCAGTGTGT…	MATEGMILTNHDHQIRVGVLTVSDSCFRNLAEDRSGINLKDLVQDPSLLGGTISAYKIVPDEIEEIKETLIDWCDEKELNLILTTGGTGFAPRDVTPEATKEVIEREAPGMALAMLMGSLNVTPLGMLSRPVCGIRGKTLIINLPGSKKGSQIPDSIISRGVQVLPRDTASLSTTPSESPRAQATSRLSTASCPTPKVQSRCSSKENILRASLNLKDLAFSRISGHSAVDITKVARRHRMSPFPLTSMDKAFITVLEMTPVLGTEIINYRDGMGRVLAQDVYAKDNLPPFPASVKDGYAVRAADGPGDRFIIGESQAGEQPTQTVMPGQVMRVTTGAPIPCGADAVVQVEDTELIRESDDGTEELEVRILVQARPGQDIRPIGHDIKRGECVLAKGTHM…	lcl|GPHN_63:8-1984_ORF1_GPHN_63:7:1983	['GPHN_63_ORF1']
GPHN_64	ORF1	227	25.15	GPHN	E40	CTGCTAAATCCTGAA	CTGCTAAATCCTGAAGATGATCTCTTACCAGGAAAGATTCGGGACAGCAATCGATCAACACTTCTAGCAACAATTCAGGAACATGGTTACCCAACAATCAACCTGGGAATTGTAGGAGACAACCCAGATGACTTACTCAATGCCTTGAATGAGGGTATCAGCCGTGCTGATGTCATCATCACGTCAGGAGGTGTGTCCATGGGGGAAAAGGACTATCTCAAGCAGGTGCTGGACATTGATCTTCATGCTCAGATCCATTTTGGCAGAGTTTTTATGAAGCCAGGCTTGCCAACAACATTTGCAACTTTGGATATTGATGGTGTAAGAAAAATTATTTTTGCACTACCAGGGAATCCTGTATCAGCTGTGGTCACCTGCAACCTCTTTGTTGTACCTGCA…	MLNPEDDLLPGKIRDSNRSTLLATIQEHGYPTINLGIVGDNPDDLLNALNEGISRADVIITSGGVSMGEKDYLKQVLDIDLHAQIHFGRVFMKPGLPTTFATLDIDGVRKIIFALPGNPVSAVVTCNLFVVPALRKMQGILDPRPTIIKARLSCDVKLDPRPEYHRCILTWHHQEPLPWAQSTGNQMSSRLMSMRSANGLLMLPPKTEQYVELHKGEVVDVMVIGRL	lcl|GPHN_64:1381-2064_ORF1_GPHN_64:1380:2063	['GPHN_104_ORF2', 'GPHN_186_ORF1', 'GPHN_195_ORF3', 'GPHN_197_ORF2', 'GPHN_247_ORF1', 'GPHN_255_ORF1', 'GPHN_275_ORF2', 'GPHN_64_ORF1', 'GPHN_88_ORF1']
	ORF2	459	49.47	GPHN	PTC	ATGGCGACCGAGGGA	ATGGCGACCGAGGGAATGATCCTCACCAACCACGACCATCAAATCCGTGTCGGAGTCCTCACAGTGAGTGATAGCTGCTTCAGGAATCTTGCAGAAGACCGCAGTGGGATAAATCTAAAAGATCTTGTCCAAGATCCTTCTTTGTTGGGTGGGACTATATCGGCATACAAGATAGTACCAGATGAAATAGAAGAAATCAAGGAAACACTCATAGACTGGTGTGATGAAAAGGAACTTAATTTAATATTAACAACTGGAGGAACGGGGTTTGCACCACGAGATGTCACTCCAGAGGCCACAAAAGAAGTAATAGAGCGGGAAGCGCCAGGGATGGCCCTGGCAATGCTGATGGGATCGCTCAATGTCACACCTCTGGGCATGCTCTCTAGACCAGTGTGT…	MATEGMILTNHDHQIRVGVLTVSDSCFRNLAEDRSGINLKDLVQDPSLLGGTISAYKIVPDEIEEIKETLIDWCDEKELNLILTTGGTGFAPRDVTPEATKEVIEREAPGMALAMLMGSLNVTPLGMLSRPVCGIRGKTLIINLPGSKKGSQECFQFILPALPHAIDLLRDAIVKVKEVHDELEDLPSPPPPLSPPPTTSPHKQTEDKGVQCEEEEEEKKDSGVASTEDSSSSHITAAALAAKIPDSIISRGVQVLPRDTASLSTTPSESPRAQATSRLSTASCPTPKVQSRCSSKENILRASHSAVDITKVARRHRMSPFPLTSMDKAFITVLEMTPVLGTEIINYRDGMGRVLAQDVYAKDNLPPFPASVKDGYAVRAADGPGDRFIIGESQAGEQP…	lcl|GPHN_64:8-1387_ORF2_GPHN_64:7:1386	['GPHN_64_ORF2', 'GPHN_89_ORF2']
GPHN_65	ORF1	424	46.19	GPHN	E40	ATGGCGACCGAGGGA	ATGGCGACCGAGGGAATGATCCTCACCAACCACGACCATCAAATCCGTGTCGGAGTCCTCACAGTGAGTGATAGCTGCTTCAGGAATCTTGCAGAAGACCGCAGTGGGATAAATCTAAAAGATCTTGTCCAAGATCCTTCTTTGTTGGGTGGGACTATATCGGCATACAAGATAGTACCAGATGAAATAGAAGAAATCAAGGAAACACTCATAGACTGGTGTGATGAAAAGGAACTTAATTTAATATTAACAACTGGAGGAACGGGGTTTGCACCACGAGATGTCACTCCAGAGGCCACAAAAGAAGTAATAGAGCGGGAAGCGCCAGGGATGGCCCTGGCAATGCTGATGGGATCGCTCAATGTCACACCTCTGGGCATGCTCTCTAGACCAGTGTGT…	MATEGMILTNHDHQIRVGVLTVSDSCFRNLAEDRSGINLKDLVQDPSLLGGTISAYKIVPDEIEEIKETLIDWCDEKELNLILTTGGTGFAPRDVTPEATKEVIEREAPGMALAMLMGSLNVTPLGMLSRPVCGIRGKTLIINLPGSKKGSQIPDSIISRGVQVLPRDTASLSTTPSESPRAQATSRLSTASCPTPKLLNPEDDLLPGKIRDSNRSTLLATIQEHGYPTINLGIVGDNPDDLLNALNEGISRADVIITSGGVSMGEKDYLKQVLDIDLHAQIHFGRVFMKPGLPTTFATLDIDGVRKIIFALPGNPVSAVVTCNLFVVPALRKMQGILDPRPTIIKARLSCDVKLDPRPEYHRCILTWHHQEPLPWAQSTGNQMSSRLMSMRSANGLLM…	lcl|GPHN_65:8-1282_ORF1_GPHN_65:7:1281	['GPHN_65_ORF1']
GPHN_66	ORF1	597	64.73	GPHN	E40	CTGATAATTAACCTA	CTGATAATTAACCTACCTGGTAGCAAGAAAGGATCTCAGGAATGCTTTCAGTTCATACTGCCAGCTCTACCTCATGCCATTGACCTTTTACGTGATGCCATTGTAAAAGTAAAGGAGGTGCATGATGAACTTGAAGATTTACCTTCCCCACCACCTCCTCTCTCTCCACCTCCTACAACTAGCCCACATAAACAGACAGAAGACAAAGGAGTTCAGTGTGAAGAAGAGGAAGAAGAAAAGAAAGACAGTGGTGTAGCTTCAACAGAAGATAGTTCCTCATCACATATAACTGCAGCAGCTCTTGCTGCAAAGATTCCAGACTCCATCATTTCTCGTGGTGTTCAGGTGCTCCCACGAGACACAGCCTCCCTTAGCACTACTCCTTCAGAATCGCCCCGT…	MIINLPGSKKGSQECFQFILPALPHAIDLLRDAIVKVKEVHDELEDLPSPPPPLSPPPTTSPHKQTEDKGVQCEEEEEEKKDSGVASTEDSSSSHITAAALAAKIPDSIISRGVQVLPRDTASLSTTPSESPRAQATSRLSTASCPTPKVQSRCSSKENILRASHSAVDITKVARRHRMSPFPLTSMDKAFITVLEMTPVLGTEIINYRDGMGRVLAQDVYAKDNLPPFPASVKDGYAVRAADGPGDRFIIGESQAGEQPTQTVMPGQVMRVTTGAPIPCGADAVVQVEDTELIRESDDGTEELEVRILVQARPGQDIRPIGHDIKRGECVLAKGTHMGPSEIGLLATVGVTEVEVNKFPVVAVMSTGNELLNPEDDLLPGKIRDSNRSTLLATIQEHG…	lcl|GPHN_66:100-1893_ORF1_GPHN_66:99:1892	['GPHN_66_ORF1']
GPHN_67	ORF1	439	47.89	GPHN	E40	TTGTCCAACACCAAA	TTGTCCAACACCAAAAGTCACAGTGCTGTAGATATCACCAAGGTGGCTAGAAGACATCGCATGTCTCCTTTTCCCCTGACGTCTATGGACAAAGCCTTCATTACAGTCCTGGAGATGACTCCGGTGCTTGGTACAGAAATCATCAATTACCGAGATGGAATGGGGCGAGTCCTTGCTCAAGATGTATATGCAAAAGACAACCTACCCCCATTCCCTGCATCAGTAAAAGATGGCTATGCTGTTCGAGCTGCTGATGGTCCAGGGGATCGTTTCATCATTGGGGAATCCCAAGCTGGTGAGCAGCCAACTCAGACAGTAATGCCAGGACAAGTGATGCGGGTTACAACAGGTGCTCCAATCCCCTGCGGTGCTGATGCAGTAGTGCAAGTTGAAGATACT…	MSNTKSHSAVDITKVARRHRMSPFPLTSMDKAFITVLEMTPVLGTEIINYRDGMGRVLAQDVYAKDNLPPFPASVKDGYAVRAADGPGDRFIIGESQAGEQPTQTVMPGQVMRVTTGAPIPCGADAVVQVEDTELIRESDDGTEELEVRILVQARPGQDIRPIGHDIKRGECVLAKGTHMGPSEIGLLATVGVTEVEVNKFPVVAVMSTGNELLNPEDDLLPGKIRDSNRSTLLATIQEHGYPTINLGIVGDNPDDLLNALNEGISRADVIITSGGVSMGEKDYLKQVLDIDLHAQIHFGRVFMKPGLPTTFATLDIDGVRKIIFALPGNPVSAVVTCNLFVVPALRKMQGILDPRPTIIKARLSCDVKLDPRPEYHRCILTWHHQEPLPWAQSTGNQM…	lcl|GPHN_67:583-1902_ORF1_GPHN_67:582:1901	['GPHN_100_ORF1', 'GPHN_101_ORF1', 'GPHN_151_ORF1', 'GPHN_17_ORF1', 'GPHN_182_ORF2', 'GPHN_244_ORF1', 'GPHN_67_ORF1']
	ORF2	201	21.48	GPHN	PTC	ATGGCGACCGAGGGA	ATGGCGACCGAGGGAATGATCCTCACCAACCACGACCATCAAATCCGTGTCGGAGTCCTCACAGTGAGTGATAGCTGCTTCAGGAATCTTGCAGAAGACCGCAGTGGGATAAATCTAAAAGATCTTGTCCAAGATCCTTCTTTGTTGGGTGGGACTATATCGGCATACAAGATAGTACCAGATGAAATAGAAGAAATCAAGGAAACACTCATAGACTGGTGTGATGAAAAGGAACTTAATTTAATATTAACAACTGGAGGAACGGGGTTTGCACCACGAGATGTCACTCCAGAGGCCACAAAAGAAGTAATAGAGCGGGAAGCGCCAGGGATGGCCCTGGCAATGCTGATGGGATCGCTCAATGTCACACCTCTGGGCATGCTCTCTAGACCAGTGTGT…	MATEGMILTNHDHQIRVGVLTVSDSCFRNLAEDRSGINLKDLVQDPSLLGGTISAYKIVPDEIEEIKETLIDWCDEKELNLILTTGGTGFAPRDVTPEATKEVIEREAPGMALAMLMGSLNVTPLGMLSRPVCGIRGKTLIINLPGSKKGSQIPDSIISRGVQVLPRDTASLSTTPSESPRAQATSRLSTASCPTPKVTVL	lcl|GPHN_67:8-613_ORF2_GPHN_67:7:612	['GPHN_67_ORF2']
GPHN_68	ORF1	704	76.55	GPHN	E40	ATGGCGACCGAGGGA	ATGGCGACCGAGGGAATGATCCTCACCAACCACGACCATCAAATCCGTGTCGGAGTCCTCACAGTGAGTGATAGCTGCTTCAGGAATCTTGCAGAAGACCGCAGTGGGATAAATCTAAAAGATCTTGTCCAAGATCCTTCTTTGTTGGGTGGGACTATATCGGCATACAAGATAGTACCAGATGAAATAGAAGAAATCAAGGAAACACTCATAGACTGGTGTGATGAAAAGGAACTTAATTTAATATTAACAACTGGAGGAACGGGGTTTGCACCACGAGATGTCACTCCAGAGAAATTCCCAACATTCCCATTTTGTGGGCTCCAGAAAGGGGCCACAAAAGAAGTAATAGAGCGGGAAGCGCCAGGGATGGCCCTGGCAATGCTGATGGGATCGCTC…	MATEGMILTNHDHQIRVGVLTVSDSCFRNLAEDRSGINLKDLVQDPSLLGGTISAYKIVPDEIEEIKETLIDWCDEKELNLILTTGGTGFAPRDVTPEKFPTFPFCGLQKGATKEVIEREAPGMALAMLMGSLNVTPLGMLSRPVCGIRGKTLIINLPGSKKGSQECFQFILPALPHAIDLLRDAIVKVKEVHDELEDLPSPPPPLSPPPTTSPHKQTEDKGVQCEEEEEEKKDSGVASTEDSSSSHITAAALAAKVQSRCSSKENILRASHSAVDITKVARRHRMSPFPLTSMDKAFITVLEMTPVLGTEIINYRDGMGRVLAQDVYAKDNLPPFPASVKDGYAVRAADGPGDRFIIGESQAGEQPTQTVMPGQVMRVTTGAPIPCGADAVVQVEDTE…	lcl|GPHN_68:8-2122_ORF1_GPHN_68:7:2121	['GPHN_68_ORF1']
GPHN_69	ORF1	442	47.62	GPHN	E40	ATGGCGACCGAGGGA	ATGGCGACCGAGGGAATGATCCTCACCAACCACGACCATCAAATCCGTGTCGGAGTCCTCACAGTGAGTGATAGCTGCTTCAGGAATCTTGCAGAAGACCGCAGTGGGATAAATCTAAAAGATCTTGTCCAAGATCCTTCTTTGTTGGGTGGGACTATATCGGCATACAAGATAGTACCAGATGAAATAGAAGAAATCAAGGAAACACTCATAGACTGGTGTGATGAAAAGGAACTTAATTTAATATTAACAACTGGAGGAACGGGGTTTGCACCACGAGATGTCACTCCAGAGGCCACAAAAGAAGTAATAGAGCGGGAAGCGCCAGGGATGGCCCTGGCAATGCTGATGGGATCGCTCAATGTCACACCTCTGGGCATGCTCTCTAGACCAGTGTGT…	MATEGMILTNHDHQIRVGVLTVSDSCFRNLAEDRSGINLKDLVQDPSLLGGTISAYKIVPDEIEEIKETLIDWCDEKELNLILTTGGTGFAPRDVTPEATKEVIEREAPGMALAMLMGSLNVTPLGMLSRPVCGIRGKTLIINLPGSKKGSQECFQFILPALPHAIDLLRDAIVKVKEVHDELEDLPSPPPPLSPPPTTSPHKQTEDKGVQCEEEEEEKKDSGVASTEDSSSSHITAAALAAKIPDSIISRGVQVLPRDTASLSTTPSESPRAQATSRLSTASCPTPKLLNPEDDLLPGKIRDSNRSTLLATIQEHGYPTINLGIVGDNPDDLLNALNEGISRADVIITSGGVSMGEKDYLKQVLDIDLHAQIHFGRVFMKPGLPTTFATLDIDGVRKI…	lcl|GPHN_69:8-1336_ORF1_GPHN_69:7:1335	['GPHN_69_ORF1']
GPHN_70	ORF1	604	65.78	GPHN	E40	ATGGCGACCGAGGGA	ATGGCGACCGAGGGAATGATCCTCACCAACCACGACCATCAAATCCGTGTCGGAGTCCTCACAGTGAGTGATAGCTGCTTCAGGAATCTTGCAGAAGACCGCAGTGGGATAAATCTAAAAGATCTTGTCCAAGATCCTTCTTTGTTGGGTGGGACTATATCGGCATACAAGATAGTACCAGATGAAATAGAAGAAATCAAGGAAACACTCATAGACTGGTGTGATGAAAAGGAACTTAATTTAATATTAACAACTGGAGGAACGGGGTTTGCACCACGAGATGTCACTCCAGAGAAATTCCCAACATTCCCATTTTGTGGGCTCCAGAAAGGGATTCCAGACTCCATCATTTCTCGTGGTGTTCAGGTGCTCCCACGAGACACAGCCTCCCTTAGCACT…	MATEGMILTNHDHQIRVGVLTVSDSCFRNLAEDRSGINLKDLVQDPSLLGGTISAYKIVPDEIEEIKETLIDWCDEKELNLILTTGGTGFAPRDVTPEKFPTFPFCGLQKGIPDSIISRGVQVLPRDTASLSTTPSESPRAQATSRLSTASCPTPKVQSRCSSKENILRASHSAVDITKVARRHRMSPFPLTSMDKAFITVLEMTPVLGTEIINYRDGMGRVLAQDVYAKDNLPPFPASVKDGYAVRAADGPGDRFIIGESQAGEQPTQTVMPGQVMRVTTGAPIPCGADAVVQVEDTELIRESDDGTEELEVRILVQARPGQDIRPIGHDIKRGECVLAKGTHMGPSEIGLLATVGVTEVEVNKFPVVAVMSTGNELLNPEDDLLPGKIRDSNRSTLL…	lcl|GPHN_70:8-1822_ORF1_GPHN_70:7:1821	['GPHN_70_ORF1']
GPHN_71	ORF1	437	47.64	GPHN	E40	ATGGCGACCGAGGGA	ATGGCGACCGAGGGAATGATCCTCACCAACCACGACCATCAAATCCGTGTCGGAGTCCTCACAGTGAGTGATAGCTGCTTCAGGAATCTTGCAGAAGACCGCAGTGGGATAAATCTAAAAGATCTTGTCCAAGATCCTTCTTTGTTGGGTGGGACTATATCGGCATACAAGATAGTACCAGATGAAATAGAAGAAATCAAGGAAACACTCATAGACTGGTGTGATGAAAAGGAACTTAATTTAATATTAACAACTGGAGGAACGGGGTTTGCACCACGAGATGTCACTCCAGAGAAATTCCCAACATTCCCATTTTGTGGGCTCCAGAAAGGGGCCACAAAAGAAGTAATAGAGCGGGAAGCGCCAGGGATGGCCCTGGCAATGCTGATGGGATCGCTC…	MATEGMILTNHDHQIRVGVLTVSDSCFRNLAEDRSGINLKDLVQDPSLLGGTISAYKIVPDEIEEIKETLIDWCDEKELNLILTTGGTGFAPRDVTPEKFPTFPFCGLQKGATKEVIEREAPGMALAMLMGSLNVTPLGMLSRPVCGIRGKTLIINLPGSKKGSQIPDSIISRGVQVLPRDTASLSTTPSESPRAQATSRLSTASCPTPKLLNPEDDLLPGKIRDSNRSTLLATIQEHGYPTINLGIVGDNPDDLLNALNEGISRADVIITSGGVSMGEKDYLKQVLDIDLHAQIHFGRVFMKPGLPTTFATLDIDGVRKIIFALPGNPVSAVVTCNLFVVPALRKMQGILDPRPTIIKARLSCDVKLDPRPEYHRCILTWHHQEPLPWAQSTGNQMSS…	lcl|GPHN_71:8-1321_ORF1_GPHN_71:7:1320	['GPHN_71_ORF1']
GPHN_72	ORF1	566	60.82	GPHN	E40	ATGGCGACCGAGGGA	ATGGCGACCGAGGGAATGATCCTCACCAACCACGACCATCAAATCCGTGTCGGAGTCCTCACAGTGAGTGATAGCTGCTTCAGGAATCTTGCAGAAGACCGCAGTGGGATAAATCTAAAAGATCTTGTCCAAGATCCTTCTTTGTTGGGTGGGACTATATCGGCATACAAGATAGTACCAGATGAAATAGAAGAAATCAAGGAAACACTCATAGACTGGTGTGATGAAAAGGAACTTAATTTAATATTAACAACTGGAGGAACGGGGTTTGCACCACGAGATGTCACTCCAGAGAAATTCCCAACATTCCCATTTTGTGGGCTCCAGAAAGGGGCCACAAAAGAAGTAATAGAGCGGGAAGCGCCAGGGATGGCCCTGGCAATGCTGATGGGATCGCTC…	MATEGMILTNHDHQIRVGVLTVSDSCFRNLAEDRSGINLKDLVQDPSLLGGTISAYKIVPDEIEEIKETLIDWCDEKELNLILTTGGTGFAPRDVTPEKFPTFPFCGLQKGATKEVIEREAPGMALAMLMGSLNVTPLGMLSRPVCGIRGKTLIINLPGSKKGSQECFQFILPALPHAIDLLRDAIVKVKEVHDELEDLPSPPPPLSPPPTTSPHKQTEDKGVQCEEEEEEKKDSGVASTEDSSSSHITAAALAAKIPDSIISRGVQVLPRDTASLSTTPSESPRAQATSRLSTASCPTPKPTQTVMPGQVMRVTTGAPIPCGADAVVQVEDTELIRESDDGTEELEVRILVQARPGQDIRPIGHDIKRGECVLAKGTHMGPSEIGLLATVGVTEVEVN…	lcl|GPHN_72:8-1708_ORF1_GPHN_72:7:1707	['GPHN_72_ORF1']
GPHN_73	ORF1	580	63.73	GPHN	E40	ATGGCGACCGAGGGA	ATGGCGACCGAGGGAATGATCCTCACCAACCACGACCATCAAATCCGTGTCGGAGTCCTCACAGTGAGTGATAGCTGCTTCAGGAATCTTGCAGAAGACCGCAGTGGGATAAATCTAAAAGATCTTGTCCAAGATCCTTCTTTGTTGGGTGGGACTATATCGGCATACAAGATAGTACCAGATGAAATAGAAGAAATCAAGGAAACACTCATAGACTGGTGTGATGAAAAGGAACTTAATTTAATATTAACAACTGGAGGAACGGGGTTTGCACCACGAGATGTCACTCCAGAGAAATTCCCAACATTCCCATTTTGTGGGCTCCAGAAAGGGCTCCACTCTAGATTGGAAGGGCTTAAAGATGAACTCTGGAGGAATAGAGGCTACGACTTAAGAGTC…	MATEGMILTNHDHQIRVGVLTVSDSCFRNLAEDRSGINLKDLVQDPSLLGGTISAYKIVPDEIEEIKETLIDWCDEKELNLILTTGGTGFAPRDVTPEKFPTFPFCGLQKGLHSRLEGLKDELWRNRGYDLRVQSRCSSKENILRASHSAVDITKVARRHRMSPFPLTSMDKAFITVLEMTPVLGTEIINYRDGMGRVLAQDVYAKDNLPPFPASVKDGYAVRAADGPGDRFIIGESQAGEQPTQTVMPGQVMRVTTGAPIPCGADAVVQVEDTELIRESDDGTEELEVRILVQARPGQDIRPIGHDIKRGECVLAKGTHMGPSEIGLLATVGVTEVEVNKFPVVAVMSTGNELLNPEDDLLPGKIRDSNRSTLLATIQEHGYPTINLGIVGDNPDDLL…	lcl|GPHN_73:8-1750_ORF1_GPHN_73:7:1749	['GPHN_73_ORF1']
GPHN_74	ORF1	692	75.14	GPHN	E40	ATGGCGACCGAGGGA	ATGGCGACCGAGGGAATGATCCTCACCAACCACGACCATCAAATCCGTGTCGGAGTCCTCACAGTGAGTGATAGCTGCTTCAGGAATCTTGCAGAAGACCGCAGTGGGATAAATCTAAAAGATCTTGTCCAAGATCCTTCTTTGTTGGGTGGGACTATATCGGCATACAAGATAGTACCAGATGAAATAGAAGAAATCAAGGAAACACTCATAGACTGGTGTGATGAAAAGGAACTTAATTTAATATTAACAACTGGAGGAACGGGGTTTGCACCACGAGATGTCACTCCAGAGGCCACAAAAGAAGTAATAGAGCGGGAAGCGCCAGGGATGGCCCTGGCAATGCTGATGGGATCGCTCAATGTCACACCTCTGGGCATGCTCTCTAGACCAGTGTGT…	MATEGMILTNHDHQIRVGVLTVSDSCFRNLAEDRSGINLKDLVQDPSLLGGTISAYKIVPDEIEEIKETLIDWCDEKELNLILTTGGTGFAPRDVTPEATKEVIEREAPGMALAMLMGSLNVTPLGMLSRPVCGIRGKTLIINLPGSKKGSQIPDSIISRGVQVLPRDTASLSTTPSESPRAQATSRLSTASCPTPKQIRRPDESKGVASRVGSLKYLLSLGDFVHKTFKARLPSCSSTYSVSEVQSRCSSKENILRASHSAVDITKVARRHRMSPFPLTSMDKAFITVLEMTPVLGTEIINYRDGMGRVLAQDVYAKDNLPPFPASVKDGYAVRAADGPGDRFIIGESQAGEQPTQTVMPGQVMRVTTGAPIPCGADAVVQVEDTELIRESDDGTEEL…	lcl|GPHN_74:8-2086_ORF1_GPHN_74:7:2085	['GPHN_74_ORF1']
	ORF2	111	13.04	unknown	PTC	CTGGTAGCAAGAAAG	CTGGTAGCAAGAAAGGATCTCAGATTCCAGACTCCATCATTTCTCGTGGTGTTCAGGTGCTCCCACGAGACACAGCCTCCCTTAGCACTACTCCTTCAGAATCGCCCCGTGCTCAGGCTACATCTCGCCTCTCTACAGCTTCTTGTCCAACACCAAAACAAATTAGACGGCCGGATGAAAGCAAAGGAGTTGCTAGTAGAGTTGGATCCCTCAAATATCTATTATCACTGGGAGATTTTGTACATAAAACATTTAAGGCTCGGCTTCCGTCGTGCTCATCTACCTATAGTGTATCTGAGGTCCAGTCCAGGTGCAGCAGCAAGGAGAACATTCTAA	MVARKDLRFQTPSFLVVFRCSHETQPPLALLLQNRPVLRLHLASLQLLVQHQNKLDGRMKAKELLVELDPSNIYYHWEILYIKHLRLGFRRAHLPIVYLRSSPGAAARRTF	lcl|GPHN_74:441-776_ORF2_GPHN_74:440:775	['GPHN_120_ORF2', 'GPHN_74_ORF2']
GPHN_75	ORF1	672	72.87	GPHN	E40	ATGGCGACCGAGGGA	ATGGCGACCGAGGGAATGATCCTCACCAACCACGACCATCAAATCCGTGTCGGAGTCCTCACAGTGAGTGATAGCTGCTTCAGGAATCTTGCAGAAGACCGCAGTGGGATAAATCTAAAAGATCTTGTCCAAGATCCTTCTTTGTTGGGTGGGACTATATCGGCATACAAGATAGTACCAGATGAAATAGAAGAAATCAAGGAAACACTCATAGACTGGTGTGATGAAAAGGAACTTAATTTAATATTAACAACTGGAGGAACGGGGTTTGCACCACGAGATGTCACTCCAGAGAAATTCCCAACATTCCCATTTTGTGGGCTCCAGAAAGGGGCCACAAAAGAAGTAATAGAGCGGGAAGCGCCAGGGATGGCCCTGGCAATGCTGATGGGATCGCTC…	MATEGMILTNHDHQIRVGVLTVSDSCFRNLAEDRSGINLKDLVQDPSLLGGTISAYKIVPDEIEEIKETLIDWCDEKELNLILTTGGTGFAPRDVTPEKFPTFPFCGLQKGATKEVIEREAPGMALAMLMGSLNVTPLGMLSRPVCGIRGKTLIINLPGSKKGSQIPDSIISRGVQVLPRDTASLSTTPSESPRAQATSRLSTASCPTPKARLPSCSSTYSVSEVQSRCSSKENILRASHSAVDITKVARRHRMSPFPLTSMDKAFITVLEMTPVLGTEIINYRDGMGRVLAQDVYAKDNLPPFPASVKDGYAVRAADGPGDRFIIGESQAGEQPTQTVMPGQVMRVTTGAPIPCGADAVVQVEDTELIRESDDGTEELEVRILVQARPGQDIRPIGHD…	lcl|GPHN_75:8-2026_ORF1_GPHN_75:7:2025	['GPHN_75_ORF1']
GPHN_76	ORF1	153	16.73	GPHN	PTC	ATGGCGACCGAGGGA	ATGGCGACCGAGGGAATGATCCTCACCAACCACGACCATCAAATCCGTGTCGGAGTCCTCACAGTGAGTGATAGCTGCTTCAGGAATCTTGCAGAAGACCGCAGTGGGATAAATCTAAAAGATCTTGTCCAAGATCCTTCTTTGTTGGGTGGGACTATATCGGCATACAAGATAGTACCAGATGAAATAGAAGAAATCAAGGAAACACTCATAGACTGGTGTGATGAAAAGGAACTTAATTTAATATTAACAACTGGAGGAACGGGGTTTGCACCACGAGATGTCACTCCAGAGAAATTCCCAACATTCCCATTTTGTGGGCTCCAGAAAGGGGCCACAAAAGAAGTAATAGAGCGGGAAGCGCCAGGGATGGCCCTGGCAATGCTGATGGGATCGCTC…	MATEGMILTNHDHQIRVGVLTVSDSCFRNLAEDRSGINLKDLVQDPSLLGGTISAYKIVPDEIEEIKETLIDWCDEKELNLILTTGGTGFAPRDVTPEKFPTFPFCGLQKGATKEVIEREAPGMALAMLMGSLNVTPLGMLSRSQCCRYHQGG	lcl|GPHN_76:8-469_ORF1_GPHN_76:7:468	['GPHN_76_ORF1']
	ORF2	443	48.33	GPHN	E40	ATGTCACACCTCTGG	ATGTCACACCTCTGGGCATGCTCTCTAGGTCACAGTGCTGTAGATATCACCAAGGTGGCTAGAAGACATCGCATGTCTCCTTTTCCCCTGACGTCTATGGACAAAGCCTTCATTACAGTCCTGGAGATGACTCCGGTGCTTGGTACAGAAATCATCAATTACCGAGATGGAATGGGGCGAGTCCTTGCTCAAGATGTATATGCAAAAGACAACCTACCCCCATTCCCTGCATCAGTAAAAGATGGCTATGCTGTTCGAGCTGCTGATGGTCCAGGGGATCGTTTCATCATTGGGGAATCCCAAGCTGGTGAGCAGCCAACTCAGACAGTAATGCCAGGACAAGTGATGCGGGTTACAACAGGTGCTCCAATCCCCTGCGGTGCTGATGCAGTAGTGCAA…	MSHLWACSLGHSAVDITKVARRHRMSPFPLTSMDKAFITVLEMTPVLGTEIINYRDGMGRVLAQDVYAKDNLPPFPASVKDGYAVRAADGPGDRFIIGESQAGEQPTQTVMPGQVMRVTTGAPIPCGADAVVQVEDTELIRESDDGTEELEVRILVQARPGQDIRPIGHDIKRGECVLAKGTHMGPSEIGLLATVGVTEVEVNKFPVVAVMSTGNELLNPEDDLLPGKIRDSNRSTLLATIQEHGYPTINLGIVGDNPDDLLNALNEGISRADVIITSGGVSMGEKDYLKQVLDIDLHAQIHFGRVFMKPGLPTTFATLDIDGVRKIIFALPGNPVSAVVTCNLFVVPALRKMQGILDPRPTIIKARLSCDVKLDPRPEYHRCILTWHHQEPLPWAQST…	lcl|GPHN_76:408-1739_ORF2_GPHN_76:407:1738	['GPHN_76_ORF2']
GPHN_77	ORF1	726	78.46	GPHN	E40	ATGGCGACCGAGGGA	ATGGCGACCGAGGGAATGATCCTCACCAACCACGACCATCAAATCCGTGTCGGAGTCCTCACAGTGAGTGATAGCTGCTTCAGGAATCTTGCAGAAGACCGCAGTGGGATAAATCTAAAAGATCTTGTCCAAGATCCTTCTTTGTTGGGTGGGACTATATCGGCATACAAGATAGTACCAGATGAAATAGAAGAAATCAAGGAAACACTCATAGACTGGTGTGATGAAAAGGAACTTAATTTAATATTAACAACTGGAGGAACGGGGTTTGCACCACGAGATGTCACTCCAGAGGCCACAAAAGAAGTAATAGAGCGGGAAGCGCCAGGGATGGCCCTGGCAATGCTGATGGGATCGCTCAATGTCACACCTCTGGGCATGCTCTCTAGACCAGTGTGT…	MATEGMILTNHDHQIRVGVLTVSDSCFRNLAEDRSGINLKDLVQDPSLLGGTISAYKIVPDEIEEIKETLIDWCDEKELNLILTTGGTGFAPRDVTPEATKEVIEREAPGMALAMLMGSLNVTPLGMLSRPVCGIRGKTLIINLPGSKKGSQECFQFILPALPHAIDLLRDAIVKVKEVHDELEDLPSPPPPLSPPPTTSPHKQTEDKGVQCEEEEEEKKDSGVASTEDSSSSHITAAALAAKKHPFYTSPALFMANHGQPIPGLISYSHHATGSADKRIPDSIISRGVQVLPRDTASLSTTPSESPRAQATSRLSTASCPTPKVQSRCSSKENILRANGMGRVLAQDVYAKDNLPPFPASVKDGYAVRAADGPGDRFIIGESQAGEQPTQTVMPGQVM…	lcl|GPHN_77:8-2188_ORF1_GPHN_77:7:2187	['GPHN_77_ORF1']
	ORF2	100	11.18	unknown	PTC	CTGCAGCAGCTCTTG	CTGCAGCAGCTCTTGCTGCAAAGAAGCATCCATTCTACACCAGTCCTGCTCTTTTCATGGCAAATCATGGGCAGCCCATCCCTGGTCTCATCAGTTATTCCCATCATGCAACAGGCAGTGCAGATAAACGGATTCCAGACTCCATCATTTCTCGTGGTGTTCAGGTGCTCCCACGAGACACAGCCTCCCTTAGCACTACTCCTTCAGAATCGCCCCGTGCTCAGGCTACATCTCGCCTCTCTACAGCTTCTTGTCCAACACCAAAAGTCCAGTCCAGGTGCAGCAGCAAGGAGAACATTCTAA	MQQLLLQRSIHSTPVLLFSWQIMGSPSLVSSVIPIMQQAVQINGFQTPSFLVVFRCSHETQPPLALLLQNRPVLRLHLASLQLLVQHQKSSPGAAARRTF	lcl|GPHN_77:714-1016_ORF2_GPHN_77:713:1015	['GPHN_105_ORF2', 'GPHN_116_ORF1', 'GPHN_119_ORF1', 'GPHN_143_ORF2', 'GPHN_144_ORF2', 'GPHN_164_ORF1', 'GPHN_171_ORF2', 'GPHN_185_ORF2', 'GPHN_190_ORF2', 'GPHN_241_ORF2', 'GPHN_254_ORF2', 'GPHN_38_ORF2', 'GPHN_4_ORF2', 'GPHN_51_ORF2', 'GPHN_57_ORF2', 'GPHN_77_ORF2', 'GPHN_95_ORF1']
GPHN_78	ORF1	738	80.06	GPHN	E40	ATGGCGACCGAGGGA	ATGGCGACCGAGGGAATGATCCTCACCAACCACGACCATCAAATCCGTGTCGGAGTCCTCACAGTGAGTGATAGCTGCTTCAGGAATCTTGCAGAAGACCGCAGTGGGATAAATCTAAAAGATCTTGTCCAAGATCCTTCTTTGTTGGGTGGGACTATATCGGCATACAAGATAGTACCAGATGAAATAGAAGAAATCAAGGCCACAAAAGAAGTAATAGAGCGGGAAGCGCCAGGGATGGCCCTGGCAATGCTGATGGGATCGCTCAATGTCACACCTCTGGGCATGCTCTCTAGACCAGTGTGTGGAATAAGGGGGAAAACTCTGATAATTAACCTACCTGGTAGCAAGAAAGGATCTCAGGAATGCTTTCAGTTCATACTGCCAGCTCTACCTCAT…	MATEGMILTNHDHQIRVGVLTVSDSCFRNLAEDRSGINLKDLVQDPSLLGGTISAYKIVPDEIEEIKATKEVIEREAPGMALAMLMGSLNVTPLGMLSRPVCGIRGKTLIINLPGSKKGSQECFQFILPALPHAIDLLRDAIVKVKEVHDELEDLPSPPPPLSPPPTTSPHKQTEDKGVQCEEEEEEKKDSGVASTEDSSSSHITAAALAAKIPDSIISRGVQVLPRDTASLSTTPSESPRAQATSRLSTASCPTPKQIRRPDESKGVASRVGSLKYLLSLGDFVHKTFKVQSRCSSKENILRASHSAVDITKVARRHRMSPFPLTSMDKAFITVLEMTPVLGTEIINYRDGMGRVLAQDVYAKDNLPPFPASVKDGYAVRAADGPGDRFIIGESQAGE…	lcl|GPHN_78:8-2224_ORF1_GPHN_78:7:2223	['GPHN_78_ORF1']
GPHN_79	ORF1	661	71.85	GPHN	E40	CTGCTTCAGGAATCT	CTGCTTCAGGAATCTTGCAGAAGACCGCAGTGGGATAAATCTAAAAGATCTTGTCCAAGATCCTTCTTTGCCACAAAAGAAGTAATAGAGCGGGAAGCGCCAGGGATGGCCCTGGCAATGCTGATGGGATCGCTCAATGTCACACCTCTGGGCATGCTCTCTAGACCAGTGTGTGGAATAAGGGGGAAAACTCTGATAATTAACCTACCTGGTAGCAAGAAAGGATCTCAGGAATGCTTTCAGTTCATACTGCCAGCTCTACCTCATGCCATTGACCTTTTACGTGATGCCATTGTAAAAGTAAAGGAGGTGCATGATGAACTTGAAGATTTACCTTCCCCACCACCTCCTCTCTCTCCACCTCCTACAACTAGCCCACATAAACAGACAGAAGACAAA…	MLQESCRRPQWDKSKRSCPRSFFATKEVIEREAPGMALAMLMGSLNVTPLGMLSRPVCGIRGKTLIINLPGSKKGSQECFQFILPALPHAIDLLRDAIVKVKEVHDELEDLPSPPPPLSPPPTTSPHKQTEDKGVQCEEEEEEKKDSGVASTEDSSSSHITAAALAAKIPDSIISRGVQVLPRDTASLSTTPSESPRAQATSRLSTASCPTPKVQSRCSSKENILRASHSAVDITKVARRHRMSPFPLTSMDKAFITVLEMTPVLGTEIINYRDGMGRVLAQDVYAKDNLPPFPASVKDGYAVRAADGPGDRFIIGESQAGEQPTQTVMPGQVMRVTTGAPIPCGADAVVQVEDTELIRESDDGTEELEVRILVQARPGQDIRPIGHDIKRGECVLAKG…	lcl|GPHN_79:82-2067_ORF1_GPHN_79:81:2066	['GPHN_79_ORF1']
GPHN_80	ORF1	154	16.6	GPHN	PTC	ATGGCGACCGAGGGA	ATGGCGACCGAGGGAATGATCCTCACCAACCACGACCATCAAATCCGTGTCGGAGTCCTCACAGTGAGTGATAGCTGCTTCAGGAATCTTGCAGAAGACCGCAGTGGGATAAATCTAAAAGATCTTGTCCAAGATCCTTCTTTGTTGGGTGGGACTATATCGGCATACAAGATAGTACCAGATGAAATAGAAGAAATCAAGGAAACACTCATAGACTGGTGTGATGAAAAGGAACTTAATTTAATATTAACAACTGGAGGAACGGGGTTTGCACCACGAGATGTCACTCCAGAGGCCACAAAAGAAGTAATAGAGCGGGAAGCGCCAGGGATGGCCCTGGCAATGCTGATGGGATCGCTCAATGTCACACCTCTGGGCATGCTCTCTAGACCAGTGTGT…	MATEGMILTNHDHQIRVGVLTVSDSCFRNLAEDRSGINLKDLVQDPSLLGGTISAYKIVPDEIEEIKETLIDWCDEKELNLILTTGGTGFAPRDVTPEATKEVIEREAPGMALAMLMGSLNVTPLGMLSRPVCGIRGKTLIINLPGSKKGSQPT	lcl|GPHN_80:8-472_ORF1_GPHN_80:7:471	['GPHN_104_ORF1', 'GPHN_119_ORF2', 'GPHN_169_ORF2', 'GPHN_209_ORF1', 'GPHN_55_ORF1', 'GPHN_80_ORF1']
	ORF2	419	45.61	GPHN	E40	ATGTCTCCTTTTCCC	ATGTCTCCTTTTCCCCTGACGTCTATGGACAAAGCCTTCATTACAGTCCTGGAGATGACTCCGGTGCTTGGTACAGAAATCATCAATTACCGAGATGGAATGGGGCGAGTCCTTGCTCAAGATGTATATGCAAAAGACAACCTACCCCCATTCCCTGCATCAGTAAAAGATGGCTATGCTGTTCGAGCTGCTGATGGTCCAGGGGATCGTTTCATCATTGGGGAATCCCAAGCTGGTGAGCAGCCAACTCAGACAGTAATGCCAGGACAAGTGATGCGGGTTACAACAGGTGCTCCAATCCCCTGCGGTGCTGATGCAGTAGTGCAAGTTGAAGATACTGAACTCATCAGGGAATCAGATGATGGTACTGAAGAACTTGAAGTACGAATTCTGGTGCAA…	MSPFPLTSMDKAFITVLEMTPVLGTEIINYRDGMGRVLAQDVYAKDNLPPFPASVKDGYAVRAADGPGDRFIIGESQAGEQPTQTVMPGQVMRVTTGAPIPCGADAVVQVEDTELIRESDDGTEELEVRILVQARPGQDIRPIGHDIKRGECVLAKGTHMGPSEIGLLATVGVTEVEVNKFPVVAVMSTGNELLNPEDDLLPGKIRDSNRSTLLATIQEHGYPTINLGIVGDNPDDLLNALNEGISRADVIITSGGVSMGEKDYLKQVLDIDLHAQIHFGRVFMKPGLPTTFATLDIDGVRKIIFALPGNPVSAVVTCNLFVVPALRKMQGILDPRPTIIKARLSCDVKLDPRPEYHRCILTWHHQEPLPWAQSTGNQMSSRLMSMRSANGLLMLPPKT…	lcl|GPHN_80:638-1897_ORF2_GPHN_80:637:1896	['GPHN_110_ORF1', 'GPHN_15_ORF1', 'GPHN_173_ORF1', 'GPHN_192_ORF2', 'GPHN_209_ORF3', 'GPHN_227_ORF2', 'GPHN_228_ORF2', 'GPHN_257_ORF1', 'GPHN_264_ORF2', 'GPHN_265_ORF2', 'GPHN_268_ORF2', 'GPHN_30_ORF1', 'GPHN_36_ORF1', 'GPHN_52_ORF1', 'GPHN_80_ORF2']
GPHN_81	ORF1	796	86.4	GPHN	E40	ATGGCGACCGAGGGA	ATGGCGACCGAGGGAATGATCCTCACCAACCACGACCATCAAATCCGTGTCGGAGTCCTCACAGTGAGTGATAGCTGCTTCAGGAATCTTGCAGAAGACCGCAGTGGGATAAATCTAAAAGATCTTGTCCAAGATCCTTCTTTGTTGGGTGGGACTATATCGGCATACAAGATAGTACCAGATGAAATAGAAGAAATCAAGGAAACACTCATAGACTGGTGTGATGAAAAGGAACTTAATTTAATATTAACAACTGGAGGAACGGGGTTTGCACCACGAGATGTCACTCCAGAGAAATTCCCAACATTCCCATTTTGTGGGCTCCAGAAAGGGGCCACAAAAGAAGTAATAGAGCGGGAAGCGCCAGGGATGGCCCTGGCAATGCTGATGGGATCGCTC…	MATEGMILTNHDHQIRVGVLTVSDSCFRNLAEDRSGINLKDLVQDPSLLGGTISAYKIVPDEIEEIKETLIDWCDEKELNLILTTGGTGFAPRDVTPEKFPTFPFCGLQKGATKEVIEREAPGMALAMLMGSLNVTPLGMLSRPVCGIRGKTLIINLPGSKKGSQECFQFILPALPHAIDLLRDAIVKVKEVHDELEDLPSPPPPLSPPPTTSPHKQTEDKGVQCEEEEEEKKDSGVASTEDSSSSHITAAALAAKIPDSIISRGVQVLPRDTASLSTTPSESPRAQATSRLSTASCPTPKQIRRPDESKGVASRVGSLKYLLSLGDFVHKTFKARLPSCSSTYSVSEVQSRCSSKENILRASHSAVDITKVARRHRMSPFPLTSMDKAFITVLEMTPV…	lcl|GPHN_81:8-2398_ORF1_GPHN_81:7:2397	['GPHN_81_ORF1']
	ORF2	111	13.08	unknown	PTC	CTGCAGCAGCTCTTG	CTGCAGCAGCTCTTGCTGCAAAGATTCCAGACTCCATCATTTCTCGTGGTGTTCAGGTGCTCCCACGAGACACAGCCTCCCTTAGCACTACTCCTTCAGAATCGCCCCGTGCTCAGGCTACATCTCGCCTCTCTACAGCTTCTTGTCCAACACCAAAACAAATTAGACGGCCGGATGAAAGCAAAGGAGTTGCTAGTAGAGTTGGATCCCTCAAATATCTATTATCACTGGGAGATTTTGTACATAAAACATTTAAGGCTCGGCTTCCGTCGTGCTCATCTACCTATAGTGTATCTGAGGTCCAGTCCAGGTGCAGCAGCAAGGAGAACATTCTAA	MQQLLLQRFQTPSFLVVFRCSHETQPPLALLLQNRPVLRLHLASLQLLVQHQNKLDGRMKAKELLVELDPSNIYYHWEILYIKHLRLGFRRAHLPIVYLRSSPGAAARRTF	lcl|GPHN_81:753-1088_ORF2_GPHN_81:752:1087	['GPHN_117_ORF2', 'GPHN_138_ORF2', 'GPHN_169_ORF1', 'GPHN_23_ORF2', 'GPHN_274_ORF2', 'GPHN_277_ORF2', 'GPHN_81_ORF2']
GPHN_82	ORF1	723	78.26	GPHN	E40	ATGGCGACCGAGGGA	ATGGCGACCGAGGGAATGATCCTCACCAACCACGACCATCAAATCCGTGTCGGAGTCCTCACAGTGAGTGATAGCTGCTTCAGGAATCTTGCAGAAGACCGCAGTGGGATAAATCTAAAAGATCTTGTCCAAGATCCTTCTTTGTTGGGTGGGACTATATCGGCATACAAGATAGTACCAGATGAAATAGAAGAAATCAAGGAAACACTCATAGACTGGTGTGATGAAAAGGAACTTAATTTAATATTAACAACTGGAGGAACGGGGTTTGCACCACGAGATGTCACTCCAGAGGCCACAAAAGAAGTAATAGAGCGGGAAGCGCCAGGGATGGCCCTGGCAATGCTGATGGGATCGCTCAATGTCACACCTCTGGGCATGCTCTCTAGACCAGTGTGT…	MATEGMILTNHDHQIRVGVLTVSDSCFRNLAEDRSGINLKDLVQDPSLLGGTISAYKIVPDEIEEIKETLIDWCDEKELNLILTTGGTGFAPRDVTPEATKEVIEREAPGMALAMLMGSLNVTPLGMLSRPVCGIRGKTLIINLPGSKKGSQECFQFILPALPHAIDLLRDAIVKVKEVHDELEDLPSPPPPLSPPPTTSPHKQTEDKGVQCEEEEEEKKDSGVASTEDSSSSHITAAALAAKIPDSIISRGVQVLPRDTASLSTTPSESPRAQATSRLSTASCPTPKQIRRPDESKGVASRVGSLKYLLSLGDFVHKTFKVQSRCSSKENILRANGMGRVLAQDVYAKDNLPPFPASVKDGYAVRAADGPGDRFIIGESQAGEQPTQTVMPGQVMRVT…	lcl|GPHN_82:8-2179_ORF1_GPHN_82:7:2178	['GPHN_82_ORF1']
GPHN_83	ORF1	290	31.13	GPHN	PTC	ATGGCGACCGAGGGA	ATGGCGACCGAGGGAATGATCCTCACCAACCACGACCATCAAATCCGTGTCGGAGTCCTCACAGTGAGTGATAGCTGCTTCAGGAATCTTGCAGAAGACCGCAGTGGGATAAATCTAAAAGATCTTGTCCAAGATCCTTCTTTGTTGGGTGGGACTATATCGGCATACAAGATAGTACCAGATGAAATAGAAGAAATCAAGGAAACACTCATAGACTGGTGTGATGAAAAGGAACTTAATTTAATATTAACAACTGGAGGAACGGGGTTTGCACCACGAGATGTCACTCCAGAGGCCACAAAAGAAGTAATAGAGCGGGAAGCGCCAGGGATGGCCCTGGCAATGCTGATGGGATCGCTCAATGTCACACCTCTGGGCATGCTCTCTAGACCAGTGTGT…	MATEGMILTNHDHQIRVGVLTVSDSCFRNLAEDRSGINLKDLVQDPSLLGGTISAYKIVPDEIEEIKETLIDWCDEKELNLILTTGGTGFAPRDVTPEATKEVIEREAPGMALAMLMGSLNVTPLGMLSRPVCGIRGKTLIINLPGSKKGSQECFQFILPALPHAIDLLRDAIVKVKEVHDELEDLPSPPPPLSPPPTTSPHKQTEDKGVQCEEEEEEKKDSGVASTEDSSSSHITAAALAAKIPDSIISRGVQVLPRDTASLSTTPSESPRAQATSRLSTASCPTPKPR	lcl|GPHN_83:8-880_ORF1_GPHN_83:7:879	['GPHN_83_ORF1']
	ORF2	239	26.88	GPHN	E40	CTGCAGCAGCTCTTG	CTGCAGCAGCTCTTGCTGCAAAGATTCCAGACTCCATCATTTCTCGTGGTGTTCAGGTGCTCCCACGAGACACAGCCTCCCTTAGCACTACTCCTTCAGAATCGCCCCGTGCTCAGGCTACATCTCGCCTCTCTACAGCTTCTTGTCCAACACCAAAACCCAGATGACTTACTCAATGCCTTGAATGAGGGTATCAGCCGTGCTGATGTCATCATCACGTCAGGAGGTGTGTCCATGGGGGAAAAGGACTATCTCAAGCAGGTGCTGGACATTGATCTTCATGCTCAGATCCATTTTGGCAGAGTTTTTATGAAGCCAGGCTTGCCAACAACATTTGCAACTTTGGATATTGATGGTGTAAGAAAAATTATTTTTGCACTACCAGGGAATCCTGTATCA…	MQQLLLQRFQTPSFLVVFRCSHETQPPLALLLQNRPVLRLHLASLQLLVQHQNPDDLLNALNEGISRADVIITSGGVSMGEKDYLKQVLDIDLHAQIHFGRVFMKPGLPTTFATLDIDGVRKIIFALPGNPVSAVVTCNLFVVPALRKMQGILDPRPTIIKARLSCDVKLDPRPEYHRCILTWHHQEPLPWAQSTGNQMSSRLMSMRSANGLLMLPPKTEQYVELHKGEVVDVMVIGRL	lcl|GPHN_83:714-1433_ORF2_GPHN_83:713:1432	['GPHN_83_ORF2']
GPHN_84	ORF1	436	47.65	GPHN	E40	ATGGCGACCGAGGGA	ATGGCGACCGAGGGAATGATCCTCACCAACCACGACCATCAAATCCGTGTCGGAGTCCTCACAGTGAGTGATAGCTGCTTCAGGAATCTTGCAGAAGACCGCAGTGGGATAAATCTAAAAGATCTTGTCCAAGATCCTTCTTTGTTGGGTGGGACTATATCGGCATACAAGATAGTACCAGATGAAATAGAAGAAATCAAGGAAACACTCATAGACTGGTGTGATGAAAAGGAACTTAATTTAATATTAACAACTGGAGGAACGGGGTTTGCACCACGAGATGTCACTCCAGAGCCAACTCAGACAGTAATGCCAGGACAAGTGATGCGGGTTACAACAGGTGCTCCAATCCCCTGCGGTGCTGATGCAGTAGTGCAAGTTGAAGATACTGAACTCATC…	MATEGMILTNHDHQIRVGVLTVSDSCFRNLAEDRSGINLKDLVQDPSLLGGTISAYKIVPDEIEEIKETLIDWCDEKELNLILTTGGTGFAPRDVTPEPTQTVMPGQVMRVTTGAPIPCGADAVVQVEDTELIRESDDGTEELEVRILVQARPGQDIRPIGHDIKRGECVLAKGTHMGPSEIGLLATVGVTEVEVNKFPVVAVMSTGNELLNPEDDLLPGKIRDSNRSTLLATIQEHGYPTINLGIVGDNPDDLLNALNEGISRADVIITSGGVSMGEKDYLKQVLDIDLHAQIHFGRVFMKPGLPTTFATLDIDGVRKIIFALPGNPVSAVVTCNLFVVPALRKMQGILDPRPTIIKARLSCDVKLDPRPEYHRCILTWHHQEPLPWAQSTGNQMSSR…	lcl|GPHN_84:8-1318_ORF1_GPHN_84:7:1317	['GPHN_84_ORF1']
GPHN_85	ORF1	123	13.57	GPHN	PTC	ATGGCGACCGAGGGA	ATGGCGACCGAGGGAATGATCCTCACCAACCACGACCATCAAATCCGTGTCGGAGTCCTCACAGTGAGTGATAGCTGCTTCAGGAATCTTGCAGAAGACCGCAGTGGGATAAATCTAAAAGATCTTGTCCAAGATCCTTCTTTGTTGGGTGGGACTATATCGGCATACAAGATAGTACCAGATGAAATAGAAGAAATCAAGGAAACACTCATAGACTGGTGTGATGAAAAGGAACTTAATTTAATATTAACAACTGGAGGAACGGGGTTTGCACCACGAGATGTCACTCCAGAGAAATTCCCAACATTCCCATTTTGTGGGCTCCAGAAAGGGACCAGTGTGTGGAATAAGGGGGAAAACTCTGATAATTAA	MATEGMILTNHDHQIRVGVLTVSDSCFRNLAEDRSGINLKDLVQDPSLLGGTISAYKIVPDEIEEIKETLIDWCDEKELNLILTTGGTGFAPRDVTPEKFPTFPFCGLQKGTSVWNKGENSDN	lcl|GPHN_85:8-379_ORF1_GPHN_85:7:378	['GPHN_214_ORF1', 'GPHN_275_ORF1', 'GPHN_85_ORF1', 'GPHN_90_ORF1']
	ORF2	633	68.78	GPHN	E40	CTGGAGGAACGGGGT	CTGGAGGAACGGGGTTTGCACCACGAGATGTCACTCCAGAGAAATTCCCAACATTCCCATTTTGTGGGCTCCAGAAAGGGACCAGTGTGTGGAATAAGGGGGAAAACTCTGATAATTAACCTACCTGGTAGCAAGAAAGGATCTCAGGAATGCTTTCAGTTCATACTGCCAGCTCTACCTCATGCCATTGACCTTTTACGTGATGCCATTGTAAAAGTAAAGGAGGTGCATGATGAACTTGAAGATTTACCTTCCCCACCACCTCCTCTCTCTCCACCTCCTACAACTAGCCCACATAAACAGACAGAAGACAAAGGAGTTCAGTGTGAAGAAGAGGAAGAAGAAAAGAAAGACAGTGGTGTAGCTTCAACAGAAGATAGTTCCTCATCACATATAACT…	MEERGLHHEMSLQRNSQHSHFVGSRKGPVCGIRGKTLIINLPGSKKGSQECFQFILPALPHAIDLLRDAIVKVKEVHDELEDLPSPPPPLSPPPTTSPHKQTEDKGVQCEEEEEEKKDSGVASTEDSSSSHITAAALAAKIPDSIISRGVQVLPRDTASLSTTPSESPRAQATSRLSTASCPTPKVQSRCSSKENILRASHSAVDITKVARRHRMSPFPLTSMDKAFITVLEMTPVLGTEIINYRDGMGRVLAQDVYAKDNLPPFPASVKDGYAVRAADGPGDRFIIGESQAGEQPTQTVMPGQVMRVTTGAPIPCGADAVVQVEDTELIRESDDGTEELEVRILVQARPGQDIRPIGHDIKRGECVLAKGTHMGPSEIGLLATVGVTEVEVNKFPVVA…	lcl|GPHN_85:261-2162_ORF2_GPHN_85:260:2161	['GPHN_85_ORF2']
GPHN_86	ORF1	368	40.24	GPHN	E40	ATGGCGACCGAGGGA	ATGGCGACCGAGGGAATGATCCTCACCAACCACGACCATCAAATCCGTGTCGGAGTCCTCACAGTGAGTGATAGCTGCTTCAGGAATCTTGCAGAAGACCGCAGTGGGATAAATCTAAAAGATCTTGTCCAAGATCCTTCTTTGTTGGGTGGGACTATATCGGCATACAAGATAGTACCAGATGAAATAGAAGAAATCAAGGAAACACTCATAGACTGGTGTGATGAAAAGGAACTTAATTTAATATTAACAACTGGAGGAACGGGGTTTGCACCACGAGATGTCACTCCAGAGGCCACAAAAGAAGTAATAGAGCGGGAAGCGCCAGGGATGGCCCTGGCAATGCTGATGGGATCGCTCAATGTCACACCTCTGGGCATGCTCTCTAGACCAGTGTGT…	MATEGMILTNHDHQIRVGVLTVSDSCFRNLAEDRSGINLKDLVQDPSLLGGTISAYKIVPDEIEEIKETLIDWCDEKELNLILTTGGTGFAPRDVTPEATKEVIEREAPGMALAMLMGSLNVTPLGMLSRPVCGIRGKTLIINLPGSKKGSQIPDSIISRGVQVLPRDTASLSTTPSESPRAQATSRLSTASCPTPKARLPSCSSTYSVSEDYLKQVLDIDLHAQIHFGRVFMKPGLPTTFATLDIDGVRKIIFALPGNPVSAVVTCNLFVVPALRKMQGILDPRPTIIKARLSCDVKLDPRPEYHRCILTWHHQEPLPWAQSTGNQMSSRLMSMRSANGLLMLPPKTEQYVELHKGEVVDVMVIGRL	lcl|GPHN_86:8-1114_ORF1_GPHN_86:7:1113	['GPHN_86_ORF1']
GPHN_87	ORF1	572	61.58	GPHN	E40	ATGGCGACCGAGGGA	ATGGCGACCGAGGGAATGATCCTCACCAACCACGACCATCAAATCCGTGTCGGAGTCCTCACAGTGAGTGATAGCTGCTTCAGGAATCTTGCAGAAGACCGCAGTGGGATAAATCTAAAAGATCTTGTCCAAGATCCTTCTTTGTTGGGTGGGACTATATCGGCATACAAGATAGTACCAGATGAAATAGAAGAAATCAAGGAAACACTCATAGACTGGTGTGATGAAAAGGAACTTAATTTAATATTAACAACTGGAGGAACGGGGTTTGCACCACGAGATGTCACTCCAGAGGCCACAAAAGAAGTAATAGAGCGGGAAGCGCCAGGGATGGCCCTGGCAATGCTGATGGGATCGCTCAATGTCACACCTCTGGGCATGCTCTCTAGACCAGTGTGT…	MATEGMILTNHDHQIRVGVLTVSDSCFRNLAEDRSGINLKDLVQDPSLLGGTISAYKIVPDEIEEIKETLIDWCDEKELNLILTTGGTGFAPRDVTPEATKEVIEREAPGMALAMLMGSLNVTPLGMLSRPVCGIRGKTLIINLPGSKKGSQIPDSIISRGVQVLPRDTASLSTTPSESPRAQATSRLSTASCPTPKVQSRCSSKENILRASHSAVDITKVARRHRMSPFPLTSMDKAFITVLEMTPVLGTEIINYRDGMGRVLAQDVYAKDNLPPFPASVKDGYAVRAADGPGDRFIIGESQAGEQPTQTVMPGQVMRVTTGAPIPCGADAVVQVEDTELIRESDDGTEELEVRILVQARPGQDIRPIGHDIKRGECVLAKGTHMGPSEIGLLATVGV…	lcl|GPHN_87:8-1726_ORF1_GPHN_87:7:1725	['GPHN_87_ORF1']
GPHN_88	ORF1	227	25.15	GPHN	E40	CTGCTAAATCCTGAA	CTGCTAAATCCTGAAGATGATCTCTTACCAGGAAAGATTCGGGACAGCAATCGATCAACACTTCTAGCAACAATTCAGGAACATGGTTACCCAACAATCAACCTGGGAATTGTAGGAGACAACCCAGATGACTTACTCAATGCCTTGAATGAGGGTATCAGCCGTGCTGATGTCATCATCACGTCAGGAGGTGTGTCCATGGGGGAAAAGGACTATCTCAAGCAGGTGCTGGACATTGATCTTCATGCTCAGATCCATTTTGGCAGAGTTTTTATGAAGCCAGGCTTGCCAACAACATTTGCAACTTTGGATATTGATGGTGTAAGAAAAATTATTTTTGCACTACCAGGGAATCCTGTATCAGCTGTGGTCACCTGCAACCTCTTTGTTGTACCTGCA…	MLNPEDDLLPGKIRDSNRSTLLATIQEHGYPTINLGIVGDNPDDLLNALNEGISRADVIITSGGVSMGEKDYLKQVLDIDLHAQIHFGRVFMKPGLPTTFATLDIDGVRKIIFALPGNPVSAVVTCNLFVVPALRKMQGILDPRPTIIKARLSCDVKLDPRPEYHRCILTWHHQEPLPWAQSTGNQMSSRLMSMRSANGLLMLPPKTEQYVELHKGEVVDVMVIGRL	lcl|GPHN_88:72-755_ORF1_GPHN_88:71:754	['GPHN_104_ORF2', 'GPHN_186_ORF1', 'GPHN_195_ORF3', 'GPHN_197_ORF2', 'GPHN_247_ORF1', 'GPHN_255_ORF1', 'GPHN_275_ORF2', 'GPHN_64_ORF1', 'GPHN_88_ORF1']
GPHN_89	ORF1	119	12.97	GPHN	PTC	CTGCTAAATCCTGAA	CTGCTAAATCCTGAAGATGATCTCTTACCAGGAAAGATTCGGGACAGCAATCGATCAACACTTCTAGCAACAATTCAGGAACATGGTTACCCAACAATCAACCTGGGAATTGTAGGAGACAACCCAGATGACTTACTCAATGCCTTGAATGAGGGTATCAGCCGTGCTGATGTCATCATCACGTCAGGAGGTGTGTCCATGGGGGAAAAGGACTATCTCAAGCAGGTGCTGGACATTGATCTTCATGCTCAGATCCATTTTGGCAGAGTTTTTATGAAGCCAGGCTTGCCAACAACATTTGCAACTTTGGATATTGATGGTGTAAGAAAAATTATTTTTGCACTACCAGTTATCGTGTGA	MLNPEDDLLPGKIRDSNRSTLLATIQEHGYPTINLGIVGDNPDDLLNALNEGISRADVIITSGGVSMGEKDYLKQVLDIDLHAQIHFGRVFMKPGLPTTFATLDIDGVRKIIFALPVIV	lcl|GPHN_89:1381-1740_ORF1_GPHN_89:1380:1739	['GPHN_89_ORF1']
	ORF2	459	49.47	GPHN	PTC	ATGGCGACCGAGGGA	ATGGCGACCGAGGGAATGATCCTCACCAACCACGACCATCAAATCCGTGTCGGAGTCCTCACAGTGAGTGATAGCTGCTTCAGGAATCTTGCAGAAGACCGCAGTGGGATAAATCTAAAAGATCTTGTCCAAGATCCTTCTTTGTTGGGTGGGACTATATCGGCATACAAGATAGTACCAGATGAAATAGAAGAAATCAAGGAAACACTCATAGACTGGTGTGATGAAAAGGAACTTAATTTAATATTAACAACTGGAGGAACGGGGTTTGCACCACGAGATGTCACTCCAGAGGCCACAAAAGAAGTAATAGAGCGGGAAGCGCCAGGGATGGCCCTGGCAATGCTGATGGGATCGCTCAATGTCACACCTCTGGGCATGCTCTCTAGACCAGTGTGT…	MATEGMILTNHDHQIRVGVLTVSDSCFRNLAEDRSGINLKDLVQDPSLLGGTISAYKIVPDEIEEIKETLIDWCDEKELNLILTTGGTGFAPRDVTPEATKEVIEREAPGMALAMLMGSLNVTPLGMLSRPVCGIRGKTLIINLPGSKKGSQECFQFILPALPHAIDLLRDAIVKVKEVHDELEDLPSPPPPLSPPPTTSPHKQTEDKGVQCEEEEEEKKDSGVASTEDSSSSHITAAALAAKIPDSIISRGVQVLPRDTASLSTTPSESPRAQATSRLSTASCPTPKVQSRCSSKENILRASHSAVDITKVARRHRMSPFPLTSMDKAFITVLEMTPVLGTEIINYRDGMGRVLAQDVYAKDNLPPFPASVKDGYAVRAADGPGDRFIIGESQAGEQP…	lcl|GPHN_89:8-1387_ORF2_GPHN_89:7:1386	['GPHN_64_ORF2', 'GPHN_89_ORF2']
GPHN_90	ORF1	123	13.57	GPHN	PTC	ATGGCGACCGAGGGA	ATGGCGACCGAGGGAATGATCCTCACCAACCACGACCATCAAATCCGTGTCGGAGTCCTCACAGTGAGTGATAGCTGCTTCAGGAATCTTGCAGAAGACCGCAGTGGGATAAATCTAAAAGATCTTGTCCAAGATCCTTCTTTGTTGGGTGGGACTATATCGGCATACAAGATAGTACCAGATGAAATAGAAGAAATCAAGGAAACACTCATAGACTGGTGTGATGAAAAGGAACTTAATTTAATATTAACAACTGGAGGAACGGGGTTTGCACCACGAGATGTCACTCCAGAGAAATTCCCAACATTCCCATTTTGTGGGCTCCAGAAAGGGACCAGTGTGTGGAATAAGGGGGAAAACTCTGATAATTAA	MATEGMILTNHDHQIRVGVLTVSDSCFRNLAEDRSGINLKDLVQDPSLLGGTISAYKIVPDEIEEIKETLIDWCDEKELNLILTTGGTGFAPRDVTPEKFPTFPFCGLQKGTSVWNKGENSDN	lcl|GPHN_90:8-379_ORF1_GPHN_90:7:378	['GPHN_214_ORF1', 'GPHN_275_ORF1', 'GPHN_85_ORF1', 'GPHN_90_ORF1']
	ORF2	542	58.97	GPHN	E40	CTGGAGGAACGGGGT	CTGGAGGAACGGGGTTTGCACCACGAGATGTCACTCCAGAGAAATTCCCAACATTCCCATTTTGTGGGCTCCAGAAAGGGACCAGTGTGTGGAATAAGGGGGAAAACTCTGATAATTAACCTACCTGGTAGCAAGAAAGGATCTCAGATTCCAGACTCCATCATTTCTCGTGGTGTTCAGGTGCTCCCACGAGACACAGCCTCCCTTAGCACTACTCCTTCAGAATCGCCCCGTGCTCAGGCTACATCTCGCCTCTCTACAGCTTCTTGTCCAACACCAAAAGTCCAGTCCAGGTGCAGCAGCAAGGAGAACATTCTAAGAGCCAGTCACAGTGCTGTAGATATCACCAAGGTGGCTAGAAGACATCGCATGTCTCCTTTTCCCCTGACGTCTATGGAC…	MEERGLHHEMSLQRNSQHSHFVGSRKGPVCGIRGKTLIINLPGSKKGSQIPDSIISRGVQVLPRDTASLSTTPSESPRAQATSRLSTASCPTPKVQSRCSSKENILRASHSAVDITKVARRHRMSPFPLTSMDKAFITVLEMTPVLGTEIINYRDGMGRVLAQDVYAKDNLPPFPASVKDGYAVRAADGPGDRFIIGESQAGEQPTQTVMPGQVMRVTTGAPIPCGADAVVQVEDTELIRESDDGTEELEVRILVQARPGQDIRPIGHDIKRGECVLAKGTHMGPSEIGLLATVGVTEVEVNKFPVVAVMSTGNELLNPEDDLLPGKIRDSNRSTLLATIQEHGYPTINLGIVGDNPDDLLNALNEGISRADVIITSGGVSMGEKDYLKQVLDIDLHAQ…	lcl|GPHN_90:261-1889_ORF2_GPHN_90:260:1888	['GPHN_90_ORF2']
GPHN_91	ORF1	749	81.18	GPHN	E40	ATGGCGACCGAGGGA	ATGGCGACCGAGGGAATGATCCTCACCAACCACGACCATCAAATCCGTGTCGGAGTCCTCACAGTGAGTGATAGCTGCTTCAGGAATCTTGCAGAAGACCGCAGTGGGATAAATCTAAAAGATCTTGTCCAAGATCCTTCTTTGTTGGGTGGGACTATATCGGCATACAAGATAGTACCAGATGAAATAGAAGAAATCAAGGAAACACTCATAGACTGGTGTGATGAAAAGGAACTTAATTTAATATTAACAACTGGAGGAACGGGGTTTGCACCACGAGATGTCACTCCAGAGGCCACAAAAGAAGTAATAGAGCGGGAAGCGCCAGGGATGGCCCTGGCAATGCTGATGGGATCGCTCAATGTCACACCTCTGGGCATGCTCTCTAGACCAGTGTGT…	MATEGMILTNHDHQIRVGVLTVSDSCFRNLAEDRSGINLKDLVQDPSLLGGTISAYKIVPDEIEEIKETLIDWCDEKELNLILTTGGTGFAPRDVTPEATKEVIEREAPGMALAMLMGSLNVTPLGMLSRPVCGIRGKTLIINLPGSKKGSQECFQFILPALPHAIDLLRDAIVKVKEVHDELEDLPSPPPPLSPPPTTSPHKQTEDKGVQCEEEEEEKKDSGVASTEDSSSSHITAAALAAKIPDSIISRGVQVLPRDTASLSTTPSESPRAQATSRLSTASCPTPKVQSRCSSKENILRASLNLKDLAFSRISGHSAVDITKVARRHRMSPFPLTSMDKAFITVLEMTPVLGTEIINYRDGMGRVLAQDVYAKDNLPPFPASVKDGYAVRAADGPGD…	lcl|GPHN_91:8-2257_ORF1_GPHN_91:7:2256	['GPHN_91_ORF1']
GPHN_92	ORF1	352	38.02	GPHN	PTC	ATGGCGACCGAGGGA	ATGGCGACCGAGGGAATGATCCTCACCAACCACGACCATCAAATCCGTGTCGGAGTCCTCACAGTGAGTGATAGCTGCTTCAGGAATCTTGCAGAAGACCGCAGTGGGATAAATCTAAAAGATCTTGTCCAAGATCCTTCTTTGTTGGGTGGGACTATATCGGCATACAAGATAGTACCAGATGAAATAGAAGAAATCAAGGAAACACTCATAGACTGGTGTGATGAAAAGGAACTTAATTTAATATTAACAACTGGAGGAACGGGGTTTGCACCACGAGATGTCACTCCAGAGGCCACAAAAGAAGTAATAGAGCGGGAAGCGCCAGGGATGGCCCTGGCAATGCTGATGGGATCGCTCAATGTCACACCTCTGGGCATGCTCTCTAGACCAGTGTGT…	MATEGMILTNHDHQIRVGVLTVSDSCFRNLAEDRSGINLKDLVQDPSLLGGTISAYKIVPDEIEEIKETLIDWCDEKELNLILTTGGTGFAPRDVTPEATKEVIEREAPGMALAMLMGSLNVTPLGMLSRPVCGIRGKTLIINLPGSKKGSQECFQFILPALPHAIDLLRDAIVKVKEVHDELEDLPSPPPPLSPPPTTSPHKQTEDKGVQCEEEEEEKKDSGVASTEDSSSSHITAAALAAKIPDSIISRGVQVLPRDTASLSTTPSESPRAQATSRLSTASCPTPKVQSRCSSKENILRASHSAVDITKVARRHRMSPFPLTSMDKAFITVLEMTPVLGTEIINYRAAKS	lcl|GPHN_92:8-1066_ORF1_GPHN_92:7:1065	['GPHN_92_ORF1']
	ORF2	236	26.14	GPHN	E40	TTGGTACAGAAATCA	TTGGTACAGAAATCATCAATTACCGAGCTGCTAAATCCTGAAGATGATCTCTTACCAGGAAAGATTCGGGACAGCAATCGATCAACACTTCTAGCAACAATTCAGGAACATGGTTACCCAACAATCAACCTGGGAATTGTAGGAGACAACCCAGATGACTTACTCAATGCCTTGAATGAGGGTATCAGCCGTGCTGATGTCATCATCACGTCAGGAGGTGTGTCCATGGGGGAAAAGGACTATCTCAAGCAGGTGCTGGACATTGATCTTCATGCTCAGATCCATTTTGGCAGAGTTTTTATGAAGCCAGGCTTGCCAACAACATTTGCAACTTTGGATATTGATGGTGTAAGAAAAATTATTTTTGCACTACCAGGGAATCCTGTATCAGCTGTGGTC…	MVQKSSITELLNPEDDLLPGKIRDSNRSTLLATIQEHGYPTINLGIVGDNPDDLLNALNEGISRADVIITSGGVSMGEKDYLKQVLDIDLHAQIHFGRVFMKPGLPTTFATLDIDGVRKIIFALPGNPVSAVVTCNLFVVPALRKMQGILDPRPTIIKARLSCDVKLDPRPEYHRCILTWHHQEPLPWAQSTGNQMSSRLMSMRSANGLLMLPPKTEQYVELHKGEVVDVMVIGRL	lcl|GPHN_92:1026-1736_ORF2_GPHN_92:1025:1735	['GPHN_201_ORF2', 'GPHN_92_ORF2']
GPHN_93	ORF1	680	74.03	GPHN	E40	ATGGCGACCGAGGGA	ATGGCGACCGAGGGAATGATCCTCACCAACCACGACCATCAAATCCGTGTCGGAGTCCTCACAGTGAGTGATAGCTGCTTCAGGAATCTTGCAGAAGACCGCAGTGGGATAAATCTAAAAGATCTTGTCCAAGATCCTTCTTTGTTGGGTGGGACTATATCGGCATACAAGATAGTACCAGATGAAATAGAAGAAATCAAGGAAACACTCATAGACTGGTGTGATGAAAAGGAACTTAATTTAATATTAACAACTGGAGGAACGGGGTTTGCACCACGAGATGTCACTCCAGAGGCCACAAAAGAAGTAATAGAGCGGGAAGCGCCAGGGATGGCCCTGGCAATGCTGATGGGATCGCTCAATGTCACACCTCTGGGCATGCTCTCTAGACCAGTGTGT…	MATEGMILTNHDHQIRVGVLTVSDSCFRNLAEDRSGINLKDLVQDPSLLGGTISAYKIVPDEIEEIKETLIDWCDEKELNLILTTGGTGFAPRDVTPEATKEVIEREAPGMALAMLMGSLNVTPLGMLSRPVCGIRGKTLIINLPGSKKGSQIPDSIISRGVQVLPRDTASLSTTPSESPRAQATSRLSTASCPTPKARLPSCSSTYSVSELHSRLEGLKDELWRNRGYDLRVQSRCSSKENILRASHSAVDITKVARRHRMSPFPLTSMDKAFITVLEMTPVLGTEIINYRDGMGRVLAQDVYAKDNLPPFPASVKDGYAVRAADGPGDRFIIGESQAGEQPTQTVMPGQVMRVTTGAPIPCGADAVVQVEDTELIRESDDGTEELEVRILVQARPGQ…	lcl|GPHN_93:8-2050_ORF1_GPHN_93:7:2049	['GPHN_93_ORF1']
GPHN_94	ORF1	597	64.68	GPHN	E40	TTGGGTGGGACTATA	TTGGGTGGGACTATATCGGCATACAAGATAGTACCAGATGAAATAGAAGAAATCAAGGAAACACTCATAGACTGGTGTGATGAAAAGGAACTTAATTTAATATTAACAACTGGAGGAACGGGGTTTGCACCACGAGATGTCACTCCAGAGGCCACAAAAGAAGTAATAGAGCGGGAAGCGCCAGGGATGGCCCTGGCAATGCTGATGGGATCGCTCAATGTCACACCTCTGGGCATGCTCTCTAGACCAGTGTGTGGAATAAGGGGGAAAACTCTGATAATTAACCTACCTGGTAGCAAGAAAGGATCTCAGATTCCAGACTCCATCATTTCTCGTGGTGTTCAGGTGCTCCCACGAGACACAGCCTCCCTTAGCACTACTCCTTCAGAATCGCCCCGT…	MGGTISAYKIVPDEIEEIKETLIDWCDEKELNLILTTGGTGFAPRDVTPEATKEVIEREAPGMALAMLMGSLNVTPLGMLSRPVCGIRGKTLIINLPGSKKGSQIPDSIISRGVQVLPRDTASLSTTPSESPRAQATSRLSTASCPTPKVQSRCSSKENILRASHSAVDITKVARRHRMSPFPLTSMDKAFITVLEMTPVLGTEIINYRDGMGRVLAQDVYAKDNLPPFPASVKDGYAVRAADGPGDRFIIGESQAGEQPTQTVMPGQVMRVTTGAPIPCGADAVVQVEDTELIRESDDGTEELEVRILVQARPGQDIRPIGHDIKRGECVLAKGTHMGPSEIGLLATVGVTEVEVNKFPVVAVMSTGNELLNPEDDLLPGKIRDSNRSTLLATIQEHG…	lcl|GPHN_94:73-1866_ORF1_GPHN_94:72:1865	['GPHN_94_ORF1']
GPHN_95	ORF1	100	11.18	unknown	PTC	CTGCAGCAGCTCTTG	CTGCAGCAGCTCTTGCTGCAAAGAAGCATCCATTCTACACCAGTCCTGCTCTTTTCATGGCAAATCATGGGCAGCCCATCCCTGGTCTCATCAGTTATTCCCATCATGCAACAGGCAGTGCAGATAAACGGATTCCAGACTCCATCATTTCTCGTGGTGTTCAGGTGCTCCCACGAGACACAGCCTCCCTTAGCACTACTCCTTCAGAATCGCCCCGTGCTCAGGCTACATCTCGCCTCTCTACAGCTTCTTGTCCAACACCAAAAGTCCAGTCCAGGTGCAGCAGCAAGGAGAACATTCTAA	MQQLLLQRSIHSTPVLLFSWQIMGSPSLVSSVIPIMQQAVQINGFQTPSFLVVFRCSHETQPPLALLLQNRPVLRLHLASLQLLVQHQKSSPGAAARRTF	lcl|GPHN_95:484-786_ORF1_GPHN_95:483:785	['GPHN_105_ORF2', 'GPHN_116_ORF1', 'GPHN_119_ORF1', 'GPHN_143_ORF2', 'GPHN_144_ORF2', 'GPHN_164_ORF1', 'GPHN_171_ORF2', 'GPHN_185_ORF2', 'GPHN_190_ORF2', 'GPHN_241_ORF2', 'GPHN_254_ORF2', 'GPHN_38_ORF2', 'GPHN_4_ORF2', 'GPHN_51_ORF2', 'GPHN_57_ORF2', 'GPHN_77_ORF2', 'GPHN_95_ORF1']
	ORF2	662	71.63	GPHN	E40	ATGGCCCTGGCAATG	ATGGCCCTGGCAATGCTGATGGGATCGCTCAATGTCACACCTCTGGGCATGCTCTCTAGACCAGTGTGTGGAATAAGGGGGAAAACTCTGATAATTAACCTACCTGGTAGCAAGAAAGGATCTCAGGAATGCTTTCAGTTCATACTGCCAGCTCTACCTCATGCCATTGACCTTTTACGTGATGCCATTGTAAAAGTAAAGGAGGTGCATGATGAACTTGAAGATTTACCTTCCCCACCACCTCCTCTCTCTCCACCTCCTACAACTAGCCCACATAAACAGACAGAAGACAAAGGAGTTCAGTGTGAAGAAGAGGAAGAAGAAAAGAAAGACAGTGGTGTAGCTTCAACAGAAGATAGTTCCTCATCACATATAACTGCAGCAGCTCTTGCTGCAAAG…	MALAMLMGSLNVTPLGMLSRPVCGIRGKTLIINLPGSKKGSQECFQFILPALPHAIDLLRDAIVKVKEVHDELEDLPSPPPPLSPPPTTSPHKQTEDKGVQCEEEEEEKKDSGVASTEDSSSSHITAAALAAKKHPFYTSPALFMANHGQPIPGLISYSHHATGSADKRIPDSIISRGVQVLPRDTASLSTTPSESPRAQATSRLSTASCPTPKVQSRCSSKENILRASHSAVDITKVARRHRMSPFPLTSMDKAFITVLEMTPVLGTEIINYRDGMGRVLAQDVYAKDNLPPFPASVKDGYAVRAADGPGDRFIIGESQAGEQPTQTVMPGQVMRVTTGAPIPCGADAVVQVEDTELIRESDDGTEELEVRILVQARPGQDIRPIGHDIKRGECVLAK…	lcl|GPHN_95:108-2096_ORF2_GPHN_95:107:2095	['GPHN_116_ORF2', 'GPHN_95_ORF2']
GPHN_96	ORF1	535	57.9	GPHN	E40	ATGGCCCTGGCAATG	ATGGCCCTGGCAATGCTGATGGGATCGCTCAATGTCACACCTCTGGGCATGCTCTCTAGACCAGTGTGTGGAATAAGGGGGAAAACTCTGATAATTAACCTACCTGGTAGCAAGAAAGGATCTCAGATTCCAGACTCCATCATTTCTCGTGGTGTTCAGGTGCTCCCACGAGACACAGCCTCCCTTAGCACTACTCCTTCAGAATCGCCCCGTGCTCAGGCTACATCTCGCCTCTCTACAGCTTCTTGTCCAACACCAAAAGTCCAGTCCAGGTGCAGCAGCAAGGAGAACATTCTAAGAGCCAGTCACAGTGCTGTAGATATCACCAAGGTGGCTAGAAGACATCGCATGTCTCCTTTTCCCCTGACGTCTATGGACAAAGCCTTCATTACAGTCCTG…	MALAMLMGSLNVTPLGMLSRPVCGIRGKTLIINLPGSKKGSQIPDSIISRGVQVLPRDTASLSTTPSESPRAQATSRLSTASCPTPKVQSRCSSKENILRASHSAVDITKVARRHRMSPFPLTSMDKAFITVLEMTPVLGTEIINYRDGMGRVLAQDVYAKDNLPPFPASVKDGYAVRAADGPGDRFIIGESQAGEQPTQTVMPGQVMRVTTGAPIPCGADAVVQVEDTELIRESDDGTEELEVRILVQARPGQDIRPIGHDIKRGECVLAKGTHMGPSEIGLLATVGVTEVEVNKFPVVAVMSTGNELLNPEDDLLPGKIRDSNRSTLLATIQEHGYPTINLGIVGDNPDDLLNALNEGISRADVIITSGGVSMGEKDYLKQVLDIDLHAQIHFGRVF…	lcl|GPHN_96:108-1715_ORF1_GPHN_96:107:1714	['GPHN_221_ORF1', 'GPHN_96_ORF1']
GPHN_97	ORF1	661	71.29	GPHN	PTC	ATGGCGACCGAGGGA	ATGGCGACCGAGGGAATGATCCTCACCAACCACGACCATCAAATCCGTGTCGGAGTCCTCACAGTGAGTGATAGCTGCTTCAGGAATCTTGCAGAAGACCGCAGTGGGATAAATCTAAAAGATCTTGTCCAAGATCCTTCTTTGTTGGGTGGGACTATATCGGCATACAAGATAGTACCAGATGAAATAGAAGAAATCAAGGAAACACTCATAGACTGGTGTGATGAAAAGGAACTTAATTTAATATTAACAACTGGAGGAACGGGGTTTGCACCACGAGATGTCACTCCAGAGGCCACAAAAGAAGTAATAGAGCGGGAAGCGCCAGGGATGGCCCTGGCAATGCTGATGGGATCGCTCAATGTCACACCTCTGGGCATGCTCTCTAGACCAGTGTGT…	MATEGMILTNHDHQIRVGVLTVSDSCFRNLAEDRSGINLKDLVQDPSLLGGTISAYKIVPDEIEEIKETLIDWCDEKELNLILTTGGTGFAPRDVTPEATKEVIEREAPGMALAMLMGSLNVTPLGMLSRPVCGIRGKTLIINLPGSKKGSQECFQFILPALPHAIDLLRDAIVKVKEVHDELEDLPSPPPPLSPPPTTSPHKQTEDKGVQCEEEEEEKKDSGVASTEDSSSSHITAAALAAKIPDSIISRGVQVLPRDTASLSTTPSESPRAQATSRLSTASCPTPKQIRRPDESKGVASRVGSLKYLLSLGDFVHKTFKVQSRCSSKENILRASHSAVDITKVARRHRMSPFPLTSMDKAFITVLEMTPVLGTEIINYRDGMGRVLAQDVYAKDNLP…	lcl|GPHN_97:8-1993_ORF1_GPHN_97:7:1992	['GPHN_97_ORF1']
GPHN_98	ORF1	817	89.01	GPHN	E40	ATGGCGACCGAGGGA	ATGGCGACCGAGGGAATGATCCTCACCAACCACGACCATCAAATCCGTGTCGGAGTCCTCACAGTGAGTGATAGCTGCTTCAGGAATCTTGCAGAAGACCGCAGTGGGATAAATCTAAAAGATCTTGTCCAAGATCCTTCTTTGTTGGGTGGGACTATATCGGCATACAAGATAGTACCAGATGAAATAGAAGAAATCAAGGAAACACTCATAGACTGGTGTGATGAAAAGGAACTTAATTTAATATTAACAACTGGAGGAACGGGGTTTGCACCACGAGATGTCACTCCAGAGAAATTCCCAACATTCCCATTTTGTGGGCTCCAGAAAGGGGCCACAAAAGAAGTAATAGAGCGGGAAGCGCCAGGGATGGCCCTGGCAATGCTGATGGGATCGCTC…	MATEGMILTNHDHQIRVGVLTVSDSCFRNLAEDRSGINLKDLVQDPSLLGGTISAYKIVPDEIEEIKETLIDWCDEKELNLILTTGGTGFAPRDVTPEKFPTFPFCGLQKGATKEVIEREAPGMALAMLMGSLNVTPLGMLSRPVCGIRGKTLIINLPGSKKGSQECFQFILPALPHAIDLLRDAIVKVKEVHDELEDLPSPPPPLSPPPTTSPHKQTEDKGVQCEEEEEEKKDSGVASTEDSSSSHITAAALAAKIPDSIISRGVQVLPRDTASLSTTPSESPRAQATSRLSTASCPTPKQIRRPDESKGVASRVGSLKYLLSLGDFVHKTFKARLPSCSSTYSVSELHSRLEGLKDELWRNRGYDLRVQSRCSSKENILRASHSAVDITKVARRHRM…	lcl|GPHN_98:8-2461_ORF1_GPHN_98:7:2460	['GPHN_98_ORF1']
	ORF2	119	13.9	unknown	PTC	CTGCAGCAGCTCTTG	CTGCAGCAGCTCTTGCTGCAAAGATTCCAGACTCCATCATTTCTCGTGGTGTTCAGGTGCTCCCACGAGACACAGCCTCCCTTAGCACTACTCCTTCAGAATCGCCCCGTGCTCAGGCTACATCTCGCCTCTCTACAGCTTCTTGTCCAACACCAAAACAAATTAGACGGCCGGATGAAAGCAAAGGAGTTGCTAGTAGAGTTGGATCCCTCAAATATCTATTATCACTGGGAGATTTTGTACATAAAACATTTAAGGCTCGGCTTCCGTCGTGCTCATCTACCTATAGTGTATCTGAGCTCCACTCTAGATTGGAAGGGCTTAAAGATGAACTCTGGAGGAATAGAGGCTACGACTTAA	MQQLLLQRFQTPSFLVVFRCSHETQPPLALLLQNRPVLRLHLASLQLLVQHQNKLDGRMKAKELLVELDPSNIYYHWEILYIKHLRLGFRRAHLPIVYLSSTLDWKGLKMNSGGIEATT	lcl|GPHN_98:753-1112_ORF2_GPHN_98:752:1111	['GPHN_162_ORF2', 'GPHN_58_ORF2', 'GPHN_98_ORF2']
GPHN_99	ORF1	676	72.84	GPHN	E40	ATGGCGACCGAGGGA	ATGGCGACCGAGGGAATGATCCTCACCAACCACGACCATCAAATCCGTGTCGGAGTCCTCACAGTGAGTGATAGCTGCTTCAGGAATCTTGCAGAAGACCGCAGTGGGATAAATCTAAAAGATCTTGTCCAAGATCCTTCTTTGTTGGGTGGGACTATATCGGCATACAAGATAGTACCAGATGAAATAGAAGAAATCAAGGAAACACTCATAGACTGGTGTGATGAAAAGGAACTTAATTTAATATTAACAACTGGAGGAACGGGGTTTGCACCACGAGATGTCACTCCAGAGAAATTCCCAACATTCCCATTTTGTGGGCTCCAGAAAGGGGCCACAAAAGAAGTAATAGAGCGGGAAGCGCCAGGGATGGCCCTGGCAATGCTGATGGGATCGCTC…	MATEGMILTNHDHQIRVGVLTVSDSCFRNLAEDRSGINLKDLVQDPSLLGGTISAYKIVPDEIEEIKETLIDWCDEKELNLILTTGGTGFAPRDVTPEKFPTFPFCGLQKGATKEVIEREAPGMALAMLMGSLNVTPLGMLSRPVCGIRGKTLIINLPGSKKGSQECFQFILPALPHAIDLLRDAIVKVKEVHDELEDLPSPPPPLSPPPTTSPHKQTEDKGVQCEEEEEEKKDSGVASTEDSSSSHITAAALAAKIPDSIISRGVQVLPRDTASLSTTPSESPRAQATSRLSTASCPTPKVQSRCSSKENILRASHSAVDITKVARRHRMSPFPLTSMDKAFITVLEMTPVLGTEIINYRDGMGRVLAQDVYAKDNLPPFPASVKDGYAVRAADGPGD…	lcl|GPHN_99:8-2038_ORF1_GPHN_99:7:2037	['GPHN_99_ORF1']
GPHN_100	ORF1	439	47.89	GPHN	E40	TTGTCCAACACCAAA	TTGTCCAACACCAAAAGTCACAGTGCTGTAGATATCACCAAGGTGGCTAGAAGACATCGCATGTCTCCTTTTCCCCTGACGTCTATGGACAAAGCCTTCATTACAGTCCTGGAGATGACTCCGGTGCTTGGTACAGAAATCATCAATTACCGAGATGGAATGGGGCGAGTCCTTGCTCAAGATGTATATGCAAAAGACAACCTACCCCCATTCCCTGCATCAGTAAAAGATGGCTATGCTGTTCGAGCTGCTGATGGTCCAGGGGATCGTTTCATCATTGGGGAATCCCAAGCTGGTGAGCAGCCAACTCAGACAGTAATGCCAGGACAAGTGATGCGGGTTACAACAGGTGCTCCAATCCCCTGCGGTGCTGATGCAGTAGTGCAAGTTGAAGATACT…	MSNTKSHSAVDITKVARRHRMSPFPLTSMDKAFITVLEMTPVLGTEIINYRDGMGRVLAQDVYAKDNLPPFPASVKDGYAVRAADGPGDRFIIGESQAGEQPTQTVMPGQVMRVTTGAPIPCGADAVVQVEDTELIRESDDGTEELEVRILVQARPGQDIRPIGHDIKRGECVLAKGTHMGPSEIGLLATVGVTEVEVNKFPVVAVMSTGNELLNPEDDLLPGKIRDSNRSTLLATIQEHGYPTINLGIVGDNPDDLLNALNEGISRADVIITSGGVSMGEKDYLKQVLDIDLHAQIHFGRVFMKPGLPTTFATLDIDGVRKIIFALPGNPVSAVVTCNLFVVPALRKMQGILDPRPTIIKARLSCDVKLDPRPEYHRCILTWHHQEPLPWAQSTGNQM…	lcl|GPHN_100:895-2214_ORF1_GPHN_100:894:2213	['GPHN_100_ORF1', 'GPHN_101_ORF1', 'GPHN_151_ORF1', 'GPHN_17_ORF1', 'GPHN_182_ORF2', 'GPHN_244_ORF1', 'GPHN_67_ORF1']
	ORF2	305	32.74	GPHN	PTC	ATGGCGACCGAGGGA	ATGGCGACCGAGGGAATGATCCTCACCAACCACGACCATCAAATCCGTGTCGGAGTCCTCACAGTGAGTGATAGCTGCTTCAGGAATCTTGCAGAAGACCGCAGTGGGATAAATCTAAAAGATCTTGTCCAAGATCCTTCTTTGTTGGGTGGGACTATATCGGCATACAAGATAGTACCAGATGAAATAGAAGAAATCAAGGAAACACTCATAGACTGGTGTGATGAAAAGGAACTTAATTTAATATTAACAACTGGAGGAACGGGGTTTGCACCACGAGATGTCACTCCAGAGAAATTCCCAACATTCCCATTTTGTGGGCTCCAGAAAGGGGCCACAAAAGAAGTAATAGAGCGGGAAGCGCCAGGGATGGCCCTGGCAATGCTGATGGGATCGCTC…	MATEGMILTNHDHQIRVGVLTVSDSCFRNLAEDRSGINLKDLVQDPSLLGGTISAYKIVPDEIEEIKETLIDWCDEKELNLILTTGGTGFAPRDVTPEKFPTFPFCGLQKGATKEVIEREAPGMALAMLMGSLNVTPLGMLSRPVCGIRGKTLIINLPGSKKGSQECFQFILPALPHAIDLLRDAIVKVKEVHDELEDLPSPPPPLSPPPTTSPHKQTEDKGVQCEEEEEEKKDSGVASTEDSSSSHITAAALAAKIPDSIISRGVQVLPRDTASLSTTPSESPRAQATSRLSTASCPTPKVTVL	lcl|GPHN_100:8-925_ORF2_GPHN_100:7:924	['GPHN_100_ORF2', 'GPHN_220_ORF2']
GPHN_101	ORF1	439	47.89	GPHN	E40	TTGTCCAACACCAAA	TTGTCCAACACCAAAAGTCACAGTGCTGTAGATATCACCAAGGTGGCTAGAAGACATCGCATGTCTCCTTTTCCCCTGACGTCTATGGACAAAGCCTTCATTACAGTCCTGGAGATGACTCCGGTGCTTGGTACAGAAATCATCAATTACCGAGATGGAATGGGGCGAGTCCTTGCTCAAGATGTATATGCAAAAGACAACCTACCCCCATTCCCTGCATCAGTAAAAGATGGCTATGCTGTTCGAGCTGCTGATGGTCCAGGGGATCGTTTCATCATTGGGGAATCCCAAGCTGGTGAGCAGCCAACTCAGACAGTAATGCCAGGACAAGTGATGCGGGTTACAACAGGTGCTCCAATCCCCTGCGGTGCTGATGCAGTAGTGCAAGTTGAAGATACT…	MSNTKSHSAVDITKVARRHRMSPFPLTSMDKAFITVLEMTPVLGTEIINYRDGMGRVLAQDVYAKDNLPPFPASVKDGYAVRAADGPGDRFIIGESQAGEQPTQTVMPGQVMRVTTGAPIPCGADAVVQVEDTELIRESDDGTEELEVRILVQARPGQDIRPIGHDIKRGECVLAKGTHMGPSEIGLLATVGVTEVEVNKFPVVAVMSTGNELLNPEDDLLPGKIRDSNRSTLLATIQEHGYPTINLGIVGDNPDDLLNALNEGISRADVIITSGGVSMGEKDYLKQVLDIDLHAQIHFGRVFMKPGLPTTFATLDIDGVRKIIFALPGNPVSAVVTCNLFVVPALRKMQGILDPRPTIIKARLSCDVKLDPRPEYHRCILTWHHQEPLPWAQSTGNQM…	lcl|GPHN_101:964-2283_ORF1_GPHN_101:963:2282	['GPHN_100_ORF1', 'GPHN_101_ORF1', 'GPHN_151_ORF1', 'GPHN_17_ORF1', 'GPHN_182_ORF2', 'GPHN_244_ORF1', 'GPHN_67_ORF1']
	ORF2	328	35.21	GPHN	PTC	ATGGCGACCGAGGGA	ATGGCGACCGAGGGAATGATCCTCACCAACCACGACCATCAAATCCGTGTCGGAGTCCTCACAGTGAGTGATAGCTGCTTCAGGAATCTTGCAGAAGACCGCAGTGGGATAAATCTAAAAGATCTTGTCCAAGATCCTTCTTTGTTGGGTGGGACTATATCGGCATACAAGATAGTACCAGATGAAATAGAAGAAATCAAGGAAACACTCATAGACTGGTGTGATGAAAAGGAACTTAATTTAATATTAACAACTGGAGGAACGGGGTTTGCACCACGAGATGTCACTCCAGAGGCCACAAAAGAAGTAATAGAGCGGGAAGCGCCAGGGATGGCCCTGGCAATGCTGATGGGATCGCTCAATGTCACACCTCTGGGCATGCTCTCTAGACCAGTGTGT…	MATEGMILTNHDHQIRVGVLTVSDSCFRNLAEDRSGINLKDLVQDPSLLGGTISAYKIVPDEIEEIKETLIDWCDEKELNLILTTGGTGFAPRDVTPEATKEVIEREAPGMALAMLMGSLNVTPLGMLSRPVCGIRGKTLIINLPGSKKGSQECFQFILPALPHAIDLLRDAIVKVKEVHDELEDLPSPPPPLSPPPTTSPHKQTEDKGVQCEEEEEEKKDSGVASTEDSSSSHITAAALAAKKHPFYTSPALFMANHGQPIPGLISYSHHATGSADKRIPDSIISRGVQVLPRDTASLSTTPSESPRAQATSRLSTASCPTPKVTVL	lcl|GPHN_101:8-994_ORF2_GPHN_101:7:993	['GPHN_101_ORF2']
GPHN_102	ORF1	393	42.67	GPHN	E40	TTGTCCAACACCAAA	TTGTCCAACACCAAAAATGGAATGGGGCGAGTCCTTGCTCAAGATGTATATGCAAAAGACAACCTACCCCCATTCCCTGCATCAGTAAAAGATGGCTATGCTGTTCGAGCTGCTGATGGTCCAGGGGATCGTTTCATCATTGGGGAATCCCAAGCTGGTGAGCAGCCAACTCAGACAGTAATGCCAGGACAAGTGATGCGGGTTACAACAGGTGCTCCAATCCCCTGCGGTGCTGATGCAGTAGTGCAAGTTGAAGATACTGAACTCATCAGGGAATCAGATGATGGTACTGAAGAACTTGAAGTACGAATTCTGGTGCAAGCTCGGCCAGGCCAAGATATCCGACCCATCGGCCATGACATTAAGAGAGGGGAGTGTGTTTTGGCCAAAGGAACCCAT…	MSNTKNGMGRVLAQDVYAKDNLPPFPASVKDGYAVRAADGPGDRFIIGESQAGEQPTQTVMPGQVMRVTTGAPIPCGADAVVQVEDTELIRESDDGTEELEVRILVQARPGQDIRPIGHDIKRGECVLAKGTHMGPSEIGLLATVGVTEVEVNKFPVVAVMSTGNELLNPEDDLLPGKIRDSNRSTLLATIQEHGYPTINLGIVGDNPDDLLNALNEGISRADVIITSGGVSMGEKDYLKQVLDIDLHAQIHFGRVFMKPGLPTTFATLDIDGVRKIIFALPGNPVSAVVTCNLFVVPALRKMQGILDPRPTIIKARLSCDVKLDPRPEYHRCILTWHHQEPLPWAQSTGNQMSSRLMSMRSANGLLMLPPKTEQYVELHKGEVVDVMVIGRL	lcl|GPHN_102:856-2037_ORF1_GPHN_102:855:2036	['GPHN_102_ORF1']
	ORF2	311	33.7	GPHN	PTC	ATGGCGACCGAGGGA	ATGGCGACCGAGGGAATGATCCTCACCAACCACGACCATCAAATCCGTGTCGGAGTCCTCACAGTGAGTGATAGCTGCTTCAGGAATCTTGCAGAAGACCGCAGTGGGATAAATCTAAAAGATCTTGTCCAAGATCCTTCTTTGTTGGGTGGGACTATATCGGCATACAAGATAGTACCAGATGAAATAGAAGAAATCAAGGAAACACTCATAGACTGGTGTGATGAAAAGGAACTTAATTTAATATTAACAACTGGAGGAACGGGGTTTGCACCACGAGATGTCACTCCAGAGGCCACAAAAGAAGTAATAGAGCGGGAAGCGCCAGGGATGGCCCTGGCAATGCTGATGGGATCGCTCAATGTCACACCTCTGGGCATGCTCTCTAGACCAGTGTGT…	MATEGMILTNHDHQIRVGVLTVSDSCFRNLAEDRSGINLKDLVQDPSLLGGTISAYKIVPDEIEEIKETLIDWCDEKELNLILTTGGTGFAPRDVTPEATKEVIEREAPGMALAMLMGSLNVTPLGMLSRPVCGIRGKTLIINLPGSKKGSQECFQFILPALPHAIDLLRDAIVKVKEVHDELEDLPSPPPPLSPPPTTSPHKQTEDKGVQCEEEEEEKKDSGVASTEDSSSSHITAAALAAKIPDSIISRGVQVLPRDTASLSTTPSESPRAQATSRLSTASCPTPKMEWGESLLKMYMQKTTYPHSLHQ	lcl|GPHN_102:8-943_ORF2_GPHN_102:7:942	['GPHN_102_ORF2']
GPHN_103	ORF1	759	82.67	GPHN	E40	ATGGCGACCGAGGGA	ATGGCGACCGAGGGAATGATCCTCACCAACCACGACCATCAAATCCGTGTCGGAGTCCTCACAGTGAGTGATAGCTGCTTCAGGAATCTTGCAGAAGACCGCAGTGGGATAAATCTAAAAGATCTTGTCCAAGATCCTTCTTTGTTGGGTGGGACTATATCGGCATACAAGATAGTACCAGATGAAATAGAAGAAATCAAGGCCACAAAAGAAGTAATAGAGCGGGAAGCGCCAGGGATGGCCCTGGCAATGCTGATGGGATCGCTCAATGTCACACCTCTGGGCATGCTCTCTAGACCAGTGTGTGGAATAAGGGGGAAAACTCTGATAATTAACCTACCTGGTAGCAAGAAAGGATCTCAGGAATGCTTTCAGTTCATACTGCCAGCTCTACCTCAT…	MATEGMILTNHDHQIRVGVLTVSDSCFRNLAEDRSGINLKDLVQDPSLLGGTISAYKIVPDEIEEIKATKEVIEREAPGMALAMLMGSLNVTPLGMLSRPVCGIRGKTLIINLPGSKKGSQECFQFILPALPHAIDLLRDAIVKVKEVHDELEDLPSPPPPLSPPPTTSPHKQTEDKGVQCEEEEEEKKDSGVASTEDSSSSHITAAALAAKIPDSIISRGVQVLPRDTASLSTTPSESPRAQATSRLSTASCPTPKQIRRPDESKGVASRVGSLKYLLSLGDFVHKTFKLHSRLEGLKDELWRNRGYDLRVQSRCSSKENILRASHSAVDITKVARRHRMSPFPLTSMDKAFITVLEMTPVLGTEIINYRDGMGRVLAQDVYAKDNLPPFPASVKDGY…	lcl|GPHN_103:8-2287_ORF1_GPHN_103:7:2286	['GPHN_103_ORF1']
	ORF2	105	12.21	unknown	PTC	CTGCAGCAGCTCTTG	CTGCAGCAGCTCTTGCTGCAAAGATTCCAGACTCCATCATTTCTCGTGGTGTTCAGGTGCTCCCACGAGACACAGCCTCCCTTAGCACTACTCCTTCAGAATCGCCCCGTGCTCAGGCTACATCTCGCCTCTCTACAGCTTCTTGTCCAACACCAAAACAAATTAGACGGCCGGATGAAAGCAAAGGAGTTGCTAGTAGAGTTGGATCCCTCAAATATCTATTATCACTGGGAGATTTTGTACATAAAACATTTAAGCTCCACTCTAGATTGGAAGGGCTTAAAGATGAACTCTGGAGGAATAGAGGCTACGACTTAA	MQQLLLQRFQTPSFLVVFRCSHETQPPLALLLQNRPVLRLHLASLQLLVQHQNKLDGRMKAKELLVELDPSNIYYHWEILYIKHLSSTLDWKGLKMNSGGIEATT	lcl|GPHN_103:621-938_ORF2_GPHN_103:620:937	['GPHN_103_ORF2', 'GPHN_12_ORF2', 'GPHN_178_ORF2', 'GPHN_180_ORF1', 'GPHN_263_ORF2', 'GPHN_273_ORF2', 'GPHN_48_ORF2']
GPHN_104	ORF1	154	16.6	GPHN	PTC	ATGGCGACCGAGGGA	ATGGCGACCGAGGGAATGATCCTCACCAACCACGACCATCAAATCCGTGTCGGAGTCCTCACAGTGAGTGATAGCTGCTTCAGGAATCTTGCAGAAGACCGCAGTGGGATAAATCTAAAAGATCTTGTCCAAGATCCTTCTTTGTTGGGTGGGACTATATCGGCATACAAGATAGTACCAGATGAAATAGAAGAAATCAAGGAAACACTCATAGACTGGTGTGATGAAAAGGAACTTAATTTAATATTAACAACTGGAGGAACGGGGTTTGCACCACGAGATGTCACTCCAGAGGCCACAAAAGAAGTAATAGAGCGGGAAGCGCCAGGGATGGCCCTGGCAATGCTGATGGGATCGCTCAATGTCACACCTCTGGGCATGCTCTCTAGACCAGTGTGT…	MATEGMILTNHDHQIRVGVLTVSDSCFRNLAEDRSGINLKDLVQDPSLLGGTISAYKIVPDEIEEIKETLIDWCDEKELNLILTTGGTGFAPRDVTPEATKEVIEREAPGMALAMLMGSLNVTPLGMLSRPVCGIRGKTLIINLPGSKKGSQPT	lcl|GPHN_104:8-472_ORF1_GPHN_104:7:471	['GPHN_104_ORF1', 'GPHN_119_ORF2', 'GPHN_169_ORF2', 'GPHN_209_ORF1', 'GPHN_55_ORF1', 'GPHN_80_ORF1']
	ORF2	227	25.15	GPHN	E40	CTGCTAAATCCTGAA	CTGCTAAATCCTGAAGATGATCTCTTACCAGGAAAGATTCGGGACAGCAATCGATCAACACTTCTAGCAACAATTCAGGAACATGGTTACCCAACAATCAACCTGGGAATTGTAGGAGACAACCCAGATGACTTACTCAATGCCTTGAATGAGGGTATCAGCCGTGCTGATGTCATCATCACGTCAGGAGGTGTGTCCATGGGGGAAAAGGACTATCTCAAGCAGGTGCTGGACATTGATCTTCATGCTCAGATCCATTTTGGCAGAGTTTTTATGAAGCCAGGCTTGCCAACAACATTTGCAACTTTGGATATTGATGGTGTAAGAAAAATTATTTTTGCACTACCAGGGAATCCTGTATCAGCTGTGGTCACCTGCAACCTCTTTGTTGTACCTGCA…	MLNPEDDLLPGKIRDSNRSTLLATIQEHGYPTINLGIVGDNPDDLLNALNEGISRADVIITSGGVSMGEKDYLKQVLDIDLHAQIHFGRVFMKPGLPTTFATLDIDGVRKIIFALPGNPVSAVVTCNLFVVPALRKMQGILDPRPTIIKARLSCDVKLDPRPEYHRCILTWHHQEPLPWAQSTGNQMSSRLMSMRSANGLLMLPPKTEQYVELHKGEVVDVMVIGRL	lcl|GPHN_104:1238-1921_ORF2_GPHN_104:1237:1920	['GPHN_104_ORF2', 'GPHN_186_ORF1', 'GPHN_195_ORF3', 'GPHN_197_ORF2', 'GPHN_247_ORF1', 'GPHN_255_ORF1', 'GPHN_275_ORF2', 'GPHN_64_ORF1', 'GPHN_88_ORF1']
	ORF3	267	28.72	GPHN	PTC	CTGGTAGCAAGAAAG	CTGGTAGCAAGAAAGGATCTCAGCCCACATAAACAGACAGAAGACAAAGGAGTTCAGTGTGAAGAAGAGGAAGAAGAAAAGAAAGACAGTGGTGTAGCTTCAACAGAAGATAGTTCCTCATCACATATAACTGCAGCAGCTCTTGCTGCAAAGATTCCAGACTCCATCATTTCTCGTGGTGTTCAGGTGCTCCCACGAGACACAGCCTCCCTTAGCACTACTCCTTCAGAATCGCCCCGTGCTCAGGCTACATCTCGCCTCTCTACAGCTTCTTGTCCAACACCAAAAGTCCAGTCCAGGTGCAGCAGCAAGGAGAACATTCTAAGAGCCAGTCACAGTGCTGTAGATATCACCAAGGTGGCTAGAAGACATCGCATGTCTCCTTTTCCCCTGACGTCT…	MVARKDLSPHKQTEDKGVQCEEEEEEKKDSGVASTEDSSSSHITAAALAAKIPDSIISRGVQVLPRDTASLSTTPSESPRAQATSRLSTASCPTPKVQSRCSSKENILRASHSAVDITKVARRHRMSPFPLTSMDKAFITVLEMTPVLGTEIINYRDGMGRVLAQDVYAKDNLPPFPASVKDGYAVRAADGPGDRFIIGESQAGEQPTQTVMPGQVMRVTTGAPIPCGADAVVQVEDTELIRESDDGTEELEVRILVQARPGQDIRC	lcl|GPHN_104:441-1244_ORF3_GPHN_104:440:1243	['GPHN_104_ORF3']
GPHN_105	ORF1	724	78.4	GPHN	E40	TTGGGTGGGACTATA	TTGGGTGGGACTATATCGGCATACAAGATAGTACCAGATGAAATAGAAGAAATCAAGGAAACACTCATAGACTGGTGTGATGAAAAGGAACTTAATTTAATATTAACAACTGGAGGAACGGGGTTTGCACCACGAGATGTCACTCCAGAGGCCACAAAAGAAGTAATAGAGCGGGAAGCGCCAGGGATGGCCCTGGCAATGCTGATGGGATCGCTCAATGTCACACCTCTGGGCATGCTCTCTAGACCAGTGTGTGGAATAAGGGGGAAAACTCTGATAATTAACCTACCTGGTAGCAAGAAAGGATCTCAGGAATGCTTTCAGTTCATACTGCCAGCTCTACCTCATGCCATTGACCTTTTACGTGATGCCATTGTAAAAGTAAAGGAGGTGCATGAT…	MGGTISAYKIVPDEIEEIKETLIDWCDEKELNLILTTGGTGFAPRDVTPEATKEVIEREAPGMALAMLMGSLNVTPLGMLSRPVCGIRGKTLIINLPGSKKGSQECFQFILPALPHAIDLLRDAIVKVKEVHDELEDLPSPPPPLSPPPTTSPHKQTEDKGVQCEEEEEEKKDSGVASTEDSSSSHITAAALAAKKHPFYTSPALFMANHGQPIPGLISYSHHATGSADKRIPDSIISRGVQVLPRDTASLSTTPSESPRAQATSRLSTASCPTPKVQSRCSSKENILRASHSAVDITKVARRHRMSPFPLTSMDKAFITVLEMTPVLGTEIINYRDGMGRVLAQDVYAKDNLPPFPASVKDGYAVRAADGPGDRFIIGESQAGEQPTQTVMPGQVMRV…	lcl|GPHN_105:73-2247_ORF1_GPHN_105:72:2246	['GPHN_105_ORF1']
	ORF2	100	11.18	unknown	PTC	CTGCAGCAGCTCTTG	CTGCAGCAGCTCTTGCTGCAAAGAAGCATCCATTCTACACCAGTCCTGCTCTTTTCATGGCAAATCATGGGCAGCCCATCCCTGGTCTCATCAGTTATTCCCATCATGCAACAGGCAGTGCAGATAAACGGATTCCAGACTCCATCATTTCTCGTGGTGTTCAGGTGCTCCCACGAGACACAGCCTCCCTTAGCACTACTCCTTCAGAATCGCCCCGTGCTCAGGCTACATCTCGCCTCTCTACAGCTTCTTGTCCAACACCAAAAGTCCAGTCCAGGTGCAGCAGCAAGGAGAACATTCTAA	MQQLLLQRSIHSTPVLLFSWQIMGSPSLVSSVIPIMQQAVQINGFQTPSFLVVFRCSHETQPPLALLLQNRPVLRLHLASLQLLVQHQKSSPGAAARRTF	lcl|GPHN_105:635-937_ORF2_GPHN_105:634:936	['GPHN_105_ORF2', 'GPHN_116_ORF1', 'GPHN_119_ORF1', 'GPHN_143_ORF2', 'GPHN_144_ORF2', 'GPHN_164_ORF1', 'GPHN_171_ORF2', 'GPHN_185_ORF2', 'GPHN_190_ORF2', 'GPHN_241_ORF2', 'GPHN_254_ORF2', 'GPHN_38_ORF2', 'GPHN_4_ORF2', 'GPHN_51_ORF2', 'GPHN_57_ORF2', 'GPHN_77_ORF2', 'GPHN_95_ORF1']
GPHN_106	ORF1	621	67.9	GPHN	E40	ATGGCGACCGAGGGA	ATGGCGACCGAGGGAATGATCCTCACCAACCACGACCATCAAATCCGTGTCGGAGTCCTCACAGTGAGTGATAGCTGCTTCAGGAATCTTGCAGAAGACCGCAGTGGGATAAATCTAAAAGATCTTGTCCAAGATCCTTCTTTGTTGGGTGGGACTATATCGGCATACAAGATAGTACCAGATGAAATAGAAGAAATCAAGGAAACACTCATAGACTGGTGTGATGAAAAGGAACTTAATTTAATATTAACAACTGGAGGAACGGGGTTTGCACCACGAGATGTCACTCCAGAGGCCACAAAAGAAGTAATAGAGCGGGAAGCGCCAGGGATGGCCCTGGCAATGCTGATGGGATCGCTCAATGTCACACCTCTGGGCATGCTCTCTAGACCAGTGTGT…	MATEGMILTNHDHQIRVGVLTVSDSCFRNLAEDRSGINLKDLVQDPSLLGGTISAYKIVPDEIEEIKETLIDWCDEKELNLILTTGGTGFAPRDVTPEATKEVIEREAPGMALAMLMGSLNVTPLGMLSRPVCGIRGKTLIINLPGSKKGSQLHSRLEGLKDELWRNRGYDLRVQSRCSSKENILRASHSAVDITKVARRHRMSPFPLTSMDKAFITVLEMTPVLGTEIINYRDGMGRVLAQDVYAKDNLPPFPASVKDGYAVRAADGPGDRFIIGESQAGEQPTQTVMPGQVMRVTTGAPIPCGADAVVQVEDTELIRESDDGTEELEVRILVQARPGQDIRPIGHDIKRGECVLAKGTHMGPSEIGLLATVGVTEVEVNKFPVVAVMSTGNELLNPE…	lcl|GPHN_106:8-1873_ORF1_GPHN_106:7:1872	['GPHN_106_ORF1']
GPHN_107	ORF1	639	69.19	GPHN	E40	ATGGCGACCGAGGGA	ATGGCGACCGAGGGAATGATCCTCACCAACCACGACCATCAAATCCGTGTCGGAGTCCTCACAGTGAGTGATAGCTGCTTCAGGAATCTTGCAGAAGACCGCAGTGGGATAAATCTAAAAGATCTTGTCCAAGATCCTTCTTTGTTGGGTGGGACTATATCGGCATACAAGATAGTACCAGATGAAATAGAAGAAATCAAGGAAACACTCATAGACTGGTGTGATGAAAAGGAACTTAATTTAATATTAACAACTGGAGGAACGGGGTTTGCACCACGAGATGTCACTCCAGAGAAATTCCCAACATTCCCATTTTGTGGGCTCCAGAAAGGGGCCACAAAAGAAGTAATAGAGCGGGAAGCGCCAGGGATGGCCCTGGCAATGCTGATGGGATCGCTC…	MATEGMILTNHDHQIRVGVLTVSDSCFRNLAEDRSGINLKDLVQDPSLLGGTISAYKIVPDEIEEIKETLIDWCDEKELNLILTTGGTGFAPRDVTPEKFPTFPFCGLQKGATKEVIEREAPGMALAMLMGSLNVTPLGMLSRPVCGIRGKTLIINLPGSKKGSQECFQFILPALPHAIDLLRDAIVKVKEVHDELEDLPSPPPPLSPPPTTSPHKQTEDKGVQCEEEEEEKKDSGVASTEDSSSSHITAAALAAKIPDSIISRGVQVLPRDTASLSTTPSESPRAQATSRLSTASCPTPKPTQTVMPGQVMRVTTGAPIPCGADAVVQVEDTELIRESDDGTEELEVRILVQARPGQDIRPIGHDIKRGECVLAKGTHMGPSEIGLLATVGVTEVEVN…	lcl|GPHN_107:8-1927_ORF1_GPHN_107:7:1926	['GPHN_107_ORF1']
GPHN_108	ORF1	626	67.71	GPHN	E40	ATGGCCCTGGCAATG	ATGGCCCTGGCAATGCTGATGGGATCGCTCAATGTCACACCTCTGGGCATGCTCTCTAGACCAGTGTGTGGAATAAGGGGGAAAACTCTGATAATTAACCTACCTGGTAGCAAGAAAGGATCTCAGGAATGCTTTCAGTTCATACTGCCAGCTCTACCTCATGCCATTGACCTTTTACGTGATGCCATTGTAAAAGTAAAGGAGGTGCATGATGAACTTGAAGATTTACCTTCCCCACCACCTCCTCTCTCTCCACCTCCTACAACTAGCCCACATAAACAGACAGAAGACAAAGGAGTTCAGTGTGAAGAAGAGGAAGAAGAAAAGAAAGACAGTGGTGTAGCTTCAACAGAAGATAGTTCCTCATCACATATAACTGCAGCAGCTCTTGCTGCAAAG…	MALAMLMGSLNVTPLGMLSRPVCGIRGKTLIINLPGSKKGSQECFQFILPALPHAIDLLRDAIVKVKEVHDELEDLPSPPPPLSPPPTTSPHKQTEDKGVQCEEEEEEKKDSGVASTEDSSSSHITAAALAAKIPDSIISRGVQVLPRDTASLSTTPSESPRAQATSRLSTASCPTPKVQSRCSSKENILRASHSAVDITKVARRHRMSPFPLTSMDKAFITVLEMTPVLGTEIINYRDGMGRVLAQDVYAKDNLPPFPASVKDGYAVRAADGPGDRFIIGESQAGEQPTQTVMPGQVMRVTTGAPIPCGADAVVQVEDTELIRESDDGTEELEVRILVQARPGQDIRPIGHDIKRGECVLAKGTHMGPSEIGLLATVGVTEVEVNKFPVVAVMSTGNE…	lcl|GPHN_108:446-2326_ORF1_GPHN_108:445:2325	['GPHN_108_ORF1', 'GPHN_248_ORF1', 'GPHN_33_ORF1', 'GPHN_37_ORF1']
GPHN_109	ORF1	784	85.29	GPHN	E40	ATGGCGACCGAGGGA	ATGGCGACCGAGGGAATGATCCTCACCAACCACGACCATCAAATCCGTGTCGGAGTCCTCACAGTGAGTGATAGCTGCTTCAGGAATCTTGCAGAAGACCGCAGTGGGATAAATCTAAAAGATCTTGTCCAAGATCCTTCTTTGTTGGGTGGGACTATATCGGCATACAAGATAGTACCAGATGAAATAGAAGAAATCAAGGAAACACTCATAGACTGGTGTGATGAAAAGGAACTTAATTTAATATTAACAACTGGAGGAACGGGGTTTGCACCACGAGATGTCACTCCAGAGAAATTCCCAACATTCCCATTTTGTGGGCTCCAGAAAGGGGCCACAAAAGAAGTAATAGAGCGGGAAGCGCCAGGGATGGCCCTGGCAATGCTGATGGGATCGCTC…	MATEGMILTNHDHQIRVGVLTVSDSCFRNLAEDRSGINLKDLVQDPSLLGGTISAYKIVPDEIEEIKETLIDWCDEKELNLILTTGGTGFAPRDVTPEKFPTFPFCGLQKGATKEVIEREAPGMALAMLMGSLNVTPLGMLSRPVCGIRGKTLIINLPGSKKGSQECFQFILPALPHAIDLLRDAIVKVKEVHDELEDLPSPPPPLSPPPTTSPHKQTEDKGVQCEEEEEEKKDSGVASTEDSSSSHITAAALAAKIPDSIISRGVQVLPRDTASLSTTPSESPRAQATSRLSTASCPTPKARLPSCSSTYSVSELHSRLEGLKDELWRNRGYDLRVQSRCSSKENILRASHSAVDITKVARRHRMSPFPLTSMDKAFITVLEMTPVLGTEIINYRDGM…	lcl|GPHN_109:8-2362_ORF1_GPHN_109:7:2361	['GPHN_109_ORF1']
GPHN_110	ORF1	419	45.61	GPHN	E40	ATGTCTCCTTTTCCC	ATGTCTCCTTTTCCCCTGACGTCTATGGACAAAGCCTTCATTACAGTCCTGGAGATGACTCCGGTGCTTGGTACAGAAATCATCAATTACCGAGATGGAATGGGGCGAGTCCTTGCTCAAGATGTATATGCAAAAGACAACCTACCCCCATTCCCTGCATCAGTAAAAGATGGCTATGCTGTTCGAGCTGCTGATGGTCCAGGGGATCGTTTCATCATTGGGGAATCCCAAGCTGGTGAGCAGCCAACTCAGACAGTAATGCCAGGACAAGTGATGCGGGTTACAACAGGTGCTCCAATCCCCTGCGGTGCTGATGCAGTAGTGCAAGTTGAAGATACTGAACTCATCAGGGAATCAGATGATGGTACTGAAGAACTTGAAGTACGAATTCTGGTGCAA…	MSPFPLTSMDKAFITVLEMTPVLGTEIINYRDGMGRVLAQDVYAKDNLPPFPASVKDGYAVRAADGPGDRFIIGESQAGEQPTQTVMPGQVMRVTTGAPIPCGADAVVQVEDTELIRESDDGTEELEVRILVQARPGQDIRPIGHDIKRGECVLAKGTHMGPSEIGLLATVGVTEVEVNKFPVVAVMSTGNELLNPEDDLLPGKIRDSNRSTLLATIQEHGYPTINLGIVGDNPDDLLNALNEGISRADVIITSGGVSMGEKDYLKQVLDIDLHAQIHFGRVFMKPGLPTTFATLDIDGVRKIIFALPGNPVSAVVTCNLFVVPALRKMQGILDPRPTIIKARLSCDVKLDPRPEYHRCILTWHHQEPLPWAQSTGNQMSSRLMSMRSANGLLMLPPKT…	lcl|GPHN_110:781-2040_ORF1_GPHN_110:780:2039	['GPHN_110_ORF1', 'GPHN_15_ORF1', 'GPHN_173_ORF1', 'GPHN_192_ORF2', 'GPHN_209_ORF3', 'GPHN_227_ORF2', 'GPHN_228_ORF2', 'GPHN_257_ORF1', 'GPHN_264_ORF2', 'GPHN_265_ORF2', 'GPHN_268_ORF2', 'GPHN_30_ORF1', 'GPHN_36_ORF1', 'GPHN_52_ORF1', 'GPHN_80_ORF2']
	ORF2	247	26.63	GPHN	PTC	ATGGCGACCGAGGGA	ATGGCGACCGAGGGAATGATCCTCACCAACCACGACCATCAAATCCGTGTCGGAGTCCTCACAGTGAGTGATAGCTGCTTCAGGAATCTTGCAGAAGACCGCAGTGGGATAAATCTAAAAGATCTTGTCCAAGATCCTTCTTTGTTGGGTGGGACTATATCGGCATACAAGATAGTACCAGATGAAATAGAAGAAATCAAGGAAACACTCATAGACTGGTGTGATGAAAAGGAACTTAATTTAATATTAACAACTGGAGGAACGGGGTTTGCACCACGAGATGTCACTCCAGAGGCCACAAAAGAAGTAATAGAGCGGGAAGCGCCAGGGATGGCCCTGGCAATGCTGATGGGATCGCTCAATGTCACACCTCTGGGCATGCTCTCTAGACCAGTGTGT…	MATEGMILTNHDHQIRVGVLTVSDSCFRNLAEDRSGINLKDLVQDPSLLGGTISAYKIVPDEIEEIKETLIDWCDEKELNLILTTGGTGFAPRDVTPEATKEVIEREAPGMALAMLMGSLNVTPLGMLSRPVCGIRGKTLIINLPGSKKGSQECFQFILPALPHAIDLLRDAIVKVKEVHDELEDLPSPPPPLSPPPTTSPHKQTEDKGVQCEEEEEEKKDSGVASTEDSSSSHITAAALAAKVTVL	lcl|GPHN_110:8-751_ORF2_GPHN_110:7:750	['GPHN_110_ORF2']
GPHN_111	ORF1	692	75.26	GPHN	E40	CTGCTTCAGGAATCT	CTGCTTCAGGAATCTTGCAGAAGACCGCAGTGGGATAAATCTAAAAGATCTTGTCCAAGATCCTTCTTTGAAACACTCATAGACTGGTGTGATGAAAAGGAACTTAATTTAATATTAACAACTGGAGGAACGGGGTTTGCACCACGAGATGTCACTCCAGAGGCCACAAAAGAAGTAATAGAGCGGGAAGCGCCAGGGATGGCCCTGGCAATGCTGATGGGATCGCTCAATGTCACACCTCTGGGCATGCTCTCTAGACCAGTGTGTGGAATAAGGGGGAAAACTCTGATAATTAACCTACCTGGTAGCAAGAAAGGATCTCAGGAATGCTTTCAGTTCATACTGCCAGCTCTACCTCATGCCATTGACCTTTTACGTGATGCCATTGTAAAAGTAAAG…	MLQESCRRPQWDKSKRSCPRSFFETLIDWCDEKELNLILTTGGTGFAPRDVTPEATKEVIEREAPGMALAMLMGSLNVTPLGMLSRPVCGIRGKTLIINLPGSKKGSQECFQFILPALPHAIDLLRDAIVKVKEVHDELEDLPSPPPPLSPPPTTSPHKQTEDKGVQCEEEEEEKKDSGVASTEDSSSSHITAAALAAKIPDSIISRGVQVLPRDTASLSTTPSESPRAQATSRLSTASCPTPKVQSRCSSKENILRASHSAVDITKVARRHRMSPFPLTSMDKAFITVLEMTPVLGTEIINYRDGMGRVLAQDVYAKDNLPPFPASVKDGYAVRAADGPGDRFIIGESQAGEQPTQTVMPGQVMRVTTGAPIPCGADAVVQVEDTELIRESDDGTEEL…	lcl|GPHN_111:82-2160_ORF1_GPHN_111:81:2159	['GPHN_111_ORF1']
GPHN_112	ORF1	258	28.44	GPHN	E40	ATGGCGACCGAGGGA	ATGGCGACCGAGGGAATGATCCTCACCAACCACGACCATCAAATCCGTGTCGGAGTCCTCACAGTGGTTGCCGTTATGTCAACAGGGAATGAGCTGCTAAATCCTGAAGATGATCTCTTACCAGGAAAGATTCGGGACAGCAATCGATCAACACTTCTAGCAACAATTCAGGAACATGGTTACCCAACAATCAACCTGGGAATTGTAGGAGACAACCCAGATGACTTACTCAATGCCTTGAATGAGGGTATCAGCCGTGCTGATGTCATCATCACGTCAGGAGGTGTGTCCATGGGGGAAAAGGACTATCTCAAGCAGGTGCTGGACATTGATCTTCATGCTCAGATCCATTTTGGCAGAGTTTTTATGAAGCCAGGCTTGCCAACAACATTTGCAACT…	MATEGMILTNHDHQIRVGVLTVVAVMSTGNELLNPEDDLLPGKIRDSNRSTLLATIQEHGYPTINLGIVGDNPDDLLNALNEGISRADVIITSGGVSMGEKDYLKQVLDIDLHAQIHFGRVFMKPGLPTTFATLDIDGVRKIIFALPGNPVSAVVTCNLFVVPALRKMQGILDPRPTIIKARLSCDVKLDPRPEYHRCILTWHHQEPLPWAQSTGNQMSSRLMSMRSANGLLMLPPKTEQYVELHKGEVVDVMVIGRL	lcl|GPHN_112:8-784_ORF1_GPHN_112:7:783	['GPHN_112_ORF1']
GPHN_113	ORF1	705	76.43	GPHN	E40	ATGGCGACCGAGGGA	ATGGCGACCGAGGGAATGATCCTCACCAACCACGACCATCAAATCCGTGTCGGAGTCCTCACAGTGAGTGATAGCTGCTTCAGGAATCTTGCAGAAGACCGCAGTGGGATAAATCTAAAAGATCTTGTCCAAGATCCTTCTTTGTTGGGTGGGACTATATCGGCATACAAGATAGTACCAGATGAAATAGAAGAAATCAAGGAAACACTCATAGACTGGTGTGATGAAAAGGAACTTAATTTAATATTAACAACTGGAGGAACGGGGTTTGCACCACGAGATGTCACTCCAGAGGCCACAAAAGAAGTAATAGAGCGGGAAGCGCCAGGGATGGCCCTGGCAATGCTGATGGGATCGCTCAATGTCACACCTCTGGGCATGCTCTCTAGACCAGTGTGT…	MATEGMILTNHDHQIRVGVLTVSDSCFRNLAEDRSGINLKDLVQDPSLLGGTISAYKIVPDEIEEIKETLIDWCDEKELNLILTTGGTGFAPRDVTPEATKEVIEREAPGMALAMLMGSLNVTPLGMLSRPVCGIRGKTLIINLPGSKKGSQECFQFILPALPHAIDLLRDAIVKVKEVHDELEDLPSPPPPLSPPPTTSPHKQTEDKGVQCEEEEEEKKDSGVASTEDSSSSHITAAALAAKIPDSIISRGVQVLPRDTASLSTTPSESPRAQATSRLSTASCPTPKVQSRCSSKENILRASHSAVDITKVARRHRMSPFPLTSMDKAFITVLEMTPVLGTEIINYRAADGPGDRFIIGESQAGEQPTQTVMPGQVMRVTTGAPIPCGADAVVQVEDT…	lcl|GPHN_113:8-2125_ORF1_GPHN_113:7:2124	['GPHN_113_ORF1']
GPHN_114	ORF1	151	16.99	GPHN	E40	CTGGACATTGATCTT	CTGGACATTGATCTTCATGCTCAGATCCATTTTGGCAGAGTTTTTATGAAGCCAGGCTTGCCAACAACATTTGCAACTTTGGATATTGATGGTGTAAGAAAAATTATTTTTGCACTACCAGGGAATCCTGTATCAGCTGTGGTCACCTGCAACCTCTTTGTTGTACCTGCACTGAGAAAGATGCAGGGTATCTTGGATCCTCGGCCAACCATCATCAAAGCCAGGTTATCGTGTGATGTAAAACTGGACCCTCGCCCAGAATACCACCGGTGTATACTGACTTGGCATCACCAAGAACCACTGCCCTGGGCCCAGAGTACAGGTAATCAGATGAGCAGCCGTCTGATGAGCATGCGCAGTGCCAATGGATTATTGATGCTACCTCCAAAGACAGAGCAG…	MDIDLHAQIHFGRVFMKPGLPTTFATLDIDGVRKIIFALPGNPVSAVVTCNLFVVPALRKMQGILDPRPTIIKARLSCDVKLDPRPEYHRCILTWHHQEPLPWAQSTGNQMSSRLMSMRSANGLLMLPPKTEQYVELHKGEVVDVMVIGRL	lcl|GPHN_114:1675-2130_ORF1_GPHN_114:1674:2129	['GPHN_114_ORF1']
	ORF2	571	61.6	GPHN	PTC	ATGGCGACCGAGGGA	ATGGCGACCGAGGGAATGATCCTCACCAACCACGACCATCAAATCCGTGTCGGAGTCCTCACAGTGAGTGATAGCTGCTTCAGGAATCTTGCAGAAGACCGCAGTGGGATAAATCTAAAAGATCTTGTCCAAGATCCTTCTTTGTTGGGTGGGACTATATCGGCATACAAGATAGTACCAGATGAAATAGAAGAAATCAAGGAAACACTCATAGACTGGTGTGATGAAAAGGAACTTAATTTAATATTAACAACTGGAGGAACGGGGTTTGCACCACGAGATGTCACTCCAGAGGCCACAAAAGAAGTAATAGAGCGGGAAGCGCCAGGGATGGCCCTGGCAATGCTGATGGGATCGCTCAATGTCACACCTCTGGGCATGCTCTCTAGACCAGTGTGT…	MATEGMILTNHDHQIRVGVLTVSDSCFRNLAEDRSGINLKDLVQDPSLLGGTISAYKIVPDEIEEIKETLIDWCDEKELNLILTTGGTGFAPRDVTPEATKEVIEREAPGMALAMLMGSLNVTPLGMLSRPVCGIRGKTLIINLPGSKKGSQECFQFILPALPHAIDLLRDAIVKVKEVHDELEDLPSPPPPLSPPPTTSPHKQTEDKGVQCEEEEEEKKDSGVASTEDSSSSHITAAALAAKIPDSIISRGVQVLPRDTASLSTTPSESPRAQATSRLSTASCPTPKVQSRCSSKENILRASHSAVDITKVARRHRMSPFPLTSMDKAFITVLEMTPVLGTEIINYRDGMGRVLAQDVYAKDNLPPFPASVKDGYAVRAADGPGDRFIIGESQAGEQP…	lcl|GPHN_114:8-1723_ORF2_GPHN_114:7:1722	['GPHN_114_ORF2']
GPHN_115	ORF1	402	43.45	GPHN	PTC	ATGGCGACCGAGGGA	ATGGCGACCGAGGGAATGATCCTCACCAACCACGACCATCAAATCCGTGTCGGAGTCCTCACAGTGAGTGATAGCTGCTTCAGGAATCTTGCAGAAGACCGCAGTGGGATAAATCTAAAAGATCTTGTCCAAGATCCTTCTTTGTTGGGTGGGACTATATCGGCATACAAGATAGTACCAGATGAAATAGAAGAAATCAAGGAAACACTCATAGACTGGTGTGATGAAAAGGAACTTAATTTAATATTAACAACTGGAGGAACGGGGTTTGCACCACGAGATGTCACTCCAGAGGCCACAAAAGAAGTAATAGAGCGGGAAGCGCCAGGGATGGCCCTGGCAATGCTGATGGGATCGCTCAATGTCACACCTCTGGGCATGCTCTCTAGACCAGTGTGT…	MATEGMILTNHDHQIRVGVLTVSDSCFRNLAEDRSGINLKDLVQDPSLLGGTISAYKIVPDEIEEIKETLIDWCDEKELNLILTTGGTGFAPRDVTPEATKEVIEREAPGMALAMLMGSLNVTPLGMLSRPVCGIRGKTLIINLPGSKKGSQECFQFILPALPHAIDLLRDAIVKVKEVHDELEDLPSPPPPLSPPPTTSPHKQTEDKGVQCEEEEEEKKDSGVASTEDSSSSHITAAALAAKIPDSIISRGVQVLPRDTASLSTTPSESPRAQATSRLSTASCPTPKVQSRCSSKENILRASHSAVDITKVARRHRMSPFPLTSMDKAFITVLEMTPVLGTEIINYRDGMGRVLAQDVYAKDNLPPFPASVKDGYAVRANSDSNARTSDAGYNRCSNP…	lcl|GPHN_115:8-1216_ORF1_GPHN_115:7:1215	['GPHN_115_ORF1']
	ORF2	344	37.6	GPHN	E40	ATGGCTATGCTGTTC	ATGGCTATGCTGTTCGAGCCAACTCAGACAGTAATGCCAGGACAAGTGATGCGGGTTACAACAGGTGCTCCAATCCCCTGCGGTGCTGATGCAGTAGTGCAAGTTGAAGATACTGAACTCATCAGGGAATCAGATGATGGTACTGAAGAACTTGAAGTACGAATTCTGGTGCAAGCTCGGCCAGGCCAAGATATCCGACCCATCGGCCATGACATTAAGAGAGGGGAGTGTGTTTTGGCCAAAGGAACCCATATGGGCCCTTCAGAGATTGGTCTCCTTGCAACTGTGGGTGTCACAGAAGTGGAAGTTAATAAGTTTCCAGTGGTTGCCGTTATGTCAACAGGGAATGAGCTGCTAAATCCTGAAGATGATCTCTTACCAGGAAAGATTCGGGACAGC…	MAMLFEPTQTVMPGQVMRVTTGAPIPCGADAVVQVEDTELIRESDDGTEELEVRILVQARPGQDIRPIGHDIKRGECVLAKGTHMGPSEIGLLATVGVTEVEVNKFPVVAVMSTGNELLNPEDDLLPGKIRDSNRSTLLATIQEHGYPTINLGIVGDNPDDLLNALNEGISRADVIITSGGVSMGEKDYLKQVLDIDLHAQIHFGRVFMKPGLPTTFATLDIDGVRKIIFALPGNPVSAVVTCNLFVVPALRKMQGILDPRPTIIKARLSCDVKLDPRPEYHRCILTWHHQEPLPWAQSTGNQMSSRLMSMRSANGLLMLPPKTEQYVELHKGEVVDVMVIGRL	lcl|GPHN_115:1128-2162_ORF2_GPHN_115:1127:2161	['GPHN_115_ORF2']
GPHN_116	ORF1	100	11.18	unknown	PTC	CTGCAGCAGCTCTTG	CTGCAGCAGCTCTTGCTGCAAAGAAGCATCCATTCTACACCAGTCCTGCTCTTTTCATGGCAAATCATGGGCAGCCCATCCCTGGTCTCATCAGTTATTCCCATCATGCAACAGGCAGTGCAGATAAACGGATTCCAGACTCCATCATTTCTCGTGGTGTTCAGGTGCTCCCACGAGACACAGCCTCCCTTAGCACTACTCCTTCAGAATCGCCCCGTGCTCAGGCTACATCTCGCCTCTCTACAGCTTCTTGTCCAACACCAAAAGTCCAGTCCAGGTGCAGCAGCAAGGAGAACATTCTAA	MQQLLLQRSIHSTPVLLFSWQIMGSPSLVSSVIPIMQQAVQINGFQTPSFLVVFRCSHETQPPLALLLQNRPVLRLHLASLQLLVQHQKSSPGAAARRTF	lcl|GPHN_116:577-879_ORF1_GPHN_116:576:878	['GPHN_105_ORF2', 'GPHN_116_ORF1', 'GPHN_119_ORF1', 'GPHN_143_ORF2', 'GPHN_144_ORF2', 'GPHN_164_ORF1', 'GPHN_171_ORF2', 'GPHN_185_ORF2', 'GPHN_190_ORF2', 'GPHN_241_ORF2', 'GPHN_254_ORF2', 'GPHN_38_ORF2', 'GPHN_4_ORF2', 'GPHN_51_ORF2', 'GPHN_57_ORF2', 'GPHN_77_ORF2', 'GPHN_95_ORF1']
	ORF2	662	71.63	GPHN	E40	ATGGCCCTGGCAATG	ATGGCCCTGGCAATGCTGATGGGATCGCTCAATGTCACACCTCTGGGCATGCTCTCTAGACCAGTGTGTGGAATAAGGGGGAAAACTCTGATAATTAACCTACCTGGTAGCAAGAAAGGATCTCAGGAATGCTTTCAGTTCATACTGCCAGCTCTACCTCATGCCATTGACCTTTTACGTGATGCCATTGTAAAAGTAAAGGAGGTGCATGATGAACTTGAAGATTTACCTTCCCCACCACCTCCTCTCTCTCCACCTCCTACAACTAGCCCACATAAACAGACAGAAGACAAAGGAGTTCAGTGTGAAGAAGAGGAAGAAGAAAAGAAAGACAGTGGTGTAGCTTCAACAGAAGATAGTTCCTCATCACATATAACTGCAGCAGCTCTTGCTGCAAAG…	MALAMLMGSLNVTPLGMLSRPVCGIRGKTLIINLPGSKKGSQECFQFILPALPHAIDLLRDAIVKVKEVHDELEDLPSPPPPLSPPPTTSPHKQTEDKGVQCEEEEEEKKDSGVASTEDSSSSHITAAALAAKKHPFYTSPALFMANHGQPIPGLISYSHHATGSADKRIPDSIISRGVQVLPRDTASLSTTPSESPRAQATSRLSTASCPTPKVQSRCSSKENILRASHSAVDITKVARRHRMSPFPLTSMDKAFITVLEMTPVLGTEIINYRDGMGRVLAQDVYAKDNLPPFPASVKDGYAVRAADGPGDRFIIGESQAGEQPTQTVMPGQVMRVTTGAPIPCGADAVVQVEDTELIRESDDGTEELEVRILVQARPGQDIRPIGHDIKRGECVLAK…	lcl|GPHN_116:201-2189_ORF2_GPHN_116:200:2188	['GPHN_116_ORF2', 'GPHN_95_ORF2']
GPHN_117	ORF1	723	78.03	GPHN	E40	ATGGCGACCGAGGGA	ATGGCGACCGAGGGAATGATCCTCACCAACCACGACCATCAAATCCGTGTCGGAGTCCTCACAGTGAGTGATAGCTGCTTCAGGAATCTTGCAGAAGACCGCAGTGGGATAAATCTAAAAGATCTTGTCCAAGATCCTTCTTTGTTGGGTGGGACTATATCGGCATACAAGATAGTACCAGATGAAATAGAAGAAATCAAGGAAACACTCATAGACTGGTGTGATGAAAAGGAACTTAATTTAATATTAACAACTGGAGGAACGGGGTTTGCACCACGAGATGTCACTCCAGAGAAATTCCCAACATTCCCATTTTGTGGGCTCCAGAAAGGGGCCACAAAAGAAGTAATAGAGCGGGAAGCGCCAGGGATGGCCCTGGCAATGCTGATGGGATCGCTC…	MATEGMILTNHDHQIRVGVLTVSDSCFRNLAEDRSGINLKDLVQDPSLLGGTISAYKIVPDEIEEIKETLIDWCDEKELNLILTTGGTGFAPRDVTPEKFPTFPFCGLQKGATKEVIEREAPGMALAMLMGSLNVTPLGMLSRPVCGIRGKTLIINLPGSKKGSQECFQFILPALPHAIDLLRDAIVKVKEVHDELEDLPSPPPPLSPPPTTSPHKQTEDKGVQCEEEEEEKKDSGVASTEDSSSSHITAAALAAKIPDSIISRGVQVLPRDTASLSTTPSESPRAQATSRLSTASCPTPKQIRRPDESKGVASRVGSLKYLLSLGDFVHKTFKARLPSCSSTYSVSEVQSRCSSKENILRASHSAVDITKVARRHRMSPFPLTSMDKAFITVLEMTPV…	lcl|GPHN_117:8-2179_ORF1_GPHN_117:7:2178	['GPHN_117_ORF1']
	ORF2	111	13.08	unknown	PTC	CTGCAGCAGCTCTTG	CTGCAGCAGCTCTTGCTGCAAAGATTCCAGACTCCATCATTTCTCGTGGTGTTCAGGTGCTCCCACGAGACACAGCCTCCCTTAGCACTACTCCTTCAGAATCGCCCCGTGCTCAGGCTACATCTCGCCTCTCTACAGCTTCTTGTCCAACACCAAAACAAATTAGACGGCCGGATGAAAGCAAAGGAGTTGCTAGTAGAGTTGGATCCCTCAAATATCTATTATCACTGGGAGATTTTGTACATAAAACATTTAAGGCTCGGCTTCCGTCGTGCTCATCTACCTATAGTGTATCTGAGGTCCAGTCCAGGTGCAGCAGCAAGGAGAACATTCTAA	MQQLLLQRFQTPSFLVVFRCSHETQPPLALLLQNRPVLRLHLASLQLLVQHQNKLDGRMKAKELLVELDPSNIYYHWEILYIKHLRLGFRRAHLPIVYLRSSPGAAARRTF	lcl|GPHN_117:753-1088_ORF2_GPHN_117:752:1087	['GPHN_117_ORF2', 'GPHN_138_ORF2', 'GPHN_169_ORF1', 'GPHN_23_ORF2', 'GPHN_274_ORF2', 'GPHN_277_ORF2', 'GPHN_81_ORF2']
GPHN_118	ORF1	613	66.21	GPHN	E40	ATGGCGACCGAGGGA	ATGGCGACCGAGGGAATGATCCTCACCAACCACGACCATCAAATCCGTGTCGGAGTCCTCACAGTGAGTGATAGCTGCTTCAGGAATCTTGCAGAAGACCGCAGTGGGATAAATCTAAAAGATCTTGTCCAAGATCCTTCTTTGTTGGGTGGGACTATATCGGCATACAAGATAGTACCAGATGAAATAGAAGAAATCAAGGAAACACTCATAGACTGGTGTGATGAAAAGGAACTTAATTTAATATTAACAACTGGAGGAACGGGGTTTGCACCACGAGATGTCACTCCAGAGGCCACAAAAGAAGTAATAGAGCGGGAAGCGCCAGGGATGGCCCTGGCAATGCTGATGGGATCGCTCAATGTCACACCTCTGGGCATGCTCTCTAGACCAGTGTGT…	MATEGMILTNHDHQIRVGVLTVSDSCFRNLAEDRSGINLKDLVQDPSLLGGTISAYKIVPDEIEEIKETLIDWCDEKELNLILTTGGTGFAPRDVTPEATKEVIEREAPGMALAMLMGSLNVTPLGMLSRPVCGIRGKTLIINLPGSKKGSQIPDSIISRGVQVLPRDTASLSTTPSESPRAQATSRLSTASCPTPKARLPSCSSTYSVSEVQSRCSSKENILRANGMGRVLAQDVYAKDNLPPFPASVKDGYAVRAADGPGDRFIIGESQAGEQPTQTVMPGQVMRVTTGAPIPCGADAVVQVEDTELIRESDDGTEELEVRILVQARPGQDIRPIGHDIKRGECVLAKGTHMGPSEIGLLATVGVTEVEVNKFPVVAVMSTGNELLNPEDDLLPGKI…	lcl|GPHN_118:8-1849_ORF1_GPHN_118:7:1848	['GPHN_118_ORF1']
GPHN_119	ORF1	100	11.18	unknown	PTC	CTGCAGCAGCTCTTG	CTGCAGCAGCTCTTGCTGCAAAGAAGCATCCATTCTACACCAGTCCTGCTCTTTTCATGGCAAATCATGGGCAGCCCATCCCTGGTCTCATCAGTTATTCCCATCATGCAACAGGCAGTGCAGATAAACGGATTCCAGACTCCATCATTTCTCGTGGTGTTCAGGTGCTCCCACGAGACACAGCCTCCCTTAGCACTACTCCTTCAGAATCGCCCCGTGCTCAGGCTACATCTCGCCTCTCTACAGCTTCTTGTCCAACACCAAAAGTCCAGTCCAGGTGCAGCAGCAAGGAGAACATTCTAA	MQQLLLQRSIHSTPVLLFSWQIMGSPSLVSSVIPIMQQAVQINGFQTPSFLVVFRCSHETQPPLALLLQNRPVLRLHLASLQLLVQHQKSSPGAAARRTF	lcl|GPHN_119:571-873_ORF1_GPHN_119:570:872	['GPHN_105_ORF2', 'GPHN_116_ORF1', 'GPHN_119_ORF1', 'GPHN_143_ORF2', 'GPHN_144_ORF2', 'GPHN_164_ORF1', 'GPHN_171_ORF2', 'GPHN_185_ORF2', 'GPHN_190_ORF2', 'GPHN_241_ORF2', 'GPHN_254_ORF2', 'GPHN_38_ORF2', 'GPHN_4_ORF2', 'GPHN_51_ORF2', 'GPHN_57_ORF2', 'GPHN_77_ORF2', 'GPHN_95_ORF1']
	ORF2	154	16.6	GPHN	PTC	ATGGCGACCGAGGGA	ATGGCGACCGAGGGAATGATCCTCACCAACCACGACCATCAAATCCGTGTCGGAGTCCTCACAGTGAGTGATAGCTGCTTCAGGAATCTTGCAGAAGACCGCAGTGGGATAAATCTAAAAGATCTTGTCCAAGATCCTTCTTTGTTGGGTGGGACTATATCGGCATACAAGATAGTACCAGATGAAATAGAAGAAATCAAGGAAACACTCATAGACTGGTGTGATGAAAAGGAACTTAATTTAATATTAACAACTGGAGGAACGGGGTTTGCACCACGAGATGTCACTCCAGAGGCCACAAAAGAAGTAATAGAGCGGGAAGCGCCAGGGATGGCCCTGGCAATGCTGATGGGATCGCTCAATGTCACACCTCTGGGCATGCTCTCTAGACCAGTGTGT…	MATEGMILTNHDHQIRVGVLTVSDSCFRNLAEDRSGINLKDLVQDPSLLGGTISAYKIVPDEIEEIKETLIDWCDEKELNLILTTGGTGFAPRDVTPEATKEVIEREAPGMALAMLMGSLNVTPLGMLSRPVCGIRGKTLIINLPGSKKGSQPT	lcl|GPHN_119:8-472_ORF2_GPHN_119:7:471	['GPHN_104_ORF1', 'GPHN_119_ORF2', 'GPHN_169_ORF2', 'GPHN_209_ORF1', 'GPHN_55_ORF1', 'GPHN_80_ORF1']
	ORF3	580	62.92	GPHN	E40	CTGGTAGCAAGAAAG	CTGGTAGCAAGAAAGGATCTCAGCCCACATAAACAGACAGAAGACAAAGGAGTTCAGTGTGAAGAAGAGGAAGAAGAAAAGAAAGACAGTGGTGTAGCTTCAACAGAAGATAGTTCCTCATCACATATAACTGCAGCAGCTCTTGCTGCAAAGAAGCATCCATTCTACACCAGTCCTGCTCTTTTCATGGCAAATCATGGGCAGCCCATCCCTGGTCTCATCAGTTATTCCCATCATGCAACAGGCAGTGCAGATAAACGGATTCCAGACTCCATCATTTCTCGTGGTGTTCAGGTGCTCCCACGAGACACAGCCTCCCTTAGCACTACTCCTTCAGAATCGCCCCGTGCTCAGGCTACATCTCGCCTCTCTACAGCTTCTTGTCCAACACCAAAAGTC…	MVARKDLSPHKQTEDKGVQCEEEEEEKKDSGVASTEDSSSSHITAAALAAKKHPFYTSPALFMANHGQPIPGLISYSHHATGSADKRIPDSIISRGVQVLPRDTASLSTTPSESPRAQATSRLSTASCPTPKVQSRCSSKENILRASHSAVDITKVARRHRMSPFPLTSMDKAFITVLEMTPVLGTEIINYRDGMGRVLAQDVYAKDNLPPFPASVKDGYAVRAADGPGDRFIIGESQAGEQPTQTVMPGQVMRVTTGAPIPCGADAVVQVEDTELIRESDDGTEELEVRILVQARPGQDIRPIGHDIKRGECVLAKGTHMGPSEIGLLATVGVTEVEVNKFPVVAVMSTGNELLNPEDDLLPGKIRDSNRSTLLATIQEHGYPTINLGIVGDNPDDLL…	lcl|GPHN_119:441-2183_ORF3_GPHN_119:440:2182	['GPHN_119_ORF3']
GPHN_120	ORF1	705	76.59	GPHN	E40	ATGGCGACCGAGGGA	ATGGCGACCGAGGGAATGATCCTCACCAACCACGACCATCAAATCCGTGTCGGAGTCCTCACAGTGAGTGATAGCTGCTTCAGGAATCTTGCAGAAGACCGCAGTGGGATAAATCTAAAAGATCTTGTCCAAGATCCTTCTTTGTTGGGTGGGACTATATCGGCATACAAGATAGTACCAGATGAAATAGAAGAAATCAAGGAAACACTCATAGACTGGTGTGATGAAAAGGAACTTAATTTAATATTAACAACTGGAGGAACGGGGTTTGCACCACGAGATGTCACTCCAGAGAAATTCCCAACATTCCCATTTTGTGGGCTCCAGAAAGGGGCCACAAAAGAAGTAATAGAGCGGGAAGCGCCAGGGATGGCCCTGGCAATGCTGATGGGATCGCTC…	MATEGMILTNHDHQIRVGVLTVSDSCFRNLAEDRSGINLKDLVQDPSLLGGTISAYKIVPDEIEEIKETLIDWCDEKELNLILTTGGTGFAPRDVTPEKFPTFPFCGLQKGATKEVIEREAPGMALAMLMGSLNVTPLGMLSRPVCGIRGKTLIINLPGSKKGSQIPDSIISRGVQVLPRDTASLSTTPSESPRAQATSRLSTASCPTPKQIRRPDESKGVASRVGSLKYLLSLGDFVHKTFKARLPSCSSTYSVSEVQSRCSSKENILRASHSAVDITKVARRHRMSPFPLTSMDKAFITVLEMTPVLGTEIINYRDGMGRVLAQDVYAKDNLPPFPASVKDGYAVRAADGPGDRFIIGESQAGEQPTQTVMPGQVMRVTTGAPIPCGADAVVQVEDT…	lcl|GPHN_120:8-2125_ORF1_GPHN_120:7:2124	['GPHN_120_ORF1']
	ORF2	111	13.04	unknown	PTC	CTGGTAGCAAGAAAG	CTGGTAGCAAGAAAGGATCTCAGATTCCAGACTCCATCATTTCTCGTGGTGTTCAGGTGCTCCCACGAGACACAGCCTCCCTTAGCACTACTCCTTCAGAATCGCCCCGTGCTCAGGCTACATCTCGCCTCTCTACAGCTTCTTGTCCAACACCAAAACAAATTAGACGGCCGGATGAAAGCAAAGGAGTTGCTAGTAGAGTTGGATCCCTCAAATATCTATTATCACTGGGAGATTTTGTACATAAAACATTTAAGGCTCGGCTTCCGTCGTGCTCATCTACCTATAGTGTATCTGAGGTCCAGTCCAGGTGCAGCAGCAAGGAGAACATTCTAA	MVARKDLRFQTPSFLVVFRCSHETQPPLALLLQNRPVLRLHLASLQLLVQHQNKLDGRMKAKELLVELDPSNIYYHWEILYIKHLRLGFRRAHLPIVYLRSSPGAAARRTF	lcl|GPHN_120:480-815_ORF2_GPHN_120:479:814	['GPHN_120_ORF2', 'GPHN_74_ORF2']
GPHN_121	ORF1	786	85.15	GPHN	E40	ATGGCGACCGAGGGA	ATGGCGACCGAGGGAATGATCCTCACCAACCACGACCATCAAATCCGTGTCGGAGTCCTCACAGTGAGTGATAGCTGCTTCAGGAATCTTGCAGAAGACCGCAGTGGGATAAATCTAAAAGATCTTGTCCAAGATCCTTCTTTGTTGGGTGGGACTATATCGGCATACAAGATAGTACCAGATGAAATAGAAGAAATCAAGGAAACACTCATAGACTGGTGTGATGAAAAGGAACTTAATTTAATATTAACAACTGGAGGAACGGGGTTTGCACCACGAGATGTCACTCCAGAGGCCACAAAAGAAGTAATAGAGCGGGAAGCGCCAGGGATGGCCCTGGCAATGCTGATGGGATCGCTCAATGTCACACCTCTGGGCATGCTCTCTAGACCAGTGTGT…	MATEGMILTNHDHQIRVGVLTVSDSCFRNLAEDRSGINLKDLVQDPSLLGGTISAYKIVPDEIEEIKETLIDWCDEKELNLILTTGGTGFAPRDVTPEATKEVIEREAPGMALAMLMGSLNVTPLGMLSRPVCGIRGKTLIINLPGSKKGSQECFQFILPALPHAIDLLRDAIVKVKEVHDELEDLPSPPPPLSPPPTTSPHKQTEDKGVQCEEEEEEKKDSGVASTEDSSSSHITAAALAAKKHPFYTSPALFMANHGQPIPGLISYSHHATGSADKRIPDSIISRGVQVLPRDTASLSTTPSESPRAQATSRLSTASCPTPKARLPSCSSTYSVSEVQSRCSSKENILRASHSAVDITKVARRHRMSPFPLTSMDKAFITVLEMTPVLGTEIINYRD…	lcl|GPHN_121:8-2368_ORF1_GPHN_121:7:2367	['GPHN_121_ORF1']
	ORF2	114	12.88	unknown	PTC	CTGCAGCAGCTCTTG	CTGCAGCAGCTCTTGCTGCAAAGAAGCATCCATTCTACACCAGTCCTGCTCTTTTCATGGCAAATCATGGGCAGCCCATCCCTGGTCTCATCAGTTATTCCCATCATGCAACAGGCAGTGCAGATAAACGGATTCCAGACTCCATCATTTCTCGTGGTGTTCAGGTGCTCCCACGAGACACAGCCTCCCTTAGCACTACTCCTTCAGAATCGCCCCGTGCTCAGGCTACATCTCGCCTCTCTACAGCTTCTTGTCCAACACCAAAAGCTCGGCTTCCGTCGTGCTCATCTACCTATAGTGTATCTGAGGTCCAGTCCAGGTGCAGCAGCAAGGAGAACATTCTAA	MQQLLLQRSIHSTPVLLFSWQIMGSPSLVSSVIPIMQQAVQINGFQTPSFLVVFRCSHETQPPLALLLQNRPVLRLHLASLQLLVQHQKLGFRRAHLPIVYLRSSPGAAARRTF	lcl|GPHN_121:714-1058_ORF2_GPHN_121:713:1057	['GPHN_121_ORF2']
GPHN_122	ORF1	551	59.91	GPHN	E40	ATGGCGACCGAGGGA	ATGGCGACCGAGGGAATGATCCTCACCAACCACGACCATCAAATCCGTGTCGGAGTCCTCACAGTGAGTGATAGCTGCTTCAGGAATCTTGCAGAAGACCGCAGTGGGATAAATCTAAAAGATCTTGTCCAAGATCCTTCTTTGTTGGGTGGGACTATATCGGCATACAAGATAGTACCAGATGAAATAGAAGAAATCAAGGAAACACTCATAGACTGGTGTGATGAAAAGGAACTTAATTTAATATTAACAACTGGAGGAACGGGGTTTGCACCACGAGATGTCACTCCAGAGGCCACAAAAGAAGTAATAGAGCGGGAAGCGCCAGGGATGGCCCTGGCAATGCTGATGGGATCGCTCAATGTCACACCTCTGGGCATGCTCTCTAGACCAGTGTGT…	MATEGMILTNHDHQIRVGVLTVSDSCFRNLAEDRSGINLKDLVQDPSLLGGTISAYKIVPDEIEEIKETLIDWCDEKELNLILTTGGTGFAPRDVTPEATKEVIEREAPGMALAMLMGSLNVTPLGMLSRPVCGIRGKTLIINLPGSKKGSQECFQFILPALPHAIDLLRDAIVKVKEVHDELEDLPSPPPPLSPPPTTSPHKQTEDKGVQCEEEEEEKKDSGVASTEDSSSSHITAAALAAKKHPFYTSPALFMANHGQPIPGLISYSHHATGSADKRIPDSIISRGVQVLPRDTASLSTTPSESPRAQATSRLSTASCPTPKLLNPEDDLLPGKIRDSNRSTLLATIQEHGYPTINLGIVGDNPDDLLNALNEGISRADVIITSGGVSMGEKDYLKQ…	lcl|GPHN_122:8-1663_ORF1_GPHN_122:7:1662	['GPHN_122_ORF1']
GPHN_123	ORF1	713	77.75	GPHN	E40	ATGGCGACCGAGGGA	ATGGCGACCGAGGGAATGATCCTCACCAACCACGACCATCAAATCCGTGTCGGAGTCCTCACAGTGAGTGATAGCTGCTTCAGGAATCTTGCAGAAGACCGCAGTGGGATAAATCTAAAAGATCTTGTCCAAGATCCTTCTTTGTTGGGTGGGACTATATCGGCATACAAGATAGTACCAGATGAAATAGAAGAAATCAAGGAAACACTCATAGACTGGTGTGATGAAAAGGAACTTAATTTAATATTAACAACTGGAGGAACGGGGTTTGCACCACGAGATGTCACTCCAGAGGCCACAAAAGAAGTAATAGAGCGGGAAGCGCCAGGGATGGCCCTGGCAATGCTGATGGGATCGCTCAATGTCACACCTCTGGGCATGCTCTCTAGACCAGTGTGT…	MATEGMILTNHDHQIRVGVLTVSDSCFRNLAEDRSGINLKDLVQDPSLLGGTISAYKIVPDEIEEIKETLIDWCDEKELNLILTTGGTGFAPRDVTPEATKEVIEREAPGMALAMLMGSLNVTPLGMLSRPVCGIRGKTLIINLPGSKKGSQIPDSIISRGVQVLPRDTASLSTTPSESPRAQATSRLSTASCPTPKQIRRPDESKGVASRVGSLKYLLSLGDFVHKTFKARLPSCSSTYSVSELHSRLEGLKDELWRNRGYDLRVQSRCSSKENILRASHSAVDITKVARRHRMSPFPLTSMDKAFITVLEMTPVLGTEIINYRDGMGRVLAQDVYAKDNLPPFPASVKDGYAVRAADGPGDRFIIGESQAGEQPTQTVMPGQVMRVTTGAPIPCGAD…	lcl|GPHN_123:8-2149_ORF1_GPHN_123:7:2148	['GPHN_123_ORF1']
	ORF2	119	13.86	unknown	PTC	CTGGTAGCAAGAAAG	CTGGTAGCAAGAAAGGATCTCAGATTCCAGACTCCATCATTTCTCGTGGTGTTCAGGTGCTCCCACGAGACACAGCCTCCCTTAGCACTACTCCTTCAGAATCGCCCCGTGCTCAGGCTACATCTCGCCTCTCTACAGCTTCTTGTCCAACACCAAAACAAATTAGACGGCCGGATGAAAGCAAAGGAGTTGCTAGTAGAGTTGGATCCCTCAAATATCTATTATCACTGGGAGATTTTGTACATAAAACATTTAAGGCTCGGCTTCCGTCGTGCTCATCTACCTATAGTGTATCTGAGCTCCACTCTAGATTGGAAGGGCTTAAAGATGAACTCTGGAGGAATAGAGGCTACGACTTAA	MVARKDLRFQTPSFLVVFRCSHETQPPLALLLQNRPVLRLHLASLQLLVQHQNKLDGRMKAKELLVELDPSNIYYHWEILYIKHLRLGFRRAHLPIVYLSSTLDWKGLKMNSGGIEATT	lcl|GPHN_123:441-800_ORF2_GPHN_123:440:799	['GPHN_123_ORF2', 'GPHN_130_ORF2', 'GPHN_200_ORF2', 'GPHN_249_ORF2', 'GPHN_252_ORF2']
GPHN_124	ORF1	550	59.07	GPHN	PTC	ATGGCGACCGAGGGA	ATGGCGACCGAGGGAATGATCCTCACCAACCACGACCATCAAATCCGTGTCGGAGTCCTCACAGTGAGTGATAGCTGCTTCAGGAATCTTGCAGAAGACCGCAGTGGGATAAATCTAAAAGATCTTGTCCAAGATCCTTCTTTGTTGGGTGGGACTATATCGGCATACAAGATAGTACCAGATGAAATAGAAGAAATCAAGGAAACACTCATAGACTGGTGTGATGAAAAGGAACTTAATTTAATATTAACAACTGGAGGAACGGGGTTTGCACCACGAGATGTCACTCCAGAGGCCACAAAAGAAGTAATAGAGCGGGAAGCGCCAGGGATGGCCCTGGCAATGCTGATGGGATCGCTCAATGTCACACCTCTGGGCATGCTCTCTAGACCAGTGTGT…	MATEGMILTNHDHQIRVGVLTVSDSCFRNLAEDRSGINLKDLVQDPSLLGGTISAYKIVPDEIEEIKETLIDWCDEKELNLILTTGGTGFAPRDVTPEATKEVIEREAPGMALAMLMGSLNVTPLGMLSRPVCGIRGKTLIINLPGSKKGSQIPDSIISRGVQVLPRDTASLSTTPSESPRAQATSRLSTASCPTPKVQSRCSSKENILRASHSAVDITKVARRHRMSPFPLTSMDKAFITVLEMTPVLGTEIINYRDGMGRVLAQDVYAKDNLPPFPASVKDGYAVRAADGPGDRFIIGESQAGEQPTQTVMPGQVMRVTTGAPIPCGADAVVQVEDTELIRESDDGTEELEVRILVQARPGQDIRPIGHDIKRGECVLAKGTHMGPSEIGLLATVGV…	lcl|GPHN_124:8-1660_ORF1_GPHN_124:7:1659	['GPHN_124_ORF1']
GPHN_125	ORF1	578	62.62	GPHN	E40	CTGCCAGCTCTACCT	CTGCCAGCTCTACCTCATGCCATTGACCTTTTACGTGATGCCATTGTAAAAGTAAAGGAGGTGCATGATGAACTTGAAGATTTACCTTCCCCACCACCTCCTCTCTCTCCACCTCCTACAACTAGCCCACATAAACAGACAGAAGACAAAGGAGTTCAGTGTGAAGAAGAGGAAGAAGAAAAGAAAGACAGTGGTGTAGCTTCAACAGAAGATAGTTCCTCATCACATATAACTGCAGCAGCTCTTGCTGCAAAGATTCCAGACTCCATCATTTCTCGTGGTGTTCAGGTGCTCCCACGAGACACAGCCTCCCTTAGCACTACTCCTTCAGAATCGCCCCGTGCTCAGGCTACATCTCGCCTCTCTACAGCTTCTTGTCCAACACCAAAAGTCCAGTCC…	MPALPHAIDLLRDAIVKVKEVHDELEDLPSPPPPLSPPPTTSPHKQTEDKGVQCEEEEEEKKDSGVASTEDSSSSHITAAALAAKIPDSIISRGVQVLPRDTASLSTTPSESPRAQATSRLSTASCPTPKVQSRCSSKENILRASHSAVDITKVARRHRMSPFPLTSMDKAFITVLEMTPVLGTEIINYRDGMGRVLAQDVYAKDNLPPFPASVKDGYAVRAADGPGDRFIIGESQAGEQPTQTVMPGQVMRVTTGAPIPCGADAVVQVEDTELIRESDDGTEELEVRILVQARPGQDIRPIGHDIKRGECVLAKGTHMGPSEIGLLATVGVTEVEVNKFPVVAVMSTGNELLNPEDDLLPGKIRDSNRSTLLATIQEHGYPTINLGIVGDNPDDLLNA…	lcl|GPHN_125:415-2151_ORF1_GPHN_125:414:2150	['GPHN_125_ORF1']
	ORF2	151	16.64	GPHN	PTC	ATGGCGACCGAGGGA	ATGGCGACCGAGGGAATGATCCTCACCAACCACGACCATCAAATCCGTGTCGGAGTCCTCACAGTGAGTGATAGCTGCTTCAGGAATCTTGCAGAAGACCGCAGTGGGATAAATCTAAAAGATCTTGTCCAAGATCCTTCTTTGTTGGGTGGGACTATATCGGCATACAAGATAGTACCAGATGAAATAGAAGAAATCAAGGAAACACTCATAGACTGGTGTGATGAAAAGGAACTTAATTTAATATTAACAACTGGAGGAACGGGGTTTGCACCACGAGATGTCACTCCAGAGGCCACAAAAGAAGTAATAGAGCGGGAAGCGCCAGGGATGGCCCTGGCAATGCTGATGGGATCGCTCAATGTCACACCTCTGGGCATGCTCTCTAGGAATGCTTTC…	MATEGMILTNHDHQIRVGVLTVSDSCFRNLAEDRSGINLKDLVQDPSLLGGTISAYKIVPDEIEEIKETLIDWCDEKELNLILTTGGTGFAPRDVTPEATKEVIEREAPGMALAMLMGSLNVTPLGMLSRNAFSSYCQLYLMPLTFYVMPL	lcl|GPHN_125:8-463_ORF2_GPHN_125:7:462	['GPHN_125_ORF2']
GPHN_126	ORF1	701	75.94	GPHN	E40	TTGGGTGGGACTATA	TTGGGTGGGACTATATCGGCATACAAGATAGTACCAGATGAAATAGAAGAAATCAAGGAAACACTCATAGACTGGTGTGATGAAAAGGAACTTAATTTAATATTAACAACTGGAGGAACGGGGTTTGCACCACGAGATGTCACTCCAGAGAAATTCCCAACATTCCCATTTTGTGGGCTCCAGAAAGGGGCCACAAAAGAAGTAATAGAGCGGGAAGCGCCAGGGATGGCCCTGGCAATGCTGATGGGATCGCTCAATGTCACACCTCTGGGCATGCTCTCTAGACCAGTGTGTGGAATAAGGGGGAAAACTCTGATAATTAACCTACCTGGTAGCAAGAAAGGATCTCAGGAATGCTTTCAGTTCATACTGCCAGCTCTACCTCATGCCATTGACCTT…	MGGTISAYKIVPDEIEEIKETLIDWCDEKELNLILTTGGTGFAPRDVTPEKFPTFPFCGLQKGATKEVIEREAPGMALAMLMGSLNVTPLGMLSRPVCGIRGKTLIINLPGSKKGSQECFQFILPALPHAIDLLRDAIVKVKEVHDELEDLPSPPPPLSPPPTTSPHKQTEDKGVQCEEEEEEKKDSGVASTEDSSSSHITAAALAAKIPDSIISRGVQVLPRDTASLSTTPSESPRAQATSRLSTASCPTPKVQSRCSSKENILRASHSAVDITKVARRHRMSPFPLTSMDKAFITVLEMTPVLGTEIINYRDGMGRVLAQDVYAKDNLPPFPASVKDGYAVRAADGPGDRFIIGESQAGEQPTQTVMPGQVMRVTTGAPIPCGADAVVQVEDTELIR…	lcl|GPHN_126:73-2178_ORF1_GPHN_126:72:2177	['GPHN_126_ORF1']
GPHN_127	ORF1	316	34.75	GPHN	E40	ATGGCGACCGAGGGA	ATGGCGACCGAGGGAATGATCCTCACCAACCACGACCATCAAATCCGTGTCGGAGTCCTCACAGTGAGTGATAGCTGCTTCAGGAATCTTGCAGAAGACCGCAGTGGGATAAATCTAAAAGATCTTGTCCAAGATCCTTCTTTGTTGGGTGGGACTATATCGGCATACAAGATAGTACCAGATGAAATAGAAGAAATCAAGGAAACACTCATAGACTGGTGTGATGAAAAGGAACTTAATTTAATATTAACAACTGGAGGAACGGGGTTTGCACCACGAGATGTCACTCCAGAGGCCACAAAAGAAGTAATAGAGCGGGAAGCGCCAGGGATGGCCCTGGCAATGCTGATGGGATCGCTCAATGTCACACCTCTGGGCATGCTCTCTAGCCCAGATGAC…	MATEGMILTNHDHQIRVGVLTVSDSCFRNLAEDRSGINLKDLVQDPSLLGGTISAYKIVPDEIEEIKETLIDWCDEKELNLILTTGGTGFAPRDVTPEATKEVIEREAPGMALAMLMGSLNVTPLGMLSSPDDLLNALNEGISRADVIITSGGVSMGEKDYLKQVLDIDLHAQIHFGRVFMKPGLPTTFATLDIDGVRKIIFALPGNPVSAVVTCNLFVVPALRKMQGILDPRPTIIKARLSCDVKLDPRPEYHRCILTWHHQEPLPWAQSTGNQMSSRLMSMRSANGLLMLPPKTEQYVELHKGEVVDVMVIGRL	lcl|GPHN_127:8-958_ORF1_GPHN_127:7:957	['GPHN_127_ORF1']
GPHN_128	ORF1	405	44.23	GPHN	E40	ATGGCGACCGAGGGA	ATGGCGACCGAGGGAATGATCCTCACCAACCACGACCATCAAATCCGTGTCGGAGTCCTCACAGTGAGTGATAGCTGCTTCAGGAATCTTGCAGAAGACCGCAGTGGGATAAATCTAAAAGATCTTGTCCAAGATCCTTCTTTGTTGGGTGGGACTATATCGGCATACAAGATAGTACCAGATGAAATAGAAGAAATCAAGCCAACTCAGACAGTAATGCCAGGACAAGTGATGCGGGTTACAACAGGTGCTCCAATCCCCTGCGGTGCTGATGCAGTAGTGCAAGTTGAAGATACTGAACTCATCAGGGAATCAGATGATGGTACTGAAGAACTTGAAGTACGAATTCTGGTGCAAGCTCGGCCAGGCCAAGATATCCGACCCATCGGCCATGACATT…	MATEGMILTNHDHQIRVGVLTVSDSCFRNLAEDRSGINLKDLVQDPSLLGGTISAYKIVPDEIEEIKPTQTVMPGQVMRVTTGAPIPCGADAVVQVEDTELIRESDDGTEELEVRILVQARPGQDIRPIGHDIKRGECVLAKGTHMGPSEIGLLATVGVTEVEVNKFPVVAVMSTGNELLNPEDDLLPGKIRDSNRSTLLATIQEHGYPTINLGIVGDNPDDLLNALNEGISRADVIITSGGVSMGEKDYLKQVLDIDLHAQIHFGRVFMKPGLPTTFATLDIDGVRKIIFALPGNPVSAVVTCNLFVVPALRKMQGILDPRPTIIKARLSCDVKLDPRPEYHRCILTWHHQEPLPWAQSTGNQMSSRLMSMRSANGLLMLPPKTEQYVELHKGEVVDV…	lcl|GPHN_128:8-1225_ORF1_GPHN_128:7:1224	['GPHN_128_ORF1']
GPHN_129	ORF1	681	73.8	GPHN	E40	ATGGCGACCGAGGGA	ATGGCGACCGAGGGAATGATCCTCACCAACCACGACCATCAAATCCGTGTCGGAGTCCTCACAGTGAGTGATAGCTGCTTCAGGAATCTTGCAGAAGACCGCAGTGGGATAAATCTAAAAGATCTTGTCCAAGATCCTTCTTTGTTGGGTGGGACTATATCGGCATACAAGATAGTACCAGATGAAATAGAAGAAATCAAGGAAACACTCATAGACTGGTGTGATGAAAAGGAACTTAATTTAATATTAACAACTGGAGGAACGGGGTTTGCACCACGAGATGTCACTCCAGAGGCCACAAAAGAAGTAATAGAGCGGGAAGCGCCAGGGATGGCCCTGGCAATGCTGATGGGATCGCTCAATGTCACACCTCTGGGCATGCTCTCTAGACCAGTGTGT…	MATEGMILTNHDHQIRVGVLTVSDSCFRNLAEDRSGINLKDLVQDPSLLGGTISAYKIVPDEIEEIKETLIDWCDEKELNLILTTGGTGFAPRDVTPEATKEVIEREAPGMALAMLMGSLNVTPLGMLSRPVCGIRGKTLIINLPGSKKGSQECFQFILPALPHAIDLLRDAIVKVKEVHDELEDLPSPPPPLSPPPTTSPHKQTEDKGVQCEEEEEEKKDSGVASTEDSSSSHITAAALAAKKHPFYTSPALFMANHGQPIPGLISYSHHATGSADKRVQSRCSSKENILRANGMGRVLAQDVYAKDNLPPFPASVKDGYAVRAADGPGDRFIIGESQAGEQPTQTVMPGQVMRVTTGAPIPCGADAVVQVEDTELIRESDDGTEELEVRILVQARPG…	lcl|GPHN_129:8-2053_ORF1_GPHN_129:7:2052	['GPHN_129_ORF1']
GPHN_130	ORF1	618	66.87	GPHN	PTC	ATGGCGACCGAGGGA	ATGGCGACCGAGGGAATGATCCTCACCAACCACGACCATCAAATCCGTGTCGGAGTCCTCACAGTGAGTGATAGCTGCTTCAGGAATCTTGCAGAAGACCGCAGTGGGATAAATCTAAAAGATCTTGTCCAAGATCCTTCTTTGTTGGGTGGGACTATATCGGCATACAAGATAGTACCAGATGAAATAGAAGAAATCAAGGAAACACTCATAGACTGGTGTGATGAAAAGGAACTTAATTTAATATTAACAACTGGAGGAACGGGGTTTGCACCACGAGATGTCACTCCAGAGGCCACAAAAGAAGTAATAGAGCGGGAAGCGCCAGGGATGGCCCTGGCAATGCTGATGGGATCGCTCAATGTCACACCTCTGGGCATGCTCTCTAGACCAGTGTGT…	MATEGMILTNHDHQIRVGVLTVSDSCFRNLAEDRSGINLKDLVQDPSLLGGTISAYKIVPDEIEEIKETLIDWCDEKELNLILTTGGTGFAPRDVTPEATKEVIEREAPGMALAMLMGSLNVTPLGMLSRPVCGIRGKTLIINLPGSKKGSQIPDSIISRGVQVLPRDTASLSTTPSESPRAQATSRLSTASCPTPKQIRRPDESKGVASRVGSLKYLLSLGDFVHKTFKARLPSCSSTYSVSELHSRLEGLKDELWRNRGYDLRVQSRCSSKENILRASHSAVDITKVARRHRMSPFPLTSMDKAFITVLEMTPVLGTEIINYRDGMGRVLAQDVYAKDNLPPFPASVKDGYAVRAADGPGDRFIIGESQAGEQPTQTVMPGQVMRVTTGAPIPCGAD…	lcl|GPHN_130:8-1864_ORF1_GPHN_130:7:1863	['GPHN_130_ORF1']
	ORF2	119	13.86	unknown	PTC	CTGGTAGCAAGAAAG	CTGGTAGCAAGAAAGGATCTCAGATTCCAGACTCCATCATTTCTCGTGGTGTTCAGGTGCTCCCACGAGACACAGCCTCCCTTAGCACTACTCCTTCAGAATCGCCCCGTGCTCAGGCTACATCTCGCCTCTCTACAGCTTCTTGTCCAACACCAAAACAAATTAGACGGCCGGATGAAAGCAAAGGAGTTGCTAGTAGAGTTGGATCCCTCAAATATCTATTATCACTGGGAGATTTTGTACATAAAACATTTAAGGCTCGGCTTCCGTCGTGCTCATCTACCTATAGTGTATCTGAGCTCCACTCTAGATTGGAAGGGCTTAAAGATGAACTCTGGAGGAATAGAGGCTACGACTTAA	MVARKDLRFQTPSFLVVFRCSHETQPPLALLLQNRPVLRLHLASLQLLVQHQNKLDGRMKAKELLVELDPSNIYYHWEILYIKHLRLGFRRAHLPIVYLSSTLDWKGLKMNSGGIEATT	lcl|GPHN_130:441-800_ORF2_GPHN_130:440:799	['GPHN_123_ORF2', 'GPHN_130_ORF2', 'GPHN_200_ORF2', 'GPHN_249_ORF2', 'GPHN_252_ORF2']
GPHN_131	ORF1	612	66.94	GPHN	E40	ATGGCGACCGAGGGA	ATGGCGACCGAGGGAATGATCCTCACCAACCACGACCATCAAATCCGTGTCGGAGTCCTCACAGTGAGTGATAGCTGCTTCAGGAATCTTGCAGAAGACCGCAGTGGGATAAATCTAAAAGATCTTGTCCAAGATCCTTCTTTGTTGGGTGGGACTATATCGGCATACAAGATAGTACCAGATGAAATAGAAGAAATCAAGGAAACACTCATAGACTGGTGTGATGAAAAGGAACTTAATTTAATATTAACAACTGGAGGAACGGGGTTTGCACCACGAGATGTCACTCCAGAGATTCCAGACTCCATCATTTCTCGTGGTGTTCAGGTGCTCCCACGAGACACAGCCTCCCTTAGCACTACTCCTTCAGAATCGCCCCGTGCTCAGGCTACATCTCGC…	MATEGMILTNHDHQIRVGVLTVSDSCFRNLAEDRSGINLKDLVQDPSLLGGTISAYKIVPDEIEEIKETLIDWCDEKELNLILTTGGTGFAPRDVTPEIPDSIISRGVQVLPRDTASLSTTPSESPRAQATSRLSTASCPTPKLHSRLEGLKDELWRNRGYDLRVQSRCSSKENILRASHSAVDITKVARRHRMSPFPLTSMDKAFITVLEMTPVLGTEIINYRDGMGRVLAQDVYAKDNLPPFPASVKDGYAVRAADGPGDRFIIGESQAGEQPTQTVMPGQVMRVTTGAPIPCGADAVVQVEDTELIRESDDGTEELEVRILVQARPGQDIRPIGHDIKRGECVLAKGTHMGPSEIGLLATVGVTEVEVNKFPVVAVMSTGNELLNPEDDLLPGKIR…	lcl|GPHN_131:8-1846_ORF1_GPHN_131:7:1845	['GPHN_131_ORF1']
GPHN_132	ORF1	627	67.99	GPHN	E40	ATGGCGACCGAGGGA	ATGGCGACCGAGGGAATGATCCTCACCAACCACGACCATCAAATCCGTGTCGGAGTCCTCACAGTGAGTGATAGCTGCTTCAGGAATCTTGCAGAAGACCGCAGTGGGATAAATCTAAAAGATCTTGTCCAAGATCCTTCTTTGTTGGGTGGGACTATATCGGCATACAAGATAGTACCAGATGAAATAGAAGAAATCAAGAAATTCCCAACATTCCCATTTTGTGGGCTCCAGAAAGGGGCCACAAAAGAAGTAATAGAGCGGGAAGCGCCAGGGATGGCCCTGGCAATGCTGATGGGATCGCTCAATGTCACACCTCTGGGCATGCTCTCTAGACCAGTGTGTGGAATAAGGGGGAAAACTCTGATAATTAACCTACCTGGTAGCAAGAAAGGATCT…	MATEGMILTNHDHQIRVGVLTVSDSCFRNLAEDRSGINLKDLVQDPSLLGGTISAYKIVPDEIEEIKKFPTFPFCGLQKGATKEVIEREAPGMALAMLMGSLNVTPLGMLSRPVCGIRGKTLIINLPGSKKGSQIPDSIISRGVQVLPRDTASLSTTPSESPRAQATSRLSTASCPTPKVQSRCSSKENILRASHSAVDITKVARRHRMSPFPLTSMDKAFITVLEMTPVLGTEIINYRDGMGRVLAQDVYAKDNLPPFPASVKDGYAVRAADGPGDRFIIGESQAGEQPTQTVMPGQVMRVTTGAPIPCGADAVVQVEDTELIRESDDGTEELEVRILVQARPGQDIRPIGHDIKRGECVLAKGTHMGPSEIGLLATVGVTEVEVNKFPVVAVMSTGN…	lcl|GPHN_132:8-1891_ORF1_GPHN_132:7:1890	['GPHN_132_ORF1']
GPHN_133	ORF1	647	70.32	GPHN	E40	ATGGCCCTGGCAATG	ATGGCCCTGGCAATGCTGATGGGATCGCTCAATGTCACACCTCTGGGCATGCTCTCTAGACCAGTGTGTGGAATAAGGGGGAAAACTCTGATAATTAACCTACCTGGTAGCAAGAAAGGATCTCAGGAATGCTTTCAGTTCATACTGCCAGCTCTACCTCATGCCATTGACCTTTTACGTGATGCCATTGTAAAAGTAAAGGAGGTGCATGATGAACTTGAAGATTTACCTTCCCCACCACCTCCTCTCTCTCCACCTCCTACAACTAGCCCACATAAACAGACAGAAGACAAAGGAGTTCAGTGTGAAGAAGAGGAAGAAGAAAAGAAAGACAGTGGTGTAGCTTCAACAGAAGATAGTTCCTCATCACATATAACTGCAGCAGCTCTTGCTGCAAAG…	MALAMLMGSLNVTPLGMLSRPVCGIRGKTLIINLPGSKKGSQECFQFILPALPHAIDLLRDAIVKVKEVHDELEDLPSPPPPLSPPPTTSPHKQTEDKGVQCEEEEEEKKDSGVASTEDSSSSHITAAALAAKIPDSIISRGVQVLPRDTASLSTTPSESPRAQATSRLSTASCPTPKLHSRLEGLKDELWRNRGYDLRVQSRCSSKENILRASHSAVDITKVARRHRMSPFPLTSMDKAFITVLEMTPVLGTEIINYRDGMGRVLAQDVYAKDNLPPFPASVKDGYAVRAADGPGDRFIIGESQAGEQPTQTVMPGQVMRVTTGAPIPCGADAVVQVEDTELIRESDDGTEELEVRILVQARPGQDIRPIGHDIKRGECVLAKGTHMGPSEIGLLATV…	lcl|GPHN_133:201-2144_ORF1_GPHN_133:200:2143	['GPHN_133_ORF1']
GPHN_134	ORF1	347	37.43	GPHN	PTC	ATGGCGACCGAGGGA	ATGGCGACCGAGGGAATGATCCTCACCAACCACGACCATCAAATCCGTGTCGGAGTCCTCACAGGTCACAGTGCTGTAGATATCACCAAGGTGGCTAGAAGACATCGCATGTCTCCTTTTCCCCTGACGTCTATGGACAAAGCCTTCATTACAGTCCTGGAGATGACTCCGGTGCTTGGTACAGAAATCATCAATTACCGAGATGGAATGGGGCGAGTCCTTGCTCAAGATGTATATGCAAAAGACAACCTACCCCCATTCCCTGCATCAGTAAAAGATGGCTATGCTGTTCGAGCTGCTGATGGTCCAGGGGATCGTTTCATCATTGGGGAATCCCAAGCTGGTGAGCAGCCAACTCAGACAGTAATGCCAGGACAAGTGATGCGGGTTACAACAGGT…	MATEGMILTNHDHQIRVGVLTGHSAVDITKVARRHRMSPFPLTSMDKAFITVLEMTPVLGTEIINYRDGMGRVLAQDVYAKDNLPPFPASVKDGYAVRAADGPGDRFIIGESQAGEQPTQTVMPGQVMRVTTGAPIPCGADAVVQVEDTELIRESDDGTEELEVRILVQARPGQDIRPIGHDIKRGECVLAKGTHMGPSEIGLLATVGVTEVEVNKFPVVAVMSTGNELLNPEDDLLPGKIRDSNRSTLLATIQEHGYPTINLGIVGDNPDDLLNALNEGISRADVIITSGGVSMGEKDYLKQVLDIDLHAQIHFGRVFMKPGLPTTFATLDIDGVRKIIFALPVIV	lcl|GPHN_134:8-1051_ORF1_GPHN_134:7:1050	['GPHN_134_ORF1']
GPHN_135	ORF1	167	18.06	GPHN	PTC	ATGGCGACCGAGGGA	ATGGCGACCGAGGGAATGATCCTCACCAACCACGACCATCAAATCCGTGTCGGAGTCCTCACAGTGAGTGATAGCTGCTTCAGGAATCTTGCAGAAGACCGCAGTGGGATAAATCTAAAAGATCTTGTCCAAGATCCTTCTTTGTTGGGTGGGACTATATCGGCATACAAGATAGTACCAGATGAAATAGAAGAAATCAAGGAAACACTCATAGACTGGTGTGATGAAAAGGAACTTAATTTAATATTAACAACTGGAGGAACGGGGTTTGCACCACGAGATGTCACTCCAGAGAAATTCCCAACATTCCCATTTTGTGGGCTCCAGAAAGGGGCCACAAAAGAAGTAATAGAGCGGGAAGCGCCAGGGATGGCCCTGGCAATGCTGATGGGATCGCTC…	MATEGMILTNHDHQIRVGVLTVSDSCFRNLAEDRSGINLKDLVQDPSLLGGTISAYKIVPDEIEEIKETLIDWCDEKELNLILTTGGTGFAPRDVTPEKFPTFPFCGLQKGATKEVIEREAPGMALAMLMGSLNVTPLGMLSRPVCGIRGKTLIINLPGSKKGSQPT	lcl|GPHN_135:8-511_ORF1_GPHN_135:7:510	['GPHN_135_ORF1', 'GPHN_261_ORF1']
	ORF2	577	62.72	GPHN	E40	CTGGTAGCAAGAAAG	CTGGTAGCAAGAAAGGATCTCAGCCCACATAAACAGACAGAAGACAAAGGAGTTCAGTGTGAAGAAGAGGAAGAAGAAAAGAAAGACAGTGGTGTAGCTTCAACAGAAGATAGTTCCTCATCACATATAACTGCAGCAGCTCTTGCTGCAAAGATTCCAGACTCCATCATTTCTCGTGGTGTTCAGGTGCTCCCACGAGACACAGCCTCCCTTAGCACTACTCCTTCAGAATCGCCCCGTGCTCAGGCTACATCTCGCCTCTCTACAGCTTCTTGTCCAACACCAAAACAAATTAGACGGCCGGATGAAAGCAAAGGAGTTGCTAGTAGAGTTGGATCCCTCAAATATCTATTATCACTGGGAGATTTTGTACATAAAACATTTAAGGTCCAGTCCAGG…	MVARKDLSPHKQTEDKGVQCEEEEEEKKDSGVASTEDSSSSHITAAALAAKIPDSIISRGVQVLPRDTASLSTTPSESPRAQATSRLSTASCPTPKQIRRPDESKGVASRVGSLKYLLSLGDFVHKTFKVQSRCSSKENILRASHSAVDITKVARRHRMSPFPLTSMDKAFITVLEMTPVLGTEIINYRDGMGRVLAQDVYAKDNLPPFPASVKDGYAVRAADGPGDRFIIGESQAGEQPTQTVMPGQVMRVTTGAPIPCGADAVVQVEDTELIRESDDGTEELEVRILVQARPGQDIRPIGHDIKRGECVLAKGTHMGPSEIGLLATVGVTEVEVNKFPVVAVMSTGNELLNPEDDLLPGKIRDSNRSTLLATIQEHGYPTINLGIVGDNPDDLLNAL…	lcl|GPHN_135:480-2213_ORF2_GPHN_135:479:2212	['GPHN_135_ORF2']
GPHN_136	ORF1	718	78.02	GPHN	E40	ATGGCGACCGAGGGA	ATGGCGACCGAGGGAATGATCCTCACCAACCACGACCATCAAATCCGTGTCGGAGTCCTCACAGTGAGTGATAGCTGCTTCAGGAATCTTGCAGAAGACCGCAGTGGGATAAATCTAAAAGATCTTGTCCAAGATCCTTCTTTGTTGGGTGGGACTATATCGGCATACAAGATAGTACCAGATGAAATAGAAGAAATCAAGGAAACACTCATAGACTGGTGTGATGAAAAGGAACTTAATTTAATATTAACAACTGGAGGAACGGGGTTTGCACCACGAGATGTCACTCCAGAGAAATTCCCAACATTCCCATTTTGTGGGCTCCAGAAAGGGGCCACAAAAGAAGTAATAGAGCGGGAAGCGCCAGGGATGGCCCTGGCAATGCTGATGGGATCGCTC…	MATEGMILTNHDHQIRVGVLTVSDSCFRNLAEDRSGINLKDLVQDPSLLGGTISAYKIVPDEIEEIKETLIDWCDEKELNLILTTGGTGFAPRDVTPEKFPTFPFCGLQKGATKEVIEREAPGMALAMLMGSLNVTPLGMLSRPVCGIRGKTLIINLPGSKKGSQECFQFILPALPHAIDLLRDAIVKVKEVHDELEDLPSPPPPLSPPPTTSPHKQTEDKGVQCEEEEEEKKDSGVASTEDSSSSHITAAALAAKARLPSCSSTYSVSEVQSRCSSKENILRASHSAVDITKVARRHRMSPFPLTSMDKAFITVLEMTPVLGTEIINYRDGMGRVLAQDVYAKDNLPPFPASVKDGYAVRAADGPGDRFIIGESQAGEQPTQTVMPGQVMRVTTGAPI…	lcl|GPHN_136:8-2164_ORF1_GPHN_136:7:2163	['GPHN_136_ORF1']
GPHN_137	ORF1	684	74	GPHN	E40	ATGGCGACCGAGGGA	ATGGCGACCGAGGGAATGATCCTCACCAACCACGACCATCAAATCCGTGTCGGAGTCCTCACAGTGAGTGATAGCTGCTTCAGGAATCTTGCAGAAGACCGCAGTGGGATAAATCTAAAAGATCTTGTCCAAGATCCTTCTTTGTTGGGTGGGACTATATCGGCATACAAGATAGTACCAGATGAAATAGAAGAAATCAAGGAAACACTCATAGACTGGTGTGATGAAAAGGAACTTAATTTAATATTAACAACTGGAGGAACGGGGTTTGCACCACGAGATGTCACTCCAGAGGCCACAAAAGAAGTAATAGAGCGGGAAGCGCCAGGGATGGCCCTGGCAATGCTGATGGGATCGCTCAATGTCACACCTCTGGGCATGCTCTCTAGACCAGTGTGT…	MATEGMILTNHDHQIRVGVLTVSDSCFRNLAEDRSGINLKDLVQDPSLLGGTISAYKIVPDEIEEIKETLIDWCDEKELNLILTTGGTGFAPRDVTPEATKEVIEREAPGMALAMLMGSLNVTPLGMLSRPVCGIRGKTLIINLPGSKKGSQECFQFILPALPHAIDLLRDAIVKVKEVHDELEDLPSPPPPLSPPPTTSPHKQTEDKGVQCEEEEEEKKDSGVASTEDSSSSHITAAALAAKIPDSIISRGVQVLPRDTASLSTTPSESPRAQATSRLSTASCPTPKLHSRLEGLKDELWRNRGYDLRVQSRCSSKENILRASHSAVDITKVARRHRMSPFPLTSMDKAFITVLEMTPVLGTEIINYRDGMGRVLAQDVYAKDNLPPFPASVKDGYAV…	lcl|GPHN_137:8-2062_ORF1_GPHN_137:7:2061	['GPHN_137_ORF1']
GPHN_138	ORF1	672	73.2	GPHN	E40	ATGGCGACCGAGGGA	ATGGCGACCGAGGGAATGATCCTCACCAACCACGACCATCAAATCCGTGTCGGAGTCCTCACAGTGAGTGATAGCTGCTTCAGGAATCTTGCAGAAGACCGCAGTGGGATAAATCTAAAAGATCTTGTCCAAGATCCTTCTTTGTTGGGTGGGACTATATCGGCATACAAGATAGTACCAGATGAAATAGAAGAAATCAAGGAAACACTCATAGACTGGTGTGATGAAAAGGAACTTAATTTAATATTAACAACTGGAGGAACGGGGTTTGCACCACGAGATGTCACTCCAGAGGCCACAAAAGAAGTAATAGAGCGGGAAGCGCCAGGGATGGCCCTGGCAATGCTGATGGGATCGCTCAATGTCACACCTCTGGGCATGCTCTCTAGACCAGTGTGT…	MATEGMILTNHDHQIRVGVLTVSDSCFRNLAEDRSGINLKDLVQDPSLLGGTISAYKIVPDEIEEIKETLIDWCDEKELNLILTTGGTGFAPRDVTPEATKEVIEREAPGMALAMLMGSLNVTPLGMLSRPVCGIRGKTLIINLPGSKKGSQECFQFILPALPHAIDLLRDAIVKVKEVHDELEDLPSPPPPLSPPPTTSPHKQTEDKGVQCEEEEEEKKDSGVASTEDSSSSHITAAALAAKIPDSIISRGVQVLPRDTASLSTTPSESPRAQATSRLSTASCPTPKQIRRPDESKGVASRVGSLKYLLSLGDFVHKTFKARLPSCSSTYSVSEVQSRCSSKENILRASHSAVDITKVARRHRMSPFPLTSMDKAFITVLEMTPVLGTEIINYRDGMG…	lcl|GPHN_138:8-2026_ORF1_GPHN_138:7:2025	['GPHN_138_ORF1']
	ORF2	111	13.08	unknown	PTC	CTGCAGCAGCTCTTG	CTGCAGCAGCTCTTGCTGCAAAGATTCCAGACTCCATCATTTCTCGTGGTGTTCAGGTGCTCCCACGAGACACAGCCTCCCTTAGCACTACTCCTTCAGAATCGCCCCGTGCTCAGGCTACATCTCGCCTCTCTACAGCTTCTTGTCCAACACCAAAACAAATTAGACGGCCGGATGAAAGCAAAGGAGTTGCTAGTAGAGTTGGATCCCTCAAATATCTATTATCACTGGGAGATTTTGTACATAAAACATTTAAGGCTCGGCTTCCGTCGTGCTCATCTACCTATAGTGTATCTGAGGTCCAGTCCAGGTGCAGCAGCAAGGAGAACATTCTAA	MQQLLLQRFQTPSFLVVFRCSHETQPPLALLLQNRPVLRLHLASLQLLVQHQNKLDGRMKAKELLVELDPSNIYYHWEILYIKHLRLGFRRAHLPIVYLRSSPGAAARRTF	lcl|GPHN_138:714-1049_ORF2_GPHN_138:713:1048	['GPHN_117_ORF2', 'GPHN_138_ORF2', 'GPHN_169_ORF1', 'GPHN_23_ORF2', 'GPHN_274_ORF2', 'GPHN_277_ORF2', 'GPHN_81_ORF2']
GPHN_139	ORF1	206	22.9	GPHN	E40	TTGTCCAACACCAAA	TTGTCCAACACCAAAAGTCCAGTCCAGGTGCAGCAGCAAGGAGAACATTCTAAGAGCCACCCAGATGACTTACTCAATGCCTTGAATGAGGGTATCAGCCGTGCTGATGTCATCATCACGTCAGGAGGTGTGTCCATGGGGGAAAAGGACTATCTCAAGCAGGTGCTGGACATTGATCTTCATGCTCAGATCCATTTTGGCAGAGTTTTTATGAAGCCAGGCTTGCCAACAACATTTGCAACTTTGGATATTGATGGTGTAAGAAAAATTATTTTTGCACTACCAGGGAATCCTGTATCAGCTGTGGTCACCTGCAACCTCTTTGTTGTACCTGCACTGAGAAAGATGCAGGGTATCTTGGATCCTCGGCCAACCATCATCAAAGCCAGGTTATCGTGT…	MSNTKSPVQVQQQGEHSKSHPDDLLNALNEGISRADVIITSGGVSMGEKDYLKQVLDIDLHAQIHFGRVFMKPGLPTTFATLDIDGVRKIIFALPGNPVSAVVTCNLFVVPALRKMQGILDPRPTIIKARLSCDVKLDPRPEYHRCILTWHHQEPLPWAQSTGNQMSSRLMSMRSANGLLMLPPKTEQYVELHKGEVVDVMVIGRL	lcl|GPHN_139:895-1515_ORF1_GPHN_139:894:1514	['GPHN_139_ORF1', 'GPHN_25_ORF1']
	ORF2	323	34.84	GPHN	PTC	ATGGCGACCGAGGGA	ATGGCGACCGAGGGAATGATCCTCACCAACCACGACCATCAAATCCGTGTCGGAGTCCTCACAGTGAGTGATAGCTGCTTCAGGAATCTTGCAGAAGACCGCAGTGGGATAAATCTAAAAGATCTTGTCCAAGATCCTTCTTTGTTGGGTGGGACTATATCGGCATACAAGATAGTACCAGATGAAATAGAAGAAATCAAGGAAACACTCATAGACTGGTGTGATGAAAAGGAACTTAATTTAATATTAACAACTGGAGGAACGGGGTTTGCACCACGAGATGTCACTCCAGAGAAATTCCCAACATTCCCATTTTGTGGGCTCCAGAAAGGGGCCACAAAAGAAGTAATAGAGCGGGAAGCGCCAGGGATGGCCCTGGCAATGCTGATGGGATCGCTC…	MATEGMILTNHDHQIRVGVLTVSDSCFRNLAEDRSGINLKDLVQDPSLLGGTISAYKIVPDEIEEIKETLIDWCDEKELNLILTTGGTGFAPRDVTPEKFPTFPFCGLQKGATKEVIEREAPGMALAMLMGSLNVTPLGMLSRPVCGIRGKTLIINLPGSKKGSQECFQFILPALPHAIDLLRDAIVKVKEVHDELEDLPSPPPPLSPPPTTSPHKQTEDKGVQCEEEEEEKKDSGVASTEDSSSSHITAAALAAKIPDSIISRGVQVLPRDTASLSTTPSESPRAQATSRLSTASCPTPKVQSRCSSKENILRATQMTYSMP	lcl|GPHN_139:8-979_ORF2_GPHN_139:7:978	['GPHN_139_ORF2']
GPHN_140	ORF1	703	76	GPHN	E40	ATGGCGACCGAGGGA	ATGGCGACCGAGGGAATGATCCTCACCAACCACGACCATCAAATCCGTGTCGGAGTCCTCACAGTGAGTGATAGCTGCTTCAGGAATCTTGCAGAAGACCGCAGTGGGATAAATCTAAAAGATCTTGTCCAAGATCCTTCTTTGTTGGGTGGGACTATATCGGCATACAAGATAGTACCAGATGAAATAGAAGAAATCAAGGAAACACTCATAGACTGGTGTGATGAAAAGGAACTTAATTTAATATTAACAACTGGAGGAACGGGGTTTGCACCACGAGATGTCACTCCAGAGAAATTCCCAACATTCCCATTTTGTGGGCTCCAGAAAGGGGCCACAAAAGAAGTAATAGAGCGGGAAGCGCCAGGGATGGCCCTGGCAATGCTGATGGGATCGCTC…	MATEGMILTNHDHQIRVGVLTVSDSCFRNLAEDRSGINLKDLVQDPSLLGGTISAYKIVPDEIEEIKETLIDWCDEKELNLILTTGGTGFAPRDVTPEKFPTFPFCGLQKGATKEVIEREAPGMALAMLMGSLNVTPLGMLSRPVCGIRGKTLIINLPGSKKGSQECFQFILPALPHAIDLLRDAIVKVKEVHDELEDLPSPPPPLSPPPTTSPHKQTEDKGVQCEEEEEEKKDSGVASTEDSSSSHITAAALAAKIPDSIISRGVQVLPRDTASLSTTPSESPRAQATSRLSTASCPTPKVQSRCSSKENILRANGMGRVLAQDVYAKDNLPPFPASVKDGYAVRAADGPGDRFIIGESQAGEQPTQTVMPGQVMRVTTGAPIPCGADAVVQVEDTEL…	lcl|GPHN_140:8-2119_ORF1_GPHN_140:7:2118	['GPHN_140_ORF1']
GPHN_141	ORF1	712	77.73	GPHN	E40	ATGGCGACCGAGGGA	ATGGCGACCGAGGGAATGATCCTCACCAACCACGACCATCAAATCCGTGTCGGAGTCCTCACAGTGAGTGATAGCTGCTTCAGGAATCTTGCAGAAGACCGCAGTGGGATAAATCTAAAAGATCTTGTCCAAGATCCTTCTTTGTTGGGTGGGACTATATCGGCATACAAGATAGTACCAGATGAAATAGAAGAAATCAAGGAAACACTCATAGACTGGTGTGATGAAAAGGAACTTAATTTAATATTAACAACTGGAGGAACGGGGTTTGCACCACGAGATGTCACTCCAGAGAAATTCCCAACATTCCCATTTTGTGGGCTCCAGAAAGGGGCCACAAAAGAAGTAATAGAGCGGGAAGCGCCAGGGATGGCCCTGGCAATGCTGATGGGATCGCTC…	MATEGMILTNHDHQIRVGVLTVSDSCFRNLAEDRSGINLKDLVQDPSLLGGTISAYKIVPDEIEEIKETLIDWCDEKELNLILTTGGTGFAPRDVTPEKFPTFPFCGLQKGATKEVIEREAPGMALAMLMGSLNVTPLGMLSRPVCGIRGKTLIINLPGSKKGSQIPDSIISRGVQVLPRDTASLSTTPSESPRAQATSRLSTASCPTPKQIRRPDESKGVASRVGSLKYLLSLGDFVHKTFKLHSRLEGLKDELWRNRGYDLRVQSRCSSKENILRASHSAVDITKVARRHRMSPFPLTSMDKAFITVLEMTPVLGTEIINYRDGMGRVLAQDVYAKDNLPPFPASVKDGYAVRAADGPGDRFIIGESQAGEQPTQTVMPGQVMRVTTGAPIPCGADA…	lcl|GPHN_141:8-2146_ORF1_GPHN_141:7:2145	['GPHN_141_ORF1']
	ORF2	105	12.17	unknown	PTC	CTGGTAGCAAGAAAG	CTGGTAGCAAGAAAGGATCTCAGATTCCAGACTCCATCATTTCTCGTGGTGTTCAGGTGCTCCCACGAGACACAGCCTCCCTTAGCACTACTCCTTCAGAATCGCCCCGTGCTCAGGCTACATCTCGCCTCTCTACAGCTTCTTGTCCAACACCAAAACAAATTAGACGGCCGGATGAAAGCAAAGGAGTTGCTAGTAGAGTTGGATCCCTCAAATATCTATTATCACTGGGAGATTTTGTACATAAAACATTTAAGCTCCACTCTAGATTGGAAGGGCTTAAAGATGAACTCTGGAGGAATAGAGGCTACGACTTAA	MVARKDLRFQTPSFLVVFRCSHETQPPLALLLQNRPVLRLHLASLQLLVQHQNKLDGRMKAKELLVELDPSNIYYHWEILYIKHLSSTLDWKGLKMNSGGIEATT	lcl|GPHN_141:480-797_ORF2_GPHN_141:479:796	['GPHN_141_ORF2', 'GPHN_165_ORF2', 'GPHN_237_ORF2', 'GPHN_26_ORF2', 'GPHN_272_ORF2']
GPHN_142	ORF1	805	87.39	GPHN	E40	ATGGCGACCGAGGGA	ATGGCGACCGAGGGAATGATCCTCACCAACCACGACCATCAAATCCGTGTCGGAGTCCTCACAGTGAGTGATAGCTGCTTCAGGAATCTTGCAGAAGACCGCAGTGGGATAAATCTAAAAGATCTTGTCCAAGATCCTTCTTTGTTGGGTGGGACTATATCGGCATACAAGATAGTACCAGATGAAATAGAAGAAATCAAGGAAACACTCATAGACTGGTGTGATGAAAAGGAACTTAATTTAATATTAACAACTGGAGGAACGGGGTTTGCACCACGAGATGTCACTCCAGAGGCCACAAAAGAAGTAATAGAGCGGGAAGCGCCAGGGATGGCCCTGGCAATGCTGATGGGATCGCTCAATGTCACACCTCTGGGCATGCTCTCTAGACCAGTGTGT…	MATEGMILTNHDHQIRVGVLTVSDSCFRNLAEDRSGINLKDLVQDPSLLGGTISAYKIVPDEIEEIKETLIDWCDEKELNLILTTGGTGFAPRDVTPEATKEVIEREAPGMALAMLMGSLNVTPLGMLSRPVCGIRGKTLIINLPGSKKGSQECFQFILPALPHAIDLLRDAIVKVKEVHDELEDLPSPPPPLSPPPTTSPHKQTEDKGVQCEEEEEEKKDSGVASTEDSSSSHITAAALAAKKHPFYTSPALFMANHGQPIPGLISYSHHATGSADKRIPDSIISRGVQVLPRDTASLSTTPSESPRAQATSRLSTASCPTPKQIRRPDESKGVASRVGSLKYLLSLGDFVHKTFKVQSRCSSKENILRASHSAVDITKVARRHRMSPFPLTSMDKAF…	lcl|GPHN_142:8-2425_ORF1_GPHN_142:7:2424	['GPHN_142_ORF1']
	ORF2	133	15.24	unknown	PTC	CTGCAGCAGCTCTTG	CTGCAGCAGCTCTTGCTGCAAAGAAGCATCCATTCTACACCAGTCCTGCTCTTTTCATGGCAAATCATGGGCAGCCCATCCCTGGTCTCATCAGTTATTCCCATCATGCAACAGGCAGTGCAGATAAACGGATTCCAGACTCCATCATTTCTCGTGGTGTTCAGGTGCTCCCACGAGACACAGCCTCCCTTAGCACTACTCCTTCAGAATCGCCCCGTGCTCAGGCTACATCTCGCCTCTCTACAGCTTCTTGTCCAACACCAAAACAAATTAGACGGCCGGATGAAAGCAAAGGAGTTGCTAGTAGAGTTGGATCCCTCAAATATCTATTATCACTGGGAGATTTTGTACATAAAACATTTAAGGTCCAGTCCAGGTGCAGCAGCAAGGAGAACATTC…	MQQLLLQRSIHSTPVLLFSWQIMGSPSLVSSVIPIMQQAVQINGFQTPSFLVVFRCSHETQPPLALLLQNRPVLRLHLASLQLLVQHQNKLDGRMKAKELLVELDPSNIYYHWEILYIKHLRSSPGAAARRTF	lcl|GPHN_142:714-1115_ORF2_GPHN_142:713:1114	['GPHN_142_ORF2', 'GPHN_212_ORF2']
GPHN_143	ORF1	699	75.31	GPHN	E40	ATGGCGACCGAGGGA	ATGGCGACCGAGGGAATGATCCTCACCAACCACGACCATCAAATCCGTGTCGGAGTCCTCACAGTGAGTGATAGCTGCTTCAGGAATCTTGCAGAAGACCGCAGTGGGATAAATCTAAAAGATCTTGTCCAAGATCCTTCTTTGTTGGGTGGGACTATATCGGCATACAAGATAGTACCAGATGAAATAGAAGAAATCAAGGAAACACTCATAGACTGGTGTGATGAAAAGGAACTTAATTTAATATTAACAACTGGAGGAACGGGGTTTGCACCACGAGATGTCACTCCAGAGGCCACAAAAGAAGTAATAGAGCGGGAAGCGCCAGGGATGGCCCTGGCAATGCTGATGGGATCGCTCAATGTCACACCTCTGGGCATGCTCTCTAGACCAGTGTGT…	MATEGMILTNHDHQIRVGVLTVSDSCFRNLAEDRSGINLKDLVQDPSLLGGTISAYKIVPDEIEEIKETLIDWCDEKELNLILTTGGTGFAPRDVTPEATKEVIEREAPGMALAMLMGSLNVTPLGMLSRPVCGIRGKTLIINLPGSKKGSQECFQFILPALPHAIDLLRDAIVKVKEVHDELEDLPSPPPPLSPPPTTSPHKQTEDKGVQCEEEEEEKKDSGVASTEDSSSSHITAAALAAKKHPFYTSPALFMANHGQPIPGLISYSHHATGSADKRIPDSIISRGVQVLPRDTASLSTTPSESPRAQATSRLSTASCPTPKVQSRCSSKENILRASHSAVDITKVARRHRMSPFPLTSMDKAFITVLEMTPVLGTEIINYRDGMGRVLAQDVYAKD…	lcl|GPHN_143:8-2107_ORF1_GPHN_143:7:2106	['GPHN_143_ORF1']
	ORF2	100	11.18	unknown	PTC	CTGCAGCAGCTCTTG	CTGCAGCAGCTCTTGCTGCAAAGAAGCATCCATTCTACACCAGTCCTGCTCTTTTCATGGCAAATCATGGGCAGCCCATCCCTGGTCTCATCAGTTATTCCCATCATGCAACAGGCAGTGCAGATAAACGGATTCCAGACTCCATCATTTCTCGTGGTGTTCAGGTGCTCCCACGAGACACAGCCTCCCTTAGCACTACTCCTTCAGAATCGCCCCGTGCTCAGGCTACATCTCGCCTCTCTACAGCTTCTTGTCCAACACCAAAAGTCCAGTCCAGGTGCAGCAGCAAGGAGAACATTCTAA	MQQLLLQRSIHSTPVLLFSWQIMGSPSLVSSVIPIMQQAVQINGFQTPSFLVVFRCSHETQPPLALLLQNRPVLRLHLASLQLLVQHQKSSPGAAARRTF	lcl|GPHN_143:714-1016_ORF2_GPHN_143:713:1015	['GPHN_105_ORF2', 'GPHN_116_ORF1', 'GPHN_119_ORF1', 'GPHN_143_ORF2', 'GPHN_144_ORF2', 'GPHN_164_ORF1', 'GPHN_171_ORF2', 'GPHN_185_ORF2', 'GPHN_190_ORF2', 'GPHN_241_ORF2', 'GPHN_254_ORF2', 'GPHN_38_ORF2', 'GPHN_4_ORF2', 'GPHN_51_ORF2', 'GPHN_57_ORF2', 'GPHN_77_ORF2', 'GPHN_95_ORF1']
GPHN_144	ORF1	664	71.49	GPHN	PTC	ATGGCGACCGAGGGA	ATGGCGACCGAGGGAATGATCCTCACCAACCACGACCATCAAATCCGTGTCGGAGTCCTCACAGTGAGTGATAGCTGCTTCAGGAATCTTGCAGAAGACCGCAGTGGGATAAATCTAAAAGATCTTGTCCAAGATCCTTCTTTGTTGGGTGGGACTATATCGGCATACAAGATAGTACCAGATGAAATAGAAGAAATCAAGGAAACACTCATAGACTGGTGTGATGAAAAGGAACTTAATTTAATATTAACAACTGGAGGAACGGGGTTTGCACCACGAGATGTCACTCCAGAGGCCACAAAAGAAGTAATAGAGCGGGAAGCGCCAGGGATGGCCCTGGCAATGCTGATGGGATCGCTCAATGTCACACCTCTGGGCATGCTCTCTAGACCAGTGTGT…	MATEGMILTNHDHQIRVGVLTVSDSCFRNLAEDRSGINLKDLVQDPSLLGGTISAYKIVPDEIEEIKETLIDWCDEKELNLILTTGGTGFAPRDVTPEATKEVIEREAPGMALAMLMGSLNVTPLGMLSRPVCGIRGKTLIINLPGSKKGSQECFQFILPALPHAIDLLRDAIVKVKEVHDELEDLPSPPPPLSPPPTTSPHKQTEDKGVQCEEEEEEKKDSGVASTEDSSSSHITAAALAAKKHPFYTSPALFMANHGQPIPGLISYSHHATGSADKRIPDSIISRGVQVLPRDTASLSTTPSESPRAQATSRLSTASCPTPKVQSRCSSKENILRASHSAVDITKVARRHRMSPFPLTSMDKAFITVLEMTPVLGTEIINYRDGMGRVLAQDVYAKD…	lcl|GPHN_144:8-2002_ORF1_GPHN_144:7:2001	['GPHN_144_ORF1']
	ORF2	100	11.18	unknown	PTC	CTGCAGCAGCTCTTG	CTGCAGCAGCTCTTGCTGCAAAGAAGCATCCATTCTACACCAGTCCTGCTCTTTTCATGGCAAATCATGGGCAGCCCATCCCTGGTCTCATCAGTTATTCCCATCATGCAACAGGCAGTGCAGATAAACGGATTCCAGACTCCATCATTTCTCGTGGTGTTCAGGTGCTCCCACGAGACACAGCCTCCCTTAGCACTACTCCTTCAGAATCGCCCCGTGCTCAGGCTACATCTCGCCTCTCTACAGCTTCTTGTCCAACACCAAAAGTCCAGTCCAGGTGCAGCAGCAAGGAGAACATTCTAA	MQQLLLQRSIHSTPVLLFSWQIMGSPSLVSSVIPIMQQAVQINGFQTPSFLVVFRCSHETQPPLALLLQNRPVLRLHLASLQLLVQHQKSSPGAAARRTF	lcl|GPHN_144:714-1016_ORF2_GPHN_144:713:1015	['GPHN_105_ORF2', 'GPHN_116_ORF1', 'GPHN_119_ORF1', 'GPHN_143_ORF2', 'GPHN_144_ORF2', 'GPHN_164_ORF1', 'GPHN_171_ORF2', 'GPHN_185_ORF2', 'GPHN_190_ORF2', 'GPHN_241_ORF2', 'GPHN_254_ORF2', 'GPHN_38_ORF2', 'GPHN_4_ORF2', 'GPHN_51_ORF2', 'GPHN_57_ORF2', 'GPHN_77_ORF2', 'GPHN_95_ORF1']
GPHN_145	ORF1	711	77.15	GPHN	E40	ATGGCGACCGAGGGA	ATGGCGACCGAGGGAATGATCCTCACCAACCACGACCATCAAATCCGTGTCGGAGTCCTCACAGTGAGTGATAGCTGCTTCAGGAATCTTGCAGAAGACCGCAGTGGGATAAATCTAAAAGATCTTGTCCAAGATCCTTCTTTGTTGGGTGGGACTATATCGGCATACAAGATAGTACCAGATGAAATAGAAGAAATCAAGGAAACACTCATAGACTGGTGTGATGAAAAGGAACTTAATTTAATATTAACAACTGGAGGAACGGGGTTTGCACCACGAGATGTCACTCCAGAGGCCACAAAAGAAGTAATAGAGCGGGAAGCGCCAGGGATGGCCCTGGCAATGCTGATGGGATCGCTCAATGTCACACCTCTGGGCATGCTCTCTAGACCAGTGTGT…	MATEGMILTNHDHQIRVGVLTVSDSCFRNLAEDRSGINLKDLVQDPSLLGGTISAYKIVPDEIEEIKETLIDWCDEKELNLILTTGGTGFAPRDVTPEATKEVIEREAPGMALAMLMGSLNVTPLGMLSRPVCGIRGKTLIINLPGSKKGSQECFQFILPALPHAIDLLRDAIVKVKEVHDELEDLPSPPPPLSPPPTTSPHKQTEDKGVQCEEEEEEKKDSGVASTEDSSSSHITAAALAAKIPDSIISRGVQVLPRDTASLSTTPSESPRAQATSRLSTASCPTPKLHSRLEGLKDELWRNRGYDLRVQSRCSSKENILRANGMGRVLAQDVYAKDNLPPFPASVKDGYAVRAADGPGDRFIIGESQAGEQPTQTVMPGQVMRVTTGAPIPCGADAV…	lcl|GPHN_145:8-2143_ORF1_GPHN_145:7:2142	['GPHN_145_ORF1']
GPHN_146	ORF1	537	57.77	GPHN	PTC	ATGGCGACCGAGGGA	ATGGCGACCGAGGGAATGATCCTCACCAACCACGACCATCAAATCCGTGTCGGAGTCCTCACAGTGAGTGATAGCTGCTTCAGGAATCTTGCAGAAGACCGCAGTGGGATAAATCTAAAAGATCTTGTCCAAGATCCTTCTTTGTTGGGTGGGACTATATCGGCATACAAGATAGTACCAGATGAAATAGAAGAAATCAAGGAAACACTCATAGACTGGTGTGATGAAAAGGAACTTAATTTAATATTAACAACTGGAGGAACGGGGTTTGCACCACGAGATGTCACTCCAGAGGCCACAAAAGAAGTAATAGAGCGGGAAGCGCCAGGGATGGCCCTGGCAATGCTGATGGGATCGCTCAATGTCACACCTCTGGGCATGCTCTCTAGACCAGTGTGT…	MATEGMILTNHDHQIRVGVLTVSDSCFRNLAEDRSGINLKDLVQDPSLLGGTISAYKIVPDEIEEIKETLIDWCDEKELNLILTTGGTGFAPRDVTPEATKEVIEREAPGMALAMLMGSLNVTPLGMLSRPVCGIRGKTLIINLPGSKKGSQIPDSIISRGVQVLPRDTASLSTTPSESPRAQATSRLSTASCPTPKVQSRCSSKENILRASHSAVDITKVARRHRMSPFPLTSMDKAFITVLEMTPVLGTEIINYRDGMGRVLAQDVYAKDNLPPFPASVKDGYAVRAADGPGDRFIIGESQAGEQPTQTVMPGQVMRVTTGAPIPCGADAVVQVEDTELIRESDDGTEELEVRILVQARPGQDIRPIGHDIKRGECVLAKGTHMGPSEIGLLATVGV…	lcl|GPHN_146:8-1621_ORF1_GPHN_146:7:1620	['GPHN_146_ORF1']
GPHN_147	ORF1	599	64.74	GPHN	E40	ATGGCGACCGAGGGA	ATGGCGACCGAGGGAATGATCCTCACCAACCACGACCATCAAATCCGTGTCGGAGTCCTCACAGTGAGTGATAGCTGCTTCAGGAATCTTGCAGAAGACCGCAGTGGGATAAATCTAAAAGATCTTGTCCAAGATCCTTCTTTGTTGGGTGGGACTATATCGGCATACAAGATAGTACCAGATGAAATAGAAGAAATCAAGGAAACACTCATAGACTGGTGTGATGAAAAGGAACTTAATTTAATATTAACAACTGGAGGAACGGGGTTTGCACCACGAGATGTCACTCCAGAGGCCACAAAAGAAGTAATAGAGCGGGAAGCGCCAGGGATGGCCCTGGCAATGCTGATGGGATCGCTCAATGTCACACCTCTGGGCATGCTCTCTAGACCAGTGTGT…	MATEGMILTNHDHQIRVGVLTVSDSCFRNLAEDRSGINLKDLVQDPSLLGGTISAYKIVPDEIEEIKETLIDWCDEKELNLILTTGGTGFAPRDVTPEATKEVIEREAPGMALAMLMGSLNVTPLGMLSRPVCGIRGKTLIINLPGSKKGSQIPDSIISRGVQVLPRDTASLSTTPSESPRAQATSRLSTASCPTPKVQSRCSSKENILRANGMGRVLAQDVYAKDNLPPFPASVKDGYAVRAADGPGDRFIIGESQAGEQPTQTVMPGQVMRVTTGAPIPCGADAVVQVEDTELIRESDDGTEELEVRILVQARPGQDIRPIGHDIKRGECVLAKGTHMGPSEIGLLATVGVTEVEVNKFPVVAVMSTGNELLNPEDDLLPGKIRDSNRSTLLATIQE…	lcl|GPHN_147:8-1807_ORF1_GPHN_147:7:1806	['GPHN_147_ORF1']
GPHN_148	ORF1	591	64.33	GPHN	E40	ATGGCGACCGAGGGA	ATGGCGACCGAGGGAATGATCCTCACCAACCACGACCATCAAATCCGTGTCGGAGTCCTCACAGTGAGTGATAGCTGCTTCAGGAATCTTGCAGAAGACCGCAGTGGGATAAATCTAAAAGATCTTGTCCAAGATCCTTCTTTGTTGGGTGGGACTATATCGGCATACAAGATAGTACCAGATGAAATAGAAGAAATCAAGGAAACACTCATAGACTGGTGTGATGAAAAGGAACTTAATTTAATATTAACAACTGGAGGAACGGGGTTTGCACCACGAGATGTCACTCCAGAGATTCCAGACTCCATCATTTCTCGTGGTGTTCAGGTGCTCCCACGAGACACAGCCTCCCTTAGCACTACTCCTTCAGAATCGCCCCGTGCTCAGGCTACATCTCGC…	MATEGMILTNHDHQIRVGVLTVSDSCFRNLAEDRSGINLKDLVQDPSLLGGTISAYKIVPDEIEEIKETLIDWCDEKELNLILTTGGTGFAPRDVTPEIPDSIISRGVQVLPRDTASLSTTPSESPRAQATSRLSTASCPTPKVQSRCSSKENILRASHSAVDITKVARRHRMSPFPLTSMDKAFITVLEMTPVLGTEIINYRDGMGRVLAQDVYAKDNLPPFPASVKDGYAVRAADGPGDRFIIGESQAGEQPTQTVMPGQVMRVTTGAPIPCGADAVVQVEDTELIRESDDGTEELEVRILVQARPGQDIRPIGHDIKRGECVLAKGTHMGPSEIGLLATVGVTEVEVNKFPVVAVMSTGNELLNPEDDLLPGKIRDSNRSTLLATIQEHGYPTINL…	lcl|GPHN_148:8-1783_ORF1_GPHN_148:7:1782	['GPHN_148_ORF1']
GPHN_149	ORF1	739	80.4	GPHN	E40	ATGGCGACCGAGGGA	ATGGCGACCGAGGGAATGATCCTCACCAACCACGACCATCAAATCCGTGTCGGAGTCCTCACAGTGAGTGATAGCTGCTTCAGGAATCTTGCAGAAGACCGCAGTGGGATAAATCTAAAAGATCTTGTCCAAGATCCTTCTTTGTTGGGTGGGACTATATCGGCATACAAGATAGTACCAGATGAAATAGAAGAAATCAAGAAATTCCCAACATTCCCATTTTGTGGGCTCCAGAAAGGGGCCACAAAAGAAGTAATAGAGCGGGAAGCGCCAGGGATGGCCCTGGCAATGCTGATGGGATCGCTCAATGTCACACCTCTGGGCATGCTCTCTAGACCAGTGTGTGGAATAAGGGGGAAAACTCTGATAATTAACCTACCTGGTAGCAAGAAAGGATCT…	MATEGMILTNHDHQIRVGVLTVSDSCFRNLAEDRSGINLKDLVQDPSLLGGTISAYKIVPDEIEEIKKFPTFPFCGLQKGATKEVIEREAPGMALAMLMGSLNVTPLGMLSRPVCGIRGKTLIINLPGSKKGSQECFQFILPALPHAIDLLRDAIVKVKEVHDELEDLPSPPPPLSPPPTTSPHKQTEDKGVQCEEEEEEKKDSGVASTEDSSSSHITAAALAAKIPDSIISRGVQVLPRDTASLSTTPSESPRAQATSRLSTASCPTPKLHSRLEGLKDELWRNRGYDLRVQSRCSSKENILRASHSAVDITKVARRHRMSPFPLTSMDKAFITVLEMTPVLGTEIINYRDGMGRVLAQDVYAKDNLPPFPASVKDGYAVRAADGPGDRFIIGESQAG…	lcl|GPHN_149:8-2227_ORF1_GPHN_149:7:2226	['GPHN_149_ORF1']
GPHN_150	ORF1	721	78.2	GPHN	E40	TTGGGTGGGACTATA	TTGGGTGGGACTATATCGGCATACAAGATAGTACCAGATGAAATAGAAGAAATCAAGGAAACACTCATAGACTGGTGTGATGAAAAGGAACTTAATTTAATATTAACAACTGGAGGAACGGGGTTTGCACCACGAGATGTCACTCCAGAGGCCACAAAAGAAGTAATAGAGCGGGAAGCGCCAGGGATGGCCCTGGCAATGCTGATGGGATCGCTCAATGTCACACCTCTGGGCATGCTCTCTAGACCAGTGTGTGGAATAAGGGGGAAAACTCTGATAATTAACCTACCTGGTAGCAAGAAAGGATCTCAGGAATGCTTTCAGTTCATACTGCCAGCTCTACCTCATGCCATTGACCTTTTACGTGATGCCATTGTAAAAGTAAAGGAGGTGCATGAT…	MGGTISAYKIVPDEIEEIKETLIDWCDEKELNLILTTGGTGFAPRDVTPEATKEVIEREAPGMALAMLMGSLNVTPLGMLSRPVCGIRGKTLIINLPGSKKGSQECFQFILPALPHAIDLLRDAIVKVKEVHDELEDLPSPPPPLSPPPTTSPHKQTEDKGVQCEEEEEEKKDSGVASTEDSSSSHITAAALAAKIPDSIISRGVQVLPRDTASLSTTPSESPRAQATSRLSTASCPTPKQIRRPDESKGVASRVGSLKYLLSLGDFVHKTFKVQSRCSSKENILRASHSAVDITKVARRHRMSPFPLTSMDKAFITVLEMTPVLGTEIINYRDGMGRVLAQDVYAKDNLPPFPASVKDGYAVRAADGPGDRFIIGESQAGEQPTQTVMPGQVMRVTTG…	lcl|GPHN_150:73-2238_ORF1_GPHN_150:72:2237	['GPHN_150_ORF1']
GPHN_151	ORF1	439	47.89	GPHN	E40	TTGTCCAACACCAAA	TTGTCCAACACCAAAAGTCACAGTGCTGTAGATATCACCAAGGTGGCTAGAAGACATCGCATGTCTCCTTTTCCCCTGACGTCTATGGACAAAGCCTTCATTACAGTCCTGGAGATGACTCCGGTGCTTGGTACAGAAATCATCAATTACCGAGATGGAATGGGGCGAGTCCTTGCTCAAGATGTATATGCAAAAGACAACCTACCCCCATTCCCTGCATCAGTAAAAGATGGCTATGCTGTTCGAGCTGCTGATGGTCCAGGGGATCGTTTCATCATTGGGGAATCCCAAGCTGGTGAGCAGCCAACTCAGACAGTAATGCCAGGACAAGTGATGCGGGTTACAACAGGTGCTCCAATCCCCTGCGGTGCTGATGCAGTAGTGCAAGTTGAAGATACT…	MSNTKSHSAVDITKVARRHRMSPFPLTSMDKAFITVLEMTPVLGTEIINYRDGMGRVLAQDVYAKDNLPPFPASVKDGYAVRAADGPGDRFIIGESQAGEQPTQTVMPGQVMRVTTGAPIPCGADAVVQVEDTELIRESDDGTEELEVRILVQARPGQDIRPIGHDIKRGECVLAKGTHMGPSEIGLLATVGVTEVEVNKFPVVAVMSTGNELLNPEDDLLPGKIRDSNRSTLLATIQEHGYPTINLGIVGDNPDDLLNALNEGISRADVIITSGGVSMGEKDYLKQVLDIDLHAQIHFGRVFMKPGLPTTFATLDIDGVRKIIFALPGNPVSAVVTCNLFVVPALRKMQGILDPRPTIIKARLSCDVKLDPRPEYHRCILTWHHQEPLPWAQSTGNQM…	lcl|GPHN_151:626-1945_ORF1_GPHN_151:625:1944	['GPHN_100_ORF1', 'GPHN_101_ORF1', 'GPHN_151_ORF1', 'GPHN_17_ORF1', 'GPHN_182_ORF2', 'GPHN_244_ORF1', 'GPHN_67_ORF1']
	ORF2	182	19.24	GPHN	PTC	ATGGCCCTGGCAATG	ATGGCCCTGGCAATGCTGATGGGATCGCTCAATGTCACACCTCTGGGCATGCTCTCTAGACCAGTGTGTGGAATAAGGGGGAAAACTCTGATAATTAACCTACCTGGTAGCAAGAAAGGATCTCAGGAATGCTTTCAGTTCATACTGCCAGCTCTACCTCATGCCATTGACCTTTTACGTGATGCCATTGTAAAAGTAAAGGAGGTGCATGATGAACTTGAAGATTTACCTTCCCCACCACCTCCTCTCTCTCCACCTCCTACAACTAGCCCACATAAACAGACAGAAGACAAAGGAGTTCAGTGTGAAGAAGAGGAAGAAGAAAAGAAAGACAGTGGTGTAGCTTCAACAGAAGATAGTTCCTCATCACATATAACTGCAGCAGCTCTTGCTGCAAAG…	MALAMLMGSLNVTPLGMLSRPVCGIRGKTLIINLPGSKKGSQECFQFILPALPHAIDLLRDAIVKVKEVHDELEDLPSPPPPLSPPPTTSPHKQTEDKGVQCEEEEEEKKDSGVASTEDSSSSHITAAALAAKIPDSIISRGVQVLPRDTASLSTTPSESPRAQATSRLSTASCPTPKVTVL	lcl|GPHN_151:108-656_ORF2_GPHN_151:107:655	['GPHN_151_ORF2']
GPHN_152	ORF1	682	73.88	GPHN	E40	ATGGCGACCGAGGGA	ATGGCGACCGAGGGAATGATCCTCACCAACCACGACCATCAAATCCGTGTCGGAGTCCTCACAGTGAGTGATAGCTGCTTCAGGAATCTTGCAGAAGACCGCAGTGGGATAAATCTAAAAGATCTTGTCCAAGATCCTTCTTTGTTGGGTGGGACTATATCGGCATACAAGATAGTACCAGATGAAATAGAAGAAATCAAGGAAACACTCATAGACTGGTGTGATGAAAAGGAACTTAATTTAATATTAACAACTGGAGGAACGGGGTTTGCACCACGAGATGTCACTCCAGAGGCCACAAAAGAAGTAATAGAGCGGGAAGCGCCAGGGATGGCCCTGGCAATGCTGATGGGATCGCTCAATGTCACACCTCTGGGCATGCTCTCTAGACCAGTGTGT…	MATEGMILTNHDHQIRVGVLTVSDSCFRNLAEDRSGINLKDLVQDPSLLGGTISAYKIVPDEIEEIKETLIDWCDEKELNLILTTGGTGFAPRDVTPEATKEVIEREAPGMALAMLMGSLNVTPLGMLSRPVCGIRGKTLIINLPGSKKGSQECFQFILPALPHAIDLLRDAIVKVKEVHDELEDLPSPPPPLSPPPTTSPHKQTEDKGVQCEEEEEEKKDSGVASTEDSSSSHITAAALAAKIPDSIISRGVQVLPRDTASLSTTPSESPRAQATSRLSTASCPTPKVQSRCSSKENILRASHSAVDITKVARRHRMSPFPLTSMDKAFITVLEMTPVLGTEIINYRDGMGRVLAQDVYAKDNLPPFPASVKDGYAVRAADGPGDRFIIGESQAGEQP…	lcl|GPHN_152:8-2056_ORF1_GPHN_152:7:2055	['GPHN_152_ORF1']
GPHN_153	ORF1	610	66.13	GPHN	E40	TTGGGTGGGACTATA	TTGGGTGGGACTATATCGGCATACAAGATAGTACCAGATGAAATAGAAGAAATCAAGGAAACACTCATAGACTGGTGTGATGAAAAGGAACTTAATTTAATATTAACAACTGGAGGAACGGGGTTTGCACCACGAGATGTCACTCCAGAGAAATTCCCAACATTCCCATTTTGTGGGCTCCAGAAAGGGGCCACAAAAGAAGTAATAGAGCGGGAAGCGCCAGGGATGGCCCTGGCAATGCTGATGGGATCGCTCAATGTCACACCTCTGGGCATGCTCTCTAGACCAGTGTGTGGAATAAGGGGGAAAACTCTGATAATTAACCTACCTGGTAGCAAGAAAGGATCTCAGATTCCAGACTCCATCATTTCTCGTGGTGTTCAGGTGCTCCCACGAGAC…	MGGTISAYKIVPDEIEEIKETLIDWCDEKELNLILTTGGTGFAPRDVTPEKFPTFPFCGLQKGATKEVIEREAPGMALAMLMGSLNVTPLGMLSRPVCGIRGKTLIINLPGSKKGSQIPDSIISRGVQVLPRDTASLSTTPSESPRAQATSRLSTASCPTPKVQSRCSSKENILRASHSAVDITKVARRHRMSPFPLTSMDKAFITVLEMTPVLGTEIINYRDGMGRVLAQDVYAKDNLPPFPASVKDGYAVRAADGPGDRFIIGESQAGEQPTQTVMPGQVMRVTTGAPIPCGADAVVQVEDTELIRESDDGTEELEVRILVQARPGQDIRPIGHDIKRGECVLAKGTHMGPSEIGLLATVGVTEVEVNKFPVVAVMSTGNELLNPEDDLLPGKIRDS…	lcl|GPHN_153:73-1905_ORF1_GPHN_153:72:1904	['GPHN_153_ORF1']
GPHN_154	ORF1	709	76.56	GPHN	E40	ATGGCGACCGAGGGA	ATGGCGACCGAGGGAATGATCCTCACCAACCACGACCATCAAATCCGTGTCGGAGTCCTCACAGTGAGTGATAGCTGCTTCAGGAATCTTGCAGAAGACCGCAGTGGGATAAATCTAAAAGATCTTGTCCAAGATCCTTCTTTGTTGGGTGGGACTATATCGGCATACAAGATAGTACCAGATGAAATAGAAGAAATCAAGGAAACACTCATAGACTGGTGTGATGAAAAGGAACTTAATTTAATATTAACAACTGGAGGAACGGGGTTTGCACCACGAGATGTCACTCCAGAGAAATTCCCAACATTCCCATTTTGTGGGCTCCAGAAAGGGGCCACAAAAGAAGTAATAGAGCGGGAAGCGCCAGGGATGGCCCTGGCAATGCTGATGGGATCGCTC…	MATEGMILTNHDHQIRVGVLTVSDSCFRNLAEDRSGINLKDLVQDPSLLGGTISAYKIVPDEIEEIKETLIDWCDEKELNLILTTGGTGFAPRDVTPEKFPTFPFCGLQKGATKEVIEREAPGMALAMLMGSLNVTPLGMLSRPVCGIRGKTLIINLPGSKKGSQECFQFILPALPHAIDLLRDAIVKVKEVHDELEDLPSPPPPLSPPPTTSPHKQTEDKGVQCEEEEEEKKDSGVASTEDSSSSHITAAALAAKIPDSIISRGVQVLPRDTASLSTTPSESPRAQATSRLSTASCPTPKQIRRPDESKGVASRVGSLKYLLSLGDFVHKTFKVQSRCSSKENILRASHSAVDITKVARRHRMSPFPLTSMDKAFITVLEMTPVLGTEIINYRDGMGR…	lcl|GPHN_154:8-2137_ORF1_GPHN_154:7:2136	['GPHN_154_ORF1']
GPHN_155	ORF1	289	31.66	GPHN	E40	CTGGTGCAAGCTCGG	CTGGTGCAAGCTCGGCCAGGCCAAGATATCCGACCCATCGGCCATGACATTAAGAGAGGGGAGTGTGTTTTGGCCAAAGGAACCCATATGGGCCCTTCAGAGATTGGTCTCCTTGCAACTGTGGGTGTCACAGAAGTGGAAGTTAATAAGTTTCCAGTGGTTGCCGTTATGTCAACAGGGAATGAGCTGCTAAATCCTGAAGATGATCTCTTACCAGGAAAGATTCGGGACAGCAATCGATCAACACTTCTAGCAACAATTCAGGAACATGGTTACCCAACAATCAACCTGGGAATTGTAGGAGACAACCCAGATGACTTACTCAATGCCTTGAATGAGGGTATCAGCCGTGCTGATGTCATCATCACGTCAGGAGGTGTGTCCATGGGGGAAAAGGAC…	MVQARPGQDIRPIGHDIKRGECVLAKGTHMGPSEIGLLATVGVTEVEVNKFPVVAVMSTGNELLNPEDDLLPGKIRDSNRSTLLATIQEHGYPTINLGIVGDNPDDLLNALNEGISRADVIITSGGVSMGEKDYLKQVLDIDLHAQIHFGRVFMKPGLPTTFATLDIDGVRKIIFALPGNPVSAVVTCNLFVVPALRKMQGILDPRPTIIKARLSCDVKLDPRPEYHRCILTWHHQEPLPWAQSTGNQMSSRLMSMRSANGLLMLPPKTEQYVELHKGEVVDVMVIGRL	lcl|GPHN_155:574-1443_ORF1_GPHN_155:573:1442	['GPHN_155_ORF1', 'GPHN_199_ORF1']
	ORF2	165	17.86	GPHN	PTC	ATGGCGACCGAGGGA	ATGGCGACCGAGGGAATGATCCTCACCAACCACGACCATCAAATCCGTGTCGGAGTCCTCACAGTGAGTGATAGCTGCTTCAGGAATCTTGCAGAAGACCGCAGTGGGATAAATCTAAAAGATCTTGTCCAAGATCCTTCTTTGTTGGGTGGGACTATATCGGCATACAAGATAGTACCAGATGAAATAGAAGAAATCAAGGAAACACTCATAGACTGGTGTGATGAAAAGGAACTTAATTTAATATTAACAACTGGAGGAACGGGGTTTGCACCACGAGATGTCACTCCAGAGAAATTCCCAACATTCCCATTTTGTGGGCTCCAGAAAGGGGCCACAAAAGAAGTAATAGAGCGGGAAGCGCCAGGGATGGCCCTGGCAATGCTGATGGGATCGCTC…	MATEGMILTNHDHQIRVGVLTVSDSCFRNLAEDRSGINLKDLVQDPSLLGGTISAYKIVPDEIEEIKETLIDWCDEKELNLILTTGGTGFAPRDVTPEKFPTFPFCGLQKGATKEVIEREAPGMALAMLMGSLNVTPLGMLSRPVCGIRGKTLIINLPGSKKGSQ	lcl|GPHN_155:8-505_ORF2_GPHN_155:7:504	['GPHN_155_ORF2']
GPHN_156	ORF1	654	70.92	GPHN	E40	ATGGCGACCGAGGGA	ATGGCGACCGAGGGAATGATCCTCACCAACCACGACCATCAAATCCGTGTCGGAGTCCTCACAGTGAGTGATAGCTGCTTCAGGAATCTTGCAGAAGACCGCAGTGGGATAAATCTAAAAGATCTTGTCCAAGATCCTTCTTTACCAGTGTGTGGAATAAGGGGGAAAACTCTGATAATTAACCTACCTGGTAGCAAGAAAGGATCTCAGGAATGCTTTCAGTTCATACTGCCAGCTCTACCTCATGCCATTGACCTTTTACGTGATGCCATTGTAAAAGTAAAGGAGGTGCATGATGAACTTGAAGATTTACCTTCCCCACCACCTCCTCTCTCTCCACCTCCTACAACTAGCCCACATAAACAGACAGAAGACAAAGGAGTTCAGTGTGAAGAAGAG…	MATEGMILTNHDHQIRVGVLTVSDSCFRNLAEDRSGINLKDLVQDPSLPVCGIRGKTLIINLPGSKKGSQECFQFILPALPHAIDLLRDAIVKVKEVHDELEDLPSPPPPLSPPPTTSPHKQTEDKGVQCEEEEEEKKDSGVASTEDSSSSHITAAALAAKIPDSIISRGVQVLPRDTASLSTTPSESPRAQATSRLSTASCPTPKVQSRCSSKENILRASHSAVDITKVARRHRMSPFPLTSMDKAFITVLEMTPVLGTEIINYRDGMGRVLAQDVYAKDNLPPFPASVKDGYAVRAADGPGDRFIIGESQAGEQPTQTVMPGQVMRVTTGAPIPCGADAVVQVEDTELIRESDDGTEELEVRILVQARPGQDIRPIGHDIKRGECVLAKGTHMGPSE…	lcl|GPHN_156:8-1972_ORF1_GPHN_156:7:1971	['GPHN_156_ORF1']
GPHN_157	ORF1	674	72.6	GPHN	PTC	ATGGCGACCGAGGGA	ATGGCGACCGAGGGAATGATCCTCACCAACCACGACCATCAAATCCGTGTCGGAGTCCTCACAGTGAGTGATAGCTGCTTCAGGAATCTTGCAGAAGACCGCAGTGGGATAAATCTAAAAGATCTTGTCCAAGATCCTTCTTTGTTGGGTGGGACTATATCGGCATACAAGATAGTACCAGATGAAATAGAAGAAATCAAGGAAACACTCATAGACTGGTGTGATGAAAAGGAACTTAATTTAATATTAACAACTGGAGGAACGGGGTTTGCACCACGAGATGTCACTCCAGAGGCCACAAAAGAAGTAATAGAGCGGGAAGCGCCAGGGATGGCCCTGGCAATGCTGATGGGATCGCTCAATGTCACACCTCTGGGCATGCTCTCTAGACCAGTGTGT…	MATEGMILTNHDHQIRVGVLTVSDSCFRNLAEDRSGINLKDLVQDPSLLGGTISAYKIVPDEIEEIKETLIDWCDEKELNLILTTGGTGFAPRDVTPEATKEVIEREAPGMALAMLMGSLNVTPLGMLSRPVCGIRGKTLIINLPGSKKGSQECFQFILPALPHAIDLLRDAIVKVKEVHDELEDLPSPPPPLSPPPTTSPHKQTEDKGVQCEEEEEEKKDSGVASTEDSSSSHITAAALAAKIPDSIISRGVQVLPRDTASLSTTPSESPRAQATSRLSTASCPTPKQIRRPDESKGVASRVGSLKYLLSLGDFVHKTFKVQSRCSSKENILRASHSAVDITKVARRHRMSPFPLTSMDKAFITVLEMTPVLGTEIINYRDGMGRVLAQDVYAKDNLP…	lcl|GPHN_157:8-2032_ORF1_GPHN_157:7:2031	['GPHN_157_ORF1']
GPHN_158	ORF1	608	65.53	GPHN	PTC	ATGGCGACCGAGGGA	ATGGCGACCGAGGGAATGATCCTCACCAACCACGACCATCAAATCCGTGTCGGAGTCCTCACAGTGAGTGATAGCTGCTTCAGGAATCTTGCAGAAGACCGCAGTGGGATAAATCTAAAAGATCTTGTCCAAGATCCTTCTTTGTTGGGTGGGACTATATCGGCATACAAGATAGTACCAGATGAAATAGAAGAAATCAAGGAAACACTCATAGACTGGTGTGATGAAAAGGAACTTAATTTAATATTAACAACTGGAGGAACGGGGTTTGCACCACGAGATGTCACTCCAGAGGCCACAAAAGAAGTAATAGAGCGGGAAGCGCCAGGGATGGCCCTGGCAATGCTGATGGGATCGCTCAATGTCACACCTCTGGGCATGCTCTCTAGACCAGTGTGT…	MATEGMILTNHDHQIRVGVLTVSDSCFRNLAEDRSGINLKDLVQDPSLLGGTISAYKIVPDEIEEIKETLIDWCDEKELNLILTTGGTGFAPRDVTPEATKEVIEREAPGMALAMLMGSLNVTPLGMLSRPVCGIRGKTLIINLPGSKKGSQECFQFILPALPHAIDLLRDAIVKVKEVHDELEDLPSPPPPLSPPPTTSPHKQTEDKGVQCEEEEEEKKDSGVASTEDSSSSHITAAALAAKIPDSIISRGVQVLPRDTASLSTTPSESPRAQATSRLSTASCPTPKVQSRCSSKENILRASHSAVDITKVARRHRMSPFPLTSMDKAFITVLEMTPVLGTEIINYRDGMGRVLAQDVYAKDNLPPFPASVKDGYAVRAADGPGDRFIIGESQAGEQP…	lcl|GPHN_158:8-1834_ORF1_GPHN_158:7:1833	['GPHN_158_ORF1']
GPHN_159	ORF1	511	54.9	GPHN	PTC	ATGGCGACCGAGGGA	ATGGCGACCGAGGGAATGATCCTCACCAACCACGACCATCAAATCCGTGTCGGAGTCCTCACAGTGAGTGATAGCTGCTTCAGGAATCTTGCAGAAGACCGCAGTGGGATAAATCTAAAAGATCTTGTCCAAGATCCTTCTTTGTTGGGTGGGACTATATCGGCATACAAGATAGTACCAGATGAAATAGAAGAAATCAAGGAAACACTCATAGACTGGTGTGATGAAAAGGAACTTAATTTAATATTAACAACTGGAGGAACGGGGTTTGCACCACGAGATGTCACTCCAGAGGCCACAAAAGAAGTAATAGAGCGGGAAGCGCCAGGGATGGCCCTGGCAATGCTGATGGGATCGCTCAATGTCACACCTCTGGGCATGCTCTCTAGACCAGTGTGT…	MATEGMILTNHDHQIRVGVLTVSDSCFRNLAEDRSGINLKDLVQDPSLLGGTISAYKIVPDEIEEIKETLIDWCDEKELNLILTTGGTGFAPRDVTPEATKEVIEREAPGMALAMLMGSLNVTPLGMLSRPVCGIRGKTLIINLPGSKKGSQECFQFILPALPHAIDLLRDAIVKVKEVHDELEDLPSPPPPLSPPPTTSPHKQTEDKGVQCEEEEEEKKDSGVASTEDSSSSHITAAALAAKIPDSIISRGVQVLPRDTASLSTTPSESPRAQATSRLSTASCPTPKVQSRCSSKENILRASHSAVDITKVARRHRMSPFPLTSMDKAFITVLEMTPVLGTEIINYRDGMGRVLAQDVYAKDNLPPFPASVKDGYAVRAADGPGDRFIIGESQAGEQP…	lcl|GPHN_159:8-1543_ORF1_GPHN_159:7:1542	['GPHN_159_ORF1']
	ORF2	269	30.39	GPHN	E40	TTGAAGATACTGAAC	TTGAAGATACTGAACTCATCAGGGAATCAGATGATGGTACTGAAGAACTTGAAGTACGAATTCTGGTGCAAGCTCGGCCAGGCCAAGATATCCGACCCATCGGCCATGACATTAAGAGAGGGGAGTGTGTTTTGGCCAAAGGAACCCATATGGGCCCTTCAGAGATTGGTCTCCTTGCAACTGTGGGTGTCACAGAAGTGGAAGTTAATAAGTTTCCAGTGGTTGCCGTTATGTCAACAGGGAATGAGCCCAGATGACTTACTCAATGCCTTGAATGAGGGTATCAGCCGTGCTGATGTCATCATCACGTCAGGAGGTGTGTCCATGGGGGAAAAGGACTATCTCAAGCAGGTGCTGGACATTGATCTTCATGCTCAGATCCATTTTGGCAGAGTTTTT…	MKILNSSGNQMMVLKNLKYEFWCKLGQAKISDPSAMTLREGSVFWPKEPIWALQRLVSLQLWVSQKWKLISFQWLPLCQQGMSPDDLLNALNEGISRADVIITSGGVSMGEKDYLKQVLDIDLHAQIHFGRVFMKPGLPTTFATLDIDGVRKIIFALPGNPVSAVVTCNLFVVPALRKMQGILDPRPTIIKARLSCDVKLDPRPEYHRCILTWHHQEPLPWAQSTGNQMSSRLMSMRSANGLLMLPPKTEQYVELHKGEVVDVMVIGRL	lcl|GPHN_159:1287-2096_ORF2_GPHN_159:1286:2095	['GPHN_159_ORF2']
GPHN_160	ORF1	544	59.01	GPHN	E40	CTGGTAGCAAGAAAG	CTGGTAGCAAGAAAGGATCTCAGCCCACATAAACAGACAGAAGACAAAGGAGTTCAGTGTGAAGAAGAGGAAGAAGAAAAGAAAGACAGTGGTGTAGCTTCAACAGAAGATAGTTCCTCATCACATATAACTGCAGCAGCTCTTGCTGCAAAGATTCCAGACTCCATCATTTCTCGTGGTGTTCAGGTGCTCCCACGAGACACAGCCTCCCTTAGCACTACTCCTTCAGAATCGCCCCGTGCTCAGGCTACATCTCGCCTCTCTACAGCTTCTTGTCCAACACCAAAAGTCCAGTCCAGGTGCAGCAGCAAGGAGAACATTCTAAGAGCCAGTCACAGTGCTGTAGATATCACCAAGGTGGCTAGAAGACATCGCATGTCTCCTTTTCCCCTGACGTCT…	MVARKDLSPHKQTEDKGVQCEEEEEEKKDSGVASTEDSSSSHITAAALAAKIPDSIISRGVQVLPRDTASLSTTPSESPRAQATSRLSTASCPTPKVQSRCSSKENILRASHSAVDITKVARRHRMSPFPLTSMDKAFITVLEMTPVLGTEIINYRDGMGRVLAQDVYAKDNLPPFPASVKDGYAVRAADGPGDRFIIGESQAGEQPTQTVMPGQVMRVTTGAPIPCGADAVVQVEDTELIRESDDGTEELEVRILVQARPGQDIRPIGHDIKRGECVLAKGTHMGPSEIGLLATVGVTEVEVNKFPVVAVMSTGNELLNPEDDLLPGKIRDSNRSTLLATIQEHGYPTINLGIVGDNPDDLLNALNEGISRADVIITSGGVSMGEKDYLKQVLDIDLH…	lcl|GPHN_160:346-1980_ORF1_GPHN_160:345:1979	['GPHN_160_ORF1', 'GPHN_166_ORF1', 'GPHN_183_ORF2', 'GPHN_196_ORF2', 'GPHN_261_ORF2', 'GPHN_55_ORF2']
	ORF2	110	12.12	GPHN	PTC	ATGGCGACCGAGGGA	ATGGCGACCGAGGGAATGATCCTCACCAACCACGACCATCAAATCCGTGTCGGAGTCCTCACAGTGAGTGATAGCTGCTTCAGGAATCTTGCAGAAGACCGCAGTGGGATAAATCTAAAAGATCTTGTCCAAGATCCTTCTTTGTTGGGTGGGACTATATCGGCATACAAGATAGTACCAGATGAAATAGAAGAAATCAAGGAAACACTCATAGACTGGTGTGATGAAAAGGAACTTAATTTAATATTAACAACTGGAGGAACGGGGTTTGCACCACGAGATGTCACTCCAGAGACCAGTGTGTGGAATAAGGGGGAAAACTCTGATAATTAA	MATEGMILTNHDHQIRVGVLTVSDSCFRNLAEDRSGINLKDLVQDPSLLGGTISAYKIVPDEIEEIKETLIDWCDEKELNLILTTGGTGFAPRDVTPETSVWNKGENSDN	lcl|GPHN_160:8-340_ORF2_GPHN_160:7:339	['GPHN_160_ORF2', 'GPHN_164_ORF2', 'GPHN_174_ORF1', 'GPHN_192_ORF1', 'GPHN_62_ORF1']
GPHN_161	ORF1	382	41.24	GPHN	E40	ATGGCGACCGAGGGA	ATGGCGACCGAGGGAATGATCCTCACCAACCACGACCATCAAATCCGTGTCGGAGTCCTCACAGGTCACAGTGCTGTAGATATCACCAAGGTGGCTAGAAGACATCGCATGTCTCCTTTTCCCCTGACGTCTATGGACAAAGCCTTCATTACAGTCCTGGAGATGACTCCGGTGCTTGGTACAGAAATCATCAATTACCGAGATGGAATGGGGCGAGTCCTTGCTCAAGATGTATATGCAAAAGACAACCTACCCCCATTCCCTGCATCAGTAAAAGATGGCTATGCTGTTCGAGCTGCTGATGGTCCAGGGGATCGTTTCATCATTGGGGAATCCCAAGCTGGTGAGCAGCCAACTCAGACAGTAATGCCAGGACAAGTGATGCGGGTTACAACAGGT…	MATEGMILTNHDHQIRVGVLTGHSAVDITKVARRHRMSPFPLTSMDKAFITVLEMTPVLGTEIINYRDGMGRVLAQDVYAKDNLPPFPASVKDGYAVRAADGPGDRFIIGESQAGEQPTQTVMPGQVMRVTTGAPIPCGADAVVQVEDTELIRESDDGTEELEVRILVQARPGQDIRPIGHDIKRGECVLAKGTHMGPSEIGLLATVGVTEVEVNKFPVVAVMSTGNELLNPEDDLLPGKIRDSNRSTLLATIQEHGYPTINLGIVGDNPDDLLNALNEGISRADVIITSGGVSMGEKDYLKQVLDIDLHAQIHFGRVFMKPGLPTTFATLDIDGVRKIIFALPGNPVSAVVTCNLFVVPALRKMQGILDPRPTIIKARVIR	lcl|GPHN_161:8-1156_ORF1_GPHN_161:7:1155	['GPHN_161_ORF1']
GPHN_162	ORF1	771	83.79	GPHN	E40	ATGGCGACCGAGGGA	ATGGCGACCGAGGGAATGATCCTCACCAACCACGACCATCAAATCCGTGTCGGAGTCCTCACAGTGAGTGATAGCTGCTTCAGGAATCTTGCAGAAGACCGCAGTGGGATAAATCTAAAAGATCTTGTCCAAGATCCTTCTTTGTTGGGTGGGACTATATCGGCATACAAGATAGTACCAGATGAAATAGAAGAAATCAAGGAAACACTCATAGACTGGTGTGATGAAAAGGAACTTAATTTAATATTAACAACTGGAGGAACGGGGTTTGCACCACGAGATGTCACTCCAGAGAAATTCCCAACATTCCCATTTTGTGGGCTCCAGAAAGGGGCCACAAAAGAAGTAATAGAGCGGGAAGCGCCAGGGATGGCCCTGGCAATGCTGATGGGATCGCTC…	MATEGMILTNHDHQIRVGVLTVSDSCFRNLAEDRSGINLKDLVQDPSLLGGTISAYKIVPDEIEEIKETLIDWCDEKELNLILTTGGTGFAPRDVTPEKFPTFPFCGLQKGATKEVIEREAPGMALAMLMGSLNVTPLGMLSRPVCGIRGKTLIINLPGSKKGSQECFQFILPALPHAIDLLRDAIVKVKEVHDELEDLPSPPPPLSPPPTTSPHKQTEDKGVQCEEEEEEKKDSGVASTEDSSSSHITAAALAAKIPDSIISRGVQVLPRDTASLSTTPSESPRAQATSRLSTASCPTPKQIRRPDESKGVASRVGSLKYLLSLGDFVHKTFKARLPSCSSTYSVSELHSRLEGLKDELWRNRGYDLRVQSRCSSKENILRANGMGRVLAQDVYAKDN…	lcl|GPHN_162:8-2323_ORF1_GPHN_162:7:2322	['GPHN_162_ORF1']
	ORF2	119	13.9	unknown	PTC	CTGCAGCAGCTCTTG	CTGCAGCAGCTCTTGCTGCAAAGATTCCAGACTCCATCATTTCTCGTGGTGTTCAGGTGCTCCCACGAGACACAGCCTCCCTTAGCACTACTCCTTCAGAATCGCCCCGTGCTCAGGCTACATCTCGCCTCTCTACAGCTTCTTGTCCAACACCAAAACAAATTAGACGGCCGGATGAAAGCAAAGGAGTTGCTAGTAGAGTTGGATCCCTCAAATATCTATTATCACTGGGAGATTTTGTACATAAAACATTTAAGGCTCGGCTTCCGTCGTGCTCATCTACCTATAGTGTATCTGAGCTCCACTCTAGATTGGAAGGGCTTAAAGATGAACTCTGGAGGAATAGAGGCTACGACTTAA	MQQLLLQRFQTPSFLVVFRCSHETQPPLALLLQNRPVLRLHLASLQLLVQHQNKLDGRMKAKELLVELDPSNIYYHWEILYIKHLRLGFRRAHLPIVYLSSTLDWKGLKMNSGGIEATT	lcl|GPHN_162:753-1112_ORF2_GPHN_162:752:1111	['GPHN_162_ORF2', 'GPHN_58_ORF2', 'GPHN_98_ORF2']
GPHN_163	ORF1	702	76.05	GPHN	E40	TTGTTGGGTGGGACT	TTGTTGGGTGGGACTATATCGGCATACAAGATAGTACCAGATGAAATAGAAGAAATCAAGGAAACACTCATAGACTGGTGTGATGAAAAGGAACTTAATTTAATATTAACAACTGGAGGAACGGGGTTTGCACCACGAGATGTCACTCCAGAGAAATTCCCAACATTCCCATTTTGTGGGCTCCAGAAAGGGGCCACAAAAGAAGTAATAGAGCGGGAAGCGCCAGGGATGGCCCTGGCAATGCTGATGGGATCGCTCAATGTCACACCTCTGGGCATGCTCTCTAGACCAGTGTGTGGAATAAGGGGGAAAACTCTGATAATTAACCTACCTGGTAGCAAGAAAGGATCTCAGGAATGCTTTCAGTTCATACTGCCAGCTCTACCTCATGCCATTGAC…	MLGGTISAYKIVPDEIEEIKETLIDWCDEKELNLILTTGGTGFAPRDVTPEKFPTFPFCGLQKGATKEVIEREAPGMALAMLMGSLNVTPLGMLSRPVCGIRGKTLIINLPGSKKGSQECFQFILPALPHAIDLLRDAIVKVKEVHDELEDLPSPPPPLSPPPTTSPHKQTEDKGVQCEEEEEEKKDSGVASTEDSSSSHITAAALAAKIPDSIISRGVQVLPRDTASLSTTPSESPRAQATSRLSTASCPTPKVQSRCSSKENILRASHSAVDITKVARRHRMSPFPLTSMDKAFITVLEMTPVLGTEIINYRDGMGRVLAQDVYAKDNLPPFPASVKDGYAVRAADGPGDRFIIGESQAGEQPTQTVMPGQVMRVTTGAPIPCGADAVVQVEDTELI…	lcl|GPHN_163:225-2333_ORF1_GPHN_163:224:2332	['GPHN_163_ORF1']
GPHN_164	ORF1	100	11.18	unknown	PTC	CTGCAGCAGCTCTTG	CTGCAGCAGCTCTTGCTGCAAAGAAGCATCCATTCTACACCAGTCCTGCTCTTTTCATGGCAAATCATGGGCAGCCCATCCCTGGTCTCATCAGTTATTCCCATCATGCAACAGGCAGTGCAGATAAACGGATTCCAGACTCCATCATTTCTCGTGGTGTTCAGGTGCTCCCACGAGACACAGCCTCCCTTAGCACTACTCCTTCAGAATCGCCCCGTGCTCAGGCTACATCTCGCCTCTCTACAGCTTCTTGTCCAACACCAAAAGTCCAGTCCAGGTGCAGCAGCAAGGAGAACATTCTAA	MQQLLLQRSIHSTPVLLFSWQIMGSPSLVSSVIPIMQQAVQINGFQTPSFLVVFRCSHETQPPLALLLQNRPVLRLHLASLQLLVQHQKSSPGAAARRTF	lcl|GPHN_164:619-921_ORF1_GPHN_164:618:920	['GPHN_105_ORF2', 'GPHN_116_ORF1', 'GPHN_119_ORF1', 'GPHN_143_ORF2', 'GPHN_144_ORF2', 'GPHN_164_ORF1', 'GPHN_171_ORF2', 'GPHN_185_ORF2', 'GPHN_190_ORF2', 'GPHN_241_ORF2', 'GPHN_254_ORF2', 'GPHN_38_ORF2', 'GPHN_4_ORF2', 'GPHN_51_ORF2', 'GPHN_57_ORF2', 'GPHN_77_ORF2', 'GPHN_95_ORF1']
	ORF2	110	12.12	GPHN	PTC	ATGGCGACCGAGGGA	ATGGCGACCGAGGGAATGATCCTCACCAACCACGACCATCAAATCCGTGTCGGAGTCCTCACAGTGAGTGATAGCTGCTTCAGGAATCTTGCAGAAGACCGCAGTGGGATAAATCTAAAAGATCTTGTCCAAGATCCTTCTTTGTTGGGTGGGACTATATCGGCATACAAGATAGTACCAGATGAAATAGAAGAAATCAAGGAAACACTCATAGACTGGTGTGATGAAAAGGAACTTAATTTAATATTAACAACTGGAGGAACGGGGTTTGCACCACGAGATGTCACTCCAGAGACCAGTGTGTGGAATAAGGGGGAAAACTCTGATAATTAA	MATEGMILTNHDHQIRVGVLTVSDSCFRNLAEDRSGINLKDLVQDPSLLGGTISAYKIVPDEIEEIKETLIDWCDEKELNLILTTGGTGFAPRDVTPETSVWNKGENSDN	lcl|GPHN_164:8-340_ORF2_GPHN_164:7:339	['GPHN_160_ORF2', 'GPHN_164_ORF2', 'GPHN_174_ORF1', 'GPHN_192_ORF1', 'GPHN_62_ORF1']
	ORF3	656	71.27	GPHN	E40	CTGGAGGAACGGGGT	CTGGAGGAACGGGGTTTGCACCACGAGATGTCACTCCAGAGACCAGTGTGTGGAATAAGGGGGAAAACTCTGATAATTAACCTACCTGGTAGCAAGAAAGGATCTCAGGAATGCTTTCAGTTCATACTGCCAGCTCTACCTCATGCCATTGACCTTTTACGTGATGCCATTGTAAAAGTAAAGGAGGTGCATGATGAACTTGAAGATTTACCTTCCCCACCACCTCCTCTCTCTCCACCTCCTACAACTAGCCCACATAAACAGACAGAAGACAAAGGAGTTCAGTGTGAAGAAGAGGAAGAAGAAAAGAAAGACAGTGGTGTAGCTTCAACAGAAGATAGTTCCTCATCACATATAACTGCAGCAGCTCTTGCTGCAAAGAAGCATCCATTCTACACC…	MEERGLHHEMSLQRPVCGIRGKTLIINLPGSKKGSQECFQFILPALPHAIDLLRDAIVKVKEVHDELEDLPSPPPPLSPPPTTSPHKQTEDKGVQCEEEEEEKKDSGVASTEDSSSSHITAAALAAKKHPFYTSPALFMANHGQPIPGLISYSHHATGSADKRIPDSIISRGVQVLPRDTASLSTTPSESPRAQATSRLSTASCPTPKVQSRCSSKENILRASHSAVDITKVARRHRMSPFPLTSMDKAFITVLEMTPVLGTEIINYRDGMGRVLAQDVYAKDNLPPFPASVKDGYAVRAADGPGDRFIIGESQAGEQPTQTVMPGQVMRVTTGAPIPCGADAVVQVEDTELIRESDDGTEELEVRILVQARPGQDIRPIGHDIKRGECVLAKGTHMGP…	lcl|GPHN_164:261-2231_ORF3_GPHN_164:260:2230	['GPHN_164_ORF3']
GPHN_165	ORF1	591	64.09	GPHN	PTC	ATGGCGACCGAGGGA	ATGGCGACCGAGGGAATGATCCTCACCAACCACGACCATCAAATCCGTGTCGGAGTCCTCACAGTGAGTGATAGCTGCTTCAGGAATCTTGCAGAAGACCGCAGTGGGATAAATCTAAAAGATCTTGTCCAAGATCCTTCTTTGTTGGGTGGGACTATATCGGCATACAAGATAGTACCAGATGAAATAGAAGAAATCAAGGAAACACTCATAGACTGGTGTGATGAAAAGGAACTTAATTTAATATTAACAACTGGAGGAACGGGGTTTGCACCACGAGATGTCACTCCAGAGGCCACAAAAGAAGTAATAGAGCGGGAAGCGCCAGGGATGGCCCTGGCAATGCTGATGGGATCGCTCAATGTCACACCTCTGGGCATGCTCTCTAGACCAGTGTGT…	MATEGMILTNHDHQIRVGVLTVSDSCFRNLAEDRSGINLKDLVQDPSLLGGTISAYKIVPDEIEEIKETLIDWCDEKELNLILTTGGTGFAPRDVTPEATKEVIEREAPGMALAMLMGSLNVTPLGMLSRPVCGIRGKTLIINLPGSKKGSQIPDSIISRGVQVLPRDTASLSTTPSESPRAQATSRLSTASCPTPKQIRRPDESKGVASRVGSLKYLLSLGDFVHKTFKLHSRLEGLKDELWRNRGYDLRVQSRCSSKENILRASHSAVDITKVARRHRMSPFPLTSMDKAFITVLEMTPVLGTEIINYRDGMGRVLAQDVYAKDNLPPFPASVKDGYAVRAADGPGDRFIIGESQAGEQPTQTVMPGQVMRVTTGAPIPCGADAVVQVEDTELIRES…	lcl|GPHN_165:8-1783_ORF1_GPHN_165:7:1782	['GPHN_165_ORF1']
	ORF2	105	12.17	unknown	PTC	CTGGTAGCAAGAAAG	CTGGTAGCAAGAAAGGATCTCAGATTCCAGACTCCATCATTTCTCGTGGTGTTCAGGTGCTCCCACGAGACACAGCCTCCCTTAGCACTACTCCTTCAGAATCGCCCCGTGCTCAGGCTACATCTCGCCTCTCTACAGCTTCTTGTCCAACACCAAAACAAATTAGACGGCCGGATGAAAGCAAAGGAGTTGCTAGTAGAGTTGGATCCCTCAAATATCTATTATCACTGGGAGATTTTGTACATAAAACATTTAAGCTCCACTCTAGATTGGAAGGGCTTAAAGATGAACTCTGGAGGAATAGAGGCTACGACTTAA	MVARKDLRFQTPSFLVVFRCSHETQPPLALLLQNRPVLRLHLASLQLLVQHQNKLDGRMKAKELLVELDPSNIYYHWEILYIKHLSSTLDWKGLKMNSGGIEATT	lcl|GPHN_165:441-758_ORF2_GPHN_165:440:757	['GPHN_141_ORF2', 'GPHN_165_ORF2', 'GPHN_237_ORF2', 'GPHN_26_ORF2', 'GPHN_272_ORF2']
GPHN_166	ORF1	544	59.01	GPHN	E40	CTGGTAGCAAGAAAG	CTGGTAGCAAGAAAGGATCTCAGCCCACATAAACAGACAGAAGACAAAGGAGTTCAGTGTGAAGAAGAGGAAGAAGAAAAGAAAGACAGTGGTGTAGCTTCAACAGAAGATAGTTCCTCATCACATATAACTGCAGCAGCTCTTGCTGCAAAGATTCCAGACTCCATCATTTCTCGTGGTGTTCAGGTGCTCCCACGAGACACAGCCTCCCTTAGCACTACTCCTTCAGAATCGCCCCGTGCTCAGGCTACATCTCGCCTCTCTACAGCTTCTTGTCCAACACCAAAAGTCCAGTCCAGGTGCAGCAGCAAGGAGAACATTCTAAGAGCCAGTCACAGTGCTGTAGATATCACCAAGGTGGCTAGAAGACATCGCATGTCTCCTTTTCCCCTGACGTCT…	MVARKDLSPHKQTEDKGVQCEEEEEEKKDSGVASTEDSSSSHITAAALAAKIPDSIISRGVQVLPRDTASLSTTPSESPRAQATSRLSTASCPTPKVQSRCSSKENILRASHSAVDITKVARRHRMSPFPLTSMDKAFITVLEMTPVLGTEIINYRDGMGRVLAQDVYAKDNLPPFPASVKDGYAVRAADGPGDRFIIGESQAGEQPTQTVMPGQVMRVTTGAPIPCGADAVVQVEDTELIRESDDGTEELEVRILVQARPGQDIRPIGHDIKRGECVLAKGTHMGPSEIGLLATVGVTEVEVNKFPVVAVMSTGNELLNPEDDLLPGKIRDSNRSTLLATIQEHGYPTINLGIVGDNPDDLLNALNEGISRADVIITSGGVSMGEKDYLKQVLDIDLH…	lcl|GPHN_166:116-1750_ORF1_GPHN_166:115:1749	['GPHN_160_ORF1', 'GPHN_166_ORF1', 'GPHN_183_ORF2', 'GPHN_196_ORF2', 'GPHN_261_ORF2', 'GPHN_55_ORF2']
GPHN_167	ORF1	319	34.37	GPHN	PTC	ATGGCGACCGAGGGA	ATGGCGACCGAGGGAATGATCCTCACCAACCACGACCATCAAATCCGTGTCGGAGTCCTCACAGTGAGTGATAGCTGCTTCAGGAATCTTGCAGAAGACCGCAGTGGGATAAATCTAAAAGATCTTGTCCAAGATCCTTCTTTGTTGGGTGGGACTATATCGGCATACAAGATAGTACCAGATGAAATAGAAGAAATCAAGGAAACACTCATAGACTGGTGTGATGAAAAGGAACTTAATTTAATATTAACAACTGGAGGAACGGGGTTTGCACCACGAGATGTCACTCCAGAGAAATTCCCAACATTCCCATTTTGTGGGCTCCAGAAAGGGGCCACAAAAGAAGTAATAGAGCGGGAAGCGCCAGGGATGGCCCTGGCAATGCTGATGGGATCGCTC…	MATEGMILTNHDHQIRVGVLTVSDSCFRNLAEDRSGINLKDLVQDPSLLGGTISAYKIVPDEIEEIKETLIDWCDEKELNLILTTGGTGFAPRDVTPEKFPTFPFCGLQKGATKEVIEREAPGMALAMLMGSLNVTPLGMLSRPVCGIRGKTLIINLPGSKKGSQECFQFILPALPHAIDLLRDAIVKVKEVHDELEDLPSPPPPLSPPPTTSPHKQTEDKGVQCEEEEEEKKDSGVASTEDSSSSHITAAALAAKIPDSIISRGVQVLPRDTASLSTTPSESPRAQATSRLSTASCPTPKLNANVTLLQILLHQKSPR	lcl|GPHN_167:8-967_ORF1_GPHN_167:7:966	['GPHN_167_ORF1']
	ORF2	465	51.03	GPHN	E40	TTGGAAGGGCTTAAA	TTGGAAGGGCTTAAAGATGAACTCTGGAGGAATAGAGGCTACGACTTAAGAGTCCAGTCCAGGTGCAGCAGCAAGGAGAACATTCTAAGAGCCAGTCACAGTGCTGTAGATATCACCAAGGTGGCTAGAAGACATCGCATGTCTCCTTTTCCCCTGACGTCTATGGACAAAGCCTTCATTACAGTCCTGGAGATGACTCCGGTGCTTGGTACAGAAATCATCAATTACCGAGATGGAATGGGGCGAGTCCTTGCTCAAGATGTATATGCAAAAGACAACCTACCCCCATTCCCTGCATCAGTAAAAGATGGCTATGCTGTTCGAGCTGCTGATGGTCCAGGGGATCGTTTCATCATTGGGGAATCCCAAGCTGGTGAGCAGCCAACTCAGACAGTAATG…	MEGLKDELWRNRGYDLRVQSRCSSKENILRASHSAVDITKVARRHRMSPFPLTSMDKAFITVLEMTPVLGTEIINYRDGMGRVLAQDVYAKDNLPPFPASVKDGYAVRAADGPGDRFIIGESQAGEQPTQTVMPGQVMRVTTGAPIPCGADAVVQVEDTELIRESDDGTEELEVRILVQARPGQDIRPIGHDIKRGECVLAKGTHMGPSEIGLLATVGVTEVEVNKFPVVAVMSTGNELLNPEDDLLPGKIRDSNRSTLLATIQEHGYPTINLGIVGDNPDDLLNALNEGISRADVIITSGGVSMGEKDYLKQVLDIDLHAQIHFGRVFMKPGLPTTFATLDIDGVRKIIFALPGNPVSAVVTCNLFVVPALRKMQGILDPRPTIIKARLSCDVKLDPR…	lcl|GPHN_167:986-2383_ORF2_GPHN_167:985:2382	['GPHN_167_ORF2', 'GPHN_229_ORF1', 'GPHN_239_ORF1']
GPHN_168	ORF1	458	50.04	GPHN	E40	ATGGCGACCGAGGGA	ATGGCGACCGAGGGAATGATCCTCACCAACCACGACCATCAAATCCGTGTCGGAGTCCTCACAGTGAGTGATAGCTGCTTCAGGAATCTTGCAGAAGACCGCAGTGGGATAAATCTAAAAGATCTTGTCCAAGATCCTTCTTTGTTGGGTGGGACTATATCGGCATACAAGATAGTACCAGATGAAATAGAAGAAATCAAGGAAACACTCATAGACTGGTGTGATGAAAAGGAACTTAATTTAATATTAACAACTGGAGGAACGGGGTTTGCACCACGAGATGTCACTCCAGAGAAATTCCCAACATTCCCATTTTGTGGGCTCCAGAAAGGGGCCACAAAAGAAGTAATAGAGCGGGAAGCGCCAGGGATGGCCCTGGCAATGCTGATGGGATCGCTC…	MATEGMILTNHDHQIRVGVLTVSDSCFRNLAEDRSGINLKDLVQDPSLLGGTISAYKIVPDEIEEIKETLIDWCDEKELNLILTTGGTGFAPRDVTPEKFPTFPFCGLQKGATKEVIEREAPGMALAMLMGSLNVTPLGMLSRPVCGIRGKTLIINLPGSKKGSQECFQFILPALPHAIDLLRDAIVKVKEVHDELEDLPSPPPPLSPPPTTSPHKQTEDKGVQCEEEEEEKKDSGVASTEDSSSSHITAAALAAKIPDSIISRGVQVLPRDTASLSTTPSESPRAQATSRLSTASCPTPKDYLKQVLDIDLHAQIHFGRVFMKPGLPTTFATLDIDGVRKIIFALPGNPVSAVVTCNLFVVPALRKMQGILDPRPTIIKARLSCDVKLDPRPEYHRCI…	lcl|GPHN_168:8-1384_ORF1_GPHN_168:7:1383	['GPHN_168_ORF1']
GPHN_169	ORF1	111	13.08	unknown	PTC	CTGCAGCAGCTCTTG	CTGCAGCAGCTCTTGCTGCAAAGATTCCAGACTCCATCATTTCTCGTGGTGTTCAGGTGCTCCCACGAGACACAGCCTCCCTTAGCACTACTCCTTCAGAATCGCCCCGTGCTCAGGCTACATCTCGCCTCTCTACAGCTTCTTGTCCAACACCAAAACAAATTAGACGGCCGGATGAAAGCAAAGGAGTTGCTAGTAGAGTTGGATCCCTCAAATATCTATTATCACTGGGAGATTTTGTACATAAAACATTTAAGGCTCGGCTTCCGTCGTGCTCATCTACCTATAGTGTATCTGAGGTCCAGTCCAGGTGCAGCAGCAAGGAGAACATTCTAA	MQQLLLQRFQTPSFLVVFRCSHETQPPLALLLQNRPVLRLHLASLQLLVQHQNKLDGRMKAKELLVELDPSNIYYHWEILYIKHLRLGFRRAHLPIVYLRSSPGAAARRTF	lcl|GPHN_169:571-906_ORF1_GPHN_169:570:905	['GPHN_117_ORF2', 'GPHN_138_ORF2', 'GPHN_169_ORF1', 'GPHN_23_ORF2', 'GPHN_274_ORF2', 'GPHN_277_ORF2', 'GPHN_81_ORF2']
	ORF2	154	16.6	GPHN	PTC	ATGGCGACCGAGGGA	ATGGCGACCGAGGGAATGATCCTCACCAACCACGACCATCAAATCCGTGTCGGAGTCCTCACAGTGAGTGATAGCTGCTTCAGGAATCTTGCAGAAGACCGCAGTGGGATAAATCTAAAAGATCTTGTCCAAGATCCTTCTTTGTTGGGTGGGACTATATCGGCATACAAGATAGTACCAGATGAAATAGAAGAAATCAAGGAAACACTCATAGACTGGTGTGATGAAAAGGAACTTAATTTAATATTAACAACTGGAGGAACGGGGTTTGCACCACGAGATGTCACTCCAGAGGCCACAAAAGAAGTAATAGAGCGGGAAGCGCCAGGGATGGCCCTGGCAATGCTGATGGGATCGCTCAATGTCACACCTCTGGGCATGCTCTCTAGACCAGTGTGT…	MATEGMILTNHDHQIRVGVLTVSDSCFRNLAEDRSGINLKDLVQDPSLLGGTISAYKIVPDEIEEIKETLIDWCDEKELNLILTTGGTGFAPRDVTPEATKEVIEREAPGMALAMLMGSLNVTPLGMLSRPVCGIRGKTLIINLPGSKKGSQPT	lcl|GPHN_169:8-472_ORF2_GPHN_169:7:471	['GPHN_104_ORF1', 'GPHN_119_ORF2', 'GPHN_169_ORF2', 'GPHN_209_ORF1', 'GPHN_55_ORF1', 'GPHN_80_ORF1']
	ORF3	591	64.19	GPHN	E40	CTGGTAGCAAGAAAG	CTGGTAGCAAGAAAGGATCTCAGCCCACATAAACAGACAGAAGACAAAGGAGTTCAGTGTGAAGAAGAGGAAGAAGAAAAGAAAGACAGTGGTGTAGCTTCAACAGAAGATAGTTCCTCATCACATATAACTGCAGCAGCTCTTGCTGCAAAGATTCCAGACTCCATCATTTCTCGTGGTGTTCAGGTGCTCCCACGAGACACAGCCTCCCTTAGCACTACTCCTTCAGAATCGCCCCGTGCTCAGGCTACATCTCGCCTCTCTACAGCTTCTTGTCCAACACCAAAACAAATTAGACGGCCGGATGAAAGCAAAGGAGTTGCTAGTAGAGTTGGATCCCTCAAATATCTATTATCACTGGGAGATTTTGTACATAAAACATTTAAGGCTCGGCTTCCG…	MVARKDLSPHKQTEDKGVQCEEEEEEKKDSGVASTEDSSSSHITAAALAAKIPDSIISRGVQVLPRDTASLSTTPSESPRAQATSRLSTASCPTPKQIRRPDESKGVASRVGSLKYLLSLGDFVHKTFKARLPSCSSTYSVSEVQSRCSSKENILRASHSAVDITKVARRHRMSPFPLTSMDKAFITVLEMTPVLGTEIINYRDGMGRVLAQDVYAKDNLPPFPASVKDGYAVRAADGPGDRFIIGESQAGEQPTQTVMPGQVMRVTTGAPIPCGADAVVQVEDTELIRESDDGTEELEVRILVQARPGQDIRPIGHDIKRGECVLAKGTHMGPSEIGLLATVGVTEVEVNKFPVVAVMSTGNELLNPEDDLLPGKIRDSNRSTLLATIQEHGYPTINL…	lcl|GPHN_169:441-2216_ORF3_GPHN_169:440:2215	['GPHN_169_ORF3']
GPHN_170	ORF1	826	90	GPHN	E40	ATGGCGACCGAGGGA	ATGGCGACCGAGGGAATGATCCTCACCAACCACGACCATCAAATCCGTGTCGGAGTCCTCACAGTGAGTGATAGCTGCTTCAGGAATCTTGCAGAAGACCGCAGTGGGATAAATCTAAAAGATCTTGTCCAAGATCCTTCTTTGTTGGGTGGGACTATATCGGCATACAAGATAGTACCAGATGAAATAGAAGAAATCAAGGAAACACTCATAGACTGGTGTGATGAAAAGGAACTTAATTTAATATTAACAACTGGAGGAACGGGGTTTGCACCACGAGATGTCACTCCAGAGGCCACAAAAGAAGTAATAGAGCGGGAAGCGCCAGGGATGGCCCTGGCAATGCTGATGGGATCGCTCAATGTCACACCTCTGGGCATGCTCTCTAGACCAGTGTGT…	MATEGMILTNHDHQIRVGVLTVSDSCFRNLAEDRSGINLKDLVQDPSLLGGTISAYKIVPDEIEEIKETLIDWCDEKELNLILTTGGTGFAPRDVTPEATKEVIEREAPGMALAMLMGSLNVTPLGMLSRPVCGIRGKTLIINLPGSKKGSQECFQFILPALPHAIDLLRDAIVKVKEVHDELEDLPSPPPPLSPPPTTSPHKQTEDKGVQCEEEEEEKKDSGVASTEDSSSSHITAAALAAKKHPFYTSPALFMANHGQPIPGLISYSHHATGSADKRIPDSIISRGVQVLPRDTASLSTTPSESPRAQATSRLSTASCPTPKQIRRPDESKGVASRVGSLKYLLSLGDFVHKTFKLHSRLEGLKDELWRNRGYDLRVQSRCSSKENILRASHSAVDI…	lcl|GPHN_170:8-2488_ORF1_GPHN_170:7:2487	['GPHN_170_ORF1']
	ORF2	141	16.06	unknown	PTC	CTGCAGCAGCTCTTG	CTGCAGCAGCTCTTGCTGCAAAGAAGCATCCATTCTACACCAGTCCTGCTCTTTTCATGGCAAATCATGGGCAGCCCATCCCTGGTCTCATCAGTTATTCCCATCATGCAACAGGCAGTGCAGATAAACGGATTCCAGACTCCATCATTTCTCGTGGTGTTCAGGTGCTCCCACGAGACACAGCCTCCCTTAGCACTACTCCTTCAGAATCGCCCCGTGCTCAGGCTACATCTCGCCTCTCTACAGCTTCTTGTCCAACACCAAAACAAATTAGACGGCCGGATGAAAGCAAAGGAGTTGCTAGTAGAGTTGGATCCCTCAAATATCTATTATCACTGGGAGATTTTGTACATAAAACATTTAAGCTCCACTCTAGATTGGAAGGGCTTAAAGATGAAC…	MQQLLLQRSIHSTPVLLFSWQIMGSPSLVSSVIPIMQQAVQINGFQTPSFLVVFRCSHETQPPLALLLQNRPVLRLHLASLQLLVQHQNKLDGRMKAKELLVELDPSNIYYHWEILYIKHLSSTLDWKGLKMNSGGIEATT	lcl|GPHN_170:714-1139_ORF2_GPHN_170:713:1138	['GPHN_170_ORF2']
GPHN_171	ORF1	785	85.09	GPHN	E40	ATGGCGACCGAGGGA	ATGGCGACCGAGGGAATGATCCTCACCAACCACGACCATCAAATCCGTGTCGGAGTCCTCACAGTGAGTGATAGCTGCTTCAGGAATCTTGCAGAAGACCGCAGTGGGATAAATCTAAAAGATCTTGTCCAAGATCCTTCTTTGTTGGGTGGGACTATATCGGCATACAAGATAGTACCAGATGAAATAGAAGAAATCAAGGAAACACTCATAGACTGGTGTGATGAAAAGGAACTTAATTTAATATTAACAACTGGAGGAACGGGGTTTGCACCACGAGATGTCACTCCAGAGGCCACAAAAGAAGTAATAGAGCGGGAAGCGCCAGGGATGGCCCTGGCAATGCTGATGGGATCGCTCAATGTCACACCTCTGGGCATGCTCTCTAGACCAGTGTGT…	MATEGMILTNHDHQIRVGVLTVSDSCFRNLAEDRSGINLKDLVQDPSLLGGTISAYKIVPDEIEEIKETLIDWCDEKELNLILTTGGTGFAPRDVTPEATKEVIEREAPGMALAMLMGSLNVTPLGMLSRPVCGIRGKTLIINLPGSKKGSQECFQFILPALPHAIDLLRDAIVKVKEVHDELEDLPSPPPPLSPPPTTSPHKQTEDKGVQCEEEEEEKKDSGVASTEDSSSSHITAAALAAKKHPFYTSPALFMANHGQPIPGLISYSHHATGSADKRIPDSIISRGVQVLPRDTASLSTTPSESPRAQATSRLSTASCPTPKVQSRCSSKENILRASLNLKDLAFSRISGHSAVDITKVARRHRMSPFPLTSMDKAFITVLEMTPVLGTEIINYRDG…	lcl|GPHN_171:8-2365_ORF1_GPHN_171:7:2364	['GPHN_171_ORF1']
	ORF2	100	11.18	unknown	PTC	CTGCAGCAGCTCTTG	CTGCAGCAGCTCTTGCTGCAAAGAAGCATCCATTCTACACCAGTCCTGCTCTTTTCATGGCAAATCATGGGCAGCCCATCCCTGGTCTCATCAGTTATTCCCATCATGCAACAGGCAGTGCAGATAAACGGATTCCAGACTCCATCATTTCTCGTGGTGTTCAGGTGCTCCCACGAGACACAGCCTCCCTTAGCACTACTCCTTCAGAATCGCCCCGTGCTCAGGCTACATCTCGCCTCTCTACAGCTTCTTGTCCAACACCAAAAGTCCAGTCCAGGTGCAGCAGCAAGGAGAACATTCTAA	MQQLLLQRSIHSTPVLLFSWQIMGSPSLVSSVIPIMQQAVQINGFQTPSFLVVFRCSHETQPPLALLLQNRPVLRLHLASLQLLVQHQKSSPGAAARRTF	lcl|GPHN_171:714-1016_ORF2_GPHN_171:713:1015	['GPHN_105_ORF2', 'GPHN_116_ORF1', 'GPHN_119_ORF1', 'GPHN_143_ORF2', 'GPHN_144_ORF2', 'GPHN_164_ORF1', 'GPHN_171_ORF2', 'GPHN_185_ORF2', 'GPHN_190_ORF2', 'GPHN_241_ORF2', 'GPHN_254_ORF2', 'GPHN_38_ORF2', 'GPHN_4_ORF2', 'GPHN_51_ORF2', 'GPHN_57_ORF2', 'GPHN_77_ORF2', 'GPHN_95_ORF1']
GPHN_172	ORF1	696	75.1	GPHN	E40	ATGGCGACCGAGGGA	ATGGCGACCGAGGGAATGATCCTCACCAACCACGACCATCAAATCCGTGTCGGAGTCCTCACAGTGAGTGATAGCTGCTTCAGGAATCTTGCAGAAGACCGCAGTGGGATAAATCTAAAAGATCTTGTCCAAGATCCTTCTTTGTTGGGTGGGACTATATCGGCATACAAGATAGTACCAGATGAAATAGAAGAAATCAAGGAAACACTCATAGACTGGTGTGATGAAAAGGAACTTAATTTAATATTAACAACTGGAGGAACGGGGTTTGCACCACGAGATGTCACTCCAGAGGCCACAAAAGAAGTAATAGAGCGGGAAGCGCCAGGGATGGCCCTGGCAATGCTGATGGGATCGCTCAATGTCACACCTCTGGGCATGCTCTCTAGACCAGTGTGT…	MATEGMILTNHDHQIRVGVLTVSDSCFRNLAEDRSGINLKDLVQDPSLLGGTISAYKIVPDEIEEIKETLIDWCDEKELNLILTTGGTGFAPRDVTPEATKEVIEREAPGMALAMLMGSLNVTPLGMLSRPVCGIRGKTLIINLPGSKKGSQECFQFILPALPHAIDLLRDAIVKVKEVHDELEDLPSPPPPLSPPPTTSPHKQTEDKGVQCEEEEEEKKDSGVASTEDSSSSHITAAALAAKIPDSIISRGVQVLPRDTASLSTTPSESPRAQATSRLSTASCPTPKQIRRPDESKGVASRVGSLKYLLSLGDFVHKTFKVQSRCSSKENILRASHSAVDITKVARRHRMSPFPLTSMDKAFITVLEMTPVLGTEIINYRDGMGRVLAQDVYAKDNLP…	lcl|GPHN_172:8-2098_ORF1_GPHN_172:7:2097	['GPHN_172_ORF1']
GPHN_173	ORF1	419	45.61	GPHN	E40	ATGTCTCCTTTTCCC	ATGTCTCCTTTTCCCCTGACGTCTATGGACAAAGCCTTCATTACAGTCCTGGAGATGACTCCGGTGCTTGGTACAGAAATCATCAATTACCGAGATGGAATGGGGCGAGTCCTTGCTCAAGATGTATATGCAAAAGACAACCTACCCCCATTCCCTGCATCAGTAAAAGATGGCTATGCTGTTCGAGCTGCTGATGGTCCAGGGGATCGTTTCATCATTGGGGAATCCCAAGCTGGTGAGCAGCCAACTCAGACAGTAATGCCAGGACAAGTGATGCGGGTTACAACAGGTGCTCCAATCCCCTGCGGTGCTGATGCAGTAGTGCAAGTTGAAGATACTGAACTCATCAGGGAATCAGATGATGGTACTGAAGAACTTGAAGTACGAATTCTGGTGCAA…	MSPFPLTSMDKAFITVLEMTPVLGTEIINYRDGMGRVLAQDVYAKDNLPPFPASVKDGYAVRAADGPGDRFIIGESQAGEQPTQTVMPGQVMRVTTGAPIPCGADAVVQVEDTELIRESDDGTEELEVRILVQARPGQDIRPIGHDIKRGECVLAKGTHMGPSEIGLLATVGVTEVEVNKFPVVAVMSTGNELLNPEDDLLPGKIRDSNRSTLLATIQEHGYPTINLGIVGDNPDDLLNALNEGISRADVIITSGGVSMGEKDYLKQVLDIDLHAQIHFGRVFMKPGLPTTFATLDIDGVRKIIFALPGNPVSAVVTCNLFVVPALRKMQGILDPRPTIIKARLSCDVKLDPRPEYHRCILTWHHQEPLPWAQSTGNQMSSRLMSMRSANGLLMLPPKT…	lcl|GPHN_173:619-1878_ORF1_GPHN_173:618:1877	['GPHN_110_ORF1', 'GPHN_15_ORF1', 'GPHN_173_ORF1', 'GPHN_192_ORF2', 'GPHN_209_ORF3', 'GPHN_227_ORF2', 'GPHN_228_ORF2', 'GPHN_257_ORF1', 'GPHN_264_ORF2', 'GPHN_265_ORF2', 'GPHN_268_ORF2', 'GPHN_30_ORF1', 'GPHN_36_ORF1', 'GPHN_52_ORF1', 'GPHN_80_ORF2']
	ORF2	186	20.46	GPHN	PTC	ATGGCGACCGAGGGA	ATGGCGACCGAGGGAATGATCCTCACCAACCACGACCATCAAATCCGTGTCGGAGTCCTCACAGTGAGTGATAGCTGCTTCAGGAATCTTGCAGAAGACCGCAGTGGGATAAATCTAAAAGATCTTGTCCAAGATCCTTCTTTGTTGGGTGGGACTATATCGGCATACAAGATAGTACCAGATGAAATAGAAGAAATCAAGGAAACACTCATAGACTGGTGTGATGAAAAGGAACTTAATTTAATATTAACAACTGGAGGAACGGGGTTTGCACCACGAGATGTCACTCCAGAGGCCACAAAAGAAGTAATAGAGCGGGAAGCGCCAGGGATGGCCCTGGCAATGCTGATGGGATCGCTCAATGTCACACCTCTGGGCATGCTCTCTAGATTCCAGACT…	MATEGMILTNHDHQIRVGVLTVSDSCFRNLAEDRSGINLKDLVQDPSLLGGTISAYKIVPDEIEEIKETLIDWCDEKELNLILTTGGTGFAPRDVTPEATKEVIEREAPGMALAMLMGSLNVTPLGMLSRFQTPSFLVVFRCSHETQPPLALLLQNRPVLRLHLASLQLLVQHQKSSPGAAARRTF	lcl|GPHN_173:8-568_ORF2_GPHN_173:7:567	['GPHN_173_ORF2']
GPHN_174	ORF1	110	12.12	GPHN	PTC	ATGGCGACCGAGGGA	ATGGCGACCGAGGGAATGATCCTCACCAACCACGACCATCAAATCCGTGTCGGAGTCCTCACAGTGAGTGATAGCTGCTTCAGGAATCTTGCAGAAGACCGCAGTGGGATAAATCTAAAAGATCTTGTCCAAGATCCTTCTTTGTTGGGTGGGACTATATCGGCATACAAGATAGTACCAGATGAAATAGAAGAAATCAAGGAAACACTCATAGACTGGTGTGATGAAAAGGAACTTAATTTAATATTAACAACTGGAGGAACGGGGTTTGCACCACGAGATGTCACTCCAGAGACCAGTGTGTGGAATAAGGGGGAAAACTCTGATAATTAA	MATEGMILTNHDHQIRVGVLTVSDSCFRNLAEDRSGINLKDLVQDPSLLGGTISAYKIVPDEIEEIKETLIDWCDEKELNLILTTGGTGFAPRDVTPETSVWNKGENSDN	lcl|GPHN_174:8-340_ORF1_GPHN_174:7:339	['GPHN_160_ORF2', 'GPHN_164_ORF2', 'GPHN_174_ORF1', 'GPHN_192_ORF1', 'GPHN_62_ORF1']
	ORF2	653	71.07	GPHN	E40	CTGGAGGAACGGGGT	CTGGAGGAACGGGGTTTGCACCACGAGATGTCACTCCAGAGACCAGTGTGTGGAATAAGGGGGAAAACTCTGATAATTAACCTACCTGGTAGCAAGAAAGGATCTCAGGAATGCTTTCAGTTCATACTGCCAGCTCTACCTCATGCCATTGACCTTTTACGTGATGCCATTGTAAAAGTAAAGGAGGTGCATGATGAACTTGAAGATTTACCTTCCCCACCACCTCCTCTCTCTCCACCTCCTACAACTAGCCCACATAAACAGACAGAAGACAAAGGAGTTCAGTGTGAAGAAGAGGAAGAAGAAAAGAAAGACAGTGGTGTAGCTTCAACAGAAGATAGTTCCTCATCACATATAACTGCAGCAGCTCTTGCTGCAAAGATTCCAGACTCCATCATT…	MEERGLHHEMSLQRPVCGIRGKTLIINLPGSKKGSQECFQFILPALPHAIDLLRDAIVKVKEVHDELEDLPSPPPPLSPPPTTSPHKQTEDKGVQCEEEEEEKKDSGVASTEDSSSSHITAAALAAKIPDSIISRGVQVLPRDTASLSTTPSESPRAQATSRLSTASCPTPKQIRRPDESKGVASRVGSLKYLLSLGDFVHKTFKVQSRCSSKENILRASHSAVDITKVARRHRMSPFPLTSMDKAFITVLEMTPVLGTEIINYRDGMGRVLAQDVYAKDNLPPFPASVKDGYAVRAADGPGDRFIIGESQAGEQPTQTVMPGQVMRVTTGAPIPCGADAVVQVEDTELIRESDDGTEELEVRILVQARPGQDIRPIGHDIKRGECVLAKGTHMGPSEI…	lcl|GPHN_174:261-2222_ORF2_GPHN_174:260:2221	['GPHN_174_ORF2']
GPHN_175	ORF1	682	74.14	GPHN	E40	ATGGCGACCGAGGGA	ATGGCGACCGAGGGAATGATCCTCACCAACCACGACCATCAAATCCGTGTCGGAGTCCTCACAGTGAGTGATAGCTGCTTCAGGAATCTTGCAGAAGACCGCAGTGGGATAAATCTAAAAGATCTTGTCCAAGATCCTTCTTTGTTGGGTGGGACTATATCGGCATACAAGATAGTACCAGATGAAATAGAAGAAATCAAGGAAACACTCATAGACTGGTGTGATGAAAAGGAACTTAATTTAATATTAACAACTGGAGGAACGGGGTTTGCACCACGAGATGTCACTCCAGAGGAATGCTTTCAGTTCATACTGCCAGCTCTACCTCATGCCATTGACCTTTTACGTGATGCCATTGTAAAAGTAAAGGAGGTGCATGATGAACTTGAAGATTTACCT…	MATEGMILTNHDHQIRVGVLTVSDSCFRNLAEDRSGINLKDLVQDPSLLGGTISAYKIVPDEIEEIKETLIDWCDEKELNLILTTGGTGFAPRDVTPEECFQFILPALPHAIDLLRDAIVKVKEVHDELEDLPSPPPPLSPPPTTSPHKQTEDKGVQCEEEEEEKKDSGVASTEDSSSSHITAAALAAKIPDSIISRGVQVLPRDTASLSTTPSESPRAQATSRLSTASCPTPKVQSRCSSKENILRASHSAVDITKVARRHRMSPFPLTSMDKAFITVLEMTPVLGTEIINYRDGMGRVLAQDVYAKDNLPPFPASVKDGYAVRAADGPGDRFIIGESQAGEQPTQTVMPGQVMRVTTGAPIPCGADAVVQVEDTELIRESDDGTEELEVRILVQARP…	lcl|GPHN_175:8-2056_ORF1_GPHN_175:7:2055	['GPHN_175_ORF1']
GPHN_176	ORF1	597	64.16	GPHN	PTC	ATGGCGACCGAGGGA	ATGGCGACCGAGGGAATGATCCTCACCAACCACGACCATCAAATCCGTGTCGGAGTCCTCACAGTGAGTGATAGCTGCTTCAGGAATCTTGCAGAAGACCGCAGTGGGATAAATCTAAAAGATCTTGTCCAAGATCCTTCTTTGTTGGGTGGGACTATATCGGCATACAAGATAGTACCAGATGAAATAGAAGAAATCAAGGCCACAAAAGAAGTAATAGAGCGGGAAGCGCCAGGGATGGCCCTGGCAATGCTGATGGGATCGCTCAATGTCACACCTCTGGGCATGCTCTCTAGACCAGTGTGTGGAATAAGGGGGAAAACTCTGATAATTAACCTACCTGGTAGCAAGAAAGGATCTCAGGAATGCTTTCAGTTCATACTGCCAGCTCTACCTCAT…	MATEGMILTNHDHQIRVGVLTVSDSCFRNLAEDRSGINLKDLVQDPSLLGGTISAYKIVPDEIEEIKATKEVIEREAPGMALAMLMGSLNVTPLGMLSRPVCGIRGKTLIINLPGSKKGSQECFQFILPALPHAIDLLRDAIVKVKEVHDELEDLPSPPPPLSPPPTTSPHKQTEDKGVQCEEEEEEKKDSGVASTEDSSSSHITAAALAAKIPDSIISRGVQVLPRDTASLSTTPSESPRAQATSRLSTASCPTPKVQSRCSSKENILRASHSAVDITKVARRHRMSPFPLTSMDKAFITVLEMTPVLGTEIINYRDGMGRVLAQDVYAKDNLPPFPASVKDGYAVRAADGPGDRFIIGESQAGEQPTQTVMPGQVMRVTTGAPIPCGADAVVQVEDT…	lcl|GPHN_176:8-1801_ORF1_GPHN_176:7:1800	['GPHN_176_ORF1']
GPHN_177	ORF1	484	52.58	GPHN	E40	ATGGCGACCGAGGGA	ATGGCGACCGAGGGAATGATCCTCACCAACCACGACCATCAAATCCGTGTCGGAGTCCTCACAGTGAGTGATAGCTGCTTCAGGAATCTTGCAGAAGACCGCAGTGGGATAAATCTAAAAGATCTTGTCCAAGATCCTTCTTTGTTGGGTGGGACTATATCGGCATACAAGATAGTACCAGATGAAATAGAAGAAATCAAGGCCACAAAAGAAGTAATAGAGCGGGAAGCGCCAGGGATGGCCCTGGCAATGCTGATGGGATCGCTCAATGTCACACCTCTGGGCATGCTCTCTAGACCAGTGTGTGGAATAAGGGGGAAAACTCTGATAATTAACCTACCTGGTAGCAAGAAAGGATCTCAGGAATGCTTTCAGTTCATACTGCCAGCTCTACCTCAT…	MATEGMILTNHDHQIRVGVLTVSDSCFRNLAEDRSGINLKDLVQDPSLLGGTISAYKIVPDEIEEIKATKEVIEREAPGMALAMLMGSLNVTPLGMLSRPVCGIRGKTLIINLPGSKKGSQECFQFILPALPHAIDLLRDAIVKVKEVHDELEDLPSPPPPLSPPPTTSPHKQTEDKGVQCEEEEEEKKDSGVASTEDSSSSHITAAALAAKIPDSIISRGVQVLPRDTASLSTTPSESPRAQATSRLSTASCPTPKLLNPEDDLLPGKIRDSNRSTLLATIQEHGYPTINLGIVGDNPDDLLNALNEGISRADVIITSGGVSMGEKDYLKQVLDIDLHAQIHFGRVFMKPGLPTTFATLDIDGVRKIIFALPGNPVSAVVTCNLFVVPALRKMQGILD…	lcl|GPHN_177:8-1462_ORF1_GPHN_177:7:1461	['GPHN_177_ORF1']
GPHN_178	ORF1	746	81.59	GPHN	E40	CTGCTTCAGGAATCT	CTGCTTCAGGAATCTTGCAGAAGACCGCAGTGGGATAAATCTAAAAGATCTTGTCCAAGATCCTTCTTTGAAACACTCATAGACTGGTGTGATGAAAAGGAACTTAATTTAATATTAACAACTGGAGGAACGGGGTTTGCACCACGAGATGTCACTCCAGAGGCCACAAAAGAAGTAATAGAGCGGGAAGCGCCAGGGATGGCCCTGGCAATGCTGATGGGATCGCTCAATGTCACACCTCTGGGCATGCTCTCTAGACCAGTGTGTGGAATAAGGGGGAAAACTCTGATAATTAACCTACCTGGTAGCAAGAAAGGATCTCAGGAATGCTTTCAGTTCATACTGCCAGCTCTACCTCATGCCATTGACCTTTTACGTGATGCCATTGTAAAAGTAAAG…	MLQESCRRPQWDKSKRSCPRSFFETLIDWCDEKELNLILTTGGTGFAPRDVTPEATKEVIEREAPGMALAMLMGSLNVTPLGMLSRPVCGIRGKTLIINLPGSKKGSQECFQFILPALPHAIDLLRDAIVKVKEVHDELEDLPSPPPPLSPPPTTSPHKQTEDKGVQCEEEEEEKKDSGVASTEDSSSSHITAAALAAKIPDSIISRGVQVLPRDTASLSTTPSESPRAQATSRLSTASCPTPKQIRRPDESKGVASRVGSLKYLLSLGDFVHKTFKLHSRLEGLKDELWRNRGYDLRVQSRCSSKENILRASHSAVDITKVARRHRMSPFPLTSMDKAFITVLEMTPVLGTEIINYRDGMGRVLAQDVYAKDNLPPFPASVKDGYAVRAADGPGDRFI…	lcl|GPHN_178:82-2322_ORF1_GPHN_178:81:2321	['GPHN_178_ORF1']
	ORF2	105	12.21	unknown	PTC	CTGCAGCAGCTCTTG	CTGCAGCAGCTCTTGCTGCAAAGATTCCAGACTCCATCATTTCTCGTGGTGTTCAGGTGCTCCCACGAGACACAGCCTCCCTTAGCACTACTCCTTCAGAATCGCCCCGTGCTCAGGCTACATCTCGCCTCTCTACAGCTTCTTGTCCAACACCAAAACAAATTAGACGGCCGGATGAAAGCAAAGGAGTTGCTAGTAGAGTTGGATCCCTCAAATATCTATTATCACTGGGAGATTTTGTACATAAAACATTTAAGCTCCACTCTAGATTGGAAGGGCTTAAAGATGAACTCTGGAGGAATAGAGGCTACGACTTAA	MQQLLLQRFQTPSFLVVFRCSHETQPPLALLLQNRPVLRLHLASLQLLVQHQNKLDGRMKAKELLVELDPSNIYYHWEILYIKHLSSTLDWKGLKMNSGGIEATT	lcl|GPHN_178:656-973_ORF2_GPHN_178:655:972	['GPHN_103_ORF2', 'GPHN_12_ORF2', 'GPHN_178_ORF2', 'GPHN_180_ORF1', 'GPHN_263_ORF2', 'GPHN_273_ORF2', 'GPHN_48_ORF2']
GPHN_179	ORF1	570	62.04	GPHN	E40	CTGCTTCAGGAATCT	CTGCTTCAGGAATCTTGCAGAAGACCGCAGTGGGATAAATCTAAAAGATCTTGTCCAAGATCCTTCTTTGCCACAAAAGAAGTAATAGAGCGGGAAGCGCCAGGGATGGCCCTGGCAATGCTGATGGGATCGCTCAATGTCACACCTCTGGGCATGCTCTCTAGACCAGTGTGTGGAATAAGGGGGAAAACTCTGATAATTAACCTACCTGGTAGCAAGAAAGGATCTCAGATTCCAGACTCCATCATTTCTCGTGGTGTTCAGGTGCTCCCACGAGACACAGCCTCCCTTAGCACTACTCCTTCAGAATCGCCCCGTGCTCAGGCTACATCTCGCCTCTCTACAGCTTCTTGTCCAACACCAAAAGTCCAGTCCAGGTGCAGCAGCAAGGAGAACATT…	MLQESCRRPQWDKSKRSCPRSFFATKEVIEREAPGMALAMLMGSLNVTPLGMLSRPVCGIRGKTLIINLPGSKKGSQIPDSIISRGVQVLPRDTASLSTTPSESPRAQATSRLSTASCPTPKVQSRCSSKENILRASHSAVDITKVARRHRMSPFPLTSMDKAFITVLEMTPVLGTEIINYRDGMGRVLAQDVYAKDNLPPFPASVKDGYAVRAADGPGDRFIIGESQAGEQPTQTVMPGQVMRVTTGAPIPCGADAVVQVEDTELIRESDDGTEELEVRILVQARPGQDIRPIGHDIKRGECVLAKGTHMGPSEIGLLATVGVTEVEVNKFPVVAVMSTGNELLNPEDDLLPGKIRDSNRSTLLATIQEHGYPTINLGIVGDNPDDLLNALNEGISRA…	lcl|GPHN_179:82-1794_ORF1_GPHN_179:81:1793	['GPHN_179_ORF1']
GPHN_180	ORF1	105	12.21	unknown	PTC	CTGCAGCAGCTCTTG	CTGCAGCAGCTCTTGCTGCAAAGATTCCAGACTCCATCATTTCTCGTGGTGTTCAGGTGCTCCCACGAGACACAGCCTCCCTTAGCACTACTCCTTCAGAATCGCCCCGTGCTCAGGCTACATCTCGCCTCTCTACAGCTTCTTGTCCAACACCAAAACAAATTAGACGGCCGGATGAAAGCAAAGGAGTTGCTAGTAGAGTTGGATCCCTCAAATATCTATTATCACTGGGAGATTTTGTACATAAAACATTTAAGCTCCACTCTAGATTGGAAGGGCTTAAAGATGAACTCTGGAGGAATAGAGGCTACGACTTAA	MQQLLLQRFQTPSFLVVFRCSHETQPPLALLLQNRPVLRLHLASLQLLVQHQNKLDGRMKAKELLVELDPSNIYYHWEILYIKHLSSTLDWKGLKMNSGGIEATT	lcl|GPHN_180:577-894_ORF1_GPHN_180:576:893	['GPHN_103_ORF2', 'GPHN_12_ORF2', 'GPHN_178_ORF2', 'GPHN_180_ORF1', 'GPHN_263_ORF2', 'GPHN_273_ORF2', 'GPHN_48_ORF2']
	ORF2	680	74.03	GPHN	E40	ATGGCCCTGGCAATG	ATGGCCCTGGCAATGCTGATGGGATCGCTCAATGTCACACCTCTGGGCATGCTCTCTAGACCAGTGTGTGGAATAAGGGGGAAAACTCTGATAATTAACCTACCTGGTAGCAAGAAAGGATCTCAGGAATGCTTTCAGTTCATACTGCCAGCTCTACCTCATGCCATTGACCTTTTACGTGATGCCATTGTAAAAGTAAAGGAGGTGCATGATGAACTTGAAGATTTACCTTCCCCACCACCTCCTCTCTCTCCACCTCCTACAACTAGCCCACATAAACAGACAGAAGACAAAGGAGTTCAGTGTGAAGAAGAGGAAGAAGAAAAGAAAGACAGTGGTGTAGCTTCAACAGAAGATAGTTCCTCATCACATATAACTGCAGCAGCTCTTGCTGCAAAG…	MALAMLMGSLNVTPLGMLSRPVCGIRGKTLIINLPGSKKGSQECFQFILPALPHAIDLLRDAIVKVKEVHDELEDLPSPPPPLSPPPTTSPHKQTEDKGVQCEEEEEEKKDSGVASTEDSSSSHITAAALAAKIPDSIISRGVQVLPRDTASLSTTPSESPRAQATSRLSTASCPTPKQIRRPDESKGVASRVGSLKYLLSLGDFVHKTFKLHSRLEGLKDELWRNRGYDLRVQSRCSSKENILRASHSAVDITKVARRHRMSPFPLTSMDKAFITVLEMTPVLGTEIINYRDGMGRVLAQDVYAKDNLPPFPASVKDGYAVRAADGPGDRFIIGESQAGEQPTQTVMPGQVMRVTTGAPIPCGADAVVQVEDTELIRESDDGTEELEVRILVQARPGQ…	lcl|GPHN_180:201-2243_ORF2_GPHN_180:200:2242	['GPHN_180_ORF2']
GPHN_181	ORF1	266	29.12	GPHN	E40	TTGGCCAAAGGAACC	TTGGCCAAAGGAACCCATATGGGCCCTTCAGAGATTGGTCTCCTTGCAACTGTGGGTGTCACAGAAGTGGAAGTTAATAAGTTTCCAGTGGTTGCCGTTATGTCAACAGGGAATGAGCTGCTAAATCCTGAAGATGATCTCTTACCAGGAAAGATTCGGGACAGCAATCGATCAACACTTCTAGCAACAATTCAGGAACATGGTTACCCAACAATCAACCTGGGAATTGTAGGAGACAACCCAGATGACTTACTCAATGCCTTGAATGAGGGTATCAGCCGTGCTGATGTCATCATCACGTCAGGAGGTGTGTCCATGGGGGAAAAGGACTATCTCAAGCAGGTGCTGGACATTGATCTTCATGCTCAGATCCATTTTGGCAGAGTTTTTATGAAGCCA…	MAKGTHMGPSEIGLLATVGVTEVEVNKFPVVAVMSTGNELLNPEDDLLPGKIRDSNRSTLLATIQEHGYPTINLGIVGDNPDDLLNALNEGISRADVIITSGGVSMGEKDYLKQVLDIDLHAQIHFGRVFMKPGLPTTFATLDIDGVRKIIFALPGNPVSAVVTCNLFVVPALRKMQGILDPRPTIIKARLSCDVKLDPRPEYHRCILTWHHQEPLPWAQSTGNQMSSRLMSMRSANGLLMLPPKTEQYVELHKGEVVDVMVIGRL	lcl|GPHN_181:1426-2226_ORF1_GPHN_181:1425:2225	['GPHN_181_ORF1']
	ORF2	459	49.57	GPHN	PTC	ATGGCGACCGAGGGA	ATGGCGACCGAGGGAATGATCCTCACCAACCACGACCATCAAATCCGTGTCGGAGTCCTCACAGTGAGTGATAGCTGCTTCAGGAATCTTGCAGAAGACCGCAGTGGGATAAATCTAAAAGATCTTGTCCAAGATCCTTCTTTGTTGGGTGGGACTATATCGGCATACAAGATAGTACCAGATGAAATAGAAGAAATCAAGGAAACACTCATAGACTGGTGTGATGAAAAGGAACTTAATTTAATATTAACAACTGGAGGAACGGGGTTTGCACCACGAGATGTCACTCCAGAGGCCACAAAAGAAGTAATAGAGCGGGAAGCGCCAGGGATGGCCCTGGCAATGCTGATGGGATCGCTCAATGTCACACCTCTGGGCATGCTCTCTAGACCAGTGTGT…	MATEGMILTNHDHQIRVGVLTVSDSCFRNLAEDRSGINLKDLVQDPSLLGGTISAYKIVPDEIEEIKETLIDWCDEKELNLILTTGGTGFAPRDVTPEATKEVIEREAPGMALAMLMGSLNVTPLGMLSRPVCGIRGKTLIINLPGSKKGSQECFQFILPALPHAIDLLRDAIVKVKEVHDELEDLPSPPPPLSPPPTTSPHKQTEDKGVQCEEEEEEKKDSGVASTEDSSSSHITAAALAAKIPDSIISRGVQVLPRDTASLSTTPSESPRAQATSRLSTASCPTPKVQSRCSSKENILRASHSAVDITKVARRHRMSPFPLTSMDKAFITVLEMTPVLGTEIINYRDGMGRVLAQDVYAKDNLPPFPASVKDGYAVRAADGPGDRFIIGESQAGEQP…	lcl|GPHN_181:8-1387_ORF2_GPHN_181:7:1386	['GPHN_181_ORF2']
GPHN_182	ORF1	248	26.8	GPHN	PTC	CTGCTTCAGGAATCT	CTGCTTCAGGAATCTTGCAGAAGACCGCAGTGGGATAAATCTAAAAGATCTTGTCCAAGATCCTTCTTTGAAACACTCATAGACTGGTGTGATGAAAAGGAACTTAATTTAATATTAACAACTGGAGGAACGGGGTTTGCACCACGAGATGTCACTCCAGAGGCCACAAAAGAAGTAATAGAGCGGGAAGCGCCAGGGATGGCCCTGGCAATGCTGATGGGATCGCTCAATGTCACACCTCTGGGCATGCTCTCTAGACCAGTGTGTGGAATAAGGGGGAAAACTCTGATAATTAACCTACCTGGTAGCAAGAAAGGATCTCAGGAATGCTTTCAGTTCATACTGCCAGCTCTACCTCATGCCATTGACCTTTTACGTGATGCCATTGTAAAAGTAAAG…	MLQESCRRPQWDKSKRSCPRSFFETLIDWCDEKELNLILTTGGTGFAPRDVTPEATKEVIEREAPGMALAMLMGSLNVTPLGMLSRPVCGIRGKTLIINLPGSKKGSQECFQFILPALPHAIDLLRDAIVKVKEVHDELEDLPSPPPPLSPPPTTSPHKQTEDKGVQCEEEEEEKKDSGVASTEDSSSSHITAAALAAKIPDSIISRGVQVLPRDTASLSTTPSESPRAQATSRLSTASCPTPKVTVL	lcl|GPHN_182:82-828_ORF1_GPHN_182:81:827	['GPHN_182_ORF1']
	ORF2	439	47.89	GPHN	E40	TTGTCCAACACCAAA	TTGTCCAACACCAAAAGTCACAGTGCTGTAGATATCACCAAGGTGGCTAGAAGACATCGCATGTCTCCTTTTCCCCTGACGTCTATGGACAAAGCCTTCATTACAGTCCTGGAGATGACTCCGGTGCTTGGTACAGAAATCATCAATTACCGAGATGGAATGGGGCGAGTCCTTGCTCAAGATGTATATGCAAAAGACAACCTACCCCCATTCCCTGCATCAGTAAAAGATGGCTATGCTGTTCGAGCTGCTGATGGTCCAGGGGATCGTTTCATCATTGGGGAATCCCAAGCTGGTGAGCAGCCAACTCAGACAGTAATGCCAGGACAAGTGATGCGGGTTACAACAGGTGCTCCAATCCCCTGCGGTGCTGATGCAGTAGTGCAAGTTGAAGATACT…	MSNTKSHSAVDITKVARRHRMSPFPLTSMDKAFITVLEMTPVLGTEIINYRDGMGRVLAQDVYAKDNLPPFPASVKDGYAVRAADGPGDRFIIGESQAGEQPTQTVMPGQVMRVTTGAPIPCGADAVVQVEDTELIRESDDGTEELEVRILVQARPGQDIRPIGHDIKRGECVLAKGTHMGPSEIGLLATVGVTEVEVNKFPVVAVMSTGNELLNPEDDLLPGKIRDSNRSTLLATIQEHGYPTINLGIVGDNPDDLLNALNEGISRADVIITSGGVSMGEKDYLKQVLDIDLHAQIHFGRVFMKPGLPTTFATLDIDGVRKIIFALPGNPVSAVVTCNLFVVPALRKMQGILDPRPTIIKARLSCDVKLDPRPEYHRCILTWHHQEPLPWAQSTGNQM…	lcl|GPHN_182:798-2117_ORF2_GPHN_182:797:2116	['GPHN_100_ORF1', 'GPHN_101_ORF1', 'GPHN_151_ORF1', 'GPHN_17_ORF1', 'GPHN_182_ORF2', 'GPHN_244_ORF1', 'GPHN_67_ORF1']
GPHN_183	ORF1	106	11.33	GPHN	PTC	TTGGGTGGGACTATA	TTGGGTGGGACTATATCGGCATACAAGATAGTACCAGATGAAATAGAAGAAATCAAGGAAACACTCATAGACTGGTGTGATGAAAAGGAACTTAATTTAATATTAACAACTGGAGGAACGGGGTTTGCACCACGAGATGTCACTCCAGAGGCCACAAAAGAAGTAATAGAGCGGGAAGCGCCAGGGATGGCCCTGGCAATGCTGATGGGATCGCTCAATGTCACACCTCTGGGCATGCTCTCTAGACCAGTGTGTGGAATAAGGGGGAAAACTCTGATAATTAACCTACCTGGTAGCAAGAAAGGATCTCAGCCCACATAA	MGGTISAYKIVPDEIEEIKETLIDWCDEKELNLILTTGGTGFAPRDVTPEATKEVIEREAPGMALAMLMGSLNVTPLGMLSRPVCGIRGKTLIINLPGSKKGSQPT	lcl|GPHN_183:73-393_ORF1_GPHN_183:72:392	['GPHN_183_ORF1']
	ORF2	544	59.01	GPHN	E40	CTGGTAGCAAGAAAG	CTGGTAGCAAGAAAGGATCTCAGCCCACATAAACAGACAGAAGACAAAGGAGTTCAGTGTGAAGAAGAGGAAGAAGAAAAGAAAGACAGTGGTGTAGCTTCAACAGAAGATAGTTCCTCATCACATATAACTGCAGCAGCTCTTGCTGCAAAGATTCCAGACTCCATCATTTCTCGTGGTGTTCAGGTGCTCCCACGAGACACAGCCTCCCTTAGCACTACTCCTTCAGAATCGCCCCGTGCTCAGGCTACATCTCGCCTCTCTACAGCTTCTTGTCCAACACCAAAAGTCCAGTCCAGGTGCAGCAGCAAGGAGAACATTCTAAGAGCCAGTCACAGTGCTGTAGATATCACCAAGGTGGCTAGAAGACATCGCATGTCTCCTTTTCCCCTGACGTCT…	MVARKDLSPHKQTEDKGVQCEEEEEEKKDSGVASTEDSSSSHITAAALAAKIPDSIISRGVQVLPRDTASLSTTPSESPRAQATSRLSTASCPTPKVQSRCSSKENILRASHSAVDITKVARRHRMSPFPLTSMDKAFITVLEMTPVLGTEIINYRDGMGRVLAQDVYAKDNLPPFPASVKDGYAVRAADGPGDRFIIGESQAGEQPTQTVMPGQVMRVTTGAPIPCGADAVVQVEDTELIRESDDGTEELEVRILVQARPGQDIRPIGHDIKRGECVLAKGTHMGPSEIGLLATVGVTEVEVNKFPVVAVMSTGNELLNPEDDLLPGKIRDSNRSTLLATIQEHGYPTINLGIVGDNPDDLLNALNEGISRADVIITSGGVSMGEKDYLKQVLDIDLH…	lcl|GPHN_183:362-1996_ORF2_GPHN_183:361:1995	['GPHN_160_ORF1', 'GPHN_166_ORF1', 'GPHN_183_ORF2', 'GPHN_196_ORF2', 'GPHN_261_ORF2', 'GPHN_55_ORF2']
GPHN_184	ORF1	357	38.86	GPHN	E40	CTGCCAGCTCTACCT	CTGCCAGCTCTACCTCATGCCATTGACCTTTTACGTGATGCCATTGTAAAAGTAAAGGAGGTGCATGATGAACTTGAAGATTTACCTTCCCCACCACCTCCTCTCTCTCCACCTCCTACAACTAGCCCACATAAACAGACAGAAGACAAAGGAGTTCAGTGTGAAGAAGAGGAAGAAGAAAAGAAAGACAGTGGTGTAGCTTCAACAGAAGATAGTTCCTCATCACATATAACTGCAGCAGCTCTTGCTGCAAAGATTCCAGACTCCATCATTTCTCGTGGTGTTCAGGTGCTCCCACGAGACACAGCCTCCCTTAGCACTACTCCTTCAGAATCGCCCCGTGCTCAGGCTACATCTCGCCTCTCTACAGCTTCTTGTCCAACACCAAAACTGCTAAAT…	MPALPHAIDLLRDAIVKVKEVHDELEDLPSPPPPLSPPPTTSPHKQTEDKGVQCEEEEEEKKDSGVASTEDSSSSHITAAALAAKIPDSIISRGVQVLPRDTASLSTTPSESPRAQATSRLSTASCPTPKLLNPEDDLLPGKIRDSNRSTLLATIQEHGYPTINLGIVGDNPDDLLNALNEGISRADVIITSGGVSMGEKDYLKQVLDIDLHAQIHFGRVFMKPGLPTTFATLDIDGVRKIIFALPGNPVSAVVTCNLFVVPALRKMQGILDPRPTIIKARLSCDVKLDPRPEYHRCILTWHHQEPLPWAQSTGNQMSSRLMSMRSANGLLMLPPKTEQYVELHKGEVVDVMVIGRL	lcl|GPHN_184:90-1163_ORF1_GPHN_184:89:1162	['GPHN_184_ORF1']
GPHN_185	ORF1	633	68.64	GPHN	E40	CTGATAATTAACCTA	CTGATAATTAACCTACCTGGTAGCAAGAAAGGATCTCAGGAATGCTTTCAGTTCATACTGCCAGCTCTACCTCATGCCATTGACCTTTTACGTGATGCCATTGTAAAAGTAAAGGAGGTGCATGATGAACTTGAAGATTTACCTTCCCCACCACCTCCTCTCTCTCCACCTCCTACAACTAGCCCACATAAACAGACAGAAGACAAAGGAGTTCAGTGTGAAGAAGAGGAAGAAGAAAAGAAAGACAGTGGTGTAGCTTCAACAGAAGATAGTTCCTCATCACATATAACTGCAGCAGCTCTTGCTGCAAAGAAGCATCCATTCTACACCAGTCCTGCTCTTTTCATGGCAAATCATGGGCAGCCCATCCCTGGTCTCATCAGTTATTCCCATCATGCA…	MIINLPGSKKGSQECFQFILPALPHAIDLLRDAIVKVKEVHDELEDLPSPPPPLSPPPTTSPHKQTEDKGVQCEEEEEEKKDSGVASTEDSSSSHITAAALAAKKHPFYTSPALFMANHGQPIPGLISYSHHATGSADKRIPDSIISRGVQVLPRDTASLSTTPSESPRAQATSRLSTASCPTPKVQSRCSSKENILRASHSAVDITKVARRHRMSPFPLTSMDKAFITVLEMTPVLGTEIINYRDGMGRVLAQDVYAKDNLPPFPASVKDGYAVRAADGPGDRFIIGESQAGEQPTQTVMPGQVMRVTTGAPIPCGADAVVQVEDTELIRESDDGTEELEVRILVQARPGQDIRPIGHDIKRGECVLAKGTHMGPSEIGLLATVGVTEVEVNKFPVVA…	lcl|GPHN_185:100-2001_ORF1_GPHN_185:99:2000	['GPHN_185_ORF1']
	ORF2	100	11.18	unknown	PTC	CTGCAGCAGCTCTTG	CTGCAGCAGCTCTTGCTGCAAAGAAGCATCCATTCTACACCAGTCCTGCTCTTTTCATGGCAAATCATGGGCAGCCCATCCCTGGTCTCATCAGTTATTCCCATCATGCAACAGGCAGTGCAGATAAACGGATTCCAGACTCCATCATTTCTCGTGGTGTTCAGGTGCTCCCACGAGACACAGCCTCCCTTAGCACTACTCCTTCAGAATCGCCCCGTGCTCAGGCTACATCTCGCCTCTCTACAGCTTCTTGTCCAACACCAAAAGTCCAGTCCAGGTGCAGCAGCAAGGAGAACATTCTAA	MQQLLLQRSIHSTPVLLFSWQIMGSPSLVSSVIPIMQQAVQINGFQTPSFLVVFRCSHETQPPLALLLQNRPVLRLHLASLQLLVQHQKSSPGAAARRTF	lcl|GPHN_185:389-691_ORF2_GPHN_185:388:690	['GPHN_105_ORF2', 'GPHN_116_ORF1', 'GPHN_119_ORF1', 'GPHN_143_ORF2', 'GPHN_144_ORF2', 'GPHN_164_ORF1', 'GPHN_171_ORF2', 'GPHN_185_ORF2', 'GPHN_190_ORF2', 'GPHN_241_ORF2', 'GPHN_254_ORF2', 'GPHN_38_ORF2', 'GPHN_4_ORF2', 'GPHN_51_ORF2', 'GPHN_57_ORF2', 'GPHN_77_ORF2', 'GPHN_95_ORF1']
GPHN_186	ORF1	227	25.15	GPHN	E40	CTGCTAAATCCTGAA	CTGCTAAATCCTGAAGATGATCTCTTACCAGGAAAGATTCGGGACAGCAATCGATCAACACTTCTAGCAACAATTCAGGAACATGGTTACCCAACAATCAACCTGGGAATTGTAGGAGACAACCCAGATGACTTACTCAATGCCTTGAATGAGGGTATCAGCCGTGCTGATGTCATCATCACGTCAGGAGGTGTGTCCATGGGGGAAAAGGACTATCTCAAGCAGGTGCTGGACATTGATCTTCATGCTCAGATCCATTTTGGCAGAGTTTTTATGAAGCCAGGCTTGCCAACAACATTTGCAACTTTGGATATTGATGGTGTAAGAAAAATTATTTTTGCACTACCAGGGAATCCTGTATCAGCTGTGGTCACCTGCAACCTCTTTGTTGTACCTGCA…	MLNPEDDLLPGKIRDSNRSTLLATIQEHGYPTINLGIVGDNPDDLLNALNEGISRADVIITSGGVSMGEKDYLKQVLDIDLHAQIHFGRVFMKPGLPTTFATLDIDGVRKIIFALPGNPVSAVVTCNLFVVPALRKMQGILDPRPTIIKARLSCDVKLDPRPEYHRCILTWHHQEPLPWAQSTGNQMSSRLMSMRSANGLLMLPPKTEQYVELHKGEVVDVMVIGRL	lcl|GPHN_186:878-1561_ORF1_GPHN_186:877:1560	['GPHN_104_ORF2', 'GPHN_186_ORF1', 'GPHN_195_ORF3', 'GPHN_197_ORF2', 'GPHN_247_ORF1', 'GPHN_255_ORF1', 'GPHN_275_ORF2', 'GPHN_64_ORF1', 'GPHN_88_ORF1']
	ORF2	258	27.62	GPHN	PTC	ATGGCCCTGGCAATG	ATGGCCCTGGCAATGCTGATGGGATCGCTCAATGTCACACCTCTGGGCATGCTCTCTAGACCAGTGTGTGGAATAAGGGGGAAAACTCTGATAATTAACCTACCTGGTAGCAAGAAAGGATCTCAGATTCCAGACTCCATCATTTCTCGTGGTGTTCAGGTGCTCCCACGAGACACAGCCTCCCTTAGCACTACTCCTTCAGAATCGCCCCGTGCTCAGGCTACATCTCGCCTCTCTACAGCTTCTTGTCCAACACCAAAAGTCCAGTCCAGGTGCAGCAGCAAGGAGAACATTCTAAGAGCCAGTCACAGTGCTGTAGATATCACCAAGGTGGCTAGAAGACATCGCATGTCTCCTTTTCCCCTGACGTCTATGGACAAAGCCTTCATTACAGTCCTG…	MALAMLMGSLNVTPLGMLSRPVCGIRGKTLIINLPGSKKGSQIPDSIISRGVQVLPRDTASLSTTPSESPRAQATSRLSTASCPTPKVQSRCSSKENILRASHSAVDITKVARRHRMSPFPLTSMDKAFITVLEMTPVLGTEIINYRDGMGRVLAQDVYAKDNLPPFPASVKDGYAVRAADGPGDRFIIGESQAGEQPTQTVMPGQVMRVTTGAPIPCGADAVVQVEDTELIRESDDGTEELEVRILVQARPGQDIRC	lcl|GPHN_186:108-884_ORF2_GPHN_186:107:883	['GPHN_186_ORF2', 'GPHN_255_ORF2']
GPHN_187	ORF1	709	77.09	GPHN	E40	TTGGGTGGGACTATA	TTGGGTGGGACTATATCGGCATACAAGATAGTACCAGATGAAATAGAAGAAATCAAGGAAACACTCATAGACTGGTGTGATGAAAAGGAACTTAATTTAATATTAACAACTGGAGGAACGGGGTTTGCACCACGAGATGTCACTCCAGAGGCCACAAAAGAAGTAATAGAGCGGGAAGCGCCAGGGATGGCCCTGGCAATGCTGATGGGATCGCTCAATGTCACACCTCTGGGCATGCTCTCTAGACCAGTGTGTGGAATAAGGGGGAAAACTCTGATAATTAACCTACCTGGTAGCAAGAAAGGATCTCAGGAATGCTTTCAGTTCATACTGCCAGCTCTACCTCATGCCATTGACCTTTTACGTGATGCCATTGTAAAAGTAAAGGAGGTGCATGAT…	MGGTISAYKIVPDEIEEIKETLIDWCDEKELNLILTTGGTGFAPRDVTPEATKEVIEREAPGMALAMLMGSLNVTPLGMLSRPVCGIRGKTLIINLPGSKKGSQECFQFILPALPHAIDLLRDAIVKVKEVHDELEDLPSPPPPLSPPPTTSPHKQTEDKGVQCEEEEEEKKDSGVASTEDSSSSHITAAALAAKIPDSIISRGVQVLPRDTASLSTTPSESPRAQATSRLSTASCPTPKLHSRLEGLKDELWRNRGYDLRVQSRCSSKENILRASHSAVDITKVARRHRMSPFPLTSMDKAFITVLEMTPVLGTEIINYRDGMGRVLAQDVYAKDNLPPFPASVKDGYAVRAADGPGDRFIIGESQAGEQPTQTVMPGQVMRVTTGAPIPCGADAVVQ…	lcl|GPHN_187:73-2202_ORF1_GPHN_187:72:2201	['GPHN_187_ORF1']
GPHN_188	ORF1	527	56.96	GPHN	PTC	ATGGCGACCGAGGGA	ATGGCGACCGAGGGAATGATCCTCACCAACCACGACCATCAAATCCGTGTCGGAGTCCTCACAGTGAGTGATAGCTGCTTCAGGAATCTTGCAGAAGACCGCAGTGGGATAAATCTAAAAGATCTTGTCCAAGATCCTTCTTTGTTGGGTGGGACTATATCGGCATACAAGATAGTACCAGATGAAATAGAAGAAATCAAGGCCACAAAAGAAGTAATAGAGCGGGAAGCGCCAGGGATGGCCCTGGCAATGCTGATGGGATCGCTCAATGTCACACCTCTGGGCATGCTCTCTAGACCAGTGTGTGGAATAAGGGGGAAAACTCTGATAATTAACCTACCTGGTAGCAAGAAAGGATCTCAGATTCCAGACTCCATCATTTCTCGTGGTGTTCAGGTG…	MATEGMILTNHDHQIRVGVLTVSDSCFRNLAEDRSGINLKDLVQDPSLLGGTISAYKIVPDEIEEIKATKEVIEREAPGMALAMLMGSLNVTPLGMLSRPVCGIRGKTLIINLPGSKKGSQIPDSIISRGVQVLPRDTASLSTTPSESPRAQATSRLSTASCPTPKLHSRLEGLKDELWRNRGYDLRVQSRCSSKENILRASHSAVDITKVARRHRMSPFPLTSMDKAFITVLEMTPVLGTEIINYRDGMGRVLAQDVYAKDNLPPFPASVKDGYAVRAADGPGDRFIIGESQAGEQPTQTVMPGQVMRVTTGAPIPCGADAVVQVEDTELIRESDDGTEELEVRILVQARPGQDIRPIGHDIKRGECVLAKGTHMGPSEIGLLATVGVTEVEVNKFPV…	lcl|GPHN_188:8-1591_ORF1_GPHN_188:7:1590	['GPHN_188_ORF1']
GPHN_189	ORF1	632	67.97	GPHN	E40	ATGGCGACCGAGGGA	ATGGCGACCGAGGGAATGATCCTCACCAACCACGACCATCAAATCCGTGTCGGAGTCCTCACAGTGAGTGATAGCTGCTTCAGGAATCTTGCAGAAGACCGCAGTGGGATAAATCTAAAAGATCTTGTCCAAGATCCTTCTTTGTTGGGTGGGACTATATCGGCATACAAGATAGTACCAGATGAAATAGAAGAAATCAAGGCCACAAAAGAAGTAATAGAGCGGGAAGCGCCAGGGATGGCCCTGGCAATGCTGATGGGATCGCTCAATGTCACACCTCTGGGCATGCTCTCTAGACCAGTGTGTGGAATAAGGGGGAAAACTCTGATAATTAACCTACCTGGTAGCAAGAAAGGATCTCAGGAATGCTTTCAGTTCATACTGCCAGCTCTACCTCAT…	MATEGMILTNHDHQIRVGVLTVSDSCFRNLAEDRSGINLKDLVQDPSLLGGTISAYKIVPDEIEEIKATKEVIEREAPGMALAMLMGSLNVTPLGMLSRPVCGIRGKTLIINLPGSKKGSQECFQFILPALPHAIDLLRDAIVKVKEVHDELEDLPSPPPPLSPPPTTSPHKQTEDKGVQCEEEEEEKKDSGVASTEDSSSSHITAAALAAKIPDSIISRGVQVLPRDTASLSTTPSESPRAQATSRLSTASCPTPKVQSRCSSKENILRASHSAVDITKVARRHRMSPFPLTSMDKAFITVLEMTPVLGTEIINYRDGMGRVLAQDVYAKDNLPPFPASVKDGYAVRAADGPGDRFIIGESQAGEQPTQTVMPGQVMRVTTGAPIPCGADAVVQVEDT…	lcl|GPHN_189:8-1906_ORF1_GPHN_189:7:1905	['GPHN_189_ORF1']
GPHN_190	ORF1	668	71.89	GPHN	E40	ATGGCGACCGAGGGA	ATGGCGACCGAGGGAATGATCCTCACCAACCACGACCATCAAATCCGTGTCGGAGTCCTCACAGTGAGTGATAGCTGCTTCAGGAATCTTGCAGAAGACCGCAGTGGGATAAATCTAAAAGATCTTGTCCAAGATCCTTCTTTGTTGGGTGGGACTATATCGGCATACAAGATAGTACCAGATGAAATAGAAGAAATCAAGGCCACAAAAGAAGTAATAGAGCGGGAAGCGCCAGGGATGGCCCTGGCAATGCTGATGGGATCGCTCAATGTCACACCTCTGGGCATGCTCTCTAGACCAGTGTGTGGAATAAGGGGGAAAACTCTGATAATTAACCTACCTGGTAGCAAGAAAGGATCTCAGGAATGCTTTCAGTTCATACTGCCAGCTCTACCTCAT…	MATEGMILTNHDHQIRVGVLTVSDSCFRNLAEDRSGINLKDLVQDPSLLGGTISAYKIVPDEIEEIKATKEVIEREAPGMALAMLMGSLNVTPLGMLSRPVCGIRGKTLIINLPGSKKGSQECFQFILPALPHAIDLLRDAIVKVKEVHDELEDLPSPPPPLSPPPTTSPHKQTEDKGVQCEEEEEEKKDSGVASTEDSSSSHITAAALAAKKHPFYTSPALFMANHGQPIPGLISYSHHATGSADKRIPDSIISRGVQVLPRDTASLSTTPSESPRAQATSRLSTASCPTPKVQSRCSSKENILRASHSAVDITKVARRHRMSPFPLTSMDKAFITVLEMTPVLGTEIINYRDGMGRVLAQDVYAKDNLPPFPASVKDGYAVRAADGPGDRFIIGESQ…	lcl|GPHN_190:8-2014_ORF1_GPHN_190:7:2013	['GPHN_190_ORF1']
	ORF2	100	11.18	unknown	PTC	CTGCAGCAGCTCTTG	CTGCAGCAGCTCTTGCTGCAAAGAAGCATCCATTCTACACCAGTCCTGCTCTTTTCATGGCAAATCATGGGCAGCCCATCCCTGGTCTCATCAGTTATTCCCATCATGCAACAGGCAGTGCAGATAAACGGATTCCAGACTCCATCATTTCTCGTGGTGTTCAGGTGCTCCCACGAGACACAGCCTCCCTTAGCACTACTCCTTCAGAATCGCCCCGTGCTCAGGCTACATCTCGCCTCTCTACAGCTTCTTGTCCAACACCAAAAGTCCAGTCCAGGTGCAGCAGCAAGGAGAACATTCTAA	MQQLLLQRSIHSTPVLLFSWQIMGSPSLVSSVIPIMQQAVQINGFQTPSFLVVFRCSHETQPPLALLLQNRPVLRLHLASLQLLVQHQKSSPGAAARRTF	lcl|GPHN_190:621-923_ORF2_GPHN_190:620:922	['GPHN_105_ORF2', 'GPHN_116_ORF1', 'GPHN_119_ORF1', 'GPHN_143_ORF2', 'GPHN_144_ORF2', 'GPHN_164_ORF1', 'GPHN_171_ORF2', 'GPHN_185_ORF2', 'GPHN_190_ORF2', 'GPHN_241_ORF2', 'GPHN_254_ORF2', 'GPHN_38_ORF2', 'GPHN_4_ORF2', 'GPHN_51_ORF2', 'GPHN_57_ORF2', 'GPHN_77_ORF2', 'GPHN_95_ORF1']
GPHN_191	ORF1	473	51.3	GPHN	E40	ATGGCGACCGAGGGA	ATGGCGACCGAGGGAATGATCCTCACCAACCACGACCATCAAATCCGTGTCGGAGTCCTCACAGTGAGTGATAGCTGCTTCAGGAATCTTGCAGAAGACCGCAGTGGGATAAATCTAAAAGATCTTGTCCAAGATCCTTCTTTGTTGGGTGGGACTATATCGGCATACAAGATAGTACCAGATGAAATAGAAGAAATCAAGGAAACACTCATAGACTGGTGTGATGAAAAGGAACTTAATTTAATATTAACAACTGGAGGAACGGGGTTTGCACCACGAGATGTCACTCCAGAGGTCCAGTCCAGGTGCAGCAGCAAGGAGAACATTCTAAGAGCCAGTCACAGTGCTGTAGATATCACCAAGGTGGCTAGAAGACATCGCATGTCTCCTTTTCCCCTG…	MATEGMILTNHDHQIRVGVLTVSDSCFRNLAEDRSGINLKDLVQDPSLLGGTISAYKIVPDEIEEIKETLIDWCDEKELNLILTTGGTGFAPRDVTPEVQSRCSSKENILRASHSAVDITKVARRHRMSPFPLTSMDKAFITVLEMTPVLGTEIINYRDGMGRVLAQDVYAKDNLPPFPASVKDGYAVRAADGPGDRFIIGESQAGEQPTQTVMPGQVMRVTTGAPIPCGADAVVQVEDTELIRESDDGTEELEVRILVQARPGQDIRPIGHDIKRGECVLAKGTHMGPSEIGLLATVGVTEVEVNKFPVVAVMSTGNELLNPEDDLLPGKIRDSNRSTLLATIQEHGYPTINLGIVGDNPDDLLNALNEGISRADVIITSGGVSMGEKDYLKQVLDID…	lcl|GPHN_191:8-1429_ORF1_GPHN_191:7:1428	['GPHN_191_ORF1']
GPHN_192	ORF1	110	12.12	GPHN	PTC	ATGGCGACCGAGGGA	ATGGCGACCGAGGGAATGATCCTCACCAACCACGACCATCAAATCCGTGTCGGAGTCCTCACAGTGAGTGATAGCTGCTTCAGGAATCTTGCAGAAGACCGCAGTGGGATAAATCTAAAAGATCTTGTCCAAGATCCTTCTTTGTTGGGTGGGACTATATCGGCATACAAGATAGTACCAGATGAAATAGAAGAAATCAAGGAAACACTCATAGACTGGTGTGATGAAAAGGAACTTAATTTAATATTAACAACTGGAGGAACGGGGTTTGCACCACGAGATGTCACTCCAGAGACCAGTGTGTGGAATAAGGGGGAAAACTCTGATAATTAA	MATEGMILTNHDHQIRVGVLTVSDSCFRNLAEDRSGINLKDLVQDPSLLGGTISAYKIVPDEIEEIKETLIDWCDEKELNLILTTGGTGFAPRDVTPETSVWNKGENSDN	lcl|GPHN_192:8-340_ORF1_GPHN_192:7:339	['GPHN_160_ORF2', 'GPHN_164_ORF2', 'GPHN_174_ORF1', 'GPHN_192_ORF1', 'GPHN_62_ORF1']
	ORF2	419	45.61	GPHN	E40	ATGTCTCCTTTTCCC	ATGTCTCCTTTTCCCCTGACGTCTATGGACAAAGCCTTCATTACAGTCCTGGAGATGACTCCGGTGCTTGGTACAGAAATCATCAATTACCGAGATGGAATGGGGCGAGTCCTTGCTCAAGATGTATATGCAAAAGACAACCTACCCCCATTCCCTGCATCAGTAAAAGATGGCTATGCTGTTCGAGCTGCTGATGGTCCAGGGGATCGTTTCATCATTGGGGAATCCCAAGCTGGTGAGCAGCCAACTCAGACAGTAATGCCAGGACAAGTGATGCGGGTTACAACAGGTGCTCCAATCCCCTGCGGTGCTGATGCAGTAGTGCAAGTTGAAGATACTGAACTCATCAGGGAATCAGATGATGGTACTGAAGAACTTGAAGTACGAATTCTGGTGCAA…	MSPFPLTSMDKAFITVLEMTPVLGTEIINYRDGMGRVLAQDVYAKDNLPPFPASVKDGYAVRAADGPGDRFIIGESQAGEQPTQTVMPGQVMRVTTGAPIPCGADAVVQVEDTELIRESDDGTEELEVRILVQARPGQDIRPIGHDIKRGECVLAKGTHMGPSEIGLLATVGVTEVEVNKFPVVAVMSTGNELLNPEDDLLPGKIRDSNRSTLLATIQEHGYPTINLGIVGDNPDDLLNALNEGISRADVIITSGGVSMGEKDYLKQVLDIDLHAQIHFGRVFMKPGLPTTFATLDIDGVRKIIFALPGNPVSAVVTCNLFVVPALRKMQGILDPRPTIIKARLSCDVKLDPRPEYHRCILTWHHQEPLPWAQSTGNQMSSRLMSMRSANGLLMLPPKT…	lcl|GPHN_192:887-2146_ORF2_GPHN_192:886:2145	['GPHN_110_ORF1', 'GPHN_15_ORF1', 'GPHN_173_ORF1', 'GPHN_192_ORF2', 'GPHN_209_ORF3', 'GPHN_227_ORF2', 'GPHN_228_ORF2', 'GPHN_257_ORF1', 'GPHN_264_ORF2', 'GPHN_265_ORF2', 'GPHN_268_ORF2', 'GPHN_30_ORF1', 'GPHN_36_ORF1', 'GPHN_52_ORF1', 'GPHN_80_ORF2']
	ORF3	132	14.37	GPHN	PTC	CTGGAGGAACGGGGT	CTGGAGGAACGGGGTTTGCACCACGAGATGTCACTCCAGAGACCAGTGTGTGGAATAAGGGGGAAAACTCTGATAATTAACCTACCTGGTAGCAAGAAAGGATCTCAGGAATGCTTTCAGTTCATACTGCCAGCTCTACCTCATGCCATTGACCTTTTACGTGATGCCATTGTAAAAGTAAAGGAGGTGCATGATGAACTTGAAGATTTACCTTCCCCACCACCTCCTCTCTCTCCACCTCCTACAACTAGCCCACATAAACAGACAGAAGACAAAGGAGTTCAGTGTGAAGAAGAGGAAGAAGAAAAGAAAGACAGTGGTGTAGCTTCAACAGAAGATAGTTCCTCATCACATATAACTGCAGCAGCTCTTGCTGCAAAGTTGACCAACTTTAGTTAA	MEERGLHHEMSLQRPVCGIRGKTLIINLPGSKKGSQECFQFILPALPHAIDLLRDAIVKVKEVHDELEDLPSPPPPLSPPPTTSPHKQTEDKGVQCEEEEEEKKDSGVASTEDSSSSHITAAALAAKLTNFS	lcl|GPHN_192:261-659_ORF3_GPHN_192:260:658	['GPHN_192_ORF3']
GPHN_193	ORF1	546	59.41	GPHN	E40	ATGGCGACCGAGGGA	ATGGCGACCGAGGGAATGATCCTCACCAACCACGACCATCAAATCCGTGTCGGAGTCCTCACAGTGAGTGATAGCTGCTTCAGGAATCTTGCAGAAGACCGCAGTGGGATAAATCTAAAAGATCTTGTCCAAGATCCTTCTTTGTTGGGTGGGACTATATCGGCATACAAGATAGTACCAGATGAAATAGAAGAAATCAAGGAAACACTCATAGACTGGTGTGATGAAAAGGAACTTAATTTAATATTAACAACTGGAGGAACGGGGTTTGCACCACGAGATGTCACTCCAGAGGCCACAAAAGAAGTAATAGAGCGGGAAGCGCCAGGGATGGCCCTGGCAATGCTGATGGGATCGCTCAATGTCACACCTCTGGGCATGCTCTCTAGACCAGTGTGT…	MATEGMILTNHDHQIRVGVLTVSDSCFRNLAEDRSGINLKDLVQDPSLLGGTISAYKIVPDEIEEIKETLIDWCDEKELNLILTTGGTGFAPRDVTPEATKEVIEREAPGMALAMLMGSLNVTPLGMLSRPVCGIRGKTLIINLPGSKKGSQVQSRCSSKENILRASHSAVDITKVARRHRMSPFPLTSMDKAFITVLEMTPVLGTEIINYRDGMGRVLAQDVYAKDNLPPFPASVKDGYAVRAADGPGDRFIIGESQAGEQPTQTVMPGQVMRVTTGAPIPCGADAVVQVEDTELIRESDDGTEELEVRILVQARPGQDIRPIGHDIKRGECVLAKGTHMGPSEIGLLATVGVTEVEVNKFPVVAVMSTGNELLNPEDDLLPGKIRDSNRSTLLATIQ…	lcl|GPHN_193:8-1648_ORF1_GPHN_193:7:1647	['GPHN_193_ORF1']
GPHN_194	ORF1	583	62.91	GPHN	PTC	ATGGCGACCGAGGGA	ATGGCGACCGAGGGAATGATCCTCACCAACCACGACCATCAAATCCGTGTCGGAGTCCTCACAGTGAGTGATAGCTGCTTCAGGAATCTTGCAGAAGACCGCAGTGGGATAAATCTAAAAGATCTTGTCCAAGATCCTTCTTTGTTGGGTGGGACTATATCGGCATACAAGATAGTACCAGATGAAATAGAAGAAATCAAGGAAACACTCATAGACTGGTGTGATGAAAAGGAACTTAATTTAATATTAACAACTGGAGGAACGGGGTTTGCACCACGAGATGTCACTCCAGAGGCCACAAAAGAAGTAATAGAGCGGGAAGCGCCAGGGATGGCCCTGGCAATGCTGATGGGATCGCTCAATGTCACACCTCTGGGCATGCTCTCTAGACCAGTGTGT…	MATEGMILTNHDHQIRVGVLTVSDSCFRNLAEDRSGINLKDLVQDPSLLGGTISAYKIVPDEIEEIKETLIDWCDEKELNLILTTGGTGFAPRDVTPEATKEVIEREAPGMALAMLMGSLNVTPLGMLSRPVCGIRGKTLIINLPGSKKGSQECFQFILPALPHAIDLLRDAIVKVKEVHDELEDLPSPPPPLSPPPTTSPHKQTEDKGVQCEEEEEEKKDSGVASTEDSSSSHITAAALAAKVQSRCSSKENILRASHSAVDITKVARRHRMSPFPLTSMDKAFITVLEMTPVLGTEIINYRDGMGRVLAQDVYAKDNLPPFPASVKDGYAVRAADGPGDRFIIGESQAGEQPTQTVMPGQVMRVTTGAPIPCGADAVVQVEDTELIRESDDGTEELE…	lcl|GPHN_194:8-1759_ORF1_GPHN_194:7:1758	['GPHN_194_ORF1']
GPHN_195	ORF1	162	17.6	GPHN	PTC	TTGTCCAACACCAAA	TTGTCCAACACCAAAAGTCACAGTGCTGTAGATATCACCAAGGTGGCTAGAAGACATCGCATGTCTCCTTTTCCCCTGACGTCTATGGACAAAGCCTTCATTACAGTCCTGGAGATGACTCCGGTGCTTGGTACAGAAATCATCAATTACCGAGATGGAATGGGGCGAGTCCTTGCTCAAGATGTATATGCAAAAGACAACCTACCCCCATTCCCTGCATCAGTAAAAGATGGCTATGCTGTTCGAGCTGCTGATGGTCCAGGGGATCGTTTCATCATTGGGGAATCCCAAGCTGGTGAGCAGCCAACTCAGACAGTAATGCCAGGACAAGTGATGCGGGTTACAACAGGTGCTCCAATCCCCTGCGGTGCTGATGCAGTAGTGCAAGTTGAAGATACT…	MSNTKSHSAVDITKVARRHRMSPFPLTSMDKAFITVLEMTPVLGTEIINYRDGMGRVLAQDVYAKDNLPPFPASVKDGYAVRAADGPGDRFIIGESQAGEQPTQTVMPGQVMRVTTGAPIPCGADAVVQVEDTELIRESDDGTEELEVRILVQARPGQDIRC	lcl|GPHN_195:856-1344_ORF1_GPHN_195:855:1343	['GPHN_195_ORF1']
	ORF2	292	31.29	GPHN	PTC	ATGGCGACCGAGGGA	ATGGCGACCGAGGGAATGATCCTCACCAACCACGACCATCAAATCCGTGTCGGAGTCCTCACAGTGAGTGATAGCTGCTTCAGGAATCTTGCAGAAGACCGCAGTGGGATAAATCTAAAAGATCTTGTCCAAGATCCTTCTTTGTTGGGTGGGACTATATCGGCATACAAGATAGTACCAGATGAAATAGAAGAAATCAAGGAAACACTCATAGACTGGTGTGATGAAAAGGAACTTAATTTAATATTAACAACTGGAGGAACGGGGTTTGCACCACGAGATGTCACTCCAGAGGCCACAAAAGAAGTAATAGAGCGGGAAGCGCCAGGGATGGCCCTGGCAATGCTGATGGGATCGCTCAATGTCACACCTCTGGGCATGCTCTCTAGACCAGTGTGT…	MATEGMILTNHDHQIRVGVLTVSDSCFRNLAEDRSGINLKDLVQDPSLLGGTISAYKIVPDEIEEIKETLIDWCDEKELNLILTTGGTGFAPRDVTPEATKEVIEREAPGMALAMLMGSLNVTPLGMLSRPVCGIRGKTLIINLPGSKKGSQECFQFILPALPHAIDLLRDAIVKVKEVHDELEDLPSPPPPLSPPPTTSPHKQTEDKGVQCEEEEEEKKDSGVASTEDSSSSHITAAALAAKIPDSIISRGVQVLPRDTASLSTTPSESPRAQATSRLSTASCPTPKVTVL	lcl|GPHN_195:8-886_ORF2_GPHN_195:7:885	['GPHN_17_ORF2', 'GPHN_195_ORF2']
	ORF3	227	25.15	GPHN	E40	CTGCTAAATCCTGAA	CTGCTAAATCCTGAAGATGATCTCTTACCAGGAAAGATTCGGGACAGCAATCGATCAACACTTCTAGCAACAATTCAGGAACATGGTTACCCAACAATCAACCTGGGAATTGTAGGAGACAACCCAGATGACTTACTCAATGCCTTGAATGAGGGTATCAGCCGTGCTGATGTCATCATCACGTCAGGAGGTGTGTCCATGGGGGAAAAGGACTATCTCAAGCAGGTGCTGGACATTGATCTTCATGCTCAGATCCATTTTGGCAGAGTTTTTATGAAGCCAGGCTTGCCAACAACATTTGCAACTTTGGATATTGATGGTGTAAGAAAAATTATTTTTGCACTACCAGGGAATCCTGTATCAGCTGTGGTCACCTGCAACCTCTTTGTTGTACCTGCA…	MLNPEDDLLPGKIRDSNRSTLLATIQEHGYPTINLGIVGDNPDDLLNALNEGISRADVIITSGGVSMGEKDYLKQVLDIDLHAQIHFGRVFMKPGLPTTFATLDIDGVRKIIFALPGNPVSAVVTCNLFVVPALRKMQGILDPRPTIIKARLSCDVKLDPRPEYHRCILTWHHQEPLPWAQSTGNQMSSRLMSMRSANGLLMLPPKTEQYVELHKGEVVDVMVIGRL	lcl|GPHN_195:1338-2021_ORF3_GPHN_195:1337:2020	['GPHN_104_ORF2', 'GPHN_186_ORF1', 'GPHN_195_ORF3', 'GPHN_197_ORF2', 'GPHN_247_ORF1', 'GPHN_255_ORF1', 'GPHN_275_ORF2', 'GPHN_64_ORF1', 'GPHN_88_ORF1']
GPHN_196	ORF1	123	13.19	GPHN	PTC	ATGGCGACCGAGGGA	ATGGCGACCGAGGGAATGATCCTCACCAACCACGACCATCAAATCCGTGTCGGAGTCCTCACAGTGAGTGATAGCTGCTTCAGGAATCTTGCAGAAGACCGCAGTGGGATAAATCTAAAAGATCTTGTCCAAGATCCTTCTTTGTTGGGTGGGACTATATCGGCATACAAGATAGTACCAGATGAAATAGAAGAAATCAAGGCCACAAAAGAAGTAATAGAGCGGGAAGCGCCAGGGATGGCCCTGGCAATGCTGATGGGATCGCTCAATGTCACACCTCTGGGCATGCTCTCTAGACCAGTGTGTGGAATAAGGGGGAAAACTCTGATAATTAACCTACCTGGTAGCAAGAAAGGATCTCAGCCCACATAA	MATEGMILTNHDHQIRVGVLTVSDSCFRNLAEDRSGINLKDLVQDPSLLGGTISAYKIVPDEIEEIKATKEVIEREAPGMALAMLMGSLNVTPLGMLSRPVCGIRGKTLIINLPGSKKGSQPT	lcl|GPHN_196:8-379_ORF1_GPHN_196:7:378	['GPHN_196_ORF1']
	ORF2	544	59.01	GPHN	E40	CTGGTAGCAAGAAAG	CTGGTAGCAAGAAAGGATCTCAGCCCACATAAACAGACAGAAGACAAAGGAGTTCAGTGTGAAGAAGAGGAAGAAGAAAAGAAAGACAGTGGTGTAGCTTCAACAGAAGATAGTTCCTCATCACATATAACTGCAGCAGCTCTTGCTGCAAAGATTCCAGACTCCATCATTTCTCGTGGTGTTCAGGTGCTCCCACGAGACACAGCCTCCCTTAGCACTACTCCTTCAGAATCGCCCCGTGCTCAGGCTACATCTCGCCTCTCTACAGCTTCTTGTCCAACACCAAAAGTCCAGTCCAGGTGCAGCAGCAAGGAGAACATTCTAAGAGCCAGTCACAGTGCTGTAGATATCACCAAGGTGGCTAGAAGACATCGCATGTCTCCTTTTCCCCTGACGTCT…	MVARKDLSPHKQTEDKGVQCEEEEEEKKDSGVASTEDSSSSHITAAALAAKIPDSIISRGVQVLPRDTASLSTTPSESPRAQATSRLSTASCPTPKVQSRCSSKENILRASHSAVDITKVARRHRMSPFPLTSMDKAFITVLEMTPVLGTEIINYRDGMGRVLAQDVYAKDNLPPFPASVKDGYAVRAADGPGDRFIIGESQAGEQPTQTVMPGQVMRVTTGAPIPCGADAVVQVEDTELIRESDDGTEELEVRILVQARPGQDIRPIGHDIKRGECVLAKGTHMGPSEIGLLATVGVTEVEVNKFPVVAVMSTGNELLNPEDDLLPGKIRDSNRSTLLATIQEHGYPTINLGIVGDNPDDLLNALNEGISRADVIITSGGVSMGEKDYLKQVLDIDLH…	lcl|GPHN_196:348-1982_ORF2_GPHN_196:347:1981	['GPHN_160_ORF1', 'GPHN_166_ORF1', 'GPHN_183_ORF2', 'GPHN_196_ORF2', 'GPHN_261_ORF2', 'GPHN_55_ORF2']
GPHN_197	ORF1	463	49.85	GPHN	PTC	ATGGCGACCGAGGGA	ATGGCGACCGAGGGAATGATCCTCACCAACCACGACCATCAAATCCGTGTCGGAGTCCTCACAGTGAGTGATAGCTGCTTCAGGAATCTTGCAGAAGACCGCAGTGGGATAAATCTAAAAGATCTTGTCCAAGATCCTTCTTTGTTGGGTGGGACTATATCGGCATACAAGATAGTACCAGATGAAATAGAAGAAATCAAGGAAACACTCATAGACTGGTGTGATGAAAAGGAACTTAATTTAATATTAACAACTGGAGGAACGGGGTTTGCACCACGAGATGTCACTCCAGAGGCCACAAAAGAAGTAATAGAGCGGGAAGCGCCAGGGATGGCCCTGGCAATGCTGATGGGATCGCTCAATGTCACACCTCTGGGCATGCTCTCTAGACCAGTGTGT…	MATEGMILTNHDHQIRVGVLTVSDSCFRNLAEDRSGINLKDLVQDPSLLGGTISAYKIVPDEIEEIKETLIDWCDEKELNLILTTGGTGFAPRDVTPEATKEVIEREAPGMALAMLMGSLNVTPLGMLSRPVCGIRGKTLIINLPGSKKGSQECFQFILPALPHAIDLLRDAIVKVKEVHDELEDLPSPPPPLSPPPTTSPHKQTEDKGVQCEEEEEEKKDSGVASTEDSSSSHITAAALAAKIPDSIISRGVQVLPRDTASLSTTPSESPRAQATSRLSTASCPTPKVQSRCSSKENILRASHSAVDITKVARRHRMSPFPLTSMDKAFITVLEMTPVLGTEIINYRDGMGRVLAQDVYAKDNLPPFPASVKDGYAVRAADGPGDRFIIGESQAGEQP…	lcl|GPHN_197:8-1399_ORF1_GPHN_197:7:1398	['GPHN_197_ORF1']
	ORF2	227	25.15	GPHN	E40	CTGCTAAATCCTGAA	CTGCTAAATCCTGAAGATGATCTCTTACCAGGAAAGATTCGGGACAGCAATCGATCAACACTTCTAGCAACAATTCAGGAACATGGTTACCCAACAATCAACCTGGGAATTGTAGGAGACAACCCAGATGACTTACTCAATGCCTTGAATGAGGGTATCAGCCGTGCTGATGTCATCATCACGTCAGGAGGTGTGTCCATGGGGGAAAAGGACTATCTCAAGCAGGTGCTGGACATTGATCTTCATGCTCAGATCCATTTTGGCAGAGTTTTTATGAAGCCAGGCTTGCCAACAACATTTGCAACTTTGGATATTGATGGTGTAAGAAAAATTATTTTTGCACTACCAGGGAATCCTGTATCAGCTGTGGTCACCTGCAACCTCTTTGTTGTACCTGCA…	MLNPEDDLLPGKIRDSNRSTLLATIQEHGYPTINLGIVGDNPDDLLNALNEGISRADVIITSGGVSMGEKDYLKQVLDIDLHAQIHFGRVFMKPGLPTTFATLDIDGVRKIIFALPGNPVSAVVTCNLFVVPALRKMQGILDPRPTIIKARLSCDVKLDPRPEYHRCILTWHHQEPLPWAQSTGNQMSSRLMSMRSANGLLMLPPKTEQYVELHKGEVVDVMVIGRL	lcl|GPHN_197:1448-2131_ORF2_GPHN_197:1447:2130	['GPHN_104_ORF2', 'GPHN_186_ORF1', 'GPHN_195_ORF3', 'GPHN_197_ORF2', 'GPHN_247_ORF1', 'GPHN_255_ORF1', 'GPHN_275_ORF2', 'GPHN_64_ORF1', 'GPHN_88_ORF1']
GPHN_198	ORF1	483	52.3	GPHN	PTC	ATGGCGACCGAGGGA	ATGGCGACCGAGGGAATGATCCTCACCAACCACGACCATCAAATCCGTGTCGGAGTCCTCACAGTGAGTGATAGCTGCTTCAGGAATCTTGCAGAAGACCGCAGTGGGATAAATCTAAAAGATCTTGTCCAAGATCCTTCTTTGTTGGGTGGGACTATATCGGCATACAAGATAGTACCAGATGAAATAGAAGAAATCAAGGAAACACTCATAGACTGGTGTGATGAAAAGGAACTTAATTTAATATTAACAACTGGAGGAACGGGGTTTGCACCACGAGATGTCACTCCAGAGGCCACAAAAGAAGTAATAGAGCGGGAAGCGCCAGGGATGGCCCTGGCAATGCTGATGGGATCGCTCAATGTCACACCTCTGGGCATGCTCTCTAGACCAGTGTGT…	MATEGMILTNHDHQIRVGVLTVSDSCFRNLAEDRSGINLKDLVQDPSLLGGTISAYKIVPDEIEEIKETLIDWCDEKELNLILTTGGTGFAPRDVTPEATKEVIEREAPGMALAMLMGSLNVTPLGMLSRPVCGIRGKTLIINLPGSKKGSQECFQFILPALPHAIDLLRDAIVKVKEVHDELEDLPSPPPPLSPPPTTSPHKQTEDKGVQCEEEEEEKKDSGVASTEDSSSSHITAAALAAKIPDSIISRGVQVLPRDTASLSTTPSESPRAQATSRLSTASCPTPKARLPSCSSTYSVSELHSRLEGLKDELWRNRGYDLRVQSRCSSKENILRASHSAVDITKVARRHRMSPFPLTSMDKAFITVLEMTPVLGTEIINYRDGMGRVLAQDVYAKDN…	lcl|GPHN_198:8-1459_ORF1_GPHN_198:7:1458	['GPHN_198_ORF1']
	ORF2	144	16.12	GPHN	E40	TTGAAGATACTGAAC	TTGAAGATACTGAACTCATCAGGGAATCAGATGATCTTGCCAACAACATTTGCAACTTTGGATATTGATGGTGTAAGAAAAATTATTTTTGCACTACCAGGGAATCCTGTATCAGCTGTGGTCACCTGCAACCTCTTTGTTGTACCTGCACTGAGAAAGATGCAGGGTATCTTGGATCCTCGGCCAACCATCATCAAAGCCAGGTTATCGTGTGATGTAAAACTGGACCCTCGCCCAGAATACCACCGGTGTATACTGACTTGGCATCACCAAGAACCACTGCCCTGGGCCCAGAGTACAGGTAATCAGATGAGCAGCCGTCTGATGAGCATGCGCAGTGCCAATGGATTATTGATGCTACCTCCAAAGACAGAGCAGTACGTGGAACTTCACAAAGGC…	MKILNSSGNQMILPTTFATLDIDGVRKIIFALPGNPVSAVVTCNLFVVPALRKMQGILDPRPTIIKARLSCDVKLDPRPEYHRCILTWHHQEPLPWAQSTGNQMSSRLMSMRSANGLLMLPPKTEQYVELHKGEVVDVMVIGRL	lcl|GPHN_198:1392-1826_ORF2_GPHN_198:1391:1825	['GPHN_198_ORF2']
GPHN_199	ORF1	289	31.66	GPHN	E40	CTGGTGCAAGCTCGG	CTGGTGCAAGCTCGGCCAGGCCAAGATATCCGACCCATCGGCCATGACATTAAGAGAGGGGAGTGTGTTTTGGCCAAAGGAACCCATATGGGCCCTTCAGAGATTGGTCTCCTTGCAACTGTGGGTGTCACAGAAGTGGAAGTTAATAAGTTTCCAGTGGTTGCCGTTATGTCAACAGGGAATGAGCTGCTAAATCCTGAAGATGATCTCTTACCAGGAAAGATTCGGGACAGCAATCGATCAACACTTCTAGCAACAATTCAGGAACATGGTTACCCAACAATCAACCTGGGAATTGTAGGAGACAACCCAGATGACTTACTCAATGCCTTGAATGAGGGTATCAGCCGTGCTGATGTCATCATCACGTCAGGAGGTGTGTCCATGGGGGAAAAGGAC…	MVQARPGQDIRPIGHDIKRGECVLAKGTHMGPSEIGLLATVGVTEVEVNKFPVVAVMSTGNELLNPEDDLLPGKIRDSNRSTLLATIQEHGYPTINLGIVGDNPDDLLNALNEGISRADVIITSGGVSMGEKDYLKQVLDIDLHAQIHFGRVFMKPGLPTTFATLDIDGVRKIIFALPGNPVSAVVTCNLFVVPALRKMQGILDPRPTIIKARLSCDVKLDPRPEYHRCILTWHHQEPLPWAQSTGNQMSSRLMSMRSANGLLMLPPKTEQYVELHKGEVVDVMVIGRL	lcl|GPHN_199:1042-1911_ORF1_GPHN_199:1041:1910	['GPHN_155_ORF1', 'GPHN_199_ORF1']
	ORF2	321	34.59	GPHN	PTC	ATGGCGACCGAGGGA	ATGGCGACCGAGGGAATGATCCTCACCAACCACGACCATCAAATCCGTGTCGGAGTCCTCACAGTGAGTGATAGCTGCTTCAGGAATCTTGCAGAAGACCGCAGTGGGATAAATCTAAAAGATCTTGTCCAAGATCCTTCTTTGTTGGGTGGGACTATATCGGCATACAAGATAGTACCAGATGAAATAGAAGAAATCAAGGAAACACTCATAGACTGGTGTGATGAAAAGGAACTTAATTTAATATTAACAACTGGAGGAACGGGGTTTGCACCACGAGATGTCACTCCAGAGGCCACAAAAGAAGTAATAGAGCGGGAAGCGCCAGGGATGGCCCTGGCAATGCTGATGGGATCGCTCAATGTCACACCTCTGGGCATGCTCTCTAGACCAGTGTGT…	MATEGMILTNHDHQIRVGVLTVSDSCFRNLAEDRSGINLKDLVQDPSLLGGTISAYKIVPDEIEEIKETLIDWCDEKELNLILTTGGTGFAPRDVTPEATKEVIEREAPGMALAMLMGSLNVTPLGMLSRPVCGIRGKTLIINLPGSKKGSQECFQFILPALPHAIDLLRDAIVKVKEVHDELEDLPSPPPPLSPPPTTSPHKQTEDKGVQCEEEEEEKKDSGVASTEDSSSSHITAAALAAKIPDSIISRGVQVLPRDTASLSTTPSESPRAQATSRLSTASCPTPKQIRRPDESKGVASRVGSLKYLLSLGDFVHKTFK	lcl|GPHN_199:8-973_ORF2_GPHN_199:7:972	['GPHN_199_ORF2']
GPHN_200	ORF1	726	79.2	GPHN	E40	ATGGCGACCGAGGGA	ATGGCGACCGAGGGAATGATCCTCACCAACCACGACCATCAAATCCGTGTCGGAGTCCTCACAGTGAGTGATAGCTGCTTCAGGAATCTTGCAGAAGACCGCAGTGGGATAAATCTAAAAGATCTTGTCCAAGATCCTTCTTTGTTGGGTGGGACTATATCGGCATACAAGATAGTACCAGATGAAATAGAAGAAATCAAGGAAACACTCATAGACTGGTGTGATGAAAAGGAACTTAATTTAATATTAACAACTGGAGGAACGGGGTTTGCACCACGAGATGTCACTCCAGAGAAATTCCCAACATTCCCATTTTGTGGGCTCCAGAAAGGGGCCACAAAAGAAGTAATAGAGCGGGAAGCGCCAGGGATGGCCCTGGCAATGCTGATGGGATCGCTC…	MATEGMILTNHDHQIRVGVLTVSDSCFRNLAEDRSGINLKDLVQDPSLLGGTISAYKIVPDEIEEIKETLIDWCDEKELNLILTTGGTGFAPRDVTPEKFPTFPFCGLQKGATKEVIEREAPGMALAMLMGSLNVTPLGMLSRPVCGIRGKTLIINLPGSKKGSQIPDSIISRGVQVLPRDTASLSTTPSESPRAQATSRLSTASCPTPKQIRRPDESKGVASRVGSLKYLLSLGDFVHKTFKARLPSCSSTYSVSELHSRLEGLKDELWRNRGYDLRVQSRCSSKENILRASHSAVDITKVARRHRMSPFPLTSMDKAFITVLEMTPVLGTEIINYRDGMGRVLAQDVYAKDNLPPFPASVKDGYAVRAADGPGDRFIIGESQAGEQPTQTVMPGQVM…	lcl|GPHN_200:8-2188_ORF1_GPHN_200:7:2187	['GPHN_200_ORF1']
	ORF2	119	13.86	unknown	PTC	CTGGTAGCAAGAAAG	CTGGTAGCAAGAAAGGATCTCAGATTCCAGACTCCATCATTTCTCGTGGTGTTCAGGTGCTCCCACGAGACACAGCCTCCCTTAGCACTACTCCTTCAGAATCGCCCCGTGCTCAGGCTACATCTCGCCTCTCTACAGCTTCTTGTCCAACACCAAAACAAATTAGACGGCCGGATGAAAGCAAAGGAGTTGCTAGTAGAGTTGGATCCCTCAAATATCTATTATCACTGGGAGATTTTGTACATAAAACATTTAAGGCTCGGCTTCCGTCGTGCTCATCTACCTATAGTGTATCTGAGCTCCACTCTAGATTGGAAGGGCTTAAAGATGAACTCTGGAGGAATAGAGGCTACGACTTAA	MVARKDLRFQTPSFLVVFRCSHETQPPLALLLQNRPVLRLHLASLQLLVQHQNKLDGRMKAKELLVELDPSNIYYHWEILYIKHLRLGFRRAHLPIVYLSSTLDWKGLKMNSGGIEATT	lcl|GPHN_200:480-839_ORF2_GPHN_200:479:838	['GPHN_123_ORF2', 'GPHN_130_ORF2', 'GPHN_200_ORF2', 'GPHN_249_ORF2', 'GPHN_252_ORF2']
GPHN_201	ORF1	365	39.47	GPHN	PTC	ATGGCGACCGAGGGA	ATGGCGACCGAGGGAATGATCCTCACCAACCACGACCATCAAATCCGTGTCGGAGTCCTCACAGTGAGTGATAGCTGCTTCAGGAATCTTGCAGAAGACCGCAGTGGGATAAATCTAAAAGATCTTGTCCAAGATCCTTCTTTGTTGGGTGGGACTATATCGGCATACAAGATAGTACCAGATGAAATAGAAGAAATCAAGGAAACACTCATAGACTGGTGTGATGAAAAGGAACTTAATTTAATATTAACAACTGGAGGAACGGGGTTTGCACCACGAGATGTCACTCCAGAGAAATTCCCAACATTCCCATTTTGTGGGCTCCAGAAAGGGGCCACAAAAGAAGTAATAGAGCGGGAAGCGCCAGGGATGGCCCTGGCAATGCTGATGGGATCGCTC…	MATEGMILTNHDHQIRVGVLTVSDSCFRNLAEDRSGINLKDLVQDPSLLGGTISAYKIVPDEIEEIKETLIDWCDEKELNLILTTGGTGFAPRDVTPEKFPTFPFCGLQKGATKEVIEREAPGMALAMLMGSLNVTPLGMLSRPVCGIRGKTLIINLPGSKKGSQECFQFILPALPHAIDLLRDAIVKVKEVHDELEDLPSPPPPLSPPPTTSPHKQTEDKGVQCEEEEEEKKDSGVASTEDSSSSHITAAALAAKIPDSIISRGVQVLPRDTASLSTTPSESPRAQATSRLSTASCPTPKVQSRCSSKENILRASHSAVDITKVARRHRMSPFPLTSMDKAFITVLEMTPVLGTEIINYRAAKS	lcl|GPHN_201:8-1105_ORF1_GPHN_201:7:1104	['GPHN_201_ORF1']
	ORF2	236	26.14	GPHN	E40	TTGGTACAGAAATCA	TTGGTACAGAAATCATCAATTACCGAGCTGCTAAATCCTGAAGATGATCTCTTACCAGGAAAGATTCGGGACAGCAATCGATCAACACTTCTAGCAACAATTCAGGAACATGGTTACCCAACAATCAACCTGGGAATTGTAGGAGACAACCCAGATGACTTACTCAATGCCTTGAATGAGGGTATCAGCCGTGCTGATGTCATCATCACGTCAGGAGGTGTGTCCATGGGGGAAAAGGACTATCTCAAGCAGGTGCTGGACATTGATCTTCATGCTCAGATCCATTTTGGCAGAGTTTTTATGAAGCCAGGCTTGCCAACAACATTTGCAACTTTGGATATTGATGGTGTAAGAAAAATTATTTTTGCACTACCAGGGAATCCTGTATCAGCTGTGGTC…	MVQKSSITELLNPEDDLLPGKIRDSNRSTLLATIQEHGYPTINLGIVGDNPDDLLNALNEGISRADVIITSGGVSMGEKDYLKQVLDIDLHAQIHFGRVFMKPGLPTTFATLDIDGVRKIIFALPGNPVSAVVTCNLFVVPALRKMQGILDPRPTIIKARLSCDVKLDPRPEYHRCILTWHHQEPLPWAQSTGNQMSSRLMSMRSANGLLMLPPKTEQYVELHKGEVVDVMVIGRL	lcl|GPHN_201:1065-1775_ORF2_GPHN_201:1064:1774	['GPHN_201_ORF2', 'GPHN_92_ORF2']
GPHN_202	ORF1	696	75.42	GPHN	E40	ATGGGAGCAAAGTTT	ATGGGAGCAAAGTTTGACTTGTGGTTGGGTGGGACTATATCGGCATACAAGATAGTACCAGATGAAATAGAAGAAATCAAGGAAACACTCATAGACTGGTGTGATGAAAAGGAACTTAATTTAATATTAACAACTGGAGGAACGGGGTTTGCACCACGAGATGTCACTCCAGAGGCCACAAAAGAAGTAATAGAGCGGGAAGCGCCAGGGATGGCCCTGGCAATGCTGATGGGATCGCTCAATGTCACACCTCTGGGCATGCTCTCTAGACCAGTGTGTGGAATAAGGGGGAAAACTCTGATAATTAACCTACCTGGTAGCAAGAAAGGATCTCAGGAATGCTTTCAGTTCATACTGCCAGCTCTACCTCATGCCATTGACCTTTTACGTGATGCCATT…	MGAKFDLWLGGTISAYKIVPDEIEEIKETLIDWCDEKELNLILTTGGTGFAPRDVTPEATKEVIEREAPGMALAMLMGSLNVTPLGMLSRPVCGIRGKTLIINLPGSKKGSQECFQFILPALPHAIDLLRDAIVKVKEVHDELEDLPSPPPPLSPPPTTSPHKQTEDKGVQCEEEEEEKKDSGVASTEDSSSSHITAAALAAKIPDSIISRGVQVLPRDTASLSTTPSESPRAQATSRLSTASCPTPKVQSRCSSKENILRASHSAVDITKVARRHRMSPFPLTSMDKAFITVLEMTPVLGTEIINYRDGMGRVLAQDVYAKDNLPPFPASVKDGYAVRAADGPGDRFIIGESQAGEQPTQTVMPGQVMRVTTGAPIPCGADAVVQVEDTELIRESDDG…	lcl|GPHN_202:275-2365_ORF1_GPHN_202:274:2364	['GPHN_202_ORF1']
GPHN_203	ORF1	238	26.33	GPHN	E40	ATGGCGACCGAGGGA	ATGGCGACCGAGGGAATGATCCTCACCAACCACGACCATCAAATCCGTGTCGGAGTCCTCACAGGAAAGATTCGGGACAGCAATCGATCAACACTTCTAGCAACAATTCAGGAACATGGTTACCCAACAATCAACCTGGGAATTGTAGGAGACAACCCAGATGACTTACTCAATGCCTTGAATGAGGGTATCAGCCGTGCTGATGTCATCATCACGTCAGGAGGTGTGTCCATGGGGGAAAAGGACTATCTCAAGCAGGTGCTGGACATTGATCTTCATGCTCAGATCCATTTTGGCAGAGTTTTTATGAAGCCAGGCTTGCCAACAACATTTGCAACTTTGGATATTGATGGTGTAAGAAAAATTATTTTTGCACTACCAGGGAATCCTGTATCAGCT…	MATEGMILTNHDHQIRVGVLTGKIRDSNRSTLLATIQEHGYPTINLGIVGDNPDDLLNALNEGISRADVIITSGGVSMGEKDYLKQVLDIDLHAQIHFGRVFMKPGLPTTFATLDIDGVRKIIFALPGNPVSAVVTCNLFVVPALRKMQGILDPRPTIIKARLSCDVKLDPRPEYHRCILTWHHQEPLPWAQSTGNQMSSRLMSMRSANGLLMLPPKTEQYVELHKGEVVDVMVIGRL	lcl|GPHN_203:8-724_ORF1_GPHN_203:7:723	['GPHN_203_ORF1']
GPHN_204	ORF1	351	37.79	GPHN	PTC	ATGGCGACCGAGGGA	ATGGCGACCGAGGGAATGATCCTCACCAACCACGACCATCAAATCCGTGTCGGAGTCCTCACAGTGAGTGATAGCTGCTTCAGGAATCTTGCAGAAGACCGCAGTGGGATAAATCTAAAAGATCTTGTCCAAGATCCTTCTTTGTTGGGTGGGACTATATCGGCATACAAGATAGTACCAGATGAAATAGAAGAAATCAAGGAAACACTCATAGACTGGTGTGATGAAAAGGAACTTAATTTAATATTAACAACTGGAGGAACGGGGTTTGCACCACGAGATGTCACTCCAGAGGCCACAAAAGAAGTAATAGAGCGGGAAGCGCCAGGGATGGCCCTGGCAATGCTGATGGGATCGCTCAATGTCACACCTCTGGGCATGCTCTCTAGACCAGTGTGT…	MATEGMILTNHDHQIRVGVLTVSDSCFRNLAEDRSGINLKDLVQDPSLLGGTISAYKIVPDEIEEIKETLIDWCDEKELNLILTTGGTGFAPRDVTPEATKEVIEREAPGMALAMLMGSLNVTPLGMLSRPVCGIRGKTLIINLPGSKKGSQIPDSIISRGVQVLPRDTASLSTTPSESPRAQATSRLSTASCPTPKVQSRCSSKENILRASHSAVDITKVARRHRMSPFPLTSMDKAFITVLEMTPVLGTEIINYRDGMGRVLAQDVYAKDNLPPFPASVKDGYAVRAADGPGDRFIIGESQAGEQPTQTVMPGQVMRVTTGAPIPCGADAVVQVEDTELIRESDDTHRP	lcl|GPHN_204:8-1063_ORF1_GPHN_204:7:1062	['GPHN_204_ORF1']
	ORF2	290	31.72	GPHN	E40	TTGAAGATACTGAAC	TTGAAGATACTGAACTCATCAGGGAATCAGATGATACCCATCGGCCATGACATTAAGAGAGGGGAGTGTGTTTTGGCCAAAGGAACCCATATGGGCCCTTCAGAGATTGGTCTCCTTGCAACTGTGGGTGTCACAGAAGTGGAAGTTAATAAGTTTCCAGTGGTTGCCGTTATGTCAACAGGGAATGAGCTGCTAAATCCTGAAGATGATCTCTTACCAGGAAAGATTCGGGACAGCAATCGATCAACACTTCTAGCAACAATTCAGGAACATGGTTACCCAACAATCAACCTGGGAATTGTAGGAGACAACCCAGATGACTTACTCAATGCCTTGAATGAGGGTATCAGCCGTGCTGATGTCATCATCACGTCAGGAGGTGTGTCCATGGGGGAAAAG…	MKILNSSGNQMIPIGHDIKRGECVLAKGTHMGPSEIGLLATVGVTEVEVNKFPVVAVMSTGNELLNPEDDLLPGKIRDSNRSTLLATIQEHGYPTINLGIVGDNPDDLLNALNEGISRADVIITSGGVSMGEKDYLKQVLDIDLHAQIHFGRVFMKPGLPTTFATLDIDGVRKIIFALPGNPVSAVVTCNLFVVPALRKMQGILDPRPTIIKARLSCDVKLDPRPEYHRCILTWHHQEPLPWAQSTGNQMSSRLMSMRSANGLLMLPPKTEQYVELHKGEVVDVMVIGRL	lcl|GPHN_204:1014-1886_ORF2_GPHN_204:1013:1885	['GPHN_204_ORF2', 'GPHN_223_ORF1', 'GPHN_224_ORF2']
GPHN_205	ORF1	636	69.53	GPHN	E40	CTGCTTCAGGAATCT	CTGCTTCAGGAATCTTGCAGAAGACCGCAGTGGGATAAATCTAAAAGATCTTGTCCAAGATCCTTCTTTGAAACACTCATAGACTGGTGTGATGAAAAGGAACTTAATTTAATATTAACAACTGGAGGAACGGGGTTTGCACCACGAGATGTCACTCCAGAGGCCACAAAAGAAGTAATAGAGCGGGAAGCGCCAGGGATGGCCCTGGCAATGCTGATGGGATCGCTCAATGTCACACCTCTGGGCATGCTCTCTAGACCAGTGTGTGGAATAAGGGGGAAAACTCTGATAATTAACCTACCTGGTAGCAAGAAAGGATCTCAGATTCCAGACTCCATCATTTCTCGTGGTGTTCAGGTGCTCCCACGAGACACAGCCTCCCTTAGCACTACTCCTTCA…	MLQESCRRPQWDKSKRSCPRSFFETLIDWCDEKELNLILTTGGTGFAPRDVTPEATKEVIEREAPGMALAMLMGSLNVTPLGMLSRPVCGIRGKTLIINLPGSKKGSQIPDSIISRGVQVLPRDTASLSTTPSESPRAQATSRLSTASCPTPKARLPSCSSTYSVSELHSRLEGLKDELWRNRGYDLRVQSRCSSKENILRASHSAVDITKVARRHRMSPFPLTSMDKAFITVLEMTPVLGTEIINYRDGMGRVLAQDVYAKDNLPPFPASVKDGYAVRAADGPGDRFIIGESQAGEQPTQTVMPGQVMRVTTGAPIPCGADAVVQVEDTELIRESDDGTEELEVRILVQARPGQDIRPIGHDIKRGECVLAKGTHMGPSEIGLLATVGVTEVEVNKFP…	lcl|GPHN_205:82-1992_ORF1_GPHN_205:81:1991	['GPHN_205_ORF1']
GPHN_206	ORF1	705	76.72	GPHN	E40	CTGCTTCAGGAATCT	CTGCTTCAGGAATCTTGCAGAAGACCGCAGTGGGATAAATCTAAAAGATCTTGTCCAAGATCCTTCTTTGAAACACTCATAGACTGGTGTGATGAAAAGGAACTTAATTTAATATTAACAACTGGAGGAACGGGGTTTGCACCACGAGATGTCACTCCAGAGAAATTCCCAACATTCCCATTTTGTGGGCTCCAGAAAGGGGCCACAAAAGAAGTAATAGAGCGGGAAGCGCCAGGGATGGCCCTGGCAATGCTGATGGGATCGCTCAATGTCACACCTCTGGGCATGCTCTCTAGACCAGTGTGTGGAATAAGGGGGAAAACTCTGATAATTAACCTACCTGGTAGCAAGAAAGGATCTCAGGAATGCTTTCAGTTCATACTGCCAGCTCTACCTCAT…	MLQESCRRPQWDKSKRSCPRSFFETLIDWCDEKELNLILTTGGTGFAPRDVTPEKFPTFPFCGLQKGATKEVIEREAPGMALAMLMGSLNVTPLGMLSRPVCGIRGKTLIINLPGSKKGSQECFQFILPALPHAIDLLRDAIVKVKEVHDELEDLPSPPPPLSPPPTTSPHKQTEDKGVQCEEEEEEKKDSGVASTEDSSSSHITAAALAAKIPDSIISRGVQVLPRDTASLSTTPSESPRAQATSRLSTASCPTPKVQSRCSSKENILRASHSAVDITKVARRHRMSPFPLTSMDKAFITVLEMTPVLGTEIINYRDGMGRVLAQDVYAKDNLPPFPASVKDGYAVRAADGPGDRFIIGESQAGEQPTQTVMPGQVMRVTTGAPIPCGADAVVQVEDT…	lcl|GPHN_206:82-2199_ORF1_GPHN_206:81:2198	['GPHN_206_ORF1']
GPHN_207	ORF1	619	67.45	GPHN	E40	ATGGCGACCGAGGGA	ATGGCGACCGAGGGAATGATCCTCACCAACCACGACCATCAAATCCGTGTCGGAGTCCTCACAGTGAGTGATAGCTGCTTCAGGAATCTTGCAGAAGACCGCAGTGGGATAAATCTAAAAGATCTTGTCCAAGATCCTTCTTTGTTGGGTGGGACTATATCGGCATACAAGATAGTACCAGATGAAATAGAAGAAATCAAGGAAACACTCATAGACTGGTGTGATGAAAAGGAACTTAATTTAATATTAACAACTGGAGGAACGGGGTTTGCACCACGAGATGTCACTCCAGAGATTCCAGACTCCATCATTTCTCGTGGTGTTCAGGTGCTCCCACGAGACACAGCCTCCCTTAGCACTACTCCTTCAGAATCGCCCCGTGCTCAGGCTACATCTCGC…	MATEGMILTNHDHQIRVGVLTVSDSCFRNLAEDRSGINLKDLVQDPSLLGGTISAYKIVPDEIEEIKETLIDWCDEKELNLILTTGGTGFAPRDVTPEIPDSIISRGVQVLPRDTASLSTTPSESPRAQATSRLSTASCPTPKYLLSLGDFVHKTFKARLPSCSSTYSVSEVQSRCSSKENILRASHSAVDITKVARRHRMSPFPLTSMDKAFITVLEMTPVLGTEIINYRDGMGRVLAQDVYAKDNLPPFPASVKDGYAVRAADGPGDRFIIGESQAGEQPTQTVMPGQVMRVTTGAPIPCGADAVVQVEDTELIRESDDGTEELEVRILVQARPGQDIRPIGHDIKRGECVLAKGTHMGPSEIGLLATVGVTEVEVNKFPVVAVMSTGNELLNPEDD…	lcl|GPHN_207:8-1867_ORF1_GPHN_207:7:1866	['GPHN_207_ORF1']
GPHN_208	ORF1	308	33.02	GPHN	PTC	ATGGCGACCGAGGGA	ATGGCGACCGAGGGAATGATCCTCACCAACCACGACCATCAAATCCGTGTCGGAGTCCTCACAGTGAGTGATAGCTGCTTCAGGAATCTTGCAGAAGACCGCAGTGGGATAAATCTAAAAGATCTTGTCCAAGATCCTTCTTTGTTGGGTGGGACTATATCGGCATACAAGATAGTACCAGATGAAATAGAAGAAATCAAGGAAACACTCATAGACTGGTGTGATGAAAAGGAACTTAATTTAATATTAACAACTGGAGGAACGGGGTTTGCACCACGAGATGTCACTCCAGAGGCCACAAAAGAAGTAATAGAGCGGGAAGCGCCAGGGATGGCCCTGGCAATGCTGATGGGATCGCTCAATGTCACACCTCTGGGCATGCTCTCTAGACCAGTGTGT…	MATEGMILTNHDHQIRVGVLTVSDSCFRNLAEDRSGINLKDLVQDPSLLGGTISAYKIVPDEIEEIKETLIDWCDEKELNLILTTGGTGFAPRDVTPEATKEVIEREAPGMALAMLMGSLNVTPLGMLSRPVCGIRGKTLIINLPGSKKGSQECFQFILPALPHAIDLLRDAIVKVKEVHDELEDLPSPPPPLSPPPTTSPHKQTEDKGVQCEEEEEEKKDSGVASTEDSSSSHITAAALAAKIPDSIISRGVQVLPRDTASLSTTPSESPRAQATSRLSTASCPTPKARLPSCSSTYSVSEAILHFS	lcl|GPHN_208:8-934_ORF1_GPHN_208:7:933	['GPHN_208_ORF1']
	ORF2	462	50.54	GPHN	E40	TTGCTCCATGACATT	TTGCTCCATGACATTCAGCTCTTGCAGGAACTTGGGCTCCATGTCCAGTCCAGGTGCAGCAGCAAGGAGAACATTCTAAGAGCCAGTCACAGTGCTGTAGATATCACCAAGGTGGCTAGAAGACATCGCATGTCTCCTTTTCCCCTGACGTCTATGGACAAAGCCTTCATTACAGTCCTGGAGATGACTCCGGTGCTTGGTACAGAAATCATCAATTACCGAGATGGAATGGGGCGAGTCCTTGCTCAAGATGTATATGCAAAAGACAACCTACCCCCATTCCCTGCATCAGTAAAAGATGGCTATGCTGTTCGAGCTGCTGATGGTCCAGGGGATCGTTTCATCATTGGGGAATCCCAAGCTGGTGAGCAGCCAACTCAGACAGTAATGCCAGGACAA…	MLHDIQLLQELGLHVQSRCSSKENILRASHSAVDITKVARRHRMSPFPLTSMDKAFITVLEMTPVLGTEIINYRDGMGRVLAQDVYAKDNLPPFPASVKDGYAVRAADGPGDRFIIGESQAGEQPTQTVMPGQVMRVTTGAPIPCGADAVVQVEDTELIRESDDGTEELEVRILVQARPGQDIRPIGHDIKRGECVLAKGTHMGPSEIGLLATVGVTEVEVNKFPVVAVMSTGNELLNPEDDLLPGKIRDSNRSTLLATIQEHGYPTINLGIVGDNPDDLLNALNEGISRADVIITSGGVSMGEKDYLKQVLDIDLHAQIHFGRVFMKPGLPTTFATLDIDGVRKIIFALPGNPVSAVVTCNLFVVPALRKMQGILDPRPTIIKARLSCDVKLDPRPEY…	lcl|GPHN_208:1079-2467_ORF2_GPHN_208:1078:2466	['GPHN_208_ORF2']
GPHN_209	ORF1	154	16.6	GPHN	PTC	ATGGCGACCGAGGGA	ATGGCGACCGAGGGAATGATCCTCACCAACCACGACCATCAAATCCGTGTCGGAGTCCTCACAGTGAGTGATAGCTGCTTCAGGAATCTTGCAGAAGACCGCAGTGGGATAAATCTAAAAGATCTTGTCCAAGATCCTTCTTTGTTGGGTGGGACTATATCGGCATACAAGATAGTACCAGATGAAATAGAAGAAATCAAGGAAACACTCATAGACTGGTGTGATGAAAAGGAACTTAATTTAATATTAACAACTGGAGGAACGGGGTTTGCACCACGAGATGTCACTCCAGAGGCCACAAAAGAAGTAATAGAGCGGGAAGCGCCAGGGATGGCCCTGGCAATGCTGATGGGATCGCTCAATGTCACACCTCTGGGCATGCTCTCTAGACCAGTGTGT…	MATEGMILTNHDHQIRVGVLTVSDSCFRNLAEDRSGINLKDLVQDPSLLGGTISAYKIVPDEIEEIKETLIDWCDEKELNLILTTGGTGFAPRDVTPEATKEVIEREAPGMALAMLMGSLNVTPLGMLSRPVCGIRGKTLIINLPGSKKGSQPT	lcl|GPHN_209:8-472_ORF1_GPHN_209:7:471	['GPHN_104_ORF1', 'GPHN_119_ORF2', 'GPHN_169_ORF2', 'GPHN_209_ORF1', 'GPHN_55_ORF1', 'GPHN_80_ORF1']
	ORF2	114	12.17	GPHN	PTC	CTGGTAGCAAGAAAG	CTGGTAGCAAGAAAGGATCTCAGCCCACATAAACAGACAGAAGACAAAGGAGTTCAGTGTGAAGAAGAGGAAGAAGAAAAGAAAGACAGTGGTGTAGCTTCAACAGAAGATAGTTCCTCATCACATATAACTGCAGCAGCTCTTGCTGCAAAGATTCCAGACTCCATCATTTCTCGTGGTGTTCAGGTGCTCCCACGAGACACAGCCTCCCTTAGCACTACTCCTTCAGAATCGCCCCGTGCTCAGGCTACATCTCGCCTCTCTACAGCTTCTTGTCCAACACCAAAACTAAATGCAAATGTAACACTACTCCAGATACTGCTTCATCAGAAGTCCCCAAGATAA	MVARKDLSPHKQTEDKGVQCEEEEEEKKDSGVASTEDSSSSHITAAALAAKIPDSIISRGVQVLPRDTASLSTTPSESPRAQATSRLSTASCPTPKLNANVTLLQILLHQKSPR	lcl|GPHN_209:441-785_ORF2_GPHN_209:440:784	['GPHN_209_ORF2']
	ORF3	419	45.61	GPHN	E40	ATGTCTCCTTTTCCC	ATGTCTCCTTTTCCCCTGACGTCTATGGACAAAGCCTTCATTACAGTCCTGGAGATGACTCCGGTGCTTGGTACAGAAATCATCAATTACCGAGATGGAATGGGGCGAGTCCTTGCTCAAGATGTATATGCAAAAGACAACCTACCCCCATTCCCTGCATCAGTAAAAGATGGCTATGCTGTTCGAGCTGCTGATGGTCCAGGGGATCGTTTCATCATTGGGGAATCCCAAGCTGGTGAGCAGCCAACTCAGACAGTAATGCCAGGACAAGTGATGCGGGTTACAACAGGTGCTCCAATCCCCTGCGGTGCTGATGCAGTAGTGCAAGTTGAAGATACTGAACTCATCAGGGAATCAGATGATGGTACTGAAGAACTTGAAGTACGAATTCTGGTGCAA…	MSPFPLTSMDKAFITVLEMTPVLGTEIINYRDGMGRVLAQDVYAKDNLPPFPASVKDGYAVRAADGPGDRFIIGESQAGEQPTQTVMPGQVMRVTTGAPIPCGADAVVQVEDTELIRESDDGTEELEVRILVQARPGQDIRPIGHDIKRGECVLAKGTHMGPSEIGLLATVGVTEVEVNKFPVVAVMSTGNELLNPEDDLLPGKIRDSNRSTLLATIQEHGYPTINLGIVGDNPDDLLNALNEGISRADVIITSGGVSMGEKDYLKQVLDIDLHAQIHFGRVFMKPGLPTTFATLDIDGVRKIIFALPGNPVSAVVTCNLFVVPALRKMQGILDPRPTIIKARLSCDVKLDPRPEYHRCILTWHHQEPLPWAQSTGNQMSSRLMSMRSANGLLMLPPKT…	lcl|GPHN_209:921-2180_ORF3_GPHN_209:920:2179	['GPHN_110_ORF1', 'GPHN_15_ORF1', 'GPHN_173_ORF1', 'GPHN_192_ORF2', 'GPHN_209_ORF3', 'GPHN_227_ORF2', 'GPHN_228_ORF2', 'GPHN_257_ORF1', 'GPHN_264_ORF2', 'GPHN_265_ORF2', 'GPHN_268_ORF2', 'GPHN_30_ORF1', 'GPHN_36_ORF1', 'GPHN_52_ORF1', 'GPHN_80_ORF2']
GPHN_210	ORF1	481	52.5	GPHN	E40	ATGGCGACCGAGGGA	ATGGCGACCGAGGGAATGATCCTCACCAACCACGACCATCAAATCCGTGTCGGAGTCCTCACAGTGAGTGATAGCTGCTTCAGGAATCTTGCAGAAGACCGCAGTGGGATAAATCTAAAAGATCTTGTCCAAGATCCTTCTTTGTTGGGTGGGACTATATCGGCATACAAGATAGTACCAGATGAAATAGAAGAAATCAAGGAAACACTCATAGACTGGTGTGATGAAAAGGAACTTAATTTAATATTAACAACTGGAGGAACGGGGTTTGCACCACGAGATGTCACTCCAGAGGCCACAAAAGAAGTAATAGAGCGGGAAGCGCCAGGGATGGCCCTGGCAATGCTGATGGGATCGCTCAATGTCACACCTCTGGGCATGCTCTCTAGACCAGTGTGT…	MATEGMILTNHDHQIRVGVLTVSDSCFRNLAEDRSGINLKDLVQDPSLLGGTISAYKIVPDEIEEIKETLIDWCDEKELNLILTTGGTGFAPRDVTPEATKEVIEREAPGMALAMLMGSLNVTPLGMLSRPVCGIRGKTLIINLPGSKKGSQECFQFILPALPHAIDLLRDAIVKVKEVHDELEDLPSPPPPLSPPPTTSPHKQTEDKGVQCEEEEEEKKDSGVASTEDSSSSHITAAALAAKKHPFYTSPALFMANHGQPIPGLISYSHHATGSADKRIPDSIISRGVQVLPRDTASLSTTPSESPRAQATSRLSTASCPTPKDYLKQVLDIDLHAQIHFGRVFMKPGLPTTFATLDIDGVRKIIFALPGNPVSAVVTCNLFVVPALRKMQGILDPRP…	lcl|GPHN_210:8-1453_ORF1_GPHN_210:7:1452	['GPHN_210_ORF1']
	ORF2	110	12.57	unknown	PTC	CTGCAGCAGCTCTTG	CTGCAGCAGCTCTTGCTGCAAAGAAGCATCCATTCTACACCAGTCCTGCTCTTTTCATGGCAAATCATGGGCAGCCCATCCCTGGTCTCATCAGTTATTCCCATCATGCAACAGGCAGTGCAGATAAACGGATTCCAGACTCCATCATTTCTCGTGGTGTTCAGGTGCTCCCACGAGACACAGCCTCCCTTAGCACTACTCCTTCAGAATCGCCCCGTGCTCAGGCTACATCTCGCCTCTCTACAGCTTCTTGTCCAACACCAAAAGACTATCTCAAGCAGGTGCTGGACATTGATCTTCATGCTCAGATCCATTTTGGCAGAGTTTTTATGA	MQQLLLQRSIHSTPVLLFSWQIMGSPSLVSSVIPIMQQAVQINGFQTPSFLVVFRCSHETQPPLALLLQNRPVLRLHLASLQLLVQHQKTISSRCWTLIFMLRSILAEFL	lcl|GPHN_210:714-1046_ORF2_GPHN_210:713:1045	['GPHN_210_ORF2']
GPHN_211	ORF1	478	51.54	GPHN	E40	ATGGCGACCGAGGGA	ATGGCGACCGAGGGAATGATCCTCACCAACCACGACCATCAAATCCGTGTCGGAGTCCTCACAGTGAGTGATAGCTGCTTCAGGAATCTTGCAGAAGACCGCAGTGGGATAAATCTAAAAGATCTTGTCCAAGATCCTTCTTTGTTGGGTGGGACTATATCGGCATACAAGATAGTACCAGATGAAATAGAAGAAATCAAGGAAACACTCATAGACTGGTGTGATGAAAAGGAACTTAATTTAATATTAACAACTGGAGGAACGGGGTTTGCACCACGAGATGTCACTCCAGAGGCCACAAAAGAAGTAATAGAGCGGGAAGCGCCAGGGATGGCCCTGGCAATGCTGATGGGATCGCTCAATGTCACACCTCTGGGCATGCTCTCTAGACCAGTGTGT…	MATEGMILTNHDHQIRVGVLTVSDSCFRNLAEDRSGINLKDLVQDPSLLGGTISAYKIVPDEIEEIKETLIDWCDEKELNLILTTGGTGFAPRDVTPEATKEVIEREAPGMALAMLMGSLNVTPLGMLSRPVCGIRGKTLIINLPGSKKGSQECFQFILPALPHAIDLLRDAIVKVKEVHDELEDLPSPPPPLSPPPTTSPHKQTEDKGVQCEEEEEEKKDSGVASTEDSSSSHITAAALAAKKHPFYTSPALFMANHGQPIPGLISYSHHATGSADKRIPDSIISRGVQVLPRDTASLSTTPSESPRAQATSRLSTASCPTPKLLNPEDDLLPGKIRDSNRSTLLATIQEHGYPTINLGIVGDNPDDLLNALNEGISRADVIITSGGVSMGEKDYLKQ…	lcl|GPHN_211:8-1444_ORF1_GPHN_211:7:1443	['GPHN_211_ORF1']
GPHN_212	ORF1	759	82.18	GPHN	E40	ATGGCGACCGAGGGA	ATGGCGACCGAGGGAATGATCCTCACCAACCACGACCATCAAATCCGTGTCGGAGTCCTCACAGTGAGTGATAGCTGCTTCAGGAATCTTGCAGAAGACCGCAGTGGGATAAATCTAAAAGATCTTGTCCAAGATCCTTCTTTGTTGGGTGGGACTATATCGGCATACAAGATAGTACCAGATGAAATAGAAGAAATCAAGGAAACACTCATAGACTGGTGTGATGAAAAGGAACTTAATTTAATATTAACAACTGGAGGAACGGGGTTTGCACCACGAGATGTCACTCCAGAGGCCACAAAAGAAGTAATAGAGCGGGAAGCGCCAGGGATGGCCCTGGCAATGCTGATGGGATCGCTCAATGTCACACCTCTGGGCATGCTCTCTAGACCAGTGTGT…	MATEGMILTNHDHQIRVGVLTVSDSCFRNLAEDRSGINLKDLVQDPSLLGGTISAYKIVPDEIEEIKETLIDWCDEKELNLILTTGGTGFAPRDVTPEATKEVIEREAPGMALAMLMGSLNVTPLGMLSRPVCGIRGKTLIINLPGSKKGSQECFQFILPALPHAIDLLRDAIVKVKEVHDELEDLPSPPPPLSPPPTTSPHKQTEDKGVQCEEEEEEKKDSGVASTEDSSSSHITAAALAAKKHPFYTSPALFMANHGQPIPGLISYSHHATGSADKRIPDSIISRGVQVLPRDTASLSTTPSESPRAQATSRLSTASCPTPKQIRRPDESKGVASRVGSLKYLLSLGDFVHKTFKVQSRCSSKENILRANGMGRVLAQDVYAKDNLPPFPASVKDGY…	lcl|GPHN_212:8-2287_ORF1_GPHN_212:7:2286	['GPHN_212_ORF1']
	ORF2	133	15.24	unknown	PTC	CTGCAGCAGCTCTTG	CTGCAGCAGCTCTTGCTGCAAAGAAGCATCCATTCTACACCAGTCCTGCTCTTTTCATGGCAAATCATGGGCAGCCCATCCCTGGTCTCATCAGTTATTCCCATCATGCAACAGGCAGTGCAGATAAACGGATTCCAGACTCCATCATTTCTCGTGGTGTTCAGGTGCTCCCACGAGACACAGCCTCCCTTAGCACTACTCCTTCAGAATCGCCCCGTGCTCAGGCTACATCTCGCCTCTCTACAGCTTCTTGTCCAACACCAAAACAAATTAGACGGCCGGATGAAAGCAAAGGAGTTGCTAGTAGAGTTGGATCCCTCAAATATCTATTATCACTGGGAGATTTTGTACATAAAACATTTAAGGTCCAGTCCAGGTGCAGCAGCAAGGAGAACATTC…	MQQLLLQRSIHSTPVLLFSWQIMGSPSLVSSVIPIMQQAVQINGFQTPSFLVVFRCSHETQPPLALLLQNRPVLRLHLASLQLLVQHQNKLDGRMKAKELLVELDPSNIYYHWEILYIKHLRSSPGAAARRTF	lcl|GPHN_212:714-1115_ORF2_GPHN_212:713:1114	['GPHN_142_ORF2', 'GPHN_212_ORF2']
GPHN_213	ORF1	651	70.97	GPHN	E40	ATGGCGACCGAGGGA	ATGGCGACCGAGGGAATGATCCTCACCAACCACGACCATCAAATCCGTGTCGGAGTCCTCACAGTGAGTGATAGCTGCTTCAGGAATCTTGCAGAAGACCGCAGTGGGATAAATCTAAAAGATCTTGTCCAAGATCCTTCTTTGTTGGGTGGGACTATATCGGCATACAAGATAGTACCAGATGAAATAGAAGAAATCAAGGAAACACTCATAGACTGGTGTGATGAAAAGGAACTTAATTTAATATTAACAACTGGAGGAACGGGGTTTGCACCACGAGATGTCACTCCAGAGAAATTCCCAACATTCCCATTTTGTGGGCTCCAGAAAGGGATTCCAGACTCCATCATTTCTCGTGGTGTTCAGGTGCTCCCACGAGACACAGCCTCCCTTAGCACT…	MATEGMILTNHDHQIRVGVLTVSDSCFRNLAEDRSGINLKDLVQDPSLLGGTISAYKIVPDEIEEIKETLIDWCDEKELNLILTTGGTGFAPRDVTPEKFPTFPFCGLQKGIPDSIISRGVQVLPRDTASLSTTPSESPRAQATSRLSTASCPTPKQIRRPDESKGVASRVGSLKYLLSLGDFVHKTFKARLPSCSSTYSVSEVQSRCSSKENILRASHSAVDITKVARRHRMSPFPLTSMDKAFITVLEMTPVLGTEIINYRDGMGRVLAQDVYAKDNLPPFPASVKDGYAVRAADGPGDRFIIGESQAGEQPTQTVMPGQVMRVTTGAPIPCGADAVVQVEDTELIRESDDGTEELEVRILVQARPGQDIRPIGHDIKRGECVLAKGTHMGPSEIGL…	lcl|GPHN_213:8-1963_ORF1_GPHN_213:7:1962	['GPHN_213_ORF1']
	ORF2	130	15.23	unknown	PTC	CTGGAGGAACGGGGT	CTGGAGGAACGGGGTTTGCACCACGAGATGTCACTCCAGAGAAATTCCCAACATTCCCATTTTGTGGGCTCCAGAAAGGGATTCCAGACTCCATCATTTCTCGTGGTGTTCAGGTGCTCCCACGAGACACAGCCTCCCTTAGCACTACTCCTTCAGAATCGCCCCGTGCTCAGGCTACATCTCGCCTCTCTACAGCTTCTTGTCCAACACCAAAACAAATTAGACGGCCGGATGAAAGCAAAGGAGTTGCTAGTAGAGTTGGATCCCTCAAATATCTATTATCACTGGGAGATTTTGTACATAAAACATTTAAGGCTCGGCTTCCGTCGTGCTCATCTACCTATAGTGTATCTGAGGTCCAGTCCAGGTGCAGCAGCAAGGAGAACATTCTAA	MEERGLHHEMSLQRNSQHSHFVGSRKGFQTPSFLVVFRCSHETQPPLALLLQNRPVLRLHLASLQLLVQHQNKLDGRMKAKELLVELDPSNIYYHWEILYIKHLRLGFRRAHLPIVYLRSSPGAAARRTF	lcl|GPHN_213:261-653_ORF2_GPHN_213:260:652	['GPHN_213_ORF2']
GPHN_214	ORF1	123	13.57	GPHN	PTC	ATGGCGACCGAGGGA	ATGGCGACCGAGGGAATGATCCTCACCAACCACGACCATCAAATCCGTGTCGGAGTCCTCACAGTGAGTGATAGCTGCTTCAGGAATCTTGCAGAAGACCGCAGTGGGATAAATCTAAAAGATCTTGTCCAAGATCCTTCTTTGTTGGGTGGGACTATATCGGCATACAAGATAGTACCAGATGAAATAGAAGAAATCAAGGAAACACTCATAGACTGGTGTGATGAAAAGGAACTTAATTTAATATTAACAACTGGAGGAACGGGGTTTGCACCACGAGATGTCACTCCAGAGAAATTCCCAACATTCCCATTTTGTGGGCTCCAGAAAGGGACCAGTGTGTGGAATAAGGGGGAAAACTCTGATAATTAA	MATEGMILTNHDHQIRVGVLTVSDSCFRNLAEDRSGINLKDLVQDPSLLGGTISAYKIVPDEIEEIKETLIDWCDEKELNLILTTGGTGFAPRDVTPEKFPTFPFCGLQKGTSVWNKGENSDN	lcl|GPHN_214:8-379_ORF1_GPHN_214:7:378	['GPHN_214_ORF1', 'GPHN_275_ORF1', 'GPHN_85_ORF1', 'GPHN_90_ORF1']
	ORF2	588	64.12	GPHN	E40	CTGGAGGAACGGGGT	CTGGAGGAACGGGGTTTGCACCACGAGATGTCACTCCAGAGAAATTCCCAACATTCCCATTTTGTGGGCTCCAGAAAGGGACCAGTGTGTGGAATAAGGGGGAAAACTCTGATAATTAACCTACCTGGTAGCAAGAAAGGATCTCAGGAATGCTTTCAGTTCATACTGCCAGCTCTACCTCATGCCATTGACCTTTTACGTGATGCCATTGTAAAAGTAAAGGAGGTGCATGATGAACTTGAAGATTTACCTTCCCCACCACCTCCTCTCTCTCCACCTCCTACAACTAGCCCACATAAACAGACAGAAGACAAAGGAGTTCAGTGTGAAGAAGAGGAAGAAGAAAAGAAAGACAGTGGTGTAGCTTCAACAGAAGATAGTTCCTCATCACATATAACT…	MEERGLHHEMSLQRNSQHSHFVGSRKGPVCGIRGKTLIINLPGSKKGSQECFQFILPALPHAIDLLRDAIVKVKEVHDELEDLPSPPPPLSPPPTTSPHKQTEDKGVQCEEEEEEKKDSGVASTEDSSSSHITAAALAAKVQSRCSSKENILRASHSAVDITKVARRHRMSPFPLTSMDKAFITVLEMTPVLGTEIINYRDGMGRVLAQDVYAKDNLPPFPASVKDGYAVRAADGPGDRFIIGESQAGEQPTQTVMPGQVMRVTTGAPIPCGADAVVQVEDTELIRESDDGTEELEVRILVQARPGQDIRPIGHDIKRGECVLAKGTHMGPSEIGLLATVGVTEVEVNKFPVVAVMSTGNELLNPEDDLLPGKIRDSNRSTLLATIQEHGYPTINLGIV…	lcl|GPHN_214:261-2027_ORF2_GPHN_214:260:2026	['GPHN_214_ORF2']
GPHN_215	ORF1	455	49.08	GPHN	E40	ATGGCGACCGAGGGA	ATGGCGACCGAGGGAATGATCCTCACCAACCACGACCATCAAATCCGTGTCGGAGTCCTCACAGTGAGTGATAGCTGCTTCAGGAATCTTGCAGAAGACCGCAGTGGGATAAATCTAAAAGATCTTGTCCAAGATCCTTCTTTGTTGGGTGGGACTATATCGGCATACAAGATAGTACCAGATGAAATAGAAGAAATCAAGGAAACACTCATAGACTGGTGTGATGAAAAGGAACTTAATTTAATATTAACAACTGGAGGAACGGGGTTTGCACCACGAGATGTCACTCCAGAGAAATTCCCAACATTCCCATTTTGTGGGCTCCAGAAAGGGGCCACAAAAGAAGTAATAGAGCGGGAAGCGCCAGGGATGGCCCTGGCAATGCTGATGGGATCGCTC…	MATEGMILTNHDHQIRVGVLTVSDSCFRNLAEDRSGINLKDLVQDPSLLGGTISAYKIVPDEIEEIKETLIDWCDEKELNLILTTGGTGFAPRDVTPEKFPTFPFCGLQKGATKEVIEREAPGMALAMLMGSLNVTPLGMLSRPVCGIRGKTLIINLPGSKKGSQECFQFILPALPHAIDLLRDAIVKVKEVHDELEDLPSPPPPLSPPPTTSPHKQTEDKGVQCEEEEEEKKDSGVASTEDSSSSHITAAALAAKIPDSIISRGVQVLPRDTASLSTTPSESPRAQATSRLSTASCPTPKLLNPEDDLLPGKIRDSNRSTLLATIQEHGYPTINLGIVGDNPDDLLNALNEGISRADVIITSGGVSMGEKDYLKQVLDIDLHAQIHFGRVFMKPGLPT…	lcl|GPHN_215:8-1375_ORF1_GPHN_215:7:1374	['GPHN_215_ORF1']
GPHN_216	ORF1	682	73.61	GPHN	E40	ATGGCGACCGAGGGA	ATGGCGACCGAGGGAATGATCCTCACCAACCACGACCATCAAATCCGTGTCGGAGTCCTCACAGTGAGTGATAGCTGCTTCAGGAATCTTGCAGAAGACCGCAGTGGGATAAATCTAAAAGATCTTGTCCAAGATCCTTCTTTGTTGGGTGGGACTATATCGGCATACAAGATAGTACCAGATGAAATAGAAGAAATCAAGGAAACACTCATAGACTGGTGTGATGAAAAGGAACTTAATTTAATATTAACAACTGGAGGAACGGGGTTTGCACCACGAGATGTCACTCCAGAGAAATTCCCAACATTCCCATTTTGTGGGCTCCAGAAAGGGGCCACAAAAGAAGTAATAGAGCGGGAAGCGCCAGGGATGGCCCTGGCAATGCTGATGGGATCGCTC…	MATEGMILTNHDHQIRVGVLTVSDSCFRNLAEDRSGINLKDLVQDPSLLGGTISAYKIVPDEIEEIKETLIDWCDEKELNLILTTGGTGFAPRDVTPEKFPTFPFCGLQKGATKEVIEREAPGMALAMLMGSLNVTPLGMLSRPVCGIRGKTLIINLPGSKKGSQECFQFILPALPHAIDLLRDAIVKVKEVHDELEDLPSPPPPLSPPPTTSPHKQTEDKGVQCEEEEEEKKDSGVASTEDSSSSHITAAALAAKIPDSIISRGVQVLPRDTASLSTTPSESPRAQATSRLSTASCPTPKVQSRCSSKENILRASHSAVDITKVARRHRMSPFPLTSMDKAFITVLEMTPVLGTEIINYRDGMGRVLAQDVYAKDNLPPFPASVKDGYAVRAADGPGD…	lcl|GPHN_216:8-2056_ORF1_GPHN_216:7:2055	['GPHN_216_ORF1']
GPHN_217	ORF1	795	86.34	GPHN	E40	ATGGCGACCGAGGGA	ATGGCGACCGAGGGAATGATCCTCACCAACCACGACCATCAAATCCGTGTCGGAGTCCTCACAGTGAGTGATAGCTGCTTCAGGAATCTTGCAGAAGACCGCAGTGGGATAAATCTAAAAGATCTTGTCCAAGATCCTTCTTTGTTGGGTGGGACTATATCGGCATACAAGATAGTACCAGATGAAATAGAAGAAATCAAGGAAACACTCATAGACTGGTGTGATGAAAAGGAACTTAATTTAATATTAACAACTGGAGGAACGGGGTTTGCACCACGAGATGTCACTCCAGAGAAATTCCCAACATTCCCATTTTGTGGGCTCCAGAAAGGGGCCACAAAAGAAGTAATAGAGCGGGAAGCGCCAGGGATGGCCCTGGCAATGCTGATGGGATCGCTC…	MATEGMILTNHDHQIRVGVLTVSDSCFRNLAEDRSGINLKDLVQDPSLLGGTISAYKIVPDEIEEIKETLIDWCDEKELNLILTTGGTGFAPRDVTPEKFPTFPFCGLQKGATKEVIEREAPGMALAMLMGSLNVTPLGMLSRPVCGIRGKTLIINLPGSKKGSQECFQFILPALPHAIDLLRDAIVKVKEVHDELEDLPSPPPPLSPPPTTSPHKQTEDKGVQCEEEEEEKKDSGVASTEDSSSSHITAAALAAKIPDSIISRGVQVLPRDTASLSTTPSESPRAQATSRLSTASCPTPKQIRRPDESKGVASRVGSLKYLLSLGDFVHKTFKVQSRCSSKENILRASLNLKDLAFSRISGHSAVDITKVARRHRMSPFPLTSMDKAFITVLEMTPVL…	lcl|GPHN_217:8-2395_ORF1_GPHN_217:7:2394	['GPHN_217_ORF1']
GPHN_218	ORF1	639	69.27	GPHN	E40	ATGCTGGCTCGTGCC	ATGCTGGCTCGTGCCTATAATCCCAGCACTGGGGAGGAAGACACAGTGAGTGATAGCTGCTTCAGGAATCTTGCAGAAGACCGCAGTGGGATAAATCTAAAAGATCTTGTCCAAGATCCTTCTTTGTTGGGTGGGACTATATCGGCATACAAGATAGTACCAGATGAAATAGAAGAAATCAAGGAAACACTCATAGACTGGTGTGATGAAAAGGAACTTAATTTAATATTAACAACTGGAGGAACGGGGTTTGCACCACGAGATGTCACTCCAGAGGCCACAAAAGAAGTAATAGAGCGGGAAGCGCCAGGGATGGCCCTGGCAATGCTGATGGGATCGCTCAATGTCACACCTCTGGGCATGCTCTCTAGACCAGTGTGTGGAATAAGGGGGAAAACT…	MLARAYNPSTGEEDTVSDSCFRNLAEDRSGINLKDLVQDPSLLGGTISAYKIVPDEIEEIKETLIDWCDEKELNLILTTGGTGFAPRDVTPEATKEVIEREAPGMALAMLMGSLNVTPLGMLSRPVCGIRGKTLIINLPGSKKGSQIPDSIISRGVQVLPRDTASLSTTPSESPRAQATSRLSTASCPTPKVQSRCSSKENILRASHSAVDITKVARRHRMSPFPLTSMDKAFITVLEMTPVLGTEIINYRDGMGRVLAQDVYAKDNLPPFPASVKDGYAVRAADGPGDRFIIGESQAGEQPTQTVMPGQVMRVTTGAPIPCGADAVVQVEDTELIRESDDGTEELEVRILVQARPGQDIRPIGHDIKRGECVLAKGTHMGPSEIGLLATVGVTEVEVN…	lcl|GPHN_218:75-1994_ORF1_GPHN_218:74:1993	['GPHN_218_ORF1']
GPHN_219	ORF1	730	79.08	GPHN	E40	ATGCTGGCTCGTGCC	ATGCTGGCTCGTGCCTATAATCCCAGCACTGGGGAGGAAGACACAGTGAGTGATAGCTGCTTCAGGAATCTTGCAGAAGACCGCAGTGGGATAAATCTAAAAGATCTTGTCCAAGATCCTTCTTTGTTGGGTGGGACTATATCGGCATACAAGATAGTACCAGATGAAATAGAAGAAATCAAGGAAACACTCATAGACTGGTGTGATGAAAAGGAACTTAATTTAATATTAACAACTGGAGGAACGGGGTTTGCACCACGAGATGTCACTCCAGAGGCCACAAAAGAAGTAATAGAGCGGGAAGCGCCAGGGATGGCCCTGGCAATGCTGATGGGATCGCTCAATGTCACACCTCTGGGCATGCTCTCTAGACCAGTGTGTGGAATAAGGGGGAAAACT…	MLARAYNPSTGEEDTVSDSCFRNLAEDRSGINLKDLVQDPSLLGGTISAYKIVPDEIEEIKETLIDWCDEKELNLILTTGGTGFAPRDVTPEATKEVIEREAPGMALAMLMGSLNVTPLGMLSRPVCGIRGKTLIINLPGSKKGSQECFQFILPALPHAIDLLRDAIVKVKEVHDELEDLPSPPPPLSPPPTTSPHKQTEDKGVQCEEEEEEKKDSGVASTEDSSSSHITAAALAAKIPDSIISRGVQVLPRDTASLSTTPSESPRAQATSRLSTASCPTPKVQSRCSSKENILRASHSAVDITKVARRHRMSPFPLTSMDKAFITVLEMTPVLGTEIINYRDGMGRVLAQDVYAKDNLPPFPASVKDGYAVRAADGPGDRFIIGESQAGEQPTQTVMP…	lcl|GPHN_219:75-2267_ORF1_GPHN_219:74:2266	['GPHN_219_ORF1']
GPHN_220	ORF1	366	39.52	GPHN	E40	TTGTCCAACACCAAA	TTGTCCAACACCAAAAGTCACAGTGCTGTAGATATCACCAAGGTGGCTAGAAGACATCGCATGTCTCCTTTTCCCCTGACGTCTATGGACAAAGCCTTCATTACAGTCCTGGAGATGACTCCGGTGCTTGGTACAGAAATCATCAATTACCGAGATGGAATGGGGCGAGTCCTTGCTCAAGATGTATATGCAAAAGACAACCTACCCCCATTCCCTGCATCAGTAAAAGATGGCTATGCTGTTCGAGCTGCTGATGGTCCAGGGGATCGTTTCATCATTGGGGAATCCCAAGCTGGTGAGCAGCCAACTCAGACAGTAATGCCAGGACAAGTGATGCGGGTTACAACAGGTGCTCCAATCCCCTGCGGTGCTGATGCAGTAGTGCAAGTTGAAGATACT…	MSNTKSHSAVDITKVARRHRMSPFPLTSMDKAFITVLEMTPVLGTEIINYRDGMGRVLAQDVYAKDNLPPFPASVKDGYAVRAADGPGDRFIIGESQAGEQPTQTVMPGQVMRVTTGAPIPCGADAVVQVEDTELIRESDDGTEELEVRILVQARPGQDIRPIGHDIKRGECVLAKGTHMGPSEIGLLATVGVTEVEVNKFPVVAVMSTGNELLNPEDDLLPGKIRDSNRSTLLATIQEHGYPTINLGIVGDNPDDLLNALNEGISRADVIITSGGVSMGEKDYLKQVLDIDLHAQIHFGRVFMKPGLPTTFATLDIDGVRKIIFALPGNPVSAVVTCNLFVVPALRKMQGILDPRPTIIKARVIR	lcl|GPHN_220:895-1995_ORF1_GPHN_220:894:1994	['GPHN_220_ORF1']
	ORF2	305	32.74	GPHN	PTC	ATGGCGACCGAGGGA	ATGGCGACCGAGGGAATGATCCTCACCAACCACGACCATCAAATCCGTGTCGGAGTCCTCACAGTGAGTGATAGCTGCTTCAGGAATCTTGCAGAAGACCGCAGTGGGATAAATCTAAAAGATCTTGTCCAAGATCCTTCTTTGTTGGGTGGGACTATATCGGCATACAAGATAGTACCAGATGAAATAGAAGAAATCAAGGAAACACTCATAGACTGGTGTGATGAAAAGGAACTTAATTTAATATTAACAACTGGAGGAACGGGGTTTGCACCACGAGATGTCACTCCAGAGAAATTCCCAACATTCCCATTTTGTGGGCTCCAGAAAGGGGCCACAAAAGAAGTAATAGAGCGGGAAGCGCCAGGGATGGCCCTGGCAATGCTGATGGGATCGCTC…	MATEGMILTNHDHQIRVGVLTVSDSCFRNLAEDRSGINLKDLVQDPSLLGGTISAYKIVPDEIEEIKETLIDWCDEKELNLILTTGGTGFAPRDVTPEKFPTFPFCGLQKGATKEVIEREAPGMALAMLMGSLNVTPLGMLSRPVCGIRGKTLIINLPGSKKGSQECFQFILPALPHAIDLLRDAIVKVKEVHDELEDLPSPPPPLSPPPTTSPHKQTEDKGVQCEEEEEEKKDSGVASTEDSSSSHITAAALAAKIPDSIISRGVQVLPRDTASLSTTPSESPRAQATSRLSTASCPTPKVTVL	lcl|GPHN_220:8-925_ORF2_GPHN_220:7:924	['GPHN_100_ORF2', 'GPHN_220_ORF2']
GPHN_221	ORF1	535	57.9	GPHN	E40	ATGGCCCTGGCAATG	ATGGCCCTGGCAATGCTGATGGGATCGCTCAATGTCACACCTCTGGGCATGCTCTCTAGACCAGTGTGTGGAATAAGGGGGAAAACTCTGATAATTAACCTACCTGGTAGCAAGAAAGGATCTCAGATTCCAGACTCCATCATTTCTCGTGGTGTTCAGGTGCTCCCACGAGACACAGCCTCCCTTAGCACTACTCCTTCAGAATCGCCCCGTGCTCAGGCTACATCTCGCCTCTCTACAGCTTCTTGTCCAACACCAAAAGTCCAGTCCAGGTGCAGCAGCAAGGAGAACATTCTAAGAGCCAGTCACAGTGCTGTAGATATCACCAAGGTGGCTAGAAGACATCGCATGTCTCCTTTTCCCCTGACGTCTATGGACAAAGCCTTCATTACAGTCCTG…	MALAMLMGSLNVTPLGMLSRPVCGIRGKTLIINLPGSKKGSQIPDSIISRGVQVLPRDTASLSTTPSESPRAQATSRLSTASCPTPKVQSRCSSKENILRASHSAVDITKVARRHRMSPFPLTSMDKAFITVLEMTPVLGTEIINYRDGMGRVLAQDVYAKDNLPPFPASVKDGYAVRAADGPGDRFIIGESQAGEQPTQTVMPGQVMRVTTGAPIPCGADAVVQVEDTELIRESDDGTEELEVRILVQARPGQDIRPIGHDIKRGECVLAKGTHMGPSEIGLLATVGVTEVEVNKFPVVAVMSTGNELLNPEDDLLPGKIRDSNRSTLLATIQEHGYPTINLGIVGDNPDDLLNALNEGISRADVIITSGGVSMGEKDYLKQVLDIDLHAQIHFGRVF…	lcl|GPHN_221:446-2053_ORF1_GPHN_221:445:2052	['GPHN_221_ORF1', 'GPHN_96_ORF1']
GPHN_222	ORF1	689	74.6	GPHN	E40	TTGTTGGGTGGGACT	TTGTTGGGTGGGACTATATCGGCATACAAGATAGTACCAGATGAAATAGAAGAAATCAAGGAAACACTCATAGACTGGTGTGATGAAAAGGAACTTAATTTAATATTAACAACTGGAGGAACGGGGTTTGCACCACGAGATGTCACTCCAGAGGCCACAAAAGAAGTAATAGAGCGGGAAGCGCCAGGGATGGCCCTGGCAATGCTGATGGGATCGCTCAATGTCACACCTCTGGGCATGCTCTCTAGACCAGTGTGTGGAATAAGGGGGAAAACTCTGATAATTAACCTACCTGGTAGCAAGAAAGGATCTCAGGAATGCTTTCAGTTCATACTGCCAGCTCTACCTCATGCCATTGACCTTTTACGTGATGCCATTGTAAAAGTAAAGGAGGTGCAT…	MLGGTISAYKIVPDEIEEIKETLIDWCDEKELNLILTTGGTGFAPRDVTPEATKEVIEREAPGMALAMLMGSLNVTPLGMLSRPVCGIRGKTLIINLPGSKKGSQECFQFILPALPHAIDLLRDAIVKVKEVHDELEDLPSPPPPLSPPPTTSPHKQTEDKGVQCEEEEEEKKDSGVASTEDSSSSHITAAALAAKIPDSIISRGVQVLPRDTASLSTTPSESPRAQATSRLSTASCPTPKVQSRCSSKENILRASHSAVDITKVARRHRMSPFPLTSMDKAFITVLEMTPVLGTEIINYRDGMGRVLAQDVYAKDNLPPFPASVKDGYAVRAADGPGDRFIIGESQAGEQPTQTVMPGQVMRVTTGAPIPCGADAVVQVEDTELIRESDDGTEELEVR…	lcl|GPHN_222:229-2298_ORF1_GPHN_222:228:2297	['GPHN_222_ORF1']
GPHN_223	ORF1	290	31.72	GPHN	E40	TTGAAGATACTGAAC	TTGAAGATACTGAACTCATCAGGGAATCAGATGATACCCATCGGCCATGACATTAAGAGAGGGGAGTGTGTTTTGGCCAAAGGAACCCATATGGGCCCTTCAGAGATTGGTCTCCTTGCAACTGTGGGTGTCACAGAAGTGGAAGTTAATAAGTTTCCAGTGGTTGCCGTTATGTCAACAGGGAATGAGCTGCTAAATCCTGAAGATGATCTCTTACCAGGAAAGATTCGGGACAGCAATCGATCAACACTTCTAGCAACAATTCAGGAACATGGTTACCCAACAATCAACCTGGGAATTGTAGGAGACAACCCAGATGACTTACTCAATGCCTTGAATGAGGGTATCAGCCGTGCTGATGTCATCATCACGTCAGGAGGTGTGTCCATGGGGGAAAAG…	MKILNSSGNQMIPIGHDIKRGECVLAKGTHMGPSEIGLLATVGVTEVEVNKFPVVAVMSTGNELLNPEDDLLPGKIRDSNRSTLLATIQEHGYPTINLGIVGDNPDDLLNALNEGISRADVIITSGGVSMGEKDYLKQVLDIDLHAQIHFGRVFMKPGLPTTFATLDIDGVRKIIFALPGNPVSAVVTCNLFVVPALRKMQGILDPRPTIIKARLSCDVKLDPRPEYHRCILTWHHQEPLPWAQSTGNQMSSRLMSMRSANGLLMLPPKTEQYVELHKGEVVDVMVIGRL	lcl|GPHN_223:213-1085_ORF1_GPHN_223:212:1084	['GPHN_204_ORF2', 'GPHN_223_ORF1', 'GPHN_224_ORF2']
GPHN_224	ORF1	431	46.82	GPHN	PTC	CTGCTTCAGGAATCT	CTGCTTCAGGAATCTTGCAGAAGACCGCAGTGGGATAAATCTAAAAGATCTTGTCCAAGATCCTTCTTTGAAACACTCATAGACTGGTGTGATGAAAAGGAACTTAATTTAATATTAACAACTGGAGGAACGGGGTTTGCACCACGAGATGTCACTCCAGAGGCCACAAAAGAAGTAATAGAGCGGGAAGCGCCAGGGATGGCCCTGGCAATGCTGATGGGATCGCTCAATGTCACACCTCTGGGCATGCTCTCTAGACCAGTGTGTGGAATAAGGGGGAAAACTCTGATAATTAACCTACCTGGTAGCAAGAAAGGATCTCAGGAATGCTTTCAGTTCATACTGCCAGCTCTACCTCATGCCATTGACCTTTTACGTGATGCCATTGTAAAAGTAAAG…	MLQESCRRPQWDKSKRSCPRSFFETLIDWCDEKELNLILTTGGTGFAPRDVTPEATKEVIEREAPGMALAMLMGSLNVTPLGMLSRPVCGIRGKTLIINLPGSKKGSQECFQFILPALPHAIDLLRDAIVKVKEVHDELEDLPSPPPPLSPPPTTSPHKQTEDKGVQCEEEEEEKKDSGVASTEDSSSSHITAAALAAKIPDSIISRGVQVLPRDTASLSTTPSESPRAQATSRLSTASCPTPKQIRRPDESKGVASRVGSLKYLLSLGDFVHKTFKVQSRCSSKENILRASHSAVDITKVARRHRMSPFPLTSMDKAFITVLEMTPVLGTEIINYRDGMGRVLAQDVYAKDNLPPFPASVKDGYAVRAADGPGDRFIIGESQAGEQPTQTVMPGQVMR…	lcl|GPHN_224:82-1377_ORF1_GPHN_224:81:1376	['GPHN_224_ORF1']
	ORF2	290	31.72	GPHN	E40	TTGAAGATACTGAAC	TTGAAGATACTGAACTCATCAGGGAATCAGATGATACCCATCGGCCATGACATTAAGAGAGGGGAGTGTGTTTTGGCCAAAGGAACCCATATGGGCCCTTCAGAGATTGGTCTCCTTGCAACTGTGGGTGTCACAGAAGTGGAAGTTAATAAGTTTCCAGTGGTTGCCGTTATGTCAACAGGGAATGAGCTGCTAAATCCTGAAGATGATCTCTTACCAGGAAAGATTCGGGACAGCAATCGATCAACACTTCTAGCAACAATTCAGGAACATGGTTACCCAACAATCAACCTGGGAATTGTAGGAGACAACCCAGATGACTTACTCAATGCCTTGAATGAGGGTATCAGCCGTGCTGATGTCATCATCACGTCAGGAGGTGTGTCCATGGGGGAAAAG…	MKILNSSGNQMIPIGHDIKRGECVLAKGTHMGPSEIGLLATVGVTEVEVNKFPVVAVMSTGNELLNPEDDLLPGKIRDSNRSTLLATIQEHGYPTINLGIVGDNPDDLLNALNEGISRADVIITSGGVSMGEKDYLKQVLDIDLHAQIHFGRVFMKPGLPTTFATLDIDGVRKIIFALPGNPVSAVVTCNLFVVPALRKMQGILDPRPTIIKARLSCDVKLDPRPEYHRCILTWHHQEPLPWAQSTGNQMSSRLMSMRSANGLLMLPPKTEQYVELHKGEVVDVMVIGRL	lcl|GPHN_224:1328-2200_ORF2_GPHN_224:1327:2199	['GPHN_204_ORF2', 'GPHN_223_ORF1', 'GPHN_224_ORF2']
GPHN_225	ORF1	553	59.37	GPHN	E40	ATGGCGACCGAGGGA	ATGGCGACCGAGGGAATGATCCTCACCAACCACGACCATCAAATCCGTGTCGGAGTCCTCACAGTGAGTGATAGCTGCTTCAGGAATCTTGCAGAAGACCGCAGTGGGATAAATCTAAAAGATCTTGTCCAAGATCCTTCTTTGTTGGGTGGGACTATATCGGCATACAAGATAGTACCAGATGAAATAGAAGAAATCAAGGAAACACTCATAGACTGGTGTGATGAAAAGGAACTTAATTTAATATTAACAACTGGAGGAACGGGGTTTGCACCACGAGATGTCACTCCAGAGGCCACAAAAGAAGTAATAGAGCGGGAAGCGCCAGGGATGGCCCTGGCAATGCTGATGGGATCGCTCAATGTCACACCTCTGGGCATGCTCTCTAGACCAGTGTGT…	MATEGMILTNHDHQIRVGVLTVSDSCFRNLAEDRSGINLKDLVQDPSLLGGTISAYKIVPDEIEEIKETLIDWCDEKELNLILTTGGTGFAPRDVTPEATKEVIEREAPGMALAMLMGSLNVTPLGMLSRPVCGIRGKTLIINLPGSKKGSQECFQFILPALPHAIDLLRDAIVKVKEVHDELEDLPSPPPPLSPPPTTSPHKQTEDKGVQCEEEEEEKKDSGVASTEDSSSSHITAAALAAKIPDSIISRGVQVLPRDTASLSTTPSESPRAQATSRLSTASCPTPKPTQTVMPGQVMRVTTGAPIPCGADAVVQVEDTELIRESDDGTEELEVRILVQARPGQDIRPIGHDIKRGECVLAKGTHMGPSEIGLLATVGVTEVEVNKFPVVAVMSTGNE…	lcl|GPHN_225:8-1669_ORF1_GPHN_225:7:1668	['GPHN_225_ORF1']
GPHN_226	ORF1	715	77.47	GPHN	E40	ATGAGTGATAGCTGC	ATGAGTGATAGCTGCTTCAGGAATCTTGCAGAAGACCGCAGTGGGATAAATCTAAAAGATCTTGTCCAAGATCCTTCTTTGTTGGGTGGGACTATATCGGCATACAAGATAGTACCAGATGAAATAGAAGAAATCAAGGAAACACTCATAGACTGGTGTGATGAAAAGGAACTTAATTTAATATTAACAACTGGAGGAACGGGGTTTGCACCACGAGATGTCACTCCAGAGGCCACAAAAGAAGTAATAGAGCGGGAAGCGCCAGGGATGGCCCTGGCAATGCTGATGGGATCGCTCAATGTCACACCTCTGGGCATGCTCTCTAGACCAGTGTGTGGAATAAGGGGGAAAACTCTGATAATTAACCTACCTGGTAGCAAGAAAGGATCTCAGGAATGC…	MSDSCFRNLAEDRSGINLKDLVQDPSLLGGTISAYKIVPDEIEEIKETLIDWCDEKELNLILTTGGTGFAPRDVTPEATKEVIEREAPGMALAMLMGSLNVTPLGMLSRPVCGIRGKTLIINLPGSKKGSQECFQFILPALPHAIDLLRDAIVKVKEVHDELEDLPSPPPPLSPPPTTSPHKQTEDKGVQCEEEEEEKKDSGVASTEDSSSSHITAAALAAKIPDSIISRGVQVLPRDTASLSTTPSESPRAQATSRLSTASCPTPKVQSRCSSKENILRASHSAVDITKVARRHRMSPFPLTSMDKAFITVLEMTPVLGTEIINYRDGMGRVLAQDVYAKDNLPPFPASVKDGYAVRAADGPGDRFIIGESQAGEQPTQTVMPGQVMRVTTGAPIPCG…	lcl|GPHN_226:158-2305_ORF1_GPHN_226:157:2304	['GPHN_226_ORF1']
GPHN_227	ORF1	297	32.23	GPHN	PTC	ATGGCGACCGAGGGA	ATGGCGACCGAGGGAATGATCCTCACCAACCACGACCATCAAATCCGTGTCGGAGTCCTCACAGTGAGTGATAGCTGCTTCAGGAATCTTGCAGAAGACCGCAGTGGGATAAATCTAAAAGATCTTGTCCAAGATCCTTCTTTGTTGGGTGGGACTATATCGGCATACAAGATAGTACCAGATGAAATAGAAGAAATCAAGGAAACACTCATAGACTGGTGTGATGAAAAGGAACTTAATTTAATATTAACAACTGGAGGAACGGGGTTTGCACCACGAGATGTCACTCCAGAGGCCACAAAAGAAGTAATAGAGCGGGAAGCGCCAGGGATGGCCCTGGCAATGCTGATGGGATCGCTCAATGTCACACCTCTGGGCATGCTCTCTAGACCAGTGTGT…	MATEGMILTNHDHQIRVGVLTVSDSCFRNLAEDRSGINLKDLVQDPSLLGGTISAYKIVPDEIEEIKETLIDWCDEKELNLILTTGGTGFAPRDVTPEATKEVIEREAPGMALAMLMGSLNVTPLGMLSRPVCGIRGKTLIINLPGSKKGSQECFQFILPALPHAIDLLRDAIVKVKEVHDELEDLPSPPPPLSPPPTTSPHKQTEDKGVQCEEEEEEKKDSGVASTEDSSSSHITAAALAAKKHPFYTSPALFMANHGQPIPGLISYSHHATGSADKRIPCIWSYVEAFHLNLVLC	lcl|GPHN_227:8-901_ORF1_GPHN_227:7:900	['GPHN_227_ORF1']
	ORF2	419	45.61	GPHN	E40	ATGTCTCCTTTTCCC	ATGTCTCCTTTTCCCCTGACGTCTATGGACAAAGCCTTCATTACAGTCCTGGAGATGACTCCGGTGCTTGGTACAGAAATCATCAATTACCGAGATGGAATGGGGCGAGTCCTTGCTCAAGATGTATATGCAAAAGACAACCTACCCCCATTCCCTGCATCAGTAAAAGATGGCTATGCTGTTCGAGCTGCTGATGGTCCAGGGGATCGTTTCATCATTGGGGAATCCCAAGCTGGTGAGCAGCCAACTCAGACAGTAATGCCAGGACAAGTGATGCGGGTTACAACAGGTGCTCCAATCCCCTGCGGTGCTGATGCAGTAGTGCAAGTTGAAGATACTGAACTCATCAGGGAATCAGATGATGGTACTGAAGAACTTGAAGTACGAATTCTGGTGCAA…	MSPFPLTSMDKAFITVLEMTPVLGTEIINYRDGMGRVLAQDVYAKDNLPPFPASVKDGYAVRAADGPGDRFIIGESQAGEQPTQTVMPGQVMRVTTGAPIPCGADAVVQVEDTELIRESDDGTEELEVRILVQARPGQDIRPIGHDIKRGECVLAKGTHMGPSEIGLLATVGVTEVEVNKFPVVAVMSTGNELLNPEDDLLPGKIRDSNRSTLLATIQEHGYPTINLGIVGDNPDDLLNALNEGISRADVIITSGGVSMGEKDYLKQVLDIDLHAQIHFGRVFMKPGLPTTFATLDIDGVRKIIFALPGNPVSAVVTCNLFVVPALRKMQGILDPRPTIIKARLSCDVKLDPRPEYHRCILTWHHQEPLPWAQSTGNQMSSRLMSMRSANGLLMLPPKT…	lcl|GPHN_227:1227-2486_ORF2_GPHN_227:1226:2485	['GPHN_110_ORF1', 'GPHN_15_ORF1', 'GPHN_173_ORF1', 'GPHN_192_ORF2', 'GPHN_209_ORF3', 'GPHN_227_ORF2', 'GPHN_228_ORF2', 'GPHN_257_ORF1', 'GPHN_264_ORF2', 'GPHN_265_ORF2', 'GPHN_268_ORF2', 'GPHN_30_ORF1', 'GPHN_36_ORF1', 'GPHN_52_ORF1', 'GPHN_80_ORF2']
GPHN_228	ORF1	261	28.32	GPHN	PTC	ATGGCGACCGAGGGA	ATGGCGACCGAGGGAATGATCCTCACCAACCACGACCATCAAATCCGTGTCGGAGTCCTCACAGTGAGTGATAGCTGCTTCAGGAATCTTGCAGAAGACCGCAGTGGGATAAATCTAAAAGATCTTGTCCAAGATCCTTCTTTGTTGGGTGGGACTATATCGGCATACAAGATAGTACCAGATGAAATAGAAGAAATCAAGGAAACACTCATAGACTGGTGTGATGAAAAGGAACTTAATTTAATATTAACAACTGGAGGAACGGGGTTTGCACCACGAGATGTCACTCCAGAGGCCACAAAAGAAGTAATAGAGCGGGAAGCGCCAGGGATGGCCCTGGCAATGCTGATGGGATCGCTCAATGTCACACCTCTGGGCATGCTCTCTAGACCAGTGTGT…	MATEGMILTNHDHQIRVGVLTVSDSCFRNLAEDRSGINLKDLVQDPSLLGGTISAYKIVPDEIEEIKETLIDWCDEKELNLILTTGGTGFAPRDVTPEATKEVIEREAPGMALAMLMGSLNVTPLGMLSRPVCGIRGKTLIINLPGSKKGSQECFQFILPALPHAIDLLRDAIVKVKEVHDELEDLPSPPPPLSPPPTTSPHKQTEDKGVQCEEEEEEKKDSGVASTEDSSSSHITAAALAAKIPCIWSYVEAFHLNLVLC	lcl|GPHN_228:8-793_ORF1_GPHN_228:7:792	['GPHN_228_ORF1']
	ORF2	419	45.61	GPHN	E40	ATGTCTCCTTTTCCC	ATGTCTCCTTTTCCCCTGACGTCTATGGACAAAGCCTTCATTACAGTCCTGGAGATGACTCCGGTGCTTGGTACAGAAATCATCAATTACCGAGATGGAATGGGGCGAGTCCTTGCTCAAGATGTATATGCAAAAGACAACCTACCCCCATTCCCTGCATCAGTAAAAGATGGCTATGCTGTTCGAGCTGCTGATGGTCCAGGGGATCGTTTCATCATTGGGGAATCCCAAGCTGGTGAGCAGCCAACTCAGACAGTAATGCCAGGACAAGTGATGCGGGTTACAACAGGTGCTCCAATCCCCTGCGGTGCTGATGCAGTAGTGCAAGTTGAAGATACTGAACTCATCAGGGAATCAGATGATGGTACTGAAGAACTTGAAGTACGAATTCTGGTGCAA…	MSPFPLTSMDKAFITVLEMTPVLGTEIINYRDGMGRVLAQDVYAKDNLPPFPASVKDGYAVRAADGPGDRFIIGESQAGEQPTQTVMPGQVMRVTTGAPIPCGADAVVQVEDTELIRESDDGTEELEVRILVQARPGQDIRPIGHDIKRGECVLAKGTHMGPSEIGLLATVGVTEVEVNKFPVVAVMSTGNELLNPEDDLLPGKIRDSNRSTLLATIQEHGYPTINLGIVGDNPDDLLNALNEGISRADVIITSGGVSMGEKDYLKQVLDIDLHAQIHFGRVFMKPGLPTTFATLDIDGVRKIIFALPGNPVSAVVTCNLFVVPALRKMQGILDPRPTIIKARLSCDVKLDPRPEYHRCILTWHHQEPLPWAQSTGNQMSSRLMSMRSANGLLMLPPKT…	lcl|GPHN_228:1119-2378_ORF2_GPHN_228:1118:2377	['GPHN_110_ORF1', 'GPHN_15_ORF1', 'GPHN_173_ORF1', 'GPHN_192_ORF2', 'GPHN_209_ORF3', 'GPHN_227_ORF2', 'GPHN_228_ORF2', 'GPHN_257_ORF1', 'GPHN_264_ORF2', 'GPHN_265_ORF2', 'GPHN_268_ORF2', 'GPHN_30_ORF1', 'GPHN_36_ORF1', 'GPHN_52_ORF1', 'GPHN_80_ORF2']
GPHN_229	ORF1	465	51.03	GPHN	E40	TTGGAAGGGCTTAAA	TTGGAAGGGCTTAAAGATGAACTCTGGAGGAATAGAGGCTACGACTTAAGAGTCCAGTCCAGGTGCAGCAGCAAGGAGAACATTCTAAGAGCCAGTCACAGTGCTGTAGATATCACCAAGGTGGCTAGAAGACATCGCATGTCTCCTTTTCCCCTGACGTCTATGGACAAAGCCTTCATTACAGTCCTGGAGATGACTCCGGTGCTTGGTACAGAAATCATCAATTACCGAGATGGAATGGGGCGAGTCCTTGCTCAAGATGTATATGCAAAAGACAACCTACCCCCATTCCCTGCATCAGTAAAAGATGGCTATGCTGTTCGAGCTGCTGATGGTCCAGGGGATCGTTTCATCATTGGGGAATCCCAAGCTGGTGAGCAGCCAACTCAGACAGTAATG…	MEGLKDELWRNRGYDLRVQSRCSSKENILRASHSAVDITKVARRHRMSPFPLTSMDKAFITVLEMTPVLGTEIINYRDGMGRVLAQDVYAKDNLPPFPASVKDGYAVRAADGPGDRFIIGESQAGEQPTQTVMPGQVMRVTTGAPIPCGADAVVQVEDTELIRESDDGTEELEVRILVQARPGQDIRPIGHDIKRGECVLAKGTHMGPSEIGLLATVGVTEVEVNKFPVVAVMSTGNELLNPEDDLLPGKIRDSNRSTLLATIQEHGYPTINLGIVGDNPDDLLNALNEGISRADVIITSGGVSMGEKDYLKQVLDIDLHAQIHFGRVFMKPGLPTTFATLDIDGVRKIIFALPGNPVSAVVTCNLFVVPALRKMQGILDPRPTIIKARLSCDVKLDPR…	lcl|GPHN_229:1012-2409_ORF1_GPHN_229:1011:2408	['GPHN_167_ORF2', 'GPHN_229_ORF1', 'GPHN_239_ORF1']
	ORF2	350	37.62	GPHN	PTC	ATGGCGACCGAGGGA	ATGGCGACCGAGGGAATGATCCTCACCAACCACGACCATCAAATCCGTGTCGGAGTCCTCACAGTGAGTGATAGCTGCTTCAGGAATCTTGCAGAAGACCGCAGTGGGATAAATCTAAAAGATCTTGTCCAAGATCCTTCTTTGTTGGGTGGGACTATATCGGCATACAAGATAGTACCAGATGAAATAGAAGAAATCAAGGAAACACTCATAGACTGGTGTGATGAAAAGGAACTTAATTTAATATTAACAACTGGAGGAACGGGGTTTGCACCACGAGATGTCACTCCAGAGGCCACAAAAGAAGTAATAGAGCGGGAAGCGCCAGGGATGGCCCTGGCAATGCTGATGGGATCGCTCAATGTCACACCTCTGGGCATGCTCTCTAGACCAGTGTGT…	MATEGMILTNHDHQIRVGVLTVSDSCFRNLAEDRSGINLKDLVQDPSLLGGTISAYKIVPDEIEEIKETLIDWCDEKELNLILTTGGTGFAPRDVTPEATKEVIEREAPGMALAMLMGSLNVTPLGMLSRPVCGIRGKTLIINLPGSKKGSQECFQFILPALPHAIDLLRDAIVKVKEVHDELEDLPSPPPPLSPPPTTSPHKQTEDKGVQCEEEEEEKKDSGVASTEDSSSSHITAAALAAKIPDSIISRGVQVLPRDTASLSTTPSESPRAQATSRLSTASCPTPKQIRRPDESKGVASRVGSLKYLLSLGDFVHKTFKLFEIGGSKLSSTLDWKGLKMNSGGIEATT	lcl|GPHN_229:8-1060_ORF2_GPHN_229:7:1059	['GPHN_229_ORF2']
GPHN_230	ORF1	622	66.88	GPHN	PTC	ATGGCGACCGAGGGA	ATGGCGACCGAGGGAATGATCCTCACCAACCACGACCATCAAATCCGTGTCGGAGTCCTCACAGTGAGTGATAGCTGCTTCAGGAATCTTGCAGAAGACCGCAGTGGGATAAATCTAAAAGATCTTGTCCAAGATCCTTCTTTGTTGGGTGGGACTATATCGGCATACAAGATAGTACCAGATGAAATAGAAGAAATCAAGGAAACACTCATAGACTGGTGTGATGAAAAGGAACTTAATTTAATATTAACAACTGGAGGAACGGGGTTTGCACCACGAGATGTCACTCCAGAGGCCACAAAAGAAGTAATAGAGCGGGAAGCGCCAGGGATGGCCCTGGCAATGCTGATGGGATCGCTCAATGTCACACCTCTGGGCATGCTCTCTAGACCAGTGTGT…	MATEGMILTNHDHQIRVGVLTVSDSCFRNLAEDRSGINLKDLVQDPSLLGGTISAYKIVPDEIEEIKETLIDWCDEKELNLILTTGGTGFAPRDVTPEATKEVIEREAPGMALAMLMGSLNVTPLGMLSRPVCGIRGKTLIINLPGSKKGSQECFQFILPALPHAIDLLRDAIVKVKEVHDELEDLPSPPPPLSPPPTTSPHKQTEDKGVQCEEEEEEKKDSGVASTEDSSSSHITAAALAAKIPDSIISRGVQVLPRDTASLSTTPSESPRAQATSRLSTASCPTPKQIRRPDESKGVASRVGSLKYLLSLGDFVHKTFKVQSRCSSKENILRASHSAVDITKVARRHRMSPFPLTSMDKAFITVLEMTPVLGTEIINYRDGMGRVLAQDVYAKDNLP…	lcl|GPHN_230:8-1876_ORF1_GPHN_230:7:1875	['GPHN_230_ORF1']
	ORF2	153	17.12	GPHN	E40	ATGAGGGTATCAGCC	ATGAGGGTATCAGCCGTGCTGATGTCATCATCACGTCAGGAGGTGTGTCCATGGGGGAAAAGCTTGCCAACAACATTTGCAACTTTGGATATTGATGGTGTAAGAAAAATTATTTTTGCACTACCAGGGAATCCTGTATCAGCTGTGGTCACCTGCAACCTCTTTGTTGTACCTGCACTGAGAAAGATGCAGGGTATCTTGGATCCTCGGCCAACCATCATCAAAGCCAGGTTATCGTGTGATGTAAAACTGGACCCTCGCCCAGAATACCACCGGTGTATACTGACTTGGCATCACCAAGAACCACTGCCCTGGGCCCAGAGTACAGGTAATCAGATGAGCAGCCGTCTGATGAGCATGCGCAGTGCCAATGGATTATTGATGCTACCTCCAAAGACA…	MRVSAVLMSSSRQEVCPWGKSLPTTFATLDIDGVRKIIFALPGNPVSAVVTCNLFVVPALRKMQGILDPRPTIIKARLSCDVKLDPRPEYHRCILTWHHQEPLPWAQSTGNQMSSRLMSMRSANGLLMLPPKTEQYVELHKGEVVDVMVIGRL	lcl|GPHN_230:1782-2243_ORF2_GPHN_230:1781:2242	['GPHN_230_ORF2', 'GPHN_232_ORF2']
GPHN_231	ORF1	682	73.47	GPHN	E40	ATGGCGACCGAGGGA	ATGGCGACCGAGGGAATGATCCTCACCAACCACGACCATCAAATCCGTGTCGGAGTCCTCACAGTGAGTGATAGCTGCTTCAGGAATCTTGCAGAAGACCGCAGTGGGATAAATCTAAAAGATCTTGTCCAAGATCCTTCTTTGTTGGGTGGGACTATATCGGCATACAAGATAGTACCAGATGAAATAGAAGAAATCAAGGAAACACTCATAGACTGGTGTGATGAAAAGGAACTTAATTTAATATTAACAACTGGAGGAACGGGGTTTGCACCACGAGATGTCACTCCAGAGGCCACAAAAGAAGTAATAGAGCGGGAAGCGCCAGGGATGGCCCTGGCAATGCTGATGGGATCGCTCAATGTCACACCTCTGGGCATGCTCTCTAGACCAGTGTGT…	MATEGMILTNHDHQIRVGVLTVSDSCFRNLAEDRSGINLKDLVQDPSLLGGTISAYKIVPDEIEEIKETLIDWCDEKELNLILTTGGTGFAPRDVTPEATKEVIEREAPGMALAMLMGSLNVTPLGMLSRPVCGIRGKTLIINLPGSKKGSQECFQFILPALPHAIDLLRDAIVKVKEVHDELEDLPSPPPPLSPPPTTSPHKQTEDKGVQCEEEEEEKKDSGVASTEDSSSSHITAAALAAKIPDSIISRGVQVLPRDTASLSTTPSESPRAQATSRLSTASCPTPKVQSRCSSKENILRASHSAVDITKVARRHRMSPFPLTSMDKAFITVLEMTPVLGTEIINYRDGMGRVLAQDVYAKDNLPPFPASVKDGYAVRAADGPGDRFIIGESQAGEQP…	lcl|GPHN_231:8-2056_ORF1_GPHN_231:7:2055	['GPHN_231_ORF1']
GPHN_232	ORF1	589	63.16	GPHN	PTC	ATGGCGACCGAGGGA	ATGGCGACCGAGGGAATGATCCTCACCAACCACGACCATCAAATCCGTGTCGGAGTCCTCACAGTGAGTGATAGCTGCTTCAGGAATCTTGCAGAAGACCGCAGTGGGATAAATCTAAAAGATCTTGTCCAAGATCCTTCTTTGTTGGGTGGGACTATATCGGCATACAAGATAGTACCAGATGAAATAGAAGAAATCAAGGAAACACTCATAGACTGGTGTGATGAAAAGGAACTTAATTTAATATTAACAACTGGAGGAACGGGGTTTGCACCACGAGATGTCACTCCAGAGGCCACAAAAGAAGTAATAGAGCGGGAAGCGCCAGGGATGGCCCTGGCAATGCTGATGGGATCGCTCAATGTCACACCTCTGGGCATGCTCTCTAGACCAGTGTGT…	MATEGMILTNHDHQIRVGVLTVSDSCFRNLAEDRSGINLKDLVQDPSLLGGTISAYKIVPDEIEEIKETLIDWCDEKELNLILTTGGTGFAPRDVTPEATKEVIEREAPGMALAMLMGSLNVTPLGMLSRPVCGIRGKTLIINLPGSKKGSQECFQFILPALPHAIDLLRDAIVKVKEVHDELEDLPSPPPPLSPPPTTSPHKQTEDKGVQCEEEEEEKKDSGVASTEDSSSSHITAAALAAKIPDSIISRGVQVLPRDTASLSTTPSESPRAQATSRLSTASCPTPKVQSRCSSKENILRASHSAVDITKVARRHRMSPFPLTSMDKAFITVLEMTPVLGTEIINYRDGMGRVLAQDVYAKDNLPPFPASVKDGYAVRAADGPGDRFIIGESQAGEQP…	lcl|GPHN_232:8-1777_ORF1_GPHN_232:7:1776	['GPHN_232_ORF1']
	ORF2	153	17.12	GPHN	E40	ATGAGGGTATCAGCC	ATGAGGGTATCAGCCGTGCTGATGTCATCATCACGTCAGGAGGTGTGTCCATGGGGGAAAAGCTTGCCAACAACATTTGCAACTTTGGATATTGATGGTGTAAGAAAAATTATTTTTGCACTACCAGGGAATCCTGTATCAGCTGTGGTCACCTGCAACCTCTTTGTTGTACCTGCACTGAGAAAGATGCAGGGTATCTTGGATCCTCGGCCAACCATCATCAAAGCCAGGTTATCGTGTGATGTAAAACTGGACCCTCGCCCAGAATACCACCGGTGTATACTGACTTGGCATCACCAAGAACCACTGCCCTGGGCCCAGAGTACAGGTAATCAGATGAGCAGCCGTCTGATGAGCATGCGCAGTGCCAATGGATTATTGATGCTACCTCCAAAGACA…	MRVSAVLMSSSRQEVCPWGKSLPTTFATLDIDGVRKIIFALPGNPVSAVVTCNLFVVPALRKMQGILDPRPTIIKARLSCDVKLDPRPEYHRCILTWHHQEPLPWAQSTGNQMSSRLMSMRSANGLLMLPPKTEQYVELHKGEVVDVMVIGRL	lcl|GPHN_232:1683-2144_ORF2_GPHN_232:1682:2143	['GPHN_230_ORF2', 'GPHN_232_ORF2']
GPHN_233	ORF1	666	72.35	GPHN	E40	ATGGCGACCGAGGGA	ATGGCGACCGAGGGAATGATCCTCACCAACCACGACCATCAAATCCGTGTCGGAGTCCTCACAGTGAGTGATAGCTGCTTCAGGAATCTTGCAGAAGACCGCAGTGGGATAAATCTAAAAGATCTTGTCCAAGATCCTTCTTTGTTGGGTGGGACTATATCGGCATACAAGATAGTACCAGATGAAATAGAAGAAATCAAGGAAACACTCATAGACTGGTGTGATGAAAAGGAACTTAATTTAATATTAACAACTGGAGGAACGGGGTTTGCACCACGAGATGTCACTCCAGAGGCCACAAAAGAAGTAATAGAGCGGGAAGCGCCAGGGATGGCCCTGGCAATGCTGATGGGATCGCTCAATGTCACACCTCTGGGCATGCTCTCTAGACCAGTGTGT…	MATEGMILTNHDHQIRVGVLTVSDSCFRNLAEDRSGINLKDLVQDPSLLGGTISAYKIVPDEIEEIKETLIDWCDEKELNLILTTGGTGFAPRDVTPEATKEVIEREAPGMALAMLMGSLNVTPLGMLSRPVCGIRGKTLIINLPGSKKGSQECFQFILPALPHAIDLLRDAIVKVKEVHDELEDLPSPPPPLSPPPTTSPHKQTEDKGVQCEEEEEEKKDSGVASTEDSSSSHITAAALAAKIPDSIISRGVQVLPRDTASLSTTPSESPRAQATSRLSTASCPTPKVQSRCSSKENILRASHSAVDITKVARRHRMSPFPLTSMDKAFITVLEMTPVLGTEIINYRDGMGRVLAQDVYAKDNLPPFPASVKDGYAVRAADGPGDRFIIGESQAGEQP…	lcl|GPHN_233:8-2008_ORF1_GPHN_233:7:2007	['GPHN_233_ORF1']
	ORF2	104	12.29	unknown	PTC	TTGAAGATACTGAAC	TTGAAGATACTGAACTCATCAGGGAATCAGATGATGGTACTGAAGAACTTGAAGTACGAATTCTGGTGCAAGCTCGGCCAGGCCAAGATATCCGACCCATCGGCCATGACATTAAGAGAGGGGAGTGTGTTTTGGCCAAAGGAACCCATATGGGCCCTTCAGAGATTGGTCTCCTTGCAACTGTGGGTGTCACAGAAGTGGAAGTTAATAAGTTTCCAGTGGTTGCCGTTATGTCAACAGGGAATGAGGACTATCTCAAGCAGGTGCTGGACATTGATCTTCATGCTCAGATCCATTTTGGCAGAGTTTTTATGA	MKILNSSGNQMMVLKNLKYEFWCKLGQAKISDPSAMTLREGSVFWPKEPIWALQRLVSLQLWVSQKWKLISFQWLPLCQQGMRTISSRCWTLIFMLRSILAEFL	lcl|GPHN_233:1287-1601_ORF2_GPHN_233:1286:1600	['GPHN_233_ORF2']
GPHN_234	ORF1	371	40.12	GPHN	PTC	ATGGCGACCGAGGGA	ATGGCGACCGAGGGAATGATCCTCACCAACCACGACCATCAAATCCGTGTCGGAGTCCTCACAGTGAGTGATAGCTGCTTCAGGAATCTTGCAGAAGACCGCAGTGGGATAAATCTAAAAGATCTTGTCCAAGATCCTTCTTTGTTGGGTGGGACTATATCGGCATACAAGATAGTACCAGATGAAATAGAAGAAATCAAGGAAACACTCATAGACTGGTGTGATGAAAAGGAACTTAATTTAATATTAACAACTGGAGGAACGGGGTTTGCACCACGAGATGTCACTCCAGAGGCCACAAAAGAAGTAATAGAGCGGGAAGCGCCAGGGATGGCCCTGGCAATGCTGATGGGATCGCTCAATGTCACACCTCTGGGCATGCTCTCTAGACCAGTGTGT…	MATEGMILTNHDHQIRVGVLTVSDSCFRNLAEDRSGINLKDLVQDPSLLGGTISAYKIVPDEIEEIKETLIDWCDEKELNLILTTGGTGFAPRDVTPEATKEVIEREAPGMALAMLMGSLNVTPLGMLSRPVCGIRGKTLIINLPGSKKGSQECFQFILPALPHAIDLLRDAIVKVKEVHDELEDLPSPPPPLSPPPTTSPHKQTEDKGVQCEEEEEEKKDSGVASTEDSSSSHITAAALAAKIPDSIISRGVQVLPRDTASLSTTPSESPRAQATSRLSTASCPTPKVQSRCSSKENILRASHSAVDITKVARRHRMSPFPLTSMDKAFITVLEMTPVLGTEIINYRANSDSNARTSDAGYNRCSNPLRC	lcl|GPHN_234:8-1123_ORF1_GPHN_234:7:1122	['GPHN_234_ORF1']
	ORF2	347	37.88	GPHN	E40	TTGGTACAGAAATCA	TTGGTACAGAAATCATCAATTACCGAGCCAACTCAGACAGTAATGCCAGGACAAGTGATGCGGGTTACAACAGGTGCTCCAATCCCCTGCGGTGCTGATGCAGTAGTGCAAGTTGAAGATACTGAACTCATCAGGGAATCAGATGATGGTACTGAAGAACTTGAAGTACGAATTCTGGTGCAAGCTCGGCCAGGCCAAGATATCCGACCCATCGGCCATGACATTAAGAGAGGGGAGTGTGTTTTGGCCAAAGGAACCCATATGGGCCCTTCAGAGATTGGTCTCCTTGCAACTGTGGGTGTCACAGAAGTGGAAGTTAATAAGTTTCCAGTGGTTGCCGTTATGTCAACAGGGAATGAGCTGCTAAATCCTGAAGATGATCTCTTACCAGGAAAGATT…	MVQKSSITEPTQTVMPGQVMRVTTGAPIPCGADAVVQVEDTELIRESDDGTEELEVRILVQARPGQDIRPIGHDIKRGECVLAKGTHMGPSEIGLLATVGVTEVEVNKFPVVAVMSTGNELLNPEDDLLPGKIRDSNRSTLLATIQEHGYPTINLGIVGDNPDDLLNALNEGISRADVIITSGGVSMGEKDYLKQVLDIDLHAQIHFGRVFMKPGLPTTFATLDIDGVRKIIFALPGNPVSAVVTCNLFVVPALRKMQGILDPRPTIIKARLSCDVKLDPRPEYHRCILTWHHQEPLPWAQSTGNQMSSRLMSMRSANGLLMLPPKTEQYVELHKGEVVDVMVIGRL	lcl|GPHN_234:1026-2069_ORF2_GPHN_234:1025:2068	['GPHN_234_ORF2']
GPHN_235	ORF1	586	63.53	GPHN	E40	ATGGCGACCGAGGGA	ATGGCGACCGAGGGAATGATCCTCACCAACCACGACCATCAAATCCGTGTCGGAGTCCTCACAGTGAGTGATAGCTGCTTCAGGAATCTTGCAGAAGACCGCAGTGGGATAAATCTAAAAGATCTTGTCCAAGATCCTTCTTTGTTGGGTGGGACTATATCGGCATACAAGATAGTACCAGATGAAATAGAAGAAATCAAGGAAACACTCATAGACTGGTGTGATGAAAAGGAACTTAATTTAATATTAACAACTGGAGGAACGGGGTTTGCACCACGAGATGTCACTCCAGAGGCCACAAAAGAAGTAATAGAGCGGGAAGCGCCAGGGATGGCCCTGGCAATGCTGATGGGATCGCTCAATGTCACACCTCTGGGCATGCTCTCTAGACCAGTGTGT…	MATEGMILTNHDHQIRVGVLTVSDSCFRNLAEDRSGINLKDLVQDPSLLGGTISAYKIVPDEIEEIKETLIDWCDEKELNLILTTGGTGFAPRDVTPEATKEVIEREAPGMALAMLMGSLNVTPLGMLSRPVCGIRGKTLIINLPGSKKGSQECFQFILPALPHAIDLLRDAIVKVKEVHDELEDLPSPPPPLSPPPTTSPHKQTEDKGVQCEEEEEEKKDSGVASTEDSSSSHITAAALAAKIPDSIISRGVQVLPRDTASLSTTPSESPRAQATSRLSTASCPTPKGTEELEVRILVQARPGQDIRPIGHDIKRGECVLAKGTHMGPSEIGLLATVGVTEVEVNKFPVVAVMSTGNELLNPEDDLLPGKIRDSNRSTLLATIQEHGYPTINLGIVGD…	lcl|GPHN_235:8-1768_ORF1_GPHN_235:7:1767	['GPHN_235_ORF1']
	ORF2	125	14.72	unknown	PTC	CTGCAGCAGCTCTTG	CTGCAGCAGCTCTTGCTGCAAAGATTCCAGACTCCATCATTTCTCGTGGTGTTCAGGTGCTCCCACGAGACACAGCCTCCCTTAGCACTACTCCTTCAGAATCGCCCCGTGCTCAGGCTACATCTCGCCTCTCTACAGCTTCTTGTCCAACACCAAAAGGTACTGAAGAACTTGAAGTACGAATTCTGGTGCAAGCTCGGCCAGGCCAAGATATCCGACCCATCGGCCATGACATTAAGAGAGGGGAGTGTGTTTTGGCCAAAGGAACCCATATGGGCCCTTCAGAGATTGGTCTCCTTGCAACTGTGGGTGTCACAGAAGTGGAAGTTAATAAGTTTCCAGTGGTTGCCGTTATGTCAACAGGGAATGAGCTGCTAA	MQQLLLQRFQTPSFLVVFRCSHETQPPLALLLQNRPVLRLHLASLQLLVQHQKVLKNLKYEFWCKLGQAKISDPSAMTLREGSVFWPKEPIWALQRLVSLQLWVSQKWKLISFQWLPLCQQGMSC	lcl|GPHN_235:714-1091_ORF2_GPHN_235:713:1090	['GPHN_235_ORF2']
GPHN_236	ORF1	596	64.22	GPHN	PTC	ATGGCGACCGAGGGA	ATGGCGACCGAGGGAATGATCCTCACCAACCACGACCATCAAATCCGTGTCGGAGTCCTCACAGTGAGTGATAGCTGCTTCAGGAATCTTGCAGAAGACCGCAGTGGGATAAATCTAAAAGATCTTGTCCAAGATCCTTCTTTGTTGGGTGGGACTATATCGGCATACAAGATAGTACCAGATGAAATAGAAGAAATCAAGGAAACACTCATAGACTGGTGTGATGAAAAGGAACTTAATTTAATATTAACAACTGGAGGAACGGGGTTTGCACCACGAGATGTCACTCCAGAGGCCACAAAAGAAGTAATAGAGCGGGAAGCGCCAGGGATGGCCCTGGCAATGCTGATGGGATCGCTCAATGTCACACCTCTGGGCATGCTCTCTAGACCAGTGTGT…	MATEGMILTNHDHQIRVGVLTVSDSCFRNLAEDRSGINLKDLVQDPSLLGGTISAYKIVPDEIEEIKETLIDWCDEKELNLILTTGGTGFAPRDVTPEATKEVIEREAPGMALAMLMGSLNVTPLGMLSRPVCGIRGKTLIINLPGSKKGSQECFQFILPALPHAIDLLRDAIVKVKEVHDELEDLPSPPPPLSPPPTTSPHKQTEDKGVQCEEEEEEKKDSGVASTEDSSSSHITAAALAAKVQSRCSSKENILRASHSAVDITKVARRHRMSPFPLTSMDKAFITVLEMTPVLGTEIINYRDGMGRVLAQDVYAKDNLPPFPASVKDGYAVRAADGPGDRFIIGESQAGEQPTQTVMPGQVMRVTTGAPIPCGADAVVQVEDTELIRESDDGTEELE…	lcl|GPHN_236:8-1798_ORF1_GPHN_236:7:1797	['GPHN_236_ORF1']
GPHN_237	ORF1	653	71.06	GPHN	E40	ATGGCGACCGAGGGA	ATGGCGACCGAGGGAATGATCCTCACCAACCACGACCATCAAATCCGTGTCGGAGTCCTCACAGTGAGTGATAGCTGCTTCAGGAATCTTGCAGAAGACCGCAGTGGGATAAATCTAAAAGATCTTGTCCAAGATCCTTCTTTGTTGGGTGGGACTATATCGGCATACAAGATAGTACCAGATGAAATAGAAGAAATCAAGGAAACACTCATAGACTGGTGTGATGAAAAGGAACTTAATTTAATATTAACAACTGGAGGAACGGGGTTTGCACCACGAGATGTCACTCCAGAGGCCACAAAAGAAGTAATAGAGCGGGAAGCGCCAGGGATGGCCCTGGCAATGCTGATGGGATCGCTCAATGTCACACCTCTGGGCATGCTCTCTAGACCAGTGTGT…	MATEGMILTNHDHQIRVGVLTVSDSCFRNLAEDRSGINLKDLVQDPSLLGGTISAYKIVPDEIEEIKETLIDWCDEKELNLILTTGGTGFAPRDVTPEATKEVIEREAPGMALAMLMGSLNVTPLGMLSRPVCGIRGKTLIINLPGSKKGSQIPDSIISRGVQVLPRDTASLSTTPSESPRAQATSRLSTASCPTPKQIRRPDESKGVASRVGSLKYLLSLGDFVHKTFKLHSRLEGLKDELWRNRGYDLRVQSRCSSKENILRANGMGRVLAQDVYAKDNLPPFPASVKDGYAVRAADGPGDRFIIGESQAGEQPTQTVMPGQVMRVTTGAPIPCGADAVVQVEDTELIRESDDGTEELEVRILVQARPGQDIRPIGHDIKRGECVLAKGTHMGPSEI…	lcl|GPHN_237:8-1969_ORF1_GPHN_237:7:1968	['GPHN_237_ORF1']
	ORF2	105	12.17	unknown	PTC	CTGGTAGCAAGAAAG	CTGGTAGCAAGAAAGGATCTCAGATTCCAGACTCCATCATTTCTCGTGGTGTTCAGGTGCTCCCACGAGACACAGCCTCCCTTAGCACTACTCCTTCAGAATCGCCCCGTGCTCAGGCTACATCTCGCCTCTCTACAGCTTCTTGTCCAACACCAAAACAAATTAGACGGCCGGATGAAAGCAAAGGAGTTGCTAGTAGAGTTGGATCCCTCAAATATCTATTATCACTGGGAGATTTTGTACATAAAACATTTAAGCTCCACTCTAGATTGGAAGGGCTTAAAGATGAACTCTGGAGGAATAGAGGCTACGACTTAA	MVARKDLRFQTPSFLVVFRCSHETQPPLALLLQNRPVLRLHLASLQLLVQHQNKLDGRMKAKELLVELDPSNIYYHWEILYIKHLSSTLDWKGLKMNSGGIEATT	lcl|GPHN_237:441-758_ORF2_GPHN_237:440:757	['GPHN_141_ORF2', 'GPHN_165_ORF2', 'GPHN_237_ORF2', 'GPHN_26_ORF2', 'GPHN_272_ORF2']
GPHN_238	ORF1	491	52.55	GPHN	PTC	ATGGCGACCGAGGGA	ATGGCGACCGAGGGAATGATCCTCACCAACCACGACCATCAAATCCGTGTCGGAGTCCTCACAGTGAGTGATAGCTGCTTCAGGAATCTTGCAGAAGACCGCAGTGGGATAAATCTAAAAGATCTTGTCCAAGATCCTTCTTTGTTGGGTGGGACTATATCGGCATACAAGATAGTACCAGATGAAATAGAAGAAATCAAGGAAACACTCATAGACTGGTGTGATGAAAAGGAACTTAATTTAATATTAACAACTGGAGGAACGGGGTTTGCACCACGAGATGTCACTCCAGAGGCCACAAAAGAAGTAATAGAGCGGGAAGCGCCAGGGATGGCCCTGGCAATGCTGATGGGATCGCTCAATGTCACACCTCTGGGCATGCTCTCTAGACCAGTGTGT…	MATEGMILTNHDHQIRVGVLTVSDSCFRNLAEDRSGINLKDLVQDPSLLGGTISAYKIVPDEIEEIKETLIDWCDEKELNLILTTGGTGFAPRDVTPEATKEVIEREAPGMALAMLMGSLNVTPLGMLSRPVCGIRGKTLIINLPGSKKGSQIPDSIISRGVQVLPRDTASLSTTPSESPRAQATSRLSTASCPTPKVQSRCSSKENILRANGMGRVLAQDVYAKDNLPPFPASVKDGYAVRAADGPGDRFIIGESQAGEQPTQTVMPGQVMRVTTGAPIPCGADAVVQVEDTELIRESDDGTEELEVRILVQARPGQDIRPIGHDIKRGECVLAKGTHMGPSEIGLLATVGVTEVEVNKFPVVAVMSTGNELLNPEDDLLPGKIRDSNRSTLLATIQE…	lcl|GPHN_238:8-1483_ORF1_GPHN_238:7:1482	['GPHN_238_ORF1']
GPHN_239	ORF1	465	51.03	GPHN	E40	TTGGAAGGGCTTAAA	TTGGAAGGGCTTAAAGATGAACTCTGGAGGAATAGAGGCTACGACTTAAGAGTCCAGTCCAGGTGCAGCAGCAAGGAGAACATTCTAAGAGCCAGTCACAGTGCTGTAGATATCACCAAGGTGGCTAGAAGACATCGCATGTCTCCTTTTCCCCTGACGTCTATGGACAAAGCCTTCATTACAGTCCTGGAGATGACTCCGGTGCTTGGTACAGAAATCATCAATTACCGAGATGGAATGGGGCGAGTCCTTGCTCAAGATGTATATGCAAAAGACAACCTACCCCCATTCCCTGCATCAGTAAAAGATGGCTATGCTGTTCGAGCTGCTGATGGTCCAGGGGATCGTTTCATCATTGGGGAATCCCAAGCTGGTGAGCAGCCAACTCAGACAGTAATG…	MEGLKDELWRNRGYDLRVQSRCSSKENILRASHSAVDITKVARRHRMSPFPLTSMDKAFITVLEMTPVLGTEIINYRDGMGRVLAQDVYAKDNLPPFPASVKDGYAVRAADGPGDRFIIGESQAGEQPTQTVMPGQVMRVTTGAPIPCGADAVVQVEDTELIRESDDGTEELEVRILVQARPGQDIRPIGHDIKRGECVLAKGTHMGPSEIGLLATVGVTEVEVNKFPVVAVMSTGNELLNPEDDLLPGKIRDSNRSTLLATIQEHGYPTINLGIVGDNPDDLLNALNEGISRADVIITSGGVSMGEKDYLKQVLDIDLHAQIHFGRVFMKPGLPTTFATLDIDGVRKIIFALPGNPVSAVVTCNLFVVPALRKMQGILDPRPTIIKARLSCDVKLDPR…	lcl|GPHN_239:586-1983_ORF1_GPHN_239:585:1982	['GPHN_167_ORF2', 'GPHN_229_ORF1', 'GPHN_239_ORF1']
	ORF2	208	22.97	GPHN	PTC	ATGGCGACCGAGGGA	ATGGCGACCGAGGGAATGATCCTCACCAACCACGACCATCAAATCCGTGTCGGAGTCCTCACAGTGAGTGATAGCTGCTTCAGGAATCTTGCAGAAGACCGCAGTGGGATAAATCTAAAAGATCTTGTCCAAGATCCTTCTTTGTTGGGTGGGACTATATCGGCATACAAGATAGTACCAGATGAAATAGAAGAAATCAAGGAAACACTCATAGACTGGTGTGATGAAAAGGAACTTAATTTAATATTAACAACTGGAGGAACGGGGTTTGCACCACGAGATGTCACTCCAGAGGCCACAAAAGAAGTAATAGAGCGGGAAGCGCCAGGGATGGCCCTGGCAATGCTGATGGGATCGCTCAATGTCACACCTCTGGGCATGCTCTCTAGATTCCAGACT…	MATEGMILTNHDHQIRVGVLTVSDSCFRNLAEDRSGINLKDLVQDPSLLGGTISAYKIVPDEIEEIKETLIDWCDEKELNLILTTGGTGFAPRDVTPEATKEVIEREAPGMALAMLMGSLNVTPLGMLSRFQTPSFLVVFRCSHETQPPLALLLQNRPVLRLHLASLQLLVQHQKLGFRRAHLPIVYLSSTLDWKGLKMNSGGIEATT	lcl|GPHN_239:8-634_ORF2_GPHN_239:7:633	['GPHN_239_ORF2']
GPHN_240	ORF1	101	11.15	GPHN	E40	ATGGCGACCGAGGGA	ATGGCGACCGAGGGAATGATCCTCACCAACCACGACCATCAAATCCGTGTCGGAGTCCTCACAGTGAGTGATAGCTGCTTCAGGAATCTTGCAGAAGACCGCAGTGGGATAAATCTAAAAGATCTTGTCCAAGATCCTTCTTTGTTGGGTGGGACTATATCGGCATACAAGATAGTACCAGATGAAATAGAAGAAATCAAGGAAACACTCATAGACTGGTGTGATGAAAAGGAACTTAATTTAATATTAACAACTGGAGGAACGGGGTTTGCACCACGAGATGTCACTCCAGAGGTAATCAGATGA	MATEGMILTNHDHQIRVGVLTVSDSCFRNLAEDRSGINLKDLVQDPSLLGGTISAYKIVPDEIEEIKETLIDWCDEKELNLILTTGGTGFAPRDVTPEVIR	lcl|GPHN_240:8-313_ORF1_GPHN_240:7:312	['GPHN_240_ORF1']
GPHN_241	ORF1	754	81.71	GPHN	E40	ATGGCGACCGAGGGA	ATGGCGACCGAGGGAATGATCCTCACCAACCACGACCATCAAATCCGTGTCGGAGTCCTCACAGTGAGTGATAGCTGCTTCAGGAATCTTGCAGAAGACCGCAGTGGGATAAATCTAAAAGATCTTGTCCAAGATCCTTCTTTGTTGGGTGGGACTATATCGGCATACAAGATAGTACCAGATGAAATAGAAGAAATCAAGAAATTCCCAACATTCCCATTTTGTGGGCTCCAGAAAGGGGCCACAAAAGAAGTAATAGAGCGGGAAGCGCCAGGGATGGCCCTGGCAATGCTGATGGGATCGCTCAATGTCACACCTCTGGGCATGCTCTCTAGACCAGTGTGTGGAATAAGGGGGAAAACTCTGATAATTAACCTACCTGGTAGCAAGAAAGGATCT…	MATEGMILTNHDHQIRVGVLTVSDSCFRNLAEDRSGINLKDLVQDPSLLGGTISAYKIVPDEIEEIKKFPTFPFCGLQKGATKEVIEREAPGMALAMLMGSLNVTPLGMLSRPVCGIRGKTLIINLPGSKKGSQECFQFILPALPHAIDLLRDAIVKVKEVHDELEDLPSPPPPLSPPPTTSPHKQTEDKGVQCEEEEEEKKDSGVASTEDSSSSHITAAALAAKKHPFYTSPALFMANHGQPIPGLISYSHHATGSADKRIPDSIISRGVQVLPRDTASLSTTPSESPRAQATSRLSTASCPTPKVQSRCSSKENILRASHSAVDITKVARRHRMSPFPLTSMDKAFITVLEMTPVLGTEIINYRDGMGRVLAQDVYAKDNLPPFPASVKDGYAVRAA…	lcl|GPHN_241:8-2272_ORF1_GPHN_241:7:2271	['GPHN_241_ORF1']
	ORF2	100	11.18	unknown	PTC	CTGCAGCAGCTCTTG	CTGCAGCAGCTCTTGCTGCAAAGAAGCATCCATTCTACACCAGTCCTGCTCTTTTCATGGCAAATCATGGGCAGCCCATCCCTGGTCTCATCAGTTATTCCCATCATGCAACAGGCAGTGCAGATAAACGGATTCCAGACTCCATCATTTCTCGTGGTGTTCAGGTGCTCCCACGAGACACAGCCTCCCTTAGCACTACTCCTTCAGAATCGCCCCGTGCTCAGGCTACATCTCGCCTCTCTACAGCTTCTTGTCCAACACCAAAAGTCCAGTCCAGGTGCAGCAGCAAGGAGAACATTCTAA	MQQLLLQRSIHSTPVLLFSWQIMGSPSLVSSVIPIMQQAVQINGFQTPSFLVVFRCSHETQPPLALLLQNRPVLRLHLASLQLLVQHQKSSPGAAARRTF	lcl|GPHN_241:660-962_ORF2_GPHN_241:659:961	['GPHN_105_ORF2', 'GPHN_116_ORF1', 'GPHN_119_ORF1', 'GPHN_143_ORF2', 'GPHN_144_ORF2', 'GPHN_164_ORF1', 'GPHN_171_ORF2', 'GPHN_185_ORF2', 'GPHN_190_ORF2', 'GPHN_241_ORF2', 'GPHN_254_ORF2', 'GPHN_38_ORF2', 'GPHN_4_ORF2', 'GPHN_51_ORF2', 'GPHN_57_ORF2', 'GPHN_77_ORF2', 'GPHN_95_ORF1']
GPHN_242	ORF1	467	50.72	GPHN	E40	TTGGGTGGGACTATA	TTGGGTGGGACTATATCGGCATACAAGATAGTACCAGATGAAATAGAAGAAATCAAGGAAACACTCATAGACTGGTGTGATGAAAAGGAACTTAATTTAATATTAACAACTGGAGGAACGGGGTTTGCACCACGAGATGTCACTCCAGAGGCCACAAAAGAAGTAATAGAGCGGGAAGCGCCAGGGATGGCCCTGGCAATGCTGATGGGATCGCTCAATGTCACACCTCTGGGCATGCTCTCTAGACCAGTGTGTGGAATAAGGGGGAAAACTCTGATAATTAACCTACCTGGTAGCAAGAAAGGATCTCAGGAATGCTTTCAGTTCATACTGCCAGCTCTACCTCATGCCATTGACCTTTTACGTGATGCCATTGTAAAAGTAAAGGAGGTGCATGAT…	MGGTISAYKIVPDEIEEIKETLIDWCDEKELNLILTTGGTGFAPRDVTPEATKEVIEREAPGMALAMLMGSLNVTPLGMLSRPVCGIRGKTLIINLPGSKKGSQECFQFILPALPHAIDLLRDAIVKVKEVHDELEDLPSPPPPLSPPPTTSPHKQTEDKGVQCEEEEEEKKDSGVASTEDSSSSHITAAALAAKIPDSIISRGVQVLPRDTASLSTTPSESPRAQATSRLSTASCPTPKLLNPEDDLLPGKIRDSNRSTLLATIQEHGYPTINLGIVGDNPDDLLNALNEGISRADVIITSGGVSMGEKDYLKQVLDIDLHAQIHFGRVFMKPGLPTTFATLDIDGVRKIIFALPGNPVSAVVTCNLFVVPALRKMQGILDPRPTIIKARLSCDVKLD…	lcl|GPHN_242:73-1476_ORF1_GPHN_242:72:1475	['GPHN_242_ORF1']
GPHN_243	ORF1	643	69.82	GPHN	E40	TTGGGTGGGACTATA	TTGGGTGGGACTATATCGGCATACAAGATAGTACCAGATGAAATAGAAGAAATCAAGGAAACACTCATAGACTGGTGTGATGAAAAGGAACTTAATTTAATATTAACAACTGGAGGAACGGGGTTTGCACCACGAGATGTCACTCCAGAGGCCACAAAAGAAGTAATAGAGCGGGAAGCGCCAGGGATGGCCCTGGCAATGCTGATGGGATCGCTCAATGTCACACCTCTGGGCATGCTCTCTAGACCAGTGTGTGGAATAAGGGGGAAAACTCTGATAATTAACCTACCTGGTAGCAAGAAAGGATCTCAGGAATGCTTTCAGTTCATACTGCCAGCTCTACCTCATGCCATTGACCTTTTACGTGATGCCATTGTAAAAGTAAAGGAGGTGCATGAT…	MGGTISAYKIVPDEIEEIKETLIDWCDEKELNLILTTGGTGFAPRDVTPEATKEVIEREAPGMALAMLMGSLNVTPLGMLSRPVCGIRGKTLIINLPGSKKGSQECFQFILPALPHAIDLLRDAIVKVKEVHDELEDLPSPPPPLSPPPTTSPHKQTEDKGVQCEEEEEEKKDSGVASTEDSSSSHITAAALAAKVQSRCSSKENILRASHSAVDITKVARRHRMSPFPLTSMDKAFITVLEMTPVLGTEIINYRDGMGRVLAQDVYAKDNLPPFPASVKDGYAVRAADGPGDRFIIGESQAGEQPTQTVMPGQVMRVTTGAPIPCGADAVVQVEDTELIRESDDGTEELEVRILVQARPGQDIRPIGHDIKRGECVLAKGTHMGPSEIGLLATVGVTE…	lcl|GPHN_243:73-2004_ORF1_GPHN_243:72:2003	['GPHN_243_ORF1']
GPHN_244	ORF1	439	47.89	GPHN	E40	TTGTCCAACACCAAA	TTGTCCAACACCAAAAGTCACAGTGCTGTAGATATCACCAAGGTGGCTAGAAGACATCGCATGTCTCCTTTTCCCCTGACGTCTATGGACAAAGCCTTCATTACAGTCCTGGAGATGACTCCGGTGCTTGGTACAGAAATCATCAATTACCGAGATGGAATGGGGCGAGTCCTTGCTCAAGATGTATATGCAAAAGACAACCTACCCCCATTCCCTGCATCAGTAAAAGATGGCTATGCTGTTCGAGCTGCTGATGGTCCAGGGGATCGTTTCATCATTGGGGAATCCCAAGCTGGTGAGCAGCCAACTCAGACAGTAATGCCAGGACAAGTGATGCGGGTTACAACAGGTGCTCCAATCCCCTGCGGTGCTGATGCAGTAGTGCAAGTTGAAGATACT…	MSNTKSHSAVDITKVARRHRMSPFPLTSMDKAFITVLEMTPVLGTEIINYRDGMGRVLAQDVYAKDNLPPFPASVKDGYAVRAADGPGDRFIIGESQAGEQPTQTVMPGQVMRVTTGAPIPCGADAVVQVEDTELIRESDDGTEELEVRILVQARPGQDIRPIGHDIKRGECVLAKGTHMGPSEIGLLATVGVTEVEVNKFPVVAVMSTGNELLNPEDDLLPGKIRDSNRSTLLATIQEHGYPTINLGIVGDNPDDLLNALNEGISRADVIITSGGVSMGEKDYLKQVLDIDLHAQIHFGRVFMKPGLPTTFATLDIDGVRKIIFALPGNPVSAVVTCNLFVVPALRKMQGILDPRPTIIKARLSCDVKLDPRPEYHRCILTWHHQEPLPWAQSTGNQM…	lcl|GPHN_244:429-1748_ORF1_GPHN_244:428:1747	['GPHN_100_ORF1', 'GPHN_101_ORF1', 'GPHN_151_ORF1', 'GPHN_17_ORF1', 'GPHN_182_ORF2', 'GPHN_244_ORF1', 'GPHN_67_ORF1']
GPHN_245	ORF1	301	32.25	GPHN	PTC	ATGGCGACCGAGGGA	ATGGCGACCGAGGGAATGATCCTCACCAACCACGACCATCAAATCCGTGTCGGAGTCCTCACAGATGGAATGGGGCGAGTCCTTGCTCAAGATGTATATGCAAAAGACAACCTACCCCCATTCCCTGCATCAGTAAAAGATGGCTATGCTGTTCGAGCTGCTGATGGTCCAGGGGATCGTTTCATCATTGGGGAATCCCAAGCTGGTGAGCAGCCAACTCAGACAGTAATGCCAGGACAAGTGATGCGGGTTACAACAGGTGCTCCAATCCCCTGCGGTGCTGATGCAGTAGTGCAAGTTGAAGATACTGAACTCATCAGGGAATCAGATGATGGTACTGAAGAACTTGAAGTACGAATTCTGGTGCAAGCTCGGCCAGGCCAAGATATCCGACCCATC…	MATEGMILTNHDHQIRVGVLTDGMGRVLAQDVYAKDNLPPFPASVKDGYAVRAADGPGDRFIIGESQAGEQPTQTVMPGQVMRVTTGAPIPCGADAVVQVEDTELIRESDDGTEELEVRILVQARPGQDIRPIGHDIKRGECVLAKGTHMGPSEIGLLATVGVTEVEVNKFPVVAVMSTGNELLNPEDDLLPGKIRDSNRSTLLATIQEHGYPTINLGIVGDNPDDLLNALNEGISRADVIITSGGVSMGEKDYLKQVLDIDLHAQIHFGRVFMKPGLPTTFATLDIDGVRKIIFALPVIV	lcl|GPHN_245:8-913_ORF1_GPHN_245:7:912	['GPHN_245_ORF1']
GPHN_246	ORF1	132	14.82	GPHN	E40	TTGCCAACAACATTT	TTGCCAACAACATTTGCAACTTTGGATATTGATGGTGTAAGAAAAATTATTTTTGCACTACCAGGGAATCCTGTATCAGCTGTGGTCACCTGCAACCTCTTTGTTGTACCTGCACTGAGAAAGATGCAGGGTATCTTGGATCCTCGGCCAACCATCATCAAAGCCAGGTTATCGTGTGATGTAAAACTGGACCCTCGCCCAGAATACCACCGGTGTATACTGACTTGGCATCACCAAGAACCACTGCCCTGGGCCCAGAGTACAGGTAATCAGATGAGCAGCCGTCTGATGAGCATGCGCAGTGCCAATGGATTATTGATGCTACCTCCAAAGACAGAGCAGTACGTGGAACTTCACAAAGGCGAGGTGGTAGATGTCATGGTCATTGGACGGCTATGA	MPTTFATLDIDGVRKIIFALPGNPVSAVVTCNLFVVPALRKMQGILDPRPTIIKARLSCDVKLDPRPEYHRCILTWHHQEPLPWAQSTGNQMSSRLMSMRSANGLLMLPPKTEQYVELHKGEVVDVMVIGRL	lcl|GPHN_246:73-471_ORF1_GPHN_246:72:470	['GPHN_246_ORF1']
GPHN_247	ORF1	227	25.15	GPHN	E40	CTGCTAAATCCTGAA	CTGCTAAATCCTGAAGATGATCTCTTACCAGGAAAGATTCGGGACAGCAATCGATCAACACTTCTAGCAACAATTCAGGAACATGGTTACCCAACAATCAACCTGGGAATTGTAGGAGACAACCCAGATGACTTACTCAATGCCTTGAATGAGGGTATCAGCCGTGCTGATGTCATCATCACGTCAGGAGGTGTGTCCATGGGGGAAAAGGACTATCTCAAGCAGGTGCTGGACATTGATCTTCATGCTCAGATCCATTTTGGCAGAGTTTTTATGAAGCCAGGCTTGCCAACAACATTTGCAACTTTGGATATTGATGGTGTAAGAAAAATTATTTTTGCACTACCAGGGAATCCTGTATCAGCTGTGGTCACCTGCAACCTCTTTGTTGTACCTGCA…	MLNPEDDLLPGKIRDSNRSTLLATIQEHGYPTINLGIVGDNPDDLLNALNEGISRADVIITSGGVSMGEKDYLKQVLDIDLHAQIHFGRVFMKPGLPTTFATLDIDGVRKIIFALPGNPVSAVVTCNLFVVPALRKMQGILDPRPTIIKARLSCDVKLDPRPEYHRCILTWHHQEPLPWAQSTGNQMSSRLMSMRSANGLLMLPPKTEQYVELHKGEVVDVMVIGRL	lcl|GPHN_247:538-1221_ORF1_GPHN_247:537:1220	['GPHN_104_ORF2', 'GPHN_186_ORF1', 'GPHN_195_ORF3', 'GPHN_197_ORF2', 'GPHN_247_ORF1', 'GPHN_255_ORF1', 'GPHN_275_ORF2', 'GPHN_64_ORF1', 'GPHN_88_ORF1']
	ORF2	178	19.33	GPHN	PTC	ATGGCGACCGAGGGA	ATGGCGACCGAGGGAATGATCCTCACCAACCACGACCATCAAATCCGTGTCGGAGTCCTCACAGGTCACAGTGCTGTAGATATCACCAAGGTGGCTAGAAGACATCGCATGTCTCCTTTTCCCCTGACGTCTATGGACAAAGCCTTCATTACAGTCCTGGAGATGACTCCGGTGCTTGGTACAGAAATCATCAATTACCGAGATGGAATGGGGCGAGTCCTTGCTCAAGATGTATATGCAAAAGACAACCTACCCCCATTCCCTGCATCAGTAAAAGATGGCTATGCTGTTCGAGCTGCTGATGGTCCAGGGGATCGTTTCATCATTGGGGAATCCCAAGCTGGTGAGCAGCCAACTCAGACAGTAATGCCAGGACAAGTGATGCGGGTTACAACAGGT…	MATEGMILTNHDHQIRVGVLTGHSAVDITKVARRHRMSPFPLTSMDKAFITVLEMTPVLGTEIINYRDGMGRVLAQDVYAKDNLPPFPASVKDGYAVRAADGPGDRFIIGESQAGEQPTQTVMPGQVMRVTTGAPIPCGADAVVQVEDTELIRESDDGTEELEVRILVQARPGQDIRC	lcl|GPHN_247:8-544_ORF2_GPHN_247:7:543	['GPHN_247_ORF2']
GPHN_248	ORF1	626	67.71	GPHN	E40	ATGGCCCTGGCAATG	ATGGCCCTGGCAATGCTGATGGGATCGCTCAATGTCACACCTCTGGGCATGCTCTCTAGACCAGTGTGTGGAATAAGGGGGAAAACTCTGATAATTAACCTACCTGGTAGCAAGAAAGGATCTCAGGAATGCTTTCAGTTCATACTGCCAGCTCTACCTCATGCCATTGACCTTTTACGTGATGCCATTGTAAAAGTAAAGGAGGTGCATGATGAACTTGAAGATTTACCTTCCCCACCACCTCCTCTCTCTCCACCTCCTACAACTAGCCCACATAAACAGACAGAAGACAAAGGAGTTCAGTGTGAAGAAGAGGAAGAAGAAAAGAAAGACAGTGGTGTAGCTTCAACAGAAGATAGTTCCTCATCACATATAACTGCAGCAGCTCTTGCTGCAAAG…	MALAMLMGSLNVTPLGMLSRPVCGIRGKTLIINLPGSKKGSQECFQFILPALPHAIDLLRDAIVKVKEVHDELEDLPSPPPPLSPPPTTSPHKQTEDKGVQCEEEEEEKKDSGVASTEDSSSSHITAAALAAKIPDSIISRGVQVLPRDTASLSTTPSESPRAQATSRLSTASCPTPKVQSRCSSKENILRASHSAVDITKVARRHRMSPFPLTSMDKAFITVLEMTPVLGTEIINYRDGMGRVLAQDVYAKDNLPPFPASVKDGYAVRAADGPGDRFIIGESQAGEQPTQTVMPGQVMRVTTGAPIPCGADAVVQVEDTELIRESDDGTEELEVRILVQARPGQDIRPIGHDIKRGECVLAKGTHMGPSEIGLLATVGVTEVEVNKFPVVAVMSTGNE…	lcl|GPHN_248:240-2120_ORF1_GPHN_248:239:2119	['GPHN_108_ORF1', 'GPHN_248_ORF1', 'GPHN_33_ORF1', 'GPHN_37_ORF1']
GPHN_249	ORF1	638	69.83	GPHN	E40	CTGCTTCAGGAATCT	CTGCTTCAGGAATCTTGCAGAAGACCGCAGTGGGATAAATCTAAAAGATCTTGTCCAAGATCCTTCTTTGCCACAAAAGAAGTAATAGAGCGGGAAGCGCCAGGGATGGCCCTGGCAATGCTGATGGGATCGCTCAATGTCACACCTCTGGGCATGCTCTCTAGACCAGTGTGTGGAATAAGGGGGAAAACTCTGATAATTAACCTACCTGGTAGCAAGAAAGGATCTCAGATTCCAGACTCCATCATTTCTCGTGGTGTTCAGGTGCTCCCACGAGACACAGCCTCCCTTAGCACTACTCCTTCAGAATCGCCCCGTGCTCAGGCTACATCTCGCCTCTCTACAGCTTCTTGTCCAACACCAAAACAAATTAGACGGCCGGATGAAAGCAAAGGAGTT…	MLQESCRRPQWDKSKRSCPRSFFATKEVIEREAPGMALAMLMGSLNVTPLGMLSRPVCGIRGKTLIINLPGSKKGSQIPDSIISRGVQVLPRDTASLSTTPSESPRAQATSRLSTASCPTPKQIRRPDESKGVASRVGSLKYLLSLGDFVHKTFKARLPSCSSTYSVSELHSRLEGLKDELWRNRGYDLRVQSRCSSKENILRASHSAVDITKVARRHRMSPFPLTSMDKAFITVLEMTPVLGTEIINYRDGMGRVLAQDVYAKDNLPPFPASVKDGYAVRAADGPGDRFIIGESQAGEQPTQTVMPGQVMRVTTGAPIPCGADAVVQVEDTELIRESDDGTEELEVRILVQARPGQDIRPIGHDIKRGECVLAKGTHMGPSEIGLLATVGVTEVEVNK…	lcl|GPHN_249:82-1998_ORF1_GPHN_249:81:1997	['GPHN_249_ORF1']
	ORF2	119	13.86	unknown	PTC	CTGGTAGCAAGAAAG	CTGGTAGCAAGAAAGGATCTCAGATTCCAGACTCCATCATTTCTCGTGGTGTTCAGGTGCTCCCACGAGACACAGCCTCCCTTAGCACTACTCCTTCAGAATCGCCCCGTGCTCAGGCTACATCTCGCCTCTCTACAGCTTCTTGTCCAACACCAAAACAAATTAGACGGCCGGATGAAAGCAAAGGAGTTGCTAGTAGAGTTGGATCCCTCAAATATCTATTATCACTGGGAGATTTTGTACATAAAACATTTAAGGCTCGGCTTCCGTCGTGCTCATCTACCTATAGTGTATCTGAGCTCCACTCTAGATTGGAAGGGCTTAAAGATGAACTCTGGAGGAATAGAGGCTACGACTTAA	MVARKDLRFQTPSFLVVFRCSHETQPPLALLLQNRPVLRLHLASLQLLVQHQNKLDGRMKAKELLVELDPSNIYYHWEILYIKHLRLGFRRAHLPIVYLSSTLDWKGLKMNSGGIEATT	lcl|GPHN_249:290-649_ORF2_GPHN_249:289:648	['GPHN_123_ORF2', 'GPHN_130_ORF2', 'GPHN_200_ORF2', 'GPHN_249_ORF2', 'GPHN_252_ORF2']
GPHN_250	ORF1	660	71.68	GPHN	E40	ATGGCGACCGAGGGA	ATGGCGACCGAGGGAATGATCCTCACCAACCACGACCATCAAATCCGTGTCGGAGTCCTCACAGTGAGTGATAGCTGCTTCAGGAATCTTGCAGAAGACCGCAGTGGGATAAATCTAAAAGATCTTGTCCAAGATCCTTCTTTGTTGGGTGGGACTATATCGGCATACAAGATAGTACCAGATGAAATAGAAGAAATCAAGGCCACAAAAGAAGTAATAGAGCGGGAAGCGCCAGGGATGGCCCTGGCAATGCTGATGGGATCGCTCAATGTCACACCTCTGGGCATGCTCTCTAGACCAGTGTGTGGAATAAGGGGGAAAACTCTGATAATTAACCTACCTGGTAGCAAGAAAGGATCTCAGGAATGCTTTCAGTTCATACTGCCAGCTCTACCTCAT…	MATEGMILTNHDHQIRVGVLTVSDSCFRNLAEDRSGINLKDLVQDPSLLGGTISAYKIVPDEIEEIKATKEVIEREAPGMALAMLMGSLNVTPLGMLSRPVCGIRGKTLIINLPGSKKGSQECFQFILPALPHAIDLLRDAIVKVKEVHDELEDLPSPPPPLSPPPTTSPHKQTEDKGVQCEEEEEEKKDSGVASTEDSSSSHITAAALAAKVQSRCSSKENILRASHSAVDITKVARRHRMSPFPLTSMDKAFITVLEMTPVLGTEIINYRDGMGRVLAQDVYAKDNLPPFPASVKDGYAVRAADGPGDRFIIGESQAGEQPTQTVMPGQVMRVTTGAPIPCGADAVVQVEDTELIRESDDGTEELEVRILVQARPGQDIRPIGHDIKRGECVLAKGT…	lcl|GPHN_250:8-1990_ORF1_GPHN_250:7:1989	['GPHN_250_ORF1']
GPHN_251	ORF1	578	62.35	GPHN	E40	ATGGCGACCGAGGGA	ATGGCGACCGAGGGAATGATCCTCACCAACCACGACCATCAAATCCGTGTCGGAGTCCTCACAGTGAGTGATAGCTGCTTCAGGAATCTTGCAGAAGACCGCAGTGGGATAAATCTAAAAGATCTTGTCCAAGATCCTTCTTTGTTGGGTGGGACTATATCGGCATACAAGATAGTACCAGATGAAATAGAAGAAATCAAGGAAACACTCATAGACTGGTGTGATGAAAAGGAACTTAATTTAATATTAACAACTGGAGGAACGGGGTTTGCACCACGAGATGTCACTCCAGAGGCCACAAAAGAAGTAATAGAGCGGGAAGCGCCAGGGATGGCCCTGGCAATGCTGATGGGATCGCTCAATGTCACACCTCTGGGCATGCTCTCTAGACCAGTGTGT…	MATEGMILTNHDHQIRVGVLTVSDSCFRNLAEDRSGINLKDLVQDPSLLGGTISAYKIVPDEIEEIKETLIDWCDEKELNLILTTGGTGFAPRDVTPEATKEVIEREAPGMALAMLMGSLNVTPLGMLSRPVCGIRGKTLIINLPGSKKGSQIPDSIISRGVQVLPRDTASLSTTPSESPRAQATSRLSTASCPTPKVQSRCSSKENILRASHSAVDITKVARRHRMSPFPLTSMDKAFITVLEMTPVLGTEIINYRDGMGRVLAQDVYAKDNLPPFPASVKDGYAVRAADGPGDRFIIGESQAGEQPTQTVMPGQVMRVTTGAPIPCGADAVVQVEDTELIRESDDGTEELEVRILVQARPGQDIRPIGHDIKRGECVLAKGTHMGPSEIGLLATVGV…	lcl|GPHN_251:8-1744_ORF1_GPHN_251:7:1743	['GPHN_251_ORF1']
GPHN_252	ORF1	640	69.37	GPHN	E40	ATGGCGACCGAGGGA	ATGGCGACCGAGGGAATGATCCTCACCAACCACGACCATCAAATCCGTGTCGGAGTCCTCACAGTGAGTGATAGCTGCTTCAGGAATCTTGCAGAAGACCGCAGTGGGATAAATCTAAAAGATCTTGTCCAAGATCCTTCTTTGTTGGGTGGGACTATATCGGCATACAAGATAGTACCAGATGAAATAGAAGAAATCAAGGAAACACTCATAGACTGGTGTGATGAAAAGGAACTTAATTTAATATTAACAACTGGAGGAACGGGGTTTGCACCACGAGATGTCACTCCAGAGGCCACAAAAGAAGTAATAGAGCGGGAAGCGCCAGGGATGGCCCTGGCAATGCTGATGGGATCGCTCAATGTCACACCTCTGGGCATGCTCTCTAGACCAGTGTGT…	MATEGMILTNHDHQIRVGVLTVSDSCFRNLAEDRSGINLKDLVQDPSLLGGTISAYKIVPDEIEEIKETLIDWCDEKELNLILTTGGTGFAPRDVTPEATKEVIEREAPGMALAMLMGSLNVTPLGMLSRPVCGIRGKTLIINLPGSKKGSQIPDSIISRGVQVLPRDTASLSTTPSESPRAQATSRLSTASCPTPKQIRRPDESKGVASRVGSLKYLLSLGDFVHKTFKARLPSCSSTYSVSELHSRLEGLKDELWRNRGYDLRVQSRCSSKENILRASHSAVDITKVARRHRMSPFPLTSMDKAFITVLEMTPVLGTEIINYRDGMGRVLAQDVYAKDNLPPFPASVKDGYAVRAADGPGDRFIIGESQAGEQPTQTVMPGQVMRVTTGAPIPCGAD…	lcl|GPHN_252:8-1930_ORF1_GPHN_252:7:1929	['GPHN_252_ORF1']
	ORF2	119	13.86	unknown	PTC	CTGGTAGCAAGAAAG	CTGGTAGCAAGAAAGGATCTCAGATTCCAGACTCCATCATTTCTCGTGGTGTTCAGGTGCTCCCACGAGACACAGCCTCCCTTAGCACTACTCCTTCAGAATCGCCCCGTGCTCAGGCTACATCTCGCCTCTCTACAGCTTCTTGTCCAACACCAAAACAAATTAGACGGCCGGATGAAAGCAAAGGAGTTGCTAGTAGAGTTGGATCCCTCAAATATCTATTATCACTGGGAGATTTTGTACATAAAACATTTAAGGCTCGGCTTCCGTCGTGCTCATCTACCTATAGTGTATCTGAGCTCCACTCTAGATTGGAAGGGCTTAAAGATGAACTCTGGAGGAATAGAGGCTACGACTTAA	MVARKDLRFQTPSFLVVFRCSHETQPPLALLLQNRPVLRLHLASLQLLVQHQNKLDGRMKAKELLVELDPSNIYYHWEILYIKHLRLGFRRAHLPIVYLSSTLDWKGLKMNSGGIEATT	lcl|GPHN_252:441-800_ORF2_GPHN_252:440:799	['GPHN_123_ORF2', 'GPHN_130_ORF2', 'GPHN_200_ORF2', 'GPHN_249_ORF2', 'GPHN_252_ORF2']
GPHN_253	ORF1	582	62.36	GPHN	PTC	ATGGCGACCGAGGGA	ATGGCGACCGAGGGAATGATCCTCACCAACCACGACCATCAAATCCGTGTCGGAGTCCTCACAGTGAGTGATAGCTGCTTCAGGAATCTTGCAGAAGACCGCAGTGGGATAAATCTAAAAGATCTTGTCCAAGATCCTTCTTTGTTGGGTGGGACTATATCGGCATACAAGATAGTACCAGATGAAATAGAAGAAATCAAGGAAACACTCATAGACTGGTGTGATGAAAAGGAACTTAATTTAATATTAACAACTGGAGGAACGGGGTTTGCACCACGAGATGTCACTCCAGAGGCCACAAAAGAAGTAATAGAGCGGGAAGCGCCAGGGATGGCCCTGGCAATGCTGATGGGATCGCTCAATGTCACACCTCTGGGCATGCTCTCTAGACCAGTGTGT…	MATEGMILTNHDHQIRVGVLTVSDSCFRNLAEDRSGINLKDLVQDPSLLGGTISAYKIVPDEIEEIKETLIDWCDEKELNLILTTGGTGFAPRDVTPEATKEVIEREAPGMALAMLMGSLNVTPLGMLSRPVCGIRGKTLIINLPGSKKGSQECFQFILPALPHAIDLLRDAIVKVKEVHDELEDLPSPPPPLSPPPTTSPHKQTEDKGVQCEEEEEEKKDSGVASTEDSSSSHITAAALAAKIPDSIISRGVQVLPRDTASLSTTPSESPRAQATSRLSTASCPTPKVQSRCSSKENILRANGMGRVLAQDVYAKDNLPPFPASVKDGYAVRAADGPGDRFIIGESQAGEQPTQTVMPGQVMRVTTGAPIPCGADAVVQVEDTELIRESDDGTEELEV…	lcl|GPHN_253:8-1756_ORF1_GPHN_253:7:1755	['GPHN_253_ORF1']
GPHN_254	ORF1	739	79.92	GPHN	E40	ATGGCGACCGAGGGA	ATGGCGACCGAGGGAATGATCCTCACCAACCACGACCATCAAATCCGTGTCGGAGTCCTCACAGTGAGTGATAGCTGCTTCAGGAATCTTGCAGAAGACCGCAGTGGGATAAATCTAAAAGATCTTGTCCAAGATCCTTCTTTGTTGGGTGGGACTATATCGGCATACAAGATAGTACCAGATGAAATAGAAGAAATCAAGGAAACACTCATAGACTGGTGTGATGAAAAGGAACTTAATTTAATATTAACAACTGGAGGAACGGGGTTTGCACCACGAGATGTCACTCCAGAGAAATTCCCAACATTCCCATTTTGTGGGCTCCAGAAAGGGGCCACAAAAGAAGTAATAGAGCGGGAAGCGCCAGGGATGGCCCTGGCAATGCTGATGGGATCGCTC…	MATEGMILTNHDHQIRVGVLTVSDSCFRNLAEDRSGINLKDLVQDPSLLGGTISAYKIVPDEIEEIKETLIDWCDEKELNLILTTGGTGFAPRDVTPEKFPTFPFCGLQKGATKEVIEREAPGMALAMLMGSLNVTPLGMLSRPVCGIRGKTLIINLPGSKKGSQECFQFILPALPHAIDLLRDAIVKVKEVHDELEDLPSPPPPLSPPPTTSPHKQTEDKGVQCEEEEEEKKDSGVASTEDSSSSHITAAALAAKKHPFYTSPALFMANHGQPIPGLISYSHHATGSADKRIPDSIISRGVQVLPRDTASLSTTPSESPRAQATSRLSTASCPTPKVQSRCSSKENILRANGMGRVLAQDVYAKDNLPPFPASVKDGYAVRAADGPGDRFIIGESQAG…	lcl|GPHN_254:8-2227_ORF1_GPHN_254:7:2226	['GPHN_254_ORF1']
	ORF2	100	11.18	unknown	PTC	CTGCAGCAGCTCTTG	CTGCAGCAGCTCTTGCTGCAAAGAAGCATCCATTCTACACCAGTCCTGCTCTTTTCATGGCAAATCATGGGCAGCCCATCCCTGGTCTCATCAGTTATTCCCATCATGCAACAGGCAGTGCAGATAAACGGATTCCAGACTCCATCATTTCTCGTGGTGTTCAGGTGCTCCCACGAGACACAGCCTCCCTTAGCACTACTCCTTCAGAATCGCCCCGTGCTCAGGCTACATCTCGCCTCTCTACAGCTTCTTGTCCAACACCAAAAGTCCAGTCCAGGTGCAGCAGCAAGGAGAACATTCTAA	MQQLLLQRSIHSTPVLLFSWQIMGSPSLVSSVIPIMQQAVQINGFQTPSFLVVFRCSHETQPPLALLLQNRPVLRLHLASLQLLVQHQKSSPGAAARRTF	lcl|GPHN_254:753-1055_ORF2_GPHN_254:752:1054	['GPHN_105_ORF2', 'GPHN_116_ORF1', 'GPHN_119_ORF1', 'GPHN_143_ORF2', 'GPHN_144_ORF2', 'GPHN_164_ORF1', 'GPHN_171_ORF2', 'GPHN_185_ORF2', 'GPHN_190_ORF2', 'GPHN_241_ORF2', 'GPHN_254_ORF2', 'GPHN_38_ORF2', 'GPHN_4_ORF2', 'GPHN_51_ORF2', 'GPHN_57_ORF2', 'GPHN_77_ORF2', 'GPHN_95_ORF1']
GPHN_255	ORF1	227	25.15	GPHN	E40	CTGCTAAATCCTGAA	CTGCTAAATCCTGAAGATGATCTCTTACCAGGAAAGATTCGGGACAGCAATCGATCAACACTTCTAGCAACAATTCAGGAACATGGTTACCCAACAATCAACCTGGGAATTGTAGGAGACAACCCAGATGACTTACTCAATGCCTTGAATGAGGGTATCAGCCGTGCTGATGTCATCATCACGTCAGGAGGTGTGTCCATGGGGGAAAAGGACTATCTCAAGCAGGTGCTGGACATTGATCTTCATGCTCAGATCCATTTTGGCAGAGTTTTTATGAAGCCAGGCTTGCCAACAACATTTGCAACTTTGGATATTGATGGTGTAAGAAAAATTATTTTTGCACTACCAGGGAATCCTGTATCAGCTGTGGTCACCTGCAACCTCTTTGTTGTACCTGCA…	MLNPEDDLLPGKIRDSNRSTLLATIQEHGYPTINLGIVGDNPDDLLNALNEGISRADVIITSGGVSMGEKDYLKQVLDIDLHAQIHFGRVFMKPGLPTTFATLDIDGVRKIIFALPGNPVSAVVTCNLFVVPALRKMQGILDPRPTIIKARLSCDVKLDPRPEYHRCILTWHHQEPLPWAQSTGNQMSSRLMSMRSANGLLMLPPKTEQYVELHKGEVVDVMVIGRL	lcl|GPHN_255:971-1654_ORF1_GPHN_255:970:1653	['GPHN_104_ORF2', 'GPHN_186_ORF1', 'GPHN_195_ORF3', 'GPHN_197_ORF2', 'GPHN_247_ORF1', 'GPHN_255_ORF1', 'GPHN_275_ORF2', 'GPHN_64_ORF1', 'GPHN_88_ORF1']
	ORF2	258	27.62	GPHN	PTC	ATGGCCCTGGCAATG	ATGGCCCTGGCAATGCTGATGGGATCGCTCAATGTCACACCTCTGGGCATGCTCTCTAGACCAGTGTGTGGAATAAGGGGGAAAACTCTGATAATTAACCTACCTGGTAGCAAGAAAGGATCTCAGATTCCAGACTCCATCATTTCTCGTGGTGTTCAGGTGCTCCCACGAGACACAGCCTCCCTTAGCACTACTCCTTCAGAATCGCCCCGTGCTCAGGCTACATCTCGCCTCTCTACAGCTTCTTGTCCAACACCAAAAGTCCAGTCCAGGTGCAGCAGCAAGGAGAACATTCTAAGAGCCAGTCACAGTGCTGTAGATATCACCAAGGTGGCTAGAAGACATCGCATGTCTCCTTTTCCCCTGACGTCTATGGACAAAGCCTTCATTACAGTCCTG…	MALAMLMGSLNVTPLGMLSRPVCGIRGKTLIINLPGSKKGSQIPDSIISRGVQVLPRDTASLSTTPSESPRAQATSRLSTASCPTPKVQSRCSSKENILRASHSAVDITKVARRHRMSPFPLTSMDKAFITVLEMTPVLGTEIINYRDGMGRVLAQDVYAKDNLPPFPASVKDGYAVRAADGPGDRFIIGESQAGEQPTQTVMPGQVMRVTTGAPIPCGADAVVQVEDTELIRESDDGTEELEVRILVQARPGQDIRC	lcl|GPHN_255:201-977_ORF2_GPHN_255:200:976	['GPHN_186_ORF2', 'GPHN_255_ORF2']
GPHN_256	ORF1	661	71.79	GPHN	E40	ATGGCCCTGGCAATG	ATGGCCCTGGCAATGCTGATGGGATCGCTCAATGTCACACCTCTGGGCATGCTCTCTAGACCAGTGTGTGGAATAAGGGGGAAAACTCTGATAATTAACCTACCTGGTAGCAAGAAAGGATCTCAGGAATGCTTTCAGTTCATACTGCCAGCTCTACCTCATGCCATTGACCTTTTACGTGATGCCATTGTAAAAGTAAAGGAGGTGCATGATGAACTTGAAGATTTACCTTCCCCACCACCTCCTCTCTCTCCACCTCCTACAACTAGCCCACATAAACAGACAGAAGACAAAGGAGTTCAGTGTGAAGAAGAGGAAGAAGAAAAGAAAGACAGTGGTGTAGCTTCAACAGAAGATAGTTCCTCATCACATATAACTGCAGCAGCTCTTGCTGCAAAG…	MALAMLMGSLNVTPLGMLSRPVCGIRGKTLIINLPGSKKGSQECFQFILPALPHAIDLLRDAIVKVKEVHDELEDLPSPPPPLSPPPTTSPHKQTEDKGVQCEEEEEEKKDSGVASTEDSSSSHITAAALAAKIPDSIISRGVQVLPRDTASLSTTPSESPRAQATSRLSTASCPTPKARLPSCSSTYSVSELHSRLEGLKDELWRNRGYDLRVQSRCSSKENILRASHSAVDITKVARRHRMSPFPLTSMDKAFITVLEMTPVLGTEIINYRDGMGRVLAQDVYAKDNLPPFPASVKDGYAVRAADGPGDRFIIGESQAGEQPTQTVMPGQVMRVTTGAPIPCGADAVVQVEDTELIRESDDGTEELEVRILVQARPGQDIRPIGHDIKRGECVLAKG…	lcl|GPHN_256:201-2186_ORF1_GPHN_256:200:2185	['GPHN_256_ORF1']
GPHN_257	ORF1	419	45.61	GPHN	E40	ATGTCTCCTTTTCCC	ATGTCTCCTTTTCCCCTGACGTCTATGGACAAAGCCTTCATTACAGTCCTGGAGATGACTCCGGTGCTTGGTACAGAAATCATCAATTACCGAGATGGAATGGGGCGAGTCCTTGCTCAAGATGTATATGCAAAAGACAACCTACCCCCATTCCCTGCATCAGTAAAAGATGGCTATGCTGTTCGAGCTGCTGATGGTCCAGGGGATCGTTTCATCATTGGGGAATCCCAAGCTGGTGAGCAGCCAACTCAGACAGTAATGCCAGGACAAGTGATGCGGGTTACAACAGGTGCTCCAATCCCCTGCGGTGCTGATGCAGTAGTGCAAGTTGAAGATACTGAACTCATCAGGGAATCAGATGATGGTACTGAAGAACTTGAAGTACGAATTCTGGTGCAA…	MSPFPLTSMDKAFITVLEMTPVLGTEIINYRDGMGRVLAQDVYAKDNLPPFPASVKDGYAVRAADGPGDRFIIGESQAGEQPTQTVMPGQVMRVTTGAPIPCGADAVVQVEDTELIRESDDGTEELEVRILVQARPGQDIRPIGHDIKRGECVLAKGTHMGPSEIGLLATVGVTEVEVNKFPVVAVMSTGNELLNPEDDLLPGKIRDSNRSTLLATIQEHGYPTINLGIVGDNPDDLLNALNEGISRADVIITSGGVSMGEKDYLKQVLDIDLHAQIHFGRVFMKPGLPTTFATLDIDGVRKIIFALPGNPVSAVVTCNLFVVPALRKMQGILDPRPTIIKARLSCDVKLDPRPEYHRCILTWHHQEPLPWAQSTGNQMSSRLMSMRSANGLLMLPPKT…	lcl|GPHN_257:742-2001_ORF1_GPHN_257:741:2000	['GPHN_110_ORF1', 'GPHN_15_ORF1', 'GPHN_173_ORF1', 'GPHN_192_ORF2', 'GPHN_209_ORF3', 'GPHN_227_ORF2', 'GPHN_228_ORF2', 'GPHN_257_ORF1', 'GPHN_264_ORF2', 'GPHN_265_ORF2', 'GPHN_268_ORF2', 'GPHN_30_ORF1', 'GPHN_36_ORF1', 'GPHN_52_ORF1', 'GPHN_80_ORF2']
	ORF2	234	25.2	GPHN	PTC	ATGGCGACCGAGGGA	ATGGCGACCGAGGGAATGATCCTCACCAACCACGACCATCAAATCCGTGTCGGAGTCCTCACAGTGAGTGATAGCTGCTTCAGGAATCTTGCAGAAGACCGCAGTGGGATAAATCTAAAAGATCTTGTCCAAGATCCTTCTTTGTTGGGTGGGACTATATCGGCATACAAGATAGTACCAGATGAAATAGAAGAAATCAAGGAAACACTCATAGACTGGTGTGATGAAAAGGAACTTAATTTAATATTAACAACTGGAGGAACGGGGTTTGCACCACGAGATGTCACTCCAGAGGCCACAAAAGAAGTAATAGAGCGGGAAGCGCCAGGGATGGCCCTGGCAATGCTGATGGGATCGCTCAATGTCACACCTCTGGGCATGCTCTCTAGACCAGTGTGT…	MATEGMILTNHDHQIRVGVLTVSDSCFRNLAEDRSGINLKDLVQDPSLLGGTISAYKIVPDEIEEIKETLIDWCDEKELNLILTTGGTGFAPRDVTPEATKEVIEREAPGMALAMLMGSLNVTPLGMLSRPVCGIRGKTLIINLPGSKKGSQIPDSIISRGVQVLPRDTASLSTTPSESPRAQATSRLSTASCPTPKQIRRPDESKGVASRVGSLKYLLSLGDFVHKTFKVTVL	lcl|GPHN_257:8-712_ORF2_GPHN_257:7:711	['GPHN_257_ORF2']
GPHN_258	ORF1	712	77.7	GPHN	E40	ATGGCGACCGAGGGA	ATGGCGACCGAGGGAATGATCCTCACCAACCACGACCATCAAATCCGTGTCGGAGTCCTCACAGTGAGTGATAGCTGCTTCAGGAATCTTGCAGAAGACCGCAGTGGGATAAATCTAAAAGATCTTGTCCAAGATCCTTCTTTGTTGGGTGGGACTATATCGGCATACAAGATAGTACCAGATGAAATAGAAGAAATCAAGGAAACACTCATAGACTGGTGTGATGAAAAGGAACTTAATTTAATATTAACAACTGGAGGAACGGGGTTTGCACCACGAGATGTCACTCCAGAGGCCACAAAAGAAGTAATAGAGCGGGAAGCGCCAGGGATGGCCCTGGCAATGCTGATGGGATCGCTCAATGTCACACCTCTGGGCATGCTCTCTAGACCAGTGTGT…	MATEGMILTNHDHQIRVGVLTVSDSCFRNLAEDRSGINLKDLVQDPSLLGGTISAYKIVPDEIEEIKETLIDWCDEKELNLILTTGGTGFAPRDVTPEATKEVIEREAPGMALAMLMGSLNVTPLGMLSRPVCGIRGKTLIINLPGSKKGSQECFQFILPALPHAIDLLRDAIVKVKEVHDELEDLPSPPPPLSPPPTTSPHKQTEDKGVQCEEEEEEKKDSGVASTEDSSSSHITAAALAAKLHSRLEGLKDELWRNRGYDLRVQSRCSSKENILRASHSAVDITKVARRHRMSPFPLTSMDKAFITVLEMTPVLGTEIINYRDGMGRVLAQDVYAKDNLPPFPASVKDGYAVRAADGPGDRFIIGESQAGEQPTQTVMPGQVMRVTTGAPIPCGADA…	lcl|GPHN_258:8-2146_ORF1_GPHN_258:7:2145	['GPHN_258_ORF1']
GPHN_259	ORF1	764	82.88	GPHN	E40	ATGGCGACCGAGGGA	ATGGCGACCGAGGGAATGATCCTCACCAACCACGACCATCAAATCCGTGTCGGAGTCCTCACAGTGAGTGATAGCTGCTTCAGGAATCTTGCAGAAGACCGCAGTGGGATAAATCTAAAAGATCTTGTCCAAGATCCTTCTTTGTTGGGTGGGACTATATCGGCATACAAGATAGTACCAGATGAAATAGAAGAAATCAAGGAAACACTCATAGACTGGTGTGATGAAAAGGAACTTAATTTAATATTAACAACTGGAGGAACGGGGTTTGCACCACGAGATGTCACTCCAGAGGCCACAAAAGAAGTAATAGAGCGGGAAGCGCCAGGGATGGCCCTGGCAATGCTGATGGGATCGCTCAATGTCACACCTCTGGGCATGCTCTCTAGACCAGTGTGT…	MATEGMILTNHDHQIRVGVLTVSDSCFRNLAEDRSGINLKDLVQDPSLLGGTISAYKIVPDEIEEIKETLIDWCDEKELNLILTTGGTGFAPRDVTPEATKEVIEREAPGMALAMLMGSLNVTPLGMLSRPVCGIRGKTLIINLPGSKKGSQECFQFILPALPHAIDLLRDAIVKVKEVHDELEDLPSPPPPLSPPPTTSPHKQTEDKGVQCEEEEEEKKDSGVASTEDSSSSHITAAALAAKIPDSIISRGVQVLPRDTASLSTTPSESPRAQATSRLSTASCPTPKYLLSLGDFVHKTFKARLPSCSSTYSVSEVQSRCSSKENILRASHSAVDITKVARRHRMSPFPLTSMDKAFITVLEMTPVLGTEIINYRDGMGRVLAQDVYAKDNLPPFPAS…	lcl|GPHN_259:8-2302_ORF1_GPHN_259:7:2301	['GPHN_259_ORF1']
GPHN_260	ORF1	705	76.56	GPHN	E40	ATGGCGACCGAGGGA	ATGGCGACCGAGGGAATGATCCTCACCAACCACGACCATCAAATCCGTGTCGGAGTCCTCACAGTGAGTGATAGCTGCTTCAGGAATCTTGCAGAAGACCGCAGTGGGATAAATCTAAAAGATCTTGTCCAAGATCCTTCTTTGTTGGGTGGGACTATATCGGCATACAAGATAGTACCAGATGAAATAGAAGAAATCAAGGAAACACTCATAGACTGGTGTGATGAAAAGGAACTTAATTTAATATTAACAACTGGAGGAACGGGGTTTGCACCACGAGATGTCACTCCAGAGGCCACAAAAGAAGTAATAGAGCGGGAAGCGCCAGGGATGGCCCTGGCAATGCTGATGGGATCGCTCAATGTCACACCTCTGGGCATGCTCTCTAGACCAGTGTGT…	MATEGMILTNHDHQIRVGVLTVSDSCFRNLAEDRSGINLKDLVQDPSLLGGTISAYKIVPDEIEEIKETLIDWCDEKELNLILTTGGTGFAPRDVTPEATKEVIEREAPGMALAMLMGSLNVTPLGMLSRPVCGIRGKTLIINLPGSKKGSQECFQFILPALPHAIDLLRDAIVKVKEVHDELEDLPSPPPPLSPPPTTSPHKQTEDKGVQCEEEEEEKKDSGVASTEDSSSSHITAAALAAKARLPSCSSTYSVSEVQSRCSSKENILRASHSAVDITKVARRHRMSPFPLTSMDKAFITVLEMTPVLGTEIINYRDGMGRVLAQDVYAKDNLPPFPASVKDGYAVRAADGPGDRFIIGESQAGEQPTQTVMPGQVMRVTTGAPIPCGADAVVQVEDT…	lcl|GPHN_260:8-2125_ORF1_GPHN_260:7:2124	['GPHN_260_ORF1']
GPHN_261	ORF1	167	18.06	GPHN	PTC	ATGGCGACCGAGGGA	ATGGCGACCGAGGGAATGATCCTCACCAACCACGACCATCAAATCCGTGTCGGAGTCCTCACAGTGAGTGATAGCTGCTTCAGGAATCTTGCAGAAGACCGCAGTGGGATAAATCTAAAAGATCTTGTCCAAGATCCTTCTTTGTTGGGTGGGACTATATCGGCATACAAGATAGTACCAGATGAAATAGAAGAAATCAAGGAAACACTCATAGACTGGTGTGATGAAAAGGAACTTAATTTAATATTAACAACTGGAGGAACGGGGTTTGCACCACGAGATGTCACTCCAGAGAAATTCCCAACATTCCCATTTTGTGGGCTCCAGAAAGGGGCCACAAAAGAAGTAATAGAGCGGGAAGCGCCAGGGATGGCCCTGGCAATGCTGATGGGATCGCTC…	MATEGMILTNHDHQIRVGVLTVSDSCFRNLAEDRSGINLKDLVQDPSLLGGTISAYKIVPDEIEEIKETLIDWCDEKELNLILTTGGTGFAPRDVTPEKFPTFPFCGLQKGATKEVIEREAPGMALAMLMGSLNVTPLGMLSRPVCGIRGKTLIINLPGSKKGSQPT	lcl|GPHN_261:8-511_ORF1_GPHN_261:7:510	['GPHN_135_ORF1', 'GPHN_261_ORF1']
	ORF2	544	59.01	GPHN	E40	CTGGTAGCAAGAAAG	CTGGTAGCAAGAAAGGATCTCAGCCCACATAAACAGACAGAAGACAAAGGAGTTCAGTGTGAAGAAGAGGAAGAAGAAAAGAAAGACAGTGGTGTAGCTTCAACAGAAGATAGTTCCTCATCACATATAACTGCAGCAGCTCTTGCTGCAAAGATTCCAGACTCCATCATTTCTCGTGGTGTTCAGGTGCTCCCACGAGACACAGCCTCCCTTAGCACTACTCCTTCAGAATCGCCCCGTGCTCAGGCTACATCTCGCCTCTCTACAGCTTCTTGTCCAACACCAAAAGTCCAGTCCAGGTGCAGCAGCAAGGAGAACATTCTAAGAGCCAGTCACAGTGCTGTAGATATCACCAAGGTGGCTAGAAGACATCGCATGTCTCCTTTTCCCCTGACGTCT…	MVARKDLSPHKQTEDKGVQCEEEEEEKKDSGVASTEDSSSSHITAAALAAKIPDSIISRGVQVLPRDTASLSTTPSESPRAQATSRLSTASCPTPKVQSRCSSKENILRASHSAVDITKVARRHRMSPFPLTSMDKAFITVLEMTPVLGTEIINYRDGMGRVLAQDVYAKDNLPPFPASVKDGYAVRAADGPGDRFIIGESQAGEQPTQTVMPGQVMRVTTGAPIPCGADAVVQVEDTELIRESDDGTEELEVRILVQARPGQDIRPIGHDIKRGECVLAKGTHMGPSEIGLLATVGVTEVEVNKFPVVAVMSTGNELLNPEDDLLPGKIRDSNRSTLLATIQEHGYPTINLGIVGDNPDDLLNALNEGISRADVIITSGGVSMGEKDYLKQVLDIDLH…	lcl|GPHN_261:480-2114_ORF2_GPHN_261:479:2113	['GPHN_160_ORF1', 'GPHN_166_ORF1', 'GPHN_183_ORF2', 'GPHN_196_ORF2', 'GPHN_261_ORF2', 'GPHN_55_ORF2']
GPHN_262	ORF1	642	69.04	GPHN	PTC	ATGGCGACCGAGGGA	ATGGCGACCGAGGGAATGATCCTCACCAACCACGACCATCAAATCCGTGTCGGAGTCCTCACAGTGAGTGATAGCTGCTTCAGGAATCTTGCAGAAGACCGCAGTGGGATAAATCTAAAAGATCTTGTCCAAGATCCTTCTTTGTTGGGTGGGACTATATCGGCATACAAGATAGTACCAGATGAAATAGAAGAAATCAAGGAAACACTCATAGACTGGTGTGATGAAAAGGAACTTAATTTAATATTAACAACTGGAGGAACGGGGTTTGCACCACGAGATGTCACTCCAGAGGCCACAAAAGAAGTAATAGAGCGGGAAGCGCCAGGGATGGCCCTGGCAATGCTGATGGGATCGCTCAATGTCACACCTCTGGGCATGCTCTCTAGACCAGTGTGT…	MATEGMILTNHDHQIRVGVLTVSDSCFRNLAEDRSGINLKDLVQDPSLLGGTISAYKIVPDEIEEIKETLIDWCDEKELNLILTTGGTGFAPRDVTPEATKEVIEREAPGMALAMLMGSLNVTPLGMLSRPVCGIRGKTLIINLPGSKKGSQECFQFILPALPHAIDLLRDAIVKVKEVHDELEDLPSPPPPLSPPPTTSPHKQTEDKGVQCEEEEEEKKDSGVASTEDSSSSHITAAALAAKIPDSIISRGVQVLPRDTASLSTTPSESPRAQATSRLSTASCPTPKARLPSCSSTYSVSEVQSRCSSKENILRASHSAVDITKVARRHRMSPFPLTSMDKAFITVLEMTPVLGTEIINYRDGMGRVLAQDVYAKDNLPPFPASVKDGYAVRAADGPG…	lcl|GPHN_262:8-1936_ORF1_GPHN_262:7:1935	['GPHN_262_ORF1']
GPHN_263	ORF1	723	78.49	GPHN	E40	ATGGCGACCGAGGGA	ATGGCGACCGAGGGAATGATCCTCACCAACCACGACCATCAAATCCGTGTCGGAGTCCTCACAGTGAGTGATAGCTGCTTCAGGAATCTTGCAGAAGACCGCAGTGGGATAAATCTAAAAGATCTTGTCCAAGATCCTTCTTTGTTGGGTGGGACTATATCGGCATACAAGATAGTACCAGATGAAATAGAAGAAATCAAGGAAACACTCATAGACTGGTGTGATGAAAAGGAACTTAATTTAATATTAACAACTGGAGGAACGGGGTTTGCACCACGAGATGTCACTCCAGAGGCCACAAAAGAAGTAATAGAGCGGGAAGCGCCAGGGATGGCCCTGGCAATGCTGATGGGATCGCTCAATGTCACACCTCTGGGCATGCTCTCTAGACCAGTGTGT…	MATEGMILTNHDHQIRVGVLTVSDSCFRNLAEDRSGINLKDLVQDPSLLGGTISAYKIVPDEIEEIKETLIDWCDEKELNLILTTGGTGFAPRDVTPEATKEVIEREAPGMALAMLMGSLNVTPLGMLSRPVCGIRGKTLIINLPGSKKGSQECFQFILPALPHAIDLLRDAIVKVKEVHDELEDLPSPPPPLSPPPTTSPHKQTEDKGVQCEEEEEEKKDSGVASTEDSSSSHITAAALAAKIPDSIISRGVQVLPRDTASLSTTPSESPRAQATSRLSTASCPTPKQIRRPDESKGVASRVGSLKYLLSLGDFVHKTFKLHSRLEGLKDELWRNRGYDLRVQSRCSSKENILRASHSAVDITKVARRHRMSPFPLTSMDKAFITVLEMTPVLGTEII…	lcl|GPHN_263:8-2179_ORF1_GPHN_263:7:2178	['GPHN_263_ORF1']
	ORF2	105	12.21	unknown	PTC	CTGCAGCAGCTCTTG	CTGCAGCAGCTCTTGCTGCAAAGATTCCAGACTCCATCATTTCTCGTGGTGTTCAGGTGCTCCCACGAGACACAGCCTCCCTTAGCACTACTCCTTCAGAATCGCCCCGTGCTCAGGCTACATCTCGCCTCTCTACAGCTTCTTGTCCAACACCAAAACAAATTAGACGGCCGGATGAAAGCAAAGGAGTTGCTAGTAGAGTTGGATCCCTCAAATATCTATTATCACTGGGAGATTTTGTACATAAAACATTTAAGCTCCACTCTAGATTGGAAGGGCTTAAAGATGAACTCTGGAGGAATAGAGGCTACGACTTAA	MQQLLLQRFQTPSFLVVFRCSHETQPPLALLLQNRPVLRLHLASLQLLVQHQNKLDGRMKAKELLVELDPSNIYYHWEILYIKHLSSTLDWKGLKMNSGGIEATT	lcl|GPHN_263:714-1031_ORF2_GPHN_263:713:1030	['GPHN_103_ORF2', 'GPHN_12_ORF2', 'GPHN_178_ORF2', 'GPHN_180_ORF1', 'GPHN_263_ORF2', 'GPHN_273_ORF2', 'GPHN_48_ORF2']
GPHN_264	ORF1	306	32.92	GPHN	PTC	ATGGCGACCGAGGGA	ATGGCGACCGAGGGAATGATCCTCACCAACCACGACCATCAAATCCGTGTCGGAGTCCTCACAGTGAGTGATAGCTGCTTCAGGAATCTTGCAGAAGACCGCAGTGGGATAAATCTAAAAGATCTTGTCCAAGATCCTTCTTTGTTGGGTGGGACTATATCGGCATACAAGATAGTACCAGATGAAATAGAAGAAATCAAGGAAACACTCATAGACTGGTGTGATGAAAAGGAACTTAATTTAATATTAACAACTGGAGGAACGGGGTTTGCACCACGAGATGTCACTCCAGAGGCCACAAAAGAAGTAATAGAGCGGGAAGCGCCAGGGATGGCCCTGGCAATGCTGATGGGATCGCTCAATGTCACACCTCTGGGCATGCTCTCTAGACCAGTGTGT…	MATEGMILTNHDHQIRVGVLTVSDSCFRNLAEDRSGINLKDLVQDPSLLGGTISAYKIVPDEIEEIKETLIDWCDEKELNLILTTGGTGFAPRDVTPEATKEVIEREAPGMALAMLMGSLNVTPLGMLSRPVCGIRGKTLIINLPGSKKGSQECFQFILPALPHAIDLLRDAIVKVKEVHDELEDLPSPPPPLSPPPTTSPHKQTEDKGVQCEEEEEEKKDSGVASTEDSSSSHITAAALAAKIPDSIISRGVQVLPRDTASLSTTPSESPRAQATSRLSTASCPTPKLNANVTLLQILLHQKSPR	lcl|GPHN_264:8-928_ORF1_GPHN_264:7:927	['GPHN_264_ORF1', 'GPHN_265_ORF1']
	ORF2	419	45.61	GPHN	E40	ATGTCTCCTTTTCCC	ATGTCTCCTTTTCCCCTGACGTCTATGGACAAAGCCTTCATTACAGTCCTGGAGATGACTCCGGTGCTTGGTACAGAAATCATCAATTACCGAGATGGAATGGGGCGAGTCCTTGCTCAAGATGTATATGCAAAAGACAACCTACCCCCATTCCCTGCATCAGTAAAAGATGGCTATGCTGTTCGAGCTGCTGATGGTCCAGGGGATCGTTTCATCATTGGGGAATCCCAAGCTGGTGAGCAGCCAACTCAGACAGTAATGCCAGGACAAGTGATGCGGGTTACAACAGGTGCTCCAATCCCCTGCGGTGCTGATGCAGTAGTGCAAGTTGAAGATACTGAACTCATCAGGGAATCAGATGATGGTACTGAAGAACTTGAAGTACGAATTCTGGTGCAA…	MSPFPLTSMDKAFITVLEMTPVLGTEIINYRDGMGRVLAQDVYAKDNLPPFPASVKDGYAVRAADGPGDRFIIGESQAGEQPTQTVMPGQVMRVTTGAPIPCGADAVVQVEDTELIRESDDGTEELEVRILVQARPGQDIRPIGHDIKRGECVLAKGTHMGPSEIGLLATVGVTEVEVNKFPVVAVMSTGNELLNPEDDLLPGKIRDSNRSTLLATIQEHGYPTINLGIVGDNPDDLLNALNEGISRADVIITSGGVSMGEKDYLKQVLDIDLHAQIHFGRVFMKPGLPTTFATLDIDGVRKIIFALPGNPVSAVVTCNLFVVPALRKMQGILDPRPTIIKARLSCDVKLDPRPEYHRCILTWHHQEPLPWAQSTGNQMSSRLMSMRSANGLLMLPPKT…	lcl|GPHN_264:1022-2281_ORF2_GPHN_264:1021:2280	['GPHN_110_ORF1', 'GPHN_15_ORF1', 'GPHN_173_ORF1', 'GPHN_192_ORF2', 'GPHN_209_ORF3', 'GPHN_227_ORF2', 'GPHN_228_ORF2', 'GPHN_257_ORF1', 'GPHN_264_ORF2', 'GPHN_265_ORF2', 'GPHN_268_ORF2', 'GPHN_30_ORF1', 'GPHN_36_ORF1', 'GPHN_52_ORF1', 'GPHN_80_ORF2']
GPHN_265	ORF1	306	32.92	GPHN	PTC	ATGGCGACCGAGGGA	ATGGCGACCGAGGGAATGATCCTCACCAACCACGACCATCAAATCCGTGTCGGAGTCCTCACAGTGAGTGATAGCTGCTTCAGGAATCTTGCAGAAGACCGCAGTGGGATAAATCTAAAAGATCTTGTCCAAGATCCTTCTTTGTTGGGTGGGACTATATCGGCATACAAGATAGTACCAGATGAAATAGAAGAAATCAAGGAAACACTCATAGACTGGTGTGATGAAAAGGAACTTAATTTAATATTAACAACTGGAGGAACGGGGTTTGCACCACGAGATGTCACTCCAGAGGCCACAAAAGAAGTAATAGAGCGGGAAGCGCCAGGGATGGCCCTGGCAATGCTGATGGGATCGCTCAATGTCACACCTCTGGGCATGCTCTCTAGACCAGTGTGT…	MATEGMILTNHDHQIRVGVLTVSDSCFRNLAEDRSGINLKDLVQDPSLLGGTISAYKIVPDEIEEIKETLIDWCDEKELNLILTTGGTGFAPRDVTPEATKEVIEREAPGMALAMLMGSLNVTPLGMLSRPVCGIRGKTLIINLPGSKKGSQECFQFILPALPHAIDLLRDAIVKVKEVHDELEDLPSPPPPLSPPPTTSPHKQTEDKGVQCEEEEEEKKDSGVASTEDSSSSHITAAALAAKIPDSIISRGVQVLPRDTASLSTTPSESPRAQATSRLSTASCPTPKLNANVTLLQILLHQKSPR	lcl|GPHN_265:8-928_ORF1_GPHN_265:7:927	['GPHN_264_ORF1', 'GPHN_265_ORF1']
	ORF2	419	45.61	GPHN	E40	ATGTCTCCTTTTCCC	ATGTCTCCTTTTCCCCTGACGTCTATGGACAAAGCCTTCATTACAGTCCTGGAGATGACTCCGGTGCTTGGTACAGAAATCATCAATTACCGAGATGGAATGGGGCGAGTCCTTGCTCAAGATGTATATGCAAAAGACAACCTACCCCCATTCCCTGCATCAGTAAAAGATGGCTATGCTGTTCGAGCTGCTGATGGTCCAGGGGATCGTTTCATCATTGGGGAATCCCAAGCTGGTGAGCAGCCAACTCAGACAGTAATGCCAGGACAAGTGATGCGGGTTACAACAGGTGCTCCAATCCCCTGCGGTGCTGATGCAGTAGTGCAAGTTGAAGATACTGAACTCATCAGGGAATCAGATGATGGTACTGAAGAACTTGAAGTACGAATTCTGGTGCAA…	MSPFPLTSMDKAFITVLEMTPVLGTEIINYRDGMGRVLAQDVYAKDNLPPFPASVKDGYAVRAADGPGDRFIIGESQAGEQPTQTVMPGQVMRVTTGAPIPCGADAVVQVEDTELIRESDDGTEELEVRILVQARPGQDIRPIGHDIKRGECVLAKGTHMGPSEIGLLATVGVTEVEVNKFPVVAVMSTGNELLNPEDDLLPGKIRDSNRSTLLATIQEHGYPTINLGIVGDNPDDLLNALNEGISRADVIITSGGVSMGEKDYLKQVLDIDLHAQIHFGRVFMKPGLPTTFATLDIDGVRKIIFALPGNPVSAVVTCNLFVVPALRKMQGILDPRPTIIKARLSCDVKLDPRPEYHRCILTWHHQEPLPWAQSTGNQMSSRLMSMRSANGLLMLPPKT…	lcl|GPHN_265:1064-2323_ORF2_GPHN_265:1063:2322	['GPHN_110_ORF1', 'GPHN_15_ORF1', 'GPHN_173_ORF1', 'GPHN_192_ORF2', 'GPHN_209_ORF3', 'GPHN_227_ORF2', 'GPHN_228_ORF2', 'GPHN_257_ORF1', 'GPHN_264_ORF2', 'GPHN_265_ORF2', 'GPHN_268_ORF2', 'GPHN_30_ORF1', 'GPHN_36_ORF1', 'GPHN_52_ORF1', 'GPHN_80_ORF2']
GPHN_266	ORF1	662	71.66	GPHN	E40	ATGGCGACCGAGGGA	ATGGCGACCGAGGGAATGATCCTCACCAACCACGACCATCAAATCCGTGTCGGAGTCCTCACAGTGAGTGATAGCTGCTTCAGGAATCTTGCAGAAGACCGCAGTGGGATAAATCTAAAAGATCTTGTCCAAGATCCTTCTTTGTTGGGTGGGACTATATCGGCATACAAGATAGTACCAGATGAAATAGAAGAAATCAAGGAAACACTCATAGACTGGTGTGATGAAAAGGAACTTAATTTAATATTAACAACTGGAGGAACGGGGTTTGCACCACGAGATGTCACTCCAGAGGCCACAAAAGAAGTAATAGAGCGGGAAGCGCCAGGGATGGCCCTGGCAATGCTGATGGGATCGCTCAATGTCACACCTCTGGGCATGCTCTCTAGACCAGTGTGT…	MATEGMILTNHDHQIRVGVLTVSDSCFRNLAEDRSGINLKDLVQDPSLLGGTISAYKIVPDEIEEIKETLIDWCDEKELNLILTTGGTGFAPRDVTPEATKEVIEREAPGMALAMLMGSLNVTPLGMLSRPVCGIRGKTLIINLPGSKKGSQECFQFILPALPHAIDLLRDAIVKVKEVHDELEDLPSPPPPLSPPPTTSPHKQTEDKGVQCEEEEEEKKDSGVASTEDSSSSHITAAALAAKKHPFYTSPALFMANHGQPIPGLISYSHHATGSADKRIPDSIISRGVQVLPRDTASLSTTPSESPRAQATSRLSTASCPTPKPTQTVMPGQVMRVTTGAPIPCGADAVVQVEDTELIRESDDGTEELEVRILVQARPGQDIRPIGHDIKRGECVLAK…	lcl|GPHN_266:8-1996_ORF1_GPHN_266:7:1995	['GPHN_266_ORF1']
GPHN_267	ORF1	531	57.01	GPHN	PTC	ATGGCGACCGAGGGA	ATGGCGACCGAGGGAATGATCCTCACCAACCACGACCATCAAATCCGTGTCGGAGTCCTCACAGTGAGTGATAGCTGCTTCAGGAATCTTGCAGAAGACCGCAGTGGGATAAATCTAAAAGATCTTGTCCAAGATCCTTCTTTGTTGGGTGGGACTATATCGGCATACAAGATAGTACCAGATGAAATAGAAGAAATCAAGGAAACACTCATAGACTGGTGTGATGAAAAGGAACTTAATTTAATATTAACAACTGGAGGAACGGGGTTTGCACCACGAGATGTCACTCCAGAGAAATTCCCAACATTCCCATTTTGTGGGCTCCAGAAAGGGGCCACAAAAGAAGTAATAGAGCGGGAAGCGCCAGGGATGGCCCTGGCAATGCTGATGGGATCGCTC…	MATEGMILTNHDHQIRVGVLTVSDSCFRNLAEDRSGINLKDLVQDPSLLGGTISAYKIVPDEIEEIKETLIDWCDEKELNLILTTGGTGFAPRDVTPEKFPTFPFCGLQKGATKEVIEREAPGMALAMLMGSLNVTPLGMLSRPVCGIRGKTLIINLPGSKKGSQECFQFILPALPHAIDLLRDAIVKVKEVHDELEDLPSPPPPLSPPPTTSPHKQTEDKGVQCEEEEEEKKDSGVASTEDSSSSHITAAALAAKIPDSIISRGVQVLPRDTASLSTTPSESPRAQATSRLSTASCPTPKPTQTVMPGQVMRVTTGAPIPCGADAVVQVEDTELIRESDDGTEELEVRILVQARPGQDIRPIGHDIKRGECVLAKGTHMGPSEIGLLATVGVTEVEVN…	lcl|GPHN_267:8-1603_ORF1_GPHN_267:7:1602	['GPHN_267_ORF1']
GPHN_268	ORF1	272	29.21	GPHN	PTC	TTGTTGGGTGGGACT	TTGTTGGGTGGGACTATATCGGCATACAAGATAGTACCAGATGAAATAGAAGAAATCAAGGAAACACTCATAGACTGGTGTGATGAAAAGGAACTTAATTTAATATTAACAACTGGAGGAACGGGGTTTGCACCACGAGATGTCACTCCAGAGAAATTCCCAACATTCCCATTTTGTGGGCTCCAGAAAGGGGCCACAAAAGAAGTAATAGAGCGGGAAGCGCCAGGGATGGCCCTGGCAATGCTGATGGGATCGCTCAATGTCACACCTCTGGGCATGCTCTCTAGACCAGTGTGTGGAATAAGGGGGAAAACTCTGATAATTAACCTACCTGGTAGCAAGAAAGGATCTCAGGAATGCTTTCAGTTCATACTGCCAGCTCTACCTCATGCCATTGAC…	MLGGTISAYKIVPDEIEEIKETLIDWCDEKELNLILTTGGTGFAPRDVTPEKFPTFPFCGLQKGATKEVIEREAPGMALAMLMGSLNVTPLGMLSRPVCGIRGKTLIINLPGSKKGSQECFQFILPALPHAIDLLRDAIVKVKEVHDELEDLPSPPPPLSPPPTTSPHKQTEDKGVQCEEEEEEKKDSGVASTEDSSSSHITAAALAAKIPDSIISRGVQVLPRDTASLSTTPSESPRAQATSRLSTASCPTPKLNANVTLLQILLHQKSPR	lcl|GPHN_268:225-1043_ORF1_GPHN_268:224:1042	['GPHN_268_ORF1']
	ORF2	419	45.61	GPHN	E40	ATGTCTCCTTTTCCC	ATGTCTCCTTTTCCCCTGACGTCTATGGACAAAGCCTTCATTACAGTCCTGGAGATGACTCCGGTGCTTGGTACAGAAATCATCAATTACCGAGATGGAATGGGGCGAGTCCTTGCTCAAGATGTATATGCAAAAGACAACCTACCCCCATTCCCTGCATCAGTAAAAGATGGCTATGCTGTTCGAGCTGCTGATGGTCCAGGGGATCGTTTCATCATTGGGGAATCCCAAGCTGGTGAGCAGCCAACTCAGACAGTAATGCCAGGACAAGTGATGCGGGTTACAACAGGTGCTCCAATCCCCTGCGGTGCTGATGCAGTAGTGCAAGTTGAAGATACTGAACTCATCAGGGAATCAGATGATGGTACTGAAGAACTTGAAGTACGAATTCTGGTGCAA…	MSPFPLTSMDKAFITVLEMTPVLGTEIINYRDGMGRVLAQDVYAKDNLPPFPASVKDGYAVRAADGPGDRFIIGESQAGEQPTQTVMPGQVMRVTTGAPIPCGADAVVQVEDTELIRESDDGTEELEVRILVQARPGQDIRPIGHDIKRGECVLAKGTHMGPSEIGLLATVGVTEVEVNKFPVVAVMSTGNELLNPEDDLLPGKIRDSNRSTLLATIQEHGYPTINLGIVGDNPDDLLNALNEGISRADVIITSGGVSMGEKDYLKQVLDIDLHAQIHFGRVFMKPGLPTTFATLDIDGVRKIIFALPGNPVSAVVTCNLFVVPALRKMQGILDPRPTIIKARLSCDVKLDPRPEYHRCILTWHHQEPLPWAQSTGNQMSSRLMSMRSANGLLMLPPKT…	lcl|GPHN_268:1137-2396_ORF2_GPHN_268:1136:2395	['GPHN_110_ORF1', 'GPHN_15_ORF1', 'GPHN_173_ORF1', 'GPHN_192_ORF2', 'GPHN_209_ORF3', 'GPHN_227_ORF2', 'GPHN_228_ORF2', 'GPHN_257_ORF1', 'GPHN_264_ORF2', 'GPHN_265_ORF2', 'GPHN_268_ORF2', 'GPHN_30_ORF1', 'GPHN_36_ORF1', 'GPHN_52_ORF1', 'GPHN_80_ORF2']
GPHN_269	ORF1	250	27.99	GPHN	E40	CTGCTTCAGGAATCT	CTGCTTCAGGAATCTTGCAGAAGACCGCAGTGGGATAAATCTAAAAGATCTTGTCCAAGATCCTTCTTTCTGCTAAATCCTGAAGATGATCTCTTACCAGGAAAGATTCGGGACAGCAATCGATCAACACTTCTAGCAACAATTCAGGAACATGGTTACCCAACAATCAACCTGGGAATTGTAGGAGACAACCCAGATGACTTACTCAATGCCTTGAATGAGGGTATCAGCCGTGCTGATGTCATCATCACGTCAGGAGGTGTGTCCATGGGGGAAAAGGACTATCTCAAGCAGGTGCTGGACATTGATCTTCATGCTCAGATCCATTTTGGCAGAGTTTTTATGAAGCCAGGCTTGCCAACAACATTTGCAACTTTGGATATTGATGGTGTAAGAAAA…	MLQESCRRPQWDKSKRSCPRSFFLLNPEDDLLPGKIRDSNRSTLLATIQEHGYPTINLGIVGDNPDDLLNALNEGISRADVIITSGGVSMGEKDYLKQVLDIDLHAQIHFGRVFMKPGLPTTFATLDIDGVRKIIFALPGNPVSAVVTCNLFVVPALRKMQGILDPRPTIIKARLSCDVKLDPRPEYHRCILTWHHQEPLPWAQSTGNQMSSRLMSMRSANGLLMLPPKTEQYVELHKGEVVDVMVIGRL	lcl|GPHN_269:82-834_ORF1_GPHN_269:81:833	['GPHN_269_ORF1']
GPHN_270	ORF1	584	63.51	GPHN	E40	CTGCTTCAGGAATCT	CTGCTTCAGGAATCTTGCAGAAGACCGCAGTGGGATAAATCTAAAAGATCTTGTCCAAGATCCTTCTTTGCCACAAAAGAAGTAATAGAGCGGGAAGCGCCAGGGATGGCCCTGGCAATGCTGATGGGATCGCTCAATGTCACACCTCTGGGCATGCTCTCTAGACCAGTGTGTGGAATAAGGGGGAAAACTCTGATAATTAACCTACCTGGTAGCAAGAAAGGATCTCAGATTCCAGACTCCATCATTTCTCGTGGTGTTCAGGTGCTCCCACGAGACACAGCCTCCCTTAGCACTACTCCTTCAGAATCGCCCCGTGCTCAGGCTACATCTCGCCTCTCTACAGCTTCTTGTCCAACACCAAAAGCTCGGCTTCCGTCGTGCTCATCTACCTATAGT…	MLQESCRRPQWDKSKRSCPRSFFATKEVIEREAPGMALAMLMGSLNVTPLGMLSRPVCGIRGKTLIINLPGSKKGSQIPDSIISRGVQVLPRDTASLSTTPSESPRAQATSRLSTASCPTPKARLPSCSSTYSVSEVQSRCSSKENILRASHSAVDITKVARRHRMSPFPLTSMDKAFITVLEMTPVLGTEIINYRDGMGRVLAQDVYAKDNLPPFPASVKDGYAVRAADGPGDRFIIGESQAGEQPTQTVMPGQVMRVTTGAPIPCGADAVVQVEDTELIRESDDGTEELEVRILVQARPGQDIRPIGHDIKRGECVLAKGTHMGPSEIGLLATVGVTEVEVNKFPVVAVMSTGNELLNPEDDLLPGKIRDSNRSTLLATIQEHGYPTINLGIVGDNP…	lcl|GPHN_270:82-1836_ORF1_GPHN_270:81:1835	['GPHN_270_ORF1']
GPHN_271	ORF1	719	77.81	GPHN	E40	ATGGCGACCGAGGGA	ATGGCGACCGAGGGAATGATCCTCACCAACCACGACCATCAAATCCGTGTCGGAGTCCTCACAGTGAGTGATAGCTGCTTCAGGAATCTTGCAGAAGACCGCAGTGGGATAAATCTAAAAGATCTTGTCCAAGATCCTTCTTTGTTGGGTGGGACTATATCGGCATACAAGATAGTACCAGATGAAATAGAAGAAATCAAGGCCACAAAAGAAGTAATAGAGCGGGAAGCGCCAGGGATGGCCCTGGCAATGCTGATGGGATCGCTCAATGTCACACCTCTGGGCATGCTCTCTAGACCAGTGTGTGGAATAAGGGGGAAAACTCTGATAATTAACCTACCTGGTAGCAAGAAAGGATCTCAGGAATGCTTTCAGTTCATACTGCCAGCTCTACCTCAT…	MATEGMILTNHDHQIRVGVLTVSDSCFRNLAEDRSGINLKDLVQDPSLLGGTISAYKIVPDEIEEIKATKEVIEREAPGMALAMLMGSLNVTPLGMLSRPVCGIRGKTLIINLPGSKKGSQECFQFILPALPHAIDLLRDAIVKVKEVHDELEDLPSPPPPLSPPPTTSPHKQTEDKGVQCEEEEEEKKDSGVASTEDSSSSHITAAALAAKIPDSIISRGVQVLPRDTASLSTTPSESPRAQATSRLSTASCPTPKARLPSCSSTYSVSEVQSRCSSKENILRASHSAVDITKVARRHRMSPFPLTSMDKAFITVLEMTPVLGTEIINYRDGMGRVLAQDVYAKDNLPPFPASVKDGYAVRAADGPGDRFIIGESQAGEQPTQTVMPGQVMRVTTGAP…	lcl|GPHN_271:8-2167_ORF1_GPHN_271:7:2166	['GPHN_271_ORF1']
GPHN_272	ORF1	712	77.69	GPHN	E40	ATGGCGACCGAGGGA	ATGGCGACCGAGGGAATGATCCTCACCAACCACGACCATCAAATCCGTGTCGGAGTCCTCACAGTGAGTGATAGCTGCTTCAGGAATCTTGCAGAAGACCGCAGTGGGATAAATCTAAAAGATCTTGTCCAAGATCCTTCTTTGTTGGGTGGGACTATATCGGCATACAAGATAGTACCAGATGAAATAGAAGAAATCAAGGAAACACTCATAGACTGGTGTGATGAAAAGGAACTTAATTTAATATTAACAACTGGAGGAACGGGGTTTGCACCACGAGATGTCACTCCAGAGGCCACAAAAGAAGTAATAGAGCGGGAAGCGCCAGGGATGGCCCTGGCAATGCTGATGGGATCGCTCAATGTCACACCTCTGGGCATGCTCTCTAGACCAGTGTGT…	MATEGMILTNHDHQIRVGVLTVSDSCFRNLAEDRSGINLKDLVQDPSLLGGTISAYKIVPDEIEEIKETLIDWCDEKELNLILTTGGTGFAPRDVTPEATKEVIEREAPGMALAMLMGSLNVTPLGMLSRPVCGIRGKTLIINLPGSKKGSQIPDSIISRGVQVLPRDTASLSTTPSESPRAQATSRLSTASCPTPKQIRRPDESKGVASRVGSLKYLLSLGDFVHKTFKLHSRLEGLKDELWRNRGYDLRVQSRCSSKENILRASLNLKDLAFSRISGHSAVDITKVARRHRMSPFPLTSMDKAFITVLEMTPVLGTEIINYRDGMGRVLAQDVYAKDNLPPFPASVKDGYAVRAADGPGDRFIIGESQAGEQPTQTVMPGQVMRVTTGAPIPCGADA…	lcl|GPHN_272:8-2146_ORF1_GPHN_272:7:2145	['GPHN_272_ORF1']
	ORF2	105	12.17	unknown	PTC	CTGGTAGCAAGAAAG	CTGGTAGCAAGAAAGGATCTCAGATTCCAGACTCCATCATTTCTCGTGGTGTTCAGGTGCTCCCACGAGACACAGCCTCCCTTAGCACTACTCCTTCAGAATCGCCCCGTGCTCAGGCTACATCTCGCCTCTCTACAGCTTCTTGTCCAACACCAAAACAAATTAGACGGCCGGATGAAAGCAAAGGAGTTGCTAGTAGAGTTGGATCCCTCAAATATCTATTATCACTGGGAGATTTTGTACATAAAACATTTAAGCTCCACTCTAGATTGGAAGGGCTTAAAGATGAACTCTGGAGGAATAGAGGCTACGACTTAA	MVARKDLRFQTPSFLVVFRCSHETQPPLALLLQNRPVLRLHLASLQLLVQHQNKLDGRMKAKELLVELDPSNIYYHWEILYIKHLSSTLDWKGLKMNSGGIEATT	lcl|GPHN_272:441-758_ORF2_GPHN_272:440:757	['GPHN_141_ORF2', 'GPHN_165_ORF2', 'GPHN_237_ORF2', 'GPHN_26_ORF2', 'GPHN_272_ORF2']
GPHN_273	ORF1	803	87.5	GPHN	E40	ATGGCGACCGAGGGA	ATGGCGACCGAGGGAATGATCCTCACCAACCACGACCATCAAATCCGTGTCGGAGTCCTCACAGTGAGTGATAGCTGCTTCAGGAATCTTGCAGAAGACCGCAGTGGGATAAATCTAAAAGATCTTGTCCAAGATCCTTCTTTGTTGGGTGGGACTATATCGGCATACAAGATAGTACCAGATGAAATAGAAGAAATCAAGGAAACACTCATAGACTGGTGTGATGAAAAGGAACTTAATTTAATATTAACAACTGGAGGAACGGGGTTTGCACCACGAGATGTCACTCCAGAGGCCACAAAAGAAGTAATAGAGCGGGAAGCGCCAGGGATGGCCCTGGCAATGCTGATGGGATCGCTCAATGTCACACCTCTGGGCATGCTCTCTAGACCAGTGTGT…	MATEGMILTNHDHQIRVGVLTVSDSCFRNLAEDRSGINLKDLVQDPSLLGGTISAYKIVPDEIEEIKETLIDWCDEKELNLILTTGGTGFAPRDVTPEATKEVIEREAPGMALAMLMGSLNVTPLGMLSRPVCGIRGKTLIINLPGSKKGSQECFQFILPALPHAIDLLRDAIVKVKEVHDELEDLPSPPPPLSPPPTTSPHKQTEDKGVQCEEEEEEKKDSGVASTEDSSSSHITAAALAAKIPDSIISRGVQVLPRDTASLSTTPSESPRAQATSRLSTASCPTPKQIRRPDESKGVASRVGSLKYLLSLGDFVHKTFKLHSRLEGLKDELWRNRGYDLRVQSRCSSKENILRASLNLKDLAFSRISGHSAVDITKVARRHRMSPFPLTSMDKAFIT…	lcl|GPHN_273:8-2419_ORF1_GPHN_273:7:2418	['GPHN_273_ORF1']
	ORF2	105	12.21	unknown	PTC	CTGCAGCAGCTCTTG	CTGCAGCAGCTCTTGCTGCAAAGATTCCAGACTCCATCATTTCTCGTGGTGTTCAGGTGCTCCCACGAGACACAGCCTCCCTTAGCACTACTCCTTCAGAATCGCCCCGTGCTCAGGCTACATCTCGCCTCTCTACAGCTTCTTGTCCAACACCAAAACAAATTAGACGGCCGGATGAAAGCAAAGGAGTTGCTAGTAGAGTTGGATCCCTCAAATATCTATTATCACTGGGAGATTTTGTACATAAAACATTTAAGCTCCACTCTAGATTGGAAGGGCTTAAAGATGAACTCTGGAGGAATAGAGGCTACGACTTAA	MQQLLLQRFQTPSFLVVFRCSHETQPPLALLLQNRPVLRLHLASLQLLVQHQNKLDGRMKAKELLVELDPSNIYYHWEILYIKHLSSTLDWKGLKMNSGGIEATT	lcl|GPHN_273:714-1031_ORF2_GPHN_273:713:1030	['GPHN_103_ORF2', 'GPHN_12_ORF2', 'GPHN_178_ORF2', 'GPHN_180_ORF1', 'GPHN_263_ORF2', 'GPHN_273_ORF2', 'GPHN_48_ORF2']
GPHN_274	ORF1	716	77.35	GPHN	E40	ATGGCGACCGAGGGA	ATGGCGACCGAGGGAATGATCCTCACCAACCACGACCATCAAATCCGTGTCGGAGTCCTCACAGTGAGTGATAGCTGCTTCAGGAATCTTGCAGAAGACCGCAGTGGGATAAATCTAAAAGATCTTGTCCAAGATCCTTCTTTGTTGGGTGGGACTATATCGGCATACAAGATAGTACCAGATGAAATAGAAGAAATCAAGGAAACACTCATAGACTGGTGTGATGAAAAGGAACTTAATTTAATATTAACAACTGGAGGAACGGGGTTTGCACCACGAGATGTCACTCCAGAGGCCACAAAAGAAGTAATAGAGCGGGAAGCGCCAGGGATGGCCCTGGCAATGCTGATGGGATCGCTCAATGTCACACCTCTGGGCATGCTCTCTAGACCAGTGTGT…	MATEGMILTNHDHQIRVGVLTVSDSCFRNLAEDRSGINLKDLVQDPSLLGGTISAYKIVPDEIEEIKETLIDWCDEKELNLILTTGGTGFAPRDVTPEATKEVIEREAPGMALAMLMGSLNVTPLGMLSRPVCGIRGKTLIINLPGSKKGSQECFQFILPALPHAIDLLRDAIVKVKEVHDELEDLPSPPPPLSPPPTTSPHKQTEDKGVQCEEEEEEKKDSGVASTEDSSSSHITAAALAAKIPDSIISRGVQVLPRDTASLSTTPSESPRAQATSRLSTASCPTPKQIRRPDESKGVASRVGSLKYLLSLGDFVHKTFKARLPSCSSTYSVSEVQSRCSSKENILRASHSAVDITKVARRHRMSPFPLTSMDKAFITVLEMTPVLGTEIINYRDGMG…	lcl|GPHN_274:8-2158_ORF1_GPHN_274:7:2157	['GPHN_274_ORF1']
	ORF2	111	13.08	unknown	PTC	CTGCAGCAGCTCTTG	CTGCAGCAGCTCTTGCTGCAAAGATTCCAGACTCCATCATTTCTCGTGGTGTTCAGGTGCTCCCACGAGACACAGCCTCCCTTAGCACTACTCCTTCAGAATCGCCCCGTGCTCAGGCTACATCTCGCCTCTCTACAGCTTCTTGTCCAACACCAAAACAAATTAGACGGCCGGATGAAAGCAAAGGAGTTGCTAGTAGAGTTGGATCCCTCAAATATCTATTATCACTGGGAGATTTTGTACATAAAACATTTAAGGCTCGGCTTCCGTCGTGCTCATCTACCTATAGTGTATCTGAGGTCCAGTCCAGGTGCAGCAGCAAGGAGAACATTCTAA	MQQLLLQRFQTPSFLVVFRCSHETQPPLALLLQNRPVLRLHLASLQLLVQHQNKLDGRMKAKELLVELDPSNIYYHWEILYIKHLRLGFRRAHLPIVYLRSSPGAAARRTF	lcl|GPHN_274:714-1049_ORF2_GPHN_274:713:1048	['GPHN_117_ORF2', 'GPHN_138_ORF2', 'GPHN_169_ORF1', 'GPHN_23_ORF2', 'GPHN_274_ORF2', 'GPHN_277_ORF2', 'GPHN_81_ORF2']
GPHN_275	ORF1	123	13.57	GPHN	PTC	ATGGCGACCGAGGGA	ATGGCGACCGAGGGAATGATCCTCACCAACCACGACCATCAAATCCGTGTCGGAGTCCTCACAGTGAGTGATAGCTGCTTCAGGAATCTTGCAGAAGACCGCAGTGGGATAAATCTAAAAGATCTTGTCCAAGATCCTTCTTTGTTGGGTGGGACTATATCGGCATACAAGATAGTACCAGATGAAATAGAAGAAATCAAGGAAACACTCATAGACTGGTGTGATGAAAAGGAACTTAATTTAATATTAACAACTGGAGGAACGGGGTTTGCACCACGAGATGTCACTCCAGAGAAATTCCCAACATTCCCATTTTGTGGGCTCCAGAAAGGGACCAGTGTGTGGAATAAGGGGGAAAACTCTGATAATTAA	MATEGMILTNHDHQIRVGVLTVSDSCFRNLAEDRSGINLKDLVQDPSLLGGTISAYKIVPDEIEEIKETLIDWCDEKELNLILTTGGTGFAPRDVTPEKFPTFPFCGLQKGTSVWNKGENSDN	lcl|GPHN_275:8-379_ORF1_GPHN_275:7:378	['GPHN_214_ORF1', 'GPHN_275_ORF1', 'GPHN_85_ORF1', 'GPHN_90_ORF1']
	ORF2	227	25.15	GPHN	E40	CTGCTAAATCCTGAA	CTGCTAAATCCTGAAGATGATCTCTTACCAGGAAAGATTCGGGACAGCAATCGATCAACACTTCTAGCAACAATTCAGGAACATGGTTACCCAACAATCAACCTGGGAATTGTAGGAGACAACCCAGATGACTTACTCAATGCCTTGAATGAGGGTATCAGCCGTGCTGATGTCATCATCACGTCAGGAGGTGTGTCCATGGGGGAAAAGGACTATCTCAAGCAGGTGCTGGACATTGATCTTCATGCTCAGATCCATTTTGGCAGAGTTTTTATGAAGCCAGGCTTGCCAACAACATTTGCAACTTTGGATATTGATGGTGTAAGAAAAATTATTTTTGCACTACCAGGGAATCCTGTATCAGCTGTGGTCACCTGCAACCTCTTTGTTGTACCTGCA…	MLNPEDDLLPGKIRDSNRSTLLATIQEHGYPTINLGIVGDNPDDLLNALNEGISRADVIITSGGVSMGEKDYLKQVLDIDLHAQIHFGRVFMKPGLPTTFATLDIDGVRKIIFALPGNPVSAVVTCNLFVVPALRKMQGILDPRPTIIKARLSCDVKLDPRPEYHRCILTWHHQEPLPWAQSTGNQMSSRLMSMRSANGLLMLPPKTEQYVELHKGEVVDVMVIGRL	lcl|GPHN_275:1052-1735_ORF2_GPHN_275:1051:1734	['GPHN_104_ORF2', 'GPHN_186_ORF1', 'GPHN_195_ORF3', 'GPHN_197_ORF2', 'GPHN_247_ORF1', 'GPHN_255_ORF1', 'GPHN_275_ORF2', 'GPHN_64_ORF1', 'GPHN_88_ORF1']
	ORF3	265	28.69	GPHN	PTC	CTGGAGGAACGGGGT	CTGGAGGAACGGGGTTTGCACCACGAGATGTCACTCCAGAGAAATTCCCAACATTCCCATTTTGTGGGCTCCAGAAAGGGACCAGTGTGTGGAATAAGGGGGAAAACTCTGATAATTAACCTACCTGGTAGCAAGAAAGGATCTCAGATTCCAGACTCCATCATTTCTCGTGGTGTTCAGGTGCTCCCACGAGACACAGCCTCCCTTAGCACTACTCCTTCAGAATCGCCCCGTGCTCAGGCTACATCTCGCCTCTCTACAGCTTCTTGTCCAACACCAAAAGTCCAGTCCAGGTGCAGCAGCAAGGAGAACATTCTAAGAGCCAGTCACAGTGCTGTAGATATCACCAAGGTGGCTAGAAGACATCGCATGTCTCCTTTTCCCCTGACGTCTATGGAC…	MEERGLHHEMSLQRNSQHSHFVGSRKGPVCGIRGKTLIINLPGSKKGSQIPDSIISRGVQVLPRDTASLSTTPSESPRAQATSRLSTASCPTPKVQSRCSSKENILRASHSAVDITKVARRHRMSPFPLTSMDKAFITVLEMTPVLGTEIINYRDGMGRVLAQDVYAKDNLPPFPASVKDGYAVRAADGPGDRFIIGESQAGEQPTQTVMPGQVMRVTTGAPIPCGADAVVQVEDTELIRESDDGTEELEVRILVQARPGQDIRC	lcl|GPHN_275:261-1058_ORF3_GPHN_275:260:1057	['GPHN_275_ORF3']
GPHN_276	ORF1	762	82.63	GPHN	E40	ATGGCGACCGAGGGA	ATGGCGACCGAGGGAATGATCCTCACCAACCACGACCATCAAATCCGTGTCGGAGTCCTCACAGTGAGTGATAGCTGCTTCAGGAATCTTGCAGAAGACCGCAGTGGGATAAATCTAAAAGATCTTGTCCAAGATCCTTCTTTGTTGGGTGGGACTATATCGGCATACAAGATAGTACCAGATGAAATAGAAGAAATCAAGGAAACACTCATAGACTGGTGTGATGAAAAGGAACTTAATTTAATATTAACAACTGGAGGAACGGGGTTTGCACCACGAGATGTCACTCCAGAGAAATTCCCAACATTCCCATTTTGTGGGCTCCAGAAAGGGGCCACAAAAGAAGTAATAGAGCGGGAAGCGCCAGGGATGGCCCTGGCAATGCTGATGGGATCGCTC…	MATEGMILTNHDHQIRVGVLTVSDSCFRNLAEDRSGINLKDLVQDPSLLGGTISAYKIVPDEIEEIKETLIDWCDEKELNLILTTGGTGFAPRDVTPEKFPTFPFCGLQKGATKEVIEREAPGMALAMLMGSLNVTPLGMLSRPVCGIRGKTLIINLPGSKKGSQECFQFILPALPHAIDLLRDAIVKVKEVHDELEDLPSPPPPLSPPPTTSPHKQTEDKGVQCEEEEEEKKDSGVASTEDSSSSHITAAALAAKIPDSIISRGVQVLPRDTASLSTTPSESPRAQATSRLSTASCPTPKVQSRCSSKENILRASLNLKDLAFSRISGHSAVDITKVARRHRMSPFPLTSMDKAFITVLEMTPVLGTEIINYRDGMGRVLAQDVYAKDNLPPFPASVK…	lcl|GPHN_276:8-2296_ORF1_GPHN_276:7:2295	['GPHN_276_ORF1']
GPHN_277	ORF1	685	74.65	GPHN	E40	ATGGCGACCGAGGGA	ATGGCGACCGAGGGAATGATCCTCACCAACCACGACCATCAAATCCGTGTCGGAGTCCTCACAGTGAGTGATAGCTGCTTCAGGAATCTTGCAGAAGACCGCAGTGGGATAAATCTAAAAGATCTTGTCCAAGATCCTTCTTTGTTGGGTGGGACTATATCGGCATACAAGATAGTACCAGATGAAATAGAAGAAATCAAGGAAACACTCATAGACTGGTGTGATGAAAAGGAACTTAATTTAATATTAACAACTGGAGGAACGGGGTTTGCACCACGAGATGTCACTCCAGAGAAATTCCCAACATTCCCATTTTGTGGGCTCCAGAAAGGGGCCACAAAAGAAGTAATAGAGCGGGAAGCGCCAGGGATGGCCCTGGCAATGCTGATGGGATCGCTC…	MATEGMILTNHDHQIRVGVLTVSDSCFRNLAEDRSGINLKDLVQDPSLLGGTISAYKIVPDEIEEIKETLIDWCDEKELNLILTTGGTGFAPRDVTPEKFPTFPFCGLQKGATKEVIEREAPGMALAMLMGSLNVTPLGMLSRPVCGIRGKTLIINLPGSKKGSQECFQFILPALPHAIDLLRDAIVKVKEVHDELEDLPSPPPPLSPPPTTSPHKQTEDKGVQCEEEEEEKKDSGVASTEDSSSSHITAAALAAKIPDSIISRGVQVLPRDTASLSTTPSESPRAQATSRLSTASCPTPKQIRRPDESKGVASRVGSLKYLLSLGDFVHKTFKARLPSCSSTYSVSEVQSRCSSKENILRASHSAVDITKVARRHRMSPFPLTSMDKAFITVLEMTPV…	lcl|GPHN_277:8-2065_ORF1_GPHN_277:7:2064	['GPHN_277_ORF1']
	ORF2	111	13.08	unknown	PTC	CTGCAGCAGCTCTTG	CTGCAGCAGCTCTTGCTGCAAAGATTCCAGACTCCATCATTTCTCGTGGTGTTCAGGTGCTCCCACGAGACACAGCCTCCCTTAGCACTACTCCTTCAGAATCGCCCCGTGCTCAGGCTACATCTCGCCTCTCTACAGCTTCTTGTCCAACACCAAAACAAATTAGACGGCCGGATGAAAGCAAAGGAGTTGCTAGTAGAGTTGGATCCCTCAAATATCTATTATCACTGGGAGATTTTGTACATAAAACATTTAAGGCTCGGCTTCCGTCGTGCTCATCTACCTATAGTGTATCTGAGGTCCAGTCCAGGTGCAGCAGCAAGGAGAACATTCTAA	MQQLLLQRFQTPSFLVVFRCSHETQPPLALLLQNRPVLRLHLASLQLLVQHQNKLDGRMKAKELLVELDPSNIYYHWEILYIKHLRLGFRRAHLPIVYLRSSPGAAARRTF	lcl|GPHN_277:753-1088_ORF2_GPHN_277:752:1087	['GPHN_117_ORF2', 'GPHN_138_ORF2', 'GPHN_169_ORF1', 'GPHN_23_ORF2', 'GPHN_274_ORF2', 'GPHN_277_ORF2', 'GPHN_81_ORF2']

## Sheet: ORF retained with TIS ribo-seq
		AA_length	mol_weight	Id matching	E40 splicing	TIS	CDS	AAseq	info	DUP
GPHN_1	ORF1	736	79.76	GPHN	E40	ATGGCGACCGAGGGA	ATGGCGACCGAGGGAATGATCCTCACCAACCACGACCATCAAATCCGTGTCGGAGTCCTCACAGTGAGTGATAGCTGCTTCAGGAATCTTGCAGAAGACCGCAGTGGGATAAATCTAAAAGATCTTGTCCAAGATCCTTCTTTGTTGGGTGGGACTATATCGGCATACAAGATAGTACCAGATGAAATAGAAGAAATCAAGGAAACACTCATAGACTGGTGTGATGAAAAGGAACTTAATTTAATATTAACAACTGGAGGAACGGGGTTTGCACCACGAGATGTCACTCCAGAGGCCACAAAAGAAGTAATAGAGCGGGAAGCGCCAGGGATGGCCCTGGCAATGCTGATGGGATCGCTCAATGTCACACCTCTGGGCATGCTCTCTAGACCAGTGTGT…	MATEGMILTNHDHQIRVGVLTVSDSCFRNLAEDRSGINLKDLVQDPSLLGGTISAYKIVPDEIEEIKETLIDWCDEKELNLILTTGGTGFAPRDVTPEATKEVIEREAPGMALAMLMGSLNVTPLGMLSRPVCGIRGKTLIINLPGSKKGSQECFQFILPALPHAIDLLRDAIVKVKEVHDELEDLPSPPPPLSPPPTTSPHKQTEDKGVQCEEEEEEKKDSGVASTEDSSSSHITAAALAAKIPDSIISRGVQVLPRDTASLSTTPSESPRAQATSRLSTASCPTPKVQSRCSSKENILRASHSAVDITKVARRHRMSPFPLTSMDKAFITVLEMTPVLGTEIINYRDGMGRVLAQDVYAKDNLPPFPASVKDGYAVRAADGPGDRFIIGESQAGEQP…	lcl|GPHN_1:8-2218_ORF1_GPHN_1:7:2217	['GPHN_1_ORF1']
GPHN_2	ORF1	645	69.95	GPHN	E40	ATGGCGACCGAGGGA	ATGGCGACCGAGGGAATGATCCTCACCAACCACGACCATCAAATCCGTGTCGGAGTCCTCACAGTGAGTGATAGCTGCTTCAGGAATCTTGCAGAAGACCGCAGTGGGATAAATCTAAAAGATCTTGTCCAAGATCCTTCTTTGTTGGGTGGGACTATATCGGCATACAAGATAGTACCAGATGAAATAGAAGAAATCAAGGAAACACTCATAGACTGGTGTGATGAAAAGGAACTTAATTTAATATTAACAACTGGAGGAACGGGGTTTGCACCACGAGATGTCACTCCAGAGGCCACAAAAGAAGTAATAGAGCGGGAAGCGCCAGGGATGGCCCTGGCAATGCTGATGGGATCGCTCAATGTCACACCTCTGGGCATGCTCTCTAGACCAGTGTGT…	MATEGMILTNHDHQIRVGVLTVSDSCFRNLAEDRSGINLKDLVQDPSLLGGTISAYKIVPDEIEEIKETLIDWCDEKELNLILTTGGTGFAPRDVTPEATKEVIEREAPGMALAMLMGSLNVTPLGMLSRPVCGIRGKTLIINLPGSKKGSQIPDSIISRGVQVLPRDTASLSTTPSESPRAQATSRLSTASCPTPKVQSRCSSKENILRASHSAVDITKVARRHRMSPFPLTSMDKAFITVLEMTPVLGTEIINYRDGMGRVLAQDVYAKDNLPPFPASVKDGYAVRAADGPGDRFIIGESQAGEQPTQTVMPGQVMRVTTGAPIPCGADAVVQVEDTELIRESDDGTEELEVRILVQARPGQDIRPIGHDIKRGECVLAKGTHMGPSEIGLLATVGV…	lcl|GPHN_2:8-1945_ORF1_GPHN_2:7:1944	['GPHN_2_ORF1']
GPHN_3	ORF1	749	81.21	GPHN	E40	ATGGCGACCGAGGGA	ATGGCGACCGAGGGAATGATCCTCACCAACCACGACCATCAAATCCGTGTCGGAGTCCTCACAGTGAGTGATAGCTGCTTCAGGAATCTTGCAGAAGACCGCAGTGGGATAAATCTAAAAGATCTTGTCCAAGATCCTTCTTTGTTGGGTGGGACTATATCGGCATACAAGATAGTACCAGATGAAATAGAAGAAATCAAGGAAACACTCATAGACTGGTGTGATGAAAAGGAACTTAATTTAATATTAACAACTGGAGGAACGGGGTTTGCACCACGAGATGTCACTCCAGAGAAATTCCCAACATTCCCATTTTGTGGGCTCCAGAAAGGGGCCACAAAAGAAGTAATAGAGCGGGAAGCGCCAGGGATGGCCCTGGCAATGCTGATGGGATCGCTC…	MATEGMILTNHDHQIRVGVLTVSDSCFRNLAEDRSGINLKDLVQDPSLLGGTISAYKIVPDEIEEIKETLIDWCDEKELNLILTTGGTGFAPRDVTPEKFPTFPFCGLQKGATKEVIEREAPGMALAMLMGSLNVTPLGMLSRPVCGIRGKTLIINLPGSKKGSQECFQFILPALPHAIDLLRDAIVKVKEVHDELEDLPSPPPPLSPPPTTSPHKQTEDKGVQCEEEEEEKKDSGVASTEDSSSSHITAAALAAKIPDSIISRGVQVLPRDTASLSTTPSESPRAQATSRLSTASCPTPKVQSRCSSKENILRASHSAVDITKVARRHRMSPFPLTSMDKAFITVLEMTPVLGTEIINYRDGMGRVLAQDVYAKDNLPPFPASVKDGYAVRAADGPGD…	lcl|GPHN_3:8-2257_ORF1_GPHN_3:7:2256	['GPHN_3_ORF1']
GPHN_4	ORF1	772	83.68	GPHN	E40	ATGGCGACCGAGGGA	ATGGCGACCGAGGGAATGATCCTCACCAACCACGACCATCAAATCCGTGTCGGAGTCCTCACAGTGAGTGATAGCTGCTTCAGGAATCTTGCAGAAGACCGCAGTGGGATAAATCTAAAAGATCTTGTCCAAGATCCTTCTTTGTTGGGTGGGACTATATCGGCATACAAGATAGTACCAGATGAAATAGAAGAAATCAAGGAAACACTCATAGACTGGTGTGATGAAAAGGAACTTAATTTAATATTAACAACTGGAGGAACGGGGTTTGCACCACGAGATGTCACTCCAGAGGCCACAAAAGAAGTAATAGAGCGGGAAGCGCCAGGGATGGCCCTGGCAATGCTGATGGGATCGCTCAATGTCACACCTCTGGGCATGCTCTCTAGACCAGTGTGT…	MATEGMILTNHDHQIRVGVLTVSDSCFRNLAEDRSGINLKDLVQDPSLLGGTISAYKIVPDEIEEIKETLIDWCDEKELNLILTTGGTGFAPRDVTPEATKEVIEREAPGMALAMLMGSLNVTPLGMLSRPVCGIRGKTLIINLPGSKKGSQECFQFILPALPHAIDLLRDAIVKVKEVHDELEDLPSPPPPLSPPPTTSPHKQTEDKGVQCEEEEEEKKDSGVASTEDSSSSHITAAALAAKKHPFYTSPALFMANHGQPIPGLISYSHHATGSADKRIPDSIISRGVQVLPRDTASLSTTPSESPRAQATSRLSTASCPTPKVQSRCSSKENILRASHSAVDITKVARRHRMSPFPLTSMDKAFITVLEMTPVLGTEIINYRDGMGRVLAQDVYAKD…	lcl|GPHN_4:8-2326_ORF1_GPHN_4:7:2325	['GPHN_4_ORF1']
	ORF2	100	11.18	unknown	PTC	CTGCAGCAGCTCTTG	CTGCAGCAGCTCTTGCTGCAAAGAAGCATCCATTCTACACCAGTCCTGCTCTTTTCATGGCAAATCATGGGCAGCCCATCCCTGGTCTCATCAGTTATTCCCATCATGCAACAGGCAGTGCAGATAAACGGATTCCAGACTCCATCATTTCTCGTGGTGTTCAGGTGCTCCCACGAGACACAGCCTCCCTTAGCACTACTCCTTCAGAATCGCCCCGTGCTCAGGCTACATCTCGCCTCTCTACAGCTTCTTGTCCAACACCAAAAGTCCAGTCCAGGTGCAGCAGCAAGGAGAACATTCTAA	MQQLLLQRSIHSTPVLLFSWQIMGSPSLVSSVIPIMQQAVQINGFQTPSFLVVFRCSHETQPPLALLLQNRPVLRLHLASLQLLVQHQKSSPGAAARRTF	lcl|GPHN_4:714-1016_ORF2_GPHN_4:713:1015	['GPHN_105_ORF2', 'GPHN_116_ORF1', 'GPHN_119_ORF1', 'GPHN_143_ORF2', 'GPHN_144_ORF2', 'GPHN_164_ORF1', 'GPHN_171_ORF2', 'GPHN_185_ORF2', 'GPHN_190_ORF2', 'GPHN_241_ORF2', 'GPHN_254_ORF2', 'GPHN_38_ORF2', 'GPHN_4_ORF2', 'GPHN_51_ORF2', 'GPHN_57_ORF2', 'GPHN_77_ORF2', 'GPHN_95_ORF1']
GPHN_5	ORF1	455	49.62	GPHN	E40	ATGGCGACCGAGGGA	ATGGCGACCGAGGGAATGATCCTCACCAACCACGACCATCAAATCCGTGTCGGAGTCCTCACAGGTCACAGTGCTGTAGATATCACCAAGGTGGCTAGAAGACATCGCATGTCTCCTTTTCCCCTGACGTCTATGGACAAAGCCTTCATTACAGTCCTGGAGATGACTCCGGTGCTTGGTACAGAAATCATCAATTACCGAGATGGAATGGGGCGAGTCCTTGCTCAAGATGTATATGCAAAAGACAACCTACCCCCATTCCCTGCATCAGTAAAAGATGGCTATGCTGTTCGAGCTGCTGATGGTCCAGGGGATCGTTTCATCATTGGGGAATCCCAAGCTGGTGAGCAGCCAACTCAGACAGTAATGCCAGGACAAGTGATGCGGGTTACAACAGGT…	MATEGMILTNHDHQIRVGVLTGHSAVDITKVARRHRMSPFPLTSMDKAFITVLEMTPVLGTEIINYRDGMGRVLAQDVYAKDNLPPFPASVKDGYAVRAADGPGDRFIIGESQAGEQPTQTVMPGQVMRVTTGAPIPCGADAVVQVEDTELIRESDDGTEELEVRILVQARPGQDIRPIGHDIKRGECVLAKGTHMGPSEIGLLATVGVTEVEVNKFPVVAVMSTGNELLNPEDDLLPGKIRDSNRSTLLATIQEHGYPTINLGIVGDNPDDLLNALNEGISRADVIITSGGVSMGEKDYLKQVLDIDLHAQIHFGRVFMKPGLPTTFATLDIDGVRKIIFALPGNPVSAVVTCNLFVVPALRKMQGILDPRPTIIKARLSCDVKLDPRPEYHRCILTW…	lcl|GPHN_5:8-1375_ORF1_GPHN_5:7:1374	['GPHN_5_ORF1']
GPHN_6	ORF1	769	83.48	GPHN	E40	ATGGCGACCGAGGGA	ATGGCGACCGAGGGAATGATCCTCACCAACCACGACCATCAAATCCGTGTCGGAGTCCTCACAGTGAGTGATAGCTGCTTCAGGAATCTTGCAGAAGACCGCAGTGGGATAAATCTAAAAGATCTTGTCCAAGATCCTTCTTTGTTGGGTGGGACTATATCGGCATACAAGATAGTACCAGATGAAATAGAAGAAATCAAGGAAACACTCATAGACTGGTGTGATGAAAAGGAACTTAATTTAATATTAACAACTGGAGGAACGGGGTTTGCACCACGAGATGTCACTCCAGAGGCCACAAAAGAAGTAATAGAGCGGGAAGCGCCAGGGATGGCCCTGGCAATGCTGATGGGATCGCTCAATGTCACACCTCTGGGCATGCTCTCTAGACCAGTGTGT…	MATEGMILTNHDHQIRVGVLTVSDSCFRNLAEDRSGINLKDLVQDPSLLGGTISAYKIVPDEIEEIKETLIDWCDEKELNLILTTGGTGFAPRDVTPEATKEVIEREAPGMALAMLMGSLNVTPLGMLSRPVCGIRGKTLIINLPGSKKGSQECFQFILPALPHAIDLLRDAIVKVKEVHDELEDLPSPPPPLSPPPTTSPHKQTEDKGVQCEEEEEEKKDSGVASTEDSSSSHITAAALAAKIPDSIISRGVQVLPRDTASLSTTPSESPRAQATSRLSTASCPTPKQIRRPDESKGVASRVGSLKYLLSLGDFVHKTFKVQSRCSSKENILRASHSAVDITKVARRHRMSPFPLTSMDKAFITVLEMTPVLGTEIINYRDGMGRVLAQDVYAKDNLP…	lcl|GPHN_6:8-2317_ORF1_GPHN_6:7:2316	['GPHN_6_ORF1']
GPHN_7	ORF1	409	44.43	GPHN	E40	ATGGCGACCGAGGGA	ATGGCGACCGAGGGAATGATCCTCACCAACCACGACCATCAAATCCGTGTCGGAGTCCTCACAGATGGAATGGGGCGAGTCCTTGCTCAAGATGTATATGCAAAAGACAACCTACCCCCATTCCCTGCATCAGTAAAAGATGGCTATGCTGTTCGAGCTGCTGATGGTCCAGGGGATCGTTTCATCATTGGGGAATCCCAAGCTGGTGAGCAGCCAACTCAGACAGTAATGCCAGGACAAGTGATGCGGGTTACAACAGGTGCTCCAATCCCCTGCGGTGCTGATGCAGTAGTGCAAGTTGAAGATACTGAACTCATCAGGGAATCAGATGATGGTACTGAAGAACTTGAAGTACGAATTCTGGTGCAAGCTCGGCCAGGCCAAGATATCCGACCCATC…	MATEGMILTNHDHQIRVGVLTDGMGRVLAQDVYAKDNLPPFPASVKDGYAVRAADGPGDRFIIGESQAGEQPTQTVMPGQVMRVTTGAPIPCGADAVVQVEDTELIRESDDGTEELEVRILVQARPGQDIRPIGHDIKRGECVLAKGTHMGPSEIGLLATVGVTEVEVNKFPVVAVMSTGNELLNPEDDLLPGKIRDSNRSTLLATIQEHGYPTINLGIVGDNPDDLLNALNEGISRADVIITSGGVSMGEKDYLKQVLDIDLHAQIHFGRVFMKPGLPTTFATLDIDGVRKIIFALPGNPVSAVVTCNLFVVPALRKMQGILDPRPTIIKARLSCDVKLDPRPEYHRCILTWHHQEPLPWAQSTGNQMSSRLMSMRSANGLLMLPPKTEQYVELHKGE…	lcl|GPHN_7:8-1237_ORF1_GPHN_7:7:1236	['GPHN_7_ORF1']
GPHN_8	ORF1	757	82.37	GPHN	E40	ATGGCGACCGAGGGA	ATGGCGACCGAGGGAATGATCCTCACCAACCACGACCATCAAATCCGTGTCGGAGTCCTCACAGTGAGTGATAGCTGCTTCAGGAATCTTGCAGAAGACCGCAGTGGGATAAATCTAAAAGATCTTGTCCAAGATCCTTCTTTGTTGGGTGGGACTATATCGGCATACAAGATAGTACCAGATGAAATAGAAGAAATCAAGGAAACACTCATAGACTGGTGTGATGAAAAGGAACTTAATTTAATATTAACAACTGGAGGAACGGGGTTTGCACCACGAGATGTCACTCCAGAGGCCACAAAAGAAGTAATAGAGCGGGAAGCGCCAGGGATGGCCCTGGCAATGCTGATGGGATCGCTCAATGTCACACCTCTGGGCATGCTCTCTAGACCAGTGTGT…	MATEGMILTNHDHQIRVGVLTVSDSCFRNLAEDRSGINLKDLVQDPSLLGGTISAYKIVPDEIEEIKETLIDWCDEKELNLILTTGGTGFAPRDVTPEATKEVIEREAPGMALAMLMGSLNVTPLGMLSRPVCGIRGKTLIINLPGSKKGSQECFQFILPALPHAIDLLRDAIVKVKEVHDELEDLPSPPPPLSPPPTTSPHKQTEDKGVQCEEEEEEKKDSGVASTEDSSSSHITAAALAAKIPDSIISRGVQVLPRDTASLSTTPSESPRAQATSRLSTASCPTPKLHSRLEGLKDELWRNRGYDLRVQSRCSSKENILRASHSAVDITKVARRHRMSPFPLTSMDKAFITVLEMTPVLGTEIINYRDGMGRVLAQDVYAKDNLPPFPASVKDGYAV…	lcl|GPHN_8:8-2281_ORF1_GPHN_8:7:2280	['GPHN_8_ORF1']
GPHN_9	ORF1	750	81.23	GPHN	E40	ATGGCGACCGAGGGA	ATGGCGACCGAGGGAATGATCCTCACCAACCACGACCATCAAATCCGTGTCGGAGTCCTCACAGTGAGTGATAGCTGCTTCAGGAATCTTGCAGAAGACCGCAGTGGGATAAATCTAAAAGATCTTGTCCAAGATCCTTCTTTGTTGGGTGGGACTATATCGGCATACAAGATAGTACCAGATGAAATAGAAGAAATCAAGGAAACACTCATAGACTGGTGTGATGAAAAGGAACTTAATTTAATATTAACAACTGGAGGAACGGGGTTTGCACCACGAGATGTCACTCCAGAGGCCACAAAAGAAGTAATAGAGCGGGAAGCGCCAGGGATGGCCCTGGCAATGCTGATGGGATCGCTCAATGTCACACCTCTGGGCATGCTCTCTAGACCAGTGTGT…	MATEGMILTNHDHQIRVGVLTVSDSCFRNLAEDRSGINLKDLVQDPSLLGGTISAYKIVPDEIEEIKETLIDWCDEKELNLILTTGGTGFAPRDVTPEATKEVIEREAPGMALAMLMGSLNVTPLGMLSRPVCGIRGKTLIINLPGSKKGSQECFQFILPALPHAIDLLRDAIVKVKEVHDELEDLPSPPPPLSPPPTTSPHKQTEDKGVQCEEEEEEKKDSGVASTEDSSSSHITAAALAAKIPDSIISRGVQVLPRDTASLSTTPSESPRAQATSRLSTASCPTPKARLPSCSSTYSVSEVQSRCSSKENILRASHSAVDITKVARRHRMSPFPLTSMDKAFITVLEMTPVLGTEIINYRDGMGRVLAQDVYAKDNLPPFPASVKDGYAVRAADGPG…	lcl|GPHN_9:8-2260_ORF1_GPHN_9:7:2259	['GPHN_9_ORF1']
GPHN_10	ORF1	515	55.99	GPHN	E40	ATGGCGACCGAGGGA	ATGGCGACCGAGGGAATGATCCTCACCAACCACGACCATCAAATCCGTGTCGGAGTCCTCACAGTGAGTGATAGCTGCTTCAGGAATCTTGCAGAAGACCGCAGTGGGATAAATCTAAAAGATCTTGTCCAAGATCCTTCTTTGTTGGGTGGGACTATATCGGCATACAAGATAGTACCAGATGAAATAGAAGAAATCAAGGAAACACTCATAGACTGGTGTGATGAAAAGGAACTTAATTTAATATTAACAACTGGAGGAACGGGGTTTGCACCACGAGATGTCACTCCAGAGGCCACAAAAGAAGTAATAGAGCGGGAAGCGCCAGGGATGGCCCTGGCAATGCTGATGGGATCGCTCAATGTCACACCTCTGGGCATGCTCTCTAGACCAGTGTGT…	MATEGMILTNHDHQIRVGVLTVSDSCFRNLAEDRSGINLKDLVQDPSLLGGTISAYKIVPDEIEEIKETLIDWCDEKELNLILTTGGTGFAPRDVTPEATKEVIEREAPGMALAMLMGSLNVTPLGMLSRPVCGIRGKTLIINLPGSKKGSQECFQFILPALPHAIDLLRDAIVKVKEVHDELEDLPSPPPPLSPPPTTSPHKQTEDKGVQCEEEEEEKKDSGVASTEDSSSSHITAAALAAKIPDSIISRGVQVLPRDTASLSTTPSESPRAQATSRLSTASCPTPKLLNPEDDLLPGKIRDSNRSTLLATIQEHGYPTINLGIVGDNPDDLLNALNEGISRADVIITSGGVSMGEKDYLKQVLDIDLHAQIHFGRVFMKPGLPTTFATLDIDGVRKI…	lcl|GPHN_10:8-1555_ORF1_GPHN_10:7:1554	['GPHN_10_ORF1']
GPHN_11	ORF1	691	75.1	GPHN	E40	ATGGCGACCGAGGGA	ATGGCGACCGAGGGAATGATCCTCACCAACCACGACCATCAAATCCGTGTCGGAGTCCTCACAGTGAGTGATAGCTGCTTCAGGAATCTTGCAGAAGACCGCAGTGGGATAAATCTAAAAGATCTTGTCCAAGATCCTTCTTTGTTGGGTGGGACTATATCGGCATACAAGATAGTACCAGATGAAATAGAAGAAATCAAGGAAACACTCATAGACTGGTGTGATGAAAAGGAACTTAATTTAATATTAACAACTGGAGGAACGGGGTTTGCACCACGAGATGTCACTCCAGAGGCCACAAAAGAAGTAATAGAGCGGGAAGCGCCAGGGATGGCCCTGGCAATGCTGATGGGATCGCTCAATGTCACACCTCTGGGCATGCTCTCTAGACCAGTGTGT…	MATEGMILTNHDHQIRVGVLTVSDSCFRNLAEDRSGINLKDLVQDPSLLGGTISAYKIVPDEIEEIKETLIDWCDEKELNLILTTGGTGFAPRDVTPEATKEVIEREAPGMALAMLMGSLNVTPLGMLSRPVCGIRGKTLIINLPGSKKGSQECFQFILPALPHAIDLLRDAIVKVKEVHDELEDLPSPPPPLSPPPTTSPHKQTEDKGVQCEEEEEEKKDSGVASTEDSSSSHITAAALAAKVQSRCSSKENILRASHSAVDITKVARRHRMSPFPLTSMDKAFITVLEMTPVLGTEIINYRDGMGRVLAQDVYAKDNLPPFPASVKDGYAVRAADGPGDRFIIGESQAGEQPTQTVMPGQVMRVTTGAPIPCGADAVVQVEDTELIRESDDGTEELE…	lcl|GPHN_11:8-2083_ORF1_GPHN_11:7:2082	['GPHN_11_ORF1']
GPHN_12	ORF1	790	86.08	GPHN	E40	ATGGCGACCGAGGGA	ATGGCGACCGAGGGAATGATCCTCACCAACCACGACCATCAAATCCGTGTCGGAGTCCTCACAGTGAGTGATAGCTGCTTCAGGAATCTTGCAGAAGACCGCAGTGGGATAAATCTAAAAGATCTTGTCCAAGATCCTTCTTTGTTGGGTGGGACTATATCGGCATACAAGATAGTACCAGATGAAATAGAAGAAATCAAGGAAACACTCATAGACTGGTGTGATGAAAAGGAACTTAATTTAATATTAACAACTGGAGGAACGGGGTTTGCACCACGAGATGTCACTCCAGAGGCCACAAAAGAAGTAATAGAGCGGGAAGCGCCAGGGATGGCCCTGGCAATGCTGATGGGATCGCTCAATGTCACACCTCTGGGCATGCTCTCTAGACCAGTGTGT…	MATEGMILTNHDHQIRVGVLTVSDSCFRNLAEDRSGINLKDLVQDPSLLGGTISAYKIVPDEIEEIKETLIDWCDEKELNLILTTGGTGFAPRDVTPEATKEVIEREAPGMALAMLMGSLNVTPLGMLSRPVCGIRGKTLIINLPGSKKGSQECFQFILPALPHAIDLLRDAIVKVKEVHDELEDLPSPPPPLSPPPTTSPHKQTEDKGVQCEEEEEEKKDSGVASTEDSSSSHITAAALAAKIPDSIISRGVQVLPRDTASLSTTPSESPRAQATSRLSTASCPTPKQIRRPDESKGVASRVGSLKYLLSLGDFVHKTFKLHSRLEGLKDELWRNRGYDLRVQSRCSSKENILRASHSAVDITKVARRHRMSPFPLTSMDKAFITVLEMTPVLGTEII…	lcl|GPHN_12:8-2380_ORF1_GPHN_12:7:2379	['GPHN_12_ORF1']
	ORF2	105	12.21	unknown	PTC	CTGCAGCAGCTCTTG	CTGCAGCAGCTCTTGCTGCAAAGATTCCAGACTCCATCATTTCTCGTGGTGTTCAGGTGCTCCCACGAGACACAGCCTCCCTTAGCACTACTCCTTCAGAATCGCCCCGTGCTCAGGCTACATCTCGCCTCTCTACAGCTTCTTGTCCAACACCAAAACAAATTAGACGGCCGGATGAAAGCAAAGGAGTTGCTAGTAGAGTTGGATCCCTCAAATATCTATTATCACTGGGAGATTTTGTACATAAAACATTTAAGCTCCACTCTAGATTGGAAGGGCTTAAAGATGAACTCTGGAGGAATAGAGGCTACGACTTAA	MQQLLLQRFQTPSFLVVFRCSHETQPPLALLLQNRPVLRLHLASLQLLVQHQNKLDGRMKAKELLVELDPSNIYYHWEILYIKHLSSTLDWKGLKMNSGGIEATT	lcl|GPHN_12:714-1031_ORF2_GPHN_12:713:1030	['GPHN_103_ORF2', 'GPHN_12_ORF2', 'GPHN_178_ORF2', 'GPHN_180_ORF1', 'GPHN_263_ORF2', 'GPHN_273_ORF2', 'GPHN_48_ORF2']
GPHN_13	ORF1	658	71.4	GPHN	E40	ATGGCGACCGAGGGA	ATGGCGACCGAGGGAATGATCCTCACCAACCACGACCATCAAATCCGTGTCGGAGTCCTCACAGTGAGTGATAGCTGCTTCAGGAATCTTGCAGAAGACCGCAGTGGGATAAATCTAAAAGATCTTGTCCAAGATCCTTCTTTGTTGGGTGGGACTATATCGGCATACAAGATAGTACCAGATGAAATAGAAGAAATCAAGGAAACACTCATAGACTGGTGTGATGAAAAGGAACTTAATTTAATATTAACAACTGGAGGAACGGGGTTTGCACCACGAGATGTCACTCCAGAGAAATTCCCAACATTCCCATTTTGTGGGCTCCAGAAAGGGGCCACAAAAGAAGTAATAGAGCGGGAAGCGCCAGGGATGGCCCTGGCAATGCTGATGGGATCGCTC…	MATEGMILTNHDHQIRVGVLTVSDSCFRNLAEDRSGINLKDLVQDPSLLGGTISAYKIVPDEIEEIKETLIDWCDEKELNLILTTGGTGFAPRDVTPEKFPTFPFCGLQKGATKEVIEREAPGMALAMLMGSLNVTPLGMLSRPVCGIRGKTLIINLPGSKKGSQIPDSIISRGVQVLPRDTASLSTTPSESPRAQATSRLSTASCPTPKVQSRCSSKENILRASHSAVDITKVARRHRMSPFPLTSMDKAFITVLEMTPVLGTEIINYRDGMGRVLAQDVYAKDNLPPFPASVKDGYAVRAADGPGDRFIIGESQAGEQPTQTVMPGQVMRVTTGAPIPCGADAVVQVEDTELIRESDDGTEELEVRILVQARPGQDIRPIGHDIKRGECVLAKGTHM…	lcl|GPHN_13:8-1984_ORF1_GPHN_13:7:1983	['GPHN_13_ORF1']
GPHN_14	ORF1	705	76.34	GPHN	E40	ATGGCGACCGAGGGA	ATGGCGACCGAGGGAATGATCCTCACCAACCACGACCATCAAATCCGTGTCGGAGTCCTCACAGTGAGTGATAGCTGCTTCAGGAATCTTGCAGAAGACCGCAGTGGGATAAATCTAAAAGATCTTGTCCAAGATCCTTCTTTGTTGGGTGGGACTATATCGGCATACAAGATAGTACCAGATGAAATAGAAGAAATCAAGGCCACAAAAGAAGTAATAGAGCGGGAAGCGCCAGGGATGGCCCTGGCAATGCTGATGGGATCGCTCAATGTCACACCTCTGGGCATGCTCTCTAGACCAGTGTGTGGAATAAGGGGGAAAACTCTGATAATTAACCTACCTGGTAGCAAGAAAGGATCTCAGGAATGCTTTCAGTTCATACTGCCAGCTCTACCTCAT…	MATEGMILTNHDHQIRVGVLTVSDSCFRNLAEDRSGINLKDLVQDPSLLGGTISAYKIVPDEIEEIKATKEVIEREAPGMALAMLMGSLNVTPLGMLSRPVCGIRGKTLIINLPGSKKGSQECFQFILPALPHAIDLLRDAIVKVKEVHDELEDLPSPPPPLSPPPTTSPHKQTEDKGVQCEEEEEEKKDSGVASTEDSSSSHITAAALAAKIPDSIISRGVQVLPRDTASLSTTPSESPRAQATSRLSTASCPTPKVQSRCSSKENILRASHSAVDITKVARRHRMSPFPLTSMDKAFITVLEMTPVLGTEIINYRDGMGRVLAQDVYAKDNLPPFPASVKDGYAVRAADGPGDRFIIGESQAGEQPTQTVMPGQVMRVTTGAPIPCGADAVVQVEDT…	lcl|GPHN_14:8-2125_ORF1_GPHN_14:7:2124	['GPHN_14_ORF1']
GPHN_15	ORF1	419	45.61	GPHN	E40	ATGTCTCCTTTTCCC	ATGTCTCCTTTTCCCCTGACGTCTATGGACAAAGCCTTCATTACAGTCCTGGAGATGACTCCGGTGCTTGGTACAGAAATCATCAATTACCGAGATGGAATGGGGCGAGTCCTTGCTCAAGATGTATATGCAAAAGACAACCTACCCCCATTCCCTGCATCAGTAAAAGATGGCTATGCTGTTCGAGCTGCTGATGGTCCAGGGGATCGTTTCATCATTGGGGAATCCCAAGCTGGTGAGCAGCCAACTCAGACAGTAATGCCAGGACAAGTGATGCGGGTTACAACAGGTGCTCCAATCCCCTGCGGTGCTGATGCAGTAGTGCAAGTTGAAGATACTGAACTCATCAGGGAATCAGATGATGGTACTGAAGAACTTGAAGTACGAATTCTGGTGCAA…	MSPFPLTSMDKAFITVLEMTPVLGTEIINYRDGMGRVLAQDVYAKDNLPPFPASVKDGYAVRAADGPGDRFIIGESQAGEQPTQTVMPGQVMRVTTGAPIPCGADAVVQVEDTELIRESDDGTEELEVRILVQARPGQDIRPIGHDIKRGECVLAKGTHMGPSEIGLLATVGVTEVEVNKFPVVAVMSTGNELLNPEDDLLPGKIRDSNRSTLLATIQEHGYPTINLGIVGDNPDDLLNALNEGISRADVIITSGGVSMGEKDYLKQVLDIDLHAQIHFGRVFMKPGLPTTFATLDIDGVRKIIFALPGNPVSAVVTCNLFVVPALRKMQGILDPRPTIIKARLSCDVKLDPRPEYHRCILTWHHQEPLPWAQSTGNQMSSRLMSMRSANGLLMLPPKT…	lcl|GPHN_15:159-1418_ORF1_GPHN_15:158:1417	['GPHN_110_ORF1', 'GPHN_15_ORF1', 'GPHN_173_ORF1', 'GPHN_192_ORF2', 'GPHN_209_ORF3', 'GPHN_227_ORF2', 'GPHN_228_ORF2', 'GPHN_257_ORF1', 'GPHN_264_ORF2', 'GPHN_265_ORF2', 'GPHN_268_ORF2', 'GPHN_30_ORF1', 'GPHN_36_ORF1', 'GPHN_52_ORF1', 'GPHN_80_ORF2']
GPHN_16	ORF1	782	84.93	GPHN	E40	ATGGCGACCGAGGGA	ATGGCGACCGAGGGAATGATCCTCACCAACCACGACCATCAAATCCGTGTCGGAGTCCTCACAGTGAGTGATAGCTGCTTCAGGAATCTTGCAGAAGACCGCAGTGGGATAAATCTAAAAGATCTTGTCCAAGATCCTTCTTTGTTGGGTGGGACTATATCGGCATACAAGATAGTACCAGATGAAATAGAAGAAATCAAGGAAACACTCATAGACTGGTGTGATGAAAAGGAACTTAATTTAATATTAACAACTGGAGGAACGGGGTTTGCACCACGAGATGTCACTCCAGAGAAATTCCCAACATTCCCATTTTGTGGGCTCCAGAAAGGGGCCACAAAAGAAGTAATAGAGCGGGAAGCGCCAGGGATGGCCCTGGCAATGCTGATGGGATCGCTC…	MATEGMILTNHDHQIRVGVLTVSDSCFRNLAEDRSGINLKDLVQDPSLLGGTISAYKIVPDEIEEIKETLIDWCDEKELNLILTTGGTGFAPRDVTPEKFPTFPFCGLQKGATKEVIEREAPGMALAMLMGSLNVTPLGMLSRPVCGIRGKTLIINLPGSKKGSQECFQFILPALPHAIDLLRDAIVKVKEVHDELEDLPSPPPPLSPPPTTSPHKQTEDKGVQCEEEEEEKKDSGVASTEDSSSSHITAAALAAKIPDSIISRGVQVLPRDTASLSTTPSESPRAQATSRLSTASCPTPKQIRRPDESKGVASRVGSLKYLLSLGDFVHKTFKVQSRCSSKENILRASHSAVDITKVARRHRMSPFPLTSMDKAFITVLEMTPVLGTEIINYRDGMGR…	lcl|GPHN_16:8-2356_ORF1_GPHN_16:7:2355	['GPHN_16_ORF1']
GPHN_17	ORF1	439	47.89	GPHN	E40	TTGTCCAACACCAAA	TTGTCCAACACCAAAAGTCACAGTGCTGTAGATATCACCAAGGTGGCTAGAAGACATCGCATGTCTCCTTTTCCCCTGACGTCTATGGACAAAGCCTTCATTACAGTCCTGGAGATGACTCCGGTGCTTGGTACAGAAATCATCAATTACCGAGATGGAATGGGGCGAGTCCTTGCTCAAGATGTATATGCAAAAGACAACCTACCCCCATTCCCTGCATCAGTAAAAGATGGCTATGCTGTTCGAGCTGCTGATGGTCCAGGGGATCGTTTCATCATTGGGGAATCCCAAGCTGGTGAGCAGCCAACTCAGACAGTAATGCCAGGACAAGTGATGCGGGTTACAACAGGTGCTCCAATCCCCTGCGGTGCTGATGCAGTAGTGCAAGTTGAAGATACT…	MSNTKSHSAVDITKVARRHRMSPFPLTSMDKAFITVLEMTPVLGTEIINYRDGMGRVLAQDVYAKDNLPPFPASVKDGYAVRAADGPGDRFIIGESQAGEQPTQTVMPGQVMRVTTGAPIPCGADAVVQVEDTELIRESDDGTEELEVRILVQARPGQDIRPIGHDIKRGECVLAKGTHMGPSEIGLLATVGVTEVEVNKFPVVAVMSTGNELLNPEDDLLPGKIRDSNRSTLLATIQEHGYPTINLGIVGDNPDDLLNALNEGISRADVIITSGGVSMGEKDYLKQVLDIDLHAQIHFGRVFMKPGLPTTFATLDIDGVRKIIFALPGNPVSAVVTCNLFVVPALRKMQGILDPRPTIIKARLSCDVKLDPRPEYHRCILTWHHQEPLPWAQSTGNQM…	lcl|GPHN_17:856-2175_ORF1_GPHN_17:855:2174	['GPHN_100_ORF1', 'GPHN_101_ORF1', 'GPHN_151_ORF1', 'GPHN_17_ORF1', 'GPHN_182_ORF2', 'GPHN_244_ORF1', 'GPHN_67_ORF1']
	ORF2	292	31.29	GPHN	PTC	ATGGCGACCGAGGGA	ATGGCGACCGAGGGAATGATCCTCACCAACCACGACCATCAAATCCGTGTCGGAGTCCTCACAGTGAGTGATAGCTGCTTCAGGAATCTTGCAGAAGACCGCAGTGGGATAAATCTAAAAGATCTTGTCCAAGATCCTTCTTTGTTGGGTGGGACTATATCGGCATACAAGATAGTACCAGATGAAATAGAAGAAATCAAGGAAACACTCATAGACTGGTGTGATGAAAAGGAACTTAATTTAATATTAACAACTGGAGGAACGGGGTTTGCACCACGAGATGTCACTCCAGAGGCCACAAAAGAAGTAATAGAGCGGGAAGCGCCAGGGATGGCCCTGGCAATGCTGATGGGATCGCTCAATGTCACACCTCTGGGCATGCTCTCTAGACCAGTGTGT…	MATEGMILTNHDHQIRVGVLTVSDSCFRNLAEDRSGINLKDLVQDPSLLGGTISAYKIVPDEIEEIKETLIDWCDEKELNLILTTGGTGFAPRDVTPEATKEVIEREAPGMALAMLMGSLNVTPLGMLSRPVCGIRGKTLIINLPGSKKGSQECFQFILPALPHAIDLLRDAIVKVKEVHDELEDLPSPPPPLSPPPTTSPHKQTEDKGVQCEEEEEEKKDSGVASTEDSSSSHITAAALAAKIPDSIISRGVQVLPRDTASLSTTPSESPRAQATSRLSTASCPTPKVTVL	lcl|GPHN_17:8-886_ORF2_GPHN_17:7:885	['GPHN_17_ORF2', 'GPHN_195_ORF2']
GPHN_18	ORF1	678	73.67	GPHN	E40	ATGGCGACCGAGGGA	ATGGCGACCGAGGGAATGATCCTCACCAACCACGACCATCAAATCCGTGTCGGAGTCCTCACAGTGAGTGATAGCTGCTTCAGGAATCTTGCAGAAGACCGCAGTGGGATAAATCTAAAAGATCTTGTCCAAGATCCTTCTTTGTTGGGTGGGACTATATCGGCATACAAGATAGTACCAGATGAAATAGAAGAAATCAAGGAAACACTCATAGACTGGTGTGATGAAAAGGAACTTAATTTAATATTAACAACTGGAGGAACGGGGTTTGCACCACGAGATGTCACTCCAGAGGCCACAAAAGAAGTAATAGAGCGGGAAGCGCCAGGGATGGCCCTGGCAATGCTGATGGGATCGCTCAATGTCACACCTCTGGGCATGCTCTCTAGACCAGTGTGT…	MATEGMILTNHDHQIRVGVLTVSDSCFRNLAEDRSGINLKDLVQDPSLLGGTISAYKIVPDEIEEIKETLIDWCDEKELNLILTTGGTGFAPRDVTPEATKEVIEREAPGMALAMLMGSLNVTPLGMLSRPVCGIRGKTLIINLPGSKKGSQIPDSIISRGVQVLPRDTASLSTTPSESPRAQATSRLSTASCPTPKQIRRPDESKGVASRVGSLKYLLSLGDFVHKTFKVQSRCSSKENILRASHSAVDITKVARRHRMSPFPLTSMDKAFITVLEMTPVLGTEIINYRDGMGRVLAQDVYAKDNLPPFPASVKDGYAVRAADGPGDRFIIGESQAGEQPTQTVMPGQVMRVTTGAPIPCGADAVVQVEDTELIRESDDGTEELEVRILVQARPGQDI…	lcl|GPHN_18:8-2044_ORF1_GPHN_18:7:2043	['GPHN_18_ORF1']
GPHN_19	ORF1	690	74.55	GPHN	E40	ATGGCGACCGAGGGA	ATGGCGACCGAGGGAATGATCCTCACCAACCACGACCATCAAATCCGTGTCGGAGTCCTCACAGTGAGTGATAGCTGCTTCAGGAATCTTGCAGAAGACCGCAGTGGGATAAATCTAAAAGATCTTGTCCAAGATCCTTCTTTGTTGGGTGGGACTATATCGGCATACAAGATAGTACCAGATGAAATAGAAGAAATCAAGGAAACACTCATAGACTGGTGTGATGAAAAGGAACTTAATTTAATATTAACAACTGGAGGAACGGGGTTTGCACCACGAGATGTCACTCCAGAGGCCACAAAAGAAGTAATAGAGCGGGAAGCGCCAGGGATGGCCCTGGCAATGCTGATGGGATCGCTCAATGTCACACCTCTGGGCATGCTCTCTAGACCAGTGTGT…	MATEGMILTNHDHQIRVGVLTVSDSCFRNLAEDRSGINLKDLVQDPSLLGGTISAYKIVPDEIEEIKETLIDWCDEKELNLILTTGGTGFAPRDVTPEATKEVIEREAPGMALAMLMGSLNVTPLGMLSRPVCGIRGKTLIINLPGSKKGSQECFQFILPALPHAIDLLRDAIVKVKEVHDELEDLPSPPPPLSPPPTTSPHKQTEDKGVQCEEEEEEKKDSGVASTEDSSSSHITAAALAAKIPDSIISRGVQVLPRDTASLSTTPSESPRAQATSRLSTASCPTPKVQSRCSSKENILRANGMGRVLAQDVYAKDNLPPFPASVKDGYAVRAADGPGDRFIIGESQAGEQPTQTVMPGQVMRVTTGAPIPCGADAVVQVEDTELIRESDDGTEELEV…	lcl|GPHN_19:8-2080_ORF1_GPHN_19:7:2079	['GPHN_19_ORF1']
GPHN_20	ORF1	325	35.9	GPHN	E40	ATGGCGACCGAGGGA	ATGGCGACCGAGGGAATGATCCTCACCAACCACGACCATCAAATCCGTGTCGGAGTCCTCACAGTGAGTGATAGCTGCTTCAGGAATCTTGCAGAAGACCGCAGTGGGATAAATCTAAAAGATCTTGTCCAAGATCCTTCTTTGTTGGGTGGGACTATATCGGCATACAAGATAGTACCAGATGAAATAGAAGAAATCAAGGAAACACTCATAGACTGGTGTGATGAAAAGGAACTTAATTTAATATTAACAACTGGAGGAACGGGGTTTGCACCACGAGATGTCACTCCAGAGCTGCTAAATCCTGAAGATGATCTCTTACCAGGAAAGATTCGGGACAGCAATCGATCAACACTTCTAGCAACAATTCAGGAACATGGTTACCCAACAATCAACCTG…	MATEGMILTNHDHQIRVGVLTVSDSCFRNLAEDRSGINLKDLVQDPSLLGGTISAYKIVPDEIEEIKETLIDWCDEKELNLILTTGGTGFAPRDVTPELLNPEDDLLPGKIRDSNRSTLLATIQEHGYPTINLGIVGDNPDDLLNALNEGISRADVIITSGGVSMGEKDYLKQVLDIDLHAQIHFGRVFMKPGLPTTFATLDIDGVRKIIFALPGNPVSAVVTCNLFVVPALRKMQGILDPRPTIIKARLSCDVKLDPRPEYHRCILTWHHQEPLPWAQSTGNQMSSRLMSMRSANGLLMLPPKTEQYVELHKGEVVDVMVIGRL	lcl|GPHN_20:8-985_ORF1_GPHN_20:7:984	['GPHN_20_ORF1']
GPHN_21	ORF1	663	71.39	GPHN	E40	ATGGCGACCGAGGGA	ATGGCGACCGAGGGAATGATCCTCACCAACCACGACCATCAAATCCGTGTCGGAGTCCTCACAGTGAGTGATAGCTGCTTCAGGAATCTTGCAGAAGACCGCAGTGGGATAAATCTAAAAGATCTTGTCCAAGATCCTTCTTTGTTGGGTGGGACTATATCGGCATACAAGATAGTACCAGATGAAATAGAAGAAATCAAGGAAACACTCATAGACTGGTGTGATGAAAAGGAACTTAATTTAATATTAACAACTGGAGGAACGGGGTTTGCACCACGAGATGTCACTCCAGAGGCCACAAAAGAAGTAATAGAGCGGGAAGCGCCAGGGATGGCCCTGGCAATGCTGATGGGATCGCTCAATGTCACACCTCTGGGCATGCTCTCTAGACCAGTGTGT…	MATEGMILTNHDHQIRVGVLTVSDSCFRNLAEDRSGINLKDLVQDPSLLGGTISAYKIVPDEIEEIKETLIDWCDEKELNLILTTGGTGFAPRDVTPEATKEVIEREAPGMALAMLMGSLNVTPLGMLSRPVCGIRGKTLIINLPGSKKGSQECFQFILPALPHAIDLLRDAIVKVKEVHDELEDLPSPPPPLSPPPTTSPHKQTEDKGVQCEEEEEEKKDSGVASTEDSSSSHITAAALAAKIPDSIISRGVQVLPRDTASLSTTPSESPRAQATSRLSTASCPTPKVQSRCSSKENILRASHSAVDITKVARRHRMSPFPLTSMDKAFITVLEMTPVLGTEIINYRDGMGRVLAQDVYAKDNLPPFPASVKDGYAVRAADGPGDRFIIGESQAGEQP…	lcl|GPHN_21:8-1999_ORF1_GPHN_21:7:1998	['GPHN_21_ORF1']
GPHN_22	ORF1	440	48.03	GPHN	E40	TTGTCCAAGATCCTT	TTGTCCAAGATCCTTCTTTGTCACAGTGCTGTAGATATCACCAAGGTGGCTAGAAGACATCGCATGTCTCCTTTTCCCCTGACGTCTATGGACAAAGCCTTCATTACAGTCCTGGAGATGACTCCGGTGCTTGGTACAGAAATCATCAATTACCGAGATGGAATGGGGCGAGTCCTTGCTCAAGATGTATATGCAAAAGACAACCTACCCCCATTCCCTGCATCAGTAAAAGATGGCTATGCTGTTCGAGCTGCTGATGGTCCAGGGGATCGTTTCATCATTGGGGAATCCCAAGCTGGTGAGCAGCCAACTCAGACAGTAATGCCAGGACAAGTGATGCGGGTTACAACAGGTGCTCCAATCCCCTGCGGTGCTGATGCAGTAGTGCAAGTTGAAGAT…	MSKILLCHSAVDITKVARRHRMSPFPLTSMDKAFITVLEMTPVLGTEIINYRDGMGRVLAQDVYAKDNLPPFPASVKDGYAVRAADGPGDRFIIGESQAGEQPTQTVMPGQVMRVTTGAPIPCGADAVVQVEDTELIRESDDGTEELEVRILVQARPGQDIRPIGHDIKRGECVLAKGTHMGPSEIGLLATVGVTEVEVNKFPVVAVMSTGNELLNPEDDLLPGKIRDSNRSTLLATIQEHGYPTINLGIVGDNPDDLLNALNEGISRADVIITSGGVSMGEKDYLKQVLDIDLHAQIHFGRVFMKPGLPTTFATLDIDGVRKIIFALPGNPVSAVVTCNLFVVPALRKMQGILDPRPTIIKARLSCDVKLDPRPEYHRCILTWHHQEPLPWAQSTGNQ…	lcl|GPHN_22:132-1454_ORF1_GPHN_22:131:1453	['GPHN_22_ORF1']
GPHN_23	ORF1	783	84.94	GPHN	E40	ATGGCGACCGAGGGA	ATGGCGACCGAGGGAATGATCCTCACCAACCACGACCATCAAATCCGTGTCGGAGTCCTCACAGTGAGTGATAGCTGCTTCAGGAATCTTGCAGAAGACCGCAGTGGGATAAATCTAAAAGATCTTGTCCAAGATCCTTCTTTGTTGGGTGGGACTATATCGGCATACAAGATAGTACCAGATGAAATAGAAGAAATCAAGGAAACACTCATAGACTGGTGTGATGAAAAGGAACTTAATTTAATATTAACAACTGGAGGAACGGGGTTTGCACCACGAGATGTCACTCCAGAGGCCACAAAAGAAGTAATAGAGCGGGAAGCGCCAGGGATGGCCCTGGCAATGCTGATGGGATCGCTCAATGTCACACCTCTGGGCATGCTCTCTAGACCAGTGTGT…	MATEGMILTNHDHQIRVGVLTVSDSCFRNLAEDRSGINLKDLVQDPSLLGGTISAYKIVPDEIEEIKETLIDWCDEKELNLILTTGGTGFAPRDVTPEATKEVIEREAPGMALAMLMGSLNVTPLGMLSRPVCGIRGKTLIINLPGSKKGSQECFQFILPALPHAIDLLRDAIVKVKEVHDELEDLPSPPPPLSPPPTTSPHKQTEDKGVQCEEEEEEKKDSGVASTEDSSSSHITAAALAAKIPDSIISRGVQVLPRDTASLSTTPSESPRAQATSRLSTASCPTPKQIRRPDESKGVASRVGSLKYLLSLGDFVHKTFKARLPSCSSTYSVSEVQSRCSSKENILRASHSAVDITKVARRHRMSPFPLTSMDKAFITVLEMTPVLGTEIINYRDGMG…	lcl|GPHN_23:8-2359_ORF1_GPHN_23:7:2358	['GPHN_23_ORF1']
	ORF2	111	13.08	unknown	PTC	CTGCAGCAGCTCTTG	CTGCAGCAGCTCTTGCTGCAAAGATTCCAGACTCCATCATTTCTCGTGGTGTTCAGGTGCTCCCACGAGACACAGCCTCCCTTAGCACTACTCCTTCAGAATCGCCCCGTGCTCAGGCTACATCTCGCCTCTCTACAGCTTCTTGTCCAACACCAAAACAAATTAGACGGCCGGATGAAAGCAAAGGAGTTGCTAGTAGAGTTGGATCCCTCAAATATCTATTATCACTGGGAGATTTTGTACATAAAACATTTAAGGCTCGGCTTCCGTCGTGCTCATCTACCTATAGTGTATCTGAGGTCCAGTCCAGGTGCAGCAGCAAGGAGAACATTCTAA	MQQLLLQRFQTPSFLVVFRCSHETQPPLALLLQNRPVLRLHLASLQLLVQHQNKLDGRMKAKELLVELDPSNIYYHWEILYIKHLRLGFRRAHLPIVYLRSSPGAAARRTF	lcl|GPHN_23:714-1049_ORF2_GPHN_23:713:1048	['GPHN_117_ORF2', 'GPHN_138_ORF2', 'GPHN_169_ORF1', 'GPHN_23_ORF2', 'GPHN_274_ORF2', 'GPHN_277_ORF2', 'GPHN_81_ORF2']
GPHN_24	ORF1	688	74.48	GPHN	E40	TTGGGTGGGACTATA	TTGGGTGGGACTATATCGGCATACAAGATAGTACCAGATGAAATAGAAGAAATCAAGGAAACACTCATAGACTGGTGTGATGAAAAGGAACTTAATTTAATATTAACAACTGGAGGAACGGGGTTTGCACCACGAGATGTCACTCCAGAGGCCACAAAAGAAGTAATAGAGCGGGAAGCGCCAGGGATGGCCCTGGCAATGCTGATGGGATCGCTCAATGTCACACCTCTGGGCATGCTCTCTAGACCAGTGTGTGGAATAAGGGGGAAAACTCTGATAATTAACCTACCTGGTAGCAAGAAAGGATCTCAGGAATGCTTTCAGTTCATACTGCCAGCTCTACCTCATGCCATTGACCTTTTACGTGATGCCATTGTAAAAGTAAAGGAGGTGCATGAT…	MGGTISAYKIVPDEIEEIKETLIDWCDEKELNLILTTGGTGFAPRDVTPEATKEVIEREAPGMALAMLMGSLNVTPLGMLSRPVCGIRGKTLIINLPGSKKGSQECFQFILPALPHAIDLLRDAIVKVKEVHDELEDLPSPPPPLSPPPTTSPHKQTEDKGVQCEEEEEEKKDSGVASTEDSSSSHITAAALAAKIPDSIISRGVQVLPRDTASLSTTPSESPRAQATSRLSTASCPTPKVQSRCSSKENILRASHSAVDITKVARRHRMSPFPLTSMDKAFITVLEMTPVLGTEIINYRDGMGRVLAQDVYAKDNLPPFPASVKDGYAVRAADGPGDRFIIGESQAGEQPTQTVMPGQVMRVTTGAPIPCGADAVVQVEDTELIRESDDGTEELEVRI…	lcl|GPHN_24:73-2139_ORF1_GPHN_24:72:2138	['GPHN_24_ORF1']
GPHN_25	ORF1	206	22.9	GPHN	E40	TTGTCCAACACCAAA	TTGTCCAACACCAAAAGTCCAGTCCAGGTGCAGCAGCAAGGAGAACATTCTAAGAGCCACCCAGATGACTTACTCAATGCCTTGAATGAGGGTATCAGCCGTGCTGATGTCATCATCACGTCAGGAGGTGTGTCCATGGGGGAAAAGGACTATCTCAAGCAGGTGCTGGACATTGATCTTCATGCTCAGATCCATTTTGGCAGAGTTTTTATGAAGCCAGGCTTGCCAACAACATTTGCAACTTTGGATATTGATGGTGTAAGAAAAATTATTTTTGCACTACCAGGGAATCCTGTATCAGCTGTGGTCACCTGCAACCTCTTTGTTGTACCTGCACTGAGAAAGATGCAGGGTATCTTGGATCCTCGGCCAACCATCATCAAAGCCAGGTTATCGTGT…	MSNTKSPVQVQQQGEHSKSHPDDLLNALNEGISRADVIITSGGVSMGEKDYLKQVLDIDLHAQIHFGRVFMKPGLPTTFATLDIDGVRKIIFALPGNPVSAVVTCNLFVVPALRKMQGILDPRPTIIKARLSCDVKLDPRPEYHRCILTWHHQEPLPWAQSTGNQMSSRLMSMRSANGLLMLPPKTEQYVELHKGEVVDVMVIGRL	lcl|GPHN_25:856-1476_ORF1_GPHN_25:855:1475	['GPHN_139_ORF1', 'GPHN_25_ORF1']
	ORF2	310	33.39	GPHN	PTC	ATGGCGACCGAGGGA	ATGGCGACCGAGGGAATGATCCTCACCAACCACGACCATCAAATCCGTGTCGGAGTCCTCACAGTGAGTGATAGCTGCTTCAGGAATCTTGCAGAAGACCGCAGTGGGATAAATCTAAAAGATCTTGTCCAAGATCCTTCTTTGTTGGGTGGGACTATATCGGCATACAAGATAGTACCAGATGAAATAGAAGAAATCAAGGAAACACTCATAGACTGGTGTGATGAAAAGGAACTTAATTTAATATTAACAACTGGAGGAACGGGGTTTGCACCACGAGATGTCACTCCAGAGGCCACAAAAGAAGTAATAGAGCGGGAAGCGCCAGGGATGGCCCTGGCAATGCTGATGGGATCGCTCAATGTCACACCTCTGGGCATGCTCTCTAGACCAGTGTGT…	MATEGMILTNHDHQIRVGVLTVSDSCFRNLAEDRSGINLKDLVQDPSLLGGTISAYKIVPDEIEEIKETLIDWCDEKELNLILTTGGTGFAPRDVTPEATKEVIEREAPGMALAMLMGSLNVTPLGMLSRPVCGIRGKTLIINLPGSKKGSQECFQFILPALPHAIDLLRDAIVKVKEVHDELEDLPSPPPPLSPPPTTSPHKQTEDKGVQCEEEEEEKKDSGVASTEDSSSSHITAAALAAKIPDSIISRGVQVLPRDTASLSTTPSESPRAQATSRLSTASCPTPKVQSRCSSKENILRATQMTYSMP	lcl|GPHN_25:8-940_ORF2_GPHN_25:7:939	['GPHN_25_ORF2']
GPHN_26	ORF1	699	76.28	GPHN	E40	ATGGCGACCGAGGGA	ATGGCGACCGAGGGAATGATCCTCACCAACCACGACCATCAAATCCGTGTCGGAGTCCTCACAGTGAGTGATAGCTGCTTCAGGAATCTTGCAGAAGACCGCAGTGGGATAAATCTAAAAGATCTTGTCCAAGATCCTTCTTTGTTGGGTGGGACTATATCGGCATACAAGATAGTACCAGATGAAATAGAAGAAATCAAGGAAACACTCATAGACTGGTGTGATGAAAAGGAACTTAATTTAATATTAACAACTGGAGGAACGGGGTTTGCACCACGAGATGTCACTCCAGAGGCCACAAAAGAAGTAATAGAGCGGGAAGCGCCAGGGATGGCCCTGGCAATGCTGATGGGATCGCTCAATGTCACACCTCTGGGCATGCTCTCTAGACCAGTGTGT…	MATEGMILTNHDHQIRVGVLTVSDSCFRNLAEDRSGINLKDLVQDPSLLGGTISAYKIVPDEIEEIKETLIDWCDEKELNLILTTGGTGFAPRDVTPEATKEVIEREAPGMALAMLMGSLNVTPLGMLSRPVCGIRGKTLIINLPGSKKGSQIPDSIISRGVQVLPRDTASLSTTPSESPRAQATSRLSTASCPTPKQIRRPDESKGVASRVGSLKYLLSLGDFVHKTFKLHSRLEGLKDELWRNRGYDLRVQSRCSSKENILRASHSAVDITKVARRHRMSPFPLTSMDKAFITVLEMTPVLGTEIINYRDGMGRVLAQDVYAKDNLPPFPASVKDGYAVRAADGPGDRFIIGESQAGEQPTQTVMPGQVMRVTTGAPIPCGADAVVQVEDTELIRES…	lcl|GPHN_26:8-2107_ORF1_GPHN_26:7:2106	['GPHN_26_ORF1']
	ORF2	105	12.17	unknown	PTC	CTGGTAGCAAGAAAG	CTGGTAGCAAGAAAGGATCTCAGATTCCAGACTCCATCATTTCTCGTGGTGTTCAGGTGCTCCCACGAGACACAGCCTCCCTTAGCACTACTCCTTCAGAATCGCCCCGTGCTCAGGCTACATCTCGCCTCTCTACAGCTTCTTGTCCAACACCAAAACAAATTAGACGGCCGGATGAAAGCAAAGGAGTTGCTAGTAGAGTTGGATCCCTCAAATATCTATTATCACTGGGAGATTTTGTACATAAAACATTTAAGCTCCACTCTAGATTGGAAGGGCTTAAAGATGAACTCTGGAGGAATAGAGGCTACGACTTAA	MVARKDLRFQTPSFLVVFRCSHETQPPLALLLQNRPVLRLHLASLQLLVQHQNKLDGRMKAKELLVELDPSNIYYHWEILYIKHLSSTLDWKGLKMNSGGIEATT	lcl|GPHN_26:441-758_ORF2_GPHN_26:440:757	['GPHN_141_ORF2', 'GPHN_165_ORF2', 'GPHN_237_ORF2', 'GPHN_26_ORF2', 'GPHN_272_ORF2']
GPHN_27	ORF1	600	65.29	GPHN	E40	ATGGCGACCGAGGGA	ATGGCGACCGAGGGAATGATCCTCACCAACCACGACCATCAAATCCGTGTCGGAGTCCTCACAGTGAGTGATAGCTGCTTCAGGAATCTTGCAGAAGACCGCAGTGGGATAAATCTAAAAGATCTTGTCCAAGATCCTTCTTTGTTGGGTGGGACTATATCGGCATACAAGATAGTACCAGATGAAATAGAAGAAATCAAGGAAACACTCATAGACTGGTGTGATGAAAAGGAACTTAATTTAATATTAACAACTGGAGGAACGGGGTTTGCACCACGAGATGTCACTCCAGAGGCCACAAAAGAAGTAATAGAGCGGGAAGCGCCAGGGATGGCCCTGGCAATGCTGATGGGATCGCTCAATGTCACACCTCTGGGCATGCTCTCTAGACCAGTGTGT…	MATEGMILTNHDHQIRVGVLTVSDSCFRNLAEDRSGINLKDLVQDPSLLGGTISAYKIVPDEIEEIKETLIDWCDEKELNLILTTGGTGFAPRDVTPEATKEVIEREAPGMALAMLMGSLNVTPLGMLSRPVCGIRGKTLIINLPGSKKGSQVQSRCSSKENILRASHSAVDITKVARRHRMSPFPLTSMDKAFITVLEMTPVLGTEIINYRDGMGRVLAQDVYAKDNLPPFPASVKDGYAVRAADGPGDRFIIGESQAGEQPTQTVMPGQVMRVTTGAPIPCGADAVVQVEDTELIRESDDGTEELEVRILVQARPGQDIRPIGHDIKRGECVLAKGTHMGPSEIGLLATVGVTEVEVNKFPVVAVMSTGNELLNPEDDLLPGKIRDSNRSTLLATIQ…	lcl|GPHN_27:8-1810_ORF1_GPHN_27:7:1809	['GPHN_27_ORF1']
GPHN_28	ORF1	445	48.58	GPHN	E40	ATGGCGACCGAGGGA	ATGGCGACCGAGGGAATGATCCTCACCAACCACGACCATCAAATCCGTGTCGGAGTCCTCACAGTGAGTGATAGCTGCTTCAGGAATCTTGCAGAAGACCGCAGTGGGATAAATCTAAAAGATCTTGTCCAAGATCCTTCTTTGTTGGGTGGGACTATATCGGCATACAAGATAGTACCAGATGAAATAGAAGAAATCAAGGAAACACTCATAGACTGGTGTGATGAAAAGGAACTTAATTTAATATTAACAACTGGAGGAACGGGGTTTGCACCACGAGATGTCACTCCAGAGGCCACAAAAGAAGTAATAGAGCGGGAAGCGCCAGGGATGGCCCTGGCAATGCTGATGGGATCGCTCAATGTCACACCTCTGGGCATGCTCTCTAGACCAGTGTGT…	MATEGMILTNHDHQIRVGVLTVSDSCFRNLAEDRSGINLKDLVQDPSLLGGTISAYKIVPDEIEEIKETLIDWCDEKELNLILTTGGTGFAPRDVTPEATKEVIEREAPGMALAMLMGSLNVTPLGMLSRPVCGIRGKTLIINLPGSKKGSQECFQFILPALPHAIDLLRDAIVKVKEVHDELEDLPSPPPPLSPPPTTSPHKQTEDKGVQCEEEEEEKKDSGVASTEDSSSSHITAAALAAKIPDSIISRGVQVLPRDTASLSTTPSESPRAQATSRLSTASCPTPKDYLKQVLDIDLHAQIHFGRVFMKPGLPTTFATLDIDGVRKIIFALPGNPVSAVVTCNLFVVPALRKMQGILDPRPTIIKARLSCDVKLDPRPEYHRCILTWHHQEPLPWAQ…	lcl|GPHN_28:8-1345_ORF1_GPHN_28:7:1344	['GPHN_28_ORF1']
GPHN_29	ORF1	771	83.84	GPHN	E40	ATGGCGACCGAGGGA	ATGGCGACCGAGGGAATGATCCTCACCAACCACGACCATCAAATCCGTGTCGGAGTCCTCACAGTGAGTGATAGCTGCTTCAGGAATCTTGCAGAAGACCGCAGTGGGATAAATCTAAAAGATCTTGTCCAAGATCCTTCTTTGTTGGGTGGGACTATATCGGCATACAAGATAGTACCAGATGAAATAGAAGAAATCAAGGAAACACTCATAGACTGGTGTGATGAAAAGGAACTTAATTTAATATTAACAACTGGAGGAACGGGGTTTGCACCACGAGATGTCACTCCAGAGGCCACAAAAGAAGTAATAGAGCGGGAAGCGCCAGGGATGGCCCTGGCAATGCTGATGGGATCGCTCAATGTCACACCTCTGGGCATGCTCTCTAGACCAGTGTGT…	MATEGMILTNHDHQIRVGVLTVSDSCFRNLAEDRSGINLKDLVQDPSLLGGTISAYKIVPDEIEEIKETLIDWCDEKELNLILTTGGTGFAPRDVTPEATKEVIEREAPGMALAMLMGSLNVTPLGMLSRPVCGIRGKTLIINLPGSKKGSQECFQFILPALPHAIDLLRDAIVKVKEVHDELEDLPSPPPPLSPPPTTSPHKQTEDKGVQCEEEEEEKKDSGVASTEDSSSSHITAAALAAKIPDSIISRGVQVLPRDTASLSTTPSESPRAQATSRLSTASCPTPKARLPSCSSTYSVSELHSRLEGLKDELWRNRGYDLRVQSRCSSKENILRASHSAVDITKVARRHRMSPFPLTSMDKAFITVLEMTPVLGTEIINYRDGMGRVLAQDVYAKDN…	lcl|GPHN_29:8-2323_ORF1_GPHN_29:7:2322	['GPHN_29_ORF1']
GPHN_30	ORF1	419	45.61	GPHN	E40	ATGTCTCCTTTTCCC	ATGTCTCCTTTTCCCCTGACGTCTATGGACAAAGCCTTCATTACAGTCCTGGAGATGACTCCGGTGCTTGGTACAGAAATCATCAATTACCGAGATGGAATGGGGCGAGTCCTTGCTCAAGATGTATATGCAAAAGACAACCTACCCCCATTCCCTGCATCAGTAAAAGATGGCTATGCTGTTCGAGCTGCTGATGGTCCAGGGGATCGTTTCATCATTGGGGAATCCCAAGCTGGTGAGCAGCCAACTCAGACAGTAATGCCAGGACAAGTGATGCGGGTTACAACAGGTGCTCCAATCCCCTGCGGTGCTGATGCAGTAGTGCAAGTTGAAGATACTGAACTCATCAGGGAATCAGATGATGGTACTGAAGAACTTGAAGTACGAATTCTGGTGCAA…	MSPFPLTSMDKAFITVLEMTPVLGTEIINYRDGMGRVLAQDVYAKDNLPPFPASVKDGYAVRAADGPGDRFIIGESQAGEQPTQTVMPGQVMRVTTGAPIPCGADAVVQVEDTELIRESDDGTEELEVRILVQARPGQDIRPIGHDIKRGECVLAKGTHMGPSEIGLLATVGVTEVEVNKFPVVAVMSTGNELLNPEDDLLPGKIRDSNRSTLLATIQEHGYPTINLGIVGDNPDDLLNALNEGISRADVIITSGGVSMGEKDYLKQVLDIDLHAQIHFGRVFMKPGLPTTFATLDIDGVRKIIFALPGNPVSAVVTCNLFVVPALRKMQGILDPRPTIIKARLSCDVKLDPRPEYHRCILTWHHQEPLPWAQSTGNQMSSRLMSMRSANGLLMLPPKT…	lcl|GPHN_30:346-1605_ORF1_GPHN_30:345:1604	['GPHN_110_ORF1', 'GPHN_15_ORF1', 'GPHN_173_ORF1', 'GPHN_192_ORF2', 'GPHN_209_ORF3', 'GPHN_227_ORF2', 'GPHN_228_ORF2', 'GPHN_257_ORF1', 'GPHN_264_ORF2', 'GPHN_265_ORF2', 'GPHN_268_ORF2', 'GPHN_30_ORF1', 'GPHN_36_ORF1', 'GPHN_52_ORF1', 'GPHN_80_ORF2']
	ORF2	102	11.2	GPHN	PTC	ATGGCGACCGAGGGA	ATGGCGACCGAGGGAATGATCCTCACCAACCACGACCATCAAATCCGTGTCGGAGTCCTCACAGTGAGTGATAGCTGCTTCAGGAATCTTGCAGAAGACCGCAGTGGGATAAATCTAAAAGATCTTGTCCAAGATCCTTCTTTGTTGGGTGGGACTATATCGGCATACAAGATAGTACCAGATGAAATAGAAGAAATCAAGGAAACACTCATAGACTGGTGTGATGAAAAGGAACTTAATTTAATATTAACAACTGGAGGAACGGGGTTTGCACCACGAGATGTCACTCCAGAGGTCACAGTGCTGTAG	MATEGMILTNHDHQIRVGVLTVSDSCFRNLAEDRSGINLKDLVQDPSLLGGTISAYKIVPDEIEEIKETLIDWCDEKELNLILTTGGTGFAPRDVTPEVTVL	lcl|GPHN_30:8-316_ORF2_GPHN_30:7:315	['GPHN_30_ORF2']
GPHN_31	ORF1	666	72.56	GPHN	E40	ATGGCGACCGAGGGA	ATGGCGACCGAGGGAATGATCCTCACCAACCACGACCATCAAATCCGTGTCGGAGTCCTCACAGTGAGTGATAGCTGCTTCAGGAATCTTGCAGAAGACCGCAGTGGGATAAATCTAAAAGATCTTGTCCAAGATCCTTCTTTGTTGGGTGGGACTATATCGGCATACAAGATAGTACCAGATGAAATAGAAGAAATCAAGGAAACACTCATAGACTGGTGTGATGAAAAGGAACTTAATTTAATATTAACAACTGGAGGAACGGGGTTTGCACCACGAGATGTCACTCCAGAGGCCACAAAAGAAGTAATAGAGCGGGAAGCGCCAGGGATGGCCCTGGCAATGCTGATGGGATCGCTCAATGTCACACCTCTGGGCATGCTCTCTAGACCAGTGTGT…	MATEGMILTNHDHQIRVGVLTVSDSCFRNLAEDRSGINLKDLVQDPSLLGGTISAYKIVPDEIEEIKETLIDWCDEKELNLILTTGGTGFAPRDVTPEATKEVIEREAPGMALAMLMGSLNVTPLGMLSRPVCGIRGKTLIINLPGSKKGSQIPDSIISRGVQVLPRDTASLSTTPSESPRAQATSRLSTASCPTPKLHSRLEGLKDELWRNRGYDLRVQSRCSSKENILRASHSAVDITKVARRHRMSPFPLTSMDKAFITVLEMTPVLGTEIINYRDGMGRVLAQDVYAKDNLPPFPASVKDGYAVRAADGPGDRFIIGESQAGEQPTQTVMPGQVMRVTTGAPIPCGADAVVQVEDTELIRESDDGTEELEVRILVQARPGQDIRPIGHDIKRGEC…	lcl|GPHN_31:8-2008_ORF1_GPHN_31:7:2007	['GPHN_31_ORF1']
GPHN_32	ORF1	628	67.57	GPHN	PTC	ATGGCGACCGAGGGA	ATGGCGACCGAGGGAATGATCCTCACCAACCACGACCATCAAATCCGTGTCGGAGTCCTCACAGTGAGTGATAGCTGCTTCAGGAATCTTGCAGAAGACCGCAGTGGGATAAATCTAAAAGATCTTGTCCAAGATCCTTCTTTGTTGGGTGGGACTATATCGGCATACAAGATAGTACCAGATGAAATAGAAGAAATCAAGGAAACACTCATAGACTGGTGTGATGAAAAGGAACTTAATTTAATATTAACAACTGGAGGAACGGGGTTTGCACCACGAGATGTCACTCCAGAGGCCACAAAAGAAGTAATAGAGCGGGAAGCGCCAGGGATGGCCCTGGCAATGCTGATGGGATCGCTCAATGTCACACCTCTGGGCATGCTCTCTAGACCAGTGTGT…	MATEGMILTNHDHQIRVGVLTVSDSCFRNLAEDRSGINLKDLVQDPSLLGGTISAYKIVPDEIEEIKETLIDWCDEKELNLILTTGGTGFAPRDVTPEATKEVIEREAPGMALAMLMGSLNVTPLGMLSRPVCGIRGKTLIINLPGSKKGSQECFQFILPALPHAIDLLRDAIVKVKEVHDELEDLPSPPPPLSPPPTTSPHKQTEDKGVQCEEEEEEKKDSGVASTEDSSSSHITAAALAAKIPDSIISRGVQVLPRDTASLSTTPSESPRAQATSRLSTASCPTPKVQSRCSSKENILRASHSAVDITKVARRHRMSPFPLTSMDKAFITVLEMTPVLGTEIINYRDGMGRVLAQDVYAKDNLPPFPASVKDGYAVRAADGPGDRFIIGESQAGEQP…	lcl|GPHN_32:8-1894_ORF1_GPHN_32:7:1893	['GPHN_32_ORF1']
GPHN_33	ORF1	626	67.71	GPHN	E40	ATGGCCCTGGCAATG	ATGGCCCTGGCAATGCTGATGGGATCGCTCAATGTCACACCTCTGGGCATGCTCTCTAGACCAGTGTGTGGAATAAGGGGGAAAACTCTGATAATTAACCTACCTGGTAGCAAGAAAGGATCTCAGGAATGCTTTCAGTTCATACTGCCAGCTCTACCTCATGCCATTGACCTTTTACGTGATGCCATTGTAAAAGTAAAGGAGGTGCATGATGAACTTGAAGATTTACCTTCCCCACCACCTCCTCTCTCTCCACCTCCTACAACTAGCCCACATAAACAGACAGAAGACAAAGGAGTTCAGTGTGAAGAAGAGGAAGAAGAAAAGAAAGACAGTGGTGTAGCTTCAACAGAAGATAGTTCCTCATCACATATAACTGCAGCAGCTCTTGCTGCAAAG…	MALAMLMGSLNVTPLGMLSRPVCGIRGKTLIINLPGSKKGSQECFQFILPALPHAIDLLRDAIVKVKEVHDELEDLPSPPPPLSPPPTTSPHKQTEDKGVQCEEEEEEKKDSGVASTEDSSSSHITAAALAAKIPDSIISRGVQVLPRDTASLSTTPSESPRAQATSRLSTASCPTPKVQSRCSSKENILRASHSAVDITKVARRHRMSPFPLTSMDKAFITVLEMTPVLGTEIINYRDGMGRVLAQDVYAKDNLPPFPASVKDGYAVRAADGPGDRFIIGESQAGEQPTQTVMPGQVMRVTTGAPIPCGADAVVQVEDTELIRESDDGTEELEVRILVQARPGQDIRPIGHDIKRGECVLAKGTHMGPSEIGLLATVGVTEVEVNKFPVVAVMSTGNE…	lcl|GPHN_33:201-2081_ORF1_GPHN_33:200:2080	['GPHN_108_ORF1', 'GPHN_248_ORF1', 'GPHN_33_ORF1', 'GPHN_37_ORF1']
GPHN_34	ORF1	470	51.33	GPHN	E40	ATGGCGACCGAGGGA	ATGGCGACCGAGGGAATGATCCTCACCAACCACGACCATCAAATCCGTGTCGGAGTCCTCACAGTGAGTGATAGCTGCTTCAGGAATCTTGCAGAAGACCGCAGTGGGATAAATCTAAAAGATCTTGTCCAAGATCCTTCTTTGTTGGGTGGGACTATATCGGCATACAAGATAGTACCAGATGAAATAGAAGAAATCAAGGAAACACTCATAGACTGGTGTGATGAAAAGGAACTTAATTTAATATTAACAACTGGAGGAACGGGGTTTGCACCACGAGATGTCACTCCAGAGGCCACAAAAGAAGTAATAGAGCGGGAAGCGCCAGGGATGGCCCTGGCAATGCTGATGGGATCGCTCAATGTCACACCTCTGGGCATGCTCTCTAGACCAGTGTGT…	MATEGMILTNHDHQIRVGVLTVSDSCFRNLAEDRSGINLKDLVQDPSLLGGTISAYKIVPDEIEEIKETLIDWCDEKELNLILTTGGTGFAPRDVTPEATKEVIEREAPGMALAMLMGSLNVTPLGMLSRPVCGIRGKTLIINLPGSKKGSQECFQFILPALPHAIDLLRDAIVKVKEVHDELEDLPSPPPPLSPPPTTSPHKQTEDKGVQCEEEEEEKKDSGVASTEDSSSSHITAAALAAKLLNPEDDLLPGKIRDSNRSTLLATIQEHGYPTINLGIVGDNPDDLLNALNEGISRADVIITSGGVSMGEKDYLKQVLDIDLHAQIHFGRVFMKPGLPTTFATLDIDGVRKIIFALPGNPVSAVVTCNLFVVPALRKMQGILDPRPTIIKARLSCDV…	lcl|GPHN_34:8-1420_ORF1_GPHN_34:7:1419	['GPHN_34_ORF1']
GPHN_35	ORF1	559	61.12	GPHN	E40	ATGGCGACCGAGGGA	ATGGCGACCGAGGGAATGATCCTCACCAACCACGACCATCAAATCCGTGTCGGAGTCCTCACAGTGAGTGATAGCTGCTTCAGGAATCTTGCAGAAGACCGCAGTGGGATAAATCTAAAAGATCTTGTCCAAGATCCTTCTTTGTTGGGTGGGACTATATCGGCATACAAGATAGTACCAGATGAAATAGAAGAAATCAAGGAAACACTCATAGACTGGTGTGATGAAAAGGAACTTAATTTAATATTAACAACTGGAGGAACGGGGTTTGCACCACGAGATGTCACTCCAGAGAAATTCCCAACATTCCCATTTTGTGGGCTCCAGAAAGGGGTCCAGTCCAGGTGCAGCAGCAAGGAGAACATTCTAAGAGCCAGTCACAGTGCTGTAGATATCACC…	MATEGMILTNHDHQIRVGVLTVSDSCFRNLAEDRSGINLKDLVQDPSLLGGTISAYKIVPDEIEEIKETLIDWCDEKELNLILTTGGTGFAPRDVTPEKFPTFPFCGLQKGVQSRCSSKENILRASHSAVDITKVARRHRMSPFPLTSMDKAFITVLEMTPVLGTEIINYRDGMGRVLAQDVYAKDNLPPFPASVKDGYAVRAADGPGDRFIIGESQAGEQPTQTVMPGQVMRVTTGAPIPCGADAVVQVEDTELIRESDDGTEELEVRILVQARPGQDIRPIGHDIKRGECVLAKGTHMGPSEIGLLATVGVTEVEVNKFPVVAVMSTGNELLNPEDDLLPGKIRDSNRSTLLATIQEHGYPTINLGIVGDNPDDLLNALNEGISRADVIITSGGVSM…	lcl|GPHN_35:8-1687_ORF1_GPHN_35:7:1686	['GPHN_35_ORF1']
GPHN_36	ORF1	419	45.61	GPHN	E40	ATGTCTCCTTTTCCC	ATGTCTCCTTTTCCCCTGACGTCTATGGACAAAGCCTTCATTACAGTCCTGGAGATGACTCCGGTGCTTGGTACAGAAATCATCAATTACCGAGATGGAATGGGGCGAGTCCTTGCTCAAGATGTATATGCAAAAGACAACCTACCCCCATTCCCTGCATCAGTAAAAGATGGCTATGCTGTTCGAGCTGCTGATGGTCCAGGGGATCGTTTCATCATTGGGGAATCCCAAGCTGGTGAGCAGCCAACTCAGACAGTAATGCCAGGACAAGTGATGCGGGTTACAACAGGTGCTCCAATCCCCTGCGGTGCTGATGCAGTAGTGCAAGTTGAAGATACTGAACTCATCAGGGAATCAGATGATGGTACTGAAGAACTTGAAGTACGAATTCTGGTGCAA…	MSPFPLTSMDKAFITVLEMTPVLGTEIINYRDGMGRVLAQDVYAKDNLPPFPASVKDGYAVRAADGPGDRFIIGESQAGEQPTQTVMPGQVMRVTTGAPIPCGADAVVQVEDTELIRESDDGTEELEVRILVQARPGQDIRPIGHDIKRGECVLAKGTHMGPSEIGLLATVGVTEVEVNKFPVVAVMSTGNELLNPEDDLLPGKIRDSNRSTLLATIQEHGYPTINLGIVGDNPDDLLNALNEGISRADVIITSGGVSMGEKDYLKQVLDIDLHAQIHFGRVFMKPGLPTTFATLDIDGVRKIIFALPGNPVSAVVTCNLFVVPALRKMQGILDPRPTIIKARLSCDVKLDPRPEYHRCILTWHHQEPLPWAQSTGNQMSSRLMSMRSANGLLMLPPKT…	lcl|GPHN_36:424-1683_ORF1_GPHN_36:423:1682	['GPHN_110_ORF1', 'GPHN_15_ORF1', 'GPHN_173_ORF1', 'GPHN_192_ORF2', 'GPHN_209_ORF3', 'GPHN_227_ORF2', 'GPHN_228_ORF2', 'GPHN_257_ORF1', 'GPHN_264_ORF2', 'GPHN_265_ORF2', 'GPHN_268_ORF2', 'GPHN_30_ORF1', 'GPHN_36_ORF1', 'GPHN_52_ORF1', 'GPHN_80_ORF2']
GPHN_37	ORF1	626	67.71	GPHN	E40	ATGGCCCTGGCAATG	ATGGCCCTGGCAATGCTGATGGGATCGCTCAATGTCACACCTCTGGGCATGCTCTCTAGACCAGTGTGTGGAATAAGGGGGAAAACTCTGATAATTAACCTACCTGGTAGCAAGAAAGGATCTCAGGAATGCTTTCAGTTCATACTGCCAGCTCTACCTCATGCCATTGACCTTTTACGTGATGCCATTGTAAAAGTAAAGGAGGTGCATGATGAACTTGAAGATTTACCTTCCCCACCACCTCCTCTCTCTCCACCTCCTACAACTAGCCCACATAAACAGACAGAAGACAAAGGAGTTCAGTGTGAAGAAGAGGAAGAAGAAAAGAAAGACAGTGGTGTAGCTTCAACAGAAGATAGTTCCTCATCACATATAACTGCAGCAGCTCTTGCTGCAAAG…	MALAMLMGSLNVTPLGMLSRPVCGIRGKTLIINLPGSKKGSQECFQFILPALPHAIDLLRDAIVKVKEVHDELEDLPSPPPPLSPPPTTSPHKQTEDKGVQCEEEEEEKKDSGVASTEDSSSSHITAAALAAKIPDSIISRGVQVLPRDTASLSTTPSESPRAQATSRLSTASCPTPKVQSRCSSKENILRASHSAVDITKVARRHRMSPFPLTSMDKAFITVLEMTPVLGTEIINYRDGMGRVLAQDVYAKDNLPPFPASVKDGYAVRAADGPGDRFIIGESQAGEQPTQTVMPGQVMRVTTGAPIPCGADAVVQVEDTELIRESDDGTEELEVRILVQARPGQDIRPIGHDIKRGECVLAKGTHMGPSEIGLLATVGVTEVEVNKFPVVAVMSTGNE…	lcl|GPHN_37:108-1988_ORF1_GPHN_37:107:1987	['GPHN_108_ORF1', 'GPHN_248_ORF1', 'GPHN_33_ORF1', 'GPHN_37_ORF1']
GPHN_38	ORF1	785	85.13	GPHN	E40	ATGGCGACCGAGGGA	ATGGCGACCGAGGGAATGATCCTCACCAACCACGACCATCAAATCCGTGTCGGAGTCCTCACAGTGAGTGATAGCTGCTTCAGGAATCTTGCAGAAGACCGCAGTGGGATAAATCTAAAAGATCTTGTCCAAGATCCTTCTTTGTTGGGTGGGACTATATCGGCATACAAGATAGTACCAGATGAAATAGAAGAAATCAAGGAAACACTCATAGACTGGTGTGATGAAAAGGAACTTAATTTAATATTAACAACTGGAGGAACGGGGTTTGCACCACGAGATGTCACTCCAGAGAAATTCCCAACATTCCCATTTTGTGGGCTCCAGAAAGGGGCCACAAAAGAAGTAATAGAGCGGGAAGCGCCAGGGATGGCCCTGGCAATGCTGATGGGATCGCTC…	MATEGMILTNHDHQIRVGVLTVSDSCFRNLAEDRSGINLKDLVQDPSLLGGTISAYKIVPDEIEEIKETLIDWCDEKELNLILTTGGTGFAPRDVTPEKFPTFPFCGLQKGATKEVIEREAPGMALAMLMGSLNVTPLGMLSRPVCGIRGKTLIINLPGSKKGSQECFQFILPALPHAIDLLRDAIVKVKEVHDELEDLPSPPPPLSPPPTTSPHKQTEDKGVQCEEEEEEKKDSGVASTEDSSSSHITAAALAAKKHPFYTSPALFMANHGQPIPGLISYSHHATGSADKRIPDSIISRGVQVLPRDTASLSTTPSESPRAQATSRLSTASCPTPKVQSRCSSKENILRASHSAVDITKVARRHRMSPFPLTSMDKAFITVLEMTPVLGTEIINYRDG…	lcl|GPHN_38:8-2365_ORF1_GPHN_38:7:2364	['GPHN_38_ORF1']
	ORF2	100	11.18	unknown	PTC	CTGCAGCAGCTCTTG	CTGCAGCAGCTCTTGCTGCAAAGAAGCATCCATTCTACACCAGTCCTGCTCTTTTCATGGCAAATCATGGGCAGCCCATCCCTGGTCTCATCAGTTATTCCCATCATGCAACAGGCAGTGCAGATAAACGGATTCCAGACTCCATCATTTCTCGTGGTGTTCAGGTGCTCCCACGAGACACAGCCTCCCTTAGCACTACTCCTTCAGAATCGCCCCGTGCTCAGGCTACATCTCGCCTCTCTACAGCTTCTTGTCCAACACCAAAAGTCCAGTCCAGGTGCAGCAGCAAGGAGAACATTCTAA	MQQLLLQRSIHSTPVLLFSWQIMGSPSLVSSVIPIMQQAVQINGFQTPSFLVVFRCSHETQPPLALLLQNRPVLRLHLASLQLLVQHQKSSPGAAARRTF	lcl|GPHN_38:753-1055_ORF2_GPHN_38:752:1054	['GPHN_105_ORF2', 'GPHN_116_ORF1', 'GPHN_119_ORF1', 'GPHN_143_ORF2', 'GPHN_144_ORF2', 'GPHN_164_ORF1', 'GPHN_171_ORF2', 'GPHN_185_ORF2', 'GPHN_190_ORF2', 'GPHN_241_ORF2', 'GPHN_254_ORF2', 'GPHN_38_ORF2', 'GPHN_4_ORF2', 'GPHN_51_ORF2', 'GPHN_57_ORF2', 'GPHN_77_ORF2', 'GPHN_95_ORF1']
GPHN_39	ORF1	659	71.42	GPHN	E40	ATGGCGACCGAGGGA	ATGGCGACCGAGGGAATGATCCTCACCAACCACGACCATCAAATCCGTGTCGGAGTCCTCACAGTGAGTGATAGCTGCTTCAGGAATCTTGCAGAAGACCGCAGTGGGATAAATCTAAAAGATCTTGTCCAAGATCCTTCTTTGTTGGGTGGGACTATATCGGCATACAAGATAGTACCAGATGAAATAGAAGAAATCAAGGAAACACTCATAGACTGGTGTGATGAAAAGGAACTTAATTTAATATTAACAACTGGAGGAACGGGGTTTGCACCACGAGATGTCACTCCAGAGGCCACAAAAGAAGTAATAGAGCGGGAAGCGCCAGGGATGGCCCTGGCAATGCTGATGGGATCGCTCAATGTCACACCTCTGGGCATGCTCTCTAGACCAGTGTGT…	MATEGMILTNHDHQIRVGVLTVSDSCFRNLAEDRSGINLKDLVQDPSLLGGTISAYKIVPDEIEEIKETLIDWCDEKELNLILTTGGTGFAPRDVTPEATKEVIEREAPGMALAMLMGSLNVTPLGMLSRPVCGIRGKTLIINLPGSKKGSQIPDSIISRGVQVLPRDTASLSTTPSESPRAQATSRLSTASCPTPKARLPSCSSTYSVSEVQSRCSSKENILRASHSAVDITKVARRHRMSPFPLTSMDKAFITVLEMTPVLGTEIINYRDGMGRVLAQDVYAKDNLPPFPASVKDGYAVRAADGPGDRFIIGESQAGEQPTQTVMPGQVMRVTTGAPIPCGADAVVQVEDTELIRESDDGTEELEVRILVQARPGQDIRPIGHDIKRGECVLAKGTH…	lcl|GPHN_39:8-1987_ORF1_GPHN_39:7:1986	['GPHN_39_ORF1']
GPHN_40	ORF1	506	54.92	GPHN	E40	CTGATAATTAACCTA	CTGATAATTAACCTACCTGGTAGCAAGAAAGGATCTCAGATTCCAGACTCCATCATTTCTCGTGGTGTTCAGGTGCTCCCACGAGACACAGCCTCCCTTAGCACTACTCCTTCAGAATCGCCCCGTGCTCAGGCTACATCTCGCCTCTCTACAGCTTCTTGTCCAACACCAAAAGTCCAGTCCAGGTGCAGCAGCAAGGAGAACATTCTAAGAGCCAGTCACAGTGCTGTAGATATCACCAAGGTGGCTAGAAGACATCGCATGTCTCCTTTTCCCCTGACGTCTATGGACAAAGCCTTCATTACAGTCCTGGAGATGACTCCGGTGCTTGGTACAGAAATCATCAATTACCGAGATGGAATGGGGCGAGTCCTTGCTCAAGATGTATATGCAAAAGAC…	MIINLPGSKKGSQIPDSIISRGVQVLPRDTASLSTTPSESPRAQATSRLSTASCPTPKVQSRCSSKENILRASHSAVDITKVARRHRMSPFPLTSMDKAFITVLEMTPVLGTEIINYRDGMGRVLAQDVYAKDNLPPFPASVKDGYAVRAADGPGDRFIIGESQAGEQPTQTVMPGQVMRVTTGAPIPCGADAVVQVEDTELIRESDDGTEELEVRILVQARPGQDIRPIGHDIKRGECVLAKGTHMGPSEIGLLATVGVTEVEVNKFPVVAVMSTGNELLNPEDDLLPGKIRDSNRSTLLATIQEHGYPTINLGIVGDNPDDLLNALNEGISRADVIITSGGVSMGEKDYLKQVLDIDLHAQIHFGRVFMKPGLPTTFATLDIDGVRKIIFALPGNPV…	lcl|GPHN_40:100-1620_ORF1_GPHN_40:99:1619	['GPHN_40_ORF1']
GPHN_41	ORF1	770	83.82	GPHN	E40	ATGGCGACCGAGGGA	ATGGCGACCGAGGGAATGATCCTCACCAACCACGACCATCAAATCCGTGTCGGAGTCCTCACAGTGAGTGATAGCTGCTTCAGGAATCTTGCAGAAGACCGCAGTGGGATAAATCTAAAAGATCTTGTCCAAGATCCTTCTTTGTTGGGTGGGACTATATCGGCATACAAGATAGTACCAGATGAAATAGAAGAAATCAAGGAAACACTCATAGACTGGTGTGATGAAAAGGAACTTAATTTAATATTAACAACTGGAGGAACGGGGTTTGCACCACGAGATGTCACTCCAGAGAAATTCCCAACATTCCCATTTTGTGGGCTCCAGAAAGGGGCCACAAAAGAAGTAATAGAGCGGGAAGCGCCAGGGATGGCCCTGGCAATGCTGATGGGATCGCTC…	MATEGMILTNHDHQIRVGVLTVSDSCFRNLAEDRSGINLKDLVQDPSLLGGTISAYKIVPDEIEEIKETLIDWCDEKELNLILTTGGTGFAPRDVTPEKFPTFPFCGLQKGATKEVIEREAPGMALAMLMGSLNVTPLGMLSRPVCGIRGKTLIINLPGSKKGSQECFQFILPALPHAIDLLRDAIVKVKEVHDELEDLPSPPPPLSPPPTTSPHKQTEDKGVQCEEEEEEKKDSGVASTEDSSSSHITAAALAAKIPDSIISRGVQVLPRDTASLSTTPSESPRAQATSRLSTASCPTPKLHSRLEGLKDELWRNRGYDLRVQSRCSSKENILRASHSAVDITKVARRHRMSPFPLTSMDKAFITVLEMTPVLGTEIINYRDGMGRVLAQDVYAKDNL…	lcl|GPHN_41:8-2320_ORF1_GPHN_41:7:2319	['GPHN_41_ORF1']
GPHN_42	ORF1	669	72.16	GPHN	E40	ATGGCGACCGAGGGA	ATGGCGACCGAGGGAATGATCCTCACCAACCACGACCATCAAATCCGTGTCGGAGTCCTCACAGTGAGTGATAGCTGCTTCAGGAATCTTGCAGAAGACCGCAGTGGGATAAATCTAAAAGATCTTGTCCAAGATCCTTCTTTGTTGGGTGGGACTATATCGGCATACAAGATAGTACCAGATGAAATAGAAGAAATCAAGGAAACACTCATAGACTGGTGTGATGAAAAGGAACTTAATTTAATATTAACAACTGGAGGAACGGGGTTTGCACCACGAGATGTCACTCCAGAGGCCACAAAAGAAGTAATAGAGCGGGAAGCGCCAGGGATGGCCCTGGCAATGCTGATGGGATCGCTCAATGTCACACCTCTGGGCATGCTCTCTAGACCAGTGTGT…	MATEGMILTNHDHQIRVGVLTVSDSCFRNLAEDRSGINLKDLVQDPSLLGGTISAYKIVPDEIEEIKETLIDWCDEKELNLILTTGGTGFAPRDVTPEATKEVIEREAPGMALAMLMGSLNVTPLGMLSRPVCGIRGKTLIINLPGSKKGSQECFQFILPALPHAIDLLRDAIVKVKEVHDELEDLPSPPPPLSPPPTTSPHKQTEDKGVQCEEEEEEKKDSGVASTEDSSSSHITAAALAAKIPDSIISRGVQVLPRDTASLSTTPSESPRAQATSRLSTASCPTPKVQSRCSSKENILRASHSAVDITKVARRHRMSPFPLTSMDKAFITVLEMTPVLGTEIINYRDGMGRVLAQDVYAKDNLPPFPASVKDGYAVRAADGPGDRFIIGESQAGEQP…	lcl|GPHN_42:8-2017_ORF1_GPHN_42:7:2016	['GPHN_42_ORF1']
GPHN_43	ORF1	641	68.88	GPHN	PTC	ATGGCGACCGAGGGA	ATGGCGACCGAGGGAATGATCCTCACCAACCACGACCATCAAATCCGTGTCGGAGTCCTCACAGTGAGTGATAGCTGCTTCAGGAATCTTGCAGAAGACCGCAGTGGGATAAATCTAAAAGATCTTGTCCAAGATCCTTCTTTGTTGGGTGGGACTATATCGGCATACAAGATAGTACCAGATGAAATAGAAGAAATCAAGGAAACACTCATAGACTGGTGTGATGAAAAGGAACTTAATTTAATATTAACAACTGGAGGAACGGGGTTTGCACCACGAGATGTCACTCCAGAGGCCACAAAAGAAGTAATAGAGCGGGAAGCGCCAGGGATGGCCCTGGCAATGCTGATGGGATCGCTCAATGTCACACCTCTGGGCATGCTCTCTAGACCAGTGTGT…	MATEGMILTNHDHQIRVGVLTVSDSCFRNLAEDRSGINLKDLVQDPSLLGGTISAYKIVPDEIEEIKETLIDWCDEKELNLILTTGGTGFAPRDVTPEATKEVIEREAPGMALAMLMGSLNVTPLGMLSRPVCGIRGKTLIINLPGSKKGSQECFQFILPALPHAIDLLRDAIVKVKEVHDELEDLPSPPPPLSPPPTTSPHKQTEDKGVQCEEEEEEKKDSGVASTEDSSSSHITAAALAAKIPDSIISRGVQVLPRDTASLSTTPSESPRAQATSRLSTASCPTPKVQSRCSSKENILRASHSAVDITKVARRHRMSPFPLTSMDKAFITVLEMTPVLGTEIINYRDGMGRVLAQDVYAKDNLPPFPASVKDGYAVRAADGPGDRFIIGESQAGEQP…	lcl|GPHN_43:8-1933_ORF1_GPHN_43:7:1932	['GPHN_43_ORF1']
GPHN_44	ORF1	529	57.46	GPHN	E40	ATGGCGACCGAGGGA	ATGGCGACCGAGGGAATGATCCTCACCAACCACGACCATCAAATCCGTGTCGGAGTCCTCACAGTGAGTGATAGCTGCTTCAGGAATCTTGCAGAAGACCGCAGTGGGATAAATCTAAAAGATCTTGTCCAAGATCCTTCTTTGTTGGGTGGGACTATATCGGCATACAAGATAGTACCAGATGAAATAGAAGAAATCAAGGAAACACTCATAGACTGGTGTGATGAAAAGGAACTTAATTTAATATTAACAACTGGAGGAACGGGGTTTGCACCACGAGATGTCACTCCAGAGGCCACAAAAGAAGTAATAGAGCGGGAAGCGCCAGGGATGGCCCTGGCAATGCTGATGGGATCGCTCAATGTCACACCTCTGGGCATGCTCTCTAGACCAGTGTGT…	MATEGMILTNHDHQIRVGVLTVSDSCFRNLAEDRSGINLKDLVQDPSLLGGTISAYKIVPDEIEEIKETLIDWCDEKELNLILTTGGTGFAPRDVTPEATKEVIEREAPGMALAMLMGSLNVTPLGMLSRPVCGIRGKTLIINLPGSKKGSQECFQFILPALPHAIDLLRDAIVKVKEVHDELEDLPSPPPPLSPPPTTSPHKQTEDKGVQCEEEEEEKKDSGVASTEDSSSSHITAAALAAKIPDSIISRGVQVLPRDTASLSTTPSESPRAQATSRLSTASCPTPKARLPSCSSTYSVSELLNPEDDLLPGKIRDSNRSTLLATIQEHGYPTINLGIVGDNPDDLLNALNEGISRADVIITSGGVSMGEKDYLKQVLDIDLHAQIHFGRVFMKPGLP…	lcl|GPHN_44:8-1597_ORF1_GPHN_44:7:1596	['GPHN_44_ORF1']
GPHN_45	ORF1	546	59.67	GPHN	E40	ATGGCGACCGAGGGA	ATGGCGACCGAGGGAATGATCCTCACCAACCACGACCATCAAATCCGTGTCGGAGTCCTCACAGTGAGTGATAGCTGCTTCAGGAATCTTGCAGAAGACCGCAGTGGGATAAATCTAAAAGATCTTGTCCAAGATCCTTCTTTGTTGGGTGGGACTATATCGGCATACAAGATAGTACCAGATGAAATAGAAGAAATCAAGGAAACACTCATAGACTGGTGTGATGAAAAGGAACTTAATTTAATATTAACAACTGGAGGAACGGGGTTTGCACCACGAGATGTCACTCCAGAGGTCCAGTCCAGGTGCAGCAGCAAGGAGAACATTCTAAGAGCCAGTCACAGTGCTGTAGATATCACCAAGGTGGCTAGAAGACATCGCATGTCTCCTTTTCCCCTG…	MATEGMILTNHDHQIRVGVLTVSDSCFRNLAEDRSGINLKDLVQDPSLLGGTISAYKIVPDEIEEIKETLIDWCDEKELNLILTTGGTGFAPRDVTPEVQSRCSSKENILRASHSAVDITKVARRHRMSPFPLTSMDKAFITVLEMTPVLGTEIINYRDGMGRVLAQDVYAKDNLPPFPASVKDGYAVRAADGPGDRFIIGESQAGEQPTQTVMPGQVMRVTTGAPIPCGADAVVQVEDTELIRESDDGTEELEVRILVQARPGQDIRPIGHDIKRGECVLAKGTHMGPSEIGLLATVGVTEVEVNKFPVVAVMSTGNELLNPEDDLLPGKIRDSNRSTLLATIQEHGYPTINLGIVGDNPDDLLNALNEGISRADVIITSGGVSMGEKDYLKQVLDID…	lcl|GPHN_45:8-1648_ORF1_GPHN_45:7:1647	['GPHN_45_ORF1']
GPHN_46	ORF1	626	67.74	GPHN	E40	ATGGCGACCGAGGGA	ATGGCGACCGAGGGAATGATCCTCACCAACCACGACCATCAAATCCGTGTCGGAGTCCTCACAGTGAGTGATAGCTGCTTCAGGAATCTTGCAGAAGACCGCAGTGGGATAAATCTAAAAGATCTTGTCCAAGATCCTTCTTTGTTGGGTGGGACTATATCGGCATACAAGATAGTACCAGATGAAATAGAAGAAATCAAGGAAACACTCATAGACTGGTGTGATGAAAAGGAACTTAATTTAATATTAACAACTGGAGGAACGGGGTTTGCACCACGAGATGTCACTCCAGAGGCCACAAAAGAAGTAATAGAGCGGGAAGCGCCAGGGATGGCCCTGGCAATGCTGATGGGATCGCTCAATGTCACACCTCTGGGCATGCTCTCTAGACCAGTGTGT…	MATEGMILTNHDHQIRVGVLTVSDSCFRNLAEDRSGINLKDLVQDPSLLGGTISAYKIVPDEIEEIKETLIDWCDEKELNLILTTGGTGFAPRDVTPEATKEVIEREAPGMALAMLMGSLNVTPLGMLSRPVCGIRGKTLIINLPGSKKGSQECFQFILPALPHAIDLLRDAIVKVKEVHDELEDLPSPPPPLSPPPTTSPHKQTEDKGVQCEEEEEEKKDSGVASTEDSSSSHITAAALAAKIPDSIISRGVQVLPRDTASLSTTPSESPRAQATSRLSTASCPTPKPTQTVMPGQVMRVTTGAPIPCGADAVVQVEDTELIRESDDGTEELEVRILVQARPGQDIRPIGHDIKRGECVLAKGTHMGPSEIGLLATVGVTEVEVNKFPVVAVMSTGNE…	lcl|GPHN_46:8-1888_ORF1_GPHN_46:7:1887	['GPHN_46_ORF1']
GPHN_47	ORF1	515	56.25	GPHN	E40	ATGGCGACCGAGGGA	ATGGCGACCGAGGGAATGATCCTCACCAACCACGACCATCAAATCCGTGTCGGAGTCCTCACAGTGAGTGATAGCTGCTTCAGGAATCTTGCAGAAGACCGCAGTGGGATAAATCTAAAAGATCTTGTCCAAGATCCTTCTTTGTTGGGTGGGACTATATCGGCATACAAGATAGTACCAGATGAAATAGAAGAAATCAAGGTCCAGTCCAGGTGCAGCAGCAAGGAGAACATTCTAAGAGCCAGTCACAGTGCTGTAGATATCACCAAGGTGGCTAGAAGACATCGCATGTCTCCTTTTCCCCTGACGTCTATGGACAAAGCCTTCATTACAGTCCTGGAGATGACTCCGGTGCTTGGTACAGAAATCATCAATTACCGAGATGGAATGGGGCGAGTC…	MATEGMILTNHDHQIRVGVLTVSDSCFRNLAEDRSGINLKDLVQDPSLLGGTISAYKIVPDEIEEIKVQSRCSSKENILRASHSAVDITKVARRHRMSPFPLTSMDKAFITVLEMTPVLGTEIINYRDGMGRVLAQDVYAKDNLPPFPASVKDGYAVRAADGPGDRFIIGESQAGEQPTQTVMPGQVMRVTTGAPIPCGADAVVQVEDTELIRESDDGTEELEVRILVQARPGQDIRPIGHDIKRGECVLAKGTHMGPSEIGLLATVGVTEVEVNKFPVVAVMSTGNELLNPEDDLLPGKIRDSNRSTLLATIQEHGYPTINLGIVGDNPDDLLNALNEGISRADVIITSGGVSMGEKDYLKQVLDIDLHAQIHFGRVFMKPGLPTTFATLDIDGVRKI…	lcl|GPHN_47:8-1555_ORF1_GPHN_47:7:1554	['GPHN_47_ORF1']
GPHN_48	ORF1	803	87.54	GPHN	E40	ATGGCGACCGAGGGA	ATGGCGACCGAGGGAATGATCCTCACCAACCACGACCATCAAATCCGTGTCGGAGTCCTCACAGTGAGTGATAGCTGCTTCAGGAATCTTGCAGAAGACCGCAGTGGGATAAATCTAAAAGATCTTGTCCAAGATCCTTCTTTGTTGGGTGGGACTATATCGGCATACAAGATAGTACCAGATGAAATAGAAGAAATCAAGGAAACACTCATAGACTGGTGTGATGAAAAGGAACTTAATTTAATATTAACAACTGGAGGAACGGGGTTTGCACCACGAGATGTCACTCCAGAGAAATTCCCAACATTCCCATTTTGTGGGCTCCAGAAAGGGGCCACAAAAGAAGTAATAGAGCGGGAAGCGCCAGGGATGGCCCTGGCAATGCTGATGGGATCGCTC…	MATEGMILTNHDHQIRVGVLTVSDSCFRNLAEDRSGINLKDLVQDPSLLGGTISAYKIVPDEIEEIKETLIDWCDEKELNLILTTGGTGFAPRDVTPEKFPTFPFCGLQKGATKEVIEREAPGMALAMLMGSLNVTPLGMLSRPVCGIRGKTLIINLPGSKKGSQECFQFILPALPHAIDLLRDAIVKVKEVHDELEDLPSPPPPLSPPPTTSPHKQTEDKGVQCEEEEEEKKDSGVASTEDSSSSHITAAALAAKIPDSIISRGVQVLPRDTASLSTTPSESPRAQATSRLSTASCPTPKQIRRPDESKGVASRVGSLKYLLSLGDFVHKTFKLHSRLEGLKDELWRNRGYDLRVQSRCSSKENILRASHSAVDITKVARRHRMSPFPLTSMDKAFIT…	lcl|GPHN_48:8-2419_ORF1_GPHN_48:7:2418	['GPHN_48_ORF1']
	ORF2	105	12.21	unknown	PTC	CTGCAGCAGCTCTTG	CTGCAGCAGCTCTTGCTGCAAAGATTCCAGACTCCATCATTTCTCGTGGTGTTCAGGTGCTCCCACGAGACACAGCCTCCCTTAGCACTACTCCTTCAGAATCGCCCCGTGCTCAGGCTACATCTCGCCTCTCTACAGCTTCTTGTCCAACACCAAAACAAATTAGACGGCCGGATGAAAGCAAAGGAGTTGCTAGTAGAGTTGGATCCCTCAAATATCTATTATCACTGGGAGATTTTGTACATAAAACATTTAAGCTCCACTCTAGATTGGAAGGGCTTAAAGATGAACTCTGGAGGAATAGAGGCTACGACTTAA	MQQLLLQRFQTPSFLVVFRCSHETQPPLALLLQNRPVLRLHLASLQLLVQHQNKLDGRMKAKELLVELDPSNIYYHWEILYIKHLSSTLDWKGLKMNSGGIEATT	lcl|GPHN_48:753-1070_ORF2_GPHN_48:752:1069	['GPHN_103_ORF2', 'GPHN_12_ORF2', 'GPHN_178_ORF2', 'GPHN_180_ORF1', 'GPHN_263_ORF2', 'GPHN_273_ORF2', 'GPHN_48_ORF2']
GPHN_49	ORF1	528	57.45	GPHN	E40	ATGGCGACCGAGGGA	ATGGCGACCGAGGGAATGATCCTCACCAACCACGACCATCAAATCCGTGTCGGAGTCCTCACAGTGAGTGATAGCTGCTTCAGGAATCTTGCAGAAGACCGCAGTGGGATAAATCTAAAAGATCTTGTCCAAGATCCTTCTTTGTTGGGTGGGACTATATCGGCATACAAGATAGTACCAGATGAAATAGAAGAAATCAAGGAAACACTCATAGACTGGTGTGATGAAAAGGAACTTAATTTAATATTAACAACTGGAGGAACGGGGTTTGCACCACGAGATGTCACTCCAGAGAAATTCCCAACATTCCCATTTTGTGGGCTCCAGAAAGGGGCCACAAAAGAAGTAATAGAGCGGGAAGCGCCAGGGATGGCCCTGGCAATGCTGATGGGATCGCTC…	MATEGMILTNHDHQIRVGVLTVSDSCFRNLAEDRSGINLKDLVQDPSLLGGTISAYKIVPDEIEEIKETLIDWCDEKELNLILTTGGTGFAPRDVTPEKFPTFPFCGLQKGATKEVIEREAPGMALAMLMGSLNVTPLGMLSRPVCGIRGKTLIINLPGSKKGSQECFQFILPALPHAIDLLRDAIVKVKEVHDELEDLPSPPPPLSPPPTTSPHKQTEDKGVQCEEEEEEKKDSGVASTEDSSSSHITAAALAAKIPDSIISRGVQVLPRDTASLSTTPSESPRAQATSRLSTASCPTPKLLNPEDDLLPGKIRDSNRSTLLATIQEHGYPTINLGIVGDNPDDLLNALNEGISRADVIITSGGVSMGEKDYLKQVLDIDLHAQIHFGRVFMKPGLPT…	lcl|GPHN_49:8-1594_ORF1_GPHN_49:7:1593	['GPHN_49_ORF1']
GPHN_50	ORF1	727	79.01	GPHN	E40	ATGGCGACCGAGGGA	ATGGCGACCGAGGGAATGATCCTCACCAACCACGACCATCAAATCCGTGTCGGAGTCCTCACAGTGAGTGATAGCTGCTTCAGGAATCTTGCAGAAGACCGCAGTGGGATAAATCTAAAAGATCTTGTCCAAGATCCTTCTTTGTTGGGTGGGACTATATCGGCATACAAGATAGTACCAGATGAAATAGAAGAAATCAAGGAAACACTCATAGACTGGTGTGATGAAAAGGAACTTAATTTAATATTAACAACTGGAGGAACGGGGTTTGCACCACGAGATGTCACTCCAGAGGCCACAAAAGAAGTAATAGAGCGGGAAGCGCCAGGGATGGCCCTGGCAATGCTGATGGGATCGCTCAATGTCACACCTCTGGGCATGCTCTCTAGACCAGTGTGT…	MATEGMILTNHDHQIRVGVLTVSDSCFRNLAEDRSGINLKDLVQDPSLLGGTISAYKIVPDEIEEIKETLIDWCDEKELNLILTTGGTGFAPRDVTPEATKEVIEREAPGMALAMLMGSLNVTPLGMLSRPVCGIRGKTLIINLPGSKKGSQECFQFILPALPHAIDLLRDAIVKVKEVHDELEDLPSPPPPLSPPPTTSPHKQTEDKGVQCEEEEEEKKDSGVASTEDSSSSHITAAALAAKKHPFYTSPALFMANHGQPIPGLISYSHHATGSADKRVQSRCSSKENILRASHSAVDITKVARRHRMSPFPLTSMDKAFITVLEMTPVLGTEIINYRDGMGRVLAQDVYAKDNLPPFPASVKDGYAVRAADGPGDRFIIGESQAGEQPTQTVMPGQV…	lcl|GPHN_50:8-2191_ORF1_GPHN_50:7:2190	['GPHN_50_ORF1']
[truncated: 343 more rows]

## Sheet: Removal of duplicated ORF
		AA_length	mol_weight	Id matching	E40 splicing	TIS	CDS	AAseq	info	DUP
[truncated: 298 more rows]

## Sheet: ORF with PTC
		AA_length	mol_weight	E40 splicing	TIS	CDS	AAseq	DUP
[truncated: 298 more rows]

## Sheet: Theoretical GPHN proteome
		AA_length	mol_weight	TIS	CDS	AAseq	DUP
[truncated: 298 more rows]
