# Supplementary material for: Complex regulation of Gephyrin splicing is a determinant of inhibitory postsynaptic diversity
Source: Nat Commun. 2022 Jun 18;13:3507. doi: 10.1038/s41467-022-31264-w (PMC9206673; doi:10.1038/s41467-022-31264-w)
Supplement: Supplementary file 7 — Supplementary Table 5 [file 41467_2022_31264_MOESM7_ESM.xlsx]

## Sheet: GPHN associated peptides
sequence	Peptide	AScore	-10lgP	Mass	ppm	m/z	RT	proteins
AADGPGDR	AADGPGDR		29.57	757.335	-0.8	379.675	10.53	NP_666077.2 lcl|GPHN_4:8-2326_ORF1_GPHN_4:7:2325, XP_006515962.1, XP_006515963.1, XP_006515964.1, XP_006515965.1, XP_006515966.1, XP_006515967.1, XP_006515968.1 lcl|GPHN_38:8-2365_ORF1_GPHN_38:7:2364, XP_006515969.1 lcl|GPHN_3:8-2257_ORF1_GPHN_3:7:2256, XP_006515970.1 lcl|GPHN_1:8-2218_ORF1_GPHN_1:7:2217, XP_017170562.1, XP_017170563.1, XP_017170564.1, XP_017170565.1 lcl|GPHN_29:8-2323_ORF1_GPHN_…
AADGPGDRF	AADGPGDRF		29.37	904.404	-2.5	453.208	17.83	NP_666077.2 lcl|GPHN_4:8-2326_ORF1_GPHN_4:7:2325, XP_006515962.1, XP_006515963.1, XP_006515964.1, XP_006515965.1, XP_006515966.1, XP_006515967.1, XP_006515968.1 lcl|GPHN_38:8-2365_ORF1_GPHN_38:7:2364, XP_006515969.1 lcl|GPHN_3:8-2257_ORF1_GPHN_3:7:2256, XP_006515970.1 lcl|GPHN_1:8-2218_ORF1_GPHN_1:7:2217, XP_017170562.1, XP_017170563.1, XP_017170564.1, XP_017170565.1 lcl|GPHN_29:8-2323_ORF1_GPHN_…
AADGPGDRFI	AADGPGDRFI		29.77	1017.49	0	509.751	22.8	NP_666077.2 lcl|GPHN_4:8-2326_ORF1_GPHN_4:7:2325, XP_006515962.1, XP_006515963.1, XP_006515964.1, XP_006515965.1, XP_006515966.1, XP_006515967.1, XP_006515968.1 lcl|GPHN_38:8-2365_ORF1_GPHN_38:7:2364, XP_006515969.1 lcl|GPHN_3:8-2257_ORF1_GPHN_3:7:2256, XP_006515970.1 lcl|GPHN_1:8-2218_ORF1_GPHN_1:7:2217, XP_017170562.1, XP_017170563.1, XP_017170564.1, XP_017170565.1 lcl|GPHN_29:8-2323_ORF1_GPHN_…
AADGPGDRFII	AADGPGDRFII		34.36	1130.57	0.3	566.293	26.88	NP_666077.2 lcl|GPHN_4:8-2326_ORF1_GPHN_4:7:2325, XP_006515962.1, XP_006515963.1, XP_006515964.1, XP_006515965.1, XP_006515966.1, XP_006515967.1, XP_006515968.1 lcl|GPHN_38:8-2365_ORF1_GPHN_38:7:2364, XP_006515969.1 lcl|GPHN_3:8-2257_ORF1_GPHN_3:7:2256, XP_006515970.1 lcl|GPHN_1:8-2218_ORF1_GPHN_1:7:2217, XP_017170562.1, XP_017170563.1, XP_017170564.1, XP_017170565.1 lcl|GPHN_29:8-2323_ORF1_GPHN_…
AADGPGDRFIIG	AADGPGDRFIIG		34.31	1187.59	-0.5	594.804	25.67	NP_666077.2 lcl|GPHN_4:8-2326_ORF1_GPHN_4:7:2325, XP_006515962.1, XP_006515963.1, XP_006515964.1, XP_006515965.1, XP_006515966.1, XP_006515967.1, XP_006515968.1 lcl|GPHN_38:8-2365_ORF1_GPHN_38:7:2364, XP_006515969.1 lcl|GPHN_3:8-2257_ORF1_GPHN_3:7:2256, XP_006515970.1 lcl|GPHN_1:8-2218_ORF1_GPHN_1:7:2217, XP_017170562.1, XP_017170563.1, XP_017170564.1, XP_017170565.1 lcl|GPHN_29:8-2323_ORF1_GPHN_…
AADGPGDRFIIGE	AADGPGDRFIIGE		39.87	1316.64	1.8	659.327	26.07	NP_666077.2 lcl|GPHN_4:8-2326_ORF1_GPHN_4:7:2325, XP_006515962.1, XP_006515963.1, XP_006515964.1, XP_006515965.1, XP_006515966.1, XP_006515967.1, XP_006515968.1 lcl|GPHN_38:8-2365_ORF1_GPHN_38:7:2364, XP_006515969.1 lcl|GPHN_3:8-2257_ORF1_GPHN_3:7:2256, XP_006515970.1 lcl|GPHN_1:8-2218_ORF1_GPHN_1:7:2217, XP_017170562.1, XP_017170563.1, XP_017170564.1, XP_017170565.1 lcl|GPHN_29:8-2323_ORF1_GPHN_…
AADGPGDRFIIGES	AADGPGDRFIIGES		36.49	1403.67	0.9	702.842	25.69	NP_666077.2 lcl|GPHN_4:8-2326_ORF1_GPHN_4:7:2325, XP_006515962.1, XP_006515963.1, XP_006515964.1, XP_006515965.1, XP_006515966.1, XP_006515967.1, XP_006515968.1 lcl|GPHN_38:8-2365_ORF1_GPHN_38:7:2364, XP_006515969.1 lcl|GPHN_3:8-2257_ORF1_GPHN_3:7:2256, XP_006515970.1 lcl|GPHN_1:8-2218_ORF1_GPHN_1:7:2217, XP_017170562.1, XP_017170563.1, XP_017170564.1, XP_017170565.1 lcl|GPHN_29:8-2323_ORF1_GPHN_…
AADGPGDRFIIGESQ	AADGPGDRFIIGESQ		34.16	1531.73	-0.1	766.87	25.4	NP_666077.2 lcl|GPHN_4:8-2326_ORF1_GPHN_4:7:2325, XP_006515962.1, XP_006515963.1, XP_006515964.1, XP_006515965.1, XP_006515966.1, XP_006515967.1, XP_006515968.1 lcl|GPHN_38:8-2365_ORF1_GPHN_38:7:2364, XP_006515969.1 lcl|GPHN_3:8-2257_ORF1_GPHN_3:7:2256, XP_006515970.1 lcl|GPHN_1:8-2218_ORF1_GPHN_1:7:2217, XP_017170562.1, XP_017170563.1, XP_017170564.1, XP_017170565.1 lcl|GPHN_29:8-2323_ORF1_GPHN_…
AADGPGDRFIIGESQAGEQPT	AADGPGDRFIIGESQAGEQPT		42.53	2114.99	-1.1	1058.5	25.59	NP_666077.2 lcl|GPHN_4:8-2326_ORF1_GPHN_4:7:2325, XP_006515962.1, XP_006515963.1, XP_006515964.1, XP_006515965.1, XP_006515966.1, XP_006515967.1, XP_006515968.1 lcl|GPHN_38:8-2365_ORF1_GPHN_38:7:2364, XP_006515969.1 lcl|GPHN_3:8-2257_ORF1_GPHN_3:7:2256, XP_006515970.1 lcl|GPHN_1:8-2218_ORF1_GPHN_1:7:2217, XP_017170562.1, XP_017170563.1, XP_017170564.1, XP_017170565.1 lcl|GPHN_29:8-2323_ORF1_GPHN_…
AADGPGDRFIIGESQAGEQPTQ	AADGPGDRFIIGESQAGEQPTQ		38.34	2243.05	0.2	748.689	25.53	NP_666077.2 lcl|GPHN_4:8-2326_ORF1_GPHN_4:7:2325, XP_006515962.1, XP_006515963.1, XP_006515964.1, XP_006515965.1, XP_006515966.1, XP_006515967.1, XP_006515968.1 lcl|GPHN_38:8-2365_ORF1_GPHN_38:7:2364, XP_006515969.1 lcl|GPHN_3:8-2257_ORF1_GPHN_3:7:2256, XP_006515970.1 lcl|GPHN_1:8-2218_ORF1_GPHN_1:7:2217, XP_017170562.1, XP_017170563.1, XP_017170564.1, XP_017170565.1 lcl|GPHN_29:8-2323_ORF1_GPHN_…
AADGPGDRFIIGESQAGEQPTQTVMPGQVMR	AADGPGDRFIIGESQAGEQPTQTVMPGQVMR		62.91	3242.54	-0.5	1081.86	27.33	NP_666077.2 lcl|GPHN_4:8-2326_ORF1_GPHN_4:7:2325, XP_006515962.1, XP_006515963.1, XP_006515964.1, XP_006515965.1, XP_006515966.1, XP_006515967.1, XP_006515968.1 lcl|GPHN_38:8-2365_ORF1_GPHN_38:7:2364, XP_006515969.1 lcl|GPHN_3:8-2257_ORF1_GPHN_3:7:2256, XP_006515970.1 lcl|GPHN_1:8-2218_ORF1_GPHN_1:7:2217, XP_017170562.1, XP_017170563.1, XP_017170564.1, XP_017170565.1 lcl|GPHN_29:8-2323_ORF1_GPHN_…
AADGPGDRFIIGESQAGEQPTQTVMPGQVMR	AADGPGDRFIIGESQAGEQPTQTVM(+15.99)PGQVMR	M25:Oxidation (M):46.62	61.89	3258.54	0.9	1087.19	26.08	NP_666077.2 lcl|GPHN_4:8-2326_ORF1_GPHN_4:7:2325, XP_006515962.1, XP_006515963.1, XP_006515964.1, XP_006515965.1, XP_006515966.1, XP_006515967.1, XP_006515968.1 lcl|GPHN_38:8-2365_ORF1_GPHN_38:7:2364, XP_006515969.1 lcl|GPHN_3:8-2257_ORF1_GPHN_3:7:2256, XP_006515970.1 lcl|GPHN_1:8-2218_ORF1_GPHN_1:7:2217, XP_017170562.1, XP_017170563.1, XP_017170564.1, XP_017170565.1 lcl|GPHN_29:8-2323_ORF1_GPHN_…
AADGPGDRFIIGESQAGEQPTQTVMPGQVMR	AADGPGDRFIIGESQAGEQPTQTVM(+15.99)PGQVM(+15.99)R	M25:Oxidation (M):1000.00;M30:Oxidation (M):1000.00	61.12	3274.53	0.4	819.641	24.53	NP_666077.2 lcl|GPHN_4:8-2326_ORF1_GPHN_4:7:2325, XP_006515962.1, XP_006515963.1, XP_006515964.1, XP_006515965.1, XP_006515966.1, XP_006515967.1, XP_006515968.1 lcl|GPHN_38:8-2365_ORF1_GPHN_38:7:2364, XP_006515969.1 lcl|GPHN_3:8-2257_ORF1_GPHN_3:7:2256, XP_006515970.1 lcl|GPHN_1:8-2218_ORF1_GPHN_1:7:2217, XP_017170562.1, XP_017170563.1, XP_017170564.1, XP_017170565.1 lcl|GPHN_29:8-2323_ORF1_GPHN_…
AADGPGDRFIIGESQAGEQPTQTVMPGQVMR	AADGPGDRFIIGESQAGEQPTQTVMPGQVM(+15.99)R	M30:Oxidation (M):11.50	48.82	3258.54	0.9	1087.19	26.08	NP_666077.2 lcl|GPHN_4:8-2326_ORF1_GPHN_4:7:2325, XP_006515962.1, XP_006515963.1, XP_006515964.1, XP_006515965.1, XP_006515966.1, XP_006515967.1, XP_006515968.1 lcl|GPHN_38:8-2365_ORF1_GPHN_38:7:2364, XP_006515969.1 lcl|GPHN_3:8-2257_ORF1_GPHN_3:7:2256, XP_006515970.1 lcl|GPHN_1:8-2218_ORF1_GPHN_1:7:2217, XP_017170562.1, XP_017170563.1, XP_017170564.1, XP_017170565.1 lcl|GPHN_29:8-2323_ORF1_GPHN_…
AAKIPDSI	AAKIPDSI		30.05	813.46	1.6	407.738	21.24	XP_006515966.1, XP_006515967.1, XP_006515969.1 lcl|GPHN_3:8-2257_ORF1_GPHN_3:7:2256, XP_006515970.1 lcl|GPHN_1:8-2218_ORF1_GPHN_1:7:2217, XP_017170565.1 lcl|GPHN_29:8-2323_ORF1_GPHN_29:7:2322, XP_017170566.1, XP_017170567.1, XP_030102590.1 lcl|GPHN_41:8-2320_ORF1_GPHN_41:7:2319, XP_030102591.1 lcl|GPHN_8:8-2281_ORF1_GPHN_8:7:2280, lcl|GPHN_100:8-925_ORF2_GPHN_100:7:924 lcl|GPHN_220:8-925_ORF2_GPH…
AAKIPDSIISR	AAKIPDSIISR		33.47	1169.68	-1.2	390.899	20.59	XP_006515966.1, XP_006515967.1, XP_006515969.1 lcl|GPHN_3:8-2257_ORF1_GPHN_3:7:2256, XP_006515970.1 lcl|GPHN_1:8-2218_ORF1_GPHN_1:7:2217, XP_017170565.1 lcl|GPHN_29:8-2323_ORF1_GPHN_29:7:2322, XP_017170566.1, XP_017170567.1, XP_030102590.1 lcl|GPHN_41:8-2320_ORF1_GPHN_41:7:2319, XP_030102591.1 lcl|GPHN_8:8-2281_ORF1_GPHN_8:7:2280, lcl|GPHN_100:8-925_ORF2_GPHN_100:7:924 lcl|GPHN_220:8-925_ORF2_GPH…
AAKIPDSIISRG	AAKIPDSIISRG		32.23	1226.7	-1	409.906	20.69	XP_006515966.1, XP_006515967.1, XP_006515969.1 lcl|GPHN_3:8-2257_ORF1_GPHN_3:7:2256, XP_006515970.1 lcl|GPHN_1:8-2218_ORF1_GPHN_1:7:2217, XP_017170565.1 lcl|GPHN_29:8-2323_ORF1_GPHN_29:7:2322, XP_017170566.1, XP_017170567.1, XP_030102590.1 lcl|GPHN_41:8-2320_ORF1_GPHN_41:7:2319, XP_030102591.1 lcl|GPHN_8:8-2281_ORF1_GPHN_8:7:2280, lcl|GPHN_100:8-925_ORF2_GPHN_100:7:924 lcl|GPHN_220:8-925_ORF2_GPH…
ADAVVQVEDTE	ADAVVQVEDTE		37.05	1174.54	0.8	588.275	24.06	NP_666077.2 lcl|GPHN_4:8-2326_ORF1_GPHN_4:7:2325, XP_006515962.1, XP_006515963.1, XP_006515964.1, XP_006515965.1, XP_006515966.1, XP_006515967.1, XP_006515968.1 lcl|GPHN_38:8-2365_ORF1_GPHN_38:7:2364, XP_006515969.1 lcl|GPHN_3:8-2257_ORF1_GPHN_3:7:2256, XP_006515970.1 lcl|GPHN_1:8-2218_ORF1_GPHN_1:7:2217, XP_017170562.1, XP_017170563.1, XP_017170564.1, XP_017170565.1 lcl|GPHN_29:8-2323_ORF1_GPHN_…
ADAVVQVEDTEL	ADAVVQVEDTEL		20.47	1287.62	1.1	644.818	29.55	NP_666077.2 lcl|GPHN_4:8-2326_ORF1_GPHN_4:7:2325, XP_006515962.1, XP_006515963.1, XP_006515964.1, XP_006515965.1, XP_006515966.1, XP_006515967.1, XP_006515968.1 lcl|GPHN_38:8-2365_ORF1_GPHN_38:7:2364, XP_006515969.1 lcl|GPHN_3:8-2257_ORF1_GPHN_3:7:2256, XP_006515970.1 lcl|GPHN_1:8-2218_ORF1_GPHN_1:7:2217, XP_017170562.1, XP_017170563.1, XP_017170564.1, XP_017170565.1 lcl|GPHN_29:8-2323_ORF1_GPHN_…
ADAVVQVEDTELI	ADAVVQVEDTELI		19.83	1400.7	1.2	701.36	32.93	NP_666077.2 lcl|GPHN_4:8-2326_ORF1_GPHN_4:7:2325, XP_006515962.1, XP_006515963.1, XP_006515964.1, XP_006515965.1, XP_006515966.1, XP_006515967.1, XP_006515968.1 lcl|GPHN_38:8-2365_ORF1_GPHN_38:7:2364, XP_006515969.1 lcl|GPHN_3:8-2257_ORF1_GPHN_3:7:2256, XP_006515970.1 lcl|GPHN_1:8-2218_ORF1_GPHN_1:7:2217, XP_017170562.1, XP_017170563.1, XP_017170564.1, XP_017170565.1 lcl|GPHN_29:8-2323_ORF1_GPHN_…
ADAVVQVEDTELIR	ADAVVQVEDTELIR		38.93	1556.8	0.1	779.41	27.1	NP_666077.2 lcl|GPHN_4:8-2326_ORF1_GPHN_4:7:2325, XP_006515962.1, XP_006515963.1, XP_006515964.1, XP_006515965.1, XP_006515966.1, XP_006515967.1, XP_006515968.1 lcl|GPHN_38:8-2365_ORF1_GPHN_38:7:2364, XP_006515969.1 lcl|GPHN_3:8-2257_ORF1_GPHN_3:7:2256, XP_006515970.1 lcl|GPHN_1:8-2218_ORF1_GPHN_1:7:2217, XP_017170562.1, XP_017170563.1, XP_017170564.1, XP_017170565.1 lcl|GPHN_29:8-2323_ORF1_GPHN_…
ADAVVQVEDTELIRESDDGTEELEVR	ADAVVQVEDTELIRESDDGTEELEVR		37.58	2916.38	0.8	973.136	28.58	NP_666077.2 lcl|GPHN_4:8-2326_ORF1_GPHN_4:7:2325, XP_006515962.1, XP_006515963.1, XP_006515964.1, XP_006515965.1, XP_006515966.1, XP_006515967.1, XP_006515968.1 lcl|GPHN_38:8-2365_ORF1_GPHN_38:7:2364, XP_006515969.1 lcl|GPHN_3:8-2257_ORF1_GPHN_3:7:2256, XP_006515970.1 lcl|GPHN_1:8-2218_ORF1_GPHN_1:7:2217, XP_017170562.1, XP_017170563.1, XP_017170564.1, XP_017170565.1 lcl|GPHN_29:8-2323_ORF1_GPHN_…
ADGPGDRF	ADGPGDRF		29.26	833.367	-0.7	417.69	17.66	NP_666077.2 lcl|GPHN_4:8-2326_ORF1_GPHN_4:7:2325, XP_006515962.1, XP_006515963.1, XP_006515964.1, XP_006515965.1, XP_006515966.1, XP_006515967.1, XP_006515968.1 lcl|GPHN_38:8-2365_ORF1_GPHN_38:7:2364, XP_006515969.1 lcl|GPHN_3:8-2257_ORF1_GPHN_3:7:2256, XP_006515970.1 lcl|GPHN_1:8-2218_ORF1_GPHN_1:7:2217, XP_017170562.1, XP_017170563.1, XP_017170564.1, XP_017170565.1 lcl|GPHN_29:8-2323_ORF1_GPHN_…
ADGPGDRFI	ADGPGDRFI		27.95	946.451	-1.3	474.232	22.92	NP_666077.2 lcl|GPHN_4:8-2326_ORF1_GPHN_4:7:2325, XP_006515962.1, XP_006515963.1, XP_006515964.1, XP_006515965.1, XP_006515966.1, XP_006515967.1, XP_006515968.1 lcl|GPHN_38:8-2365_ORF1_GPHN_38:7:2364, XP_006515969.1 lcl|GPHN_3:8-2257_ORF1_GPHN_3:7:2256, XP_006515970.1 lcl|GPHN_1:8-2218_ORF1_GPHN_1:7:2217, XP_017170562.1, XP_017170563.1, XP_017170564.1, XP_017170565.1 lcl|GPHN_29:8-2323_ORF1_GPHN_…
ADGPGDRFIIGE	ADGPGDRFIIGE		36.07	1245.6	4.7	623.81	26.26	NP_666077.2 lcl|GPHN_4:8-2326_ORF1_GPHN_4:7:2325, XP_006515962.1, XP_006515963.1, XP_006515964.1, XP_006515965.1, XP_006515966.1, XP_006515967.1, XP_006515968.1 lcl|GPHN_38:8-2365_ORF1_GPHN_38:7:2364, XP_006515969.1 lcl|GPHN_3:8-2257_ORF1_GPHN_3:7:2256, XP_006515970.1 lcl|GPHN_1:8-2218_ORF1_GPHN_1:7:2217, XP_017170562.1, XP_017170563.1, XP_017170564.1, XP_017170565.1 lcl|GPHN_29:8-2323_ORF1_GPHN_…
ADGPGDRFIIGES	ADGPGDRFIIGES		40.52	1332.63	1.6	667.324	25.82	NP_666077.2 lcl|GPHN_4:8-2326_ORF1_GPHN_4:7:2325, XP_006515962.1, XP_006515963.1, XP_006515964.1, XP_006515965.1, XP_006515966.1, XP_006515967.1, XP_006515968.1 lcl|GPHN_38:8-2365_ORF1_GPHN_38:7:2364, XP_006515969.1 lcl|GPHN_3:8-2257_ORF1_GPHN_3:7:2256, XP_006515970.1 lcl|GPHN_1:8-2218_ORF1_GPHN_1:7:2217, XP_017170562.1, XP_017170563.1, XP_017170564.1, XP_017170565.1 lcl|GPHN_29:8-2323_ORF1_GPHN_…
ADGPGDRFIIGESQA	ADGPGDRFIIGESQA		37.02	1531.73	0	766.87	25.68	NP_666077.2 lcl|GPHN_4:8-2326_ORF1_GPHN_4:7:2325, XP_006515962.1, XP_006515963.1, XP_006515964.1, XP_006515965.1, XP_006515966.1, XP_006515967.1, XP_006515968.1 lcl|GPHN_38:8-2365_ORF1_GPHN_38:7:2364, XP_006515969.1 lcl|GPHN_3:8-2257_ORF1_GPHN_3:7:2256, XP_006515970.1 lcl|GPHN_1:8-2218_ORF1_GPHN_1:7:2217, XP_017170562.1, XP_017170563.1, XP_017170564.1, XP_017170565.1 lcl|GPHN_29:8-2323_ORF1_GPHN_…
ADGPGDRFIIGESQAGEQPT	ADGPGDRFIIGESQAGEQPT		41.45	2043.95	1.5	682.325	25.67	NP_666077.2 lcl|GPHN_4:8-2326_ORF1_GPHN_4:7:2325, XP_006515962.1, XP_006515963.1, XP_006515964.1, XP_006515965.1, XP_006515966.1, XP_006515967.1, XP_006515968.1 lcl|GPHN_38:8-2365_ORF1_GPHN_38:7:2364, XP_006515969.1 lcl|GPHN_3:8-2257_ORF1_GPHN_3:7:2256, XP_006515970.1 lcl|GPHN_1:8-2218_ORF1_GPHN_1:7:2217, XP_017170562.1, XP_017170563.1, XP_017170564.1, XP_017170565.1 lcl|GPHN_29:8-2323_ORF1_GPHN_…
ADGPGDRFIIGESQAGEQPTQT	ADGPGDRFIIGESQAGEQPTQT		41.36	2273.06	1	1137.54	25.7	NP_666077.2 lcl|GPHN_4:8-2326_ORF1_GPHN_4:7:2325, XP_006515962.1, XP_006515963.1, XP_006515964.1, XP_006515965.1, XP_006515966.1, XP_006515967.1, XP_006515968.1 lcl|GPHN_38:8-2365_ORF1_GPHN_38:7:2364, XP_006515969.1 lcl|GPHN_3:8-2257_ORF1_GPHN_3:7:2256, XP_006515970.1 lcl|GPHN_1:8-2218_ORF1_GPHN_1:7:2217, XP_017170562.1, XP_017170563.1, XP_017170564.1, XP_017170565.1 lcl|GPHN_29:8-2323_ORF1_GPHN_…
ADGPGDRFIIGESQAGEQPTQTV	ADGPGDRFIIGESQAGEQPTQTV		42.5	2372.12	0.1	791.716	27.03	NP_666077.2 lcl|GPHN_4:8-2326_ORF1_GPHN_4:7:2325, XP_006515962.1, XP_006515963.1, XP_006515964.1, XP_006515965.1, XP_006515966.1, XP_006515967.1, XP_006515968.1 lcl|GPHN_38:8-2365_ORF1_GPHN_38:7:2364, XP_006515969.1 lcl|GPHN_3:8-2257_ORF1_GPHN_3:7:2256, XP_006515970.1 lcl|GPHN_1:8-2218_ORF1_GPHN_1:7:2217, XP_017170562.1, XP_017170563.1, XP_017170564.1, XP_017170565.1 lcl|GPHN_29:8-2323_ORF1_GPHN_…
ADGPGDRFIIGESQAGEQPTQTVMPG	ADGPGDRFIIGESQAGEQPTQTVM(+15.99)PG	M24:Oxidation (M):1000.00	37.64	2673.23	0.7	1337.63	26.67	NP_666077.2 lcl|GPHN_4:8-2326_ORF1_GPHN_4:7:2325, XP_006515962.1, XP_006515963.1, XP_006515964.1, XP_006515965.1, XP_006515966.1, XP_006515967.1, XP_006515968.1 lcl|GPHN_38:8-2365_ORF1_GPHN_38:7:2364, XP_006515969.1 lcl|GPHN_3:8-2257_ORF1_GPHN_3:7:2256, XP_006515970.1 lcl|GPHN_1:8-2218_ORF1_GPHN_1:7:2217, XP_017170562.1, XP_017170563.1, XP_017170564.1, XP_017170565.1 lcl|GPHN_29:8-2323_ORF1_GPHN_…
ADGPGDRFIIGESQAGEQPTQTVMPG	ADGPGDRFIIGESQAGEQPTQTVMPG		20.76	2657.24	2.8	886.756	28.66	NP_666077.2 lcl|GPHN_4:8-2326_ORF1_GPHN_4:7:2325, XP_006515962.1, XP_006515963.1, XP_006515964.1, XP_006515965.1, XP_006515966.1, XP_006515967.1, XP_006515968.1 lcl|GPHN_38:8-2365_ORF1_GPHN_38:7:2364, XP_006515969.1 lcl|GPHN_3:8-2257_ORF1_GPHN_3:7:2256, XP_006515970.1 lcl|GPHN_1:8-2218_ORF1_GPHN_1:7:2217, XP_017170562.1, XP_017170563.1, XP_017170564.1, XP_017170565.1 lcl|GPHN_29:8-2323_ORF1_GPHN_…
ADGPGDRFIIGESQAGEQPTQTVMPGQV	ADGPGDRFIIGESQAGEQPTQTVM(+15.99)PGQV	M24:Oxidation (M):1000.00	41.37	2900.36	2.8	967.797	27.9	NP_666077.2 lcl|GPHN_4:8-2326_ORF1_GPHN_4:7:2325, XP_006515962.1, XP_006515963.1, XP_006515964.1, XP_006515965.1, XP_006515966.1, XP_006515967.1, XP_006515968.1 lcl|GPHN_38:8-2365_ORF1_GPHN_38:7:2364, XP_006515969.1 lcl|GPHN_3:8-2257_ORF1_GPHN_3:7:2256, XP_006515970.1 lcl|GPHN_1:8-2218_ORF1_GPHN_1:7:2217, XP_017170562.1, XP_017170563.1, XP_017170564.1, XP_017170565.1 lcl|GPHN_29:8-2323_ORF1_GPHN_…
ADGPGDRFIIGESQAGEQPTQTVMPGQV	ADGPGDRFIIGESQAGEQPTQTVMPGQV		21.37	2884.37	-0.3	962.462	29.56	NP_666077.2 lcl|GPHN_4:8-2326_ORF1_GPHN_4:7:2325, XP_006515962.1, XP_006515963.1, XP_006515964.1, XP_006515965.1, XP_006515966.1, XP_006515967.1, XP_006515968.1 lcl|GPHN_38:8-2365_ORF1_GPHN_38:7:2364, XP_006515969.1 lcl|GPHN_3:8-2257_ORF1_GPHN_3:7:2256, XP_006515970.1 lcl|GPHN_1:8-2218_ORF1_GPHN_1:7:2217, XP_017170562.1, XP_017170563.1, XP_017170564.1, XP_017170565.1 lcl|GPHN_29:8-2323_ORF1_GPHN_…
ADGPGDRFIIGESQAGEQPTQTVMPGQVM	ADGPGDRFIIGESQAGEQPTQTVM(+15.99)PGQVM(+15.99)	M24:Oxidation (M):1000.00;M29:Oxidation (M):1000.00	48.56	3047.4	2.4	1016.81	27.29	NP_666077.2 lcl|GPHN_4:8-2326_ORF1_GPHN_4:7:2325, XP_006515962.1, XP_006515963.1, XP_006515964.1, XP_006515965.1, XP_006515966.1, XP_006515967.1, XP_006515968.1 lcl|GPHN_38:8-2365_ORF1_GPHN_38:7:2364, XP_006515969.1 lcl|GPHN_3:8-2257_ORF1_GPHN_3:7:2256, XP_006515970.1 lcl|GPHN_1:8-2218_ORF1_GPHN_1:7:2217, XP_017170562.1, XP_017170563.1, XP_017170564.1, XP_017170565.1 lcl|GPHN_29:8-2323_ORF1_GPHN_…
ADGPGDRFIIGESQAGEQPTQTVMPGQVMRV	ADGPGDRFIIGESQAGEQPTQTVM(+15.99)PGQVM(+15.99)RV	M24:Oxidation (M):1000.00;M29:Oxidation (M):1000.00	61.42	3302.57	1.2	826.65	25.56	NP_666077.2 lcl|GPHN_4:8-2326_ORF1_GPHN_4:7:2325, XP_006515962.1, XP_006515963.1, XP_006515964.1, XP_006515965.1, XP_006515966.1, XP_006515967.1, XP_006515968.1 lcl|GPHN_38:8-2365_ORF1_GPHN_38:7:2364, XP_006515969.1 lcl|GPHN_3:8-2257_ORF1_GPHN_3:7:2256, XP_006515970.1 lcl|GPHN_1:8-2218_ORF1_GPHN_1:7:2217, XP_017170562.1, XP_017170563.1, XP_017170564.1, XP_017170565.1 lcl|GPHN_29:8-2323_ORF1_GPHN_…
ADKRIPDSI	ADKRIPDSI		31.06	1013.55	0.4	507.783	18.42	NP_666077.2 lcl|GPHN_4:8-2326_ORF1_GPHN_4:7:2325, XP_006515962.1, XP_006515963.1, XP_006515964.1, XP_006515965.1, XP_006515968.1 lcl|GPHN_38:8-2365_ORF1_GPHN_38:7:2364, XP_017170562.1, XP_017170563.1, XP_017170564.1, lcl|GPHN_101:8-994_ORF2_GPHN_101:7:993, lcl|GPHN_105:73-2247_ORF1_GPHN_105:72:2246, lcl|GPHN_119:441-2183_ORF3_GPHN_119:440:2182, lcl|GPHN_121:8-2368_ORF1_GPHN_121:7:2367, lcl|GPHN_1…
ADKRIPDSII	ADKRIPDSII		22.69	1126.63	0.7	564.325	22.24	NP_666077.2 lcl|GPHN_4:8-2326_ORF1_GPHN_4:7:2325, XP_006515962.1, XP_006515963.1, XP_006515964.1, XP_006515965.1, XP_006515968.1 lcl|GPHN_38:8-2365_ORF1_GPHN_38:7:2364, XP_017170562.1, XP_017170563.1, XP_017170564.1, lcl|GPHN_101:8-994_ORF2_GPHN_101:7:993, lcl|GPHN_105:73-2247_ORF1_GPHN_105:72:2246, lcl|GPHN_119:441-2183_ORF3_GPHN_119:440:2182, lcl|GPHN_121:8-2368_ORF1_GPHN_121:7:2367, lcl|GPHN_1…
ADKRIPDSIIS	ADKRIPDSIIS		25.81	1213.67	-0.5	607.84	21.26	NP_666077.2 lcl|GPHN_4:8-2326_ORF1_GPHN_4:7:2325, XP_006515962.1, XP_006515963.1, XP_006515964.1, XP_006515965.1, XP_006515968.1 lcl|GPHN_38:8-2365_ORF1_GPHN_38:7:2364, XP_017170562.1, XP_017170563.1, XP_017170564.1, lcl|GPHN_101:8-994_ORF2_GPHN_101:7:993, lcl|GPHN_105:73-2247_ORF1_GPHN_105:72:2246, lcl|GPHN_119:441-2183_ORF3_GPHN_119:440:2182, lcl|GPHN_121:8-2368_ORF1_GPHN_121:7:2367, lcl|GPHN_1…
ADKRIPDSIISR	ADKRIPDSIISR		38.93	1369.77	-0.6	457.596	18.83	NP_666077.2 lcl|GPHN_4:8-2326_ORF1_GPHN_4:7:2325, XP_006515962.1, XP_006515963.1, XP_006515964.1, XP_006515965.1, XP_006515968.1 lcl|GPHN_38:8-2365_ORF1_GPHN_38:7:2364, XP_017170562.1, XP_017170563.1, XP_017170564.1, lcl|GPHN_101:8-994_ORF2_GPHN_101:7:993, lcl|GPHN_105:73-2247_ORF1_GPHN_105:72:2246, lcl|GPHN_119:441-2183_ORF3_GPHN_119:440:2182, lcl|GPHN_121:8-2368_ORF1_GPHN_121:7:2367, lcl|GPHN_1…
ADKRIPDSIISRG	ADKRIPDSIISRG		34.64	1426.79	-0.1	476.604	19.08	NP_666077.2 lcl|GPHN_4:8-2326_ORF1_GPHN_4:7:2325, XP_006515962.1, XP_006515963.1, XP_006515964.1, XP_006515965.1, XP_006515968.1 lcl|GPHN_38:8-2365_ORF1_GPHN_38:7:2364, XP_017170562.1, XP_017170563.1, XP_017170564.1, lcl|GPHN_101:8-994_ORF2_GPHN_101:7:993, lcl|GPHN_105:73-2247_ORF1_GPHN_105:72:2246, lcl|GPHN_119:441-2183_ORF3_GPHN_119:440:2182, lcl|GPHN_121:8-2368_ORF1_GPHN_121:7:2367, lcl|GPHN_1…
ADKRIPDSIISRGVQVLPR	ADKRIPDSIISRGVQVLPR		46.78	2119.22	0.2	530.813	24.29	NP_666077.2 lcl|GPHN_4:8-2326_ORF1_GPHN_4:7:2325, XP_006515962.1, XP_006515963.1, XP_006515964.1, XP_006515965.1, XP_006515968.1 lcl|GPHN_38:8-2365_ORF1_GPHN_38:7:2364, XP_017170562.1, XP_017170563.1, XP_017170564.1, lcl|GPHN_101:8-994_ORF2_GPHN_101:7:993, lcl|GPHN_105:73-2247_ORF1_GPHN_105:72:2246, lcl|GPHN_119:441-2183_ORF3_GPHN_119:440:2182, lcl|GPHN_121:8-2368_ORF1_GPHN_121:7:2367, lcl|GPHN_1…
ADKRIPDSIISRGVQVLPRDT	ADKRIPDSIISRGVQVLPRDT		36.98	2335.3	-1.2	584.831	24.32	NP_666077.2 lcl|GPHN_4:8-2326_ORF1_GPHN_4:7:2325, XP_006515962.1, XP_006515963.1, XP_006515964.1, XP_006515965.1, XP_006515968.1 lcl|GPHN_38:8-2365_ORF1_GPHN_38:7:2364, XP_017170562.1, XP_017170563.1, XP_017170564.1, lcl|GPHN_101:8-994_ORF2_GPHN_101:7:993, lcl|GPHN_105:73-2247_ORF1_GPHN_105:72:2246, lcl|GPHN_119:441-2183_ORF3_GPHN_119:440:2182, lcl|GPHN_121:8-2368_ORF1_GPHN_121:7:2367, lcl|GPHN_1…
ADKRIPDSIISRGVQVLPRDTA	ADKRIPDSIISRGVQVLPRDTA		46.79	2406.33	-0.4	602.591	24.41	NP_666077.2 lcl|GPHN_4:8-2326_ORF1_GPHN_4:7:2325, XP_006515962.1, XP_006515963.1, XP_006515964.1, XP_006515965.1, XP_006515968.1 lcl|GPHN_38:8-2365_ORF1_GPHN_38:7:2364, XP_017170562.1, XP_017170563.1, XP_017170564.1, lcl|GPHN_101:8-994_ORF2_GPHN_101:7:993, lcl|GPHN_105:73-2247_ORF1_GPHN_105:72:2246, lcl|GPHN_119:441-2183_ORF3_GPHN_119:440:2182, lcl|GPHN_121:8-2368_ORF1_GPHN_121:7:2367, lcl|GPHN_1…
ADVIITSG	ADVIITSG		22	774.412	0.6	775.42	24.01	NP_666077.2 lcl|GPHN_4:8-2326_ORF1_GPHN_4:7:2325, XP_006515962.1, XP_006515963.1, XP_006515964.1, XP_006515965.1, XP_006515966.1, XP_006515967.1, XP_006515968.1 lcl|GPHN_38:8-2365_ORF1_GPHN_38:7:2364, XP_006515969.1 lcl|GPHN_3:8-2257_ORF1_GPHN_3:7:2256, XP_006515970.1 lcl|GPHN_1:8-2218_ORF1_GPHN_1:7:2217, XP_017170562.1, XP_017170563.1, XP_017170564.1, XP_017170565.1 lcl|GPHN_29:8-2323_ORF1_GPHN_…
ADVIITSGGVSMGEK	ADVIITSGGVSMGEK		38.88	1462.73	0.5	488.585	24.77	NP_666077.2 lcl|GPHN_4:8-2326_ORF1_GPHN_4:7:2325, XP_006515962.1, XP_006515963.1, XP_006515964.1, XP_006515965.1, XP_006515966.1, XP_006515967.1, XP_006515968.1 lcl|GPHN_38:8-2365_ORF1_GPHN_38:7:2364, XP_006515969.1 lcl|GPHN_3:8-2257_ORF1_GPHN_3:7:2256, XP_006515970.1 lcl|GPHN_1:8-2218_ORF1_GPHN_1:7:2217, XP_017170562.1, XP_017170563.1, XP_017170564.1, XP_017170565.1 lcl|GPHN_29:8-2323_ORF1_GPHN_…
ADVIITSGGVSMGEK	ADVIITSGGVSM(+15.99)GEK	M12:Oxidation (M):1000.00	36.69	1478.73	0.6	493.917	21.74	NP_666077.2 lcl|GPHN_4:8-2326_ORF1_GPHN_4:7:2325, XP_006515962.1, XP_006515963.1, XP_006515964.1, XP_006515965.1, XP_006515966.1, XP_006515967.1, XP_006515968.1 lcl|GPHN_38:8-2365_ORF1_GPHN_38:7:2364, XP_006515969.1 lcl|GPHN_3:8-2257_ORF1_GPHN_3:7:2256, XP_006515970.1 lcl|GPHN_1:8-2218_ORF1_GPHN_1:7:2217, XP_017170562.1, XP_017170563.1, XP_017170564.1, XP_017170565.1 lcl|GPHN_29:8-2323_ORF1_GPHN_…
ADVIITSGGVSMGEKDY	ADVIITSGGVSM(+15.99)GEKDY	M12:Oxidation (M):1000.00	41.03	1756.82	-2.1	586.612	24.11	NP_666077.2 lcl|GPHN_4:8-2326_ORF1_GPHN_4:7:2325, XP_006515962.1, XP_006515963.1, XP_006515964.1, XP_006515965.1, XP_006515966.1, XP_006515967.1, XP_006515968.1 lcl|GPHN_38:8-2365_ORF1_GPHN_38:7:2364, XP_006515969.1 lcl|GPHN_3:8-2257_ORF1_GPHN_3:7:2256, XP_006515970.1 lcl|GPHN_1:8-2218_ORF1_GPHN_1:7:2217, XP_017170562.1, XP_017170563.1, XP_017170564.1, XP_017170565.1 lcl|GPHN_29:8-2323_ORF1_GPHN_…
ADVIITSGGVSMGEKDY	ADVIITSGGVSMGEKDY		31.25	1740.82	-0.4	871.419	26.6	NP_666077.2 lcl|GPHN_4:8-2326_ORF1_GPHN_4:7:2325, XP_006515962.1, XP_006515963.1, XP_006515964.1, XP_006515965.1, XP_006515966.1, XP_006515967.1, XP_006515968.1 lcl|GPHN_38:8-2365_ORF1_GPHN_38:7:2364, XP_006515969.1 lcl|GPHN_3:8-2257_ORF1_GPHN_3:7:2256, XP_006515970.1 lcl|GPHN_1:8-2218_ORF1_GPHN_1:7:2217, XP_017170562.1, XP_017170563.1, XP_017170564.1, XP_017170565.1 lcl|GPHN_29:8-2323_ORF1_GPHN_…
ADVIITSGGVSMGEKDYLK	ADVIITSGGVSMGEKDYLK		45.77	1982	0	661.675	25.49	NP_666077.2 lcl|GPHN_4:8-2326_ORF1_GPHN_4:7:2325, XP_006515962.1, XP_006515963.1, XP_006515964.1, XP_006515965.1, XP_006515966.1, XP_006515967.1, XP_006515968.1 lcl|GPHN_38:8-2365_ORF1_GPHN_38:7:2364, XP_006515969.1 lcl|GPHN_3:8-2257_ORF1_GPHN_3:7:2256, XP_006515970.1 lcl|GPHN_1:8-2218_ORF1_GPHN_1:7:2217, XP_017170562.1, XP_017170563.1, XP_017170564.1, XP_017170565.1 lcl|GPHN_29:8-2323_ORF1_GPHN_…
ADVIITSGGVSMGEKDYLK	ADVIITSGGVSM(+15.99)GEKDYLK	M12:Oxidation (M):1000.00	43.87	1998	3	1000.01	23.63	NP_666077.2 lcl|GPHN_4:8-2326_ORF1_GPHN_4:7:2325, XP_006515962.1, XP_006515963.1, XP_006515964.1, XP_006515965.1, XP_006515966.1, XP_006515967.1, XP_006515968.1 lcl|GPHN_38:8-2365_ORF1_GPHN_38:7:2364, XP_006515969.1 lcl|GPHN_3:8-2257_ORF1_GPHN_3:7:2256, XP_006515970.1 lcl|GPHN_1:8-2218_ORF1_GPHN_1:7:2217, XP_017170562.1, XP_017170563.1, XP_017170564.1, XP_017170565.1 lcl|GPHN_29:8-2323_ORF1_GPHN_…
ADVIITSGGVSMGEKDYLKQ	ADVIITSGGVSM(+15.99)GEKDYLKQ	M12:Oxidation (M):1000.00	36.68	2126.06	-0.5	709.692	23.67	NP_666077.2 lcl|GPHN_4:8-2326_ORF1_GPHN_4:7:2325, XP_006515962.1, XP_006515963.1, XP_006515964.1, XP_006515965.1, XP_006515966.1, XP_006515967.1, XP_006515968.1 lcl|GPHN_38:8-2365_ORF1_GPHN_38:7:2364, XP_006515969.1 lcl|GPHN_3:8-2257_ORF1_GPHN_3:7:2256, XP_006515970.1 lcl|GPHN_1:8-2218_ORF1_GPHN_1:7:2217, XP_017170562.1, XP_017170563.1, XP_017170564.1, XP_017170565.1 lcl|GPHN_29:8-2323_ORF1_GPHN_…
ADVIITSGGVSMGEKDYLKQV	ADVIITSGGVSM(+15.99)GEKDYLKQV	M12:Oxidation (M):1000.00	28.27	2225.12	-2.2	742.714	25.58	NP_666077.2 lcl|GPHN_4:8-2326_ORF1_GPHN_4:7:2325, XP_006515962.1, XP_006515963.1, XP_006515964.1, XP_006515965.1, XP_006515966.1, XP_006515967.1, XP_006515968.1 lcl|GPHN_38:8-2365_ORF1_GPHN_38:7:2364, XP_006515969.1 lcl|GPHN_3:8-2257_ORF1_GPHN_3:7:2256, XP_006515970.1 lcl|GPHN_1:8-2218_ORF1_GPHN_1:7:2217, XP_017170562.1, XP_017170563.1, XP_017170564.1, XP_017170565.1 lcl|GPHN_29:8-2323_ORF1_GPHN_…
AEDRSGINLKDLVQDPS	AEDRSGINLKDLVQDPS		44.41	1855.93	0.6	619.65	25.79	NP_666077.2 lcl|GPHN_4:8-2326_ORF1_GPHN_4:7:2325, XP_006515962.1, XP_006515963.1, XP_006515964.1, XP_006515965.1, XP_006515966.1, XP_006515967.1, XP_006515968.1 lcl|GPHN_38:8-2365_ORF1_GPHN_38:7:2364, XP_006515969.1 lcl|GPHN_3:8-2257_ORF1_GPHN_3:7:2256, XP_006515970.1 lcl|GPHN_1:8-2218_ORF1_GPHN_1:7:2217, XP_017170562.1, XP_017170563.1, XP_017170564.1, XP_017170565.1 lcl|GPHN_29:8-2323_ORF1_GPHN_…
AEDRSGINLKDLVQDPSLL	AEDRSGINLKDLVQDPSLL		41.17	2082.1	0.8	695.04	31.32	NP_666077.2 lcl|GPHN_4:8-2326_ORF1_GPHN_4:7:2325, XP_006515962.1, XP_006515963.1, XP_006515964.1, XP_006515965.1, XP_006515966.1, XP_006515967.1, XP_006515968.1 lcl|GPHN_38:8-2365_ORF1_GPHN_38:7:2364, XP_006515969.1 lcl|GPHN_3:8-2257_ORF1_GPHN_3:7:2256, XP_006515970.1 lcl|GPHN_1:8-2218_ORF1_GPHN_1:7:2217, XP_017170562.1, XP_017170563.1, XP_017170564.1, XP_017170565.1 lcl|GPHN_29:8-2323_ORF1_GPHN_…
AEDRSGINLKDLVQDPSLL	A(+42.01)EDRSGINLKDLVQDPSLL	A1:Acetylation (Protein N-term):1000.00	22.26	2124.11	0.8	709.043	33.02	NP_666077.2 lcl|GPHN_4:8-2326_ORF1_GPHN_4:7:2325, XP_006515962.1, XP_006515963.1, XP_006515964.1, XP_006515965.1, XP_006515966.1, XP_006515967.1, XP_006515968.1 lcl|GPHN_38:8-2365_ORF1_GPHN_38:7:2364, XP_006515969.1 lcl|GPHN_3:8-2257_ORF1_GPHN_3:7:2256, XP_006515970.1 lcl|GPHN_1:8-2218_ORF1_GPHN_1:7:2217, XP_017170562.1, XP_017170563.1, XP_017170564.1, XP_017170565.1 lcl|GPHN_29:8-2323_ORF1_GPHN_…
AEDRSGINLKDLVQDPSLLGGTI	AEDRSGINLKDLVQDPSLLGGTI		22.03	2410.27	6.2	804.436	33.29	NP_666077.2 lcl|GPHN_4:8-2326_ORF1_GPHN_4:7:2325, XP_006515962.1, XP_006515963.1, XP_006515964.1, XP_006515965.1, XP_006515966.1, XP_006515967.1, XP_006515968.1 lcl|GPHN_38:8-2365_ORF1_GPHN_38:7:2364, XP_006515969.1 lcl|GPHN_3:8-2257_ORF1_GPHN_3:7:2256, XP_006515970.1 lcl|GPHN_1:8-2218_ORF1_GPHN_1:7:2217, XP_017170562.1, XP_017170563.1, XP_017170564.1, XP_017170565.1 lcl|GPHN_29:8-2323_ORF1_GPHN_…
AEDRSGINLKDLVQDPSLLGGTIS	AEDRSGINLKDLVQDPSLLGGTIS		25.43	2497.3	1.2	833.442	32.49	NP_666077.2 lcl|GPHN_4:8-2326_ORF1_GPHN_4:7:2325, XP_006515962.1, XP_006515963.1, XP_006515964.1, XP_006515965.1, XP_006515966.1, XP_006515967.1, XP_006515968.1 lcl|GPHN_38:8-2365_ORF1_GPHN_38:7:2364, XP_006515969.1 lcl|GPHN_3:8-2257_ORF1_GPHN_3:7:2256, XP_006515970.1 lcl|GPHN_1:8-2218_ORF1_GPHN_1:7:2217, XP_017170562.1, XP_017170563.1, XP_017170564.1, XP_017170565.1 lcl|GPHN_29:8-2323_ORF1_GPHN_…
AFITVLEMTPVLGT	AFITVLEM(+15.99)TPVLGT	M8:Oxidation (M):1000.00	35.08	1506.8	-0.2	754.407	37.18	NP_666077.2 lcl|GPHN_4:8-2326_ORF1_GPHN_4:7:2325, XP_006515962.1, XP_006515963.1, XP_006515964.1, XP_006515965.1, XP_006515966.1, XP_006515967.1, XP_006515968.1 lcl|GPHN_38:8-2365_ORF1_GPHN_38:7:2364, XP_006515969.1 lcl|GPHN_3:8-2257_ORF1_GPHN_3:7:2256, XP_006515970.1 lcl|GPHN_1:8-2218_ORF1_GPHN_1:7:2217, XP_017170562.1, XP_017170563.1, XP_017170564.1, XP_017170565.1 lcl|GPHN_29:8-2323_ORF1_GPHN_…
AFITVLEMTPVLGT	AFITVLEMTPVLGT		27.76	1490.81	4.7	746.413	39.24	NP_666077.2 lcl|GPHN_4:8-2326_ORF1_GPHN_4:7:2325, XP_006515962.1, XP_006515963.1, XP_006515964.1, XP_006515965.1, XP_006515966.1, XP_006515967.1, XP_006515968.1 lcl|GPHN_38:8-2365_ORF1_GPHN_38:7:2364, XP_006515969.1 lcl|GPHN_3:8-2257_ORF1_GPHN_3:7:2256, XP_006515970.1 lcl|GPHN_1:8-2218_ORF1_GPHN_1:7:2217, XP_017170562.1, XP_017170563.1, XP_017170564.1, XP_017170565.1 lcl|GPHN_29:8-2323_ORF1_GPHN_…
AFITVLEMTPVLGTEIIN	AFITVLEM(+15.99)TPVLGTEIIN	M8:Oxidation (M):1000.00	33.37	1976.05	1.4	989.036	39.07	NP_666077.2 lcl|GPHN_4:8-2326_ORF1_GPHN_4:7:2325, XP_006515962.1, XP_006515963.1, XP_006515964.1, XP_006515965.1, XP_006515966.1, XP_006515967.1, XP_006515968.1 lcl|GPHN_38:8-2365_ORF1_GPHN_38:7:2364, XP_006515969.1 lcl|GPHN_3:8-2257_ORF1_GPHN_3:7:2256, XP_006515970.1 lcl|GPHN_1:8-2218_ORF1_GPHN_1:7:2217, XP_017170562.1, XP_017170563.1, XP_017170564.1, XP_017170565.1 lcl|GPHN_29:8-2323_ORF1_GPHN_…
AFITVLEMTPVLGTEIINYR	A(+42.01)FITVLEM(+15.99)TPVLGTEIINYR	A1:Acetylation (Protein N-term):1000.00;M8:Oxidation (M):1000.00	54.08	2337.23	0.1	1169.62	39.24	NP_666077.2 lcl|GPHN_4:8-2326_ORF1_GPHN_4:7:2325, XP_006515962.1, XP_006515963.1, XP_006515964.1, XP_006515965.1, XP_006515966.1, XP_006515967.1, XP_006515968.1 lcl|GPHN_38:8-2365_ORF1_GPHN_38:7:2364, XP_006515969.1 lcl|GPHN_3:8-2257_ORF1_GPHN_3:7:2256, XP_006515970.1 lcl|GPHN_1:8-2218_ORF1_GPHN_1:7:2217, XP_017170562.1, XP_017170563.1, XP_017170564.1, XP_017170565.1 lcl|GPHN_29:8-2323_ORF1_GPHN_…
AFITVLEMTPVLGTEIINYR	AFITVLEMTPVLGTEIINYR		53.28	2279.22	1.9	760.75	38.62	NP_666077.2 lcl|GPHN_4:8-2326_ORF1_GPHN_4:7:2325, XP_006515962.1, XP_006515963.1, XP_006515964.1, XP_006515965.1, XP_006515966.1, XP_006515967.1, XP_006515968.1 lcl|GPHN_38:8-2365_ORF1_GPHN_38:7:2364, XP_006515969.1 lcl|GPHN_3:8-2257_ORF1_GPHN_3:7:2256, XP_006515970.1 lcl|GPHN_1:8-2218_ORF1_GPHN_1:7:2217, XP_017170562.1, XP_017170563.1, XP_017170564.1, XP_017170565.1 lcl|GPHN_29:8-2323_ORF1_GPHN_…
AFITVLEMTPVLGTEIINYR	AFITVLEM(+15.99)TPVLGTEIINYR	M8:Oxidation (M):1000.00	52.2	2295.22	0.4	1148.62	36.28	NP_666077.2 lcl|GPHN_4:8-2326_ORF1_GPHN_4:7:2325, XP_006515962.1, XP_006515963.1, XP_006515964.1, XP_006515965.1, XP_006515966.1, XP_006515967.1, XP_006515968.1 lcl|GPHN_38:8-2365_ORF1_GPHN_38:7:2364, XP_006515969.1 lcl|GPHN_3:8-2257_ORF1_GPHN_3:7:2256, XP_006515970.1 lcl|GPHN_1:8-2218_ORF1_GPHN_1:7:2217, XP_017170562.1, XP_017170563.1, XP_017170564.1, XP_017170565.1 lcl|GPHN_29:8-2323_ORF1_GPHN_…
AFITVLEMTPVLGTEIINYR	A(+42.01)FITVLEMTPVLGTEIINYR	A1:Acetylation (Protein N-term):1000.00	36.82	2321.23	1.1	774.753	39.21	NP_666077.2 lcl|GPHN_4:8-2326_ORF1_GPHN_4:7:2325, XP_006515962.1, XP_006515963.1, XP_006515964.1, XP_006515965.1, XP_006515966.1, XP_006515967.1, XP_006515968.1 lcl|GPHN_38:8-2365_ORF1_GPHN_38:7:2364, XP_006515969.1 lcl|GPHN_3:8-2257_ORF1_GPHN_3:7:2256, XP_006515970.1 lcl|GPHN_1:8-2218_ORF1_GPHN_1:7:2217, XP_017170562.1, XP_017170563.1, XP_017170564.1, XP_017170565.1 lcl|GPHN_29:8-2323_ORF1_GPHN_…
AGEQPTQTVMPGQVMR	AGEQPTQTVM(+15.99)PGQVM(+15.99)R	M10:Oxidation (M):1000.00;M15:Oxidation (M):1000.00	34.22	1760.82	-1.5	881.415	18.15	NP_666077.2 lcl|GPHN_4:8-2326_ORF1_GPHN_4:7:2325, XP_006515962.1, XP_006515963.1, XP_006515964.1, XP_006515965.1, XP_006515966.1, XP_006515967.1, XP_006515968.1 lcl|GPHN_38:8-2365_ORF1_GPHN_38:7:2364, XP_006515969.1 lcl|GPHN_3:8-2257_ORF1_GPHN_3:7:2256, XP_006515970.1 lcl|GPHN_1:8-2218_ORF1_GPHN_1:7:2217, XP_017170562.1, XP_017170563.1, XP_017170564.1, XP_017170565.1 lcl|GPHN_29:8-2323_ORF1_GPHN_…
AIDLLRDAIV	AIDLLRDAIV		22.08	1097.64	-0.7	549.829	31.52	NP_666077.2 lcl|GPHN_4:8-2326_ORF1_GPHN_4:7:2325, XP_006515962.1, XP_006515963.1, XP_006515964.1, XP_006515965.1, XP_006515966.1, XP_006515967.1, XP_006515968.1 lcl|GPHN_38:8-2365_ORF1_GPHN_38:7:2364, XP_006515969.1 lcl|GPHN_3:8-2257_ORF1_GPHN_3:7:2256, XP_006515970.1 lcl|GPHN_1:8-2218_ORF1_GPHN_1:7:2217, XP_017170562.1, XP_017170563.1, XP_017170564.1, XP_017170565.1 lcl|GPHN_29:8-2323_ORF1_GPHN_…
AIDLLRDAIVK	AIDLLRDAIVK		21.31	1225.74	-0.4	613.877	26.42	NP_666077.2 lcl|GPHN_4:8-2326_ORF1_GPHN_4:7:2325, XP_006515962.1, XP_006515963.1, XP_006515964.1, XP_006515965.1, XP_006515966.1, XP_006515967.1, XP_006515968.1 lcl|GPHN_38:8-2365_ORF1_GPHN_38:7:2364, XP_006515969.1 lcl|GPHN_3:8-2257_ORF1_GPHN_3:7:2256, XP_006515970.1 lcl|GPHN_1:8-2218_ORF1_GPHN_1:7:2217, XP_017170562.1, XP_017170563.1, XP_017170564.1, XP_017170565.1 lcl|GPHN_29:8-2323_ORF1_GPHN_…
AKDNLPPFPA	AKDNLPPFPA		26	1068.56	-0.8	535.287	24.59	NP_666077.2 lcl|GPHN_4:8-2326_ORF1_GPHN_4:7:2325, XP_006515962.1, XP_006515963.1, XP_006515964.1, XP_006515965.1, XP_006515966.1, XP_006515967.1, XP_006515968.1 lcl|GPHN_38:8-2365_ORF1_GPHN_38:7:2364, XP_006515969.1 lcl|GPHN_3:8-2257_ORF1_GPHN_3:7:2256, XP_006515970.1 lcl|GPHN_1:8-2218_ORF1_GPHN_1:7:2217, XP_017170562.1, XP_017170563.1, XP_017170564.1, XP_017170565.1 lcl|GPHN_29:8-2323_ORF1_GPHN_…
AKDNLPPFPAS	AKDNLPPFPAS		28.07	1155.59	3.4	578.805	23.96	NP_666077.2 lcl|GPHN_4:8-2326_ORF1_GPHN_4:7:2325, XP_006515962.1, XP_006515963.1, XP_006515964.1, XP_006515965.1, XP_006515966.1, XP_006515967.1, XP_006515968.1 lcl|GPHN_38:8-2365_ORF1_GPHN_38:7:2364, XP_006515969.1 lcl|GPHN_3:8-2257_ORF1_GPHN_3:7:2256, XP_006515970.1 lcl|GPHN_1:8-2218_ORF1_GPHN_1:7:2217, XP_017170562.1, XP_017170563.1, XP_017170564.1, XP_017170565.1 lcl|GPHN_29:8-2323_ORF1_GPHN_…
AKDNLPPFPASVK	AKDNLPPFPASVK		29.98	1382.76	-2	461.925	22.05	NP_666077.2 lcl|GPHN_4:8-2326_ORF1_GPHN_4:7:2325, XP_006515962.1, XP_006515963.1, XP_006515964.1, XP_006515965.1, XP_006515966.1, XP_006515967.1, XP_006515968.1 lcl|GPHN_38:8-2365_ORF1_GPHN_38:7:2364, XP_006515969.1 lcl|GPHN_3:8-2257_ORF1_GPHN_3:7:2256, XP_006515970.1 lcl|GPHN_1:8-2218_ORF1_GPHN_1:7:2217, XP_017170562.1, XP_017170563.1, XP_017170564.1, XP_017170565.1 lcl|GPHN_29:8-2323_ORF1_GPHN_…
AKDNLPPFPASVKDGYA	AKDNLPPFPASVKDGYA		37	1788.9	0.1	597.309	24.27	NP_666077.2 lcl|GPHN_4:8-2326_ORF1_GPHN_4:7:2325, XP_006515962.1, XP_006515963.1, XP_006515964.1, XP_006515965.1, XP_006515966.1, XP_006515967.1, XP_006515968.1 lcl|GPHN_38:8-2365_ORF1_GPHN_38:7:2364, XP_006515969.1 lcl|GPHN_3:8-2257_ORF1_GPHN_3:7:2256, XP_006515970.1 lcl|GPHN_1:8-2218_ORF1_GPHN_1:7:2217, XP_017170562.1, XP_017170563.1, XP_017170564.1, XP_017170565.1 lcl|GPHN_29:8-2323_ORF1_GPHN_…
AKGTHMGPSEI	AKGTHM(+15.99)GPSEI	M6:Oxidation (M):1000.00	20.92	1142.54	-1	572.276	13.39	NP_666077.2 lcl|GPHN_4:8-2326_ORF1_GPHN_4:7:2325, XP_006515962.1, XP_006515963.1, XP_006515964.1, XP_006515965.1, XP_006515966.1, XP_006515967.1, XP_006515968.1 lcl|GPHN_38:8-2365_ORF1_GPHN_38:7:2364, XP_006515969.1 lcl|GPHN_3:8-2257_ORF1_GPHN_3:7:2256, XP_006515970.1 lcl|GPHN_1:8-2218_ORF1_GPHN_1:7:2217, XP_017170562.1, XP_017170563.1, XP_017170564.1, XP_017170565.1 lcl|GPHN_29:8-2323_ORF1_GPHN_…
AKGTHMGPSEIG	AKGTHMGPSEIG		20.1	1183.57	0	395.529	15.57	NP_666077.2 lcl|GPHN_4:8-2326_ORF1_GPHN_4:7:2325, XP_006515962.1, XP_006515963.1, XP_006515964.1, XP_006515965.1, XP_006515966.1, XP_006515967.1, XP_006515968.1 lcl|GPHN_38:8-2365_ORF1_GPHN_38:7:2364, XP_006515969.1 lcl|GPHN_3:8-2257_ORF1_GPHN_3:7:2256, XP_006515970.1 lcl|GPHN_1:8-2218_ORF1_GPHN_1:7:2217, XP_017170562.1, XP_017170563.1, XP_017170564.1, XP_017170565.1 lcl|GPHN_29:8-2323_ORF1_GPHN_…
AKGTHMGPSEIGL	AKGTHM(+15.99)GPSEIGL	M6:Oxidation (M):1000.00	38.87	1312.64	0.6	657.33	18.15	NP_666077.2 lcl|GPHN_4:8-2326_ORF1_GPHN_4:7:2325, XP_006515962.1, XP_006515963.1, XP_006515964.1, XP_006515965.1, XP_006515966.1, XP_006515967.1, XP_006515968.1 lcl|GPHN_38:8-2365_ORF1_GPHN_38:7:2364, XP_006515969.1 lcl|GPHN_3:8-2257_ORF1_GPHN_3:7:2256, XP_006515970.1 lcl|GPHN_1:8-2218_ORF1_GPHN_1:7:2217, XP_017170562.1, XP_017170563.1, XP_017170564.1, XP_017170565.1 lcl|GPHN_29:8-2323_ORF1_GPHN_…
AKIPDSI	AKIPDSI		22.66	742.423	1.7	372.219	20.87	XP_006515966.1, XP_006515967.1, XP_006515969.1 lcl|GPHN_3:8-2257_ORF1_GPHN_3:7:2256, XP_006515970.1 lcl|GPHN_1:8-2218_ORF1_GPHN_1:7:2217, XP_017170565.1 lcl|GPHN_29:8-2323_ORF1_GPHN_29:7:2322, XP_017170566.1, XP_017170567.1, XP_030102590.1 lcl|GPHN_41:8-2320_ORF1_GPHN_41:7:2319, XP_030102591.1 lcl|GPHN_8:8-2281_ORF1_GPHN_8:7:2280, lcl|GPHN_100:8-925_ORF2_GPHN_100:7:924 lcl|GPHN_220:8-925_ORF2_GPH…
AKIPDSII	AKIPDSII		20.67	855.506	-1.5	428.76	24.87	XP_006515966.1, XP_006515967.1, XP_006515969.1 lcl|GPHN_3:8-2257_ORF1_GPHN_3:7:2256, XP_006515970.1 lcl|GPHN_1:8-2218_ORF1_GPHN_1:7:2217, XP_017170565.1 lcl|GPHN_29:8-2323_ORF1_GPHN_29:7:2322, XP_017170566.1, XP_017170567.1, XP_030102590.1 lcl|GPHN_41:8-2320_ORF1_GPHN_41:7:2319, XP_030102591.1 lcl|GPHN_8:8-2281_ORF1_GPHN_8:7:2280, lcl|GPHN_100:8-925_ORF2_GPHN_100:7:924 lcl|GPHN_220:8-925_ORF2_GPH…
AKIPDSIIS	AKIPDSIIS		22.11	942.539	0.8	472.277	23.58	XP_006515966.1, XP_006515967.1, XP_006515969.1 lcl|GPHN_3:8-2257_ORF1_GPHN_3:7:2256, XP_006515970.1 lcl|GPHN_1:8-2218_ORF1_GPHN_1:7:2217, XP_017170565.1 lcl|GPHN_29:8-2323_ORF1_GPHN_29:7:2322, XP_017170566.1, XP_017170567.1, XP_030102590.1 lcl|GPHN_41:8-2320_ORF1_GPHN_41:7:2319, XP_030102591.1 lcl|GPHN_8:8-2281_ORF1_GPHN_8:7:2280, lcl|GPHN_100:8-925_ORF2_GPHN_100:7:924 lcl|GPHN_220:8-925_ORF2_GPH…
AKIPDSIISR	AKIPDSIISR		29	1098.64	3.2	367.222	20.5	XP_006515966.1, XP_006515967.1, XP_006515969.1 lcl|GPHN_3:8-2257_ORF1_GPHN_3:7:2256, XP_006515970.1 lcl|GPHN_1:8-2218_ORF1_GPHN_1:7:2217, XP_017170565.1 lcl|GPHN_29:8-2323_ORF1_GPHN_29:7:2322, XP_017170566.1, XP_017170567.1, XP_030102590.1 lcl|GPHN_41:8-2320_ORF1_GPHN_41:7:2319, XP_030102591.1 lcl|GPHN_8:8-2281_ORF1_GPHN_8:7:2280, lcl|GPHN_100:8-925_ORF2_GPHN_100:7:924 lcl|GPHN_220:8-925_ORF2_GPH…
AKIPDSIISRG	AKIPDSIISRG		30.65	1155.66	-2	386.227	20.51	XP_006515966.1, XP_006515967.1, XP_006515969.1 lcl|GPHN_3:8-2257_ORF1_GPHN_3:7:2256, XP_006515970.1 lcl|GPHN_1:8-2218_ORF1_GPHN_1:7:2217, XP_017170565.1 lcl|GPHN_29:8-2323_ORF1_GPHN_29:7:2322, XP_017170566.1, XP_017170567.1, XP_030102590.1 lcl|GPHN_41:8-2320_ORF1_GPHN_41:7:2319, XP_030102591.1 lcl|GPHN_8:8-2281_ORF1_GPHN_8:7:2280, lcl|GPHN_100:8-925_ORF2_GPHN_100:7:924 lcl|GPHN_220:8-925_ORF2_GPH…
AKIPDSIISRGV	AKIPDSIISRGV		21.63	1254.73	0.1	419.25	22.81	XP_006515966.1, XP_006515967.1, XP_006515969.1 lcl|GPHN_3:8-2257_ORF1_GPHN_3:7:2256, XP_006515970.1 lcl|GPHN_1:8-2218_ORF1_GPHN_1:7:2217, XP_017170565.1 lcl|GPHN_29:8-2323_ORF1_GPHN_29:7:2322, XP_017170566.1, XP_017170567.1, XP_030102590.1 lcl|GPHN_41:8-2320_ORF1_GPHN_41:7:2319, XP_030102591.1 lcl|GPHN_8:8-2281_ORF1_GPHN_8:7:2280, lcl|GPHN_100:8-925_ORF2_GPHN_100:7:924 lcl|GPHN_220:8-925_ORF2_GPH…
AKIPDSIISRGVQVLPRDTA	AKIPDSIISRGVQVLPRDTA		34.72	2135.21	-1.2	534.808	25.38	XP_006515966.1, XP_006515967.1, XP_006515969.1 lcl|GPHN_3:8-2257_ORF1_GPHN_3:7:2256, XP_006515970.1 lcl|GPHN_1:8-2218_ORF1_GPHN_1:7:2217, XP_017170565.1 lcl|GPHN_29:8-2323_ORF1_GPHN_29:7:2322, XP_017170566.1, XP_017170567.1, XP_030102590.1 lcl|GPHN_41:8-2320_ORF1_GPHN_41:7:2319, XP_030102591.1 lcl|GPHN_8:8-2281_ORF1_GPHN_8:7:2280, lcl|GPHN_100:8-925_ORF2_GPHN_100:7:924 lcl|GPHN_220:8-925_ORF2_GPH…
AKKHPFYTSPA	AKKHPFYTSPA		33.92	1245.65	0.1	623.833	15.29	NP_666077.2 lcl|GPHN_4:8-2326_ORF1_GPHN_4:7:2325, XP_006515962.1, XP_006515963.1, XP_006515964.1, XP_006515965.1, XP_006515968.1 lcl|GPHN_38:8-2365_ORF1_GPHN_38:7:2364, XP_017170562.1, XP_017170563.1, XP_017170564.1, lcl|GPHN_101:8-994_ORF2_GPHN_101:7:993, lcl|GPHN_105:73-2247_ORF1_GPHN_105:72:2246, lcl|GPHN_119:441-2183_ORF3_GPHN_119:440:2182, lcl|GPHN_121:8-2368_ORF1_GPHN_121:7:2367, lcl|GPHN_1…
ALNEGISR	ALNEGISR		28.09	858.456	-0.2	430.235	16.67	NP_666077.2 lcl|GPHN_4:8-2326_ORF1_GPHN_4:7:2325, XP_006515962.1, XP_006515963.1, XP_006515964.1, XP_006515965.1, XP_006515966.1, XP_006515967.1, XP_006515968.1 lcl|GPHN_38:8-2365_ORF1_GPHN_38:7:2364, XP_006515969.1 lcl|GPHN_3:8-2257_ORF1_GPHN_3:7:2256, XP_006515970.1 lcl|GPHN_1:8-2218_ORF1_GPHN_1:7:2217, XP_017170562.1, XP_017170563.1, XP_017170564.1, XP_017170565.1 lcl|GPHN_29:8-2323_ORF1_GPHN_…
ALNEGISRA	ALNEGISRA		26.87	929.493	0.1	465.754	17.31	NP_666077.2 lcl|GPHN_4:8-2326_ORF1_GPHN_4:7:2325, XP_006515962.1, XP_006515963.1, XP_006515964.1, XP_006515965.1, XP_006515966.1, XP_006515967.1, XP_006515968.1 lcl|GPHN_38:8-2365_ORF1_GPHN_38:7:2364, XP_006515969.1 lcl|GPHN_3:8-2257_ORF1_GPHN_3:7:2256, XP_006515970.1 lcl|GPHN_1:8-2218_ORF1_GPHN_1:7:2217, XP_017170562.1, XP_017170563.1, XP_017170564.1, XP_017170565.1 lcl|GPHN_29:8-2323_ORF1_GPHN_…
ALPGNPVSA	ALPGNPVSA		21.24	824.439	-0.5	413.227	23.45	NP_666077.2 lcl|GPHN_4:8-2326_ORF1_GPHN_4:7:2325, XP_006515962.1, XP_006515963.1, XP_006515964.1, XP_006515965.1, XP_006515966.1, XP_006515967.1, XP_006515968.1 lcl|GPHN_38:8-2365_ORF1_GPHN_38:7:2364, XP_006515969.1 lcl|GPHN_3:8-2257_ORF1_GPHN_3:7:2256, XP_006515970.1 lcl|GPHN_1:8-2218_ORF1_GPHN_1:7:2217, XP_017170562.1, XP_017170563.1, XP_017170564.1, XP_017170565.1 lcl|GPHN_29:8-2323_ORF1_GPHN_…
ALPGNPVSAVVTCNL	ALPGNPVSAVVTC(+57.02)NL	C13:Carbamidomethylation:1000.00	29.85	1510.78	-0.3	756.398	32.86	NP_666077.2 lcl|GPHN_4:8-2326_ORF1_GPHN_4:7:2325, XP_006515962.1, XP_006515963.1, XP_006515964.1, XP_006515965.1, XP_006515966.1, XP_006515967.1, XP_006515968.1 lcl|GPHN_38:8-2365_ORF1_GPHN_38:7:2364, XP_006515969.1 lcl|GPHN_3:8-2257_ORF1_GPHN_3:7:2256, XP_006515970.1 lcl|GPHN_1:8-2218_ORF1_GPHN_1:7:2217, XP_017170562.1, XP_017170563.1, XP_017170564.1, XP_017170565.1 lcl|GPHN_29:8-2323_ORF1_GPHN_…
ALPGNPVSAVVTCNLFVVPALR	ALPGNPVSAVVTC(+57.02)NLFVVPALR	C13:Carbamidomethylation:1000.00	38.73	2293.26	0.5	1147.64	36.23	NP_666077.2 lcl|GPHN_4:8-2326_ORF1_GPHN_4:7:2325, XP_006515962.1, XP_006515963.1, XP_006515964.1, XP_006515965.1, XP_006515966.1, XP_006515967.1, XP_006515968.1 lcl|GPHN_38:8-2365_ORF1_GPHN_38:7:2364, XP_006515969.1 lcl|GPHN_3:8-2257_ORF1_GPHN_3:7:2256, XP_006515970.1 lcl|GPHN_1:8-2218_ORF1_GPHN_1:7:2217, XP_017170562.1, XP_017170563.1, XP_017170564.1, XP_017170565.1 lcl|GPHN_29:8-2323_ORF1_GPHN_…
ALPGNPVSAVVTCNLFVVPALRK	ALPGNPVSAVVTC(+57.02)NLFVVPALRK	C13:Carbamidomethylation:1000.00	41.73	2421.36	2.3	808.128	32.68	NP_666077.2 lcl|GPHN_4:8-2326_ORF1_GPHN_4:7:2325, XP_006515962.1, XP_006515963.1, XP_006515964.1, XP_006515965.1, XP_006515966.1, XP_006515967.1, XP_006515968.1 lcl|GPHN_38:8-2365_ORF1_GPHN_38:7:2364, XP_006515969.1 lcl|GPHN_3:8-2257_ORF1_GPHN_3:7:2256, XP_006515970.1 lcl|GPHN_1:8-2218_ORF1_GPHN_1:7:2217, XP_017170562.1, XP_017170563.1, XP_017170564.1, XP_017170565.1 lcl|GPHN_29:8-2323_ORF1_GPHN_…
ALPHAIDLLR	ALPHAIDLLR		31.38	1117.66	-1.3	559.837	25.28	NP_666077.2 lcl|GPHN_4:8-2326_ORF1_GPHN_4:7:2325, XP_006515962.1, XP_006515963.1, XP_006515964.1, XP_006515965.1, XP_006515966.1, XP_006515967.1, XP_006515968.1 lcl|GPHN_38:8-2365_ORF1_GPHN_38:7:2364, XP_006515969.1 lcl|GPHN_3:8-2257_ORF1_GPHN_3:7:2256, XP_006515970.1 lcl|GPHN_1:8-2218_ORF1_GPHN_1:7:2217, XP_017170562.1, XP_017170563.1, XP_017170564.1, XP_017170565.1 lcl|GPHN_29:8-2323_ORF1_GPHN_…
AMLMGSLNVTPL	AM(+15.99)LM(+15.99)GSLNVTPL	M2:Oxidation (M):1000.00;M4:Oxidation (M):1000.00	32.33	1277.64	0.3	639.825	30.24	NP_666077.2 lcl|GPHN_4:8-2326_ORF1_GPHN_4:7:2325, XP_006515962.1, XP_006515963.1, XP_006515964.1, XP_006515965.1, XP_006515966.1, XP_006515967.1, XP_006515968.1 lcl|GPHN_38:8-2365_ORF1_GPHN_38:7:2364, XP_006515969.1 lcl|GPHN_3:8-2257_ORF1_GPHN_3:7:2256, XP_006515970.1 lcl|GPHN_1:8-2218_ORF1_GPHN_1:7:2217, XP_017170562.1, XP_017170563.1, XP_017170564.1, XP_017170565.1 lcl|GPHN_29:8-2323_ORF1_GPHN_…
AMLMGSLNVTPL	AM(+15.99)LMGSLNVTPL	M2:Oxidation (M):26.31	23.28	1261.64	-0.5	631.827	33.54	NP_666077.2 lcl|GPHN_4:8-2326_ORF1_GPHN_4:7:2325, XP_006515962.1, XP_006515963.1, XP_006515964.1, XP_006515965.1, XP_006515966.1, XP_006515967.1, XP_006515968.1 lcl|GPHN_38:8-2365_ORF1_GPHN_38:7:2364, XP_006515969.1 lcl|GPHN_3:8-2257_ORF1_GPHN_3:7:2256, XP_006515970.1 lcl|GPHN_1:8-2218_ORF1_GPHN_1:7:2217, XP_017170562.1, XP_017170563.1, XP_017170564.1, XP_017170565.1 lcl|GPHN_29:8-2323_ORF1_GPHN_…
AMLMGSLNVTPL	A(+42.01)MLM(+15.99)GSLNVTPL	A1:Acetylation (Protein N-term):1000.00;M4:Oxidation (M):26.31	20.72	1303.65	0.4	652.833	33.44	NP_666077.2 lcl|GPHN_4:8-2326_ORF1_GPHN_4:7:2325, XP_006515962.1, XP_006515963.1, XP_006515964.1, XP_006515965.1, XP_006515966.1, XP_006515967.1, XP_006515968.1 lcl|GPHN_38:8-2365_ORF1_GPHN_38:7:2364, XP_006515969.1 lcl|GPHN_3:8-2257_ORF1_GPHN_3:7:2256, XP_006515970.1 lcl|GPHN_1:8-2218_ORF1_GPHN_1:7:2217, XP_017170562.1, XP_017170563.1, XP_017170564.1, XP_017170565.1 lcl|GPHN_29:8-2323_ORF1_GPHN_…
AMLMGSLNVTPLGMLSR	AMLM(+15.99)GSLNVTPLGM(+15.99)LSR	M4:Oxidation (M):22.85;M14:Oxidation (M):160.66	44.67	1821.91	1.3	911.966	30.09	NP_666077.2 lcl|GPHN_4:8-2326_ORF1_GPHN_4:7:2325, XP_006515962.1, XP_006515963.1, XP_006515964.1, XP_006515965.1, XP_006515966.1, XP_006515967.1, XP_006515968.1 lcl|GPHN_38:8-2365_ORF1_GPHN_38:7:2364, XP_006515969.1 lcl|GPHN_3:8-2257_ORF1_GPHN_3:7:2256, XP_006515970.1 lcl|GPHN_1:8-2218_ORF1_GPHN_1:7:2217, XP_017170562.1, XP_017170563.1, XP_017170564.1, XP_017170565.1 lcl|GPHN_29:8-2323_ORF1_GPHN_…
AMLMGSLNVTPLGMLSR	AM(+15.99)LM(+15.99)GSLNVTPLGM(+15.99)LSR	M2:Oxidation (M):1000.00;M4:Oxidation (M):1000.00;M14:Oxidation (M):1000.00	38.79	1837.91	1.8	919.964	28.43	NP_666077.2 lcl|GPHN_4:8-2326_ORF1_GPHN_4:7:2325, XP_006515962.1, XP_006515963.1, XP_006515964.1, XP_006515965.1, XP_006515966.1, XP_006515967.1, XP_006515968.1 lcl|GPHN_38:8-2365_ORF1_GPHN_38:7:2364, XP_006515969.1 lcl|GPHN_3:8-2257_ORF1_GPHN_3:7:2256, XP_006515970.1 lcl|GPHN_1:8-2218_ORF1_GPHN_1:7:2217, XP_017170562.1, XP_017170563.1, XP_017170564.1, XP_017170565.1 lcl|GPHN_29:8-2323_ORF1_GPHN_…
AMLMGSLNVTPLGMLSR	AMLMGSLNVTPLGM(+15.99)LSR	M14:Oxidation (M):59.20	28.71	1805.92	3.7	903.971	32.32	NP_666077.2 lcl|GPHN_4:8-2326_ORF1_GPHN_4:7:2325, XP_006515962.1, XP_006515963.1, XP_006515964.1, XP_006515965.1, XP_006515966.1, XP_006515967.1, XP_006515968.1 lcl|GPHN_38:8-2365_ORF1_GPHN_38:7:2364, XP_006515969.1 lcl|GPHN_3:8-2257_ORF1_GPHN_3:7:2256, XP_006515970.1 lcl|GPHN_1:8-2218_ORF1_GPHN_1:7:2217, XP_017170562.1, XP_017170563.1, XP_017170564.1, XP_017170565.1 lcl|GPHN_29:8-2323_ORF1_GPHN_…
ANGLLMLPPKTEQYVELHKGEVV	ANGLLMLPPKTEQYVELHKGEVV		29.31	2564.37	-1.9	642.098	27.39	NP_666077.2 lcl|GPHN_4:8-2326_ORF1_GPHN_4:7:2325, XP_006515962.1, XP_006515963.1, XP_006515964.1, XP_006515965.1, XP_006515966.1, XP_006515967.1, XP_006515968.1 lcl|GPHN_38:8-2365_ORF1_GPHN_38:7:2364, XP_006515969.1 lcl|GPHN_3:8-2257_ORF1_GPHN_3:7:2256, XP_006515970.1 lcl|GPHN_1:8-2218_ORF1_GPHN_1:7:2217, XP_017170562.1, XP_017170563.1, XP_017170564.1, XP_017170565.1 lcl|GPHN_29:8-2323_ORF1_GPHN_…
ANGLLMLPPKTEQYVELHKGEVV	ANGLLM(+15.99)LPPKTEQYVELHKGEVV	M6:Oxidation (M):1000.00	24.33	2580.36	-1.3	861.127	26.54	NP_666077.2 lcl|GPHN_4:8-2326_ORF1_GPHN_4:7:2325, XP_006515962.1, XP_006515963.1, XP_006515964.1, XP_006515965.1, XP_006515966.1, XP_006515967.1, XP_006515968.1 lcl|GPHN_38:8-2365_ORF1_GPHN_38:7:2364, XP_006515969.1 lcl|GPHN_3:8-2257_ORF1_GPHN_3:7:2256, XP_006515970.1 lcl|GPHN_1:8-2218_ORF1_GPHN_1:7:2217, XP_017170562.1, XP_017170563.1, XP_017170564.1, XP_017170565.1 lcl|GPHN_29:8-2323_ORF1_GPHN_…
ANGLLMLPPKTEQYVELHKGEVVDV	ANGLLM(+15.99)LPPKTEQYVELHKGEVVDV	M6:Oxidation (M):1000.00	18.86	2794.46	-1.5	699.621	27.52	NP_666077.2 lcl|GPHN_4:8-2326_ORF1_GPHN_4:7:2325, XP_006515962.1, XP_006515963.1, XP_006515964.1, XP_006515965.1, XP_006515966.1, XP_006515967.1, XP_006515968.1 lcl|GPHN_38:8-2365_ORF1_GPHN_38:7:2364, XP_006515969.1 lcl|GPHN_3:8-2257_ORF1_GPHN_3:7:2256, XP_006515970.1 lcl|GPHN_1:8-2218_ORF1_GPHN_1:7:2217, XP_017170562.1, XP_017170563.1, XP_017170564.1, XP_017170565.1 lcl|GPHN_29:8-2323_ORF1_GPHN_…
ANHGQPIPG	A(+42.01)NHGQPIPG	A1:Acetylation (Protein N-term):1000.00	23.35	931.451	-0.7	466.733	17.23	NP_666077.2 lcl|GPHN_4:8-2326_ORF1_GPHN_4:7:2325, XP_006515962.1, XP_006515963.1, XP_006515964.1, XP_006515965.1, XP_006515968.1 lcl|GPHN_38:8-2365_ORF1_GPHN_38:7:2364, XP_017170562.1, XP_017170563.1, XP_017170564.1, lcl|GPHN_101:8-994_ORF2_GPHN_101:7:993, lcl|GPHN_105:73-2247_ORF1_GPHN_105:72:2246, lcl|GPHN_119:441-2183_ORF3_GPHN_119:440:2182, lcl|GPHN_121:8-2368_ORF1_GPHN_121:7:2367, lcl|GPHN_1…
ANHGQPIPGL	ANHGQPIPGL		27.62	1002.52	-0.6	502.269	22.55	NP_666077.2 lcl|GPHN_4:8-2326_ORF1_GPHN_4:7:2325, XP_006515962.1, XP_006515963.1, XP_006515964.1, XP_006515965.1, XP_006515968.1 lcl|GPHN_38:8-2365_ORF1_GPHN_38:7:2364, XP_017170562.1, XP_017170563.1, XP_017170564.1, lcl|GPHN_101:8-994_ORF2_GPHN_101:7:993, lcl|GPHN_105:73-2247_ORF1_GPHN_105:72:2246, lcl|GPHN_119:441-2183_ORF3_GPHN_119:440:2182, lcl|GPHN_121:8-2368_ORF1_GPHN_121:7:2367, lcl|GPHN_1…
ANHGQPIPGLI	ANHGQPIPGLI		28.68	1115.61	-1.1	558.811	25.39	NP_666077.2 lcl|GPHN_4:8-2326_ORF1_GPHN_4:7:2325, XP_006515962.1, XP_006515963.1, XP_006515964.1, XP_006515965.1, XP_006515968.1 lcl|GPHN_38:8-2365_ORF1_GPHN_38:7:2364, XP_017170562.1, XP_017170563.1, XP_017170564.1, lcl|GPHN_101:8-994_ORF2_GPHN_101:7:993, lcl|GPHN_105:73-2247_ORF1_GPHN_105:72:2246, lcl|GPHN_119:441-2183_ORF3_GPHN_119:440:2182, lcl|GPHN_121:8-2368_ORF1_GPHN_121:7:2367, lcl|GPHN_1…
ANHGQPIPGLIS	ANHGQPIPGLIS		27.01	1202.64	-0.7	602.327	24.31	NP_666077.2 lcl|GPHN_4:8-2326_ORF1_GPHN_4:7:2325, XP_006515962.1, XP_006515963.1, XP_006515964.1, XP_006515965.1, XP_006515968.1 lcl|GPHN_38:8-2365_ORF1_GPHN_38:7:2364, XP_017170562.1, XP_017170563.1, XP_017170564.1, lcl|GPHN_101:8-994_ORF2_GPHN_101:7:993, lcl|GPHN_105:73-2247_ORF1_GPHN_105:72:2246, lcl|GPHN_119:441-2183_ORF3_GPHN_119:440:2182, lcl|GPHN_121:8-2368_ORF1_GPHN_121:7:2367, lcl|GPHN_1…
ANHGQPIPGLISY	ANHGQPIPGLISY		28.06	1365.7	-1	683.859	27	NP_666077.2 lcl|GPHN_4:8-2326_ORF1_GPHN_4:7:2325, XP_006515962.1, XP_006515963.1, XP_006515964.1, XP_006515965.1, XP_006515968.1 lcl|GPHN_38:8-2365_ORF1_GPHN_38:7:2364, XP_017170562.1, XP_017170563.1, XP_017170564.1, lcl|GPHN_101:8-994_ORF2_GPHN_101:7:993, lcl|GPHN_105:73-2247_ORF1_GPHN_105:72:2246, lcl|GPHN_119:441-2183_ORF3_GPHN_119:440:2182, lcl|GPHN_121:8-2368_ORF1_GPHN_121:7:2367, lcl|GPHN_1…
APRDVTPEAT	APRDVTPEAT		30.54	1055.52	1	528.77	15.9	NP_666077.2 lcl|GPHN_4:8-2326_ORF1_GPHN_4:7:2325, XP_006515962.1, XP_006515967.1, XP_006515970.1 lcl|GPHN_1:8-2218_ORF1_GPHN_1:7:2217, XP_017170564.1, XP_017170565.1 lcl|GPHN_29:8-2323_ORF1_GPHN_29:7:2322, XP_017170567.1, XP_030102591.1 lcl|GPHN_8:8-2281_ORF1_GPHN_8:7:2280, XP_030102593.1 lcl|GPHN_2:8-1945_ORF1_GPHN_2:7:1944, lcl|GPHN_101:8-994_ORF2_GPHN_101:7:993, lcl|GPHN_102:8-943_ORF2_GPHN_10…
APRDVTPEATK	APRDVTPEATK		34.27	1183.62	-1.1	395.547	13.72	NP_666077.2 lcl|GPHN_4:8-2326_ORF1_GPHN_4:7:2325, XP_006515962.1, XP_006515967.1, XP_006515970.1 lcl|GPHN_1:8-2218_ORF1_GPHN_1:7:2217, XP_017170564.1, XP_017170565.1 lcl|GPHN_29:8-2323_ORF1_GPHN_29:7:2322, XP_017170567.1, XP_030102591.1 lcl|GPHN_8:8-2281_ORF1_GPHN_8:7:2280, XP_030102593.1 lcl|GPHN_2:8-1945_ORF1_GPHN_2:7:1944, lcl|GPHN_101:8-994_ORF2_GPHN_101:7:993, lcl|GPHN_102:8-943_ORF2_GPHN_10…
APRDVTPEATKE	APRDVTPEATKE		29.06	1312.66	0.9	438.562	14.54	NP_666077.2 lcl|GPHN_4:8-2326_ORF1_GPHN_4:7:2325, XP_006515962.1, XP_006515967.1, XP_006515970.1 lcl|GPHN_1:8-2218_ORF1_GPHN_1:7:2217, XP_017170564.1, XP_017170565.1 lcl|GPHN_29:8-2323_ORF1_GPHN_29:7:2322, XP_017170567.1, XP_030102591.1 lcl|GPHN_8:8-2281_ORF1_GPHN_8:7:2280, XP_030102593.1 lcl|GPHN_2:8-1945_ORF1_GPHN_2:7:1944, lcl|GPHN_101:8-994_ORF2_GPHN_101:7:993, lcl|GPHN_102:8-943_ORF2_GPHN_10…
APRDVTPEATKEVIE	APRDVTPEATKEVIE		41.72	1653.86	0.3	552.293	19.91	NP_666077.2 lcl|GPHN_4:8-2326_ORF1_GPHN_4:7:2325, XP_006515962.1, XP_006515967.1, XP_006515970.1 lcl|GPHN_1:8-2218_ORF1_GPHN_1:7:2217, XP_017170564.1, XP_017170565.1 lcl|GPHN_29:8-2323_ORF1_GPHN_29:7:2322, XP_017170567.1, XP_030102591.1 lcl|GPHN_8:8-2281_ORF1_GPHN_8:7:2280, XP_030102593.1 lcl|GPHN_2:8-1945_ORF1_GPHN_2:7:1944, lcl|GPHN_101:8-994_ORF2_GPHN_101:7:993, lcl|GPHN_102:8-943_ORF2_GPHN_10…
APRDVTPEATKEVIEREAPG	APRDVTPEATKEVIEREAPG		33.78	2164.11	0.5	542.036	21.33	NP_666077.2 lcl|GPHN_4:8-2326_ORF1_GPHN_4:7:2325, XP_006515962.1, XP_006515967.1, XP_006515970.1 lcl|GPHN_1:8-2218_ORF1_GPHN_1:7:2217, XP_017170564.1, XP_017170565.1 lcl|GPHN_29:8-2323_ORF1_GPHN_29:7:2322, XP_017170567.1, XP_030102591.1 lcl|GPHN_8:8-2281_ORF1_GPHN_8:7:2280, XP_030102593.1 lcl|GPHN_2:8-1945_ORF1_GPHN_2:7:1944, lcl|GPHN_101:8-994_ORF2_GPHN_101:7:993, lcl|GPHN_102:8-943_ORF2_GPHN_10…
AQATSRLSTASCPTPK	AQATSRLS(+79.97)TASC(+57.02)PTPK	S8:Phosphorylation (STY):9.34;C12:Carbamidomethylation:1000.00	57.96	1754.8	-1.3	878.407	17.18	NP_666077.2 lcl|GPHN_4:8-2326_ORF1_GPHN_4:7:2325, XP_006515962.1, XP_006515963.1, XP_006515964.1, XP_006515965.1, XP_006515966.1, XP_006515967.1, XP_006515968.1 lcl|GPHN_38:8-2365_ORF1_GPHN_38:7:2364, XP_006515969.1 lcl|GPHN_3:8-2257_ORF1_GPHN_3:7:2256, XP_006515970.1 lcl|GPHN_1:8-2218_ORF1_GPHN_1:7:2217, XP_017170562.1, XP_017170563.1, XP_017170564.1, XP_017170565.1 lcl|GPHN_29:8-2323_ORF1_GPHN_…
AQATSRLSTASCPTPK	AQATSRLSTASC(+57.02)PTPK	C12:Carbamidomethylation:1000.00	25.32	1674.84	3	559.288	15.63	NP_666077.2 lcl|GPHN_4:8-2326_ORF1_GPHN_4:7:2325, XP_006515962.1, XP_006515963.1, XP_006515964.1, XP_006515965.1, XP_006515966.1, XP_006515967.1, XP_006515968.1 lcl|GPHN_38:8-2365_ORF1_GPHN_38:7:2364, XP_006515969.1 lcl|GPHN_3:8-2257_ORF1_GPHN_3:7:2256, XP_006515970.1 lcl|GPHN_1:8-2218_ORF1_GPHN_1:7:2217, XP_017170562.1, XP_017170563.1, XP_017170564.1, XP_017170565.1 lcl|GPHN_29:8-2323_ORF1_GPHN_…
AQATSRLSTASCPTPK	AQATSRLST(+79.97)AS(+79.97)C(+57.02)PTPK	T9:Phosphorylation (STY):0.00;S11:Phosphorylation (STY):0.00;C12:Carbamidomethylation:1000.00	24.31	1834.77	-0.2	612.597	18.57	NP_666077.2 lcl|GPHN_4:8-2326_ORF1_GPHN_4:7:2325, XP_006515962.1, XP_006515963.1, XP_006515964.1, XP_006515965.1, XP_006515966.1, XP_006515967.1, XP_006515968.1 lcl|GPHN_38:8-2365_ORF1_GPHN_38:7:2364, XP_006515969.1 lcl|GPHN_3:8-2257_ORF1_GPHN_3:7:2256, XP_006515970.1 lcl|GPHN_1:8-2218_ORF1_GPHN_1:7:2217, XP_017170562.1, XP_017170563.1, XP_017170564.1, XP_017170565.1 lcl|GPHN_29:8-2323_ORF1_GPHN_…
AQATSRLSTASCPTPK	AQATSRLST(+79.97)ASC(+57.02)PTPK	T9:Phosphorylation (STY):0.00;C12:Carbamidomethylation:1000.00	22.01	1754.8	-1.1	878.408	17.14	NP_666077.2 lcl|GPHN_4:8-2326_ORF1_GPHN_4:7:2325, XP_006515962.1, XP_006515963.1, XP_006515964.1, XP_006515965.1, XP_006515966.1, XP_006515967.1, XP_006515968.1 lcl|GPHN_38:8-2365_ORF1_GPHN_38:7:2364, XP_006515969.1 lcl|GPHN_3:8-2257_ORF1_GPHN_3:7:2256, XP_006515970.1 lcl|GPHN_1:8-2218_ORF1_GPHN_1:7:2217, XP_017170562.1, XP_017170563.1, XP_017170564.1, XP_017170565.1 lcl|GPHN_29:8-2323_ORF1_GPHN_…
AQATSRLSTASCPTPK	AQATSRLST(+79.97)ASC(+57.02)PT(+79.97)PK	T9:Phosphorylation (STY):0.00;C12:Carbamidomethylation:1000.00;T14:Phosphorylation (STY):0.00	18.96	1834.77	-0.1	918.391	18.59	NP_666077.2 lcl|GPHN_4:8-2326_ORF1_GPHN_4:7:2325, XP_006515962.1, XP_006515963.1, XP_006515964.1, XP_006515965.1, XP_006515966.1, XP_006515967.1, XP_006515968.1 lcl|GPHN_38:8-2365_ORF1_GPHN_38:7:2364, XP_006515969.1 lcl|GPHN_3:8-2257_ORF1_GPHN_3:7:2256, XP_006515970.1 lcl|GPHN_1:8-2218_ORF1_GPHN_1:7:2217, XP_017170562.1, XP_017170563.1, XP_017170564.1, XP_017170565.1 lcl|GPHN_29:8-2323_ORF1_GPHN_…
AQDVYAKDNLPPFPA	AQDVYAKDNLPPFPA		51.11	1644.81	0.7	823.415	27.57	NP_666077.2 lcl|GPHN_4:8-2326_ORF1_GPHN_4:7:2325, XP_006515962.1, XP_006515963.1, XP_006515964.1, XP_006515965.1, XP_006515966.1, XP_006515967.1, XP_006515968.1 lcl|GPHN_38:8-2365_ORF1_GPHN_38:7:2364, XP_006515969.1 lcl|GPHN_3:8-2257_ORF1_GPHN_3:7:2256, XP_006515970.1 lcl|GPHN_1:8-2218_ORF1_GPHN_1:7:2217, XP_017170562.1, XP_017170563.1, XP_017170564.1, XP_017170565.1 lcl|GPHN_29:8-2323_ORF1_GPHN_…
AQDVYAKDNLPPFPAS	AQDVYAKDNLPPFPAS		20.47	1731.85	1.6	866.932	26.9	NP_666077.2 lcl|GPHN_4:8-2326_ORF1_GPHN_4:7:2325, XP_006515962.1, XP_006515963.1, XP_006515964.1, XP_006515965.1, XP_006515966.1, XP_006515967.1, XP_006515968.1 lcl|GPHN_38:8-2365_ORF1_GPHN_38:7:2364, XP_006515969.1 lcl|GPHN_3:8-2257_ORF1_GPHN_3:7:2256, XP_006515970.1 lcl|GPHN_1:8-2218_ORF1_GPHN_1:7:2217, XP_017170562.1, XP_017170563.1, XP_017170564.1, XP_017170565.1 lcl|GPHN_29:8-2323_ORF1_GPHN_…
AQDVYAKDNLPPFPASVK	AQDVYAKDNLPPFPASVK		43.16	1959.01	1.6	654.012	24.79	NP_666077.2 lcl|GPHN_4:8-2326_ORF1_GPHN_4:7:2325, XP_006515962.1, XP_006515963.1, XP_006515964.1, XP_006515965.1, XP_006515966.1, XP_006515967.1, XP_006515968.1 lcl|GPHN_38:8-2365_ORF1_GPHN_38:7:2364, XP_006515969.1 lcl|GPHN_3:8-2257_ORF1_GPHN_3:7:2256, XP_006515970.1 lcl|GPHN_1:8-2218_ORF1_GPHN_1:7:2217, XP_017170562.1, XP_017170563.1, XP_017170564.1, XP_017170565.1 lcl|GPHN_29:8-2323_ORF1_GPHN_…
ARLPSCSST	ARLPSC(+57.02)SST	C6:Carbamidomethylation:1000.00	26.84	977.46	-1.8	489.736	15.57	XP_006515962.1, XP_006515964.1, XP_006515966.1, XP_006515967.1, XP_017170562.1, XP_017170565.1 lcl|GPHN_29:8-2323_ORF1_GPHN_29:7:2322, XP_017170568.1, lcl|GPHN_109:8-2362_ORF1_GPHN_109:7:2361, lcl|GPHN_117:8-2179_ORF1_GPHN_117:7:2178, lcl|GPHN_118:8-1849_ORF1_GPHN_118:7:1848, lcl|GPHN_120:8-2125_ORF1_GPHN_120:7:2124, lcl|GPHN_121:8-2368_ORF1_GPHN_121:7:2367, lcl|GPHN_123:8-2149_ORF1_GPHN_123:7:21…
ARLPSCSSTYS	ARLPSC(+57.02)SSTYS	C6:Carbamidomethylation:1000.00	30.53	1227.56	0.3	614.785	18.03	XP_006515962.1, XP_006515964.1, XP_006515966.1, XP_006515967.1, XP_017170562.1, XP_017170565.1 lcl|GPHN_29:8-2323_ORF1_GPHN_29:7:2322, XP_017170568.1, lcl|GPHN_109:8-2362_ORF1_GPHN_109:7:2361, lcl|GPHN_117:8-2179_ORF1_GPHN_117:7:2178, lcl|GPHN_118:8-1849_ORF1_GPHN_118:7:1848, lcl|GPHN_120:8-2125_ORF1_GPHN_120:7:2124, lcl|GPHN_121:8-2368_ORF1_GPHN_121:7:2367, lcl|GPHN_123:8-2149_ORF1_GPHN_123:7:21…
ARLPSCSSTYS	ARLPS(+79.97)C(+57.02)SSTYS	S5:Phosphorylation (STY):0.00;C6:Carbamidomethylation:1000.00	19.94	1307.52	1.1	654.769	20.84	XP_006515962.1, XP_006515964.1, XP_006515966.1, XP_006515967.1, XP_017170562.1, XP_017170565.1 lcl|GPHN_29:8-2323_ORF1_GPHN_29:7:2322, XP_017170568.1, lcl|GPHN_109:8-2362_ORF1_GPHN_109:7:2361, lcl|GPHN_117:8-2179_ORF1_GPHN_117:7:2178, lcl|GPHN_118:8-1849_ORF1_GPHN_118:7:1848, lcl|GPHN_120:8-2125_ORF1_GPHN_120:7:2124, lcl|GPHN_121:8-2368_ORF1_GPHN_121:7:2367, lcl|GPHN_123:8-2149_ORF1_GPHN_123:7:21…
ARLPSCSSTYSVSELHSR	ARLPSC(+57.02)SSTYSVSELHSR	C6:Carbamidomethylation:1000.00	44.4	2035.97	-1.9	510	19.51	XP_006515962.1, XP_006515964.1, XP_006515966.1, XP_006515967.1, XP_017170562.1, XP_017170565.1 lcl|GPHN_29:8-2323_ORF1_GPHN_29:7:2322, XP_017170568.1, lcl|GPHN_109:8-2362_ORF1_GPHN_109:7:2361, lcl|GPHN_123:8-2149_ORF1_GPHN_123:7:2148, lcl|GPHN_130:8-1864_ORF1_GPHN_130:7:1863, lcl|GPHN_162:8-2323_ORF1_GPHN_162:7:2322, lcl|GPHN_198:8-1459_ORF1_GPHN_198:7:1458, lcl|GPHN_200:8-2188_ORF1_GPHN_200:7:21…
ARLPSCSSTYSVSEVQSR	ARLPSC(+57.02)SSTYSVSEVQSR	C6:Carbamidomethylation:1000.00	50.13	2012.96	1.6	671.995	20.11	lcl|GPHN_117:8-2179_ORF1_GPHN_117:7:2178, lcl|GPHN_118:8-1849_ORF1_GPHN_118:7:1848, lcl|GPHN_120:8-2125_ORF1_GPHN_120:7:2124, lcl|GPHN_121:8-2368_ORF1_GPHN_121:7:2367, lcl|GPHN_136:8-2164_ORF1_GPHN_136:7:2163, lcl|GPHN_138:8-2026_ORF1_GPHN_138:7:2025, lcl|GPHN_169:441-2216_ORF3_GPHN_169:440:2215, lcl|GPHN_207:8-1867_ORF1_GPHN_207:7:1866, lcl|GPHN_213:8-1963_ORF1_GPHN_213:7:1962, lcl|GPHN_23:8-235…
ARPGQDIRP	ARPGQDIRP		26.99	1008.55	0.8	505.281	14.62	NP_666077.2 lcl|GPHN_4:8-2326_ORF1_GPHN_4:7:2325, XP_006515962.1, XP_006515963.1, XP_006515964.1, XP_006515965.1, XP_006515966.1, XP_006515967.1, XP_006515968.1 lcl|GPHN_38:8-2365_ORF1_GPHN_38:7:2364, XP_006515969.1 lcl|GPHN_3:8-2257_ORF1_GPHN_3:7:2256, XP_006515970.1 lcl|GPHN_1:8-2218_ORF1_GPHN_1:7:2217, XP_017170562.1, XP_017170563.1, XP_017170564.1, XP_017170565.1 lcl|GPHN_29:8-2323_ORF1_GPHN_…
ARPGQDIRPI	ARPGQDIRPI		27.73	1121.63	-0.7	561.822	17.57	NP_666077.2 lcl|GPHN_4:8-2326_ORF1_GPHN_4:7:2325, XP_006515962.1, XP_006515963.1, XP_006515964.1, XP_006515965.1, XP_006515966.1, XP_006515967.1, XP_006515968.1 lcl|GPHN_38:8-2365_ORF1_GPHN_38:7:2364, XP_006515969.1 lcl|GPHN_3:8-2257_ORF1_GPHN_3:7:2256, XP_006515970.1 lcl|GPHN_1:8-2218_ORF1_GPHN_1:7:2217, XP_017170562.1, XP_017170563.1, XP_017170564.1, XP_017170565.1 lcl|GPHN_29:8-2323_ORF1_GPHN_…
ARPGQDIRPIG	ARPGQDIRPIG		34.75	1178.65	2.4	590.335	17.25	NP_666077.2 lcl|GPHN_4:8-2326_ORF1_GPHN_4:7:2325, XP_006515962.1, XP_006515963.1, XP_006515964.1, XP_006515965.1, XP_006515966.1, XP_006515967.1, XP_006515968.1 lcl|GPHN_38:8-2365_ORF1_GPHN_38:7:2364, XP_006515969.1 lcl|GPHN_3:8-2257_ORF1_GPHN_3:7:2256, XP_006515970.1 lcl|GPHN_1:8-2218_ORF1_GPHN_1:7:2217, XP_017170562.1, XP_017170563.1, XP_017170564.1, XP_017170565.1 lcl|GPHN_29:8-2323_ORF1_GPHN_…
ARPGQDIRPIGH	ARPGQDIRPIGH		38	1315.71	-0.3	439.577	15.4	NP_666077.2 lcl|GPHN_4:8-2326_ORF1_GPHN_4:7:2325, XP_006515962.1, XP_006515963.1, XP_006515964.1, XP_006515965.1, XP_006515966.1, XP_006515967.1, XP_006515968.1 lcl|GPHN_38:8-2365_ORF1_GPHN_38:7:2364, XP_006515969.1 lcl|GPHN_3:8-2257_ORF1_GPHN_3:7:2256, XP_006515970.1 lcl|GPHN_1:8-2218_ORF1_GPHN_1:7:2217, XP_017170562.1, XP_017170563.1, XP_017170564.1, XP_017170565.1 lcl|GPHN_29:8-2323_ORF1_GPHN_…
ARPGQDIRPIGHDIK	ARPGQDIRPIGHDIK		44.78	1671.92	0.1	418.986	16.65	NP_666077.2 lcl|GPHN_4:8-2326_ORF1_GPHN_4:7:2325, XP_006515962.1, XP_006515963.1, XP_006515964.1, XP_006515965.1, XP_006515966.1, XP_006515967.1, XP_006515968.1 lcl|GPHN_38:8-2365_ORF1_GPHN_38:7:2364, XP_006515969.1 lcl|GPHN_3:8-2257_ORF1_GPHN_3:7:2256, XP_006515970.1 lcl|GPHN_1:8-2218_ORF1_GPHN_1:7:2217, XP_017170562.1, XP_017170563.1, XP_017170564.1, XP_017170565.1 lcl|GPHN_29:8-2323_ORF1_GPHN_…
ASCPTPK	ASC(+57.02)PTPK	C3:Carbamidomethylation:1000.00	19.88	759.359	-0.2	380.687	11.1	NP_666077.2 lcl|GPHN_4:8-2326_ORF1_GPHN_4:7:2325, XP_006515962.1, XP_006515963.1, XP_006515964.1, XP_006515965.1, XP_006515966.1, XP_006515967.1, XP_006515968.1 lcl|GPHN_38:8-2365_ORF1_GPHN_38:7:2364, XP_006515969.1 lcl|GPHN_3:8-2257_ORF1_GPHN_3:7:2256, XP_006515970.1 lcl|GPHN_1:8-2218_ORF1_GPHN_1:7:2217, XP_017170562.1, XP_017170563.1, XP_017170564.1, XP_017170565.1 lcl|GPHN_29:8-2323_ORF1_GPHN_…
ASCPTPKARLPS	ASC(+57.02)PTPKARLPS	C3:Carbamidomethylation:1000.00	24.38	1283.67	-1	428.895	16.36	XP_017170562.1, XP_017170565.1 lcl|GPHN_29:8-2323_ORF1_GPHN_29:7:2322, lcl|GPHN_109:8-2362_ORF1_GPHN_109:7:2361, lcl|GPHN_118:8-1849_ORF1_GPHN_118:7:1848, lcl|GPHN_121:8-2368_ORF1_GPHN_121:7:2367, lcl|GPHN_198:8-1459_ORF1_GPHN_198:7:1458, lcl|GPHN_205:82-1992_ORF1_GPHN_205:81:1991, lcl|GPHN_208:8-934_ORF1_GPHN_208:7:933, lcl|GPHN_256:201-2186_ORF1_GPHN_256:200:2185, lcl|GPHN_262:8-1936_ORF1_GPHN_…
ASCPTPKLH	ASC(+57.02)PTPKLH	C3:Carbamidomethylation:1000.00	32.54	1009.5	-0.8	505.758	14.79	XP_017170563.1, XP_030102590.1 lcl|GPHN_41:8-2320_ORF1_GPHN_41:7:2319, XP_030102591.1 lcl|GPHN_8:8-2281_ORF1_GPHN_8:7:2280, XP_030102592.1, lcl|GPHN_131:8-1846_ORF1_GPHN_131:7:1845, lcl|GPHN_133:201-2144_ORF1_GPHN_133:200:2143, lcl|GPHN_137:8-2062_ORF1_GPHN_137:7:2061, lcl|GPHN_145:8-2143_ORF1_GPHN_145:7:2142, lcl|GPHN_149:8-2227_ORF1_GPHN_149:7:2226, lcl|GPHN_187:73-2202_ORF1_GPHN_187:72:2201, l…
ASCPTPKQI	ASC(+57.02)PTPKQI	C3:Carbamidomethylation:1000.00	33.08	1000.5	0.4	501.258	16.64	XP_006515962.1, XP_006515963.1, XP_006515964.1, XP_006515965.1, XP_006515966.1, XP_006515967.1, XP_017170564.1, XP_017170566.1, XP_017170567.1, XP_017170568.1, lcl|GPHN_103:8-2287_ORF1_GPHN_103:7:2286, lcl|GPHN_117:8-2179_ORF1_GPHN_117:7:2178, lcl|GPHN_120:8-2125_ORF1_GPHN_120:7:2124, lcl|GPHN_123:8-2149_ORF1_GPHN_123:7:2148, lcl|GPHN_12:8-2380_ORF1_GPHN_12:7:2379, lcl|GPHN_130:8-1864_ORF1_GPHN_1…
ASCPTPKQIR	ASC(+57.02)PTPKQIR	C3:Carbamidomethylation:1000.00	30.28	1156.6	-1.1	386.541	14.03	XP_006515962.1, XP_006515963.1, XP_006515964.1, XP_006515965.1, XP_006515966.1, XP_006515967.1, XP_017170564.1, XP_017170566.1, XP_017170567.1, XP_017170568.1, lcl|GPHN_103:8-2287_ORF1_GPHN_103:7:2286, lcl|GPHN_117:8-2179_ORF1_GPHN_117:7:2178, lcl|GPHN_120:8-2125_ORF1_GPHN_120:7:2124, lcl|GPHN_123:8-2149_ORF1_GPHN_123:7:2148, lcl|GPHN_12:8-2380_ORF1_GPHN_12:7:2379, lcl|GPHN_130:8-1864_ORF1_GPHN_1…
ASCPTPKVQ	ASC(+57.02)PTPKVQ	C3:Carbamidomethylation:1000.00	26.19	986.486	-1.4	494.249	15.61	NP_666077.2 lcl|GPHN_4:8-2326_ORF1_GPHN_4:7:2325, XP_006515968.1 lcl|GPHN_38:8-2365_ORF1_GPHN_38:7:2364, XP_006515969.1 lcl|GPHN_3:8-2257_ORF1_GPHN_3:7:2256, XP_006515970.1 lcl|GPHN_1:8-2218_ORF1_GPHN_1:7:2217, XP_030102593.1 lcl|GPHN_2:8-1945_ORF1_GPHN_2:7:1944, lcl|GPHN_104:441-1244_ORF3_GPHN_104:440:1243, lcl|GPHN_105:73-2247_ORF1_GPHN_105:72:2246, lcl|GPHN_111:82-2160_ORF1_GPHN_111:81:2159, l…
ASCPTPKVQ	AS(+79.97)C(+57.02)PTPKVQ	S2:Phosphorylation (STY):22.45;C3:Carbamidomethylation:1000.00	25.5	1066.45	1.1	534.234	17.64	NP_666077.2 lcl|GPHN_4:8-2326_ORF1_GPHN_4:7:2325, XP_006515968.1 lcl|GPHN_38:8-2365_ORF1_GPHN_38:7:2364, XP_006515969.1 lcl|GPHN_3:8-2257_ORF1_GPHN_3:7:2256, XP_006515970.1 lcl|GPHN_1:8-2218_ORF1_GPHN_1:7:2217, XP_030102593.1 lcl|GPHN_2:8-1945_ORF1_GPHN_2:7:1944, lcl|GPHN_104:441-1244_ORF3_GPHN_104:440:1243, lcl|GPHN_105:73-2247_ORF1_GPHN_105:72:2246, lcl|GPHN_111:82-2160_ORF1_GPHN_111:81:2159, l…
ASCPTPKVQ	ASC(+57.02)PT(+79.97)PKVQ	C3:Carbamidomethylation:1000.00;T5:Phosphorylation (STY):37.54	23.8	1066.45	-2.3	534.232	16.68	NP_666077.2 lcl|GPHN_4:8-2326_ORF1_GPHN_4:7:2325, XP_006515968.1 lcl|GPHN_38:8-2365_ORF1_GPHN_38:7:2364, XP_006515969.1 lcl|GPHN_3:8-2257_ORF1_GPHN_3:7:2256, XP_006515970.1 lcl|GPHN_1:8-2218_ORF1_GPHN_1:7:2217, XP_030102593.1 lcl|GPHN_2:8-1945_ORF1_GPHN_2:7:1944, lcl|GPHN_104:441-1244_ORF3_GPHN_104:440:1243, lcl|GPHN_105:73-2247_ORF1_GPHN_105:72:2246, lcl|GPHN_111:82-2160_ORF1_GPHN_111:81:2159, l…
ASCPTPKVQSR	ASC(+57.02)PTPKVQSR	C3:Carbamidomethylation:1000.00	20.57	1229.62	-1.9	410.879	13.41	NP_666077.2 lcl|GPHN_4:8-2326_ORF1_GPHN_4:7:2325, XP_006515968.1 lcl|GPHN_38:8-2365_ORF1_GPHN_38:7:2364, XP_006515969.1 lcl|GPHN_3:8-2257_ORF1_GPHN_3:7:2256, XP_006515970.1 lcl|GPHN_1:8-2218_ORF1_GPHN_1:7:2217, XP_030102593.1 lcl|GPHN_2:8-1945_ORF1_GPHN_2:7:1944, lcl|GPHN_104:441-1244_ORF3_GPHN_104:440:1243, lcl|GPHN_105:73-2247_ORF1_GPHN_105:72:2246, lcl|GPHN_111:82-2160_ORF1_GPHN_111:81:2159, l…
ASCPTPKVQSRC	ASC(+57.02)PTPKVQSRC(+57.02)	C3:Carbamidomethylation:1000.00;C12:Carbamidomethylation:1000.00	27.09	1389.65	-0.8	464.223	13.97	NP_666077.2 lcl|GPHN_4:8-2326_ORF1_GPHN_4:7:2325, XP_006515968.1 lcl|GPHN_38:8-2365_ORF1_GPHN_38:7:2364, XP_006515969.1 lcl|GPHN_3:8-2257_ORF1_GPHN_3:7:2256, XP_006515970.1 lcl|GPHN_1:8-2218_ORF1_GPHN_1:7:2217, XP_030102593.1 lcl|GPHN_2:8-1945_ORF1_GPHN_2:7:1944, lcl|GPHN_104:441-1244_ORF3_GPHN_104:440:1243, lcl|GPHN_105:73-2247_ORF1_GPHN_105:72:2246, lcl|GPHN_111:82-2160_ORF1_GPHN_111:81:2159, l…
ASHSAVDIT	ASHSAVDIT		27.09	899.435	-0.3	450.724	16.84	NP_666077.2 lcl|GPHN_4:8-2326_ORF1_GPHN_4:7:2325, XP_006515962.1, XP_006515963.1, XP_006515964.1, XP_006515965.1, XP_006515966.1, XP_006515967.1, XP_006515968.1 lcl|GPHN_38:8-2365_ORF1_GPHN_38:7:2364, XP_006515969.1 lcl|GPHN_3:8-2257_ORF1_GPHN_3:7:2256, XP_006515970.1 lcl|GPHN_1:8-2218_ORF1_GPHN_1:7:2217, XP_017170562.1, XP_017170563.1, XP_017170564.1, XP_017170565.1 lcl|GPHN_29:8-2323_ORF1_GPHN_…
ASHSAVDITK	ASHS(+79.97)AVDITK	S4:Phosphorylation (STY):60.92	37.54	1107.5	1.3	554.756	15.7	NP_666077.2 lcl|GPHN_4:8-2326_ORF1_GPHN_4:7:2325, XP_006515962.1, XP_006515963.1, XP_006515964.1, XP_006515965.1, XP_006515966.1, XP_006515967.1, XP_006515968.1 lcl|GPHN_38:8-2365_ORF1_GPHN_38:7:2364, XP_006515969.1 lcl|GPHN_3:8-2257_ORF1_GPHN_3:7:2256, XP_006515970.1 lcl|GPHN_1:8-2218_ORF1_GPHN_1:7:2217, XP_017170562.1, XP_017170563.1, XP_017170564.1, XP_017170565.1 lcl|GPHN_29:8-2323_ORF1_GPHN_…
ASHSAVDITK	ASHSAVDITK		35.94	1027.53	0.6	514.773	14.14	NP_666077.2 lcl|GPHN_4:8-2326_ORF1_GPHN_4:7:2325, XP_006515962.1, XP_006515963.1, XP_006515964.1, XP_006515965.1, XP_006515966.1, XP_006515967.1, XP_006515968.1 lcl|GPHN_38:8-2365_ORF1_GPHN_38:7:2364, XP_006515969.1 lcl|GPHN_3:8-2257_ORF1_GPHN_3:7:2256, XP_006515970.1 lcl|GPHN_1:8-2218_ORF1_GPHN_1:7:2217, XP_017170562.1, XP_017170563.1, XP_017170564.1, XP_017170565.1 lcl|GPHN_29:8-2323_ORF1_GPHN_…
ASHSAVDITKVA	ASHSAVDITKVA		40.46	1197.64	0.4	599.825	18.95	NP_666077.2 lcl|GPHN_4:8-2326_ORF1_GPHN_4:7:2325, XP_006515962.1, XP_006515963.1, XP_006515964.1, XP_006515965.1, XP_006515966.1, XP_006515967.1, XP_006515968.1 lcl|GPHN_38:8-2365_ORF1_GPHN_38:7:2364, XP_006515969.1 lcl|GPHN_3:8-2257_ORF1_GPHN_3:7:2256, XP_006515970.1 lcl|GPHN_1:8-2218_ORF1_GPHN_1:7:2217, XP_017170562.1, XP_017170563.1, XP_017170564.1, XP_017170565.1 lcl|GPHN_29:8-2323_ORF1_GPHN_…
ASHSAVDITKVA	ASHS(+79.97)AVDITKVA	S4:Phosphorylation (STY):17.01	36.57	1277.6	0.8	639.809	21.27	NP_666077.2 lcl|GPHN_4:8-2326_ORF1_GPHN_4:7:2325, XP_006515962.1, XP_006515963.1, XP_006515964.1, XP_006515965.1, XP_006515966.1, XP_006515967.1, XP_006515968.1 lcl|GPHN_38:8-2365_ORF1_GPHN_38:7:2364, XP_006515969.1 lcl|GPHN_3:8-2257_ORF1_GPHN_3:7:2256, XP_006515970.1 lcl|GPHN_1:8-2218_ORF1_GPHN_1:7:2217, XP_017170562.1, XP_017170563.1, XP_017170564.1, XP_017170565.1 lcl|GPHN_29:8-2323_ORF1_GPHN_…
ASHSAVDITKVAR	ASHSAVDITKVAR		40.9	1353.74	0.7	452.253	16.82	NP_666077.2 lcl|GPHN_4:8-2326_ORF1_GPHN_4:7:2325, XP_006515962.1, XP_006515963.1, XP_006515964.1, XP_006515965.1, XP_006515966.1, XP_006515967.1, XP_006515968.1 lcl|GPHN_38:8-2365_ORF1_GPHN_38:7:2364, XP_006515969.1 lcl|GPHN_3:8-2257_ORF1_GPHN_3:7:2256, XP_006515970.1 lcl|GPHN_1:8-2218_ORF1_GPHN_1:7:2217, XP_017170562.1, XP_017170563.1, XP_017170564.1, XP_017170565.1 lcl|GPHN_29:8-2323_ORF1_GPHN_…
ASLSTTPSESPR	ASLSTTPSESPR		28.14	1231.6	-2.3	616.808	17.04	NP_666077.2 lcl|GPHN_4:8-2326_ORF1_GPHN_4:7:2325, XP_006515962.1, XP_006515963.1, XP_006515964.1, XP_006515965.1, XP_006515966.1, XP_006515967.1, XP_006515968.1 lcl|GPHN_38:8-2365_ORF1_GPHN_38:7:2364, XP_006515969.1 lcl|GPHN_3:8-2257_ORF1_GPHN_3:7:2256, XP_006515970.1 lcl|GPHN_1:8-2218_ORF1_GPHN_1:7:2217, XP_017170562.1, XP_017170563.1, XP_017170564.1, XP_017170565.1 lcl|GPHN_29:8-2323_ORF1_GPHN_…
ASLSTTPSESPRAQAT	ASLSTT(+79.97)PSESPRAQAT	T6:Phosphorylation (STY):0.00	33.33	1682.75	1.1	842.384	19.94	NP_666077.2 lcl|GPHN_4:8-2326_ORF1_GPHN_4:7:2325, XP_006515962.1, XP_006515963.1, XP_006515964.1, XP_006515965.1, XP_006515966.1, XP_006515967.1, XP_006515968.1 lcl|GPHN_38:8-2365_ORF1_GPHN_38:7:2364, XP_006515969.1 lcl|GPHN_3:8-2257_ORF1_GPHN_3:7:2256, XP_006515970.1 lcl|GPHN_1:8-2218_ORF1_GPHN_1:7:2217, XP_017170562.1, XP_017170563.1, XP_017170564.1, XP_017170565.1 lcl|GPHN_29:8-2323_ORF1_GPHN_…
ASLSTTPSESPRAQAT	ASLSTT(+79.97)PSES(+79.97)PRAQAT	T6:Phosphorylation (STY):0.00;S10:Phosphorylation (STY):9.40	27.81	1762.72	1.2	882.367	22.99	NP_666077.2 lcl|GPHN_4:8-2326_ORF1_GPHN_4:7:2325, XP_006515962.1, XP_006515963.1, XP_006515964.1, XP_006515965.1, XP_006515966.1, XP_006515967.1, XP_006515968.1 lcl|GPHN_38:8-2365_ORF1_GPHN_38:7:2364, XP_006515969.1 lcl|GPHN_3:8-2257_ORF1_GPHN_3:7:2256, XP_006515970.1 lcl|GPHN_1:8-2218_ORF1_GPHN_1:7:2217, XP_017170562.1, XP_017170563.1, XP_017170564.1, XP_017170565.1 lcl|GPHN_29:8-2323_ORF1_GPHN_…
ASLSTTPSESPRAQAT	ASLSTTPSESPRAQAT		24.91	1602.78	1	802.4	17.91	NP_666077.2 lcl|GPHN_4:8-2326_ORF1_GPHN_4:7:2325, XP_006515962.1, XP_006515963.1, XP_006515964.1, XP_006515965.1, XP_006515966.1, XP_006515967.1, XP_006515968.1 lcl|GPHN_38:8-2365_ORF1_GPHN_38:7:2364, XP_006515969.1 lcl|GPHN_3:8-2257_ORF1_GPHN_3:7:2256, XP_006515970.1 lcl|GPHN_1:8-2218_ORF1_GPHN_1:7:2217, XP_017170562.1, XP_017170563.1, XP_017170564.1, XP_017170565.1 lcl|GPHN_29:8-2323_ORF1_GPHN_…
ASTEDSSSSHITA	ASTEDSSSSHITA		32.83	1291.55	1.1	646.784	15.45	NP_666077.2 lcl|GPHN_4:8-2326_ORF1_GPHN_4:7:2325, XP_006515962.1, XP_006515963.1, XP_006515964.1, XP_006515965.1, XP_006515966.1, XP_006515967.1, XP_006515968.1 lcl|GPHN_38:8-2365_ORF1_GPHN_38:7:2364, XP_006515969.1 lcl|GPHN_3:8-2257_ORF1_GPHN_3:7:2256, XP_006515970.1 lcl|GPHN_1:8-2218_ORF1_GPHN_1:7:2217, XP_017170562.1, XP_017170563.1, XP_017170564.1, XP_017170565.1 lcl|GPHN_29:8-2323_ORF1_GPHN_…
ATEGMILT	A(+42.01)TEGMILT	A1:Acetylation (Protein N-term):1000.00	23.99	876.426	0.8	877.434	38.04	NP_666077.2 lcl|GPHN_4:8-2326_ORF1_GPHN_4:7:2325, XP_006515962.1, XP_006515963.1, XP_006515964.1, XP_006515965.1, XP_006515966.1, XP_006515967.1, XP_006515968.1 lcl|GPHN_38:8-2365_ORF1_GPHN_38:7:2364, XP_006515969.1 lcl|GPHN_3:8-2257_ORF1_GPHN_3:7:2256, XP_006515970.1 lcl|GPHN_1:8-2218_ORF1_GPHN_1:7:2217, XP_017170562.1, XP_017170563.1, XP_017170564.1, XP_017170565.1 lcl|GPHN_29:8-2323_ORF1_GPHN_…
ATEGMILTN	A(+42.01)TEGM(+15.99)ILTN	A1:Acetylation (Protein N-term):1000.00;M5:Oxidation (M):1000.00	24.45	1006.46	2.7	504.241	31.05	NP_666077.2 lcl|GPHN_4:8-2326_ORF1_GPHN_4:7:2325, XP_006515962.1, XP_006515963.1, XP_006515964.1, XP_006515965.1, XP_006515966.1, XP_006515967.1, XP_006515968.1 lcl|GPHN_38:8-2365_ORF1_GPHN_38:7:2364, XP_006515969.1 lcl|GPHN_3:8-2257_ORF1_GPHN_3:7:2256, XP_006515970.1 lcl|GPHN_1:8-2218_ORF1_GPHN_1:7:2217, XP_017170562.1, XP_017170563.1, XP_017170564.1, XP_017170565.1 lcl|GPHN_29:8-2323_ORF1_GPHN_…
ATEGMILTN	A(+42.01)TEGMILTN	A1:Acetylation (Protein N-term):1000.00	24.26	990.469	-1.4	496.241	36.15	NP_666077.2 lcl|GPHN_4:8-2326_ORF1_GPHN_4:7:2325, XP_006515962.1, XP_006515963.1, XP_006515964.1, XP_006515965.1, XP_006515966.1, XP_006515967.1, XP_006515968.1 lcl|GPHN_38:8-2365_ORF1_GPHN_38:7:2364, XP_006515969.1 lcl|GPHN_3:8-2257_ORF1_GPHN_3:7:2256, XP_006515970.1 lcl|GPHN_1:8-2218_ORF1_GPHN_1:7:2217, XP_017170562.1, XP_017170563.1, XP_017170564.1, XP_017170565.1 lcl|GPHN_29:8-2323_ORF1_GPHN_…
ATEGMILTNHDH	A(+42.01)TEGM(+15.99)ILTNHDH	A1:Acetylation (Protein N-term):1000.00;M5:Oxidation (M):1000.00	40.46	1395.61	1.3	698.813	22.34	NP_666077.2 lcl|GPHN_4:8-2326_ORF1_GPHN_4:7:2325, XP_006515962.1, XP_006515963.1, XP_006515964.1, XP_006515965.1, XP_006515966.1, XP_006515967.1, XP_006515968.1 lcl|GPHN_38:8-2365_ORF1_GPHN_38:7:2364, XP_006515969.1 lcl|GPHN_3:8-2257_ORF1_GPHN_3:7:2256, XP_006515970.1 lcl|GPHN_1:8-2218_ORF1_GPHN_1:7:2217, XP_017170562.1, XP_017170563.1, XP_017170564.1, XP_017170565.1 lcl|GPHN_29:8-2323_ORF1_GPHN_…
ATEGMILTNHDHQ	A(+42.01)TEGMILTNHDHQ	A1:Acetylation (Protein N-term):1000.00	41.44	1507.67	-1.1	754.843	24.42	NP_666077.2 lcl|GPHN_4:8-2326_ORF1_GPHN_4:7:2325, XP_006515962.1, XP_006515963.1, XP_006515964.1, XP_006515965.1, XP_006515966.1, XP_006515967.1, XP_006515968.1 lcl|GPHN_38:8-2365_ORF1_GPHN_38:7:2364, XP_006515969.1 lcl|GPHN_3:8-2257_ORF1_GPHN_3:7:2256, XP_006515970.1 lcl|GPHN_1:8-2218_ORF1_GPHN_1:7:2217, XP_017170562.1, XP_017170563.1, XP_017170564.1, XP_017170565.1 lcl|GPHN_29:8-2323_ORF1_GPHN_…
ATEGMILTNHDHQ	A(+42.01)TEGM(+15.99)ILTNHDHQ	A1:Acetylation (Protein N-term):1000.00;M5:Oxidation (M):1000.00	40.55	1523.67	0.8	762.842	22.64	NP_666077.2 lcl|GPHN_4:8-2326_ORF1_GPHN_4:7:2325, XP_006515962.1, XP_006515963.1, XP_006515964.1, XP_006515965.1, XP_006515966.1, XP_006515967.1, XP_006515968.1 lcl|GPHN_38:8-2365_ORF1_GPHN_38:7:2364, XP_006515969.1 lcl|GPHN_3:8-2257_ORF1_GPHN_3:7:2256, XP_006515970.1 lcl|GPHN_1:8-2218_ORF1_GPHN_1:7:2217, XP_017170562.1, XP_017170563.1, XP_017170564.1, XP_017170565.1 lcl|GPHN_29:8-2323_ORF1_GPHN_…
ATEGMILTNHDHQ	ATEGM(+15.99)ILTNHDHQ	M5:Oxidation (M):1000.00	37.39	1481.66	1.1	741.837	16.48	NP_666077.2 lcl|GPHN_4:8-2326_ORF1_GPHN_4:7:2325, XP_006515962.1, XP_006515963.1, XP_006515964.1, XP_006515965.1, XP_006515966.1, XP_006515967.1, XP_006515968.1 lcl|GPHN_38:8-2365_ORF1_GPHN_38:7:2364, XP_006515969.1 lcl|GPHN_3:8-2257_ORF1_GPHN_3:7:2256, XP_006515970.1 lcl|GPHN_1:8-2218_ORF1_GPHN_1:7:2217, XP_017170562.1, XP_017170563.1, XP_017170564.1, XP_017170565.1 lcl|GPHN_29:8-2323_ORF1_GPHN_…
ATEGMILTNHDHQI	A(+42.01)TEGM(+15.99)ILTNHDHQI	A1:Acetylation (Protein N-term):1000.00;M5:Oxidation (M):1000.00	47.64	1636.75	1.6	819.384	24.3	NP_666077.2 lcl|GPHN_4:8-2326_ORF1_GPHN_4:7:2325, XP_006515962.1, XP_006515963.1, XP_006515964.1, XP_006515965.1, XP_006515966.1, XP_006515967.1, XP_006515968.1 lcl|GPHN_38:8-2365_ORF1_GPHN_38:7:2364, XP_006515969.1 lcl|GPHN_3:8-2257_ORF1_GPHN_3:7:2256, XP_006515970.1 lcl|GPHN_1:8-2218_ORF1_GPHN_1:7:2217, XP_017170562.1, XP_017170563.1, XP_017170564.1, XP_017170565.1 lcl|GPHN_29:8-2323_ORF1_GPHN_…
ATEGMILTNHDHQIR	A(+42.01)TEGMILTNHDHQIR	A1:Acetylation (Protein N-term):1000.00	51.3	1776.86	1.7	889.438	22.77	NP_666077.2 lcl|GPHN_4:8-2326_ORF1_GPHN_4:7:2325, XP_006515962.1, XP_006515963.1, XP_006515964.1, XP_006515965.1, XP_006515966.1, XP_006515967.1, XP_006515968.1 lcl|GPHN_38:8-2365_ORF1_GPHN_38:7:2364, XP_006515969.1 lcl|GPHN_3:8-2257_ORF1_GPHN_3:7:2256, XP_006515970.1 lcl|GPHN_1:8-2218_ORF1_GPHN_1:7:2217, XP_017170562.1, XP_017170563.1, XP_017170564.1, XP_017170565.1 lcl|GPHN_29:8-2323_ORF1_GPHN_…
ATEGMILTNHDHQIR	A(+42.01)TEGM(+15.99)ILTNHDHQIR	A1:Acetylation (Protein N-term):1000.00;M5:Oxidation (M):1000.00	48.3	1792.85	0.7	598.625	21.39	NP_666077.2 lcl|GPHN_4:8-2326_ORF1_GPHN_4:7:2325, XP_006515962.1, XP_006515963.1, XP_006515964.1, XP_006515965.1, XP_006515966.1, XP_006515967.1, XP_006515968.1 lcl|GPHN_38:8-2365_ORF1_GPHN_38:7:2364, XP_006515969.1 lcl|GPHN_3:8-2257_ORF1_GPHN_3:7:2256, XP_006515970.1 lcl|GPHN_1:8-2218_ORF1_GPHN_1:7:2217, XP_017170562.1, XP_017170563.1, XP_017170564.1, XP_017170565.1 lcl|GPHN_29:8-2323_ORF1_GPHN_…
ATEGMILTNHDHQIRV	A(+42.01)TEGM(+15.99)ILTNHDHQIRV	A1:Acetylation (Protein N-term):1000.00;M5:Oxidation (M):1000.00	45.06	1891.92	-0.1	631.648	23.49	NP_666077.2 lcl|GPHN_4:8-2326_ORF1_GPHN_4:7:2325, XP_006515962.1, XP_006515963.1, XP_006515964.1, XP_006515965.1, XP_006515966.1, XP_006515967.1, XP_006515968.1 lcl|GPHN_38:8-2365_ORF1_GPHN_38:7:2364, XP_006515969.1 lcl|GPHN_3:8-2257_ORF1_GPHN_3:7:2256, XP_006515970.1 lcl|GPHN_1:8-2218_ORF1_GPHN_1:7:2217, XP_017170562.1, XP_017170563.1, XP_017170564.1, XP_017170565.1 lcl|GPHN_29:8-2323_ORF1_GPHN_…
ATEGMILTNHDHQIRVG	A(+42.01)TEGM(+15.99)ILTNHDHQIRVG	A1:Acetylation (Protein N-term):1000.00;M5:Oxidation (M):1000.00	52.64	1948.94	-0.9	650.654	23	NP_666077.2 lcl|GPHN_4:8-2326_ORF1_GPHN_4:7:2325, XP_006515962.1, XP_006515963.1, XP_006515964.1, XP_006515965.1, XP_006515966.1, XP_006515967.1, XP_006515968.1 lcl|GPHN_38:8-2365_ORF1_GPHN_38:7:2364, XP_006515969.1 lcl|GPHN_3:8-2257_ORF1_GPHN_3:7:2256, XP_006515970.1 lcl|GPHN_1:8-2218_ORF1_GPHN_1:7:2217, XP_017170562.1, XP_017170563.1, XP_017170564.1, XP_017170565.1 lcl|GPHN_29:8-2323_ORF1_GPHN_…
ATEGMILTNHDHQIRVGV	A(+42.01)TEGM(+15.99)ILTNHDHQIRVGV	A1:Acetylation (Protein N-term):1000.00;M5:Oxidation (M):1000.00	30.43	2048.01	0.9	683.678	24.72	NP_666077.2 lcl|GPHN_4:8-2326_ORF1_GPHN_4:7:2325, XP_006515962.1, XP_006515963.1, XP_006515964.1, XP_006515965.1, XP_006515966.1, XP_006515967.1, XP_006515968.1 lcl|GPHN_38:8-2365_ORF1_GPHN_38:7:2364, XP_006515969.1 lcl|GPHN_3:8-2257_ORF1_GPHN_3:7:2256, XP_006515970.1 lcl|GPHN_1:8-2218_ORF1_GPHN_1:7:2217, XP_017170562.1, XP_017170563.1, XP_017170564.1, XP_017170565.1 lcl|GPHN_29:8-2323_ORF1_GPHN_…
ATEGMILTNHDHQIRVGVL	A(+42.01)TEGM(+15.99)ILTNHDHQIRVGVL	A1:Acetylation (Protein N-term):1000.00;M5:Oxidation (M):1000.00	43.99	2161.09	4	721.375	26.97	NP_666077.2 lcl|GPHN_4:8-2326_ORF1_GPHN_4:7:2325, XP_006515962.1, XP_006515963.1, XP_006515964.1, XP_006515965.1, XP_006515966.1, XP_006515967.1, XP_006515968.1 lcl|GPHN_38:8-2365_ORF1_GPHN_38:7:2364, XP_006515969.1 lcl|GPHN_3:8-2257_ORF1_GPHN_3:7:2256, XP_006515970.1 lcl|GPHN_1:8-2218_ORF1_GPHN_1:7:2217, XP_017170562.1, XP_017170563.1, XP_017170564.1, XP_017170565.1 lcl|GPHN_29:8-2323_ORF1_GPHN_…
ATEGMILTNHDHQIRVGVLT	A(+42.01)TEGM(+15.99)ILTNHDHQIRVGVLT	A1:Acetylation (Protein N-term):1000.00;M5:Oxidation (M):1000.00	27.87	2262.14	0.3	755.055	26.5	NP_666077.2 lcl|GPHN_4:8-2326_ORF1_GPHN_4:7:2325, XP_006515962.1, XP_006515963.1, XP_006515964.1, XP_006515965.1, XP_006515966.1, XP_006515967.1, XP_006515968.1 lcl|GPHN_38:8-2365_ORF1_GPHN_38:7:2364, XP_006515969.1 lcl|GPHN_3:8-2257_ORF1_GPHN_3:7:2256, XP_006515970.1 lcl|GPHN_1:8-2218_ORF1_GPHN_1:7:2217, XP_017170562.1, XP_017170563.1, XP_017170564.1, XP_017170565.1 lcl|GPHN_29:8-2323_ORF1_GPHN_…
ATEGMILTNHDHQIRVGVLTV	A(+42.01)TEGM(+15.99)ILTNHDHQIRVGVLTV	A1:Acetylation (Protein N-term):1000.00;M5:Oxidation (M):1000.00	41.37	2361.21	1.7	788.079	29.25	NP_666077.2 lcl|GPHN_4:8-2326_ORF1_GPHN_4:7:2325, XP_006515962.1, XP_006515963.1, XP_006515964.1, XP_006515965.1, XP_006515966.1, XP_006515967.1, XP_006515968.1 lcl|GPHN_38:8-2365_ORF1_GPHN_38:7:2364, XP_006515969.1 lcl|GPHN_3:8-2257_ORF1_GPHN_3:7:2256, XP_006515970.1 lcl|GPHN_1:8-2218_ORF1_GPHN_1:7:2217, XP_017170562.1, XP_017170563.1, XP_017170564.1, XP_017170565.1 lcl|GPHN_29:8-2323_ORF1_GPHN_…
ATGSADKRIPDS	A(+42.01)TGSADKRIPDS	A1:Acetylation (Protein N-term):1000.00	36.54	1258.62	-2.2	630.314	15.73	NP_666077.2 lcl|GPHN_4:8-2326_ORF1_GPHN_4:7:2325, XP_006515962.1, XP_006515963.1, XP_006515964.1, XP_006515965.1, XP_006515968.1 lcl|GPHN_38:8-2365_ORF1_GPHN_38:7:2364, XP_017170562.1, XP_017170563.1, XP_017170564.1, lcl|GPHN_101:8-994_ORF2_GPHN_101:7:993, lcl|GPHN_105:73-2247_ORF1_GPHN_105:72:2246, lcl|GPHN_119:441-2183_ORF3_GPHN_119:440:2182, lcl|GPHN_121:8-2368_ORF1_GPHN_121:7:2367, lcl|GPHN_1…
ATGSADKRIPDS	ATGSADKRIPDS		35.88	1216.6	0.3	609.31	14.19	NP_666077.2 lcl|GPHN_4:8-2326_ORF1_GPHN_4:7:2325, XP_006515962.1, XP_006515963.1, XP_006515964.1, XP_006515965.1, XP_006515968.1 lcl|GPHN_38:8-2365_ORF1_GPHN_38:7:2364, XP_017170562.1, XP_017170563.1, XP_017170564.1, lcl|GPHN_101:8-994_ORF2_GPHN_101:7:993, lcl|GPHN_105:73-2247_ORF1_GPHN_105:72:2246, lcl|GPHN_119:441-2183_ORF3_GPHN_119:440:2182, lcl|GPHN_121:8-2368_ORF1_GPHN_121:7:2367, lcl|GPHN_1…
ATGSADKRIPDSIISRG	ATGSADKRIPDSIISRG		46.64	1742.93	0.8	436.74	19.26	NP_666077.2 lcl|GPHN_4:8-2326_ORF1_GPHN_4:7:2325, XP_006515962.1, XP_006515963.1, XP_006515964.1, XP_006515965.1, XP_006515968.1 lcl|GPHN_38:8-2365_ORF1_GPHN_38:7:2364, XP_017170562.1, XP_017170563.1, XP_017170564.1, lcl|GPHN_101:8-994_ORF2_GPHN_101:7:993, lcl|GPHN_105:73-2247_ORF1_GPHN_105:72:2246, lcl|GPHN_119:441-2183_ORF3_GPHN_119:440:2182, lcl|GPHN_121:8-2368_ORF1_GPHN_121:7:2367, lcl|GPHN_1…
ATGSADKRIPDSIISRG	A(+42.01)TGSADKRIPDSIISRG	A1:Acetylation (Protein N-term):1000.00	43.45	1784.94	1.2	595.987	21.09	NP_666077.2 lcl|GPHN_4:8-2326_ORF1_GPHN_4:7:2325, XP_006515962.1, XP_006515963.1, XP_006515964.1, XP_006515965.1, XP_006515968.1 lcl|GPHN_38:8-2365_ORF1_GPHN_38:7:2364, XP_017170562.1, XP_017170563.1, XP_017170564.1, lcl|GPHN_101:8-994_ORF2_GPHN_101:7:993, lcl|GPHN_105:73-2247_ORF1_GPHN_105:72:2246, lcl|GPHN_119:441-2183_ORF3_GPHN_119:440:2182, lcl|GPHN_121:8-2368_ORF1_GPHN_121:7:2367, lcl|GPHN_1…
ATIQEHGYPT	ATIQEHGYPT		38	1115.52	1.1	558.77	18.2	NP_666077.2 lcl|GPHN_4:8-2326_ORF1_GPHN_4:7:2325, XP_006515962.1, XP_006515963.1, XP_006515964.1, XP_006515965.1, XP_006515966.1, XP_006515967.1, XP_006515968.1 lcl|GPHN_38:8-2365_ORF1_GPHN_38:7:2364, XP_006515969.1 lcl|GPHN_3:8-2257_ORF1_GPHN_3:7:2256, XP_006515970.1 lcl|GPHN_1:8-2218_ORF1_GPHN_1:7:2217, XP_017170562.1, XP_017170563.1, XP_017170564.1, XP_017170565.1 lcl|GPHN_29:8-2323_ORF1_GPHN_…
ATIQEHGYPTI	ATIQEHGYPTI		22.84	1228.61	-1.2	615.311	23.06	NP_666077.2 lcl|GPHN_4:8-2326_ORF1_GPHN_4:7:2325, XP_006515962.1, XP_006515963.1, XP_006515964.1, XP_006515965.1, XP_006515966.1, XP_006515967.1, XP_006515968.1 lcl|GPHN_38:8-2365_ORF1_GPHN_38:7:2364, XP_006515969.1 lcl|GPHN_3:8-2257_ORF1_GPHN_3:7:2256, XP_006515970.1 lcl|GPHN_1:8-2218_ORF1_GPHN_1:7:2217, XP_017170562.1, XP_017170563.1, XP_017170564.1, XP_017170565.1 lcl|GPHN_29:8-2323_ORF1_GPHN_…
ATIQEHGYPTIN	ATIQEHGYPTIN		36.7	1342.65	-0.2	672.333	21.7	NP_666077.2 lcl|GPHN_4:8-2326_ORF1_GPHN_4:7:2325, XP_006515962.1, XP_006515963.1, XP_006515964.1, XP_006515965.1, XP_006515966.1, XP_006515967.1, XP_006515968.1 lcl|GPHN_38:8-2365_ORF1_GPHN_38:7:2364, XP_006515969.1 lcl|GPHN_3:8-2257_ORF1_GPHN_3:7:2256, XP_006515970.1 lcl|GPHN_1:8-2218_ORF1_GPHN_1:7:2217, XP_017170562.1, XP_017170563.1, XP_017170564.1, XP_017170565.1 lcl|GPHN_29:8-2323_ORF1_GPHN_…
ATIQEHGYPTINL	ATIQEHGYPTINL		35.15	1455.74	1.2	728.876	26.85	NP_666077.2 lcl|GPHN_4:8-2326_ORF1_GPHN_4:7:2325, XP_006515962.1, XP_006515963.1, XP_006515964.1, XP_006515965.1, XP_006515966.1, XP_006515967.1, XP_006515968.1 lcl|GPHN_38:8-2365_ORF1_GPHN_38:7:2364, XP_006515969.1 lcl|GPHN_3:8-2257_ORF1_GPHN_3:7:2256, XP_006515970.1 lcl|GPHN_1:8-2218_ORF1_GPHN_1:7:2217, XP_017170562.1, XP_017170563.1, XP_017170564.1, XP_017170565.1 lcl|GPHN_29:8-2323_ORF1_GPHN_…
ATIQEHGYPTINLG	ATIQEHGYPTINLG		37.01	1512.76	-0.5	757.385	26.06	NP_666077.2 lcl|GPHN_4:8-2326_ORF1_GPHN_4:7:2325, XP_006515962.1, XP_006515963.1, XP_006515964.1, XP_006515965.1, XP_006515966.1, XP_006515967.1, XP_006515968.1 lcl|GPHN_38:8-2365_ORF1_GPHN_38:7:2364, XP_006515969.1 lcl|GPHN_3:8-2257_ORF1_GPHN_3:7:2256, XP_006515970.1 lcl|GPHN_1:8-2218_ORF1_GPHN_1:7:2217, XP_017170562.1, XP_017170563.1, XP_017170564.1, XP_017170565.1 lcl|GPHN_29:8-2323_ORF1_GPHN_…
ATKEVIEREAPG	ATKEVIEREAPG		35.25	1298.68	0.2	650.349	15.82	NP_666077.2 lcl|GPHN_4:8-2326_ORF1_GPHN_4:7:2325, XP_006515962.1, XP_006515963.1, XP_006515964.1, XP_006515965.1, XP_006515966.1, XP_006515967.1, XP_006515968.1 lcl|GPHN_38:8-2365_ORF1_GPHN_38:7:2364, XP_006515969.1 lcl|GPHN_3:8-2257_ORF1_GPHN_3:7:2256, XP_006515970.1 lcl|GPHN_1:8-2218_ORF1_GPHN_1:7:2217, XP_017170562.1, XP_017170563.1, XP_017170564.1, XP_017170565.1 lcl|GPHN_29:8-2323_ORF1_GPHN_…
ATKEVIEREAPGMA	ATKEVIEREAPGM(+15.99)A	M13:Oxidation (M):1000.00	41.31	1516.76	1	759.386	16.56	NP_666077.2 lcl|GPHN_4:8-2326_ORF1_GPHN_4:7:2325, XP_006515962.1, XP_006515963.1, XP_006515964.1, XP_006515965.1, XP_006515966.1, XP_006515967.1, XP_006515968.1 lcl|GPHN_38:8-2365_ORF1_GPHN_38:7:2364, XP_006515969.1 lcl|GPHN_3:8-2257_ORF1_GPHN_3:7:2256, XP_006515970.1 lcl|GPHN_1:8-2218_ORF1_GPHN_1:7:2217, XP_017170562.1, XP_017170563.1, XP_017170564.1, XP_017170565.1 lcl|GPHN_29:8-2323_ORF1_GPHN_…
ATLDIDGVR	ATLDIDGVR		30.28	958.508	3.2	480.263	23.02	NP_666077.2 lcl|GPHN_4:8-2326_ORF1_GPHN_4:7:2325, XP_006515962.1, XP_006515963.1, XP_006515964.1, XP_006515965.1, XP_006515966.1, XP_006515967.1, XP_006515968.1 lcl|GPHN_38:8-2365_ORF1_GPHN_38:7:2364, XP_006515969.1 lcl|GPHN_3:8-2257_ORF1_GPHN_3:7:2256, XP_006515970.1 lcl|GPHN_1:8-2218_ORF1_GPHN_1:7:2217, XP_017170562.1, XP_017170563.1, XP_017170564.1, XP_017170565.1 lcl|GPHN_29:8-2323_ORF1_GPHN_…
ATLDIDGVR	A(+42.01)TLDIDGVR	A1:Acetylation (Protein N-term):1000.00	19.63	1000.52	-7	501.263	25.38	NP_666077.2 lcl|GPHN_4:8-2326_ORF1_GPHN_4:7:2325, XP_006515962.1, XP_006515963.1, XP_006515964.1, XP_006515965.1, XP_006515966.1, XP_006515967.1, XP_006515968.1 lcl|GPHN_38:8-2365_ORF1_GPHN_38:7:2364, XP_006515969.1 lcl|GPHN_3:8-2257_ORF1_GPHN_3:7:2256, XP_006515970.1 lcl|GPHN_1:8-2218_ORF1_GPHN_1:7:2217, XP_017170562.1, XP_017170563.1, XP_017170564.1, XP_017170565.1 lcl|GPHN_29:8-2323_ORF1_GPHN_…
ATLDIDGVRK	ATLDIDGVRK		31.92	1086.6	1	544.309	19.17	NP_666077.2 lcl|GPHN_4:8-2326_ORF1_GPHN_4:7:2325, XP_006515962.1, XP_006515963.1, XP_006515964.1, XP_006515965.1, XP_006515966.1, XP_006515967.1, XP_006515968.1 lcl|GPHN_38:8-2365_ORF1_GPHN_38:7:2364, XP_006515969.1 lcl|GPHN_3:8-2257_ORF1_GPHN_3:7:2256, XP_006515970.1 lcl|GPHN_1:8-2218_ORF1_GPHN_1:7:2217, XP_017170562.1, XP_017170563.1, XP_017170564.1, XP_017170565.1 lcl|GPHN_29:8-2323_ORF1_GPHN_…
ATLDIDGVRKII	ATLDIDGVRKII		25.05	1312.77	-1.1	438.597	27.12	NP_666077.2 lcl|GPHN_4:8-2326_ORF1_GPHN_4:7:2325, XP_006515962.1, XP_006515963.1, XP_006515964.1, XP_006515965.1, XP_006515966.1, XP_006515967.1, XP_006515968.1 lcl|GPHN_38:8-2365_ORF1_GPHN_38:7:2364, XP_006515969.1 lcl|GPHN_3:8-2257_ORF1_GPHN_3:7:2256, XP_006515970.1 lcl|GPHN_1:8-2218_ORF1_GPHN_1:7:2217, XP_017170562.1, XP_017170563.1, XP_017170564.1, XP_017170565.1 lcl|GPHN_29:8-2323_ORF1_GPHN_…
ATSRLSTASCPTPK	ATSRLS(+79.97)TASC(+57.02)PTPK	S6:Phosphorylation (STY):11.06;C10:Carbamidomethylation:1000.00	49.41	1555.71	1.5	778.862	16.47	NP_666077.2 lcl|GPHN_4:8-2326_ORF1_GPHN_4:7:2325, XP_006515962.1, XP_006515963.1, XP_006515964.1, XP_006515965.1, XP_006515966.1, XP_006515967.1, XP_006515968.1 lcl|GPHN_38:8-2365_ORF1_GPHN_38:7:2364, XP_006515969.1 lcl|GPHN_3:8-2257_ORF1_GPHN_3:7:2256, XP_006515970.1 lcl|GPHN_1:8-2218_ORF1_GPHN_1:7:2217, XP_017170562.1, XP_017170563.1, XP_017170564.1, XP_017170565.1 lcl|GPHN_29:8-2323_ORF1_GPHN_…
ATSRLSTASCPTPK	ATSRLSTASC(+57.02)PTPK	C10:Carbamidomethylation:1000.00	35.89	1475.74	-1.1	492.92	14.87	NP_666077.2 lcl|GPHN_4:8-2326_ORF1_GPHN_4:7:2325, XP_006515962.1, XP_006515963.1, XP_006515964.1, XP_006515965.1, XP_006515966.1, XP_006515967.1, XP_006515968.1 lcl|GPHN_38:8-2365_ORF1_GPHN_38:7:2364, XP_006515969.1 lcl|GPHN_3:8-2257_ORF1_GPHN_3:7:2256, XP_006515970.1 lcl|GPHN_1:8-2218_ORF1_GPHN_1:7:2217, XP_017170562.1, XP_017170563.1, XP_017170564.1, XP_017170565.1 lcl|GPHN_29:8-2323_ORF1_GPHN_…
ATSRLSTASCPTPK	ATSRLS(+79.97)TAS(+79.97)C(+57.02)PTPK	S6:Phosphorylation (STY):0.00;S9:Phosphorylation (STY):0.00;C10:Carbamidomethylation:1000.00	29.74	1635.67	-0.2	818.843	18.09	NP_666077.2 lcl|GPHN_4:8-2326_ORF1_GPHN_4:7:2325, XP_006515962.1, XP_006515963.1, XP_006515964.1, XP_006515965.1, XP_006515966.1, XP_006515967.1, XP_006515968.1 lcl|GPHN_38:8-2365_ORF1_GPHN_38:7:2364, XP_006515969.1 lcl|GPHN_3:8-2257_ORF1_GPHN_3:7:2256, XP_006515970.1 lcl|GPHN_1:8-2218_ORF1_GPHN_1:7:2217, XP_017170562.1, XP_017170563.1, XP_017170564.1, XP_017170565.1 lcl|GPHN_29:8-2323_ORF1_GPHN_…
ATSRLSTASCPTPKQ	ATSRLS(+79.97)TASC(+57.02)PTPKQ	S6:Phosphorylation (STY):14.02;C10:Carbamidomethylation:1000.00	30.02	1683.77	2	562.263	16.62	XP_006515962.1, XP_006515963.1, XP_006515964.1, XP_006515965.1, XP_006515966.1, XP_006515967.1, XP_017170564.1, XP_017170566.1, XP_017170567.1, XP_017170568.1, lcl|GPHN_103:8-2287_ORF1_GPHN_103:7:2286, lcl|GPHN_117:8-2179_ORF1_GPHN_117:7:2178, lcl|GPHN_120:8-2125_ORF1_GPHN_120:7:2124, lcl|GPHN_123:8-2149_ORF1_GPHN_123:7:2148, lcl|GPHN_12:8-2380_ORF1_GPHN_12:7:2379, lcl|GPHN_130:8-1864_ORF1_GPHN_1…
ATSRLSTASCPTPKVQ	ATSRLS(+79.97)TAS(+79.97)C(+57.02)PTPKVQ	S6:Phosphorylation (STY):0.00;S9:Phosphorylation (STY):0.00;C10:Carbamidomethylation:1000.00	29.44	1862.8	-0.2	621.94	20.71	NP_666077.2 lcl|GPHN_4:8-2326_ORF1_GPHN_4:7:2325, XP_006515968.1 lcl|GPHN_38:8-2365_ORF1_GPHN_38:7:2364, XP_006515969.1 lcl|GPHN_3:8-2257_ORF1_GPHN_3:7:2256, XP_006515970.1 lcl|GPHN_1:8-2218_ORF1_GPHN_1:7:2217, XP_030102593.1 lcl|GPHN_2:8-1945_ORF1_GPHN_2:7:1944, lcl|GPHN_104:441-1244_ORF3_GPHN_104:440:1243, lcl|GPHN_105:73-2247_ORF1_GPHN_105:72:2246, lcl|GPHN_111:82-2160_ORF1_GPHN_111:81:2159, l…
ATVGVTEVEV	ATVGVTEVEV		24.82	1002.52	-0.6	502.269	27.29	NP_666077.2 lcl|GPHN_4:8-2326_ORF1_GPHN_4:7:2325, XP_006515962.1, XP_006515963.1, XP_006515964.1, XP_006515965.1, XP_006515966.1, XP_006515967.1, XP_006515968.1 lcl|GPHN_38:8-2365_ORF1_GPHN_38:7:2364, XP_006515969.1 lcl|GPHN_3:8-2257_ORF1_GPHN_3:7:2256, XP_006515970.1 lcl|GPHN_1:8-2218_ORF1_GPHN_1:7:2217, XP_017170562.1, XP_017170563.1, XP_017170564.1, XP_017170565.1 lcl|GPHN_29:8-2323_ORF1_GPHN_…
ATVGVTEVEVN	ATVGVTEVEVN		23.85	1116.57	3.7	559.293	25.14	NP_666077.2 lcl|GPHN_4:8-2326_ORF1_GPHN_4:7:2325, XP_006515962.1, XP_006515963.1, XP_006515964.1, XP_006515965.1, XP_006515966.1, XP_006515967.1, XP_006515968.1 lcl|GPHN_38:8-2365_ORF1_GPHN_38:7:2364, XP_006515969.1 lcl|GPHN_3:8-2257_ORF1_GPHN_3:7:2256, XP_006515970.1 lcl|GPHN_1:8-2218_ORF1_GPHN_1:7:2217, XP_017170562.1, XP_017170563.1, XP_017170564.1, XP_017170565.1 lcl|GPHN_29:8-2323_ORF1_GPHN_…
ATVGVTEVEVNK	ATVGVTEVEVNK		39.25	1244.66	0.2	623.338	20.82	NP_666077.2 lcl|GPHN_4:8-2326_ORF1_GPHN_4:7:2325, XP_006515962.1, XP_006515963.1, XP_006515964.1, XP_006515965.1, XP_006515966.1, XP_006515967.1, XP_006515968.1 lcl|GPHN_38:8-2365_ORF1_GPHN_38:7:2364, XP_006515969.1 lcl|GPHN_3:8-2257_ORF1_GPHN_3:7:2256, XP_006515970.1 lcl|GPHN_1:8-2218_ORF1_GPHN_1:7:2217, XP_017170562.1, XP_017170563.1, XP_017170564.1, XP_017170565.1 lcl|GPHN_29:8-2323_ORF1_GPHN_…
ATVGVTEVEVNKFPV	ATVGVTEVEVNKFPV		35.18	1587.85	1.6	794.934	28.17	NP_666077.2 lcl|GPHN_4:8-2326_ORF1_GPHN_4:7:2325, XP_006515962.1, XP_006515963.1, XP_006515964.1, XP_006515965.1, XP_006515966.1, XP_006515967.1, XP_006515968.1 lcl|GPHN_38:8-2365_ORF1_GPHN_38:7:2364, XP_006515969.1 lcl|GPHN_3:8-2257_ORF1_GPHN_3:7:2256, XP_006515970.1 lcl|GPHN_1:8-2218_ORF1_GPHN_1:7:2217, XP_017170562.1, XP_017170563.1, XP_017170564.1, XP_017170565.1 lcl|GPHN_29:8-2323_ORF1_GPHN_…
ATVGVTEVEVNKFPVVA	ATVGVTEVEVNKFPVVA		35.71	1757.96	7.6	879.992	29.07	NP_666077.2 lcl|GPHN_4:8-2326_ORF1_GPHN_4:7:2325, XP_006515962.1, XP_006515963.1, XP_006515964.1, XP_006515965.1, XP_006515966.1, XP_006515967.1, XP_006515968.1 lcl|GPHN_38:8-2365_ORF1_GPHN_38:7:2364, XP_006515969.1 lcl|GPHN_3:8-2257_ORF1_GPHN_3:7:2256, XP_006515970.1 lcl|GPHN_1:8-2218_ORF1_GPHN_1:7:2217, XP_017170562.1, XP_017170563.1, XP_017170564.1, XP_017170565.1 lcl|GPHN_29:8-2323_ORF1_GPHN_…
ATVGVTEVEVNKFPVVAV	ATVGVTEVEVNKFPVVAV		43.79	1857.02	0.6	929.52	30.94	NP_666077.2 lcl|GPHN_4:8-2326_ORF1_GPHN_4:7:2325, XP_006515962.1, XP_006515963.1, XP_006515964.1, XP_006515965.1, XP_006515966.1, XP_006515967.1, XP_006515968.1 lcl|GPHN_38:8-2365_ORF1_GPHN_38:7:2364, XP_006515969.1 lcl|GPHN_3:8-2257_ORF1_GPHN_3:7:2256, XP_006515970.1 lcl|GPHN_1:8-2218_ORF1_GPHN_1:7:2217, XP_017170562.1, XP_017170563.1, XP_017170564.1, XP_017170565.1 lcl|GPHN_29:8-2323_ORF1_GPHN_…
ATVGVTEVEVNKFPVVAVM	ATVGVTEVEVNKFPVVAVM(+15.99)	M19:Oxidation (M):1000.00	52.02	2004.06	0.1	1003.04	30.2	NP_666077.2 lcl|GPHN_4:8-2326_ORF1_GPHN_4:7:2325, XP_006515962.1, XP_006515963.1, XP_006515964.1, XP_006515965.1, XP_006515966.1, XP_006515967.1, XP_006515968.1 lcl|GPHN_38:8-2365_ORF1_GPHN_38:7:2364, XP_006515969.1 lcl|GPHN_3:8-2257_ORF1_GPHN_3:7:2256, XP_006515970.1 lcl|GPHN_1:8-2218_ORF1_GPHN_1:7:2217, XP_017170562.1, XP_017170563.1, XP_017170564.1, XP_017170565.1 lcl|GPHN_29:8-2323_ORF1_GPHN_…
ATVGVTEVEVNKFPVVAVM	ATVGVTEVEVNKFPVVAVM		28.41	1988.07	-0.3	995.04	32.6	NP_666077.2 lcl|GPHN_4:8-2326_ORF1_GPHN_4:7:2325, XP_006515962.1, XP_006515963.1, XP_006515964.1, XP_006515965.1, XP_006515966.1, XP_006515967.1, XP_006515968.1 lcl|GPHN_38:8-2365_ORF1_GPHN_38:7:2364, XP_006515969.1 lcl|GPHN_3:8-2257_ORF1_GPHN_3:7:2256, XP_006515970.1 lcl|GPHN_1:8-2218_ORF1_GPHN_1:7:2217, XP_017170562.1, XP_017170563.1, XP_017170564.1, XP_017170565.1 lcl|GPHN_29:8-2323_ORF1_GPHN_…
ATVGVTEVEVNKFPVVAVMSTGNELLNPEDDLLPGK	ATVGVTEVEVNKFPVVAVMSTGNELLNPEDDLLPGK		59.14	3780.95	1	946.245	35.86	NP_666077.2 lcl|GPHN_4:8-2326_ORF1_GPHN_4:7:2325, XP_006515962.1, XP_006515963.1, XP_006515964.1, XP_006515965.1, XP_006515966.1, XP_006515967.1, XP_006515968.1 lcl|GPHN_38:8-2365_ORF1_GPHN_38:7:2364, XP_006515969.1 lcl|GPHN_3:8-2257_ORF1_GPHN_3:7:2256, XP_006515970.1 lcl|GPHN_1:8-2218_ORF1_GPHN_1:7:2217, XP_017170562.1, XP_017170563.1, XP_017170564.1, XP_017170565.1 lcl|GPHN_29:8-2323_ORF1_GPHN_…
ATVGVTEVEVNKFPVVAVMSTGNELLNPEDDLLPGK	ATVGVTEVEVNKFPVVAVM(+15.99)STGNELLNPEDDLLPGK	M19:Oxidation (M):1000.00	52.54	3796.94	0.1	1266.66	33.34	NP_666077.2 lcl|GPHN_4:8-2326_ORF1_GPHN_4:7:2325, XP_006515962.1, XP_006515963.1, XP_006515964.1, XP_006515965.1, XP_006515966.1, XP_006515967.1, XP_006515968.1 lcl|GPHN_38:8-2365_ORF1_GPHN_38:7:2364, XP_006515969.1 lcl|GPHN_3:8-2257_ORF1_GPHN_3:7:2256, XP_006515970.1 lcl|GPHN_1:8-2218_ORF1_GPHN_1:7:2217, XP_017170562.1, XP_017170563.1, XP_017170564.1, XP_017170565.1 lcl|GPHN_29:8-2323_ORF1_GPHN_…
AVDITKVA	AVDITKVA		26.84	815.475	-1.9	408.744	21.53	NP_666077.2 lcl|GPHN_4:8-2326_ORF1_GPHN_4:7:2325, XP_006515962.1, XP_006515963.1, XP_006515964.1, XP_006515965.1, XP_006515966.1, XP_006515967.1, XP_006515968.1 lcl|GPHN_38:8-2365_ORF1_GPHN_38:7:2364, XP_006515969.1 lcl|GPHN_3:8-2257_ORF1_GPHN_3:7:2256, XP_006515970.1 lcl|GPHN_1:8-2218_ORF1_GPHN_1:7:2217, XP_017170562.1, XP_017170563.1, XP_017170564.1, XP_017170565.1 lcl|GPHN_29:8-2323_ORF1_GPHN_…
AVRAADGPGDRF	AVRAADGPGDRF		34.72	1230.61	1.6	616.313	16.82	NP_666077.2 lcl|GPHN_4:8-2326_ORF1_GPHN_4:7:2325, XP_006515962.1, XP_006515963.1, XP_006515964.1, XP_006515965.1, XP_006515966.1, XP_006515967.1, XP_006515968.1 lcl|GPHN_38:8-2365_ORF1_GPHN_38:7:2364, XP_006515969.1 lcl|GPHN_3:8-2257_ORF1_GPHN_3:7:2256, XP_006515970.1 lcl|GPHN_1:8-2218_ORF1_GPHN_1:7:2217, XP_017170562.1, XP_017170563.1, XP_017170564.1, XP_017170565.1 lcl|GPHN_29:8-2323_ORF1_GPHN_…
AVVQVEDTE	AVVQVEDTE		18.4	988.471	0.6	495.243	21.82	NP_666077.2 lcl|GPHN_4:8-2326_ORF1_GPHN_4:7:2325, XP_006515962.1, XP_006515963.1, XP_006515964.1, XP_006515965.1, XP_006515966.1, XP_006515967.1, XP_006515968.1 lcl|GPHN_38:8-2365_ORF1_GPHN_38:7:2364, XP_006515969.1 lcl|GPHN_3:8-2257_ORF1_GPHN_3:7:2256, XP_006515970.1 lcl|GPHN_1:8-2218_ORF1_GPHN_1:7:2217, XP_017170562.1, XP_017170563.1, XP_017170564.1, XP_017170565.1 lcl|GPHN_29:8-2323_ORF1_GPHN_…
AVVQVEDTEL	AVVQVEDTEL		22.4	1101.56	0.9	551.785	27.65	NP_666077.2 lcl|GPHN_4:8-2326_ORF1_GPHN_4:7:2325, XP_006515962.1, XP_006515963.1, XP_006515964.1, XP_006515965.1, XP_006515966.1, XP_006515967.1, XP_006515968.1 lcl|GPHN_38:8-2365_ORF1_GPHN_38:7:2364, XP_006515969.1 lcl|GPHN_3:8-2257_ORF1_GPHN_3:7:2256, XP_006515970.1 lcl|GPHN_1:8-2218_ORF1_GPHN_1:7:2217, XP_017170562.1, XP_017170563.1, XP_017170564.1, XP_017170565.1 lcl|GPHN_29:8-2323_ORF1_GPHN_…
AVVQVEDTELIR	AVVQVEDTELIR		34.33	1370.74	-0.8	686.377	25.43	NP_666077.2 lcl|GPHN_4:8-2326_ORF1_GPHN_4:7:2325, XP_006515962.1, XP_006515963.1, XP_006515964.1, XP_006515965.1, XP_006515966.1, XP_006515967.1, XP_006515968.1 lcl|GPHN_38:8-2365_ORF1_GPHN_38:7:2364, XP_006515969.1 lcl|GPHN_3:8-2257_ORF1_GPHN_3:7:2256, XP_006515970.1 lcl|GPHN_1:8-2218_ORF1_GPHN_1:7:2217, XP_017170562.1, XP_017170563.1, XP_017170564.1, XP_017170565.1 lcl|GPHN_29:8-2323_ORF1_GPHN_…
AVVQVEDTELIRESDDGTEELEVR	AVVQVEDTELIRESDDGTEELEVR		40.64	2730.32	1	911.115	27.46	NP_666077.2 lcl|GPHN_4:8-2326_ORF1_GPHN_4:7:2325, XP_006515962.1, XP_006515963.1, XP_006515964.1, XP_006515965.1, XP_006515966.1, XP_006515967.1, XP_006515968.1 lcl|GPHN_38:8-2365_ORF1_GPHN_38:7:2364, XP_006515969.1 lcl|GPHN_3:8-2257_ORF1_GPHN_3:7:2256, XP_006515970.1 lcl|GPHN_1:8-2218_ORF1_GPHN_1:7:2217, XP_017170562.1, XP_017170563.1, XP_017170564.1, XP_017170565.1 lcl|GPHN_29:8-2323_ORF1_GPHN_…
AYKIVPDEIEEI	AYKIVPDEIEEI		34.22	1417.73	5.5	709.878	29.27	NP_666077.2 lcl|GPHN_4:8-2326_ORF1_GPHN_4:7:2325, XP_006515962.1, XP_006515963.1, XP_006515964.1, XP_006515965.1, XP_006515966.1, XP_006515967.1, XP_006515968.1 lcl|GPHN_38:8-2365_ORF1_GPHN_38:7:2364, XP_006515969.1 lcl|GPHN_3:8-2257_ORF1_GPHN_3:7:2256, XP_006515970.1 lcl|GPHN_1:8-2218_ORF1_GPHN_1:7:2217, XP_017170562.1, XP_017170563.1, XP_017170564.1, XP_017170565.1 lcl|GPHN_29:8-2323_ORF1_GPHN_…
AYKIVPDEIEEI	A(+42.01)YKIVPDEIEEI	A1:Acetylation (Protein N-term):1000.00	20.17	1459.74	0.6	730.88	32.51	NP_666077.2 lcl|GPHN_4:8-2326_ORF1_GPHN_4:7:2325, XP_006515962.1, XP_006515963.1, XP_006515964.1, XP_006515965.1, XP_006515966.1, XP_006515967.1, XP_006515968.1 lcl|GPHN_38:8-2365_ORF1_GPHN_38:7:2364, XP_006515969.1 lcl|GPHN_3:8-2257_ORF1_GPHN_3:7:2256, XP_006515970.1 lcl|GPHN_1:8-2218_ORF1_GPHN_1:7:2217, XP_017170562.1, XP_017170563.1, XP_017170564.1, XP_017170565.1 lcl|GPHN_29:8-2323_ORF1_GPHN_…
AYKIVPDEIEEIKET	AYKIVPDEIEEIKET		43.87	1775.92	2	888.969	25.66	NP_666077.2 lcl|GPHN_4:8-2326_ORF1_GPHN_4:7:2325, XP_006515962.1, XP_006515963.1, XP_006515964.1, XP_006515965.1, XP_006515966.1, XP_006515967.1, XP_006515968.1 lcl|GPHN_38:8-2365_ORF1_GPHN_38:7:2364, XP_006515969.1 lcl|GPHN_3:8-2257_ORF1_GPHN_3:7:2256, XP_006515970.1 lcl|GPHN_1:8-2218_ORF1_GPHN_1:7:2217, XP_017170562.1, XP_017170563.1, XP_017170564.1, XP_017170565.1 lcl|GPHN_29:8-2323_ORF1_GPHN_…
AYKIVPDEIEEIKET	A(+42.01)YKIVPDEIEEIKET	A1:Acetylation (Protein N-term):1000.00	42.09	1817.93	1.5	909.973	28.17	NP_666077.2 lcl|GPHN_4:8-2326_ORF1_GPHN_4:7:2325, XP_006515962.1, XP_006515963.1, XP_006515964.1, XP_006515965.1, XP_006515966.1, XP_006515967.1, XP_006515968.1 lcl|GPHN_38:8-2365_ORF1_GPHN_38:7:2364, XP_006515969.1 lcl|GPHN_3:8-2257_ORF1_GPHN_3:7:2256, XP_006515970.1 lcl|GPHN_1:8-2218_ORF1_GPHN_1:7:2217, XP_017170562.1, XP_017170563.1, XP_017170564.1, XP_017170565.1 lcl|GPHN_29:8-2323_ORF1_GPHN_…
CDVKLDPRPEYHR	C(+57.02)DVKLDPRPEYHR	C1:Carbamidomethylation:1000.00	49.59	1683.82	-0.7	421.961	17.09	NP_666077.2 lcl|GPHN_4:8-2326_ORF1_GPHN_4:7:2325, XP_006515962.1, XP_006515963.1, XP_006515964.1, XP_006515965.1, XP_006515966.1, XP_006515967.1, XP_006515968.1 lcl|GPHN_38:8-2365_ORF1_GPHN_38:7:2364, XP_006515969.1 lcl|GPHN_3:8-2257_ORF1_GPHN_3:7:2256, XP_006515970.1 lcl|GPHN_1:8-2218_ORF1_GPHN_1:7:2217, XP_017170562.1, XP_017170563.1, XP_017170564.1, XP_017170565.1 lcl|GPHN_29:8-2323_ORF1_GPHN_…
CDVKLDPRPEYHRCI	C(+57.02)DVKLDPRPEYHRC(+57.02)I	C1:Carbamidomethylation:1000.00;C14:Carbamidomethylation:1000.00	38.25	1956.93	-1.2	490.239	19.1	NP_666077.2 lcl|GPHN_4:8-2326_ORF1_GPHN_4:7:2325, XP_006515962.1, XP_006515963.1, XP_006515964.1, XP_006515965.1, XP_006515966.1, XP_006515967.1, XP_006515968.1 lcl|GPHN_38:8-2365_ORF1_GPHN_38:7:2364, XP_006515969.1 lcl|GPHN_3:8-2257_ORF1_GPHN_3:7:2256, XP_006515970.1 lcl|GPHN_1:8-2218_ORF1_GPHN_1:7:2217, XP_017170562.1, XP_017170563.1, XP_017170564.1, XP_017170565.1 lcl|GPHN_29:8-2323_ORF1_GPHN_…
CDVKLDPRPEYHRCIL	C(+57.02)DVKLDPRPEYHRC(+57.02)IL	C1:Carbamidomethylation:1000.00;C14:Carbamidomethylation:1000.00	25.3	2070.01	-0.1	518.511	21.35	NP_666077.2 lcl|GPHN_4:8-2326_ORF1_GPHN_4:7:2325, XP_006515962.1, XP_006515963.1, XP_006515964.1, XP_006515965.1, XP_006515966.1, XP_006515967.1, XP_006515968.1 lcl|GPHN_38:8-2365_ORF1_GPHN_38:7:2364, XP_006515969.1 lcl|GPHN_3:8-2257_ORF1_GPHN_3:7:2256, XP_006515970.1 lcl|GPHN_1:8-2218_ORF1_GPHN_1:7:2217, XP_017170562.1, XP_017170563.1, XP_017170564.1, XP_017170565.1 lcl|GPHN_29:8-2323_ORF1_GPHN_…
CDVKLDPRPEYHRCILT	C(+57.02)DVKLDPRPEYHRC(+57.02)ILT	C1:Carbamidomethylation:1000.00;C14:Carbamidomethylation:1000.00	29.79	2171.06	1.5	724.696	20.97	NP_666077.2 lcl|GPHN_4:8-2326_ORF1_GPHN_4:7:2325, XP_006515962.1, XP_006515963.1, XP_006515964.1, XP_006515965.1, XP_006515966.1, XP_006515967.1, XP_006515968.1 lcl|GPHN_38:8-2365_ORF1_GPHN_38:7:2364, XP_006515969.1 lcl|GPHN_3:8-2257_ORF1_GPHN_3:7:2256, XP_006515970.1 lcl|GPHN_1:8-2218_ORF1_GPHN_1:7:2217, XP_017170562.1, XP_017170563.1, XP_017170564.1, XP_017170565.1 lcl|GPHN_29:8-2323_ORF1_GPHN_…
CEEEEEEKKDSGVA	C(+57.02)EEEEEEKKDSGVA	C1:Carbamidomethylation:1000.00	35.3	1637.67	2.3	546.899	14.21	NP_666077.2 lcl|GPHN_4:8-2326_ORF1_GPHN_4:7:2325, XP_006515962.1, XP_006515963.1, XP_006515964.1, XP_006515965.1, XP_006515966.1, XP_006515967.1, XP_006515968.1 lcl|GPHN_38:8-2365_ORF1_GPHN_38:7:2364, XP_006515969.1 lcl|GPHN_3:8-2257_ORF1_GPHN_3:7:2256, XP_006515970.1 lcl|GPHN_1:8-2218_ORF1_GPHN_1:7:2217, XP_017170562.1, XP_017170563.1, XP_017170564.1, XP_017170565.1 lcl|GPHN_29:8-2323_ORF1_GPHN_…
CEEEEEEKKDSGVA	C(+57.02)EEEEEEKKDS(+79.97)GVA	C1:Carbamidomethylation:1000.00;S11:Phosphorylation (STY):1000.00	26.45	1717.64	-1.5	859.825	14.65	NP_666077.2 lcl|GPHN_4:8-2326_ORF1_GPHN_4:7:2325, XP_006515962.1, XP_006515963.1, XP_006515964.1, XP_006515965.1, XP_006515966.1, XP_006515967.1, XP_006515968.1 lcl|GPHN_38:8-2365_ORF1_GPHN_38:7:2364, XP_006515969.1 lcl|GPHN_3:8-2257_ORF1_GPHN_3:7:2256, XP_006515970.1 lcl|GPHN_1:8-2218_ORF1_GPHN_1:7:2217, XP_017170562.1, XP_017170563.1, XP_017170564.1, XP_017170565.1 lcl|GPHN_29:8-2323_ORF1_GPHN_…
CEEEEEEKKDSGVAS	C(+57.02)EEEEEEKKDSGVAS	C1:Carbamidomethylation:1000.00	28.43	1724.7	0.3	863.36	14.02	NP_666077.2 lcl|GPHN_4:8-2326_ORF1_GPHN_4:7:2325, XP_006515962.1, XP_006515963.1, XP_006515964.1, XP_006515965.1, XP_006515966.1, XP_006515967.1, XP_006515968.1 lcl|GPHN_38:8-2365_ORF1_GPHN_38:7:2364, XP_006515969.1 lcl|GPHN_3:8-2257_ORF1_GPHN_3:7:2256, XP_006515970.1 lcl|GPHN_1:8-2218_ORF1_GPHN_1:7:2217, XP_017170562.1, XP_017170563.1, XP_017170564.1, XP_017170565.1 lcl|GPHN_29:8-2323_ORF1_GPHN_…
CEEEEEEKKDSGVASTEDSSSSH	C(+57.02)EEEEEEKKDSGVASTEDSSSSH	C1:Carbamidomethylation:1000.00	47.81	2555.01	3.6	639.762	14.59	NP_666077.2 lcl|GPHN_4:8-2326_ORF1_GPHN_4:7:2325, XP_006515962.1, XP_006515963.1, XP_006515964.1, XP_006515965.1, XP_006515966.1, XP_006515967.1, XP_006515968.1 lcl|GPHN_38:8-2365_ORF1_GPHN_38:7:2364, XP_006515969.1 lcl|GPHN_3:8-2257_ORF1_GPHN_3:7:2256, XP_006515970.1 lcl|GPHN_1:8-2218_ORF1_GPHN_1:7:2217, XP_017170562.1, XP_017170563.1, XP_017170564.1, XP_017170565.1 lcl|GPHN_29:8-2323_ORF1_GPHN_…
CFRNLAEDRS	C(+57.02)FRNLAEDRS	C1:Carbamidomethylation:1000.00	27.94	1266.58	3.3	634.298	17.06	NP_666077.2 lcl|GPHN_4:8-2326_ORF1_GPHN_4:7:2325, XP_006515962.1, XP_006515963.1, XP_006515964.1, XP_006515965.1, XP_006515966.1, XP_006515967.1, XP_006515968.1 lcl|GPHN_38:8-2365_ORF1_GPHN_38:7:2364, XP_006515969.1 lcl|GPHN_3:8-2257_ORF1_GPHN_3:7:2256, XP_006515970.1 lcl|GPHN_1:8-2218_ORF1_GPHN_1:7:2217, XP_017170562.1, XP_017170563.1, XP_017170564.1, XP_017170565.1 lcl|GPHN_29:8-2323_ORF1_GPHN_…
CFRNLAEDRSGI	C(+57.02)FRNLAEDRSGI	C1:Carbamidomethylation:1000.00	37.21	1436.68	-1.3	479.901	20.92	NP_666077.2 lcl|GPHN_4:8-2326_ORF1_GPHN_4:7:2325, XP_006515962.1, XP_006515963.1, XP_006515964.1, XP_006515965.1, XP_006515966.1, XP_006515967.1, XP_006515968.1 lcl|GPHN_38:8-2365_ORF1_GPHN_38:7:2364, XP_006515969.1 lcl|GPHN_3:8-2257_ORF1_GPHN_3:7:2256, XP_006515970.1 lcl|GPHN_1:8-2218_ORF1_GPHN_1:7:2217, XP_017170562.1, XP_017170563.1, XP_017170564.1, XP_017170565.1 lcl|GPHN_29:8-2323_ORF1_GPHN_…
CFRNLAEDRSGINLKDLVQDPS	C(+57.02)FRNLAEDRSGINLKDLVQDPS	C1:Carbamidomethylation:1000.00	32.89	2546.25	0	637.571	26.82	NP_666077.2 lcl|GPHN_4:8-2326_ORF1_GPHN_4:7:2325, XP_006515962.1, XP_006515963.1, XP_006515964.1, XP_006515965.1, XP_006515966.1, XP_006515967.1, XP_006515968.1 lcl|GPHN_38:8-2365_ORF1_GPHN_38:7:2364, XP_006515969.1 lcl|GPHN_3:8-2257_ORF1_GPHN_3:7:2256, XP_006515970.1 lcl|GPHN_1:8-2218_ORF1_GPHN_1:7:2217, XP_017170562.1, XP_017170563.1, XP_017170564.1, XP_017170565.1 lcl|GPHN_29:8-2323_ORF1_GPHN_…
CGIRGKTL	C(+57.02)GIRGKTL	C1:Carbamidomethylation:1000.00	21.25	903.496	-0.8	452.755	14.41	NP_666077.2 lcl|GPHN_4:8-2326_ORF1_GPHN_4:7:2325, XP_006515962.1, XP_006515963.1, XP_006515964.1, XP_006515965.1, XP_006515966.1, XP_006515967.1, XP_006515968.1 lcl|GPHN_38:8-2365_ORF1_GPHN_38:7:2364, XP_006515969.1 lcl|GPHN_3:8-2257_ORF1_GPHN_3:7:2256, XP_006515970.1 lcl|GPHN_1:8-2218_ORF1_GPHN_1:7:2217, XP_017170562.1, XP_017170563.1, XP_017170564.1, XP_017170565.1 lcl|GPHN_29:8-2323_ORF1_GPHN_…
CGIRGKTLII	C(+57.02)GIRGKTLII	C1:Carbamidomethylation:1000.00	20.76	1129.66	-0.4	377.562	21.34	NP_666077.2 lcl|GPHN_4:8-2326_ORF1_GPHN_4:7:2325, XP_006515962.1, XP_006515963.1, XP_006515964.1, XP_006515965.1, XP_006515966.1, XP_006515967.1, XP_006515968.1 lcl|GPHN_38:8-2365_ORF1_GPHN_38:7:2364, XP_006515969.1 lcl|GPHN_3:8-2257_ORF1_GPHN_3:7:2256, XP_006515970.1 lcl|GPHN_1:8-2218_ORF1_GPHN_1:7:2217, XP_017170562.1, XP_017170563.1, XP_017170564.1, XP_017170565.1 lcl|GPHN_29:8-2323_ORF1_GPHN_…
CILTWHHQEPLPWAQ	C(+57.02)ILTWHHQEPLPWAQ	C1:Carbamidomethylation:1000.00	46.8	1914.92	0.9	639.314	28.36	NP_666077.2 lcl|GPHN_4:8-2326_ORF1_GPHN_4:7:2325, XP_006515962.1, XP_006515963.1, XP_006515964.1, XP_006515965.1, XP_006515966.1, XP_006515967.1, XP_006515968.1 lcl|GPHN_38:8-2365_ORF1_GPHN_38:7:2364, XP_006515969.1 lcl|GPHN_3:8-2257_ORF1_GPHN_3:7:2256, XP_006515970.1 lcl|GPHN_1:8-2218_ORF1_GPHN_1:7:2217, XP_017170562.1, XP_017170563.1, XP_017170564.1, XP_017170565.1 lcl|GPHN_29:8-2323_ORF1_GPHN_…
CILTWHHQEPLPWAQSTGN	C(+57.02)ILTWHHQEPLPWAQSTGN	C1:Carbamidomethylation:1000.00	43.98	2274.06	-0.1	759.029	27.99	NP_666077.2 lcl|GPHN_4:8-2326_ORF1_GPHN_4:7:2325, XP_006515962.1, XP_006515963.1, XP_006515964.1, XP_006515965.1, XP_006515966.1, XP_006515967.1, XP_006515968.1 lcl|GPHN_38:8-2365_ORF1_GPHN_38:7:2364, XP_006515969.1 lcl|GPHN_3:8-2257_ORF1_GPHN_3:7:2256, XP_006515970.1 lcl|GPHN_1:8-2218_ORF1_GPHN_1:7:2217, XP_017170562.1, XP_017170563.1, XP_017170564.1, XP_017170565.1 lcl|GPHN_29:8-2323_ORF1_GPHN_…
CILTWHHQEPLPWAQSTGNQM	C(+57.02)ILTWHHQEPLPWAQSTGNQM(+15.99)	C1:Carbamidomethylation:1000.00;M21:Oxidation (M):1000.00	43.04	2549.16	2	850.728	27.77	NP_666077.2 lcl|GPHN_4:8-2326_ORF1_GPHN_4:7:2325, XP_006515962.1, XP_006515963.1, XP_006515964.1, XP_006515965.1, XP_006515966.1, XP_006515967.1, XP_006515968.1 lcl|GPHN_38:8-2365_ORF1_GPHN_38:7:2364, XP_006515969.1 lcl|GPHN_3:8-2257_ORF1_GPHN_3:7:2256, XP_006515970.1 lcl|GPHN_1:8-2218_ORF1_GPHN_1:7:2217, XP_017170562.1, XP_017170563.1, XP_017170564.1, XP_017170565.1 lcl|GPHN_29:8-2323_ORF1_GPHN_…
CILTWHHQEPLPWAQSTGNQMS	C(+57.02)ILTWHHQEPLPWAQSTGNQM(+15.99)S	C1:Carbamidomethylation:1000.00;M21:Oxidation (M):1000.00	20.83	2636.19	0.9	879.738	27.45	NP_666077.2 lcl|GPHN_4:8-2326_ORF1_GPHN_4:7:2325, XP_006515962.1, XP_006515963.1, XP_006515964.1, XP_006515965.1, XP_006515966.1, XP_006515967.1, XP_006515968.1 lcl|GPHN_38:8-2365_ORF1_GPHN_38:7:2364, XP_006515969.1 lcl|GPHN_3:8-2257_ORF1_GPHN_3:7:2256, XP_006515970.1 lcl|GPHN_1:8-2218_ORF1_GPHN_1:7:2217, XP_017170562.1, XP_017170563.1, XP_017170564.1, XP_017170565.1 lcl|GPHN_29:8-2323_ORF1_GPHN_…
CILTWHHQEPLPWAQSTGNQMSSR	C(+57.02)ILTWHHQEPLPWAQSTGNQMSSR	C1:Carbamidomethylation:1000.00	68.98	2863.33	1.9	716.841	25.93	NP_666077.2 lcl|GPHN_4:8-2326_ORF1_GPHN_4:7:2325, XP_006515962.1, XP_006515963.1, XP_006515964.1, XP_006515965.1, XP_006515966.1, XP_006515967.1, XP_006515968.1 lcl|GPHN_38:8-2365_ORF1_GPHN_38:7:2364, XP_006515969.1 lcl|GPHN_3:8-2257_ORF1_GPHN_3:7:2256, XP_006515970.1 lcl|GPHN_1:8-2218_ORF1_GPHN_1:7:2217, XP_017170562.1, XP_017170563.1, XP_017170564.1, XP_017170565.1 lcl|GPHN_29:8-2323_ORF1_GPHN_…
CILTWHHQEPLPWAQSTGNQMSSR	C(+57.02)ILTWHHQEPLPWAQSTGNQM(+15.99)SSR	C1:Carbamidomethylation:1000.00;M21:Oxidation (M):1000.00	64.34	2879.32	1.5	960.783	25.13	NP_666077.2 lcl|GPHN_4:8-2326_ORF1_GPHN_4:7:2325, XP_006515962.1, XP_006515963.1, XP_006515964.1, XP_006515965.1, XP_006515966.1, XP_006515967.1, XP_006515968.1 lcl|GPHN_38:8-2365_ORF1_GPHN_38:7:2364, XP_006515969.1 lcl|GPHN_3:8-2257_ORF1_GPHN_3:7:2256, XP_006515970.1 lcl|GPHN_1:8-2218_ORF1_GPHN_1:7:2217, XP_017170562.1, XP_017170563.1, XP_017170564.1, XP_017170565.1 lcl|GPHN_29:8-2323_ORF1_GPHN_…
CILTWHHQEPLPWAQSTGNQMSSR	CILTWHHQEPLPWAQS(+79.97)TGNQM(+15.99)SSR	S16:Phosphorylation (STY):11.06;M21:Oxidation (M):1000.00	51.78	2902.27	-0.9	968.429	28.32	NP_666077.2 lcl|GPHN_4:8-2326_ORF1_GPHN_4:7:2325, XP_006515962.1, XP_006515963.1, XP_006515964.1, XP_006515965.1, XP_006515966.1, XP_006515967.1, XP_006515968.1 lcl|GPHN_38:8-2365_ORF1_GPHN_38:7:2364, XP_006515969.1 lcl|GPHN_3:8-2257_ORF1_GPHN_3:7:2256, XP_006515970.1 lcl|GPHN_1:8-2218_ORF1_GPHN_1:7:2217, XP_017170562.1, XP_017170563.1, XP_017170564.1, XP_017170565.1 lcl|GPHN_29:8-2323_ORF1_GPHN_…
CNLFVVPA	C(+57.02)NLFVVPA	C1:Carbamidomethylation:1000.00	28.11	918.463	-0.2	460.239	32.19	NP_666077.2 lcl|GPHN_4:8-2326_ORF1_GPHN_4:7:2325, XP_006515962.1, XP_006515963.1, XP_006515964.1, XP_006515965.1, XP_006515966.1, XP_006515967.1, XP_006515968.1 lcl|GPHN_38:8-2365_ORF1_GPHN_38:7:2364, XP_006515969.1 lcl|GPHN_3:8-2257_ORF1_GPHN_3:7:2256, XP_006515970.1 lcl|GPHN_1:8-2218_ORF1_GPHN_1:7:2217, XP_017170562.1, XP_017170563.1, XP_017170564.1, XP_017170565.1 lcl|GPHN_29:8-2323_ORF1_GPHN_…
CNLFVVPAL	C(+57.02)NLFVVPAL	C1:Carbamidomethylation:1000.00	29.41	1031.55	-0.1	516.781	37.04	NP_666077.2 lcl|GPHN_4:8-2326_ORF1_GPHN_4:7:2325, XP_006515962.1, XP_006515963.1, XP_006515964.1, XP_006515965.1, XP_006515966.1, XP_006515967.1, XP_006515968.1 lcl|GPHN_38:8-2365_ORF1_GPHN_38:7:2364, XP_006515969.1 lcl|GPHN_3:8-2257_ORF1_GPHN_3:7:2256, XP_006515970.1 lcl|GPHN_1:8-2218_ORF1_GPHN_1:7:2217, XP_017170562.1, XP_017170563.1, XP_017170564.1, XP_017170565.1 lcl|GPHN_29:8-2323_ORF1_GPHN_…
CNLFVVPALR	C(+57.02)NLFVVPALR	C1:Carbamidomethylation:1000.00	35.51	1187.65	-0.1	594.831	30.16	NP_666077.2 lcl|GPHN_4:8-2326_ORF1_GPHN_4:7:2325, XP_006515962.1, XP_006515963.1, XP_006515964.1, XP_006515965.1, XP_006515966.1, XP_006515967.1, XP_006515968.1 lcl|GPHN_38:8-2365_ORF1_GPHN_38:7:2364, XP_006515969.1 lcl|GPHN_3:8-2257_ORF1_GPHN_3:7:2256, XP_006515970.1 lcl|GPHN_1:8-2218_ORF1_GPHN_1:7:2217, XP_017170562.1, XP_017170563.1, XP_017170564.1, XP_017170565.1 lcl|GPHN_29:8-2323_ORF1_GPHN_…
CPTPKQI	C(+57.02)PTPKQI	C1:Carbamidomethylation:1000.00	23.18	842.432	-2.2	422.222	15.86	XP_006515962.1, XP_006515963.1, XP_006515964.1, XP_006515965.1, XP_006515966.1, XP_006515967.1, XP_017170564.1, XP_017170566.1, XP_017170567.1, XP_017170568.1, lcl|GPHN_103:8-2287_ORF1_GPHN_103:7:2286, lcl|GPHN_117:8-2179_ORF1_GPHN_117:7:2178, lcl|GPHN_120:8-2125_ORF1_GPHN_120:7:2124, lcl|GPHN_123:8-2149_ORF1_GPHN_123:7:2148, lcl|GPHN_12:8-2380_ORF1_GPHN_12:7:2379, lcl|GPHN_130:8-1864_ORF1_GPHN_1…
CSSKENIL	C(+57.02)SSKENIL	C1:Carbamidomethylation:1000.00	32.52	949.454	0.1	475.734	17.99	NP_666077.2 lcl|GPHN_4:8-2326_ORF1_GPHN_4:7:2325, XP_006515962.1, XP_006515963.1, XP_006515964.1, XP_006515965.1, XP_006515966.1, XP_006515967.1, XP_006515968.1 lcl|GPHN_38:8-2365_ORF1_GPHN_38:7:2364, XP_006515969.1 lcl|GPHN_3:8-2257_ORF1_GPHN_3:7:2256, XP_006515970.1 lcl|GPHN_1:8-2218_ORF1_GPHN_1:7:2217, XP_017170562.1, XP_017170563.1, XP_017170564.1, XP_017170565.1 lcl|GPHN_29:8-2323_ORF1_GPHN_…
CSSKENIL	C(+57.02)(+42.01)SSKENIL	C1:Carbamidomethylation:1000.00;C1:Acetylation (Protein N-term):1000.00	22.39	991.464	-3.1	496.738	22.91	NP_666077.2 lcl|GPHN_4:8-2326_ORF1_GPHN_4:7:2325, XP_006515962.1, XP_006515963.1, XP_006515964.1, XP_006515965.1, XP_006515966.1, XP_006515967.1, XP_006515968.1 lcl|GPHN_38:8-2365_ORF1_GPHN_38:7:2364, XP_006515969.1 lcl|GPHN_3:8-2257_ORF1_GPHN_3:7:2256, XP_006515970.1 lcl|GPHN_1:8-2218_ORF1_GPHN_1:7:2217, XP_017170562.1, XP_017170563.1, XP_017170564.1, XP_017170565.1 lcl|GPHN_29:8-2323_ORF1_GPHN_…
CSSKENILR	C(+57.02)SSKENILR	C1:Carbamidomethylation:1000.00	37.63	1105.55	-0.9	553.784	14.45	NP_666077.2 lcl|GPHN_4:8-2326_ORF1_GPHN_4:7:2325, XP_006515962.1, XP_006515963.1, XP_006515964.1, XP_006515965.1, XP_006515966.1, XP_006515967.1, XP_006515968.1 lcl|GPHN_38:8-2365_ORF1_GPHN_38:7:2364, XP_006515969.1 lcl|GPHN_3:8-2257_ORF1_GPHN_3:7:2256, XP_006515970.1 lcl|GPHN_1:8-2218_ORF1_GPHN_1:7:2217, XP_017170562.1, XP_017170563.1, XP_017170564.1, XP_017170565.1 lcl|GPHN_29:8-2323_ORF1_GPHN_…
CSSKENILR	C(+57.02)SS(+79.97)KENILR	C1:Carbamidomethylation:1000.00;S3:Phosphorylation (STY):10.11	30.34	1185.52	0	593.768	17.14	NP_666077.2 lcl|GPHN_4:8-2326_ORF1_GPHN_4:7:2325, XP_006515962.1, XP_006515963.1, XP_006515964.1, XP_006515965.1, XP_006515966.1, XP_006515967.1, XP_006515968.1 lcl|GPHN_38:8-2365_ORF1_GPHN_38:7:2364, XP_006515969.1 lcl|GPHN_3:8-2257_ORF1_GPHN_3:7:2256, XP_006515970.1 lcl|GPHN_1:8-2218_ORF1_GPHN_1:7:2217, XP_017170562.1, XP_017170563.1, XP_017170564.1, XP_017170565.1 lcl|GPHN_29:8-2323_ORF1_GPHN_…
CSSKENILRA	C(+57.02)SSKENILRA	C1:Carbamidomethylation:1000.00	37.18	1176.59	-0.2	589.303	15.83	NP_666077.2 lcl|GPHN_4:8-2326_ORF1_GPHN_4:7:2325, XP_006515962.1, XP_006515963.1, XP_006515964.1, XP_006515965.1, XP_006515966.1, XP_006515967.1, XP_006515968.1 lcl|GPHN_38:8-2365_ORF1_GPHN_38:7:2364, XP_006515969.1 lcl|GPHN_3:8-2257_ORF1_GPHN_3:7:2256, XP_006515970.1 lcl|GPHN_1:8-2218_ORF1_GPHN_1:7:2217, XP_017170562.1, XP_017170563.1, XP_017170564.1, XP_017170565.1 lcl|GPHN_29:8-2323_ORF1_GPHN_…
CSSKENILRA	C(+57.02)(+42.01)SSKENILRA	C1:Carbamidomethylation:1000.00;C1:Acetylation (Protein N-term):1000.00	30.39	1218.6	0.8	610.309	19.28	NP_666077.2 lcl|GPHN_4:8-2326_ORF1_GPHN_4:7:2325, XP_006515962.1, XP_006515963.1, XP_006515964.1, XP_006515965.1, XP_006515966.1, XP_006515967.1, XP_006515968.1 lcl|GPHN_38:8-2365_ORF1_GPHN_38:7:2364, XP_006515969.1 lcl|GPHN_3:8-2257_ORF1_GPHN_3:7:2256, XP_006515970.1 lcl|GPHN_1:8-2218_ORF1_GPHN_1:7:2217, XP_017170562.1, XP_017170563.1, XP_017170564.1, XP_017170565.1 lcl|GPHN_29:8-2323_ORF1_GPHN_…
CSSKENILRA	C(+57.02)SS(+79.97)KENILRA	C1:Carbamidomethylation:1000.00;S3:Phosphorylation (STY):0.00	24.25	1256.56	-0.6	629.286	18.93	NP_666077.2 lcl|GPHN_4:8-2326_ORF1_GPHN_4:7:2325, XP_006515962.1, XP_006515963.1, XP_006515964.1, XP_006515965.1, XP_006515966.1, XP_006515967.1, XP_006515968.1 lcl|GPHN_38:8-2365_ORF1_GPHN_38:7:2364, XP_006515969.1 lcl|GPHN_3:8-2257_ORF1_GPHN_3:7:2256, XP_006515970.1 lcl|GPHN_1:8-2218_ORF1_GPHN_1:7:2217, XP_017170562.1, XP_017170563.1, XP_017170564.1, XP_017170565.1 lcl|GPHN_29:8-2323_ORF1_GPHN_…
CSSKENILRAS	C(+57.02)SSKENILRAS	C1:Carbamidomethylation:1000.00	18.57	1263.62	-0.3	422.215	15.71	NP_666077.2 lcl|GPHN_4:8-2326_ORF1_GPHN_4:7:2325, XP_006515962.1, XP_006515963.1, XP_006515964.1, XP_006515965.1, XP_006515966.1, XP_006515967.1, XP_006515968.1 lcl|GPHN_38:8-2365_ORF1_GPHN_38:7:2364, XP_006515969.1 lcl|GPHN_3:8-2257_ORF1_GPHN_3:7:2256, XP_006515970.1 lcl|GPHN_1:8-2218_ORF1_GPHN_1:7:2217, XP_017170562.1, XP_017170563.1, XP_017170564.1, XP_017170565.1 lcl|GPHN_29:8-2323_ORF1_GPHN_…
DAIVKVK	DAIVKVK		19.28	771.485	-1.7	386.749	15.4	NP_666077.2 lcl|GPHN_4:8-2326_ORF1_GPHN_4:7:2325, XP_006515962.1, XP_006515963.1, XP_006515964.1, XP_006515965.1, XP_006515966.1, XP_006515967.1, XP_006515968.1 lcl|GPHN_38:8-2365_ORF1_GPHN_38:7:2364, XP_006515969.1 lcl|GPHN_3:8-2257_ORF1_GPHN_3:7:2256, XP_006515970.1 lcl|GPHN_1:8-2218_ORF1_GPHN_1:7:2217, XP_017170562.1, XP_017170563.1, XP_017170564.1, XP_017170565.1 lcl|GPHN_29:8-2323_ORF1_GPHN_…
DAVVQVEDTELI	DAVVQVEDTELI		35.62	1329.67	0.1	665.841	34.47	NP_666077.2 lcl|GPHN_4:8-2326_ORF1_GPHN_4:7:2325, XP_006515962.1, XP_006515963.1, XP_006515964.1, XP_006515965.1, XP_006515966.1, XP_006515967.1, XP_006515968.1 lcl|GPHN_38:8-2365_ORF1_GPHN_38:7:2364, XP_006515969.1 lcl|GPHN_3:8-2257_ORF1_GPHN_3:7:2256, XP_006515970.1 lcl|GPHN_1:8-2218_ORF1_GPHN_1:7:2217, XP_017170562.1, XP_017170563.1, XP_017170564.1, XP_017170565.1 lcl|GPHN_29:8-2323_ORF1_GPHN_…
DELEDLPSPPPPL	DELEDLPS(+79.97)PPPPL	S8:Phosphorylation (STY):1000.00	28.56	1497.66	-0.3	749.839	40.38	NP_666077.2 lcl|GPHN_4:8-2326_ORF1_GPHN_4:7:2325, XP_006515962.1, XP_006515963.1, XP_006515964.1, XP_006515965.1, XP_006515966.1, XP_006515967.1, XP_006515968.1 lcl|GPHN_38:8-2365_ORF1_GPHN_38:7:2364, XP_006515969.1 lcl|GPHN_3:8-2257_ORF1_GPHN_3:7:2256, XP_006515970.1 lcl|GPHN_1:8-2218_ORF1_GPHN_1:7:2217, XP_017170562.1, XP_017170563.1, XP_017170564.1, XP_017170565.1 lcl|GPHN_29:8-2323_ORF1_GPHN_…
DGMGRVLAQDVYAKDNLPPFPA	DGM(+15.99)GRVLAQDVYAKDNLPPFPA	M3:Oxidation (M):1000.00	29.52	2389.17	2	797.4	28.74	NP_666077.2 lcl|GPHN_4:8-2326_ORF1_GPHN_4:7:2325, XP_006515962.1, XP_006515963.1, XP_006515964.1, XP_006515965.1, XP_006515966.1, XP_006515967.1, XP_006515968.1 lcl|GPHN_38:8-2365_ORF1_GPHN_38:7:2364, XP_006515969.1 lcl|GPHN_3:8-2257_ORF1_GPHN_3:7:2256, XP_006515970.1 lcl|GPHN_1:8-2218_ORF1_GPHN_1:7:2217, XP_017170562.1, XP_017170563.1, XP_017170564.1, XP_017170565.1 lcl|GPHN_29:8-2323_ORF1_GPHN_…
DGPGDRFI	DGPGDRFI		25.89	875.414	-0.1	438.714	24.44	NP_666077.2 lcl|GPHN_4:8-2326_ORF1_GPHN_4:7:2325, XP_006515962.1, XP_006515963.1, XP_006515964.1, XP_006515965.1, XP_006515966.1, XP_006515967.1, XP_006515968.1 lcl|GPHN_38:8-2365_ORF1_GPHN_38:7:2364, XP_006515969.1 lcl|GPHN_3:8-2257_ORF1_GPHN_3:7:2256, XP_006515970.1 lcl|GPHN_1:8-2218_ORF1_GPHN_1:7:2217, XP_017170562.1, XP_017170563.1, XP_017170564.1, XP_017170565.1 lcl|GPHN_29:8-2323_ORF1_GPHN_…
DGPGDRFIIG	DGPGDRFIIG		34.1	1045.52	0.4	523.767	27.83	NP_666077.2 lcl|GPHN_4:8-2326_ORF1_GPHN_4:7:2325, XP_006515962.1, XP_006515963.1, XP_006515964.1, XP_006515965.1, XP_006515966.1, XP_006515967.1, XP_006515968.1 lcl|GPHN_38:8-2365_ORF1_GPHN_38:7:2364, XP_006515969.1 lcl|GPHN_3:8-2257_ORF1_GPHN_3:7:2256, XP_006515970.1 lcl|GPHN_1:8-2218_ORF1_GPHN_1:7:2217, XP_017170562.1, XP_017170563.1, XP_017170564.1, XP_017170565.1 lcl|GPHN_29:8-2323_ORF1_GPHN_…
DGPGDRFIIGE	DGPGDRFIIGE		35.5	1174.56	1.1	588.289	27.86	NP_666077.2 lcl|GPHN_4:8-2326_ORF1_GPHN_4:7:2325, XP_006515962.1, XP_006515963.1, XP_006515964.1, XP_006515965.1, XP_006515966.1, XP_006515967.1, XP_006515968.1 lcl|GPHN_38:8-2365_ORF1_GPHN_38:7:2364, XP_006515969.1 lcl|GPHN_3:8-2257_ORF1_GPHN_3:7:2256, XP_006515970.1 lcl|GPHN_1:8-2218_ORF1_GPHN_1:7:2217, XP_017170562.1, XP_017170563.1, XP_017170564.1, XP_017170565.1 lcl|GPHN_29:8-2323_ORF1_GPHN_…
DGPGDRFIIGES	DGPGDRFIIGES		36.77	1261.59	1.2	631.805	27.34	NP_666077.2 lcl|GPHN_4:8-2326_ORF1_GPHN_4:7:2325, XP_006515962.1, XP_006515963.1, XP_006515964.1, XP_006515965.1, XP_006515966.1, XP_006515967.1, XP_006515968.1 lcl|GPHN_38:8-2365_ORF1_GPHN_38:7:2364, XP_006515969.1 lcl|GPHN_3:8-2257_ORF1_GPHN_3:7:2256, XP_006515970.1 lcl|GPHN_1:8-2218_ORF1_GPHN_1:7:2217, XP_017170562.1, XP_017170563.1, XP_017170564.1, XP_017170565.1 lcl|GPHN_29:8-2323_ORF1_GPHN_…
DGPGDRFIIGESQ	DGPGDRFIIGESQ		25.56	1389.65	0.2	695.834	26.97	NP_666077.2 lcl|GPHN_4:8-2326_ORF1_GPHN_4:7:2325, XP_006515962.1, XP_006515963.1, XP_006515964.1, XP_006515965.1, XP_006515966.1, XP_006515967.1, XP_006515968.1 lcl|GPHN_38:8-2365_ORF1_GPHN_38:7:2364, XP_006515969.1 lcl|GPHN_3:8-2257_ORF1_GPHN_3:7:2256, XP_006515970.1 lcl|GPHN_1:8-2218_ORF1_GPHN_1:7:2217, XP_017170562.1, XP_017170563.1, XP_017170564.1, XP_017170565.1 lcl|GPHN_29:8-2323_ORF1_GPHN_…
DGPGDRFIIGESQA	DGPGDRFIIGESQA		34.36	1460.69	-0.2	731.352	27.12	NP_666077.2 lcl|GPHN_4:8-2326_ORF1_GPHN_4:7:2325, XP_006515962.1, XP_006515963.1, XP_006515964.1, XP_006515965.1, XP_006515966.1, XP_006515967.1, XP_006515968.1 lcl|GPHN_38:8-2365_ORF1_GPHN_38:7:2364, XP_006515969.1 lcl|GPHN_3:8-2257_ORF1_GPHN_3:7:2256, XP_006515970.1 lcl|GPHN_1:8-2218_ORF1_GPHN_1:7:2217, XP_017170562.1, XP_017170563.1, XP_017170564.1, XP_017170565.1 lcl|GPHN_29:8-2323_ORF1_GPHN_…
DGPGDRFIIGESQAGEQPT	DGPGDRFIIGESQAGEQPT		48.67	1972.91	-0.8	987.463	27.07	NP_666077.2 lcl|GPHN_4:8-2326_ORF1_GPHN_4:7:2325, XP_006515962.1, XP_006515963.1, XP_006515964.1, XP_006515965.1, XP_006515966.1, XP_006515967.1, XP_006515968.1 lcl|GPHN_38:8-2365_ORF1_GPHN_38:7:2364, XP_006515969.1 lcl|GPHN_3:8-2257_ORF1_GPHN_3:7:2256, XP_006515970.1 lcl|GPHN_1:8-2218_ORF1_GPHN_1:7:2217, XP_017170562.1, XP_017170563.1, XP_017170564.1, XP_017170565.1 lcl|GPHN_29:8-2323_ORF1_GPHN_…
DGPGDRFIIGESQAGEQPTQT	DGPGDRFIIGESQAGEQPTQT		43.75	2202.02	-2.5	1102.01	26.87	NP_666077.2 lcl|GPHN_4:8-2326_ORF1_GPHN_4:7:2325, XP_006515962.1, XP_006515963.1, XP_006515964.1, XP_006515965.1, XP_006515966.1, XP_006515967.1, XP_006515968.1 lcl|GPHN_38:8-2365_ORF1_GPHN_38:7:2364, XP_006515969.1 lcl|GPHN_3:8-2257_ORF1_GPHN_3:7:2256, XP_006515970.1 lcl|GPHN_1:8-2218_ORF1_GPHN_1:7:2217, XP_017170562.1, XP_017170563.1, XP_017170564.1, XP_017170565.1 lcl|GPHN_29:8-2323_ORF1_GPHN_…
DGPGDRFIIGESQAGEQPTQTV	DGPGDRFIIGESQAGEQPTQTV		32.75	2301.09	0.7	1151.55	28.43	NP_666077.2 lcl|GPHN_4:8-2326_ORF1_GPHN_4:7:2325, XP_006515962.1, XP_006515963.1, XP_006515964.1, XP_006515965.1, XP_006515966.1, XP_006515967.1, XP_006515968.1 lcl|GPHN_38:8-2365_ORF1_GPHN_38:7:2364, XP_006515969.1 lcl|GPHN_3:8-2257_ORF1_GPHN_3:7:2256, XP_006515970.1 lcl|GPHN_1:8-2218_ORF1_GPHN_1:7:2217, XP_017170562.1, XP_017170563.1, XP_017170564.1, XP_017170565.1 lcl|GPHN_29:8-2323_ORF1_GPHN_…
DGPGDRFIIGESQAGEQPTQTVMPG	DGPGDRFIIGESQAGEQPTQTVM(+15.99)PG	M23:Oxidation (M):1000.00	34.13	2602.2	0.6	868.407	27.93	NP_666077.2 lcl|GPHN_4:8-2326_ORF1_GPHN_4:7:2325, XP_006515962.1, XP_006515963.1, XP_006515964.1, XP_006515965.1, XP_006515966.1, XP_006515967.1, XP_006515968.1 lcl|GPHN_38:8-2365_ORF1_GPHN_38:7:2364, XP_006515969.1 lcl|GPHN_3:8-2257_ORF1_GPHN_3:7:2256, XP_006515970.1 lcl|GPHN_1:8-2218_ORF1_GPHN_1:7:2217, XP_017170562.1, XP_017170563.1, XP_017170564.1, XP_017170565.1 lcl|GPHN_29:8-2323_ORF1_GPHN_…
DGPGDRFIIGESQAGEQPTQTVMPGQV	DGPGDRFIIGESQAGEQPTQTVM(+15.99)PGQV	M23:Oxidation (M):1000.00	42.99	2829.32	0	944.115	29.07	NP_666077.2 lcl|GPHN_4:8-2326_ORF1_GPHN_4:7:2325, XP_006515962.1, XP_006515963.1, XP_006515964.1, XP_006515965.1, XP_006515966.1, XP_006515967.1, XP_006515968.1 lcl|GPHN_38:8-2365_ORF1_GPHN_38:7:2364, XP_006515969.1 lcl|GPHN_3:8-2257_ORF1_GPHN_3:7:2256, XP_006515970.1 lcl|GPHN_1:8-2218_ORF1_GPHN_1:7:2217, XP_017170562.1, XP_017170563.1, XP_017170564.1, XP_017170565.1 lcl|GPHN_29:8-2323_ORF1_GPHN_…
DGPGDRFIIGESQAGEQPTQTVMPGQVM	DGPGDRFIIGESQAGEQPTQTVM(+15.99)PGQVM(+15.99)	M23:Oxidation (M):1000.00;M28:Oxidation (M):1000.00	43.49	2976.36	1.1	993.128	28.49	NP_666077.2 lcl|GPHN_4:8-2326_ORF1_GPHN_4:7:2325, XP_006515962.1, XP_006515963.1, XP_006515964.1, XP_006515965.1, XP_006515966.1, XP_006515967.1, XP_006515968.1 lcl|GPHN_38:8-2365_ORF1_GPHN_38:7:2364, XP_006515969.1 lcl|GPHN_3:8-2257_ORF1_GPHN_3:7:2256, XP_006515970.1 lcl|GPHN_1:8-2218_ORF1_GPHN_1:7:2217, XP_017170562.1, XP_017170563.1, XP_017170564.1, XP_017170565.1 lcl|GPHN_29:8-2323_ORF1_GPHN_…
DGPGDRFIIGESQAGEQPTQTVMPGQVM	DGPGDRFIIGESQAGEQPTQTVM(+15.99)PGQVM	M23:Oxidation (M):23.70	35.13	2960.36	0.5	987.796	30.42	NP_666077.2 lcl|GPHN_4:8-2326_ORF1_GPHN_4:7:2325, XP_006515962.1, XP_006515963.1, XP_006515964.1, XP_006515965.1, XP_006515966.1, XP_006515967.1, XP_006515968.1 lcl|GPHN_38:8-2365_ORF1_GPHN_38:7:2364, XP_006515969.1 lcl|GPHN_3:8-2257_ORF1_GPHN_3:7:2256, XP_006515970.1 lcl|GPHN_1:8-2218_ORF1_GPHN_1:7:2217, XP_017170562.1, XP_017170563.1, XP_017170564.1, XP_017170565.1 lcl|GPHN_29:8-2323_ORF1_GPHN_…
DGPGDRFIIGESQAGEQPTQTVMPGQVMRV	DGPGDRFIIGESQAGEQPTQTVM(+15.99)PGQVM(+15.99)RV	M23:Oxidation (M):1000.00;M28:Oxidation (M):1000.00	57.15	3231.53	-1	1078.18	26.38	NP_666077.2 lcl|GPHN_4:8-2326_ORF1_GPHN_4:7:2325, XP_006515962.1, XP_006515963.1, XP_006515964.1, XP_006515965.1, XP_006515966.1, XP_006515967.1, XP_006515968.1 lcl|GPHN_38:8-2365_ORF1_GPHN_38:7:2364, XP_006515969.1 lcl|GPHN_3:8-2257_ORF1_GPHN_3:7:2256, XP_006515970.1 lcl|GPHN_1:8-2218_ORF1_GPHN_1:7:2217, XP_017170562.1, XP_017170563.1, XP_017170564.1, XP_017170565.1 lcl|GPHN_29:8-2323_ORF1_GPHN_…
DGTEELEVR	DGTEELEVR		30.61	1046.49	-0.6	524.251	20.82	NP_666077.2 lcl|GPHN_4:8-2326_ORF1_GPHN_4:7:2325, XP_006515962.1, XP_006515963.1, XP_006515964.1, XP_006515965.1, XP_006515966.1, XP_006515967.1, XP_006515968.1 lcl|GPHN_38:8-2365_ORF1_GPHN_38:7:2364, XP_006515969.1 lcl|GPHN_3:8-2257_ORF1_GPHN_3:7:2256, XP_006515970.1 lcl|GPHN_1:8-2218_ORF1_GPHN_1:7:2217, XP_017170562.1, XP_017170563.1, XP_017170564.1, XP_017170565.1 lcl|GPHN_29:8-2323_ORF1_GPHN_…
DIDGVRKI	DIDGVRKI		20.21	914.519	0	458.267	18.2	NP_666077.2 lcl|GPHN_4:8-2326_ORF1_GPHN_4:7:2325, XP_006515962.1, XP_006515963.1, XP_006515964.1, XP_006515965.1, XP_006515966.1, XP_006515967.1, XP_006515968.1 lcl|GPHN_38:8-2365_ORF1_GPHN_38:7:2364, XP_006515969.1 lcl|GPHN_3:8-2257_ORF1_GPHN_3:7:2256, XP_006515970.1 lcl|GPHN_1:8-2218_ORF1_GPHN_1:7:2217, XP_017170562.1, XP_017170563.1, XP_017170564.1, XP_017170565.1 lcl|GPHN_29:8-2323_ORF1_GPHN_…
DIDLHAQ	DIDLHAQ		21.52	810.387	-0.7	406.201	20.6	NP_666077.2 lcl|GPHN_4:8-2326_ORF1_GPHN_4:7:2325, XP_006515962.1, XP_006515963.1, XP_006515964.1, XP_006515965.1, XP_006515966.1, XP_006515967.1, XP_006515968.1 lcl|GPHN_38:8-2365_ORF1_GPHN_38:7:2364, XP_006515969.1 lcl|GPHN_3:8-2257_ORF1_GPHN_3:7:2256, XP_006515970.1 lcl|GPHN_1:8-2218_ORF1_GPHN_1:7:2217, XP_017170562.1, XP_017170563.1, XP_017170564.1, XP_017170565.1 lcl|GPHN_29:8-2323_ORF1_GPHN_…
DIDLHAQI	DIDLHAQI		28.12	923.471	-0.9	462.743	26.73	NP_666077.2 lcl|GPHN_4:8-2326_ORF1_GPHN_4:7:2325, XP_006515962.1, XP_006515963.1, XP_006515964.1, XP_006515965.1, XP_006515966.1, XP_006515967.1, XP_006515968.1 lcl|GPHN_38:8-2365_ORF1_GPHN_38:7:2364, XP_006515969.1 lcl|GPHN_3:8-2257_ORF1_GPHN_3:7:2256, XP_006515970.1 lcl|GPHN_1:8-2218_ORF1_GPHN_1:7:2217, XP_017170562.1, XP_017170563.1, XP_017170564.1, XP_017170565.1 lcl|GPHN_29:8-2323_ORF1_GPHN_…
DKGVQCEEEEEEKK	DKGVQC(+57.02)EEEEEEKK	C6:Carbamidomethylation:1000.00	43.38	1735.76	-0.3	579.593	13.21	NP_666077.2 lcl|GPHN_4:8-2326_ORF1_GPHN_4:7:2325, XP_006515962.1, XP_006515963.1, XP_006515964.1, XP_006515965.1, XP_006515966.1, XP_006515967.1, XP_006515968.1 lcl|GPHN_38:8-2365_ORF1_GPHN_38:7:2364, XP_006515969.1 lcl|GPHN_3:8-2257_ORF1_GPHN_3:7:2256, XP_006515970.1 lcl|GPHN_1:8-2218_ORF1_GPHN_1:7:2217, XP_017170562.1, XP_017170563.1, XP_017170564.1, XP_017170565.1 lcl|GPHN_29:8-2323_ORF1_GPHN_…
DKGVQCEEEEEEKKD	DKGVQC(+57.02)EEEEEEKKD	C6:Carbamidomethylation:1000.00	46.36	1850.78	-0.7	617.935	13.68	NP_666077.2 lcl|GPHN_4:8-2326_ORF1_GPHN_4:7:2325, XP_006515962.1, XP_006515963.1, XP_006515964.1, XP_006515965.1, XP_006515966.1, XP_006515967.1, XP_006515968.1 lcl|GPHN_38:8-2365_ORF1_GPHN_38:7:2364, XP_006515969.1 lcl|GPHN_3:8-2257_ORF1_GPHN_3:7:2256, XP_006515970.1 lcl|GPHN_1:8-2218_ORF1_GPHN_1:7:2217, XP_017170562.1, XP_017170563.1, XP_017170564.1, XP_017170565.1 lcl|GPHN_29:8-2323_ORF1_GPHN_…
DKGVQCEEEEEEKKDSG	DKGVQC(+57.02)EEEEEEKKDSG	C6:Carbamidomethylation:1000.00	47.25	1994.84	3.1	665.955	14.19	NP_666077.2 lcl|GPHN_4:8-2326_ORF1_GPHN_4:7:2325, XP_006515962.1, XP_006515963.1, XP_006515964.1, XP_006515965.1, XP_006515966.1, XP_006515967.1, XP_006515968.1 lcl|GPHN_38:8-2365_ORF1_GPHN_38:7:2364, XP_006515969.1 lcl|GPHN_3:8-2257_ORF1_GPHN_3:7:2256, XP_006515970.1 lcl|GPHN_1:8-2218_ORF1_GPHN_1:7:2217, XP_017170562.1, XP_017170563.1, XP_017170564.1, XP_017170565.1 lcl|GPHN_29:8-2323_ORF1_GPHN_…
DKGVQCEEEEEEKKDSGVA	DKGVQC(+57.02)EEEEEEKKDSGVA	C6:Carbamidomethylation:1000.00	52.45	2164.94	3.2	722.657	16.15	NP_666077.2 lcl|GPHN_4:8-2326_ORF1_GPHN_4:7:2325, XP_006515962.1, XP_006515963.1, XP_006515964.1, XP_006515965.1, XP_006515966.1, XP_006515967.1, XP_006515968.1 lcl|GPHN_38:8-2365_ORF1_GPHN_38:7:2364, XP_006515969.1 lcl|GPHN_3:8-2257_ORF1_GPHN_3:7:2256, XP_006515970.1 lcl|GPHN_1:8-2218_ORF1_GPHN_1:7:2217, XP_017170562.1, XP_017170563.1, XP_017170564.1, XP_017170565.1 lcl|GPHN_29:8-2323_ORF1_GPHN_…
DKGVQCEEEEEEKKDSGVAS	DKGVQC(+57.02)EEEEEEKKDSGVAS	C6:Carbamidomethylation:1000.00	33.35	2251.98	1.3	751.667	16.1	NP_666077.2 lcl|GPHN_4:8-2326_ORF1_GPHN_4:7:2325, XP_006515962.1, XP_006515963.1, XP_006515964.1, XP_006515965.1, XP_006515966.1, XP_006515967.1, XP_006515968.1 lcl|GPHN_38:8-2365_ORF1_GPHN_38:7:2364, XP_006515969.1 lcl|GPHN_3:8-2257_ORF1_GPHN_3:7:2256, XP_006515970.1 lcl|GPHN_1:8-2218_ORF1_GPHN_1:7:2217, XP_017170562.1, XP_017170563.1, XP_017170564.1, XP_017170565.1 lcl|GPHN_29:8-2323_ORF1_GPHN_…
DKRIPDSIIS	DKRIPDSIIS		22.31	1142.63	-1.1	572.321	22.04	NP_666077.2 lcl|GPHN_4:8-2326_ORF1_GPHN_4:7:2325, XP_006515962.1, XP_006515963.1, XP_006515964.1, XP_006515965.1, XP_006515968.1 lcl|GPHN_38:8-2365_ORF1_GPHN_38:7:2364, XP_017170562.1, XP_017170563.1, XP_017170564.1, lcl|GPHN_101:8-994_ORF2_GPHN_101:7:993, lcl|GPHN_105:73-2247_ORF1_GPHN_105:72:2246, lcl|GPHN_119:441-2183_ORF3_GPHN_119:440:2182, lcl|GPHN_121:8-2368_ORF1_GPHN_121:7:2367, lcl|GPHN_1…
DKRIPDSIISR	DKRIPDSIISR		34.67	1298.73	-0.7	433.917	19.29	NP_666077.2 lcl|GPHN_4:8-2326_ORF1_GPHN_4:7:2325, XP_006515962.1, XP_006515963.1, XP_006515964.1, XP_006515965.1, XP_006515968.1 lcl|GPHN_38:8-2365_ORF1_GPHN_38:7:2364, XP_017170562.1, XP_017170563.1, XP_017170564.1, lcl|GPHN_101:8-994_ORF2_GPHN_101:7:993, lcl|GPHN_105:73-2247_ORF1_GPHN_105:72:2246, lcl|GPHN_119:441-2183_ORF3_GPHN_119:440:2182, lcl|GPHN_121:8-2368_ORF1_GPHN_121:7:2367, lcl|GPHN_1…
DLLRDAI	D(+42.01)LLRDAI	D1:Acetylation (Protein N-term):1000.00	20.41	856.465	-1.2	429.239	30.37	NP_666077.2 lcl|GPHN_4:8-2326_ORF1_GPHN_4:7:2325, XP_006515962.1, XP_006515963.1, XP_006515964.1, XP_006515965.1, XP_006515966.1, XP_006515967.1, XP_006515968.1 lcl|GPHN_38:8-2365_ORF1_GPHN_38:7:2364, XP_006515969.1 lcl|GPHN_3:8-2257_ORF1_GPHN_3:7:2256, XP_006515970.1 lcl|GPHN_1:8-2218_ORF1_GPHN_1:7:2217, XP_017170562.1, XP_017170563.1, XP_017170564.1, XP_017170565.1 lcl|GPHN_29:8-2323_ORF1_GPHN_…
DLLRDAI	DLLRDAI		20.05	814.455	-2.6	408.234	27.76	NP_666077.2 lcl|GPHN_4:8-2326_ORF1_GPHN_4:7:2325, XP_006515962.1, XP_006515963.1, XP_006515964.1, XP_006515965.1, XP_006515966.1, XP_006515967.1, XP_006515968.1 lcl|GPHN_38:8-2365_ORF1_GPHN_38:7:2364, XP_006515969.1 lcl|GPHN_3:8-2257_ORF1_GPHN_3:7:2256, XP_006515970.1 lcl|GPHN_1:8-2218_ORF1_GPHN_1:7:2217, XP_017170562.1, XP_017170563.1, XP_017170564.1, XP_017170565.1 lcl|GPHN_29:8-2323_ORF1_GPHN_…
DLLRDAIV	D(+42.01)LLRDAIV	D1:Acetylation (Protein N-term):1000.00	31.88	955.534	-1	478.774	32.27	NP_666077.2 lcl|GPHN_4:8-2326_ORF1_GPHN_4:7:2325, XP_006515962.1, XP_006515963.1, XP_006515964.1, XP_006515965.1, XP_006515966.1, XP_006515967.1, XP_006515968.1 lcl|GPHN_38:8-2365_ORF1_GPHN_38:7:2364, XP_006515969.1 lcl|GPHN_3:8-2257_ORF1_GPHN_3:7:2256, XP_006515970.1 lcl|GPHN_1:8-2218_ORF1_GPHN_1:7:2217, XP_017170562.1, XP_017170563.1, XP_017170564.1, XP_017170565.1 lcl|GPHN_29:8-2323_ORF1_GPHN_…
DLLRDAIV	DLLRDAIV		23.82	913.523	0.3	457.769	29.56	NP_666077.2 lcl|GPHN_4:8-2326_ORF1_GPHN_4:7:2325, XP_006515962.1, XP_006515963.1, XP_006515964.1, XP_006515965.1, XP_006515966.1, XP_006515967.1, XP_006515968.1 lcl|GPHN_38:8-2365_ORF1_GPHN_38:7:2364, XP_006515969.1 lcl|GPHN_3:8-2257_ORF1_GPHN_3:7:2256, XP_006515970.1 lcl|GPHN_1:8-2218_ORF1_GPHN_1:7:2217, XP_017170562.1, XP_017170563.1, XP_017170564.1, XP_017170565.1 lcl|GPHN_29:8-2323_ORF1_GPHN_…
DLLRDAIVK	DLLRDAIVK		19.07	1041.62	-2.8	348.212	24.08	NP_666077.2 lcl|GPHN_4:8-2326_ORF1_GPHN_4:7:2325, XP_006515962.1, XP_006515963.1, XP_006515964.1, XP_006515965.1, XP_006515966.1, XP_006515967.1, XP_006515968.1 lcl|GPHN_38:8-2365_ORF1_GPHN_38:7:2364, XP_006515969.1 lcl|GPHN_3:8-2257_ORF1_GPHN_3:7:2256, XP_006515970.1 lcl|GPHN_1:8-2218_ORF1_GPHN_1:7:2217, XP_017170562.1, XP_017170563.1, XP_017170564.1, XP_017170565.1 lcl|GPHN_29:8-2323_ORF1_GPHN_…
DLLRDAIVKV	DLLRDAIVKV		28.44	1140.69	3.6	571.353	28.11	NP_666077.2 lcl|GPHN_4:8-2326_ORF1_GPHN_4:7:2325, XP_006515962.1, XP_006515963.1, XP_006515964.1, XP_006515965.1, XP_006515966.1, XP_006515967.1, XP_006515968.1 lcl|GPHN_38:8-2365_ORF1_GPHN_38:7:2364, XP_006515969.1 lcl|GPHN_3:8-2257_ORF1_GPHN_3:7:2256, XP_006515970.1 lcl|GPHN_1:8-2218_ORF1_GPHN_1:7:2217, XP_017170562.1, XP_017170563.1, XP_017170564.1, XP_017170565.1 lcl|GPHN_29:8-2323_ORF1_GPHN_…
DLLRDAIVKV	D(+42.01)LLRDAIVKV	D1:Acetylation (Protein N-term):1000.00	26.07	1182.7	-0.3	592.356	29	NP_666077.2 lcl|GPHN_4:8-2326_ORF1_GPHN_4:7:2325, XP_006515962.1, XP_006515963.1, XP_006515964.1, XP_006515965.1, XP_006515966.1, XP_006515967.1, XP_006515968.1 lcl|GPHN_38:8-2365_ORF1_GPHN_38:7:2364, XP_006515969.1 lcl|GPHN_3:8-2257_ORF1_GPHN_3:7:2256, XP_006515970.1 lcl|GPHN_1:8-2218_ORF1_GPHN_1:7:2217, XP_017170562.1, XP_017170563.1, XP_017170564.1, XP_017170565.1 lcl|GPHN_29:8-2323_ORF1_GPHN_…
DLLRDAIVKVK	DLLRDAIVKVK		34.34	1268.78	-1.4	423.934	24.12	NP_666077.2 lcl|GPHN_4:8-2326_ORF1_GPHN_4:7:2325, XP_006515962.1, XP_006515963.1, XP_006515964.1, XP_006515965.1, XP_006515966.1, XP_006515967.1, XP_006515968.1 lcl|GPHN_38:8-2365_ORF1_GPHN_38:7:2364, XP_006515969.1 lcl|GPHN_3:8-2257_ORF1_GPHN_3:7:2256, XP_006515970.1 lcl|GPHN_1:8-2218_ORF1_GPHN_1:7:2217, XP_017170562.1, XP_017170563.1, XP_017170564.1, XP_017170565.1 lcl|GPHN_29:8-2323_ORF1_GPHN_…
DLLRDAIVKVKEV	DLLRDAIVKVKEV		31.27	1496.89	3.1	499.973	28.19	NP_666077.2 lcl|GPHN_4:8-2326_ORF1_GPHN_4:7:2325, XP_006515962.1, XP_006515963.1, XP_006515964.1, XP_006515965.1, XP_006515966.1, XP_006515967.1, XP_006515968.1 lcl|GPHN_38:8-2365_ORF1_GPHN_38:7:2364, XP_006515969.1 lcl|GPHN_3:8-2257_ORF1_GPHN_3:7:2256, XP_006515970.1 lcl|GPHN_1:8-2218_ORF1_GPHN_1:7:2217, XP_017170562.1, XP_017170563.1, XP_017170564.1, XP_017170565.1 lcl|GPHN_29:8-2323_ORF1_GPHN_…
DLVQDPSL	DLVQDPSL		21.03	885.444	-0.4	443.729	29.73	NP_666077.2 lcl|GPHN_4:8-2326_ORF1_GPHN_4:7:2325, XP_006515962.1, XP_006515963.1, XP_006515964.1, XP_006515965.1, XP_006515966.1, XP_006515967.1, XP_006515968.1 lcl|GPHN_38:8-2365_ORF1_GPHN_38:7:2364, XP_006515969.1 lcl|GPHN_3:8-2257_ORF1_GPHN_3:7:2256, XP_006515970.1 lcl|GPHN_1:8-2218_ORF1_GPHN_1:7:2217, XP_017170562.1, XP_017170563.1, XP_017170564.1, XP_017170565.1 lcl|GPHN_29:8-2323_ORF1_GPHN_…
DLVQDPSLL	DLVQDPSLL		24.31	998.528	-0.5	500.271	34.42	NP_666077.2 lcl|GPHN_4:8-2326_ORF1_GPHN_4:7:2325, XP_006515962.1, XP_006515963.1, XP_006515964.1, XP_006515965.1, XP_006515966.1, XP_006515967.1, XP_006515968.1 lcl|GPHN_38:8-2365_ORF1_GPHN_38:7:2364, XP_006515969.1 lcl|GPHN_3:8-2257_ORF1_GPHN_3:7:2256, XP_006515970.1 lcl|GPHN_1:8-2218_ORF1_GPHN_1:7:2217, XP_017170562.1, XP_017170563.1, XP_017170564.1, XP_017170565.1 lcl|GPHN_29:8-2323_ORF1_GPHN_…
DLVQDPSLLG	DLVQDPSLLG		27.42	1055.55	-0.8	528.782	33.67	NP_666077.2 lcl|GPHN_4:8-2326_ORF1_GPHN_4:7:2325, XP_006515962.1, XP_006515963.1, XP_006515964.1, XP_006515965.1, XP_006515966.1, XP_006515967.1, XP_006515968.1 lcl|GPHN_38:8-2365_ORF1_GPHN_38:7:2364, XP_006515969.1 lcl|GPHN_3:8-2257_ORF1_GPHN_3:7:2256, XP_006515970.1 lcl|GPHN_1:8-2218_ORF1_GPHN_1:7:2217, XP_017170562.1, XP_017170563.1, XP_017170564.1, XP_017170565.1 lcl|GPHN_29:8-2323_ORF1_GPHN_…
DLVQDPSLLGGTIS	DLVQDPSLLGGTIS		31.85	1413.74	-1	707.874	35.63	NP_666077.2 lcl|GPHN_4:8-2326_ORF1_GPHN_4:7:2325, XP_006515962.1, XP_006515963.1, XP_006515964.1, XP_006515965.1, XP_006515966.1, XP_006515967.1, XP_006515968.1 lcl|GPHN_38:8-2365_ORF1_GPHN_38:7:2364, XP_006515969.1 lcl|GPHN_3:8-2257_ORF1_GPHN_3:7:2256, XP_006515970.1 lcl|GPHN_1:8-2218_ORF1_GPHN_1:7:2217, XP_017170562.1, XP_017170563.1, XP_017170564.1, XP_017170565.1 lcl|GPHN_29:8-2323_ORF1_GPHN_…
DLVQDPSLLGGTISAY	DLVQDPSLLGGTISAY		27.87	1647.84	0.9	824.926	37.9	NP_666077.2 lcl|GPHN_4:8-2326_ORF1_GPHN_4:7:2325, XP_006515962.1, XP_006515963.1, XP_006515964.1, XP_006515965.1, XP_006515966.1, XP_006515967.1, XP_006515968.1 lcl|GPHN_38:8-2365_ORF1_GPHN_38:7:2364, XP_006515969.1 lcl|GPHN_3:8-2257_ORF1_GPHN_3:7:2256, XP_006515970.1 lcl|GPHN_1:8-2218_ORF1_GPHN_1:7:2217, XP_017170562.1, XP_017170563.1, XP_017170564.1, XP_017170565.1 lcl|GPHN_29:8-2323_ORF1_GPHN_…
DLVQDPSLLGGTISAYK	D(+42.01)LVQDPSLLGGTISAYK	D1:Acetylation (Protein N-term):1000.00	50.78	1817.94	0.3	909.978	34.05	NP_666077.2 lcl|GPHN_4:8-2326_ORF1_GPHN_4:7:2325, XP_006515962.1, XP_006515963.1, XP_006515964.1, XP_006515965.1, XP_006515966.1, XP_006515967.1, XP_006515968.1 lcl|GPHN_38:8-2365_ORF1_GPHN_38:7:2364, XP_006515969.1 lcl|GPHN_3:8-2257_ORF1_GPHN_3:7:2256, XP_006515970.1 lcl|GPHN_1:8-2218_ORF1_GPHN_1:7:2217, XP_017170562.1, XP_017170563.1, XP_017170564.1, XP_017170565.1 lcl|GPHN_29:8-2323_ORF1_GPHN_…
DLVQDPSLLGGTISAYK	DLVQDPSLLGGTISAYK		46.91	1775.93	0.5	888.973	32.54	NP_666077.2 lcl|GPHN_4:8-2326_ORF1_GPHN_4:7:2325, XP_006515962.1, XP_006515963.1, XP_006515964.1, XP_006515965.1, XP_006515966.1, XP_006515967.1, XP_006515968.1 lcl|GPHN_38:8-2365_ORF1_GPHN_38:7:2364, XP_006515969.1 lcl|GPHN_3:8-2257_ORF1_GPHN_3:7:2256, XP_006515970.1 lcl|GPHN_1:8-2218_ORF1_GPHN_1:7:2217, XP_017170562.1, XP_017170563.1, XP_017170564.1, XP_017170565.1 lcl|GPHN_29:8-2323_ORF1_GPHN_…
DNLPPFP	DNLPPFP		20.69	798.391	1.1	799.399	32.84	NP_666077.2 lcl|GPHN_4:8-2326_ORF1_GPHN_4:7:2325, XP_006515962.1, XP_006515963.1, XP_006515964.1, XP_006515965.1, XP_006515966.1, XP_006515967.1, XP_006515968.1 lcl|GPHN_38:8-2365_ORF1_GPHN_38:7:2364, XP_006515969.1 lcl|GPHN_3:8-2257_ORF1_GPHN_3:7:2256, XP_006515970.1 lcl|GPHN_1:8-2218_ORF1_GPHN_1:7:2217, XP_017170562.1, XP_017170563.1, XP_017170564.1, XP_017170565.1 lcl|GPHN_29:8-2323_ORF1_GPHN_…
DNLPPFPA	DNLPPFPA		22.67	869.428	-0.5	435.721	31.74	NP_666077.2 lcl|GPHN_4:8-2326_ORF1_GPHN_4:7:2325, XP_006515962.1, XP_006515963.1, XP_006515964.1, XP_006515965.1, XP_006515966.1, XP_006515967.1, XP_006515968.1 lcl|GPHN_38:8-2365_ORF1_GPHN_38:7:2364, XP_006515969.1 lcl|GPHN_3:8-2257_ORF1_GPHN_3:7:2256, XP_006515970.1 lcl|GPHN_1:8-2218_ORF1_GPHN_1:7:2217, XP_017170562.1, XP_017170563.1, XP_017170564.1, XP_017170565.1 lcl|GPHN_29:8-2323_ORF1_GPHN_…
DNLPPFPAS	DNLPPFPAS		28.8	956.46	-1.5	479.237	30.47	NP_666077.2 lcl|GPHN_4:8-2326_ORF1_GPHN_4:7:2325, XP_006515962.1, XP_006515963.1, XP_006515964.1, XP_006515965.1, XP_006515966.1, XP_006515967.1, XP_006515968.1 lcl|GPHN_38:8-2365_ORF1_GPHN_38:7:2364, XP_006515969.1 lcl|GPHN_3:8-2257_ORF1_GPHN_3:7:2256, XP_006515970.1 lcl|GPHN_1:8-2218_ORF1_GPHN_1:7:2217, XP_017170562.1, XP_017170563.1, XP_017170564.1, XP_017170565.1 lcl|GPHN_29:8-2323_ORF1_GPHN_…
DNLPPFPASVK	DNLPPFPASVK		31.47	1183.62	3.1	592.821	26.55	NP_666077.2 lcl|GPHN_4:8-2326_ORF1_GPHN_4:7:2325, XP_006515962.1, XP_006515963.1, XP_006515964.1, XP_006515965.1, XP_006515966.1, XP_006515967.1, XP_006515968.1 lcl|GPHN_38:8-2365_ORF1_GPHN_38:7:2364, XP_006515969.1 lcl|GPHN_3:8-2257_ORF1_GPHN_3:7:2256, XP_006515970.1 lcl|GPHN_1:8-2218_ORF1_GPHN_1:7:2217, XP_017170562.1, XP_017170563.1, XP_017170564.1, XP_017170565.1 lcl|GPHN_29:8-2323_ORF1_GPHN_…
DNLPPFPASVKDGYAVR	DNLPPFPASVKDGYAVR		41.62	1844.94	0.5	615.988	26.16	NP_666077.2 lcl|GPHN_4:8-2326_ORF1_GPHN_4:7:2325, XP_006515962.1, XP_006515963.1, XP_006515964.1, XP_006515965.1, XP_006515966.1, XP_006515967.1, XP_006515968.1 lcl|GPHN_38:8-2365_ORF1_GPHN_38:7:2364, XP_006515969.1 lcl|GPHN_3:8-2257_ORF1_GPHN_3:7:2256, XP_006515970.1 lcl|GPHN_1:8-2218_ORF1_GPHN_1:7:2217, XP_017170562.1, XP_017170563.1, XP_017170564.1, XP_017170565.1 lcl|GPHN_29:8-2323_ORF1_GPHN_…
DNPDDLLN	DNPDDLLN		19.28	914.398	0.4	458.207	28.71	NP_666077.2 lcl|GPHN_4:8-2326_ORF1_GPHN_4:7:2325, XP_006515962.1, XP_006515963.1, XP_006515964.1, XP_006515965.1, XP_006515966.1, XP_006515967.1, XP_006515968.1 lcl|GPHN_38:8-2365_ORF1_GPHN_38:7:2364, XP_006515969.1 lcl|GPHN_3:8-2257_ORF1_GPHN_3:7:2256, XP_006515970.1 lcl|GPHN_1:8-2218_ORF1_GPHN_1:7:2217, XP_017170562.1, XP_017170563.1, XP_017170564.1, XP_017170565.1 lcl|GPHN_29:8-2323_ORF1_GPHN_…
DNPDDLLNAL	DNPDDLLNAL		26.17	1098.52	-0.9	550.266	37.53	NP_666077.2 lcl|GPHN_4:8-2326_ORF1_GPHN_4:7:2325, XP_006515962.1, XP_006515963.1, XP_006515964.1, XP_006515965.1, XP_006515966.1, XP_006515967.1, XP_006515968.1 lcl|GPHN_38:8-2365_ORF1_GPHN_38:7:2364, XP_006515969.1 lcl|GPHN_3:8-2257_ORF1_GPHN_3:7:2256, XP_006515970.1 lcl|GPHN_1:8-2218_ORF1_GPHN_1:7:2217, XP_017170562.1, XP_017170563.1, XP_017170564.1, XP_017170565.1 lcl|GPHN_29:8-2323_ORF1_GPHN_…
DNPDDLLNALN	DNPDDLLNALN		27.61	1212.56	0.1	607.288	35.47	NP_666077.2 lcl|GPHN_4:8-2326_ORF1_GPHN_4:7:2325, XP_006515962.1, XP_006515963.1, XP_006515964.1, XP_006515965.1, XP_006515966.1, XP_006515967.1, XP_006515968.1 lcl|GPHN_38:8-2365_ORF1_GPHN_38:7:2364, XP_006515969.1 lcl|GPHN_3:8-2257_ORF1_GPHN_3:7:2256, XP_006515970.1 lcl|GPHN_1:8-2218_ORF1_GPHN_1:7:2217, XP_017170562.1, XP_017170563.1, XP_017170564.1, XP_017170565.1 lcl|GPHN_29:8-2323_ORF1_GPHN_…
DPRPEYH	DPRPEYH		20.5	912.409	0.8	457.212	16.54	NP_666077.2 lcl|GPHN_4:8-2326_ORF1_GPHN_4:7:2325, XP_006515962.1, XP_006515963.1, XP_006515964.1, XP_006515965.1, XP_006515966.1, XP_006515967.1, XP_006515968.1 lcl|GPHN_38:8-2365_ORF1_GPHN_38:7:2364, XP_006515969.1 lcl|GPHN_3:8-2257_ORF1_GPHN_3:7:2256, XP_006515970.1 lcl|GPHN_1:8-2218_ORF1_GPHN_1:7:2217, XP_017170562.1, XP_017170563.1, XP_017170564.1, XP_017170565.1 lcl|GPHN_29:8-2323_ORF1_GPHN_…
DPRPEYHR	DPRPEYHR		31.53	1068.51	-0.9	357.177	15.16	NP_666077.2 lcl|GPHN_4:8-2326_ORF1_GPHN_4:7:2325, XP_006515962.1, XP_006515963.1, XP_006515964.1, XP_006515965.1, XP_006515966.1, XP_006515967.1, XP_006515968.1 lcl|GPHN_38:8-2365_ORF1_GPHN_38:7:2364, XP_006515969.1 lcl|GPHN_3:8-2257_ORF1_GPHN_3:7:2256, XP_006515970.1 lcl|GPHN_1:8-2218_ORF1_GPHN_1:7:2217, XP_017170562.1, XP_017170563.1, XP_017170564.1, XP_017170565.1 lcl|GPHN_29:8-2323_ORF1_GPHN_…
DPRPEYHRC	DPRPEYHRC(+57.02)	C9:Carbamidomethylation:1000.00	21.13	1228.54	2.4	410.522	15.33	NP_666077.2 lcl|GPHN_4:8-2326_ORF1_GPHN_4:7:2325, XP_006515962.1, XP_006515963.1, XP_006515964.1, XP_006515965.1, XP_006515966.1, XP_006515967.1, XP_006515968.1 lcl|GPHN_38:8-2365_ORF1_GPHN_38:7:2364, XP_006515969.1 lcl|GPHN_3:8-2257_ORF1_GPHN_3:7:2256, XP_006515970.1 lcl|GPHN_1:8-2218_ORF1_GPHN_1:7:2217, XP_017170562.1, XP_017170563.1, XP_017170564.1, XP_017170565.1 lcl|GPHN_29:8-2323_ORF1_GPHN_…
DRFIIGE	DRFIIGE		22.52	848.439	-0.6	425.227	25.6	NP_666077.2 lcl|GPHN_4:8-2326_ORF1_GPHN_4:7:2325, XP_006515962.1, XP_006515963.1, XP_006515964.1, XP_006515965.1, XP_006515966.1, XP_006515967.1, XP_006515968.1 lcl|GPHN_38:8-2365_ORF1_GPHN_38:7:2364, XP_006515969.1 lcl|GPHN_3:8-2257_ORF1_GPHN_3:7:2256, XP_006515970.1 lcl|GPHN_1:8-2218_ORF1_GPHN_1:7:2217, XP_017170562.1, XP_017170563.1, XP_017170564.1, XP_017170565.1 lcl|GPHN_29:8-2323_ORF1_GPHN_…
DRFIIGESQ	DRFIIGESQ		28.51	1063.53	0.8	532.773	24.58	NP_666077.2 lcl|GPHN_4:8-2326_ORF1_GPHN_4:7:2325, XP_006515962.1, XP_006515963.1, XP_006515964.1, XP_006515965.1, XP_006515966.1, XP_006515967.1, XP_006515968.1 lcl|GPHN_38:8-2365_ORF1_GPHN_38:7:2364, XP_006515969.1 lcl|GPHN_3:8-2257_ORF1_GPHN_3:7:2256, XP_006515970.1 lcl|GPHN_1:8-2218_ORF1_GPHN_1:7:2217, XP_017170562.1, XP_017170563.1, XP_017170564.1, XP_017170565.1 lcl|GPHN_29:8-2323_ORF1_GPHN_…
DRFIIGESQA	DRFIIGESQA		22.09	1134.57	-0.9	568.29	24.65	NP_666077.2 lcl|GPHN_4:8-2326_ORF1_GPHN_4:7:2325, XP_006515962.1, XP_006515963.1, XP_006515964.1, XP_006515965.1, XP_006515966.1, XP_006515967.1, XP_006515968.1 lcl|GPHN_38:8-2365_ORF1_GPHN_38:7:2364, XP_006515969.1 lcl|GPHN_3:8-2257_ORF1_GPHN_3:7:2256, XP_006515970.1 lcl|GPHN_1:8-2218_ORF1_GPHN_1:7:2217, XP_017170562.1, XP_017170563.1, XP_017170564.1, XP_017170565.1 lcl|GPHN_29:8-2323_ORF1_GPHN_…
DRFIIGESQAGEQPT	DRFIIGESQAGEQPT		30.33	1646.79	-3.1	824.4	24.85	NP_666077.2 lcl|GPHN_4:8-2326_ORF1_GPHN_4:7:2325, XP_006515962.1, XP_006515963.1, XP_006515964.1, XP_006515965.1, XP_006515966.1, XP_006515967.1, XP_006515968.1 lcl|GPHN_38:8-2365_ORF1_GPHN_38:7:2364, XP_006515969.1 lcl|GPHN_3:8-2257_ORF1_GPHN_3:7:2256, XP_006515970.1 lcl|GPHN_1:8-2218_ORF1_GPHN_1:7:2217, XP_017170562.1, XP_017170563.1, XP_017170564.1, XP_017170565.1 lcl|GPHN_29:8-2323_ORF1_GPHN_…
DSCFRNL	DSC(+57.02)FRNL	C3:Carbamidomethylation:1000.00	26.76	910.397	-1.2	456.205	22.18	NP_666077.2 lcl|GPHN_4:8-2326_ORF1_GPHN_4:7:2325, XP_006515962.1, XP_006515963.1, XP_006515964.1, XP_006515965.1, XP_006515966.1, XP_006515967.1, XP_006515968.1 lcl|GPHN_38:8-2365_ORF1_GPHN_38:7:2364, XP_006515969.1 lcl|GPHN_3:8-2257_ORF1_GPHN_3:7:2256, XP_006515970.1 lcl|GPHN_1:8-2218_ORF1_GPHN_1:7:2217, XP_017170562.1, XP_017170563.1, XP_017170564.1, XP_017170565.1 lcl|GPHN_29:8-2323_ORF1_GPHN_…
DSCFRNLAEDRSGI	DSC(+57.02)FRNLAEDRSGI	C3:Carbamidomethylation:1000.00	40.25	1638.74	-2	547.254	23.55	NP_666077.2 lcl|GPHN_4:8-2326_ORF1_GPHN_4:7:2325, XP_006515962.1, XP_006515963.1, XP_006515964.1, XP_006515965.1, XP_006515966.1, XP_006515967.1, XP_006515968.1 lcl|GPHN_38:8-2365_ORF1_GPHN_38:7:2364, XP_006515969.1 lcl|GPHN_3:8-2257_ORF1_GPHN_3:7:2256, XP_006515970.1 lcl|GPHN_1:8-2218_ORF1_GPHN_1:7:2217, XP_017170562.1, XP_017170563.1, XP_017170564.1, XP_017170565.1 lcl|GPHN_29:8-2323_ORF1_GPHN_…
DSGVASTEDSSSSHIT	DSGVASTEDSSSSHIT		29.24	1578.66	-1	790.339	18.31	NP_666077.2 lcl|GPHN_4:8-2326_ORF1_GPHN_4:7:2325, XP_006515962.1, XP_006515963.1, XP_006515964.1, XP_006515965.1, XP_006515966.1, XP_006515967.1, XP_006515968.1 lcl|GPHN_38:8-2365_ORF1_GPHN_38:7:2364, XP_006515969.1 lcl|GPHN_3:8-2257_ORF1_GPHN_3:7:2256, XP_006515970.1 lcl|GPHN_1:8-2218_ORF1_GPHN_1:7:2217, XP_017170562.1, XP_017170563.1, XP_017170564.1, XP_017170565.1 lcl|GPHN_29:8-2323_ORF1_GPHN_…
DSGVASTEDSSSSHITAA	DSGVASTEDSSSSHITAA		27.51	1720.74	-0.7	861.376	19.6	NP_666077.2 lcl|GPHN_4:8-2326_ORF1_GPHN_4:7:2325, XP_006515962.1, XP_006515963.1, XP_006515964.1, XP_006515965.1, XP_006515966.1, XP_006515967.1, XP_006515968.1 lcl|GPHN_38:8-2365_ORF1_GPHN_38:7:2364, XP_006515969.1 lcl|GPHN_3:8-2257_ORF1_GPHN_3:7:2256, XP_006515970.1 lcl|GPHN_1:8-2218_ORF1_GPHN_1:7:2217, XP_017170562.1, XP_017170563.1, XP_017170564.1, XP_017170565.1 lcl|GPHN_29:8-2323_ORF1_GPHN_…
DSGVASTEDSSSSHITAAALAAK	DSGVASTEDSSSSHITAAALAAK		56.33	2175.03	0.4	1088.52	22.38	NP_666077.2 lcl|GPHN_4:8-2326_ORF1_GPHN_4:7:2325, XP_006515962.1, XP_006515963.1, XP_006515964.1, XP_006515965.1, XP_006515966.1, XP_006515967.1, XP_006515968.1 lcl|GPHN_38:8-2365_ORF1_GPHN_38:7:2364, XP_006515969.1 lcl|GPHN_3:8-2257_ORF1_GPHN_3:7:2256, XP_006515970.1 lcl|GPHN_1:8-2218_ORF1_GPHN_1:7:2217, XP_017170562.1, XP_017170563.1, XP_017170564.1, XP_017170565.1 lcl|GPHN_29:8-2323_ORF1_GPHN_…
DSNRSTLL	DSNRSTLL		30.43	904.461	-0.3	453.238	21.04	NP_666077.2 lcl|GPHN_4:8-2326_ORF1_GPHN_4:7:2325, XP_006515962.1, XP_006515963.1, XP_006515964.1, XP_006515965.1, XP_006515966.1, XP_006515967.1, XP_006515968.1 lcl|GPHN_38:8-2365_ORF1_GPHN_38:7:2364, XP_006515969.1 lcl|GPHN_3:8-2257_ORF1_GPHN_3:7:2256, XP_006515970.1 lcl|GPHN_1:8-2218_ORF1_GPHN_1:7:2217, XP_017170562.1, XP_017170563.1, XP_017170564.1, XP_017170565.1 lcl|GPHN_29:8-2323_ORF1_GPHN_…
DSNRSTLLA	DSNRSTLLA		20.48	975.499	-0.2	488.756	20.71	NP_666077.2 lcl|GPHN_4:8-2326_ORF1_GPHN_4:7:2325, XP_006515962.1, XP_006515963.1, XP_006515964.1, XP_006515965.1, XP_006515966.1, XP_006515967.1, XP_006515968.1 lcl|GPHN_38:8-2365_ORF1_GPHN_38:7:2364, XP_006515969.1 lcl|GPHN_3:8-2257_ORF1_GPHN_3:7:2256, XP_006515970.1 lcl|GPHN_1:8-2218_ORF1_GPHN_1:7:2217, XP_017170562.1, XP_017170563.1, XP_017170564.1, XP_017170565.1 lcl|GPHN_29:8-2323_ORF1_GPHN_…
DTASLSTTPSESPR	DTASLS(+79.97)TTPSESPR	S6:Phosphorylation (STY):0.00	43.77	1527.65	1.3	764.831	21.66	NP_666077.2 lcl|GPHN_4:8-2326_ORF1_GPHN_4:7:2325, XP_006515962.1, XP_006515963.1, XP_006515964.1, XP_006515965.1, XP_006515966.1, XP_006515967.1, XP_006515968.1 lcl|GPHN_38:8-2365_ORF1_GPHN_38:7:2364, XP_006515969.1 lcl|GPHN_3:8-2257_ORF1_GPHN_3:7:2256, XP_006515970.1 lcl|GPHN_1:8-2218_ORF1_GPHN_1:7:2217, XP_017170562.1, XP_017170563.1, XP_017170564.1, XP_017170565.1 lcl|GPHN_29:8-2323_ORF1_GPHN_…
DTASLSTTPSESPR	DTASLSTTPSES(+79.97)PR	S12:Phosphorylation (STY):0.00	41.62	1527.65	1.7	764.831	22.5	NP_666077.2 lcl|GPHN_4:8-2326_ORF1_GPHN_4:7:2325, XP_006515962.1, XP_006515963.1, XP_006515964.1, XP_006515965.1, XP_006515966.1, XP_006515967.1, XP_006515968.1 lcl|GPHN_38:8-2365_ORF1_GPHN_38:7:2364, XP_006515969.1 lcl|GPHN_3:8-2257_ORF1_GPHN_3:7:2256, XP_006515970.1 lcl|GPHN_1:8-2218_ORF1_GPHN_1:7:2217, XP_017170562.1, XP_017170563.1, XP_017170564.1, XP_017170565.1 lcl|GPHN_29:8-2323_ORF1_GPHN_…
DTASLSTTPSESPR	DTASLSTTPSESPR		41.33	1447.68	0	724.847	21.36	NP_666077.2 lcl|GPHN_4:8-2326_ORF1_GPHN_4:7:2325, XP_006515962.1, XP_006515963.1, XP_006515964.1, XP_006515965.1, XP_006515966.1, XP_006515967.1, XP_006515968.1 lcl|GPHN_38:8-2365_ORF1_GPHN_38:7:2364, XP_006515969.1 lcl|GPHN_3:8-2257_ORF1_GPHN_3:7:2256, XP_006515970.1 lcl|GPHN_1:8-2218_ORF1_GPHN_1:7:2217, XP_017170562.1, XP_017170563.1, XP_017170564.1, XP_017170565.1 lcl|GPHN_29:8-2323_ORF1_GPHN_…
DTASLSTTPSESPR	DT(+79.97)ASLSTT(+79.97)PSESPR	T2:Phosphorylation (STY):0.00;T8:Phosphorylation (STY):0.00	41.32	1607.61	1	804.814	24.15	NP_666077.2 lcl|GPHN_4:8-2326_ORF1_GPHN_4:7:2325, XP_006515962.1, XP_006515963.1, XP_006515964.1, XP_006515965.1, XP_006515966.1, XP_006515967.1, XP_006515968.1 lcl|GPHN_38:8-2365_ORF1_GPHN_38:7:2364, XP_006515969.1 lcl|GPHN_3:8-2257_ORF1_GPHN_3:7:2256, XP_006515970.1 lcl|GPHN_1:8-2218_ORF1_GPHN_1:7:2217, XP_017170562.1, XP_017170563.1, XP_017170564.1, XP_017170565.1 lcl|GPHN_29:8-2323_ORF1_GPHN_…
DTASLSTTPSESPR	DTASLSTT(+79.97)PSESPR	T8:Phosphorylation (STY):0.00	38.51	1527.65	-0.1	764.83	21.35	NP_666077.2 lcl|GPHN_4:8-2326_ORF1_GPHN_4:7:2325, XP_006515962.1, XP_006515963.1, XP_006515964.1, XP_006515965.1, XP_006515966.1, XP_006515967.1, XP_006515968.1 lcl|GPHN_38:8-2365_ORF1_GPHN_38:7:2364, XP_006515969.1 lcl|GPHN_3:8-2257_ORF1_GPHN_3:7:2256, XP_006515970.1 lcl|GPHN_1:8-2218_ORF1_GPHN_1:7:2217, XP_017170562.1, XP_017170563.1, XP_017170564.1, XP_017170565.1 lcl|GPHN_29:8-2323_ORF1_GPHN_…
DTASLSTTPSESPR	DTASLSTT(+79.97)PSES(+79.97)PR	T8:Phosphorylation (STY):0.00;S12:Phosphorylation (STY):9.40	29.34	1607.61	-0.1	804.813	24.94	NP_666077.2 lcl|GPHN_4:8-2326_ORF1_GPHN_4:7:2325, XP_006515962.1, XP_006515963.1, XP_006515964.1, XP_006515965.1, XP_006515966.1, XP_006515967.1, XP_006515968.1 lcl|GPHN_38:8-2365_ORF1_GPHN_38:7:2364, XP_006515969.1 lcl|GPHN_3:8-2257_ORF1_GPHN_3:7:2256, XP_006515970.1 lcl|GPHN_1:8-2218_ORF1_GPHN_1:7:2217, XP_017170562.1, XP_017170563.1, XP_017170564.1, XP_017170565.1 lcl|GPHN_29:8-2323_ORF1_GPHN_…
DTASLSTTPSESPRAQ	DT(+79.97)ASLSTTPSES(+79.97)PRAQ	T2:Phosphorylation (STY):0.00;S12:Phosphorylation (STY):0.00	22.24	1806.71	-1.2	904.36	24.94	NP_666077.2 lcl|GPHN_4:8-2326_ORF1_GPHN_4:7:2325, XP_006515962.1, XP_006515963.1, XP_006515964.1, XP_006515965.1, XP_006515966.1, XP_006515967.1, XP_006515968.1 lcl|GPHN_38:8-2365_ORF1_GPHN_38:7:2364, XP_006515969.1 lcl|GPHN_3:8-2257_ORF1_GPHN_3:7:2256, XP_006515970.1 lcl|GPHN_1:8-2218_ORF1_GPHN_1:7:2217, XP_017170562.1, XP_017170563.1, XP_017170564.1, XP_017170565.1 lcl|GPHN_29:8-2323_ORF1_GPHN_…
DTASLSTTPSESPRAQAT	DTASLSTTPSESPRAQAT		37.12	1818.86	0.4	910.437	20.01	NP_666077.2 lcl|GPHN_4:8-2326_ORF1_GPHN_4:7:2325, XP_006515962.1, XP_006515963.1, XP_006515964.1, XP_006515965.1, XP_006515966.1, XP_006515967.1, XP_006515968.1 lcl|GPHN_38:8-2365_ORF1_GPHN_38:7:2364, XP_006515969.1 lcl|GPHN_3:8-2257_ORF1_GPHN_3:7:2256, XP_006515970.1 lcl|GPHN_1:8-2218_ORF1_GPHN_1:7:2217, XP_017170562.1, XP_017170563.1, XP_017170564.1, XP_017170565.1 lcl|GPHN_29:8-2323_ORF1_GPHN_…
DTASLSTTPSESPRAQATSR	DTASLSTTPSES(+79.97)PRAQATSR	S12:Phosphorylation (STY):7.69	46.44	2141.96	0.3	714.994	19.68	NP_666077.2 lcl|GPHN_4:8-2326_ORF1_GPHN_4:7:2325, XP_006515962.1, XP_006515963.1, XP_006515964.1, XP_006515965.1, XP_006515966.1, XP_006515967.1, XP_006515968.1 lcl|GPHN_38:8-2365_ORF1_GPHN_38:7:2364, XP_006515969.1 lcl|GPHN_3:8-2257_ORF1_GPHN_3:7:2256, XP_006515970.1 lcl|GPHN_1:8-2218_ORF1_GPHN_1:7:2217, XP_017170562.1, XP_017170563.1, XP_017170564.1, XP_017170565.1 lcl|GPHN_29:8-2323_ORF1_GPHN_…
DTASLSTTPSESPRAQATSR	DTAS(+79.97)LSTTPSESPRAQATSR	S4:Phosphorylation (STY):0.00	45.47	2141.96	-1.7	1071.98	19.75	NP_666077.2 lcl|GPHN_4:8-2326_ORF1_GPHN_4:7:2325, XP_006515962.1, XP_006515963.1, XP_006515964.1, XP_006515965.1, XP_006515966.1, XP_006515967.1, XP_006515968.1 lcl|GPHN_38:8-2365_ORF1_GPHN_38:7:2364, XP_006515969.1 lcl|GPHN_3:8-2257_ORF1_GPHN_3:7:2256, XP_006515970.1 lcl|GPHN_1:8-2218_ORF1_GPHN_1:7:2217, XP_017170562.1, XP_017170563.1, XP_017170564.1, XP_017170565.1 lcl|GPHN_29:8-2323_ORF1_GPHN_…
DTASLSTTPSESPRAQATSR	DTASLSTT(+79.97)PSES(+79.97)PRAQATSR	T8:Phosphorylation (STY):0.00;S12:Phosphorylation (STY):3.61	38.78	2221.93	0.7	741.649	21.54	NP_666077.2 lcl|GPHN_4:8-2326_ORF1_GPHN_4:7:2325, XP_006515962.1, XP_006515963.1, XP_006515964.1, XP_006515965.1, XP_006515966.1, XP_006515967.1, XP_006515968.1 lcl|GPHN_38:8-2365_ORF1_GPHN_38:7:2364, XP_006515969.1 lcl|GPHN_3:8-2257_ORF1_GPHN_3:7:2256, XP_006515970.1 lcl|GPHN_1:8-2218_ORF1_GPHN_1:7:2217, XP_017170562.1, XP_017170563.1, XP_017170564.1, XP_017170565.1 lcl|GPHN_29:8-2323_ORF1_GPHN_…
DTASLSTTPSESPRAQATSR	DTAS(+79.97)LSTTPSES(+79.97)PRAQATSR	S4:Phosphorylation (STY):0.00;S12:Phosphorylation (STY):0.00	33.22	2221.93	-0.3	741.649	21.49	NP_666077.2 lcl|GPHN_4:8-2326_ORF1_GPHN_4:7:2325, XP_006515962.1, XP_006515963.1, XP_006515964.1, XP_006515965.1, XP_006515966.1, XP_006515967.1, XP_006515968.1 lcl|GPHN_38:8-2365_ORF1_GPHN_38:7:2364, XP_006515969.1 lcl|GPHN_3:8-2257_ORF1_GPHN_3:7:2256, XP_006515970.1 lcl|GPHN_1:8-2218_ORF1_GPHN_1:7:2217, XP_017170562.1, XP_017170563.1, XP_017170564.1, XP_017170565.1 lcl|GPHN_29:8-2323_ORF1_GPHN_…
DTELIRESDDGTEELEVR	DTELIRESDDGTEELEVR		52.76	2104.98	0.9	702.667	25.04	NP_666077.2 lcl|GPHN_4:8-2326_ORF1_GPHN_4:7:2325, XP_006515962.1, XP_006515963.1, XP_006515964.1, XP_006515965.1, XP_006515966.1, XP_006515967.1, XP_006515968.1 lcl|GPHN_38:8-2365_ORF1_GPHN_38:7:2364, XP_006515969.1 lcl|GPHN_3:8-2257_ORF1_GPHN_3:7:2256, XP_006515970.1 lcl|GPHN_1:8-2218_ORF1_GPHN_1:7:2217, XP_017170562.1, XP_017170563.1, XP_017170564.1, XP_017170565.1 lcl|GPHN_29:8-2323_ORF1_GPHN_…
DVKLDPRPEYHR	DVKLDPRPEYHR		40.27	1523.78	-0.9	381.953	17.17	NP_666077.2 lcl|GPHN_4:8-2326_ORF1_GPHN_4:7:2325, XP_006515962.1, XP_006515963.1, XP_006515964.1, XP_006515965.1, XP_006515966.1, XP_006515967.1, XP_006515968.1 lcl|GPHN_38:8-2365_ORF1_GPHN_38:7:2364, XP_006515969.1 lcl|GPHN_3:8-2257_ORF1_GPHN_3:7:2256, XP_006515970.1 lcl|GPHN_1:8-2218_ORF1_GPHN_1:7:2217, XP_017170562.1, XP_017170563.1, XP_017170564.1, XP_017170565.1 lcl|GPHN_29:8-2323_ORF1_GPHN_…
DVMVIGR	DVMVIGR		24.29	788.421	-5.8	395.216	22.78	NP_666077.2 lcl|GPHN_4:8-2326_ORF1_GPHN_4:7:2325, XP_006515962.1, XP_006515963.1, XP_006515964.1, XP_006515965.1, XP_006515966.1, XP_006515967.1, XP_006515968.1 lcl|GPHN_38:8-2365_ORF1_GPHN_38:7:2364, XP_006515969.1 lcl|GPHN_3:8-2257_ORF1_GPHN_3:7:2256, XP_006515970.1 lcl|GPHN_1:8-2218_ORF1_GPHN_1:7:2217, XP_017170562.1, XP_017170563.1, XP_017170564.1, XP_017170565.1 lcl|GPHN_29:8-2323_ORF1_GPHN_…
DVMVIGRL	DVMVIGRL		18.4	901.505	-1.4	451.759	28.85	NP_666077.2 lcl|GPHN_4:8-2326_ORF1_GPHN_4:7:2325, XP_006515962.1, XP_006515963.1, XP_006515964.1, XP_006515965.1, XP_006515966.1, XP_006515967.1, XP_006515968.1 lcl|GPHN_38:8-2365_ORF1_GPHN_38:7:2364, XP_006515969.1 lcl|GPHN_3:8-2257_ORF1_GPHN_3:7:2256, XP_006515970.1 lcl|GPHN_1:8-2218_ORF1_GPHN_1:7:2217, XP_017170562.1, XP_017170563.1, XP_017170564.1, XP_017170565.1 lcl|GPHN_29:8-2323_ORF1_GPHN_…
DVTPEATK	DVTPEATK		30.3	859.429	-0.3	430.721	14.78	NP_666077.2 lcl|GPHN_4:8-2326_ORF1_GPHN_4:7:2325, XP_006515962.1, XP_006515967.1, XP_006515970.1 lcl|GPHN_1:8-2218_ORF1_GPHN_1:7:2217, XP_017170564.1, XP_017170565.1 lcl|GPHN_29:8-2323_ORF1_GPHN_29:7:2322, XP_017170567.1, XP_030102591.1 lcl|GPHN_8:8-2281_ORF1_GPHN_8:7:2280, XP_030102593.1 lcl|GPHN_2:8-1945_ORF1_GPHN_2:7:1944, lcl|GPHN_101:8-994_ORF2_GPHN_101:7:993, lcl|GPHN_102:8-943_ORF2_GPHN_10…
DVTPEATKEVIE	DVTPEATKEVIE		37.92	1329.67	1.1	665.841	23.03	NP_666077.2 lcl|GPHN_4:8-2326_ORF1_GPHN_4:7:2325, XP_006515962.1, XP_006515967.1, XP_006515970.1 lcl|GPHN_1:8-2218_ORF1_GPHN_1:7:2217, XP_017170564.1, XP_017170565.1 lcl|GPHN_29:8-2323_ORF1_GPHN_29:7:2322, XP_017170567.1, XP_030102591.1 lcl|GPHN_8:8-2281_ORF1_GPHN_8:7:2280, XP_030102593.1 lcl|GPHN_2:8-1945_ORF1_GPHN_2:7:1944, lcl|GPHN_101:8-994_ORF2_GPHN_101:7:993, lcl|GPHN_102:8-943_ORF2_GPHN_10…
DVTPEATKEVIER	DVTPEATKEVIER		39.18	1485.77	1.4	496.264	20.64	NP_666077.2 lcl|GPHN_4:8-2326_ORF1_GPHN_4:7:2325, XP_006515962.1, XP_006515967.1, XP_006515970.1 lcl|GPHN_1:8-2218_ORF1_GPHN_1:7:2217, XP_017170564.1, XP_017170565.1 lcl|GPHN_29:8-2323_ORF1_GPHN_29:7:2322, XP_017170567.1, XP_030102591.1 lcl|GPHN_8:8-2281_ORF1_GPHN_8:7:2280, XP_030102593.1 lcl|GPHN_2:8-1945_ORF1_GPHN_2:7:1944, lcl|GPHN_101:8-994_ORF2_GPHN_101:7:993, lcl|GPHN_102:8-943_ORF2_GPHN_10…
DVTPEATKEVIEREAPG	DVTPEATKEVIEREAPG		40.95	1839.92	2.2	920.97	23.69	NP_666077.2 lcl|GPHN_4:8-2326_ORF1_GPHN_4:7:2325, XP_006515962.1, XP_006515967.1, XP_006515970.1 lcl|GPHN_1:8-2218_ORF1_GPHN_1:7:2217, XP_017170564.1, XP_017170565.1 lcl|GPHN_29:8-2323_ORF1_GPHN_29:7:2322, XP_017170567.1, XP_030102591.1 lcl|GPHN_8:8-2281_ORF1_GPHN_8:7:2280, XP_030102593.1 lcl|GPHN_2:8-1945_ORF1_GPHN_2:7:1944, lcl|GPHN_101:8-994_ORF2_GPHN_101:7:993, lcl|GPHN_102:8-943_ORF2_GPHN_10…
DVTPEATKEVIEREAPGMA	DVTPEATKEVIEREAPGM(+15.99)A	M18:Oxidation (M):1000.00	31.56	2057.99	0	687.005	24	NP_666077.2 lcl|GPHN_4:8-2326_ORF1_GPHN_4:7:2325, XP_006515962.1, XP_006515967.1, XP_006515970.1 lcl|GPHN_1:8-2218_ORF1_GPHN_1:7:2217, XP_017170564.1, XP_017170565.1 lcl|GPHN_29:8-2323_ORF1_GPHN_29:7:2322, XP_017170567.1, XP_030102591.1 lcl|GPHN_8:8-2281_ORF1_GPHN_8:7:2280, XP_030102593.1 lcl|GPHN_2:8-1945_ORF1_GPHN_2:7:1944, lcl|GPHN_101:8-994_ORF2_GPHN_101:7:993, lcl|GPHN_102:8-943_ORF2_GPHN_10…
DVTPEKFPT	DVTPEKFPT		30.47	1032.51	0.8	517.264	22.84	XP_006515963.1, XP_006515964.1, XP_006515965.1, XP_006515966.1, XP_006515968.1 lcl|GPHN_38:8-2365_ORF1_GPHN_38:7:2364, XP_006515969.1 lcl|GPHN_3:8-2257_ORF1_GPHN_3:7:2256, XP_017170562.1, XP_017170563.1, XP_017170566.1, XP_017170568.1, XP_030102590.1 lcl|GPHN_41:8-2320_ORF1_GPHN_41:7:2319, XP_030102592.1, lcl|GPHN_100:8-925_ORF2_GPHN_100:7:924 lcl|GPHN_220:8-925_ORF2_GPHN_220:7:924, lcl|GPHN_107:…
DVTPEKFPTFPFCGLQK	DVTPEKFPTFPFC(+57.02)GLQK	C13:Carbamidomethylation:1000.00	42.42	2009.99	0.5	671.005	30.71	XP_006515963.1, XP_006515964.1, XP_006515965.1, XP_006515966.1, XP_006515968.1 lcl|GPHN_38:8-2365_ORF1_GPHN_38:7:2364, XP_006515969.1 lcl|GPHN_3:8-2257_ORF1_GPHN_3:7:2256, XP_017170562.1, XP_017170563.1, XP_017170566.1, XP_017170568.1, XP_030102590.1 lcl|GPHN_41:8-2320_ORF1_GPHN_41:7:2319, XP_030102592.1, lcl|GPHN_100:8-925_ORF2_GPHN_100:7:924 lcl|GPHN_220:8-925_ORF2_GPHN_220:7:924, lcl|GPHN_107:…
DVTPEKFPTFPFCGLQKG	DVTPEKFPTFPFC(+57.02)GLQKG	C13:Carbamidomethylation:1000.00	33.09	2067.01	0.1	690.012	30.61	XP_006515963.1, XP_006515964.1, XP_006515965.1, XP_006515966.1, XP_006515968.1 lcl|GPHN_38:8-2365_ORF1_GPHN_38:7:2364, XP_006515969.1 lcl|GPHN_3:8-2257_ORF1_GPHN_3:7:2256, XP_017170562.1, XP_017170563.1, XP_017170566.1, XP_017170568.1, XP_030102590.1 lcl|GPHN_41:8-2320_ORF1_GPHN_41:7:2319, XP_030102592.1, lcl|GPHN_100:8-925_ORF2_GPHN_100:7:924 lcl|GPHN_220:8-925_ORF2_GPHN_220:7:924, lcl|GPHN_107:…
DVYAKDNLPPFPA	DVYAKDNLPPFPA		38.92	1445.72	1.3	723.868	29.24	NP_666077.2 lcl|GPHN_4:8-2326_ORF1_GPHN_4:7:2325, XP_006515962.1, XP_006515963.1, XP_006515964.1, XP_006515965.1, XP_006515966.1, XP_006515967.1, XP_006515968.1 lcl|GPHN_38:8-2365_ORF1_GPHN_38:7:2364, XP_006515969.1 lcl|GPHN_3:8-2257_ORF1_GPHN_3:7:2256, XP_006515970.1 lcl|GPHN_1:8-2218_ORF1_GPHN_1:7:2217, XP_017170562.1, XP_017170563.1, XP_017170564.1, XP_017170565.1 lcl|GPHN_29:8-2323_ORF1_GPHN_…
DWCDEKEL	DWC(+57.02)DEKEL	C3:Carbamidomethylation:1000.00	31.76	1093.44	-0.8	547.726	24.45	NP_666077.2 lcl|GPHN_4:8-2326_ORF1_GPHN_4:7:2325, XP_006515962.1, XP_006515963.1, XP_006515964.1, XP_006515965.1, XP_006515966.1, XP_006515967.1, XP_006515968.1 lcl|GPHN_38:8-2365_ORF1_GPHN_38:7:2364, XP_006515969.1 lcl|GPHN_3:8-2257_ORF1_GPHN_3:7:2256, XP_006515970.1 lcl|GPHN_1:8-2218_ORF1_GPHN_1:7:2217, XP_017170562.1, XP_017170563.1, XP_017170564.1, XP_017170565.1 lcl|GPHN_29:8-2323_ORF1_GPHN_…
DWCDEKELN	DWC(+57.02)DEKELN	C3:Carbamidomethylation:1000.00	37.65	1207.48	0.4	604.748	22.63	NP_666077.2 lcl|GPHN_4:8-2326_ORF1_GPHN_4:7:2325, XP_006515962.1, XP_006515963.1, XP_006515964.1, XP_006515965.1, XP_006515966.1, XP_006515967.1, XP_006515968.1 lcl|GPHN_38:8-2365_ORF1_GPHN_38:7:2364, XP_006515969.1 lcl|GPHN_3:8-2257_ORF1_GPHN_3:7:2256, XP_006515970.1 lcl|GPHN_1:8-2218_ORF1_GPHN_1:7:2217, XP_017170562.1, XP_017170563.1, XP_017170564.1, XP_017170565.1 lcl|GPHN_29:8-2323_ORF1_GPHN_…
DWCDEKELNL	DWC(+57.02)DEKELNL	C3:Carbamidomethylation:1000.00	28.23	1320.57	-4.4	661.287	28.77	NP_666077.2 lcl|GPHN_4:8-2326_ORF1_GPHN_4:7:2325, XP_006515962.1, XP_006515963.1, XP_006515964.1, XP_006515965.1, XP_006515966.1, XP_006515967.1, XP_006515968.1 lcl|GPHN_38:8-2365_ORF1_GPHN_38:7:2364, XP_006515969.1 lcl|GPHN_3:8-2257_ORF1_GPHN_3:7:2256, XP_006515970.1 lcl|GPHN_1:8-2218_ORF1_GPHN_1:7:2217, XP_017170562.1, XP_017170563.1, XP_017170564.1, XP_017170565.1 lcl|GPHN_29:8-2323_ORF1_GPHN_…
DWCDEKELNLI	DWC(+57.02)DEKELNLI	C3:Carbamidomethylation:1000.00	38.37	1433.65	3	717.834	32.04	NP_666077.2 lcl|GPHN_4:8-2326_ORF1_GPHN_4:7:2325, XP_006515962.1, XP_006515963.1, XP_006515964.1, XP_006515965.1, XP_006515966.1, XP_006515967.1, XP_006515968.1 lcl|GPHN_38:8-2365_ORF1_GPHN_38:7:2364, XP_006515969.1 lcl|GPHN_3:8-2257_ORF1_GPHN_3:7:2256, XP_006515970.1 lcl|GPHN_1:8-2218_ORF1_GPHN_1:7:2217, XP_017170562.1, XP_017170563.1, XP_017170564.1, XP_017170565.1 lcl|GPHN_29:8-2323_ORF1_GPHN_…
DWCDEKELNLIL	DWC(+57.02)DEKELNLIL	C3:Carbamidomethylation:1000.00	23.44	1546.73	2.1	774.376	30.8	NP_666077.2 lcl|GPHN_4:8-2326_ORF1_GPHN_4:7:2325, XP_006515962.1, XP_006515963.1, XP_006515964.1, XP_006515965.1, XP_006515966.1, XP_006515967.1, XP_006515968.1 lcl|GPHN_38:8-2365_ORF1_GPHN_38:7:2364, XP_006515969.1 lcl|GPHN_3:8-2257_ORF1_GPHN_3:7:2256, XP_006515970.1 lcl|GPHN_1:8-2218_ORF1_GPHN_1:7:2217, XP_017170562.1, XP_017170563.1, XP_017170564.1, XP_017170565.1 lcl|GPHN_29:8-2323_ORF1_GPHN_…
EAPGMALAM	EAPGMALAM(+15.99)	M9:Oxidation (M):41.04	25.57	905.399	0.2	453.707	25.06	NP_666077.2 lcl|GPHN_4:8-2326_ORF1_GPHN_4:7:2325, XP_006515962.1, XP_006515963.1, XP_006515964.1, XP_006515965.1, XP_006515966.1, XP_006515967.1, XP_006515968.1 lcl|GPHN_38:8-2365_ORF1_GPHN_38:7:2364, XP_006515969.1 lcl|GPHN_3:8-2257_ORF1_GPHN_3:7:2256, XP_006515970.1 lcl|GPHN_1:8-2218_ORF1_GPHN_1:7:2217, XP_017170562.1, XP_017170563.1, XP_017170564.1, XP_017170565.1 lcl|GPHN_29:8-2323_ORF1_GPHN_…
EAPGMALAM	EAPGM(+15.99)ALAM(+15.99)	M5:Oxidation (M):1000.00;M9:Oxidation (M):1000.00	22	921.394	-0.2	461.704	20.68	NP_666077.2 lcl|GPHN_4:8-2326_ORF1_GPHN_4:7:2325, XP_006515962.1, XP_006515963.1, XP_006515964.1, XP_006515965.1, XP_006515966.1, XP_006515967.1, XP_006515968.1 lcl|GPHN_38:8-2365_ORF1_GPHN_38:7:2364, XP_006515969.1 lcl|GPHN_3:8-2257_ORF1_GPHN_3:7:2256, XP_006515970.1 lcl|GPHN_1:8-2218_ORF1_GPHN_1:7:2217, XP_017170562.1, XP_017170563.1, XP_017170564.1, XP_017170565.1 lcl|GPHN_29:8-2323_ORF1_GPHN_…
EAPGMALAMLM	EAPGMALAM(+15.99)LM(+15.99)	M9:Oxidation (M):48.97;M11:Oxidation (M):71.79	34.27	1165.52	0.2	583.766	30.71	NP_666077.2 lcl|GPHN_4:8-2326_ORF1_GPHN_4:7:2325, XP_006515962.1, XP_006515963.1, XP_006515964.1, XP_006515965.1, XP_006515966.1, XP_006515967.1, XP_006515968.1 lcl|GPHN_38:8-2365_ORF1_GPHN_38:7:2364, XP_006515969.1 lcl|GPHN_3:8-2257_ORF1_GPHN_3:7:2256, XP_006515970.1 lcl|GPHN_1:8-2218_ORF1_GPHN_1:7:2217, XP_017170562.1, XP_017170563.1, XP_017170564.1, XP_017170565.1 lcl|GPHN_29:8-2323_ORF1_GPHN_…
EAPGMALAMLM	EAPGMALAMLM(+15.99)	M11:Oxidation (M):45.01	29.59	1149.52	0.5	575.769	34.3	NP_666077.2 lcl|GPHN_4:8-2326_ORF1_GPHN_4:7:2325, XP_006515962.1, XP_006515963.1, XP_006515964.1, XP_006515965.1, XP_006515966.1, XP_006515967.1, XP_006515968.1 lcl|GPHN_38:8-2365_ORF1_GPHN_38:7:2364, XP_006515969.1 lcl|GPHN_3:8-2257_ORF1_GPHN_3:7:2256, XP_006515970.1 lcl|GPHN_1:8-2218_ORF1_GPHN_1:7:2217, XP_017170562.1, XP_017170563.1, XP_017170564.1, XP_017170565.1 lcl|GPHN_29:8-2323_ORF1_GPHN_…
EAPGMALAMLM	EAPGM(+15.99)ALAM(+15.99)LM	M5:Oxidation (M):54.91;M9:Oxidation (M):36.05	25.95	1165.52	0	583.766	33.7	NP_666077.2 lcl|GPHN_4:8-2326_ORF1_GPHN_4:7:2325, XP_006515962.1, XP_006515963.1, XP_006515964.1, XP_006515965.1, XP_006515966.1, XP_006515967.1, XP_006515968.1 lcl|GPHN_38:8-2365_ORF1_GPHN_38:7:2364, XP_006515969.1 lcl|GPHN_3:8-2257_ORF1_GPHN_3:7:2256, XP_006515970.1 lcl|GPHN_1:8-2218_ORF1_GPHN_1:7:2217, XP_017170562.1, XP_017170563.1, XP_017170564.1, XP_017170565.1 lcl|GPHN_29:8-2323_ORF1_GPHN_…
EAPGMALAMLM	EAPGMALAMLM		21.1	1133.53	-0.3	567.771	38.8	NP_666077.2 lcl|GPHN_4:8-2326_ORF1_GPHN_4:7:2325, XP_006515962.1, XP_006515963.1, XP_006515964.1, XP_006515965.1, XP_006515966.1, XP_006515967.1, XP_006515968.1 lcl|GPHN_38:8-2365_ORF1_GPHN_38:7:2364, XP_006515969.1 lcl|GPHN_3:8-2257_ORF1_GPHN_3:7:2256, XP_006515970.1 lcl|GPHN_1:8-2218_ORF1_GPHN_1:7:2217, XP_017170562.1, XP_017170563.1, XP_017170564.1, XP_017170565.1 lcl|GPHN_29:8-2323_ORF1_GPHN_…
EAPGMALAMLM	EAPGM(+15.99)ALAMLM	M5:Oxidation (M):20.17	20	1149.52	-0.9	575.768	36.11	NP_666077.2 lcl|GPHN_4:8-2326_ORF1_GPHN_4:7:2325, XP_006515962.1, XP_006515963.1, XP_006515964.1, XP_006515965.1, XP_006515966.1, XP_006515967.1, XP_006515968.1 lcl|GPHN_38:8-2365_ORF1_GPHN_38:7:2364, XP_006515969.1 lcl|GPHN_3:8-2257_ORF1_GPHN_3:7:2256, XP_006515970.1 lcl|GPHN_1:8-2218_ORF1_GPHN_1:7:2217, XP_017170562.1, XP_017170563.1, XP_017170564.1, XP_017170565.1 lcl|GPHN_29:8-2323_ORF1_GPHN_…
EAPGMALAMLMGSL	EAPGMALAM(+15.99)LMGSL	M9:Oxidation (M):0.00	32.77	1406.66	-0.4	704.337	39.39	NP_666077.2 lcl|GPHN_4:8-2326_ORF1_GPHN_4:7:2325, XP_006515962.1, XP_006515963.1, XP_006515964.1, XP_006515965.1, XP_006515966.1, XP_006515967.1, XP_006515968.1 lcl|GPHN_38:8-2365_ORF1_GPHN_38:7:2364, XP_006515969.1 lcl|GPHN_3:8-2257_ORF1_GPHN_3:7:2256, XP_006515970.1 lcl|GPHN_1:8-2218_ORF1_GPHN_1:7:2217, XP_017170562.1, XP_017170563.1, XP_017170564.1, XP_017170565.1 lcl|GPHN_29:8-2323_ORF1_GPHN_…
EAPGMALAMLMGSL	EAPGM(+15.99)ALAM(+15.99)LMGSL	M5:Oxidation (M):41.57;M9:Oxidation (M):32.28	32.22	1422.66	3.1	712.337	39.28	NP_666077.2 lcl|GPHN_4:8-2326_ORF1_GPHN_4:7:2325, XP_006515962.1, XP_006515963.1, XP_006515964.1, XP_006515965.1, XP_006515966.1, XP_006515967.1, XP_006515968.1 lcl|GPHN_38:8-2365_ORF1_GPHN_38:7:2364, XP_006515969.1 lcl|GPHN_3:8-2257_ORF1_GPHN_3:7:2256, XP_006515970.1 lcl|GPHN_1:8-2218_ORF1_GPHN_1:7:2217, XP_017170562.1, XP_017170563.1, XP_017170564.1, XP_017170565.1 lcl|GPHN_29:8-2323_ORF1_GPHN_…
EAPGMALAMLMGSL	EAPGM(+15.99)ALAMLM(+15.99)GSL	M5:Oxidation (M):22.37;M11:Oxidation (M):36.05	28.2	1422.66	-2.1	712.334	35.95	NP_666077.2 lcl|GPHN_4:8-2326_ORF1_GPHN_4:7:2325, XP_006515962.1, XP_006515963.1, XP_006515964.1, XP_006515965.1, XP_006515966.1, XP_006515967.1, XP_006515968.1 lcl|GPHN_38:8-2365_ORF1_GPHN_38:7:2364, XP_006515969.1 lcl|GPHN_3:8-2257_ORF1_GPHN_3:7:2256, XP_006515970.1 lcl|GPHN_1:8-2218_ORF1_GPHN_1:7:2217, XP_017170562.1, XP_017170563.1, XP_017170564.1, XP_017170565.1 lcl|GPHN_29:8-2323_ORF1_GPHN_…
EAPGMALAMLMGSLNVTPL	EAPGM(+15.99)ALAM(+15.99)LM(+15.99)GSLNVTPL	M5:Oxidation (M):1000.00;M9:Oxidation (M):1000.00;M11:Oxidation (M):1000.00	18.12	1962.95	0.4	655.323	36.92	NP_666077.2 lcl|GPHN_4:8-2326_ORF1_GPHN_4:7:2325, XP_006515962.1, XP_006515963.1, XP_006515964.1, XP_006515965.1, XP_006515966.1, XP_006515967.1, XP_006515968.1 lcl|GPHN_38:8-2365_ORF1_GPHN_38:7:2364, XP_006515969.1 lcl|GPHN_3:8-2257_ORF1_GPHN_3:7:2256, XP_006515970.1 lcl|GPHN_1:8-2218_ORF1_GPHN_1:7:2217, XP_017170562.1, XP_017170563.1, XP_017170564.1, XP_017170565.1 lcl|GPHN_29:8-2323_ORF1_GPHN_…
EAPGMALAMLMGSLNVTPLGMLSR	EAPGMALAM(+15.99)LM(+15.99)GSLNVTPLGMLSR	M9:Oxidation (M):31.27;M11:Oxidation (M):57.71	69.34	2491.23	0.4	831.418	37.16	NP_666077.2 lcl|GPHN_4:8-2326_ORF1_GPHN_4:7:2325, XP_006515962.1, XP_006515963.1, XP_006515964.1, XP_006515965.1, XP_006515966.1, XP_006515967.1, XP_006515968.1 lcl|GPHN_38:8-2365_ORF1_GPHN_38:7:2364, XP_006515969.1 lcl|GPHN_3:8-2257_ORF1_GPHN_3:7:2256, XP_006515970.1 lcl|GPHN_1:8-2218_ORF1_GPHN_1:7:2217, XP_017170562.1, XP_017170563.1, XP_017170564.1, XP_017170565.1 lcl|GPHN_29:8-2323_ORF1_GPHN_…
EAPGMALAMLMGSLNVTPLGMLSR	EAPGMALAMLM(+15.99)GSLNVTPLGMLSR	M11:Oxidation (M):46.20	69.22	2475.24	1.5	826.087	39.01	NP_666077.2 lcl|GPHN_4:8-2326_ORF1_GPHN_4:7:2325, XP_006515962.1, XP_006515963.1, XP_006515964.1, XP_006515965.1, XP_006515966.1, XP_006515967.1, XP_006515968.1 lcl|GPHN_38:8-2365_ORF1_GPHN_38:7:2364, XP_006515969.1 lcl|GPHN_3:8-2257_ORF1_GPHN_3:7:2256, XP_006515970.1 lcl|GPHN_1:8-2218_ORF1_GPHN_1:7:2217, XP_017170562.1, XP_017170563.1, XP_017170564.1, XP_017170565.1 lcl|GPHN_29:8-2323_ORF1_GPHN_…
EAPGMALAMLMGSLNVTPLGMLSR	EAPGMALAM(+15.99)LM(+15.99)GSLNVTPLGM(+15.99)LSR	M9:Oxidation (M):28.74;M11:Oxidation (M):49.37;M21:Oxidation (M):107.71	68.28	2507.23	-1.2	836.748	35.36	NP_666077.2 lcl|GPHN_4:8-2326_ORF1_GPHN_4:7:2325, XP_006515962.1, XP_006515963.1, XP_006515964.1, XP_006515965.1, XP_006515966.1, XP_006515967.1, XP_006515968.1 lcl|GPHN_38:8-2365_ORF1_GPHN_38:7:2364, XP_006515969.1 lcl|GPHN_3:8-2257_ORF1_GPHN_3:7:2256, XP_006515970.1 lcl|GPHN_1:8-2218_ORF1_GPHN_1:7:2217, XP_017170562.1, XP_017170563.1, XP_017170564.1, XP_017170565.1 lcl|GPHN_29:8-2323_ORF1_GPHN_…
EAPGMALAMLMGSLNVTPLGMLSR	EAPGM(+15.99)ALAM(+15.99)LMGSLNVTPLGMLSR	M5:Oxidation (M):71.75;M9:Oxidation (M):48.87	67.79	2491.23	-1.8	1246.62	39.11	NP_666077.2 lcl|GPHN_4:8-2326_ORF1_GPHN_4:7:2325, XP_006515962.1, XP_006515963.1, XP_006515964.1, XP_006515965.1, XP_006515966.1, XP_006515967.1, XP_006515968.1 lcl|GPHN_38:8-2365_ORF1_GPHN_38:7:2364, XP_006515969.1 lcl|GPHN_3:8-2257_ORF1_GPHN_3:7:2256, XP_006515970.1 lcl|GPHN_1:8-2218_ORF1_GPHN_1:7:2217, XP_017170562.1, XP_017170563.1, XP_017170564.1, XP_017170565.1 lcl|GPHN_29:8-2323_ORF1_GPHN_…
EAPGMALAMLMGSLNVTPLGMLSR	EAPGM(+15.99)ALAM(+15.99)LMGSLNVTPLGM(+15.99)LSR	M5:Oxidation (M):42.99;M9:Oxidation (M):33.18;M21:Oxidation (M):74.64	64.32	2507.23	2.7	836.751	38.93	NP_666077.2 lcl|GPHN_4:8-2326_ORF1_GPHN_4:7:2325, XP_006515962.1, XP_006515963.1, XP_006515964.1, XP_006515965.1, XP_006515966.1, XP_006515967.1, XP_006515968.1 lcl|GPHN_38:8-2365_ORF1_GPHN_38:7:2364, XP_006515969.1 lcl|GPHN_3:8-2257_ORF1_GPHN_3:7:2256, XP_006515970.1 lcl|GPHN_1:8-2218_ORF1_GPHN_1:7:2217, XP_017170562.1, XP_017170563.1, XP_017170564.1, XP_017170565.1 lcl|GPHN_29:8-2323_ORF1_GPHN_…
EAPGMALAMLMGSLNVTPLGMLSR	EAPGM(+15.99)ALAMLM(+15.99)GSLNVTPLGM(+15.99)LSR	M5:Oxidation (M):46.31;M11:Oxidation (M):42.28;M21:Oxidation (M):45.26	61.74	2507.23	-0.5	1254.62	36.11	NP_666077.2 lcl|GPHN_4:8-2326_ORF1_GPHN_4:7:2325, XP_006515962.1, XP_006515963.1, XP_006515964.1, XP_006515965.1, XP_006515966.1, XP_006515967.1, XP_006515968.1 lcl|GPHN_38:8-2365_ORF1_GPHN_38:7:2364, XP_006515969.1 lcl|GPHN_3:8-2257_ORF1_GPHN_3:7:2256, XP_006515970.1 lcl|GPHN_1:8-2218_ORF1_GPHN_1:7:2217, XP_017170562.1, XP_017170563.1, XP_017170564.1, XP_017170565.1 lcl|GPHN_29:8-2323_ORF1_GPHN_…
EAPGMALAMLMGSLNVTPLGMLSR	EAPGM(+15.99)ALAMLM(+15.99)GSLNVTPLGMLSR	M5:Oxidation (M):25.11;M11:Oxidation (M):9.40	59.65	2491.23	0.3	1246.62	38.04	NP_666077.2 lcl|GPHN_4:8-2326_ORF1_GPHN_4:7:2325, XP_006515962.1, XP_006515963.1, XP_006515964.1, XP_006515965.1, XP_006515966.1, XP_006515967.1, XP_006515968.1 lcl|GPHN_38:8-2365_ORF1_GPHN_38:7:2364, XP_006515969.1 lcl|GPHN_3:8-2257_ORF1_GPHN_3:7:2256, XP_006515970.1 lcl|GPHN_1:8-2218_ORF1_GPHN_1:7:2217, XP_017170562.1, XP_017170563.1, XP_017170564.1, XP_017170565.1 lcl|GPHN_29:8-2323_ORF1_GPHN_…
EAPGMALAMLMGSLNVTPLGMLSR	EAPGMALAMLM(+15.99)GSLNVTPLGM(+15.99)LSR	M11:Oxidation (M):9.40;M21:Oxidation (M):30.14	52.48	2491.23	-0.4	623.815	37.47	NP_666077.2 lcl|GPHN_4:8-2326_ORF1_GPHN_4:7:2325, XP_006515962.1, XP_006515963.1, XP_006515964.1, XP_006515965.1, XP_006515966.1, XP_006515967.1, XP_006515968.1 lcl|GPHN_38:8-2365_ORF1_GPHN_38:7:2364, XP_006515969.1 lcl|GPHN_3:8-2257_ORF1_GPHN_3:7:2256, XP_006515970.1 lcl|GPHN_1:8-2218_ORF1_GPHN_1:7:2217, XP_017170562.1, XP_017170563.1, XP_017170564.1, XP_017170565.1 lcl|GPHN_29:8-2323_ORF1_GPHN_…
EAPGMALAMLMGSLNVTPLGMLSR	EAPGM(+15.99)ALAMLMGSLNVTPLGMLSR	M5:Oxidation (M):11.12	47.97	2475.24	-5.6	826.081	34.45	NP_666077.2 lcl|GPHN_4:8-2326_ORF1_GPHN_4:7:2325, XP_006515962.1, XP_006515963.1, XP_006515964.1, XP_006515965.1, XP_006515966.1, XP_006515967.1, XP_006515968.1 lcl|GPHN_38:8-2365_ORF1_GPHN_38:7:2364, XP_006515969.1 lcl|GPHN_3:8-2257_ORF1_GPHN_3:7:2256, XP_006515970.1 lcl|GPHN_1:8-2218_ORF1_GPHN_1:7:2217, XP_017170562.1, XP_017170563.1, XP_017170564.1, XP_017170565.1 lcl|GPHN_29:8-2323_ORF1_GPHN_…
EAPGMALAMLMGSLNVTPLGMLSR	EAPGMALAM(+15.99)LMGSLNVTPLGM(+15.99)LSR	M9:Oxidation (M):8.26;M21:Oxidation (M):44.14	41.9	2491.23	0.5	831.418	39.11	NP_666077.2 lcl|GPHN_4:8-2326_ORF1_GPHN_4:7:2325, XP_006515962.1, XP_006515963.1, XP_006515964.1, XP_006515965.1, XP_006515966.1, XP_006515967.1, XP_006515968.1 lcl|GPHN_38:8-2365_ORF1_GPHN_38:7:2364, XP_006515969.1 lcl|GPHN_3:8-2257_ORF1_GPHN_3:7:2256, XP_006515970.1 lcl|GPHN_1:8-2218_ORF1_GPHN_1:7:2217, XP_017170562.1, XP_017170563.1, XP_017170564.1, XP_017170565.1 lcl|GPHN_29:8-2323_ORF1_GPHN_…
EAPGMALAMLMGSLNVTPLGMLSR	EAPGMALAMLMGSLNVTPLGM(+15.99)LSR	M21:Oxidation (M):55.57	40.8	2475.24	-5.6	826.081	34.45	NP_666077.2 lcl|GPHN_4:8-2326_ORF1_GPHN_4:7:2325, XP_006515962.1, XP_006515963.1, XP_006515964.1, XP_006515965.1, XP_006515966.1, XP_006515967.1, XP_006515968.1 lcl|GPHN_38:8-2365_ORF1_GPHN_38:7:2364, XP_006515969.1 lcl|GPHN_3:8-2257_ORF1_GPHN_3:7:2256, XP_006515970.1 lcl|GPHN_1:8-2218_ORF1_GPHN_1:7:2217, XP_017170562.1, XP_017170563.1, XP_017170564.1, XP_017170565.1 lcl|GPHN_29:8-2323_ORF1_GPHN_…
EAPGMALAMLMGSLNVTPLGMLSR	EAPGMALAMLMGSLNVTPLGMLSR		27.28	2459.24	-5.2	820.75	36.56	NP_666077.2 lcl|GPHN_4:8-2326_ORF1_GPHN_4:7:2325, XP_006515962.1, XP_006515963.1, XP_006515964.1, XP_006515965.1, XP_006515966.1, XP_006515967.1, XP_006515968.1 lcl|GPHN_38:8-2365_ORF1_GPHN_38:7:2364, XP_006515969.1 lcl|GPHN_3:8-2257_ORF1_GPHN_3:7:2256, XP_006515970.1 lcl|GPHN_1:8-2218_ORF1_GPHN_1:7:2217, XP_017170562.1, XP_017170563.1, XP_017170564.1, XP_017170565.1 lcl|GPHN_29:8-2323_ORF1_GPHN_…
EAPGMALAMLMGSLNVTPLGMLSR	EAPGMALAM(+15.99)LMGSLNVTPLGMLSR	M9:Oxidation (M):0.00	25.84	2475.24	0.1	826.086	39.01	NP_666077.2 lcl|GPHN_4:8-2326_ORF1_GPHN_4:7:2325, XP_006515962.1, XP_006515963.1, XP_006515964.1, XP_006515965.1, XP_006515966.1, XP_006515967.1, XP_006515968.1 lcl|GPHN_38:8-2365_ORF1_GPHN_38:7:2364, XP_006515969.1 lcl|GPHN_3:8-2257_ORF1_GPHN_3:7:2256, XP_006515970.1 lcl|GPHN_1:8-2218_ORF1_GPHN_1:7:2217, XP_017170562.1, XP_017170563.1, XP_017170564.1, XP_017170565.1 lcl|GPHN_29:8-2323_ORF1_GPHN_…
EAPGMALAMLMGSLNVTPLGMLSR	EAPGMALAMLMGS(+79.97)LNVTPLGMLSR	S13:Phosphorylation (STY):28.70	22.23	2539.21	6.3	847.415	37.03	NP_666077.2 lcl|GPHN_4:8-2326_ORF1_GPHN_4:7:2325, XP_006515962.1, XP_006515963.1, XP_006515964.1, XP_006515965.1, XP_006515966.1, XP_006515967.1, XP_006515968.1 lcl|GPHN_38:8-2365_ORF1_GPHN_38:7:2364, XP_006515969.1 lcl|GPHN_3:8-2257_ORF1_GPHN_3:7:2256, XP_006515970.1 lcl|GPHN_1:8-2218_ORF1_GPHN_1:7:2217, XP_017170562.1, XP_017170563.1, XP_017170564.1, XP_017170565.1 lcl|GPHN_29:8-2323_ORF1_GPHN_…
EAPGMALAMLMGSLNVTPLGMLSRPVCGIR	EAPGMALAM(+15.99)LMGSLNVTPLGM(+15.99)LSRPVC(+57.02)GIR	M9:Oxidation (M):22.85;M21:Oxidation (M):44.14;C27:Carbamidomethylation:1000.00	37.82	3173.59	-1.2	794.404	37.36	NP_666077.2 lcl|GPHN_4:8-2326_ORF1_GPHN_4:7:2325, XP_006515962.1, XP_006515963.1, XP_006515964.1, XP_006515965.1, XP_006515966.1, XP_006515967.1, XP_006515968.1 lcl|GPHN_38:8-2365_ORF1_GPHN_38:7:2364, XP_006515969.1 lcl|GPHN_3:8-2257_ORF1_GPHN_3:7:2256, XP_006515970.1 lcl|GPHN_1:8-2218_ORF1_GPHN_1:7:2217, XP_017170562.1, XP_017170563.1, XP_017170564.1, XP_017170565.1 lcl|GPHN_29:8-2323_ORF1_GPHN_…
EAPGMALAMLMGSLNVTPLGMLSRPVCGIR	EAPGMALAM(+15.99)LM(+15.99)GSLNVTPLGMLSRPVC(+57.02)GIR	M9:Oxidation (M):4.73;M11:Oxidation (M):9.45;C27:Carbamidomethylation:1000.00	33.04	3173.59	1.7	794.406	35.36	NP_666077.2 lcl|GPHN_4:8-2326_ORF1_GPHN_4:7:2325, XP_006515962.1, XP_006515963.1, XP_006515964.1, XP_006515965.1, XP_006515966.1, XP_006515967.1, XP_006515968.1 lcl|GPHN_38:8-2365_ORF1_GPHN_38:7:2364, XP_006515969.1 lcl|GPHN_3:8-2257_ORF1_GPHN_3:7:2256, XP_006515970.1 lcl|GPHN_1:8-2218_ORF1_GPHN_1:7:2217, XP_017170562.1, XP_017170563.1, XP_017170564.1, XP_017170565.1 lcl|GPHN_29:8-2323_ORF1_GPHN_…
EAPGMALAMLMGSLNVTPLGMLSRPVCGIRG	EAPGMALAM(+15.99)LM(+15.99)GSLNVTPLGM(+15.99)LSRPVCGIRG	M9:Oxidation (M):25.11;M11:Oxidation (M):30.10;M21:Oxidation (M):67.56	55.57	3189.58	0.2	798.403	33.56	NP_666077.2 lcl|GPHN_4:8-2326_ORF1_GPHN_4:7:2325, XP_006515962.1, XP_006515963.1, XP_006515964.1, XP_006515965.1, XP_006515966.1, XP_006515967.1, XP_006515968.1 lcl|GPHN_38:8-2365_ORF1_GPHN_38:7:2364, XP_006515969.1 lcl|GPHN_3:8-2257_ORF1_GPHN_3:7:2256, XP_006515970.1 lcl|GPHN_1:8-2218_ORF1_GPHN_1:7:2217, XP_017170562.1, XP_017170563.1, XP_017170564.1, XP_017170565.1 lcl|GPHN_29:8-2323_ORF1_GPHN_…
EAPGMALAMLMGSLNVTPLGMLSRPVCGIRG	EAPGM(+15.99)ALAM(+15.99)LMGSLNVTPLGM(+15.99)LSRPVCGIRG	M5:Oxidation (M):47.92;M9:Oxidation (M):39.76;M21:Oxidation (M):35.88	50.86	3189.58	-0.2	798.403	36.72	NP_666077.2 lcl|GPHN_4:8-2326_ORF1_GPHN_4:7:2325, XP_006515962.1, XP_006515963.1, XP_006515964.1, XP_006515965.1, XP_006515966.1, XP_006515967.1, XP_006515968.1 lcl|GPHN_38:8-2365_ORF1_GPHN_38:7:2364, XP_006515969.1 lcl|GPHN_3:8-2257_ORF1_GPHN_3:7:2256, XP_006515970.1 lcl|GPHN_1:8-2218_ORF1_GPHN_1:7:2217, XP_017170562.1, XP_017170563.1, XP_017170564.1, XP_017170565.1 lcl|GPHN_29:8-2323_ORF1_GPHN_…
EAPGMALAMLMGSLNVTPLGMLSRPVCGIRG	EAPGM(+15.99)ALAM(+15.99)LM(+15.99)GSLNVTPLGMLSRPVCGIRG	M5:Oxidation (M):122.77;M9:Oxidation (M):111.64;M11:Oxidation (M):128.04	36.78	3189.58	-4.8	798.399	34.65	NP_666077.2 lcl|GPHN_4:8-2326_ORF1_GPHN_4:7:2325, XP_006515962.1, XP_006515963.1, XP_006515964.1, XP_006515965.1, XP_006515966.1, XP_006515967.1, XP_006515968.1 lcl|GPHN_38:8-2365_ORF1_GPHN_38:7:2364, XP_006515969.1 lcl|GPHN_3:8-2257_ORF1_GPHN_3:7:2256, XP_006515970.1 lcl|GPHN_1:8-2218_ORF1_GPHN_1:7:2217, XP_017170562.1, XP_017170563.1, XP_017170564.1, XP_017170565.1 lcl|GPHN_29:8-2323_ORF1_GPHN_…
EDKGVQCEEEEEEKKDSGVA	EDKGVQC(+57.02)EEEEEEKKDSGVA	C7:Carbamidomethylation:1000.00	34.08	2293.99	0.6	765.67	16.43	NP_666077.2 lcl|GPHN_4:8-2326_ORF1_GPHN_4:7:2325, XP_006515962.1, XP_006515963.1, XP_006515964.1, XP_006515965.1, XP_006515966.1, XP_006515967.1, XP_006515968.1 lcl|GPHN_38:8-2365_ORF1_GPHN_38:7:2364, XP_006515969.1 lcl|GPHN_3:8-2257_ORF1_GPHN_3:7:2256, XP_006515970.1 lcl|GPHN_1:8-2218_ORF1_GPHN_1:7:2217, XP_017170562.1, XP_017170563.1, XP_017170564.1, XP_017170565.1 lcl|GPHN_29:8-2323_ORF1_GPHN_…
EDRSGINLKDLVQDPS	EDRSGINLKDLVQDPS		36.46	1784.89	-0.3	595.971	26.25	NP_666077.2 lcl|GPHN_4:8-2326_ORF1_GPHN_4:7:2325, XP_006515962.1, XP_006515963.1, XP_006515964.1, XP_006515965.1, XP_006515966.1, XP_006515967.1, XP_006515968.1 lcl|GPHN_38:8-2365_ORF1_GPHN_38:7:2364, XP_006515969.1 lcl|GPHN_3:8-2257_ORF1_GPHN_3:7:2256, XP_006515970.1 lcl|GPHN_1:8-2218_ORF1_GPHN_1:7:2217, XP_017170562.1, XP_017170563.1, XP_017170564.1, XP_017170565.1 lcl|GPHN_29:8-2323_ORF1_GPHN_…
EDRSGINLKDLVQDPSLL	EDRSGINLKDLVQDPSLL		35.92	2011.06	0.7	671.361	31.94	NP_666077.2 lcl|GPHN_4:8-2326_ORF1_GPHN_4:7:2325, XP_006515962.1, XP_006515963.1, XP_006515964.1, XP_006515965.1, XP_006515966.1, XP_006515967.1, XP_006515968.1 lcl|GPHN_38:8-2365_ORF1_GPHN_38:7:2364, XP_006515969.1 lcl|GPHN_3:8-2257_ORF1_GPHN_3:7:2256, XP_006515970.1 lcl|GPHN_1:8-2218_ORF1_GPHN_1:7:2217, XP_017170562.1, XP_017170563.1, XP_017170564.1, XP_017170565.1 lcl|GPHN_29:8-2323_ORF1_GPHN_…
EDSSSSHITAAALAAK	EDSSSSHITAAALAAK		40.83	1557.76	1.5	520.263	19.75	NP_666077.2 lcl|GPHN_4:8-2326_ORF1_GPHN_4:7:2325, XP_006515962.1, XP_006515963.1, XP_006515964.1, XP_006515965.1, XP_006515966.1, XP_006515967.1, XP_006515968.1 lcl|GPHN_38:8-2365_ORF1_GPHN_38:7:2364, XP_006515969.1 lcl|GPHN_3:8-2257_ORF1_GPHN_3:7:2256, XP_006515970.1 lcl|GPHN_1:8-2218_ORF1_GPHN_1:7:2217, XP_017170562.1, XP_017170563.1, XP_017170564.1, XP_017170565.1 lcl|GPHN_29:8-2323_ORF1_GPHN_…
EDTELIRESDDGTEELEV	EDTELIRESDDGTEELEV		39.33	2077.92	1	1039.97	28.63	NP_666077.2 lcl|GPHN_4:8-2326_ORF1_GPHN_4:7:2325, XP_006515962.1, XP_006515963.1, XP_006515964.1, XP_006515965.1, XP_006515966.1, XP_006515967.1, XP_006515968.1 lcl|GPHN_38:8-2365_ORF1_GPHN_38:7:2364, XP_006515969.1 lcl|GPHN_3:8-2257_ORF1_GPHN_3:7:2256, XP_006515970.1 lcl|GPHN_1:8-2218_ORF1_GPHN_1:7:2217, XP_017170562.1, XP_017170563.1, XP_017170564.1, XP_017170565.1 lcl|GPHN_29:8-2323_ORF1_GPHN_…
EEEEEEKKDSGVASTEDSSSSH	EEEEEEKKDSGVASTEDSSSSH		35.58	2394.98	1.6	599.753	13.87	NP_666077.2 lcl|GPHN_4:8-2326_ORF1_GPHN_4:7:2325, XP_006515962.1, XP_006515963.1, XP_006515964.1, XP_006515965.1, XP_006515966.1, XP_006515967.1, XP_006515968.1 lcl|GPHN_38:8-2365_ORF1_GPHN_38:7:2364, XP_006515969.1 lcl|GPHN_3:8-2257_ORF1_GPHN_3:7:2256, XP_006515970.1 lcl|GPHN_1:8-2218_ORF1_GPHN_1:7:2217, XP_017170562.1, XP_017170563.1, XP_017170564.1, XP_017170565.1 lcl|GPHN_29:8-2323_ORF1_GPHN_…
EEEEKKDSGVASTEDSSSSH	EEEEKKDSGVASTEDSSSSH		38.4	2136.89	-0.6	713.305	12.74	NP_666077.2 lcl|GPHN_4:8-2326_ORF1_GPHN_4:7:2325, XP_006515962.1, XP_006515963.1, XP_006515964.1, XP_006515965.1, XP_006515966.1, XP_006515967.1, XP_006515968.1 lcl|GPHN_38:8-2365_ORF1_GPHN_38:7:2364, XP_006515969.1 lcl|GPHN_3:8-2257_ORF1_GPHN_3:7:2256, XP_006515970.1 lcl|GPHN_1:8-2218_ORF1_GPHN_1:7:2217, XP_017170562.1, XP_017170563.1, XP_017170564.1, XP_017170565.1 lcl|GPHN_29:8-2323_ORF1_GPHN_…
EGLKDELWR	EGLKDELWR		28.77	1144.59	-1.7	382.536	23.37	XP_006515962.1, XP_006515963.1, XP_006515964.1, XP_006515966.1, XP_006515967.1, XP_017170562.1, XP_017170563.1, XP_017170565.1 lcl|GPHN_29:8-2323_ORF1_GPHN_29:7:2322, XP_017170568.1, XP_030102590.1 lcl|GPHN_41:8-2320_ORF1_GPHN_41:7:2319, XP_030102591.1 lcl|GPHN_8:8-2281_ORF1_GPHN_8:7:2280, XP_030102592.1, lcl|GPHN_103:8-2287_ORF1_GPHN_103:7:2286, lcl|GPHN_106:8-1873_ORF1_GPHN_106:7:1872, lcl|GPHN…
EGLKDELWRNRGYDLRVQ	EGLKDELWRNRGYDLRVQ		32.85	2246.16	-0.9	562.546	24.41	XP_006515962.1, XP_006515963.1, XP_006515964.1, XP_006515966.1, XP_006515967.1, XP_017170562.1, XP_017170563.1, XP_017170565.1 lcl|GPHN_29:8-2323_ORF1_GPHN_29:7:2322, XP_017170568.1, XP_030102590.1 lcl|GPHN_41:8-2320_ORF1_GPHN_41:7:2319, XP_030102591.1 lcl|GPHN_8:8-2281_ORF1_GPHN_8:7:2280, XP_030102592.1, lcl|GPHN_103:8-2287_ORF1_GPHN_103:7:2286, lcl|GPHN_106:8-1873_ORF1_GPHN_106:7:1872, lcl|GPHN…
EHGYPTIN	EHGYPTIN		27.4	929.424	-0.7	465.719	18.81	NP_666077.2 lcl|GPHN_4:8-2326_ORF1_GPHN_4:7:2325, XP_006515962.1, XP_006515963.1, XP_006515964.1, XP_006515965.1, XP_006515966.1, XP_006515967.1, XP_006515968.1 lcl|GPHN_38:8-2365_ORF1_GPHN_38:7:2364, XP_006515969.1 lcl|GPHN_3:8-2257_ORF1_GPHN_3:7:2256, XP_006515970.1 lcl|GPHN_1:8-2218_ORF1_GPHN_1:7:2217, XP_017170562.1, XP_017170563.1, XP_017170564.1, XP_017170565.1 lcl|GPHN_29:8-2323_ORF1_GPHN_…
EHGYPTINL	EHGYPTINL		21.4	1042.51	1.3	522.262	25.76	NP_666077.2 lcl|GPHN_4:8-2326_ORF1_GPHN_4:7:2325, XP_006515962.1, XP_006515963.1, XP_006515964.1, XP_006515965.1, XP_006515966.1, XP_006515967.1, XP_006515968.1 lcl|GPHN_38:8-2365_ORF1_GPHN_38:7:2364, XP_006515969.1 lcl|GPHN_3:8-2257_ORF1_GPHN_3:7:2256, XP_006515970.1 lcl|GPHN_1:8-2218_ORF1_GPHN_1:7:2217, XP_017170562.1, XP_017170563.1, XP_017170564.1, XP_017170565.1 lcl|GPHN_29:8-2323_ORF1_GPHN_…
EHGYPTINLG	EHGYPTINLG		35.24	1099.53	-0.4	550.772	24.79	NP_666077.2 lcl|GPHN_4:8-2326_ORF1_GPHN_4:7:2325, XP_006515962.1, XP_006515963.1, XP_006515964.1, XP_006515965.1, XP_006515966.1, XP_006515967.1, XP_006515968.1 lcl|GPHN_38:8-2365_ORF1_GPHN_38:7:2364, XP_006515969.1 lcl|GPHN_3:8-2257_ORF1_GPHN_3:7:2256, XP_006515970.1 lcl|GPHN_1:8-2218_ORF1_GPHN_1:7:2217, XP_017170562.1, XP_017170563.1, XP_017170564.1, XP_017170565.1 lcl|GPHN_29:8-2323_ORF1_GPHN_…
EHGYPTINLGIVGDNPDDLLNAL	EHGYPTINLGIVGDNPDDLLNAL		26.67	2449.21	1.5	1225.62	37.8	NP_666077.2 lcl|GPHN_4:8-2326_ORF1_GPHN_4:7:2325, XP_006515962.1, XP_006515963.1, XP_006515964.1, XP_006515965.1, XP_006515966.1, XP_006515967.1, XP_006515968.1 lcl|GPHN_38:8-2365_ORF1_GPHN_38:7:2364, XP_006515969.1 lcl|GPHN_3:8-2257_ORF1_GPHN_3:7:2256, XP_006515970.1 lcl|GPHN_1:8-2218_ORF1_GPHN_1:7:2217, XP_017170562.1, XP_017170563.1, XP_017170564.1, XP_017170565.1 lcl|GPHN_29:8-2323_ORF1_GPHN_…
EHGYPTINLGIVGDNPDDLLNALNEGISR	EHGYPTINLGIVGDNPDDLLNALNEGISR		69.54	3105.54	-1.9	1036.18	35.95	NP_666077.2 lcl|GPHN_4:8-2326_ORF1_GPHN_4:7:2325, XP_006515962.1, XP_006515963.1, XP_006515964.1, XP_006515965.1, XP_006515966.1, XP_006515967.1, XP_006515968.1 lcl|GPHN_38:8-2365_ORF1_GPHN_38:7:2364, XP_006515969.1 lcl|GPHN_3:8-2257_ORF1_GPHN_3:7:2256, XP_006515970.1 lcl|GPHN_1:8-2218_ORF1_GPHN_1:7:2217, XP_017170562.1, XP_017170563.1, XP_017170564.1, XP_017170565.1 lcl|GPHN_29:8-2323_ORF1_GPHN_…
ELHKGEVVDV	ELHKGEVVDV		33.34	1123.59	0.2	562.801	18.17	NP_666077.2 lcl|GPHN_4:8-2326_ORF1_GPHN_4:7:2325, XP_006515962.1, XP_006515963.1, XP_006515964.1, XP_006515965.1, XP_006515966.1, XP_006515967.1, XP_006515968.1 lcl|GPHN_38:8-2365_ORF1_GPHN_38:7:2364, XP_006515969.1 lcl|GPHN_3:8-2257_ORF1_GPHN_3:7:2256, XP_006515970.1 lcl|GPHN_1:8-2218_ORF1_GPHN_1:7:2217, XP_017170562.1, XP_017170563.1, XP_017170564.1, XP_017170565.1 lcl|GPHN_29:8-2323_ORF1_GPHN_…
ELHKGEVVDVM	ELHKGEVVDVM		38.2	1254.63	-0.6	628.321	20.87	NP_666077.2 lcl|GPHN_4:8-2326_ORF1_GPHN_4:7:2325, XP_006515962.1, XP_006515963.1, XP_006515964.1, XP_006515965.1, XP_006515966.1, XP_006515967.1, XP_006515968.1 lcl|GPHN_38:8-2365_ORF1_GPHN_38:7:2364, XP_006515969.1 lcl|GPHN_3:8-2257_ORF1_GPHN_3:7:2256, XP_006515970.1 lcl|GPHN_1:8-2218_ORF1_GPHN_1:7:2217, XP_017170562.1, XP_017170563.1, XP_017170564.1, XP_017170565.1 lcl|GPHN_29:8-2323_ORF1_GPHN_…
ELHKGEVVDVM	ELHKGEVVDVM(+15.99)	M11:Oxidation (M):1000.00	27.56	1270.62	-4.8	636.316	17.65	NP_666077.2 lcl|GPHN_4:8-2326_ORF1_GPHN_4:7:2325, XP_006515962.1, XP_006515963.1, XP_006515964.1, XP_006515965.1, XP_006515966.1, XP_006515967.1, XP_006515968.1 lcl|GPHN_38:8-2365_ORF1_GPHN_38:7:2364, XP_006515969.1 lcl|GPHN_3:8-2257_ORF1_GPHN_3:7:2256, XP_006515970.1 lcl|GPHN_1:8-2218_ORF1_GPHN_1:7:2217, XP_017170562.1, XP_017170563.1, XP_017170564.1, XP_017170565.1 lcl|GPHN_29:8-2323_ORF1_GPHN_…
ELHKGEVVDVMVI	ELHKGEVVDVM(+15.99)VI	M11:Oxidation (M):1000.00	22.05	1482.78	0.6	742.395	24.21	NP_666077.2 lcl|GPHN_4:8-2326_ORF1_GPHN_4:7:2325, XP_006515962.1, XP_006515963.1, XP_006515964.1, XP_006515965.1, XP_006515966.1, XP_006515967.1, XP_006515968.1 lcl|GPHN_38:8-2365_ORF1_GPHN_38:7:2364, XP_006515969.1 lcl|GPHN_3:8-2257_ORF1_GPHN_3:7:2256, XP_006515970.1 lcl|GPHN_1:8-2218_ORF1_GPHN_1:7:2217, XP_017170562.1, XP_017170563.1, XP_017170564.1, XP_017170565.1 lcl|GPHN_29:8-2323_ORF1_GPHN_…
ELIRESDDGTEELEV	ELIRESDDGTEELEV		35.6	1732.8	2.5	867.41	26.93	NP_666077.2 lcl|GPHN_4:8-2326_ORF1_GPHN_4:7:2325, XP_006515962.1, XP_006515963.1, XP_006515964.1, XP_006515965.1, XP_006515966.1, XP_006515967.1, XP_006515968.1 lcl|GPHN_38:8-2365_ORF1_GPHN_38:7:2364, XP_006515969.1 lcl|GPHN_3:8-2257_ORF1_GPHN_3:7:2256, XP_006515970.1 lcl|GPHN_1:8-2218_ORF1_GPHN_1:7:2217, XP_017170562.1, XP_017170563.1, XP_017170564.1, XP_017170565.1 lcl|GPHN_29:8-2323_ORF1_GPHN_…
ELLNPEDDLLPGK	ELLNPEDDLLPGK		37.37	1451.75	1.1	726.883	29.22	NP_666077.2 lcl|GPHN_4:8-2326_ORF1_GPHN_4:7:2325, XP_006515962.1, XP_006515963.1, XP_006515964.1, XP_006515965.1, XP_006515966.1, XP_006515967.1, XP_006515968.1 lcl|GPHN_38:8-2365_ORF1_GPHN_38:7:2364, XP_006515969.1 lcl|GPHN_3:8-2257_ORF1_GPHN_3:7:2256, XP_006515970.1 lcl|GPHN_1:8-2218_ORF1_GPHN_1:7:2217, XP_017170562.1, XP_017170563.1, XP_017170564.1, XP_017170565.1 lcl|GPHN_29:8-2323_ORF1_GPHN_…
ELNLILTTGGTGFAPR	ELNLILTTGGTGFAPR		45.37	1658.9	1.9	553.975	32.19	NP_666077.2 lcl|GPHN_4:8-2326_ORF1_GPHN_4:7:2325, XP_006515962.1, XP_006515963.1, XP_006515964.1, XP_006515965.1, XP_006515966.1, XP_006515967.1, XP_006515968.1 lcl|GPHN_38:8-2365_ORF1_GPHN_38:7:2364, XP_006515969.1 lcl|GPHN_3:8-2257_ORF1_GPHN_3:7:2256, XP_006515970.1 lcl|GPHN_1:8-2218_ORF1_GPHN_1:7:2217, XP_017170562.1, XP_017170563.1, XP_017170564.1, XP_017170565.1 lcl|GPHN_29:8-2323_ORF1_GPHN_…
EMTPVLGTEII	EM(+15.99)TPVLGTEII	M2:Oxidation (M):1000.00	24.55	1217.62	0.4	609.818	33.07	NP_666077.2 lcl|GPHN_4:8-2326_ORF1_GPHN_4:7:2325, XP_006515962.1, XP_006515963.1, XP_006515964.1, XP_006515965.1, XP_006515966.1, XP_006515967.1, XP_006515968.1 lcl|GPHN_38:8-2365_ORF1_GPHN_38:7:2364, XP_006515969.1 lcl|GPHN_3:8-2257_ORF1_GPHN_3:7:2256, XP_006515970.1 lcl|GPHN_1:8-2218_ORF1_GPHN_1:7:2217, XP_017170562.1, XP_017170563.1, XP_017170564.1, XP_017170565.1 lcl|GPHN_29:8-2323_ORF1_GPHN_…
EMTPVLGTEII	E(+42.01)MTPVLGTEII	E1:Acetylation (Protein N-term):1000.00	23.03	1243.64	-0.5	622.825	37.78	NP_666077.2 lcl|GPHN_4:8-2326_ORF1_GPHN_4:7:2325, XP_006515962.1, XP_006515963.1, XP_006515964.1, XP_006515965.1, XP_006515966.1, XP_006515967.1, XP_006515968.1 lcl|GPHN_38:8-2365_ORF1_GPHN_38:7:2364, XP_006515969.1 lcl|GPHN_3:8-2257_ORF1_GPHN_3:7:2256, XP_006515970.1 lcl|GPHN_1:8-2218_ORF1_GPHN_1:7:2217, XP_017170562.1, XP_017170563.1, XP_017170564.1, XP_017170565.1 lcl|GPHN_29:8-2323_ORF1_GPHN_…
EMTPVLGTEIINYR	EMTPVLGTEIINYR		46.16	1634.83	-0.1	818.424	29.98	NP_666077.2 lcl|GPHN_4:8-2326_ORF1_GPHN_4:7:2325, XP_006515962.1, XP_006515963.1, XP_006515964.1, XP_006515965.1, XP_006515966.1, XP_006515967.1, XP_006515968.1 lcl|GPHN_38:8-2365_ORF1_GPHN_38:7:2364, XP_006515969.1 lcl|GPHN_3:8-2257_ORF1_GPHN_3:7:2256, XP_006515970.1 lcl|GPHN_1:8-2218_ORF1_GPHN_1:7:2217, XP_017170562.1, XP_017170563.1, XP_017170564.1, XP_017170565.1 lcl|GPHN_29:8-2323_ORF1_GPHN_…
EMTPVLGTEIINYR	E(+42.01)M(+15.99)TPVLGTEIINYR	E1:Acetylation (Protein N-term):1000.00;M2:Oxidation (M):1000.00	45.05	1692.84	1.5	847.428	31.7	NP_666077.2 lcl|GPHN_4:8-2326_ORF1_GPHN_4:7:2325, XP_006515962.1, XP_006515963.1, XP_006515964.1, XP_006515965.1, XP_006515966.1, XP_006515967.1, XP_006515968.1 lcl|GPHN_38:8-2365_ORF1_GPHN_38:7:2364, XP_006515969.1 lcl|GPHN_3:8-2257_ORF1_GPHN_3:7:2256, XP_006515970.1 lcl|GPHN_1:8-2218_ORF1_GPHN_1:7:2217, XP_017170562.1, XP_017170563.1, XP_017170564.1, XP_017170565.1 lcl|GPHN_29:8-2323_ORF1_GPHN_…
EMTPVLGTEIINYR	EM(+15.99)TPVLGTEIINYR	M2:Oxidation (M):1000.00	42.13	1650.83	3.5	826.425	28.39	NP_666077.2 lcl|GPHN_4:8-2326_ORF1_GPHN_4:7:2325, XP_006515962.1, XP_006515963.1, XP_006515964.1, XP_006515965.1, XP_006515966.1, XP_006515967.1, XP_006515968.1 lcl|GPHN_38:8-2365_ORF1_GPHN_38:7:2364, XP_006515969.1 lcl|GPHN_3:8-2257_ORF1_GPHN_3:7:2256, XP_006515970.1 lcl|GPHN_1:8-2218_ORF1_GPHN_1:7:2217, XP_017170562.1, XP_017170563.1, XP_017170564.1, XP_017170565.1 lcl|GPHN_29:8-2323_ORF1_GPHN_…
EMTPVLGTEIINYR	E(+42.01)MTPVLGTEIINYR	E1:Acetylation (Protein N-term):1000.00	36.81	1676.84	2.9	839.432	34.26	NP_666077.2 lcl|GPHN_4:8-2326_ORF1_GPHN_4:7:2325, XP_006515962.1, XP_006515963.1, XP_006515964.1, XP_006515965.1, XP_006515966.1, XP_006515967.1, XP_006515968.1 lcl|GPHN_38:8-2365_ORF1_GPHN_38:7:2364, XP_006515969.1 lcl|GPHN_3:8-2257_ORF1_GPHN_3:7:2256, XP_006515970.1 lcl|GPHN_1:8-2218_ORF1_GPHN_1:7:2217, XP_017170562.1, XP_017170563.1, XP_017170564.1, XP_017170565.1 lcl|GPHN_29:8-2323_ORF1_GPHN_…
EPLPWAQ	EPLPWAQ		25.52	839.418	0.6	420.716	30.28	NP_666077.2 lcl|GPHN_4:8-2326_ORF1_GPHN_4:7:2325, XP_006515962.1, XP_006515963.1, XP_006515964.1, XP_006515965.1, XP_006515966.1, XP_006515967.1, XP_006515968.1 lcl|GPHN_38:8-2365_ORF1_GPHN_38:7:2364, XP_006515969.1 lcl|GPHN_3:8-2257_ORF1_GPHN_3:7:2256, XP_006515970.1 lcl|GPHN_1:8-2218_ORF1_GPHN_1:7:2217, XP_017170562.1, XP_017170563.1, XP_017170564.1, XP_017170565.1 lcl|GPHN_29:8-2323_ORF1_GPHN_…
EQYVELH	EQYVELH		21.54	916.429	-0.6	459.221	20.56	NP_666077.2 lcl|GPHN_4:8-2326_ORF1_GPHN_4:7:2325, XP_006515962.1, XP_006515963.1, XP_006515964.1, XP_006515965.1, XP_006515966.1, XP_006515967.1, XP_006515968.1 lcl|GPHN_38:8-2365_ORF1_GPHN_38:7:2364, XP_006515969.1 lcl|GPHN_3:8-2257_ORF1_GPHN_3:7:2256, XP_006515970.1 lcl|GPHN_1:8-2218_ORF1_GPHN_1:7:2217, XP_017170562.1, XP_017170563.1, XP_017170564.1, XP_017170565.1 lcl|GPHN_29:8-2323_ORF1_GPHN_…
EQYVELHKG	EQYVELHKG		21.27	1101.55	0.2	368.189	16.38	NP_666077.2 lcl|GPHN_4:8-2326_ORF1_GPHN_4:7:2325, XP_006515962.1, XP_006515963.1, XP_006515964.1, XP_006515965.1, XP_006515966.1, XP_006515967.1, XP_006515968.1 lcl|GPHN_38:8-2365_ORF1_GPHN_38:7:2364, XP_006515969.1 lcl|GPHN_3:8-2257_ORF1_GPHN_3:7:2256, XP_006515970.1 lcl|GPHN_1:8-2218_ORF1_GPHN_1:7:2217, XP_017170562.1, XP_017170563.1, XP_017170564.1, XP_017170565.1 lcl|GPHN_29:8-2323_ORF1_GPHN_…
EQYVELHKGEVV	EQYVELHKGEVV		36.75	1428.72	2.5	715.371	20.81	NP_666077.2 lcl|GPHN_4:8-2326_ORF1_GPHN_4:7:2325, XP_006515962.1, XP_006515963.1, XP_006515964.1, XP_006515965.1, XP_006515966.1, XP_006515967.1, XP_006515968.1 lcl|GPHN_38:8-2365_ORF1_GPHN_38:7:2364, XP_006515969.1 lcl|GPHN_3:8-2257_ORF1_GPHN_3:7:2256, XP_006515970.1 lcl|GPHN_1:8-2218_ORF1_GPHN_1:7:2217, XP_017170562.1, XP_017170563.1, XP_017170564.1, XP_017170565.1 lcl|GPHN_29:8-2323_ORF1_GPHN_…
EQYVELHKGEVVDV	EQYVELHKGEVVDV		38.56	1642.82	2.2	822.419	22.96	NP_666077.2 lcl|GPHN_4:8-2326_ORF1_GPHN_4:7:2325, XP_006515962.1, XP_006515963.1, XP_006515964.1, XP_006515965.1, XP_006515966.1, XP_006515967.1, XP_006515968.1 lcl|GPHN_38:8-2365_ORF1_GPHN_38:7:2364, XP_006515969.1 lcl|GPHN_3:8-2257_ORF1_GPHN_3:7:2256, XP_006515970.1 lcl|GPHN_1:8-2218_ORF1_GPHN_1:7:2217, XP_017170562.1, XP_017170563.1, XP_017170564.1, XP_017170565.1 lcl|GPHN_29:8-2323_ORF1_GPHN_…
ESDDGTEELEVR	ESDDGTEELEVR		42.56	1377.59	0.3	689.802	22	NP_666077.2 lcl|GPHN_4:8-2326_ORF1_GPHN_4:7:2325, XP_006515962.1, XP_006515963.1, XP_006515964.1, XP_006515965.1, XP_006515966.1, XP_006515967.1, XP_006515968.1 lcl|GPHN_38:8-2365_ORF1_GPHN_38:7:2364, XP_006515969.1 lcl|GPHN_3:8-2257_ORF1_GPHN_3:7:2256, XP_006515970.1 lcl|GPHN_1:8-2218_ORF1_GPHN_1:7:2217, XP_017170562.1, XP_017170563.1, XP_017170564.1, XP_017170565.1 lcl|GPHN_29:8-2323_ORF1_GPHN_…
ESDDGTEELEVRI	ESDDGTEELEVRI		38.21	1490.67	3.7	746.347	27.61	NP_666077.2 lcl|GPHN_4:8-2326_ORF1_GPHN_4:7:2325, XP_006515962.1, XP_006515963.1, XP_006515964.1, XP_006515965.1, XP_006515966.1, XP_006515967.1, XP_006515968.1 lcl|GPHN_38:8-2365_ORF1_GPHN_38:7:2364, XP_006515969.1 lcl|GPHN_3:8-2257_ORF1_GPHN_3:7:2256, XP_006515970.1 lcl|GPHN_1:8-2218_ORF1_GPHN_1:7:2217, XP_017170562.1, XP_017170563.1, XP_017170564.1, XP_017170565.1 lcl|GPHN_29:8-2323_ORF1_GPHN_…
ESDDGTEELEVRIL	ESDDGTEELEVRIL		41	1603.76	0.3	802.886	30.71	NP_666077.2 lcl|GPHN_4:8-2326_ORF1_GPHN_4:7:2325, XP_006515962.1, XP_006515963.1, XP_006515964.1, XP_006515965.1, XP_006515966.1, XP_006515967.1, XP_006515968.1 lcl|GPHN_38:8-2365_ORF1_GPHN_38:7:2364, XP_006515969.1 lcl|GPHN_3:8-2257_ORF1_GPHN_3:7:2256, XP_006515970.1 lcl|GPHN_1:8-2218_ORF1_GPHN_1:7:2217, XP_017170562.1, XP_017170563.1, XP_017170564.1, XP_017170565.1 lcl|GPHN_29:8-2323_ORF1_GPHN_…
ESDDGTEELEVRILVQ	ESDDGTEELEVRILVQ		29.14	1830.88	-0.7	611.302	31.52	NP_666077.2 lcl|GPHN_4:8-2326_ORF1_GPHN_4:7:2325, XP_006515962.1, XP_006515963.1, XP_006515964.1, XP_006515965.1, XP_006515966.1, XP_006515967.1, XP_006515968.1 lcl|GPHN_38:8-2365_ORF1_GPHN_38:7:2364, XP_006515969.1 lcl|GPHN_3:8-2257_ORF1_GPHN_3:7:2256, XP_006515970.1 lcl|GPHN_1:8-2218_ORF1_GPHN_1:7:2217, XP_017170562.1, XP_017170563.1, XP_017170564.1, XP_017170565.1 lcl|GPHN_29:8-2323_ORF1_GPHN_…
ESPRAQAT	ESPRAQAT		19.87	858.419	-0.2	430.217	11.12	NP_666077.2 lcl|GPHN_4:8-2326_ORF1_GPHN_4:7:2325, XP_006515962.1, XP_006515963.1, XP_006515964.1, XP_006515965.1, XP_006515966.1, XP_006515967.1, XP_006515968.1 lcl|GPHN_38:8-2365_ORF1_GPHN_38:7:2364, XP_006515969.1 lcl|GPHN_3:8-2257_ORF1_GPHN_3:7:2256, XP_006515970.1 lcl|GPHN_1:8-2218_ORF1_GPHN_1:7:2217, XP_017170562.1, XP_017170563.1, XP_017170564.1, XP_017170565.1 lcl|GPHN_29:8-2323_ORF1_GPHN_…
ESPRAQATSRLSTA	ESPRAQATSRLSTA		24.37	1473.75	-1.2	492.258	15.5	NP_666077.2 lcl|GPHN_4:8-2326_ORF1_GPHN_4:7:2325, XP_006515962.1, XP_006515963.1, XP_006515964.1, XP_006515965.1, XP_006515966.1, XP_006515967.1, XP_006515968.1 lcl|GPHN_38:8-2365_ORF1_GPHN_38:7:2364, XP_006515969.1 lcl|GPHN_3:8-2257_ORF1_GPHN_3:7:2256, XP_006515970.1 lcl|GPHN_1:8-2218_ORF1_GPHN_1:7:2217, XP_017170562.1, XP_017170563.1, XP_017170564.1, XP_017170565.1 lcl|GPHN_29:8-2323_ORF1_GPHN_…
ESQAGEQPTQTVMPGQVMR	ESQAGEQPTQTVM(+15.99)PGQVM(+15.99)R	M13:Oxidation (M):1000.00;M18:Oxidation (M):1000.00	23.25	2104.95	0.5	702.658	18.68	NP_666077.2 lcl|GPHN_4:8-2326_ORF1_GPHN_4:7:2325, XP_006515962.1, XP_006515963.1, XP_006515964.1, XP_006515965.1, XP_006515966.1, XP_006515967.1, XP_006515968.1 lcl|GPHN_38:8-2365_ORF1_GPHN_38:7:2364, XP_006515969.1 lcl|GPHN_3:8-2257_ORF1_GPHN_3:7:2256, XP_006515970.1 lcl|GPHN_1:8-2218_ORF1_GPHN_1:7:2217, XP_017170562.1, XP_017170563.1, XP_017170564.1, XP_017170565.1 lcl|GPHN_29:8-2323_ORF1_GPHN_…
ETLIDWCDEK	ETLIDWC(+57.02)DEK	C7:Carbamidomethylation:1000.00	32.12	1307.57	0.4	654.793	27.11	NP_666077.2 lcl|GPHN_4:8-2326_ORF1_GPHN_4:7:2325, XP_006515962.1, XP_006515963.1, XP_006515964.1, XP_006515965.1, XP_006515966.1, XP_006515967.1, XP_006515968.1 lcl|GPHN_38:8-2365_ORF1_GPHN_38:7:2364, XP_006515969.1 lcl|GPHN_3:8-2257_ORF1_GPHN_3:7:2256, XP_006515970.1 lcl|GPHN_1:8-2218_ORF1_GPHN_1:7:2217, XP_017170562.1, XP_017170563.1, XP_017170564.1, XP_017170565.1 lcl|GPHN_29:8-2323_ORF1_GPHN_…
ETLIDWCDEKE	ETLIDWC(+57.02)DEKE	C7:Carbamidomethylation:1000.00	36.29	1436.61	-1.4	719.313	27.37	NP_666077.2 lcl|GPHN_4:8-2326_ORF1_GPHN_4:7:2325, XP_006515962.1, XP_006515963.1, XP_006515964.1, XP_006515965.1, XP_006515966.1, XP_006515967.1, XP_006515968.1 lcl|GPHN_38:8-2365_ORF1_GPHN_38:7:2364, XP_006515969.1 lcl|GPHN_3:8-2257_ORF1_GPHN_3:7:2256, XP_006515970.1 lcl|GPHN_1:8-2218_ORF1_GPHN_1:7:2217, XP_017170562.1, XP_017170563.1, XP_017170564.1, XP_017170565.1 lcl|GPHN_29:8-2323_ORF1_GPHN_…
ETLIDWCDEKELN	ETLIDWC(+57.02)DEKELN	C7:Carbamidomethylation:1000.00	28.94	1663.74	6.3	832.882	28.9	NP_666077.2 lcl|GPHN_4:8-2326_ORF1_GPHN_4:7:2325, XP_006515962.1, XP_006515963.1, XP_006515964.1, XP_006515965.1, XP_006515966.1, XP_006515967.1, XP_006515968.1 lcl|GPHN_38:8-2365_ORF1_GPHN_38:7:2364, XP_006515969.1 lcl|GPHN_3:8-2257_ORF1_GPHN_3:7:2256, XP_006515970.1 lcl|GPHN_1:8-2218_ORF1_GPHN_1:7:2217, XP_017170562.1, XP_017170563.1, XP_017170564.1, XP_017170565.1 lcl|GPHN_29:8-2323_ORF1_GPHN_…
ETLIDWCDEKELNLILTTGGTGFAPR	ETLIDWC(+57.02)DEKELNLILTTGGTGFAPR	C7:Carbamidomethylation:1000.00	46.37	2948.46	-0.7	983.826	35.5	NP_666077.2 lcl|GPHN_4:8-2326_ORF1_GPHN_4:7:2325, XP_006515962.1, XP_006515963.1, XP_006515964.1, XP_006515965.1, XP_006515966.1, XP_006515967.1, XP_006515968.1 lcl|GPHN_38:8-2365_ORF1_GPHN_38:7:2364, XP_006515969.1 lcl|GPHN_3:8-2257_ORF1_GPHN_3:7:2256, XP_006515970.1 lcl|GPHN_1:8-2218_ORF1_GPHN_1:7:2217, XP_017170562.1, XP_017170563.1, XP_017170564.1, XP_017170565.1 lcl|GPHN_29:8-2323_ORF1_GPHN_…
EVEVNKFPVVAV	EVEVNKFPVVAV		40.53	1328.73	0.7	665.375	28.76	NP_666077.2 lcl|GPHN_4:8-2326_ORF1_GPHN_4:7:2325, XP_006515962.1, XP_006515963.1, XP_006515964.1, XP_006515965.1, XP_006515966.1, XP_006515967.1, XP_006515968.1 lcl|GPHN_38:8-2365_ORF1_GPHN_38:7:2364, XP_006515969.1 lcl|GPHN_3:8-2257_ORF1_GPHN_3:7:2256, XP_006515970.1 lcl|GPHN_1:8-2218_ORF1_GPHN_1:7:2217, XP_017170562.1, XP_017170563.1, XP_017170564.1, XP_017170565.1 lcl|GPHN_29:8-2323_ORF1_GPHN_…
EVEVNKFPVVAVM	EVEVNKFPVVAVM(+15.99)	M13:Oxidation (M):1000.00	44.21	1475.77	2.3	738.894	27.83	NP_666077.2 lcl|GPHN_4:8-2326_ORF1_GPHN_4:7:2325, XP_006515962.1, XP_006515963.1, XP_006515964.1, XP_006515965.1, XP_006515966.1, XP_006515967.1, XP_006515968.1 lcl|GPHN_38:8-2365_ORF1_GPHN_38:7:2364, XP_006515969.1 lcl|GPHN_3:8-2257_ORF1_GPHN_3:7:2256, XP_006515970.1 lcl|GPHN_1:8-2218_ORF1_GPHN_1:7:2217, XP_017170562.1, XP_017170563.1, XP_017170564.1, XP_017170565.1 lcl|GPHN_29:8-2323_ORF1_GPHN_…
EVEVNKFPVVAVMSTGNELLNPEDDLLPGK	EVEVNKFPVVAVM(+15.99)STGNELLNPEDDLLPGK	M13:Oxidation (M):1000.00	55.98	3268.65	0.8	818.171	32.5	NP_666077.2 lcl|GPHN_4:8-2326_ORF1_GPHN_4:7:2325, XP_006515962.1, XP_006515963.1, XP_006515964.1, XP_006515965.1, XP_006515966.1, XP_006515967.1, XP_006515968.1 lcl|GPHN_38:8-2365_ORF1_GPHN_38:7:2364, XP_006515969.1 lcl|GPHN_3:8-2257_ORF1_GPHN_3:7:2256, XP_006515970.1 lcl|GPHN_1:8-2218_ORF1_GPHN_1:7:2217, XP_017170562.1, XP_017170563.1, XP_017170564.1, XP_017170565.1 lcl|GPHN_29:8-2323_ORF1_GPHN_…
EVEVNKFPVVAVMSTGNELLNPEDDLLPGK	EVEVNKFPVVAVMSTGNELLNPEDDLLPGK		48.77	3252.66	3.9	814.175	35.24	NP_666077.2 lcl|GPHN_4:8-2326_ORF1_GPHN_4:7:2325, XP_006515962.1, XP_006515963.1, XP_006515964.1, XP_006515965.1, XP_006515966.1, XP_006515967.1, XP_006515968.1 lcl|GPHN_38:8-2365_ORF1_GPHN_38:7:2364, XP_006515969.1 lcl|GPHN_3:8-2257_ORF1_GPHN_3:7:2256, XP_006515970.1 lcl|GPHN_1:8-2218_ORF1_GPHN_1:7:2217, XP_017170562.1, XP_017170563.1, XP_017170564.1, XP_017170565.1 lcl|GPHN_29:8-2323_ORF1_GPHN_…
EVHDELEDLPSPPPP	EVHDELEDLPS(+79.97)PPPP	S11:Phosphorylation (STY):1000.00	37.77	1749.75	0.1	875.882	29.72	NP_666077.2 lcl|GPHN_4:8-2326_ORF1_GPHN_4:7:2325, XP_006515962.1, XP_006515963.1, XP_006515964.1, XP_006515965.1, XP_006515966.1, XP_006515967.1, XP_006515968.1 lcl|GPHN_38:8-2365_ORF1_GPHN_38:7:2364, XP_006515969.1 lcl|GPHN_3:8-2257_ORF1_GPHN_3:7:2256, XP_006515970.1 lcl|GPHN_1:8-2218_ORF1_GPHN_1:7:2217, XP_017170562.1, XP_017170563.1, XP_017170564.1, XP_017170565.1 lcl|GPHN_29:8-2323_ORF1_GPHN_…
EVHDELEDLPSPPPPL	EVHDELEDLPS(+79.97)PPPPL	S11:Phosphorylation (STY):1000.00	44.68	1862.83	0.6	932.425	34.93	NP_666077.2 lcl|GPHN_4:8-2326_ORF1_GPHN_4:7:2325, XP_006515962.1, XP_006515963.1, XP_006515964.1, XP_006515965.1, XP_006515966.1, XP_006515967.1, XP_006515968.1 lcl|GPHN_38:8-2365_ORF1_GPHN_38:7:2364, XP_006515969.1 lcl|GPHN_3:8-2257_ORF1_GPHN_3:7:2256, XP_006515970.1 lcl|GPHN_1:8-2218_ORF1_GPHN_1:7:2217, XP_017170562.1, XP_017170563.1, XP_017170564.1, XP_017170565.1 lcl|GPHN_29:8-2323_ORF1_GPHN_…
EVHDELEDLPSPPPPL	EVHDELEDLPSPPPPL		42.17	1782.87	-0.2	892.441	31.75	NP_666077.2 lcl|GPHN_4:8-2326_ORF1_GPHN_4:7:2325, XP_006515962.1, XP_006515963.1, XP_006515964.1, XP_006515965.1, XP_006515966.1, XP_006515967.1, XP_006515968.1 lcl|GPHN_38:8-2365_ORF1_GPHN_38:7:2364, XP_006515969.1 lcl|GPHN_3:8-2257_ORF1_GPHN_3:7:2256, XP_006515970.1 lcl|GPHN_1:8-2218_ORF1_GPHN_1:7:2217, XP_017170562.1, XP_017170563.1, XP_017170564.1, XP_017170565.1 lcl|GPHN_29:8-2323_ORF1_GPHN_…
EVHDELEDLPSPPPPLS	EVHDELEDLPS(+79.97)PPPPLS	S11:Phosphorylation (STY):36.87	36.96	1949.87	-0.6	975.94	32.84	NP_666077.2 lcl|GPHN_4:8-2326_ORF1_GPHN_4:7:2325, XP_006515962.1, XP_006515963.1, XP_006515964.1, XP_006515965.1, XP_006515966.1, XP_006515967.1, XP_006515968.1 lcl|GPHN_38:8-2365_ORF1_GPHN_38:7:2364, XP_006515969.1 lcl|GPHN_3:8-2257_ORF1_GPHN_3:7:2256, XP_006515970.1 lcl|GPHN_1:8-2218_ORF1_GPHN_1:7:2217, XP_017170562.1, XP_017170563.1, XP_017170564.1, XP_017170565.1 lcl|GPHN_29:8-2323_ORF1_GPHN_…
EVHDELEDLPSPPPPLS	EVHDELEDLPSPPPPLS		34.88	1869.9	0.6	935.958	30.31	NP_666077.2 lcl|GPHN_4:8-2326_ORF1_GPHN_4:7:2325, XP_006515962.1, XP_006515963.1, XP_006515964.1, XP_006515965.1, XP_006515966.1, XP_006515967.1, XP_006515968.1 lcl|GPHN_38:8-2365_ORF1_GPHN_38:7:2364, XP_006515969.1 lcl|GPHN_3:8-2257_ORF1_GPHN_3:7:2256, XP_006515970.1 lcl|GPHN_1:8-2218_ORF1_GPHN_1:7:2217, XP_017170562.1, XP_017170563.1, XP_017170564.1, XP_017170565.1 lcl|GPHN_29:8-2323_ORF1_GPHN_…
EVHDELEDLPSPPPPLSPPPT	EVHDELEDLPS(+79.97)PPPPLS(+79.97)PPPT	S11:Phosphorylation (STY):43.70;S17:Phosphorylation (STY):42.68	57.66	2422.04	-0.1	1212.03	36.91	NP_666077.2 lcl|GPHN_4:8-2326_ORF1_GPHN_4:7:2325, XP_006515962.1, XP_006515963.1, XP_006515964.1, XP_006515965.1, XP_006515966.1, XP_006515967.1, XP_006515968.1 lcl|GPHN_38:8-2365_ORF1_GPHN_38:7:2364, XP_006515969.1 lcl|GPHN_3:8-2257_ORF1_GPHN_3:7:2256, XP_006515970.1 lcl|GPHN_1:8-2218_ORF1_GPHN_1:7:2217, XP_017170562.1, XP_017170563.1, XP_017170564.1, XP_017170565.1 lcl|GPHN_29:8-2323_ORF1_GPHN_…
EVHDELEDLPSPPPPLSPPPT	EVHDELEDLPSPPPPLS(+79.97)PPPT	S17:Phosphorylation (STY):5.14	56.16	2342.07	0.3	781.698	33.33	NP_666077.2 lcl|GPHN_4:8-2326_ORF1_GPHN_4:7:2325, XP_006515962.1, XP_006515963.1, XP_006515964.1, XP_006515965.1, XP_006515966.1, XP_006515967.1, XP_006515968.1 lcl|GPHN_38:8-2365_ORF1_GPHN_38:7:2364, XP_006515969.1 lcl|GPHN_3:8-2257_ORF1_GPHN_3:7:2256, XP_006515970.1 lcl|GPHN_1:8-2218_ORF1_GPHN_1:7:2217, XP_017170562.1, XP_017170563.1, XP_017170564.1, XP_017170565.1 lcl|GPHN_29:8-2323_ORF1_GPHN_…
EVHDELEDLPSPPPPLSPPPTT	EVHDELEDLPSPPPPLS(+79.97)PPPTT	S17:Phosphorylation (STY):0.00	64.13	2443.12	-0.4	1222.57	33.17	NP_666077.2 lcl|GPHN_4:8-2326_ORF1_GPHN_4:7:2325, XP_006515962.1, XP_006515963.1, XP_006515964.1, XP_006515965.1, XP_006515966.1, XP_006515967.1, XP_006515968.1 lcl|GPHN_38:8-2365_ORF1_GPHN_38:7:2364, XP_006515969.1 lcl|GPHN_3:8-2257_ORF1_GPHN_3:7:2256, XP_006515970.1 lcl|GPHN_1:8-2218_ORF1_GPHN_1:7:2217, XP_017170562.1, XP_017170563.1, XP_017170564.1, XP_017170565.1 lcl|GPHN_29:8-2323_ORF1_GPHN_…
EVHDELEDLPSPPPPLSPPPTT	EVHDELEDLPS(+79.97)PPPPLS(+79.97)PPPTT	S11:Phosphorylation (STY):29.98;S17:Phosphorylation (STY):42.68	61.02	2523.09	-0.3	1262.55	36.68	NP_666077.2 lcl|GPHN_4:8-2326_ORF1_GPHN_4:7:2325, XP_006515962.1, XP_006515963.1, XP_006515964.1, XP_006515965.1, XP_006515966.1, XP_006515967.1, XP_006515968.1 lcl|GPHN_38:8-2365_ORF1_GPHN_38:7:2364, XP_006515969.1 lcl|GPHN_3:8-2257_ORF1_GPHN_3:7:2256, XP_006515970.1 lcl|GPHN_1:8-2218_ORF1_GPHN_1:7:2217, XP_017170562.1, XP_017170563.1, XP_017170564.1, XP_017170565.1 lcl|GPHN_29:8-2323_ORF1_GPHN_…
EVHDELEDLPSPPPPLSPPPTT	EVHDELEDLPS(+79.97)PPPPLSPPPTT	S11:Phosphorylation (STY):0.00	19.88	2443.12	0.9	815.381	33.17	NP_666077.2 lcl|GPHN_4:8-2326_ORF1_GPHN_4:7:2325, XP_006515962.1, XP_006515963.1, XP_006515964.1, XP_006515965.1, XP_006515966.1, XP_006515967.1, XP_006515968.1 lcl|GPHN_38:8-2365_ORF1_GPHN_38:7:2364, XP_006515969.1 lcl|GPHN_3:8-2257_ORF1_GPHN_3:7:2256, XP_006515970.1 lcl|GPHN_1:8-2218_ORF1_GPHN_1:7:2217, XP_017170562.1, XP_017170563.1, XP_017170564.1, XP_017170565.1 lcl|GPHN_29:8-2323_ORF1_GPHN_…
EVHDELEDLPSPPPPLSPPPTTSPHK	EVHDELEDLPSPPPPLS(+79.97)PPPTTSPHK	S17:Phosphorylation (STY):9.45	74.73	2892.36	0.1	724.097	27.31	NP_666077.2 lcl|GPHN_4:8-2326_ORF1_GPHN_4:7:2325, XP_006515962.1, XP_006515963.1, XP_006515964.1, XP_006515965.1, XP_006515966.1, XP_006515967.1, XP_006515968.1 lcl|GPHN_38:8-2365_ORF1_GPHN_38:7:2364, XP_006515969.1 lcl|GPHN_3:8-2257_ORF1_GPHN_3:7:2256, XP_006515970.1 lcl|GPHN_1:8-2218_ORF1_GPHN_1:7:2217, XP_017170562.1, XP_017170563.1, XP_017170564.1, XP_017170565.1 lcl|GPHN_29:8-2323_ORF1_GPHN_…
EVHDELEDLPSPPPPLSPPPTTSPHK	EVHDELEDLPS(+79.97)PPPPLS(+79.97)PPPTTSPHK	S11:Phosphorylation (STY):44.14;S17:Phosphorylation (STY):42.68	73.59	2972.32	0.6	744.089	28.45	NP_666077.2 lcl|GPHN_4:8-2326_ORF1_GPHN_4:7:2325, XP_006515962.1, XP_006515963.1, XP_006515964.1, XP_006515965.1, XP_006515966.1, XP_006515967.1, XP_006515968.1 lcl|GPHN_38:8-2365_ORF1_GPHN_38:7:2364, XP_006515969.1 lcl|GPHN_3:8-2257_ORF1_GPHN_3:7:2256, XP_006515970.1 lcl|GPHN_1:8-2218_ORF1_GPHN_1:7:2217, XP_017170562.1, XP_017170563.1, XP_017170564.1, XP_017170565.1 lcl|GPHN_29:8-2323_ORF1_GPHN_…
EVHDELEDLPSPPPPLSPPPTTSPHK	EVHDELEDLPS(+79.97)PPPPLS(+79.97)PPPTTS(+79.97)PHK	S11:Phosphorylation (STY):21.51;S17:Phosphorylation (STY):33.81;S23:Phosphorylation (STY):8.22	62.78	3052.29	0.1	1018.44	30.83	NP_666077.2 lcl|GPHN_4:8-2326_ORF1_GPHN_4:7:2325, XP_006515962.1, XP_006515963.1, XP_006515964.1, XP_006515965.1, XP_006515966.1, XP_006515967.1, XP_006515968.1 lcl|GPHN_38:8-2365_ORF1_GPHN_38:7:2364, XP_006515969.1 lcl|GPHN_3:8-2257_ORF1_GPHN_3:7:2256, XP_006515970.1 lcl|GPHN_1:8-2218_ORF1_GPHN_1:7:2217, XP_017170562.1, XP_017170563.1, XP_017170564.1, XP_017170565.1 lcl|GPHN_29:8-2323_ORF1_GPHN_…
EVHDELEDLPSPPPPLSPPPTTSPHK	EVHDELEDLPSPPPPLSPPPTTSPHK		54.45	2812.39	0.7	938.472	26.13	NP_666077.2 lcl|GPHN_4:8-2326_ORF1_GPHN_4:7:2325, XP_006515962.1, XP_006515963.1, XP_006515964.1, XP_006515965.1, XP_006515966.1, XP_006515967.1, XP_006515968.1 lcl|GPHN_38:8-2365_ORF1_GPHN_38:7:2364, XP_006515969.1 lcl|GPHN_3:8-2257_ORF1_GPHN_3:7:2256, XP_006515970.1 lcl|GPHN_1:8-2218_ORF1_GPHN_1:7:2217, XP_017170562.1, XP_017170563.1, XP_017170564.1, XP_017170565.1 lcl|GPHN_29:8-2323_ORF1_GPHN_…
EVHDELEDLPSPPPPLSPPPTTSPHK	EVHDELEDLPS(+79.97)PPPPLS(+79.97)PPPT(+79.97)TSPHK	S11:Phosphorylation (STY):4.45;S17:Phosphorylation (STY):7.38;T21:Phosphorylation (STY):0.00	51.81	3052.29	0.9	1018.44	30.88	NP_666077.2 lcl|GPHN_4:8-2326_ORF1_GPHN_4:7:2325, XP_006515962.1, XP_006515963.1, XP_006515964.1, XP_006515965.1, XP_006515966.1, XP_006515967.1, XP_006515968.1 lcl|GPHN_38:8-2365_ORF1_GPHN_38:7:2364, XP_006515969.1 lcl|GPHN_3:8-2257_ORF1_GPHN_3:7:2256, XP_006515970.1 lcl|GPHN_1:8-2218_ORF1_GPHN_1:7:2217, XP_017170562.1, XP_017170563.1, XP_017170564.1, XP_017170565.1 lcl|GPHN_29:8-2323_ORF1_GPHN_…
EVHDELEDLPSPPPPLSPPPTTSPHK	E(+42.01)VHDELEDLPS(+79.97)PPPPLS(+79.97)PPPTTSPHK	E1:Acetylation (Protein N-term):1000.00;S11:Phosphorylation (STY):21.51;S17:Phosphorylation (STY):25.70	39.43	3014.34	2.5	1005.79	30.41	NP_666077.2 lcl|GPHN_4:8-2326_ORF1_GPHN_4:7:2325, XP_006515962.1, XP_006515963.1, XP_006515964.1, XP_006515965.1, XP_006515966.1, XP_006515967.1, XP_006515968.1 lcl|GPHN_38:8-2365_ORF1_GPHN_38:7:2364, XP_006515969.1 lcl|GPHN_3:8-2257_ORF1_GPHN_3:7:2256, XP_006515970.1 lcl|GPHN_1:8-2218_ORF1_GPHN_1:7:2217, XP_017170562.1, XP_017170563.1, XP_017170564.1, XP_017170565.1 lcl|GPHN_29:8-2323_ORF1_GPHN_…
EVHDELEDLPSPPPPLSPPPTTSPHK	EVHDELEDLPS(+79.97)PPPPLSPPPTTSPHK	S11:Phosphorylation (STY):0.00	37.48	2892.36	-1.4	724.096	27.69	NP_666077.2 lcl|GPHN_4:8-2326_ORF1_GPHN_4:7:2325, XP_006515962.1, XP_006515963.1, XP_006515964.1, XP_006515965.1, XP_006515966.1, XP_006515967.1, XP_006515968.1 lcl|GPHN_38:8-2365_ORF1_GPHN_38:7:2364, XP_006515969.1 lcl|GPHN_3:8-2257_ORF1_GPHN_3:7:2256, XP_006515970.1 lcl|GPHN_1:8-2218_ORF1_GPHN_1:7:2217, XP_017170562.1, XP_017170563.1, XP_017170564.1, XP_017170565.1 lcl|GPHN_29:8-2323_ORF1_GPHN_…
EVHDELEDLPSPPPPLSPPPTTSPHK	EVHDELEDLPSPPPPLS(+79.97)PPPT(+79.97)TS(+79.97)PHK	S17:Phosphorylation (STY):0.00;T21:Phosphorylation (STY):0.00;S23:Phosphorylation (STY):0.00	36.31	3052.29	-0.2	1018.44	34.57	NP_666077.2 lcl|GPHN_4:8-2326_ORF1_GPHN_4:7:2325, XP_006515962.1, XP_006515963.1, XP_006515964.1, XP_006515965.1, XP_006515966.1, XP_006515967.1, XP_006515968.1 lcl|GPHN_38:8-2365_ORF1_GPHN_38:7:2364, XP_006515969.1 lcl|GPHN_3:8-2257_ORF1_GPHN_3:7:2256, XP_006515970.1 lcl|GPHN_1:8-2218_ORF1_GPHN_1:7:2217, XP_017170562.1, XP_017170563.1, XP_017170564.1, XP_017170565.1 lcl|GPHN_29:8-2323_ORF1_GPHN_…
EVHDELEDLPSPPPPLSPPPTTSPHK	EVHDELEDLPSPPPPLS(+79.97)PPPT(+79.97)T(+79.97)SPHK	S17:Phosphorylation (STY):0.00;T21:Phosphorylation (STY):0.00;T22:Phosphorylation (STY):0.00	27.26	3052.29	-0.9	1018.44	33.16	NP_666077.2 lcl|GPHN_4:8-2326_ORF1_GPHN_4:7:2325, XP_006515962.1, XP_006515963.1, XP_006515964.1, XP_006515965.1, XP_006515966.1, XP_006515967.1, XP_006515968.1 lcl|GPHN_38:8-2365_ORF1_GPHN_38:7:2364, XP_006515969.1 lcl|GPHN_3:8-2257_ORF1_GPHN_3:7:2256, XP_006515970.1 lcl|GPHN_1:8-2218_ORF1_GPHN_1:7:2217, XP_017170562.1, XP_017170563.1, XP_017170564.1, XP_017170565.1 lcl|GPHN_29:8-2323_ORF1_GPHN_…
EVHDELEDLPSPPPPLSPPPTTSPHKQTEDK	EVHDELEDLPS(+79.97)PPPPLS(+79.97)PPPT(+79.97)TSPHKQTEDK	S11:Phosphorylation (STY):8.53;S17:Phosphorylation (STY):14.62;T21:Phosphorylation (STY):0.00	63.59	3653.56	0.5	1218.86	27.87	NP_666077.2 lcl|GPHN_4:8-2326_ORF1_GPHN_4:7:2325, XP_006515962.1, XP_006515963.1, XP_006515964.1, XP_006515965.1, XP_006515966.1, XP_006515967.1, XP_006515968.1 lcl|GPHN_38:8-2365_ORF1_GPHN_38:7:2364, XP_006515969.1 lcl|GPHN_3:8-2257_ORF1_GPHN_3:7:2256, XP_006515970.1 lcl|GPHN_1:8-2218_ORF1_GPHN_1:7:2217, XP_017170562.1, XP_017170563.1, XP_017170564.1, XP_017170565.1 lcl|GPHN_29:8-2323_ORF1_GPHN_…
EVHDELEDLPSPPPPLSPPPTTSPHKQTEDK	EVHDELEDLPS(+79.97)PPPPLSPPPT(+79.97)TSPHKQTEDK	S11:Phosphorylation (STY):0.00;T21:Phosphorylation (STY):0.00	57.13	3573.6	0.9	1192.21	26.63	NP_666077.2 lcl|GPHN_4:8-2326_ORF1_GPHN_4:7:2325, XP_006515962.1, XP_006515963.1, XP_006515964.1, XP_006515965.1, XP_006515966.1, XP_006515967.1, XP_006515968.1 lcl|GPHN_38:8-2365_ORF1_GPHN_38:7:2364, XP_006515969.1 lcl|GPHN_3:8-2257_ORF1_GPHN_3:7:2256, XP_006515970.1 lcl|GPHN_1:8-2218_ORF1_GPHN_1:7:2217, XP_017170562.1, XP_017170563.1, XP_017170564.1, XP_017170565.1 lcl|GPHN_29:8-2323_ORF1_GPHN_…
EVHDELEDLPSPPPPLSPPPTTSPHKQTEDK	EVHDELEDLPSPPPPLS(+79.97)PPPTTS(+79.97)PHKQTEDK	S17:Phosphorylation (STY):11.12;S23:Phosphorylation (STY):0.00	55.06	3573.6	1.2	894.407	26.67	NP_666077.2 lcl|GPHN_4:8-2326_ORF1_GPHN_4:7:2325, XP_006515962.1, XP_006515963.1, XP_006515964.1, XP_006515965.1, XP_006515966.1, XP_006515967.1, XP_006515968.1 lcl|GPHN_38:8-2365_ORF1_GPHN_38:7:2364, XP_006515969.1 lcl|GPHN_3:8-2257_ORF1_GPHN_3:7:2256, XP_006515970.1 lcl|GPHN_1:8-2218_ORF1_GPHN_1:7:2217, XP_017170562.1, XP_017170563.1, XP_017170564.1, XP_017170565.1 lcl|GPHN_29:8-2323_ORF1_GPHN_…
EVHDELEDLPSPPPPLSPPPTTSPHKQTEDK	EVHDELEDLPSPPPPLS(+79.97)PPPT(+79.97)T(+79.97)SPHKQTEDK	S17:Phosphorylation (STY):0.00;T21:Phosphorylation (STY):0.00;T22:Phosphorylation (STY):0.00	54.4	3653.56	1.1	914.399	27.8	NP_666077.2 lcl|GPHN_4:8-2326_ORF1_GPHN_4:7:2325, XP_006515962.1, XP_006515963.1, XP_006515964.1, XP_006515965.1, XP_006515966.1, XP_006515967.1, XP_006515968.1 lcl|GPHN_38:8-2365_ORF1_GPHN_38:7:2364, XP_006515969.1 lcl|GPHN_3:8-2257_ORF1_GPHN_3:7:2256, XP_006515970.1 lcl|GPHN_1:8-2218_ORF1_GPHN_1:7:2217, XP_017170562.1, XP_017170563.1, XP_017170564.1, XP_017170565.1 lcl|GPHN_29:8-2323_ORF1_GPHN_…
EVHDELEDLPSPPPPLSPPPTTSPHKQTEDK	EVHDELEDLPS(+79.97)PPPPLSPPPTT(+79.97)S(+79.97)PHKQTEDK	S11:Phosphorylation (STY):0.00;T22:Phosphorylation (STY):0.00;S23:Phosphorylation (STY):0.00	40.36	3653.56	0.5	914.398	27.88	NP_666077.2 lcl|GPHN_4:8-2326_ORF1_GPHN_4:7:2325, XP_006515962.1, XP_006515963.1, XP_006515964.1, XP_006515965.1, XP_006515966.1, XP_006515967.1, XP_006515968.1 lcl|GPHN_38:8-2365_ORF1_GPHN_38:7:2364, XP_006515969.1 lcl|GPHN_3:8-2257_ORF1_GPHN_3:7:2256, XP_006515970.1 lcl|GPHN_1:8-2218_ORF1_GPHN_1:7:2217, XP_017170562.1, XP_017170563.1, XP_017170564.1, XP_017170565.1 lcl|GPHN_29:8-2323_ORF1_GPHN_…
EVIEREAPG	EVIEREAPG		31.46	998.503	-1.7	500.258	16.75	NP_666077.2 lcl|GPHN_4:8-2326_ORF1_GPHN_4:7:2325, XP_006515962.1, XP_006515963.1, XP_006515964.1, XP_006515965.1, XP_006515966.1, XP_006515967.1, XP_006515968.1 lcl|GPHN_38:8-2365_ORF1_GPHN_38:7:2364, XP_006515969.1 lcl|GPHN_3:8-2257_ORF1_GPHN_3:7:2256, XP_006515970.1 lcl|GPHN_1:8-2218_ORF1_GPHN_1:7:2217, XP_017170562.1, XP_017170563.1, XP_017170564.1, XP_017170565.1 lcl|GPHN_29:8-2323_ORF1_GPHN_…
EVIEREAPGM	EVIEREAPGM		34.95	1129.54	0.1	565.779	20.57	NP_666077.2 lcl|GPHN_4:8-2326_ORF1_GPHN_4:7:2325, XP_006515962.1, XP_006515963.1, XP_006515964.1, XP_006515965.1, XP_006515966.1, XP_006515967.1, XP_006515968.1 lcl|GPHN_38:8-2365_ORF1_GPHN_38:7:2364, XP_006515969.1 lcl|GPHN_3:8-2257_ORF1_GPHN_3:7:2256, XP_006515970.1 lcl|GPHN_1:8-2218_ORF1_GPHN_1:7:2217, XP_017170562.1, XP_017170563.1, XP_017170564.1, XP_017170565.1 lcl|GPHN_29:8-2323_ORF1_GPHN_…
EVIEREAPGM	EVIEREAPGM(+15.99)	M10:Oxidation (M):1000.00	34.23	1145.54	-0.9	573.776	17.53	NP_666077.2 lcl|GPHN_4:8-2326_ORF1_GPHN_4:7:2325, XP_006515962.1, XP_006515963.1, XP_006515964.1, XP_006515965.1, XP_006515966.1, XP_006515967.1, XP_006515968.1 lcl|GPHN_38:8-2365_ORF1_GPHN_38:7:2364, XP_006515969.1 lcl|GPHN_3:8-2257_ORF1_GPHN_3:7:2256, XP_006515970.1 lcl|GPHN_1:8-2218_ORF1_GPHN_1:7:2217, XP_017170562.1, XP_017170563.1, XP_017170564.1, XP_017170565.1 lcl|GPHN_29:8-2323_ORF1_GPHN_…
EVIEREAPGMA	EVIEREAPGMA		38.85	1200.58	0.3	601.298	20.43	NP_666077.2 lcl|GPHN_4:8-2326_ORF1_GPHN_4:7:2325, XP_006515962.1, XP_006515963.1, XP_006515964.1, XP_006515965.1, XP_006515966.1, XP_006515967.1, XP_006515968.1 lcl|GPHN_38:8-2365_ORF1_GPHN_38:7:2364, XP_006515969.1 lcl|GPHN_3:8-2257_ORF1_GPHN_3:7:2256, XP_006515970.1 lcl|GPHN_1:8-2218_ORF1_GPHN_1:7:2217, XP_017170562.1, XP_017170563.1, XP_017170564.1, XP_017170565.1 lcl|GPHN_29:8-2323_ORF1_GPHN_…
EVIEREAPGMA	EVIEREAPGM(+15.99)A	M10:Oxidation (M):1000.00	35.62	1216.58	-0.4	609.295	17.77	NP_666077.2 lcl|GPHN_4:8-2326_ORF1_GPHN_4:7:2325, XP_006515962.1, XP_006515963.1, XP_006515964.1, XP_006515965.1, XP_006515966.1, XP_006515967.1, XP_006515968.1 lcl|GPHN_38:8-2365_ORF1_GPHN_38:7:2364, XP_006515969.1 lcl|GPHN_3:8-2257_ORF1_GPHN_3:7:2256, XP_006515970.1 lcl|GPHN_1:8-2218_ORF1_GPHN_1:7:2217, XP_017170562.1, XP_017170563.1, XP_017170564.1, XP_017170565.1 lcl|GPHN_29:8-2323_ORF1_GPHN_…
EVNKFPV	EVNKFPV		18.62	831.449	-1.1	416.731	21.67	NP_666077.2 lcl|GPHN_4:8-2326_ORF1_GPHN_4:7:2325, XP_006515962.1, XP_006515963.1, XP_006515964.1, XP_006515965.1, XP_006515966.1, XP_006515967.1, XP_006515968.1 lcl|GPHN_38:8-2365_ORF1_GPHN_38:7:2364, XP_006515969.1 lcl|GPHN_3:8-2257_ORF1_GPHN_3:7:2256, XP_006515970.1 lcl|GPHN_1:8-2218_ORF1_GPHN_1:7:2217, XP_017170562.1, XP_017170563.1, XP_017170564.1, XP_017170565.1 lcl|GPHN_29:8-2323_ORF1_GPHN_…
EVNKFPVV	EVNKFPVV		28.75	930.518	-1.9	466.265	24.13	NP_666077.2 lcl|GPHN_4:8-2326_ORF1_GPHN_4:7:2325, XP_006515962.1, XP_006515963.1, XP_006515964.1, XP_006515965.1, XP_006515966.1, XP_006515967.1, XP_006515968.1 lcl|GPHN_38:8-2365_ORF1_GPHN_38:7:2364, XP_006515969.1 lcl|GPHN_3:8-2257_ORF1_GPHN_3:7:2256, XP_006515970.1 lcl|GPHN_1:8-2218_ORF1_GPHN_1:7:2217, XP_017170562.1, XP_017170563.1, XP_017170564.1, XP_017170565.1 lcl|GPHN_29:8-2323_ORF1_GPHN_…
EVNKFPVVA	EVNKFPVVA		31.83	1001.55	0.5	501.785	23.7	NP_666077.2 lcl|GPHN_4:8-2326_ORF1_GPHN_4:7:2325, XP_006515962.1, XP_006515963.1, XP_006515964.1, XP_006515965.1, XP_006515966.1, XP_006515967.1, XP_006515968.1 lcl|GPHN_38:8-2365_ORF1_GPHN_38:7:2364, XP_006515969.1 lcl|GPHN_3:8-2257_ORF1_GPHN_3:7:2256, XP_006515970.1 lcl|GPHN_1:8-2218_ORF1_GPHN_1:7:2217, XP_017170562.1, XP_017170563.1, XP_017170564.1, XP_017170565.1 lcl|GPHN_29:8-2323_ORF1_GPHN_…
EVNKFPVVAV	EVNKFPVVAV		36.77	1100.62	0.5	551.319	26.78	NP_666077.2 lcl|GPHN_4:8-2326_ORF1_GPHN_4:7:2325, XP_006515962.1, XP_006515963.1, XP_006515964.1, XP_006515965.1, XP_006515966.1, XP_006515967.1, XP_006515968.1 lcl|GPHN_38:8-2365_ORF1_GPHN_38:7:2364, XP_006515969.1 lcl|GPHN_3:8-2257_ORF1_GPHN_3:7:2256, XP_006515970.1 lcl|GPHN_1:8-2218_ORF1_GPHN_1:7:2217, XP_017170562.1, XP_017170563.1, XP_017170564.1, XP_017170565.1 lcl|GPHN_29:8-2323_ORF1_GPHN_…
EVVDVMVIGR	EVVDVMVIGR		31.28	1115.6	-0.7	558.807	27.47	NP_666077.2 lcl|GPHN_4:8-2326_ORF1_GPHN_4:7:2325, XP_006515962.1, XP_006515963.1, XP_006515964.1, XP_006515965.1, XP_006515966.1, XP_006515967.1, XP_006515968.1 lcl|GPHN_38:8-2365_ORF1_GPHN_38:7:2364, XP_006515969.1 lcl|GPHN_3:8-2257_ORF1_GPHN_3:7:2256, XP_006515970.1 lcl|GPHN_1:8-2218_ORF1_GPHN_1:7:2217, XP_017170562.1, XP_017170563.1, XP_017170564.1, XP_017170565.1 lcl|GPHN_29:8-2323_ORF1_GPHN_…
EVVDVMVIGR	EVVDVM(+15.99)VIGR	M6:Oxidation (M):1000.00	28.31	1131.6	0.4	566.805	24.51	NP_666077.2 lcl|GPHN_4:8-2326_ORF1_GPHN_4:7:2325, XP_006515962.1, XP_006515963.1, XP_006515964.1, XP_006515965.1, XP_006515966.1, XP_006515967.1, XP_006515968.1 lcl|GPHN_38:8-2365_ORF1_GPHN_38:7:2364, XP_006515969.1 lcl|GPHN_3:8-2257_ORF1_GPHN_3:7:2256, XP_006515970.1 lcl|GPHN_1:8-2218_ORF1_GPHN_1:7:2217, XP_017170562.1, XP_017170563.1, XP_017170564.1, XP_017170565.1 lcl|GPHN_29:8-2323_ORF1_GPHN_…
FALPGNPV	FALPGNPV		25.81	813.438	2.8	814.448	30.29	NP_666077.2 lcl|GPHN_4:8-2326_ORF1_GPHN_4:7:2325, XP_006515962.1, XP_006515963.1, XP_006515964.1, XP_006515965.1, XP_006515966.1, XP_006515967.1, XP_006515968.1 lcl|GPHN_38:8-2365_ORF1_GPHN_38:7:2364, XP_006515969.1 lcl|GPHN_3:8-2257_ORF1_GPHN_3:7:2256, XP_006515970.1 lcl|GPHN_1:8-2218_ORF1_GPHN_1:7:2217, XP_017170562.1, XP_017170563.1, XP_017170564.1, XP_017170565.1 lcl|GPHN_29:8-2323_ORF1_GPHN_…
FAPRDVTPE	FAPRDVTPE		28.14	1030.51	-1.3	516.261	20.03	NP_666077.2 lcl|GPHN_4:8-2326_ORF1_GPHN_4:7:2325, XP_006515962.1, XP_006515963.1, XP_006515964.1, XP_006515965.1, XP_006515966.1, XP_006515967.1, XP_006515968.1 lcl|GPHN_38:8-2365_ORF1_GPHN_38:7:2364, XP_006515969.1 lcl|GPHN_3:8-2257_ORF1_GPHN_3:7:2256, XP_006515970.1 lcl|GPHN_1:8-2218_ORF1_GPHN_1:7:2217, XP_017170562.1, XP_017170563.1, XP_017170564.1, XP_017170565.1 lcl|GPHN_29:8-2323_ORF1_GPHN_…
FAPRDVTPEA	FAPRDVTPEA		26.45	1101.55	-0.7	551.78	20.97	NP_666077.2 lcl|GPHN_4:8-2326_ORF1_GPHN_4:7:2325, XP_006515962.1, XP_006515967.1, XP_006515970.1 lcl|GPHN_1:8-2218_ORF1_GPHN_1:7:2217, XP_017170564.1, XP_017170565.1 lcl|GPHN_29:8-2323_ORF1_GPHN_29:7:2322, XP_017170567.1, XP_030102591.1 lcl|GPHN_8:8-2281_ORF1_GPHN_8:7:2280, XP_030102593.1 lcl|GPHN_2:8-1945_ORF1_GPHN_2:7:1944, lcl|GPHN_101:8-994_ORF2_GPHN_101:7:993, lcl|GPHN_102:8-943_ORF2_GPHN_10…
FAPRDVTPEAT	FAPRDVTPEAT		34.47	1202.59	-0.9	602.303	20.92	NP_666077.2 lcl|GPHN_4:8-2326_ORF1_GPHN_4:7:2325, XP_006515962.1, XP_006515967.1, XP_006515970.1 lcl|GPHN_1:8-2218_ORF1_GPHN_1:7:2217, XP_017170564.1, XP_017170565.1 lcl|GPHN_29:8-2323_ORF1_GPHN_29:7:2322, XP_017170567.1, XP_030102591.1 lcl|GPHN_8:8-2281_ORF1_GPHN_8:7:2280, XP_030102593.1 lcl|GPHN_2:8-1945_ORF1_GPHN_2:7:1944, lcl|GPHN_101:8-994_ORF2_GPHN_101:7:993, lcl|GPHN_102:8-943_ORF2_GPHN_10…
FAPRDVTPEATK	FAPRDVTPEATK		40.7	1330.69	3	444.571	17.94	NP_666077.2 lcl|GPHN_4:8-2326_ORF1_GPHN_4:7:2325, XP_006515962.1, XP_006515967.1, XP_006515970.1 lcl|GPHN_1:8-2218_ORF1_GPHN_1:7:2217, XP_017170564.1, XP_017170565.1 lcl|GPHN_29:8-2323_ORF1_GPHN_29:7:2322, XP_017170567.1, XP_030102591.1 lcl|GPHN_8:8-2281_ORF1_GPHN_8:7:2280, XP_030102593.1 lcl|GPHN_2:8-1945_ORF1_GPHN_2:7:1944, lcl|GPHN_101:8-994_ORF2_GPHN_101:7:993, lcl|GPHN_102:8-943_ORF2_GPHN_10…
FAPRDVTPEATKE	FAPRDVTPEATKE		36.53	1459.73	-0.4	487.584	18.42	NP_666077.2 lcl|GPHN_4:8-2326_ORF1_GPHN_4:7:2325, XP_006515962.1, XP_006515967.1, XP_006515970.1 lcl|GPHN_1:8-2218_ORF1_GPHN_1:7:2217, XP_017170564.1, XP_017170565.1 lcl|GPHN_29:8-2323_ORF1_GPHN_29:7:2322, XP_017170567.1, XP_030102591.1 lcl|GPHN_8:8-2281_ORF1_GPHN_8:7:2280, XP_030102593.1 lcl|GPHN_2:8-1945_ORF1_GPHN_2:7:1944, lcl|GPHN_101:8-994_ORF2_GPHN_101:7:993, lcl|GPHN_102:8-943_ORF2_GPHN_10…
FAPRDVTPEATKEVIE	FAPRDVTPEATKEVIE		45.59	1800.93	-1.8	601.315	23.14	NP_666077.2 lcl|GPHN_4:8-2326_ORF1_GPHN_4:7:2325, XP_006515962.1, XP_006515967.1, XP_006515970.1 lcl|GPHN_1:8-2218_ORF1_GPHN_1:7:2217, XP_017170564.1, XP_017170565.1 lcl|GPHN_29:8-2323_ORF1_GPHN_29:7:2322, XP_017170567.1, XP_030102591.1 lcl|GPHN_8:8-2281_ORF1_GPHN_8:7:2280, XP_030102593.1 lcl|GPHN_2:8-1945_ORF1_GPHN_2:7:1944, lcl|GPHN_101:8-994_ORF2_GPHN_101:7:993, lcl|GPHN_102:8-943_ORF2_GPHN_10…
FAPRDVTPEATKEVIEREAPG	FAPRDVTPEATKEVIEREAPG		42.76	2311.18	2.1	771.403	23.95	NP_666077.2 lcl|GPHN_4:8-2326_ORF1_GPHN_4:7:2325, XP_006515962.1, XP_006515967.1, XP_006515970.1 lcl|GPHN_1:8-2218_ORF1_GPHN_1:7:2217, XP_017170564.1, XP_017170565.1 lcl|GPHN_29:8-2323_ORF1_GPHN_29:7:2322, XP_017170567.1, XP_030102591.1 lcl|GPHN_8:8-2281_ORF1_GPHN_8:7:2280, XP_030102593.1 lcl|GPHN_2:8-1945_ORF1_GPHN_2:7:1944, lcl|GPHN_101:8-994_ORF2_GPHN_101:7:993, lcl|GPHN_102:8-943_ORF2_GPHN_10…
FAPRDVTPEATKEVIEREAPGMA	FAPRDVTPEATKEVIEREAPGM(+15.99)A	M22:Oxidation (M):1000.00	49.6	2529.25	-0.1	844.092	24.07	NP_666077.2 lcl|GPHN_4:8-2326_ORF1_GPHN_4:7:2325, XP_006515962.1, XP_006515967.1, XP_006515970.1 lcl|GPHN_1:8-2218_ORF1_GPHN_1:7:2217, XP_017170564.1, XP_017170565.1 lcl|GPHN_29:8-2323_ORF1_GPHN_29:7:2322, XP_017170567.1, XP_030102591.1 lcl|GPHN_8:8-2281_ORF1_GPHN_8:7:2280, XP_030102593.1 lcl|GPHN_2:8-1945_ORF1_GPHN_2:7:1944, lcl|GPHN_101:8-994_ORF2_GPHN_101:7:993, lcl|GPHN_102:8-943_ORF2_GPHN_10…
FAPRDVTPEKFPT	FAPRDVTPEKFPT		18.95	1503.77	3.7	502.267	22.66	XP_006515963.1, XP_006515964.1, XP_006515965.1, XP_006515966.1, XP_006515968.1 lcl|GPHN_38:8-2365_ORF1_GPHN_38:7:2364, XP_006515969.1 lcl|GPHN_3:8-2257_ORF1_GPHN_3:7:2256, XP_017170562.1, XP_017170563.1, XP_017170566.1, XP_017170568.1, XP_030102590.1 lcl|GPHN_41:8-2320_ORF1_GPHN_41:7:2319, XP_030102592.1, lcl|GPHN_100:8-925_ORF2_GPHN_100:7:924 lcl|GPHN_220:8-925_ORF2_GPHN_220:7:924, lcl|GPHN_107:…
FAPRDVTPEKFPTFP	FAPRDVTPEKFPTFP		28.56	1747.89	-1.5	583.638	27.79	XP_006515963.1, XP_006515964.1, XP_006515965.1, XP_006515966.1, XP_006515968.1 lcl|GPHN_38:8-2365_ORF1_GPHN_38:7:2364, XP_006515969.1 lcl|GPHN_3:8-2257_ORF1_GPHN_3:7:2256, XP_017170562.1, XP_017170563.1, XP_017170566.1, XP_017170568.1, XP_030102590.1 lcl|GPHN_41:8-2320_ORF1_GPHN_41:7:2319, XP_030102592.1, lcl|GPHN_100:8-925_ORF2_GPHN_100:7:924 lcl|GPHN_220:8-925_ORF2_GPHN_220:7:924, lcl|GPHN_107:…
FATLDIDGVR	FATLDIDGVR		32.19	1105.58	-1.2	553.795	26.35	NP_666077.2 lcl|GPHN_4:8-2326_ORF1_GPHN_4:7:2325, XP_006515962.1, XP_006515963.1, XP_006515964.1, XP_006515965.1, XP_006515966.1, XP_006515967.1, XP_006515968.1 lcl|GPHN_38:8-2365_ORF1_GPHN_38:7:2364, XP_006515969.1 lcl|GPHN_3:8-2257_ORF1_GPHN_3:7:2256, XP_006515970.1 lcl|GPHN_1:8-2218_ORF1_GPHN_1:7:2217, XP_017170562.1, XP_017170563.1, XP_017170564.1, XP_017170565.1 lcl|GPHN_29:8-2323_ORF1_GPHN_…
FATLDIDGVRK	FATLDIDGVRK		25.38	1233.67	1.5	412.232	22.42	NP_666077.2 lcl|GPHN_4:8-2326_ORF1_GPHN_4:7:2325, XP_006515962.1, XP_006515963.1, XP_006515964.1, XP_006515965.1, XP_006515966.1, XP_006515967.1, XP_006515968.1 lcl|GPHN_38:8-2365_ORF1_GPHN_38:7:2364, XP_006515969.1 lcl|GPHN_3:8-2257_ORF1_GPHN_3:7:2256, XP_006515970.1 lcl|GPHN_1:8-2218_ORF1_GPHN_1:7:2217, XP_017170562.1, XP_017170563.1, XP_017170564.1, XP_017170565.1 lcl|GPHN_29:8-2323_ORF1_GPHN_…
FATLDIDGVRKI	FATLDIDGVRKI		26.55	1346.76	-0.6	449.926	25.36	NP_666077.2 lcl|GPHN_4:8-2326_ORF1_GPHN_4:7:2325, XP_006515962.1, XP_006515963.1, XP_006515964.1, XP_006515965.1, XP_006515966.1, XP_006515967.1, XP_006515968.1 lcl|GPHN_38:8-2365_ORF1_GPHN_38:7:2364, XP_006515969.1 lcl|GPHN_3:8-2257_ORF1_GPHN_3:7:2256, XP_006515970.1 lcl|GPHN_1:8-2218_ORF1_GPHN_1:7:2217, XP_017170562.1, XP_017170563.1, XP_017170564.1, XP_017170565.1 lcl|GPHN_29:8-2323_ORF1_GPHN_…
FGRVFMKPGLPTT	FGRVFM(+15.99)KPGLPTT	M6:Oxidation (M):1000.00	39	1465.78	1	733.896	22.55	NP_666077.2 lcl|GPHN_4:8-2326_ORF1_GPHN_4:7:2325, XP_006515962.1, XP_006515963.1, XP_006515964.1, XP_006515965.1, XP_006515966.1, XP_006515967.1, XP_006515968.1 lcl|GPHN_38:8-2365_ORF1_GPHN_38:7:2364, XP_006515969.1 lcl|GPHN_3:8-2257_ORF1_GPHN_3:7:2256, XP_006515970.1 lcl|GPHN_1:8-2218_ORF1_GPHN_1:7:2217, XP_017170562.1, XP_017170563.1, XP_017170564.1, XP_017170565.1 lcl|GPHN_29:8-2323_ORF1_GPHN_…
FGRVFMKPGLPTTF	FGRVFM(+15.99)KPGLPTTF	M6:Oxidation (M):1000.00	33.16	1612.84	0.2	538.622	26.39	NP_666077.2 lcl|GPHN_4:8-2326_ORF1_GPHN_4:7:2325, XP_006515962.1, XP_006515963.1, XP_006515964.1, XP_006515965.1, XP_006515966.1, XP_006515967.1, XP_006515968.1 lcl|GPHN_38:8-2365_ORF1_GPHN_38:7:2364, XP_006515969.1 lcl|GPHN_3:8-2257_ORF1_GPHN_3:7:2256, XP_006515970.1 lcl|GPHN_1:8-2218_ORF1_GPHN_1:7:2217, XP_017170562.1, XP_017170563.1, XP_017170564.1, XP_017170565.1 lcl|GPHN_29:8-2323_ORF1_GPHN_…
FIIGESQAGEQPTQTVMPG	FIIGESQAGEQPTQTVM(+15.99)PG	M17:Oxidation (M):1000.00	20.27	2004.95	1.4	1003.48	28.19	NP_666077.2 lcl|GPHN_4:8-2326_ORF1_GPHN_4:7:2325, XP_006515962.1, XP_006515963.1, XP_006515964.1, XP_006515965.1, XP_006515966.1, XP_006515967.1, XP_006515968.1 lcl|GPHN_38:8-2365_ORF1_GPHN_38:7:2364, XP_006515969.1 lcl|GPHN_3:8-2257_ORF1_GPHN_3:7:2256, XP_006515970.1 lcl|GPHN_1:8-2218_ORF1_GPHN_1:7:2217, XP_017170562.1, XP_017170563.1, XP_017170564.1, XP_017170565.1 lcl|GPHN_29:8-2323_ORF1_GPHN_…
FIIGESQAGEQPTQTVMPGQVMR	FIIGESQAGEQPTQTVMPGQVMR		58.47	2503.22	-0.6	1252.62	28.58	NP_666077.2 lcl|GPHN_4:8-2326_ORF1_GPHN_4:7:2325, XP_006515962.1, XP_006515963.1, XP_006515964.1, XP_006515965.1, XP_006515966.1, XP_006515967.1, XP_006515968.1 lcl|GPHN_38:8-2365_ORF1_GPHN_38:7:2364, XP_006515969.1 lcl|GPHN_3:8-2257_ORF1_GPHN_3:7:2256, XP_006515970.1 lcl|GPHN_1:8-2218_ORF1_GPHN_1:7:2217, XP_017170562.1, XP_017170563.1, XP_017170564.1, XP_017170565.1 lcl|GPHN_29:8-2323_ORF1_GPHN_…
FIIGESQAGEQPTQTVMPGQVMR	FIIGESQAGEQPTQTVM(+15.99)PGQVMR	M17:Oxidation (M):61.30	57.14	2519.21	0.5	1260.62	26.83	NP_666077.2 lcl|GPHN_4:8-2326_ORF1_GPHN_4:7:2325, XP_006515962.1, XP_006515963.1, XP_006515964.1, XP_006515965.1, XP_006515966.1, XP_006515967.1, XP_006515968.1 lcl|GPHN_38:8-2365_ORF1_GPHN_38:7:2364, XP_006515969.1 lcl|GPHN_3:8-2257_ORF1_GPHN_3:7:2256, XP_006515970.1 lcl|GPHN_1:8-2218_ORF1_GPHN_1:7:2217, XP_017170562.1, XP_017170563.1, XP_017170564.1, XP_017170565.1 lcl|GPHN_29:8-2323_ORF1_GPHN_…
FIIGESQAGEQPTQTVMPGQVMR	FIIGESQAGEQPTQTVM(+15.99)PGQVM(+15.99)R	M17:Oxidation (M):1000.00;M22:Oxidation (M):1000.00	51.48	2535.21	-0.1	634.81	25.14	NP_666077.2 lcl|GPHN_4:8-2326_ORF1_GPHN_4:7:2325, XP_006515962.1, XP_006515963.1, XP_006515964.1, XP_006515965.1, XP_006515966.1, XP_006515967.1, XP_006515968.1 lcl|GPHN_38:8-2365_ORF1_GPHN_38:7:2364, XP_006515969.1 lcl|GPHN_3:8-2257_ORF1_GPHN_3:7:2256, XP_006515970.1 lcl|GPHN_1:8-2218_ORF1_GPHN_1:7:2217, XP_017170562.1, XP_017170563.1, XP_017170564.1, XP_017170565.1 lcl|GPHN_29:8-2323_ORF1_GPHN_…
FIIGESQAGEQPTQTVMPGQVMR	FIIGESQAGEQPTQTVMPGQVM(+15.99)R	M22:Oxidation (M):10.19	30.49	2519.21	-0.3	1260.61	28.05	NP_666077.2 lcl|GPHN_4:8-2326_ORF1_GPHN_4:7:2325, XP_006515962.1, XP_006515963.1, XP_006515964.1, XP_006515965.1, XP_006515966.1, XP_006515967.1, XP_006515968.1 lcl|GPHN_38:8-2365_ORF1_GPHN_38:7:2364, XP_006515969.1 lcl|GPHN_3:8-2257_ORF1_GPHN_3:7:2256, XP_006515970.1 lcl|GPHN_1:8-2218_ORF1_GPHN_1:7:2217, XP_017170562.1, XP_017170563.1, XP_017170564.1, XP_017170565.1 lcl|GPHN_29:8-2323_ORF1_GPHN_…
FIIGESQAGEQPTQTVMPGQVMRVTTGAPIPCGADAVVQVEDTELIR	FIIGES(+79.97)QAGEQPTQTVMPGQVMRVTTGAPIPC(+57.02)GADAVVQVEDTELIR	S6:Phosphorylation (STY):0.00;C32:Carbamidomethylation:1000.00	25.69	5075.44	3.2	1016.1	31.31	NP_666077.2 lcl|GPHN_4:8-2326_ORF1_GPHN_4:7:2325, XP_006515962.1, XP_006515963.1, XP_006515964.1, XP_006515965.1, XP_006515966.1, XP_006515967.1, XP_006515968.1 lcl|GPHN_38:8-2365_ORF1_GPHN_38:7:2364, XP_006515969.1 lcl|GPHN_3:8-2257_ORF1_GPHN_3:7:2256, XP_006515970.1 lcl|GPHN_1:8-2218_ORF1_GPHN_1:7:2217, XP_017170562.1, XP_017170563.1, XP_017170564.1, XP_017170565.1 lcl|GPHN_29:8-2323_ORF1_GPHN_…
FILPALPH	FILPALPH		27.02	906.533	-0.4	454.273	30.82	NP_666077.2 lcl|GPHN_4:8-2326_ORF1_GPHN_4:7:2325, XP_006515962.1, XP_006515963.1, XP_006515964.1, XP_006515965.1, XP_006515966.1, XP_006515967.1, XP_006515968.1 lcl|GPHN_38:8-2365_ORF1_GPHN_38:7:2364, XP_006515969.1 lcl|GPHN_3:8-2257_ORF1_GPHN_3:7:2256, XP_006515970.1 lcl|GPHN_1:8-2218_ORF1_GPHN_1:7:2217, XP_017170562.1, XP_017170563.1, XP_017170564.1, XP_017170565.1 lcl|GPHN_29:8-2323_ORF1_GPHN_…
FILPALPHA	FILPALPHA		26.02	977.57	0.3	489.792	30.69	NP_666077.2 lcl|GPHN_4:8-2326_ORF1_GPHN_4:7:2325, XP_006515962.1, XP_006515963.1, XP_006515964.1, XP_006515965.1, XP_006515966.1, XP_006515967.1, XP_006515968.1 lcl|GPHN_38:8-2365_ORF1_GPHN_38:7:2364, XP_006515969.1 lcl|GPHN_3:8-2257_ORF1_GPHN_3:7:2256, XP_006515970.1 lcl|GPHN_1:8-2218_ORF1_GPHN_1:7:2217, XP_017170562.1, XP_017170563.1, XP_017170564.1, XP_017170565.1 lcl|GPHN_29:8-2323_ORF1_GPHN_…
FILPALPHA	F(+42.01)ILPALPHA	F1:Acetylation (Protein N-term):1000.00	24.63	1019.58	-1	510.797	39.32	NP_666077.2 lcl|GPHN_4:8-2326_ORF1_GPHN_4:7:2325, XP_006515962.1, XP_006515963.1, XP_006515964.1, XP_006515965.1, XP_006515966.1, XP_006515967.1, XP_006515968.1 lcl|GPHN_38:8-2365_ORF1_GPHN_38:7:2364, XP_006515969.1 lcl|GPHN_3:8-2257_ORF1_GPHN_3:7:2256, XP_006515970.1 lcl|GPHN_1:8-2218_ORF1_GPHN_1:7:2217, XP_017170562.1, XP_017170563.1, XP_017170564.1, XP_017170565.1 lcl|GPHN_29:8-2323_ORF1_GPHN_…
FILPALPHAI	FILPALPHAI		29.31	1090.65	1	546.335	32.51	NP_666077.2 lcl|GPHN_4:8-2326_ORF1_GPHN_4:7:2325, XP_006515962.1, XP_006515963.1, XP_006515964.1, XP_006515965.1, XP_006515966.1, XP_006515967.1, XP_006515968.1 lcl|GPHN_38:8-2365_ORF1_GPHN_38:7:2364, XP_006515969.1 lcl|GPHN_3:8-2257_ORF1_GPHN_3:7:2256, XP_006515970.1 lcl|GPHN_1:8-2218_ORF1_GPHN_1:7:2217, XP_017170562.1, XP_017170563.1, XP_017170564.1, XP_017170565.1 lcl|GPHN_29:8-2323_ORF1_GPHN_…
FILPALPHAIDLLR	FILPALPHAIDLLR		26.95	1587.95	-0.9	530.323	33.76	NP_666077.2 lcl|GPHN_4:8-2326_ORF1_GPHN_4:7:2325, XP_006515962.1, XP_006515963.1, XP_006515964.1, XP_006515965.1, XP_006515966.1, XP_006515967.1, XP_006515968.1 lcl|GPHN_38:8-2365_ORF1_GPHN_38:7:2364, XP_006515969.1 lcl|GPHN_3:8-2257_ORF1_GPHN_3:7:2256, XP_006515970.1 lcl|GPHN_1:8-2218_ORF1_GPHN_1:7:2217, XP_017170562.1, XP_017170563.1, XP_017170564.1, XP_017170565.1 lcl|GPHN_29:8-2323_ORF1_GPHN_…
FITVLEMTPVLGTE	FITVLEM(+15.99)TPVLGTE	M7:Oxidation (M):1000.00	38.25	1564.81	0.5	783.41	35.46	NP_666077.2 lcl|GPHN_4:8-2326_ORF1_GPHN_4:7:2325, XP_006515962.1, XP_006515963.1, XP_006515964.1, XP_006515965.1, XP_006515966.1, XP_006515967.1, XP_006515968.1 lcl|GPHN_38:8-2365_ORF1_GPHN_38:7:2364, XP_006515969.1 lcl|GPHN_3:8-2257_ORF1_GPHN_3:7:2256, XP_006515970.1 lcl|GPHN_1:8-2218_ORF1_GPHN_1:7:2217, XP_017170562.1, XP_017170563.1, XP_017170564.1, XP_017170565.1 lcl|GPHN_29:8-2323_ORF1_GPHN_…
FITVLEMTPVLGTE	FITVLEMTPVLGTE		24.88	1548.81	-0.2	775.413	39.08	NP_666077.2 lcl|GPHN_4:8-2326_ORF1_GPHN_4:7:2325, XP_006515962.1, XP_006515963.1, XP_006515964.1, XP_006515965.1, XP_006515966.1, XP_006515967.1, XP_006515968.1 lcl|GPHN_38:8-2365_ORF1_GPHN_38:7:2364, XP_006515969.1 lcl|GPHN_3:8-2257_ORF1_GPHN_3:7:2256, XP_006515970.1 lcl|GPHN_1:8-2218_ORF1_GPHN_1:7:2217, XP_017170562.1, XP_017170563.1, XP_017170564.1, XP_017170565.1 lcl|GPHN_29:8-2323_ORF1_GPHN_…
FITVLEMTPVLGTE	F(+42.01)ITVLEM(+15.99)TPVLGTE	F1:Acetylation (Protein N-term):1000.00;M7:Oxidation (M):1000.00	24.18	1606.82	1.1	804.416	40.85	NP_666077.2 lcl|GPHN_4:8-2326_ORF1_GPHN_4:7:2325, XP_006515962.1, XP_006515963.1, XP_006515964.1, XP_006515965.1, XP_006515966.1, XP_006515967.1, XP_006515968.1 lcl|GPHN_38:8-2365_ORF1_GPHN_38:7:2364, XP_006515969.1 lcl|GPHN_3:8-2257_ORF1_GPHN_3:7:2256, XP_006515970.1 lcl|GPHN_1:8-2218_ORF1_GPHN_1:7:2217, XP_017170562.1, XP_017170563.1, XP_017170564.1, XP_017170565.1 lcl|GPHN_29:8-2323_ORF1_GPHN_…
FITVLEMTPVLGTEII	FITVLEM(+15.99)TPVLGTEII	M7:Oxidation (M):1000.00	30.16	1790.97	0.3	896.495	39.2	NP_666077.2 lcl|GPHN_4:8-2326_ORF1_GPHN_4:7:2325, XP_006515962.1, XP_006515963.1, XP_006515964.1, XP_006515965.1, XP_006515966.1, XP_006515967.1, XP_006515968.1 lcl|GPHN_38:8-2365_ORF1_GPHN_38:7:2364, XP_006515969.1 lcl|GPHN_3:8-2257_ORF1_GPHN_3:7:2256, XP_006515970.1 lcl|GPHN_1:8-2218_ORF1_GPHN_1:7:2217, XP_017170562.1, XP_017170563.1, XP_017170564.1, XP_017170565.1 lcl|GPHN_29:8-2323_ORF1_GPHN_…
FMANHGQPIPG	FM(+15.99)ANHGQPIPG	M2:Oxidation (M):1000.00	26.18	1183.54	-0.2	592.779	18.7	NP_666077.2 lcl|GPHN_4:8-2326_ORF1_GPHN_4:7:2325, XP_006515962.1, XP_006515963.1, XP_006515964.1, XP_006515965.1, XP_006515968.1 lcl|GPHN_38:8-2365_ORF1_GPHN_38:7:2364, XP_017170562.1, XP_017170563.1, XP_017170564.1, lcl|GPHN_101:8-994_ORF2_GPHN_101:7:993, lcl|GPHN_105:73-2247_ORF1_GPHN_105:72:2246, lcl|GPHN_119:441-2183_ORF3_GPHN_119:440:2182, lcl|GPHN_121:8-2368_ORF1_GPHN_121:7:2367, lcl|GPHN_1…
FMANHGQPIPG	FMANHGQPIPG		24.68	1167.55	0.7	584.782	20.43	NP_666077.2 lcl|GPHN_4:8-2326_ORF1_GPHN_4:7:2325, XP_006515962.1, XP_006515963.1, XP_006515964.1, XP_006515965.1, XP_006515968.1 lcl|GPHN_38:8-2365_ORF1_GPHN_38:7:2364, XP_017170562.1, XP_017170563.1, XP_017170564.1, lcl|GPHN_101:8-994_ORF2_GPHN_101:7:993, lcl|GPHN_105:73-2247_ORF1_GPHN_105:72:2246, lcl|GPHN_119:441-2183_ORF3_GPHN_119:440:2182, lcl|GPHN_121:8-2368_ORF1_GPHN_121:7:2367, lcl|GPHN_1…
FMANHGQPIPGL	FM(+15.99)ANHGQPIPGL	M2:Oxidation (M):1000.00	25	1296.63	-0.4	649.321	24.66	NP_666077.2 lcl|GPHN_4:8-2326_ORF1_GPHN_4:7:2325, XP_006515962.1, XP_006515963.1, XP_006515964.1, XP_006515965.1, XP_006515968.1 lcl|GPHN_38:8-2365_ORF1_GPHN_38:7:2364, XP_017170562.1, XP_017170563.1, XP_017170564.1, lcl|GPHN_101:8-994_ORF2_GPHN_101:7:993, lcl|GPHN_105:73-2247_ORF1_GPHN_105:72:2246, lcl|GPHN_119:441-2183_ORF3_GPHN_119:440:2182, lcl|GPHN_121:8-2368_ORF1_GPHN_121:7:2367, lcl|GPHN_1…
FMANHGQPIPGL	FMANHGQPIPGL		18.22	1280.63	-0.4	641.324	26.1	NP_666077.2 lcl|GPHN_4:8-2326_ORF1_GPHN_4:7:2325, XP_006515962.1, XP_006515963.1, XP_006515964.1, XP_006515965.1, XP_006515968.1 lcl|GPHN_38:8-2365_ORF1_GPHN_38:7:2364, XP_017170562.1, XP_017170563.1, XP_017170564.1, lcl|GPHN_101:8-994_ORF2_GPHN_101:7:993, lcl|GPHN_105:73-2247_ORF1_GPHN_105:72:2246, lcl|GPHN_119:441-2183_ORF3_GPHN_119:440:2182, lcl|GPHN_121:8-2368_ORF1_GPHN_121:7:2367, lcl|GPHN_1…
FMKPGLPT	FMKPGLPT		33.86	889.473	1.4	890.482	22.85	NP_666077.2 lcl|GPHN_4:8-2326_ORF1_GPHN_4:7:2325, XP_006515962.1, XP_006515963.1, XP_006515964.1, XP_006515965.1, XP_006515966.1, XP_006515967.1, XP_006515968.1 lcl|GPHN_38:8-2365_ORF1_GPHN_38:7:2364, XP_006515969.1 lcl|GPHN_3:8-2257_ORF1_GPHN_3:7:2256, XP_006515970.1 lcl|GPHN_1:8-2218_ORF1_GPHN_1:7:2217, XP_017170562.1, XP_017170563.1, XP_017170564.1, XP_017170565.1 lcl|GPHN_29:8-2323_ORF1_GPHN_…
FMKPGLPT	FM(+15.99)KPGLPT	M2:Oxidation (M):1000.00	26	905.468	-1.1	453.741	20.82	NP_666077.2 lcl|GPHN_4:8-2326_ORF1_GPHN_4:7:2325, XP_006515962.1, XP_006515963.1, XP_006515964.1, XP_006515965.1, XP_006515966.1, XP_006515967.1, XP_006515968.1 lcl|GPHN_38:8-2365_ORF1_GPHN_38:7:2364, XP_006515969.1 lcl|GPHN_3:8-2257_ORF1_GPHN_3:7:2256, XP_006515970.1 lcl|GPHN_1:8-2218_ORF1_GPHN_1:7:2217, XP_017170562.1, XP_017170563.1, XP_017170564.1, XP_017170565.1 lcl|GPHN_29:8-2323_ORF1_GPHN_…
FMKPGLPTT	FM(+15.99)KPGLPTT	M2:Oxidation (M):1000.00	31.7	1006.52	2.1	504.266	21.19	NP_666077.2 lcl|GPHN_4:8-2326_ORF1_GPHN_4:7:2325, XP_006515962.1, XP_006515963.1, XP_006515964.1, XP_006515965.1, XP_006515966.1, XP_006515967.1, XP_006515968.1 lcl|GPHN_38:8-2365_ORF1_GPHN_38:7:2364, XP_006515969.1 lcl|GPHN_3:8-2257_ORF1_GPHN_3:7:2256, XP_006515970.1 lcl|GPHN_1:8-2218_ORF1_GPHN_1:7:2217, XP_017170562.1, XP_017170563.1, XP_017170564.1, XP_017170565.1 lcl|GPHN_29:8-2323_ORF1_GPHN_…
FMKPGLPTT	FMKPGLPTT		31.66	990.521	1.1	496.268	23.06	NP_666077.2 lcl|GPHN_4:8-2326_ORF1_GPHN_4:7:2325, XP_006515962.1, XP_006515963.1, XP_006515964.1, XP_006515965.1, XP_006515966.1, XP_006515967.1, XP_006515968.1 lcl|GPHN_38:8-2365_ORF1_GPHN_38:7:2364, XP_006515969.1 lcl|GPHN_3:8-2257_ORF1_GPHN_3:7:2256, XP_006515970.1 lcl|GPHN_1:8-2218_ORF1_GPHN_1:7:2217, XP_017170562.1, XP_017170563.1, XP_017170564.1, XP_017170565.1 lcl|GPHN_29:8-2323_ORF1_GPHN_…
FMKPGLPTTF	FM(+15.99)KPGLPTTF	M2:Oxidation (M):1000.00	32.19	1153.58	0.5	577.8	26.21	NP_666077.2 lcl|GPHN_4:8-2326_ORF1_GPHN_4:7:2325, XP_006515962.1, XP_006515963.1, XP_006515964.1, XP_006515965.1, XP_006515966.1, XP_006515967.1, XP_006515968.1 lcl|GPHN_38:8-2365_ORF1_GPHN_38:7:2364, XP_006515969.1 lcl|GPHN_3:8-2257_ORF1_GPHN_3:7:2256, XP_006515970.1 lcl|GPHN_1:8-2218_ORF1_GPHN_1:7:2217, XP_017170562.1, XP_017170563.1, XP_017170564.1, XP_017170565.1 lcl|GPHN_29:8-2323_ORF1_GPHN_…
FMKPGLPTTFA	FMKPGLPTTFA		34.41	1208.63	0.4	605.321	27.59	NP_666077.2 lcl|GPHN_4:8-2326_ORF1_GPHN_4:7:2325, XP_006515962.1, XP_006515963.1, XP_006515964.1, XP_006515965.1, XP_006515966.1, XP_006515967.1, XP_006515968.1 lcl|GPHN_38:8-2365_ORF1_GPHN_38:7:2364, XP_006515969.1 lcl|GPHN_3:8-2257_ORF1_GPHN_3:7:2256, XP_006515970.1 lcl|GPHN_1:8-2218_ORF1_GPHN_1:7:2217, XP_017170562.1, XP_017170563.1, XP_017170564.1, XP_017170565.1 lcl|GPHN_29:8-2323_ORF1_GPHN_…
FMKPGLPTTFATLDIDGVR	FM(+15.99)KPGLPTTFATLDIDGVR	M2:Oxidation (M):1000.00	29.26	2094.08	0.6	699.035	29.42	NP_666077.2 lcl|GPHN_4:8-2326_ORF1_GPHN_4:7:2325, XP_006515962.1, XP_006515963.1, XP_006515964.1, XP_006515965.1, XP_006515966.1, XP_006515967.1, XP_006515968.1 lcl|GPHN_38:8-2365_ORF1_GPHN_38:7:2364, XP_006515969.1 lcl|GPHN_3:8-2257_ORF1_GPHN_3:7:2256, XP_006515970.1 lcl|GPHN_1:8-2218_ORF1_GPHN_1:7:2217, XP_017170562.1, XP_017170563.1, XP_017170564.1, XP_017170565.1 lcl|GPHN_29:8-2323_ORF1_GPHN_…
FMKPGLPTTFATLDIDGVRK	FM(+15.99)KPGLPTTFATLDIDGVRK	M2:Oxidation (M):1000.00	32.96	2222.18	4.2	556.554	26.81	NP_666077.2 lcl|GPHN_4:8-2326_ORF1_GPHN_4:7:2325, XP_006515962.1, XP_006515963.1, XP_006515964.1, XP_006515965.1, XP_006515966.1, XP_006515967.1, XP_006515968.1 lcl|GPHN_38:8-2365_ORF1_GPHN_38:7:2364, XP_006515969.1 lcl|GPHN_3:8-2257_ORF1_GPHN_3:7:2256, XP_006515970.1 lcl|GPHN_1:8-2218_ORF1_GPHN_1:7:2217, XP_017170562.1, XP_017170563.1, XP_017170564.1, XP_017170565.1 lcl|GPHN_29:8-2323_ORF1_GPHN_…
FPTFPFCGLQK	FPTFPFC(+57.02)GLQK	C7:Carbamidomethylation:1000.00	37.87	1340.66	-0.1	671.337	31.36	XP_006515963.1, XP_006515964.1, XP_006515965.1, XP_006515966.1, XP_006515968.1 lcl|GPHN_38:8-2365_ORF1_GPHN_38:7:2364, XP_006515969.1 lcl|GPHN_3:8-2257_ORF1_GPHN_3:7:2256, XP_017170562.1, XP_017170563.1, XP_017170566.1, XP_017170568.1, XP_030102590.1 lcl|GPHN_41:8-2320_ORF1_GPHN_41:7:2319, XP_030102592.1, lcl|GPHN_100:8-925_ORF2_GPHN_100:7:924 lcl|GPHN_220:8-925_ORF2_GPHN_220:7:924, lcl|GPHN_107:…
FPVVAVM	FPVVAVM(+15.99)	M7:Oxidation (M):1000.00	19.42	777.409	1.6	778.418	28.7	NP_666077.2 lcl|GPHN_4:8-2326_ORF1_GPHN_4:7:2325, XP_006515962.1, XP_006515963.1, XP_006515964.1, XP_006515965.1, XP_006515966.1, XP_006515967.1, XP_006515968.1 lcl|GPHN_38:8-2365_ORF1_GPHN_38:7:2364, XP_006515969.1 lcl|GPHN_3:8-2257_ORF1_GPHN_3:7:2256, XP_006515970.1 lcl|GPHN_1:8-2218_ORF1_GPHN_1:7:2217, XP_017170562.1, XP_017170563.1, XP_017170564.1, XP_017170565.1 lcl|GPHN_29:8-2323_ORF1_GPHN_…
FPVVAVMSTGNELLNPEDDLLPGK	FPVVAVMSTGNELLNPEDDLLPGK		58.4	2554.3	0.6	1278.16	35.83	NP_666077.2 lcl|GPHN_4:8-2326_ORF1_GPHN_4:7:2325, XP_006515962.1, XP_006515963.1, XP_006515964.1, XP_006515965.1, XP_006515966.1, XP_006515967.1, XP_006515968.1 lcl|GPHN_38:8-2365_ORF1_GPHN_38:7:2364, XP_006515969.1 lcl|GPHN_3:8-2257_ORF1_GPHN_3:7:2256, XP_006515970.1 lcl|GPHN_1:8-2218_ORF1_GPHN_1:7:2217, XP_017170562.1, XP_017170563.1, XP_017170564.1, XP_017170565.1 lcl|GPHN_29:8-2323_ORF1_GPHN_…
FPVVAVMSTGNELLNPEDDLLPGK	FPVVAVM(+15.99)STGNELLNPEDDLLPGK	M7:Oxidation (M):1000.00	54.47	2570.29	1.4	857.773	33.57	NP_666077.2 lcl|GPHN_4:8-2326_ORF1_GPHN_4:7:2325, XP_006515962.1, XP_006515963.1, XP_006515964.1, XP_006515965.1, XP_006515966.1, XP_006515967.1, XP_006515968.1 lcl|GPHN_38:8-2365_ORF1_GPHN_38:7:2364, XP_006515969.1 lcl|GPHN_3:8-2257_ORF1_GPHN_3:7:2256, XP_006515970.1 lcl|GPHN_1:8-2218_ORF1_GPHN_1:7:2217, XP_017170562.1, XP_017170563.1, XP_017170564.1, XP_017170565.1 lcl|GPHN_29:8-2323_ORF1_GPHN_…
FQFILPALPHAI	FQFILPALPHAI		33.09	1365.78	0.2	683.898	35.61	NP_666077.2 lcl|GPHN_4:8-2326_ORF1_GPHN_4:7:2325, XP_006515962.1, XP_006515963.1, XP_006515964.1, XP_006515965.1, XP_006515966.1, XP_006515967.1, XP_006515968.1 lcl|GPHN_38:8-2365_ORF1_GPHN_38:7:2364, XP_006515969.1 lcl|GPHN_3:8-2257_ORF1_GPHN_3:7:2256, XP_006515970.1 lcl|GPHN_1:8-2218_ORF1_GPHN_1:7:2217, XP_017170562.1, XP_017170563.1, XP_017170564.1, XP_017170565.1 lcl|GPHN_29:8-2323_ORF1_GPHN_…
FRNLAEDRSG	FRNLAEDRSG		37.64	1163.57	-1.1	582.791	16.04	NP_666077.2 lcl|GPHN_4:8-2326_ORF1_GPHN_4:7:2325, XP_006515962.1, XP_006515963.1, XP_006515964.1, XP_006515965.1, XP_006515966.1, XP_006515967.1, XP_006515968.1 lcl|GPHN_38:8-2365_ORF1_GPHN_38:7:2364, XP_006515969.1 lcl|GPHN_3:8-2257_ORF1_GPHN_3:7:2256, XP_006515970.1 lcl|GPHN_1:8-2218_ORF1_GPHN_1:7:2217, XP_017170562.1, XP_017170563.1, XP_017170564.1, XP_017170565.1 lcl|GPHN_29:8-2323_ORF1_GPHN_…
FRNLAEDRSGI	FRNLAEDRSGI		31.44	1276.65	-1.2	426.558	19.96	NP_666077.2 lcl|GPHN_4:8-2326_ORF1_GPHN_4:7:2325, XP_006515962.1, XP_006515963.1, XP_006515964.1, XP_006515965.1, XP_006515966.1, XP_006515967.1, XP_006515968.1 lcl|GPHN_38:8-2365_ORF1_GPHN_38:7:2364, XP_006515969.1 lcl|GPHN_3:8-2257_ORF1_GPHN_3:7:2256, XP_006515970.1 lcl|GPHN_1:8-2218_ORF1_GPHN_1:7:2217, XP_017170562.1, XP_017170563.1, XP_017170564.1, XP_017170565.1 lcl|GPHN_29:8-2323_ORF1_GPHN_…
FRNLAEDRSGINLKDLVQDPS	FRNLAEDRSGINLKDLVQDPS		25.72	2386.22	-5.2	597.56	26.48	NP_666077.2 lcl|GPHN_4:8-2326_ORF1_GPHN_4:7:2325, XP_006515962.1, XP_006515963.1, XP_006515964.1, XP_006515965.1, XP_006515966.1, XP_006515967.1, XP_006515968.1 lcl|GPHN_38:8-2365_ORF1_GPHN_38:7:2364, XP_006515969.1 lcl|GPHN_3:8-2257_ORF1_GPHN_3:7:2256, XP_006515970.1 lcl|GPHN_1:8-2218_ORF1_GPHN_1:7:2217, XP_017170562.1, XP_017170563.1, XP_017170564.1, XP_017170565.1 lcl|GPHN_29:8-2323_ORF1_GPHN_…
FVVPALR	FVVPALR		25.41	800.491	-0.5	401.252	25.85	NP_666077.2 lcl|GPHN_4:8-2326_ORF1_GPHN_4:7:2325, XP_006515962.1, XP_006515963.1, XP_006515964.1, XP_006515965.1, XP_006515966.1, XP_006515967.1, XP_006515968.1 lcl|GPHN_38:8-2365_ORF1_GPHN_38:7:2364, XP_006515969.1 lcl|GPHN_3:8-2257_ORF1_GPHN_3:7:2256, XP_006515970.1 lcl|GPHN_1:8-2218_ORF1_GPHN_1:7:2217, XP_017170562.1, XP_017170563.1, XP_017170564.1, XP_017170565.1 lcl|GPHN_29:8-2323_ORF1_GPHN_…
GADAVVQVEDTELI	GADAVVQVEDTELI		21.57	1457.72	0.3	729.87	33.15	NP_666077.2 lcl|GPHN_4:8-2326_ORF1_GPHN_4:7:2325, XP_006515962.1, XP_006515963.1, XP_006515964.1, XP_006515965.1, XP_006515966.1, XP_006515967.1, XP_006515968.1 lcl|GPHN_38:8-2365_ORF1_GPHN_38:7:2364, XP_006515969.1 lcl|GPHN_3:8-2257_ORF1_GPHN_3:7:2256, XP_006515970.1 lcl|GPHN_1:8-2218_ORF1_GPHN_1:7:2217, XP_017170562.1, XP_017170563.1, XP_017170564.1, XP_017170565.1 lcl|GPHN_29:8-2323_ORF1_GPHN_…
GADAVVQVEDTELIR	GADAVVQVEDTELIR		39.27	1613.83	0.3	538.949	27.48	NP_666077.2 lcl|GPHN_4:8-2326_ORF1_GPHN_4:7:2325, XP_006515962.1, XP_006515963.1, XP_006515964.1, XP_006515965.1, XP_006515966.1, XP_006515967.1, XP_006515968.1 lcl|GPHN_38:8-2365_ORF1_GPHN_38:7:2364, XP_006515969.1 lcl|GPHN_3:8-2257_ORF1_GPHN_3:7:2256, XP_006515970.1 lcl|GPHN_1:8-2218_ORF1_GPHN_1:7:2217, XP_017170562.1, XP_017170563.1, XP_017170564.1, XP_017170565.1 lcl|GPHN_29:8-2323_ORF1_GPHN_…
GADAVVQVEDTELIRESDDGTEELEVR	GADAVVQVEDTELIRESDDGTEELEVR		49.88	2973.41	2.3	992.144	28.96	NP_666077.2 lcl|GPHN_4:8-2326_ORF1_GPHN_4:7:2325, XP_006515962.1, XP_006515963.1, XP_006515964.1, XP_006515965.1, XP_006515966.1, XP_006515967.1, XP_006515968.1 lcl|GPHN_38:8-2365_ORF1_GPHN_38:7:2364, XP_006515969.1 lcl|GPHN_3:8-2257_ORF1_GPHN_3:7:2256, XP_006515970.1 lcl|GPHN_1:8-2218_ORF1_GPHN_1:7:2217, XP_017170562.1, XP_017170563.1, XP_017170564.1, XP_017170565.1 lcl|GPHN_29:8-2323_ORF1_GPHN_…
GAPIPCGADA	GAPIPC(+57.02)GADA	C6:Carbamidomethylation:1000.00	23.6	927.412	0.3	464.713	21.99	NP_666077.2 lcl|GPHN_4:8-2326_ORF1_GPHN_4:7:2325, XP_006515962.1, XP_006515963.1, XP_006515964.1, XP_006515965.1, XP_006515966.1, XP_006515967.1, XP_006515968.1 lcl|GPHN_38:8-2365_ORF1_GPHN_38:7:2364, XP_006515969.1 lcl|GPHN_3:8-2257_ORF1_GPHN_3:7:2256, XP_006515970.1 lcl|GPHN_1:8-2218_ORF1_GPHN_1:7:2217, XP_017170562.1, XP_017170563.1, XP_017170564.1, XP_017170565.1 lcl|GPHN_29:8-2323_ORF1_GPHN_…
GAPIPCGADAV	GAPIPC(+57.02)GADAV	C6:Carbamidomethylation:1000.00	32.92	1026.48	1.8	1027.49	25.01	NP_666077.2 lcl|GPHN_4:8-2326_ORF1_GPHN_4:7:2325, XP_006515962.1, XP_006515963.1, XP_006515964.1, XP_006515965.1, XP_006515966.1, XP_006515967.1, XP_006515968.1 lcl|GPHN_38:8-2365_ORF1_GPHN_38:7:2364, XP_006515969.1 lcl|GPHN_3:8-2257_ORF1_GPHN_3:7:2256, XP_006515970.1 lcl|GPHN_1:8-2218_ORF1_GPHN_1:7:2217, XP_017170562.1, XP_017170563.1, XP_017170564.1, XP_017170565.1 lcl|GPHN_29:8-2323_ORF1_GPHN_…
GAPIPCGADAVVQVEDTELIRESDDGTEELEVR	GAPIPC(+57.02)GADAVVQVEDTELIRESDDGTEELEVR	C6:Carbamidomethylation:1000.00	23.66	3568.68	2.3	1190.57	31.07	NP_666077.2 lcl|GPHN_4:8-2326_ORF1_GPHN_4:7:2325, XP_006515962.1, XP_006515963.1, XP_006515964.1, XP_006515965.1, XP_006515966.1, XP_006515967.1, XP_006515968.1 lcl|GPHN_38:8-2365_ORF1_GPHN_38:7:2364, XP_006515969.1 lcl|GPHN_3:8-2257_ORF1_GPHN_3:7:2256, XP_006515970.1 lcl|GPHN_1:8-2218_ORF1_GPHN_1:7:2217, XP_017170562.1, XP_017170563.1, XP_017170564.1, XP_017170565.1 lcl|GPHN_29:8-2323_ORF1_GPHN_…
GATKEVIEREAPGMA	GATKEVIEREAPGM(+15.99)A	M14:Oxidation (M):1000.00	34.08	1573.78	0.7	787.896	17.49	XP_006515963.1, XP_006515964.1, XP_006515965.1, XP_006515966.1, XP_006515968.1 lcl|GPHN_38:8-2365_ORF1_GPHN_38:7:2364, XP_006515969.1 lcl|GPHN_3:8-2257_ORF1_GPHN_3:7:2256, XP_017170562.1, XP_017170563.1, XP_017170566.1, XP_017170568.1, XP_030102590.1 lcl|GPHN_41:8-2320_ORF1_GPHN_41:7:2319, XP_030102592.1, lcl|GPHN_100:8-925_ORF2_GPHN_100:7:924 lcl|GPHN_220:8-925_ORF2_GPHN_220:7:924, lcl|GPHN_107:…
GEKDYLK	GEKDYLK		22.98	851.439	5	426.729	16.63	NP_666077.2 lcl|GPHN_4:8-2326_ORF1_GPHN_4:7:2325, XP_006515962.1, XP_006515963.1, XP_006515964.1, XP_006515965.1, XP_006515966.1, XP_006515967.1, XP_006515968.1 lcl|GPHN_38:8-2365_ORF1_GPHN_38:7:2364, XP_006515969.1 lcl|GPHN_3:8-2257_ORF1_GPHN_3:7:2256, XP_006515970.1 lcl|GPHN_1:8-2218_ORF1_GPHN_1:7:2217, XP_017170562.1, XP_017170563.1, XP_017170564.1, XP_017170565.1 lcl|GPHN_29:8-2323_ORF1_GPHN_…
GEKDYLKQ	GEKDYLKQ		23.16	979.497	-0.8	490.756	14.84	NP_666077.2 lcl|GPHN_4:8-2326_ORF1_GPHN_4:7:2325, XP_006515962.1, XP_006515963.1, XP_006515964.1, XP_006515965.1, XP_006515966.1, XP_006515967.1, XP_006515968.1 lcl|GPHN_38:8-2365_ORF1_GPHN_38:7:2364, XP_006515969.1 lcl|GPHN_3:8-2257_ORF1_GPHN_3:7:2256, XP_006515970.1 lcl|GPHN_1:8-2218_ORF1_GPHN_1:7:2217, XP_017170562.1, XP_017170563.1, XP_017170564.1, XP_017170565.1 lcl|GPHN_29:8-2323_ORF1_GPHN_…
GEQLLNPEDDLLPG	GEQLLNPEDDLLPG		18.14	1508.74	0.5	755.375	34.54	lcl|GPHN_138:8-2026_ORF1_GPHN_138:7:2025, lcl|GPHN_277:8-2065_ORF1_GPHN_277:7:2064
GEQPTQTVMPGQVMRV	GEQPTQTVM(+15.99)PGQVM(+15.99)RV	M9:Oxidation (M):1000.00;M14:Oxidation (M):1000.00	24.51	1788.85	0.4	895.433	20.18	NP_666077.2 lcl|GPHN_4:8-2326_ORF1_GPHN_4:7:2325, XP_006515962.1, XP_006515963.1, XP_006515964.1, XP_006515965.1, XP_006515966.1, XP_006515967.1, XP_006515968.1 lcl|GPHN_38:8-2365_ORF1_GPHN_38:7:2364, XP_006515969.1 lcl|GPHN_3:8-2257_ORF1_GPHN_3:7:2256, XP_006515970.1 lcl|GPHN_1:8-2218_ORF1_GPHN_1:7:2217, XP_017170562.1, XP_017170563.1, XP_017170564.1, XP_017170565.1 lcl|GPHN_29:8-2323_ORF1_GPHN_…
GEVVDVM	GEVVDVM(+15.99)	M7:Oxidation (M):1000.00	21.91	763.342	4.6	764.353	25.46	NP_666077.2 lcl|GPHN_4:8-2326_ORF1_GPHN_4:7:2325, XP_006515962.1, XP_006515963.1, XP_006515964.1, XP_006515965.1, XP_006515966.1, XP_006515967.1, XP_006515968.1 lcl|GPHN_38:8-2365_ORF1_GPHN_38:7:2364, XP_006515969.1 lcl|GPHN_3:8-2257_ORF1_GPHN_3:7:2256, XP_006515970.1 lcl|GPHN_1:8-2218_ORF1_GPHN_1:7:2217, XP_017170562.1, XP_017170563.1, XP_017170564.1, XP_017170565.1 lcl|GPHN_29:8-2323_ORF1_GPHN_…
GEVVDVMVIG	GEVVDVMVIG		31.08	1016.52	-0.1	509.268	32.89	NP_666077.2 lcl|GPHN_4:8-2326_ORF1_GPHN_4:7:2325, XP_006515962.1, XP_006515963.1, XP_006515964.1, XP_006515965.1, XP_006515966.1, XP_006515967.1, XP_006515968.1 lcl|GPHN_38:8-2365_ORF1_GPHN_38:7:2364, XP_006515969.1 lcl|GPHN_3:8-2257_ORF1_GPHN_3:7:2256, XP_006515970.1 lcl|GPHN_1:8-2218_ORF1_GPHN_1:7:2217, XP_017170562.1, XP_017170563.1, XP_017170564.1, XP_017170565.1 lcl|GPHN_29:8-2323_ORF1_GPHN_…
GEVVDVMVIGR	GEVVDVMVIGR		40.38	1172.62	0.4	587.319	27.54	NP_666077.2 lcl|GPHN_4:8-2326_ORF1_GPHN_4:7:2325, XP_006515962.1, XP_006515963.1, XP_006515964.1, XP_006515965.1, XP_006515966.1, XP_006515967.1, XP_006515968.1 lcl|GPHN_38:8-2365_ORF1_GPHN_38:7:2364, XP_006515969.1 lcl|GPHN_3:8-2257_ORF1_GPHN_3:7:2256, XP_006515970.1 lcl|GPHN_1:8-2218_ORF1_GPHN_1:7:2217, XP_017170562.1, XP_017170563.1, XP_017170564.1, XP_017170565.1 lcl|GPHN_29:8-2323_ORF1_GPHN_…
GEVVDVMVIGR	GEVVDVM(+15.99)VIGR	M7:Oxidation (M):1000.00	35.71	1188.62	5.6	595.319	24.6	NP_666077.2 lcl|GPHN_4:8-2326_ORF1_GPHN_4:7:2325, XP_006515962.1, XP_006515963.1, XP_006515964.1, XP_006515965.1, XP_006515966.1, XP_006515967.1, XP_006515968.1 lcl|GPHN_38:8-2365_ORF1_GPHN_38:7:2364, XP_006515969.1 lcl|GPHN_3:8-2257_ORF1_GPHN_3:7:2256, XP_006515970.1 lcl|GPHN_1:8-2218_ORF1_GPHN_1:7:2217, XP_017170562.1, XP_017170563.1, XP_017170564.1, XP_017170565.1 lcl|GPHN_29:8-2323_ORF1_GPHN_…
GEVVDVMVIGRL	GEVVDVM(+15.99)VIGRL	M7:Oxidation (M):1000.00	36.15	1301.7	0.3	651.858	29.07	NP_666077.2 lcl|GPHN_4:8-2326_ORF1_GPHN_4:7:2325, XP_006515962.1, XP_006515963.1, XP_006515964.1, XP_006515965.1, XP_006515966.1, XP_006515967.1, XP_006515968.1 lcl|GPHN_38:8-2365_ORF1_GPHN_38:7:2364, XP_006515969.1 lcl|GPHN_3:8-2257_ORF1_GPHN_3:7:2256, XP_006515970.1 lcl|GPHN_1:8-2218_ORF1_GPHN_1:7:2217, XP_017170562.1, XP_017170563.1, XP_017170564.1, XP_017170565.1 lcl|GPHN_29:8-2323_ORF1_GPHN_…
GEVVDVMVIGRL	GEVVDVMVIGRL		35.34	1285.71	0.4	643.861	31.78	NP_666077.2 lcl|GPHN_4:8-2326_ORF1_GPHN_4:7:2325, XP_006515962.1, XP_006515963.1, XP_006515964.1, XP_006515965.1, XP_006515966.1, XP_006515967.1, XP_006515968.1 lcl|GPHN_38:8-2365_ORF1_GPHN_38:7:2364, XP_006515969.1 lcl|GPHN_3:8-2257_ORF1_GPHN_3:7:2256, XP_006515970.1 lcl|GPHN_1:8-2218_ORF1_GPHN_1:7:2217, XP_017170562.1, XP_017170563.1, XP_017170564.1, XP_017170565.1 lcl|GPHN_29:8-2323_ORF1_GPHN_…
GFAPRDVTPE	GFAPRDVTPE		28.05	1087.53	0.1	544.772	21.13	NP_666077.2 lcl|GPHN_4:8-2326_ORF1_GPHN_4:7:2325, XP_006515962.1, XP_006515963.1, XP_006515964.1, XP_006515965.1, XP_006515966.1, XP_006515967.1, XP_006515968.1 lcl|GPHN_38:8-2365_ORF1_GPHN_38:7:2364, XP_006515969.1 lcl|GPHN_3:8-2257_ORF1_GPHN_3:7:2256, XP_006515970.1 lcl|GPHN_1:8-2218_ORF1_GPHN_1:7:2217, XP_017170562.1, XP_017170563.1, XP_017170564.1, XP_017170565.1 lcl|GPHN_29:8-2323_ORF1_GPHN_…
GFAPRDVTPEAT	GFAPRDVTPEAT		41.37	1259.61	-0.8	630.814	21.69	NP_666077.2 lcl|GPHN_4:8-2326_ORF1_GPHN_4:7:2325, XP_006515962.1, XP_006515967.1, XP_006515970.1 lcl|GPHN_1:8-2218_ORF1_GPHN_1:7:2217, XP_017170564.1, XP_017170565.1 lcl|GPHN_29:8-2323_ORF1_GPHN_29:7:2322, XP_017170567.1, XP_030102591.1 lcl|GPHN_8:8-2281_ORF1_GPHN_8:7:2280, XP_030102593.1 lcl|GPHN_2:8-1945_ORF1_GPHN_2:7:1944, lcl|GPHN_101:8-994_ORF2_GPHN_101:7:993, lcl|GPHN_102:8-943_ORF2_GPHN_10…
GFAPRDVTPEATK	GFAPRDVTPEATK		34.24	1387.71	-0.4	463.577	18.64	NP_666077.2 lcl|GPHN_4:8-2326_ORF1_GPHN_4:7:2325, XP_006515962.1, XP_006515967.1, XP_006515970.1 lcl|GPHN_1:8-2218_ORF1_GPHN_1:7:2217, XP_017170564.1, XP_017170565.1 lcl|GPHN_29:8-2323_ORF1_GPHN_29:7:2322, XP_017170567.1, XP_030102591.1 lcl|GPHN_8:8-2281_ORF1_GPHN_8:7:2280, XP_030102593.1 lcl|GPHN_2:8-1945_ORF1_GPHN_2:7:1944, lcl|GPHN_101:8-994_ORF2_GPHN_101:7:993, lcl|GPHN_102:8-943_ORF2_GPHN_10…
GFAPRDVTPEATKE	GFAPRDVTPEATKE		26.1	1516.75	-0.8	506.591	19.23	NP_666077.2 lcl|GPHN_4:8-2326_ORF1_GPHN_4:7:2325, XP_006515962.1, XP_006515967.1, XP_006515970.1 lcl|GPHN_1:8-2218_ORF1_GPHN_1:7:2217, XP_017170564.1, XP_017170565.1 lcl|GPHN_29:8-2323_ORF1_GPHN_29:7:2322, XP_017170567.1, XP_030102591.1 lcl|GPHN_8:8-2281_ORF1_GPHN_8:7:2280, XP_030102593.1 lcl|GPHN_2:8-1945_ORF1_GPHN_2:7:1944, lcl|GPHN_101:8-994_ORF2_GPHN_101:7:993, lcl|GPHN_102:8-943_ORF2_GPHN_10…
GFAPRDVTPEATKEVIEREAPG	GFAPRDVTPEATKEVIEREAPG		45.94	2368.2	1	593.058	24.15	NP_666077.2 lcl|GPHN_4:8-2326_ORF1_GPHN_4:7:2325, XP_006515962.1, XP_006515967.1, XP_006515970.1 lcl|GPHN_1:8-2218_ORF1_GPHN_1:7:2217, XP_017170564.1, XP_017170565.1 lcl|GPHN_29:8-2323_ORF1_GPHN_29:7:2322, XP_017170567.1, XP_030102591.1 lcl|GPHN_8:8-2281_ORF1_GPHN_8:7:2280, XP_030102593.1 lcl|GPHN_2:8-1945_ORF1_GPHN_2:7:1944, lcl|GPHN_101:8-994_ORF2_GPHN_101:7:993, lcl|GPHN_102:8-943_ORF2_GPHN_10…
GFAPRDVTPEATKEVIEREAPGMA	GFAPRDVTPEATKEVIEREAPGM(+15.99)A	M23:Oxidation (M):1000.00	46.65	2586.27	1.7	647.577	24.35	NP_666077.2 lcl|GPHN_4:8-2326_ORF1_GPHN_4:7:2325, XP_006515962.1, XP_006515967.1, XP_006515970.1 lcl|GPHN_1:8-2218_ORF1_GPHN_1:7:2217, XP_017170564.1, XP_017170565.1 lcl|GPHN_29:8-2323_ORF1_GPHN_29:7:2322, XP_017170567.1, XP_030102591.1 lcl|GPHN_8:8-2281_ORF1_GPHN_8:7:2280, XP_030102593.1 lcl|GPHN_2:8-1945_ORF1_GPHN_2:7:1944, lcl|GPHN_101:8-994_ORF2_GPHN_101:7:993, lcl|GPHN_102:8-943_ORF2_GPHN_10…
GGTGFAPR	GGTGFAPR		26.28	761.382	-7	381.696	15.97	NP_666077.2 lcl|GPHN_4:8-2326_ORF1_GPHN_4:7:2325, XP_006515962.1, XP_006515963.1, XP_006515964.1, XP_006515965.1, XP_006515966.1, XP_006515967.1, XP_006515968.1 lcl|GPHN_38:8-2365_ORF1_GPHN_38:7:2364, XP_006515969.1 lcl|GPHN_3:8-2257_ORF1_GPHN_3:7:2256, XP_006515970.1 lcl|GPHN_1:8-2218_ORF1_GPHN_1:7:2217, XP_017170562.1, XP_017170563.1, XP_017170564.1, XP_017170565.1 lcl|GPHN_29:8-2323_ORF1_GPHN_…
GGTGFAPRDV	GGTGFAPRDV		25.62	975.477	-0.2	488.746	20.12	NP_666077.2 lcl|GPHN_4:8-2326_ORF1_GPHN_4:7:2325, XP_006515962.1, XP_006515963.1, XP_006515964.1, XP_006515965.1, XP_006515966.1, XP_006515967.1, XP_006515968.1 lcl|GPHN_38:8-2365_ORF1_GPHN_38:7:2364, XP_006515969.1 lcl|GPHN_3:8-2257_ORF1_GPHN_3:7:2256, XP_006515970.1 lcl|GPHN_1:8-2218_ORF1_GPHN_1:7:2217, XP_017170562.1, XP_017170563.1, XP_017170564.1, XP_017170565.1 lcl|GPHN_29:8-2323_ORF1_GPHN_…
GGTGFAPRDVTPEAT	GGTGFAPRDVTPEAT		44.85	1474.71	2	738.361	22.01	NP_666077.2 lcl|GPHN_4:8-2326_ORF1_GPHN_4:7:2325, XP_006515962.1, XP_006515967.1, XP_006515970.1 lcl|GPHN_1:8-2218_ORF1_GPHN_1:7:2217, XP_017170564.1, XP_017170565.1 lcl|GPHN_29:8-2323_ORF1_GPHN_29:7:2322, XP_017170567.1, XP_030102591.1 lcl|GPHN_8:8-2281_ORF1_GPHN_8:7:2280, XP_030102593.1 lcl|GPHN_2:8-1945_ORF1_GPHN_2:7:1944, lcl|GPHN_101:8-994_ORF2_GPHN_101:7:993, lcl|GPHN_102:8-943_ORF2_GPHN_10…
GGTGFAPRDVTPEATKEVIER	GGTGFAPRDVTPEATKEVIER		40.42	2229.14	0	558.292	22.15	NP_666077.2 lcl|GPHN_4:8-2326_ORF1_GPHN_4:7:2325, XP_006515962.1, XP_006515967.1, XP_006515970.1 lcl|GPHN_1:8-2218_ORF1_GPHN_1:7:2217, XP_017170564.1, XP_017170565.1 lcl|GPHN_29:8-2323_ORF1_GPHN_29:7:2322, XP_017170567.1, XP_030102591.1 lcl|GPHN_8:8-2281_ORF1_GPHN_8:7:2280, XP_030102593.1 lcl|GPHN_2:8-1945_ORF1_GPHN_2:7:1944, lcl|GPHN_101:8-994_ORF2_GPHN_101:7:993, lcl|GPHN_102:8-943_ORF2_GPHN_10…
GGTGFAPRDVTPEATKEVIEREAPG	GGTGFAPRDVTPEATKEVIEREAPG		44.21	2583.29	1.3	862.106	24.34	NP_666077.2 lcl|GPHN_4:8-2326_ORF1_GPHN_4:7:2325, XP_006515962.1, XP_006515967.1, XP_006515970.1 lcl|GPHN_1:8-2218_ORF1_GPHN_1:7:2217, XP_017170564.1, XP_017170565.1 lcl|GPHN_29:8-2323_ORF1_GPHN_29:7:2322, XP_017170567.1, XP_030102591.1 lcl|GPHN_8:8-2281_ORF1_GPHN_8:7:2280, XP_030102593.1 lcl|GPHN_2:8-1945_ORF1_GPHN_2:7:1944, lcl|GPHN_101:8-994_ORF2_GPHN_101:7:993, lcl|GPHN_102:8-943_ORF2_GPHN_10…
GGTGFAPRDVTPEATKEVIEREAPGMA	GGTGFAPRDVTPEATKEVIEREAPGM(+15.99)A	M26:Oxidation (M):1000.00	47.99	2801.37	0.5	934.796	24.49	NP_666077.2 lcl|GPHN_4:8-2326_ORF1_GPHN_4:7:2325, XP_006515962.1, XP_006515967.1, XP_006515970.1 lcl|GPHN_1:8-2218_ORF1_GPHN_1:7:2217, XP_017170564.1, XP_017170565.1 lcl|GPHN_29:8-2323_ORF1_GPHN_29:7:2322, XP_017170567.1, XP_030102591.1 lcl|GPHN_8:8-2281_ORF1_GPHN_8:7:2280, XP_030102593.1 lcl|GPHN_2:8-1945_ORF1_GPHN_2:7:1944, lcl|GPHN_101:8-994_ORF2_GPHN_101:7:993, lcl|GPHN_102:8-943_ORF2_GPHN_10…
GGTGFAPRDVTPEATKEVIEREAPGMA	GGTGFAPRDVTPEATKEVIEREAPGMA		47.31	2785.37	0.2	697.35	26.02	NP_666077.2 lcl|GPHN_4:8-2326_ORF1_GPHN_4:7:2325, XP_006515962.1, XP_006515967.1, XP_006515970.1 lcl|GPHN_1:8-2218_ORF1_GPHN_1:7:2217, XP_017170564.1, XP_017170565.1 lcl|GPHN_29:8-2323_ORF1_GPHN_29:7:2322, XP_017170567.1, XP_030102591.1 lcl|GPHN_8:8-2281_ORF1_GPHN_8:7:2280, XP_030102593.1 lcl|GPHN_2:8-1945_ORF1_GPHN_2:7:1944, lcl|GPHN_101:8-994_ORF2_GPHN_101:7:993, lcl|GPHN_102:8-943_ORF2_GPHN_10…
GGVSMGEKDY	GGVSM(+15.99)GEKDY	M5:Oxidation (M):1000.00	31.68	1057.44	1.2	529.727	15.07	NP_666077.2 lcl|GPHN_4:8-2326_ORF1_GPHN_4:7:2325, XP_006515962.1, XP_006515963.1, XP_006515964.1, XP_006515965.1, XP_006515966.1, XP_006515967.1, XP_006515968.1 lcl|GPHN_38:8-2365_ORF1_GPHN_38:7:2364, XP_006515969.1 lcl|GPHN_3:8-2257_ORF1_GPHN_3:7:2256, XP_006515970.1 lcl|GPHN_1:8-2218_ORF1_GPHN_1:7:2217, XP_017170562.1, XP_017170563.1, XP_017170564.1, XP_017170565.1 lcl|GPHN_29:8-2323_ORF1_GPHN_…
GGVSMGEKDYLK	GGVSM(+15.99)GEKDYLK	M5:Oxidation (M):1000.00	27.03	1298.62	1.6	650.317	16.61	NP_666077.2 lcl|GPHN_4:8-2326_ORF1_GPHN_4:7:2325, XP_006515962.1, XP_006515963.1, XP_006515964.1, XP_006515965.1, XP_006515966.1, XP_006515967.1, XP_006515968.1 lcl|GPHN_38:8-2365_ORF1_GPHN_38:7:2364, XP_006515969.1 lcl|GPHN_3:8-2257_ORF1_GPHN_3:7:2256, XP_006515970.1 lcl|GPHN_1:8-2218_ORF1_GPHN_1:7:2217, XP_017170562.1, XP_017170563.1, XP_017170564.1, XP_017170565.1 lcl|GPHN_29:8-2323_ORF1_GPHN_…
GGVSMGEKDYLKQ	GGVSM(+15.99)GEKDYLKQ	M5:Oxidation (M):1000.00	18.44	1426.68	3.6	714.348	17.05	NP_666077.2 lcl|GPHN_4:8-2326_ORF1_GPHN_4:7:2325, XP_006515962.1, XP_006515963.1, XP_006515964.1, XP_006515965.1, XP_006515966.1, XP_006515967.1, XP_006515968.1 lcl|GPHN_38:8-2365_ORF1_GPHN_38:7:2364, XP_006515969.1 lcl|GPHN_3:8-2257_ORF1_GPHN_3:7:2256, XP_006515970.1 lcl|GPHN_1:8-2218_ORF1_GPHN_1:7:2217, XP_017170562.1, XP_017170563.1, XP_017170564.1, XP_017170565.1 lcl|GPHN_29:8-2323_ORF1_GPHN_…
GHDIKRGECV	GHDIKRGEC(+57.02)V	C9:Carbamidomethylation:1000.00	32.04	1169.56	-0.3	585.788	12.64	NP_666077.2 lcl|GPHN_4:8-2326_ORF1_GPHN_4:7:2325, XP_006515962.1, XP_006515963.1, XP_006515964.1, XP_006515965.1, XP_006515966.1, XP_006515967.1, XP_006515968.1 lcl|GPHN_38:8-2365_ORF1_GPHN_38:7:2364, XP_006515969.1 lcl|GPHN_3:8-2257_ORF1_GPHN_3:7:2256, XP_006515970.1 lcl|GPHN_1:8-2218_ORF1_GPHN_1:7:2217, XP_017170562.1, XP_017170563.1, XP_017170564.1, XP_017170565.1 lcl|GPHN_29:8-2323_ORF1_GPHN_…
GHDIKRGECVL	GHDIKRGEC(+57.02)VL	C9:Carbamidomethylation:1000.00	34.63	1282.65	1.3	642.331	16.05	NP_666077.2 lcl|GPHN_4:8-2326_ORF1_GPHN_4:7:2325, XP_006515962.1, XP_006515963.1, XP_006515964.1, XP_006515965.1, XP_006515966.1, XP_006515967.1, XP_006515968.1 lcl|GPHN_38:8-2365_ORF1_GPHN_38:7:2364, XP_006515969.1 lcl|GPHN_3:8-2257_ORF1_GPHN_3:7:2256, XP_006515970.1 lcl|GPHN_1:8-2218_ORF1_GPHN_1:7:2217, XP_017170562.1, XP_017170563.1, XP_017170564.1, XP_017170565.1 lcl|GPHN_29:8-2323_ORF1_GPHN_…
GHDIKRGECVLA	GHDIKRGEC(+57.02)VLA	C9:Carbamidomethylation:1000.00	35.4	1353.68	1.7	677.85	15.91	NP_666077.2 lcl|GPHN_4:8-2326_ORF1_GPHN_4:7:2325, XP_006515962.1, XP_006515963.1, XP_006515964.1, XP_006515965.1, XP_006515966.1, XP_006515967.1, XP_006515968.1 lcl|GPHN_38:8-2365_ORF1_GPHN_38:7:2364, XP_006515969.1 lcl|GPHN_3:8-2257_ORF1_GPHN_3:7:2256, XP_006515970.1 lcl|GPHN_1:8-2218_ORF1_GPHN_1:7:2217, XP_017170562.1, XP_017170563.1, XP_017170564.1, XP_017170565.1 lcl|GPHN_29:8-2323_ORF1_GPHN_…
GHDIKRGECVLAKGT	GHDIKRGECVLAKGT		25.94	1582.83	7.2	396.716	15.94	NP_666077.2 lcl|GPHN_4:8-2326_ORF1_GPHN_4:7:2325, XP_006515962.1, XP_006515963.1, XP_006515964.1, XP_006515965.1, XP_006515966.1, XP_006515967.1, XP_006515968.1 lcl|GPHN_38:8-2365_ORF1_GPHN_38:7:2364, XP_006515969.1 lcl|GPHN_3:8-2257_ORF1_GPHN_3:7:2256, XP_006515970.1 lcl|GPHN_1:8-2218_ORF1_GPHN_1:7:2217, XP_017170562.1, XP_017170563.1, XP_017170564.1, XP_017170565.1 lcl|GPHN_29:8-2323_ORF1_GPHN_…
GHSAVDIT	G(+42.01)HSAVDIT	G1:Acetylation (Protein N-term):1000.00	22.16	840.398	2.7	421.207	19.25	lcl|GPHN_134:8-1051_ORF1_GPHN_134:7:1050, lcl|GPHN_161:8-1156_ORF1_GPHN_161:7:1155, lcl|GPHN_171:8-2365_ORF1_GPHN_171:7:2364, lcl|GPHN_217:8-2395_ORF1_GPHN_217:7:2394, lcl|GPHN_247:8-544_ORF2_GPHN_247:7:543, lcl|GPHN_272:8-2146_ORF1_GPHN_272:7:2145, lcl|GPHN_273:8-2419_ORF1_GPHN_273:7:2418, lcl|GPHN_276:8-2296_ORF1_GPHN_276:7:2295, lcl|GPHN_5:8-1375_ORF1_GPHN_5:7:1374, lcl|GPHN_63:8-1984_ORF1_GPH…
GILDPRPT	GILDPRPT		23	867.481	0.5	434.748	21.75	NP_666077.2 lcl|GPHN_4:8-2326_ORF1_GPHN_4:7:2325, XP_006515962.1, XP_006515963.1, XP_006515964.1, XP_006515965.1, XP_006515966.1, XP_006515967.1, XP_006515968.1 lcl|GPHN_38:8-2365_ORF1_GPHN_38:7:2364, XP_006515969.1 lcl|GPHN_3:8-2257_ORF1_GPHN_3:7:2256, XP_006515970.1 lcl|GPHN_1:8-2218_ORF1_GPHN_1:7:2217, XP_017170562.1, XP_017170563.1, XP_017170564.1, XP_017170565.1 lcl|GPHN_29:8-2323_ORF1_GPHN_…
GILDPRPTI	GILDPRPTI		22.87	980.565	-0.4	491.29	26.2	NP_666077.2 lcl|GPHN_4:8-2326_ORF1_GPHN_4:7:2325, XP_006515962.1, XP_006515963.1, XP_006515964.1, XP_006515965.1, XP_006515966.1, XP_006515967.1, XP_006515968.1 lcl|GPHN_38:8-2365_ORF1_GPHN_38:7:2364, XP_006515969.1 lcl|GPHN_3:8-2257_ORF1_GPHN_3:7:2256, XP_006515970.1 lcl|GPHN_1:8-2218_ORF1_GPHN_1:7:2217, XP_017170562.1, XP_017170563.1, XP_017170564.1, XP_017170565.1 lcl|GPHN_29:8-2323_ORF1_GPHN_…
GILDPRPTII	GILDPRPTII		27.63	1093.65	-0.5	547.832	29.23	NP_666077.2 lcl|GPHN_4:8-2326_ORF1_GPHN_4:7:2325, XP_006515962.1, XP_006515963.1, XP_006515964.1, XP_006515965.1, XP_006515966.1, XP_006515967.1, XP_006515968.1 lcl|GPHN_38:8-2365_ORF1_GPHN_38:7:2364, XP_006515969.1 lcl|GPHN_3:8-2257_ORF1_GPHN_3:7:2256, XP_006515970.1 lcl|GPHN_1:8-2218_ORF1_GPHN_1:7:2217, XP_017170562.1, XP_017170563.1, XP_017170564.1, XP_017170565.1 lcl|GPHN_29:8-2323_ORF1_GPHN_…
GILDPRPTIIK	GILDPRPTIIK		31.69	1221.74	1.9	611.881	23.8	NP_666077.2 lcl|GPHN_4:8-2326_ORF1_GPHN_4:7:2325, XP_006515962.1, XP_006515963.1, XP_006515964.1, XP_006515965.1, XP_006515966.1, XP_006515967.1, XP_006515968.1 lcl|GPHN_38:8-2365_ORF1_GPHN_38:7:2364, XP_006515969.1 lcl|GPHN_3:8-2257_ORF1_GPHN_3:7:2256, XP_006515970.1 lcl|GPHN_1:8-2218_ORF1_GPHN_1:7:2217, XP_017170562.1, XP_017170563.1, XP_017170564.1, XP_017170565.1 lcl|GPHN_29:8-2323_ORF1_GPHN_…
GINLKDLVQ	GINLKDLVQ		23.48	998.576	-0.6	500.295	27.54	NP_666077.2 lcl|GPHN_4:8-2326_ORF1_GPHN_4:7:2325, XP_006515962.1, XP_006515963.1, XP_006515964.1, XP_006515965.1, XP_006515966.1, XP_006515967.1, XP_006515968.1 lcl|GPHN_38:8-2365_ORF1_GPHN_38:7:2364, XP_006515969.1 lcl|GPHN_3:8-2257_ORF1_GPHN_3:7:2256, XP_006515970.1 lcl|GPHN_1:8-2218_ORF1_GPHN_1:7:2217, XP_017170562.1, XP_017170563.1, XP_017170564.1, XP_017170565.1 lcl|GPHN_29:8-2323_ORF1_GPHN_…
GINLKDLVQD	GINLKDLVQD		26.08	1113.6	0.7	557.809	27.91	NP_666077.2 lcl|GPHN_4:8-2326_ORF1_GPHN_4:7:2325, XP_006515962.1, XP_006515963.1, XP_006515964.1, XP_006515965.1, XP_006515966.1, XP_006515967.1, XP_006515968.1 lcl|GPHN_38:8-2365_ORF1_GPHN_38:7:2364, XP_006515969.1 lcl|GPHN_3:8-2257_ORF1_GPHN_3:7:2256, XP_006515970.1 lcl|GPHN_1:8-2218_ORF1_GPHN_1:7:2217, XP_017170562.1, XP_017170563.1, XP_017170564.1, XP_017170565.1 lcl|GPHN_29:8-2323_ORF1_GPHN_…
GINLKDLVQDPS	GINLKDLVQDPS		38.61	1297.69	-1.5	649.85	28.14	NP_666077.2 lcl|GPHN_4:8-2326_ORF1_GPHN_4:7:2325, XP_006515962.1, XP_006515963.1, XP_006515964.1, XP_006515965.1, XP_006515966.1, XP_006515967.1, XP_006515968.1 lcl|GPHN_38:8-2365_ORF1_GPHN_38:7:2364, XP_006515969.1 lcl|GPHN_3:8-2257_ORF1_GPHN_3:7:2256, XP_006515970.1 lcl|GPHN_1:8-2218_ORF1_GPHN_1:7:2217, XP_017170562.1, XP_017170563.1, XP_017170564.1, XP_017170565.1 lcl|GPHN_29:8-2323_ORF1_GPHN_…
GINLKDLVQDPSLL	GINLKDLVQDPSLL		35.77	1523.86	2.1	762.937	33.95	NP_666077.2 lcl|GPHN_4:8-2326_ORF1_GPHN_4:7:2325, XP_006515962.1, XP_006515963.1, XP_006515964.1, XP_006515965.1, XP_006515966.1, XP_006515967.1, XP_006515968.1 lcl|GPHN_38:8-2365_ORF1_GPHN_38:7:2364, XP_006515969.1 lcl|GPHN_3:8-2257_ORF1_GPHN_3:7:2256, XP_006515970.1 lcl|GPHN_1:8-2218_ORF1_GPHN_1:7:2217, XP_017170562.1, XP_017170563.1, XP_017170564.1, XP_017170565.1 lcl|GPHN_29:8-2323_ORF1_GPHN_…
GINLKDLVQDPSLLGGTIS	GINLKDLVQDPSLLGGTIS		22.04	1939.06	0.6	647.362	34.93	NP_666077.2 lcl|GPHN_4:8-2326_ORF1_GPHN_4:7:2325, XP_006515962.1, XP_006515963.1, XP_006515964.1, XP_006515965.1, XP_006515966.1, XP_006515967.1, XP_006515968.1 lcl|GPHN_38:8-2365_ORF1_GPHN_38:7:2364, XP_006515969.1 lcl|GPHN_3:8-2257_ORF1_GPHN_3:7:2256, XP_006515970.1 lcl|GPHN_1:8-2218_ORF1_GPHN_1:7:2217, XP_017170562.1, XP_017170563.1, XP_017170564.1, XP_017170565.1 lcl|GPHN_29:8-2323_ORF1_GPHN_…
GIVGDNPDDLL	GIVGDNPDDLL		23.54	1126.55	0.1	564.283	32.84	NP_666077.2 lcl|GPHN_4:8-2326_ORF1_GPHN_4:7:2325, XP_006515962.1, XP_006515963.1, XP_006515964.1, XP_006515965.1, XP_006515966.1, XP_006515967.1, XP_006515968.1 lcl|GPHN_38:8-2365_ORF1_GPHN_38:7:2364, XP_006515969.1 lcl|GPHN_3:8-2257_ORF1_GPHN_3:7:2256, XP_006515970.1 lcl|GPHN_1:8-2218_ORF1_GPHN_1:7:2217, XP_017170562.1, XP_017170563.1, XP_017170564.1, XP_017170565.1 lcl|GPHN_29:8-2323_ORF1_GPHN_…
GIVGDNPDDLLNA	GIVGDNPDDLLNA		21.59	1311.63	0.4	656.823	32.06	NP_666077.2 lcl|GPHN_4:8-2326_ORF1_GPHN_4:7:2325, XP_006515962.1, XP_006515963.1, XP_006515964.1, XP_006515965.1, XP_006515966.1, XP_006515967.1, XP_006515968.1 lcl|GPHN_38:8-2365_ORF1_GPHN_38:7:2364, XP_006515969.1 lcl|GPHN_3:8-2257_ORF1_GPHN_3:7:2256, XP_006515970.1 lcl|GPHN_1:8-2218_ORF1_GPHN_1:7:2217, XP_017170562.1, XP_017170563.1, XP_017170564.1, XP_017170565.1 lcl|GPHN_29:8-2323_ORF1_GPHN_…
GIVGDNPDDLLNAL	GIVGDNPDDLLNAL		26.76	1424.71	3.6	713.367	37.7	NP_666077.2 lcl|GPHN_4:8-2326_ORF1_GPHN_4:7:2325, XP_006515962.1, XP_006515963.1, XP_006515964.1, XP_006515965.1, XP_006515966.1, XP_006515967.1, XP_006515968.1 lcl|GPHN_38:8-2365_ORF1_GPHN_38:7:2364, XP_006515969.1 lcl|GPHN_3:8-2257_ORF1_GPHN_3:7:2256, XP_006515970.1 lcl|GPHN_1:8-2218_ORF1_GPHN_1:7:2217, XP_017170562.1, XP_017170563.1, XP_017170564.1, XP_017170565.1 lcl|GPHN_29:8-2323_ORF1_GPHN_…
GIVGDNPDDLLNALNEGI	GIVGDNPDDLLNALNEGI		29.37	1837.91	1.6	919.962	39.21	NP_666077.2 lcl|GPHN_4:8-2326_ORF1_GPHN_4:7:2325, XP_006515962.1, XP_006515963.1, XP_006515964.1, XP_006515965.1, XP_006515966.1, XP_006515967.1, XP_006515968.1 lcl|GPHN_38:8-2365_ORF1_GPHN_38:7:2364, XP_006515969.1 lcl|GPHN_3:8-2257_ORF1_GPHN_3:7:2256, XP_006515970.1 lcl|GPHN_1:8-2218_ORF1_GPHN_1:7:2217, XP_017170562.1, XP_017170563.1, XP_017170564.1, XP_017170565.1 lcl|GPHN_29:8-2323_ORF1_GPHN_…
GIVGDNPDDLLNALNEGIS	GIVGDNPDDLLNALNEGIS		18.19	1924.94	3	963.479	38.87	NP_666077.2 lcl|GPHN_4:8-2326_ORF1_GPHN_4:7:2325, XP_006515962.1, XP_006515963.1, XP_006515964.1, XP_006515965.1, XP_006515966.1, XP_006515967.1, XP_006515968.1 lcl|GPHN_38:8-2365_ORF1_GPHN_38:7:2364, XP_006515969.1 lcl|GPHN_3:8-2257_ORF1_GPHN_3:7:2256, XP_006515970.1 lcl|GPHN_1:8-2218_ORF1_GPHN_1:7:2217, XP_017170562.1, XP_017170563.1, XP_017170564.1, XP_017170565.1 lcl|GPHN_29:8-2323_ORF1_GPHN_…
GIVGDNPDDLLNALNEGISR	GIVGDNPDDLLNALNEGISR		44.89	2081.04	-0.1	1041.53	34.77	NP_666077.2 lcl|GPHN_4:8-2326_ORF1_GPHN_4:7:2325, XP_006515962.1, XP_006515963.1, XP_006515964.1, XP_006515965.1, XP_006515966.1, XP_006515967.1, XP_006515968.1 lcl|GPHN_38:8-2365_ORF1_GPHN_38:7:2364, XP_006515969.1 lcl|GPHN_3:8-2257_ORF1_GPHN_3:7:2256, XP_006515970.1 lcl|GPHN_1:8-2218_ORF1_GPHN_1:7:2217, XP_017170562.1, XP_017170563.1, XP_017170564.1, XP_017170565.1 lcl|GPHN_29:8-2323_ORF1_GPHN_…
GIVGDNPDDLLNALNEGISRA	GIVGDNPDDLLNALNEGISRA		36.99	2152.08	0.7	718.366	35.71	NP_666077.2 lcl|GPHN_4:8-2326_ORF1_GPHN_4:7:2325, XP_006515962.1, XP_006515963.1, XP_006515964.1, XP_006515965.1, XP_006515966.1, XP_006515967.1, XP_006515968.1 lcl|GPHN_38:8-2365_ORF1_GPHN_38:7:2364, XP_006515969.1 lcl|GPHN_3:8-2257_ORF1_GPHN_3:7:2256, XP_006515970.1 lcl|GPHN_1:8-2218_ORF1_GPHN_1:7:2217, XP_017170562.1, XP_017170563.1, XP_017170564.1, XP_017170565.1 lcl|GPHN_29:8-2323_ORF1_GPHN_…
GKTLIIN	GKTLIIN		18.25	757.47	1	758.478	19.53	NP_666077.2 lcl|GPHN_4:8-2326_ORF1_GPHN_4:7:2325, XP_006515962.1, XP_006515963.1, XP_006515964.1, XP_006515965.1, XP_006515966.1, XP_006515967.1, XP_006515968.1 lcl|GPHN_38:8-2365_ORF1_GPHN_38:7:2364, XP_006515969.1 lcl|GPHN_3:8-2257_ORF1_GPHN_3:7:2256, XP_006515970.1 lcl|GPHN_1:8-2218_ORF1_GPHN_1:7:2217, XP_017170562.1, XP_017170563.1, XP_017170564.1, XP_017170565.1 lcl|GPHN_29:8-2323_ORF1_GPHN_…
GKTLIINLPGSK	GKTLIINLPGSK		37.25	1239.76	0	620.885	23.21	NP_666077.2 lcl|GPHN_4:8-2326_ORF1_GPHN_4:7:2325, XP_006515962.1, XP_006515963.1, XP_006515964.1, XP_006515965.1, XP_006515966.1, XP_006515967.1, XP_006515968.1 lcl|GPHN_38:8-2365_ORF1_GPHN_38:7:2364, XP_006515969.1 lcl|GPHN_3:8-2257_ORF1_GPHN_3:7:2256, XP_006515970.1 lcl|GPHN_1:8-2218_ORF1_GPHN_1:7:2217, XP_017170562.1, XP_017170563.1, XP_017170564.1, XP_017170565.1 lcl|GPHN_29:8-2323_ORF1_GPHN_…
GKTLIINLPGSKK	GKTLIINLPGSKK		20.67	1367.85	-0.2	456.957	19.93	NP_666077.2 lcl|GPHN_4:8-2326_ORF1_GPHN_4:7:2325, XP_006515962.1, XP_006515963.1, XP_006515964.1, XP_006515965.1, XP_006515966.1, XP_006515967.1, XP_006515968.1 lcl|GPHN_38:8-2365_ORF1_GPHN_38:7:2364, XP_006515969.1 lcl|GPHN_3:8-2257_ORF1_GPHN_3:7:2256, XP_006515970.1 lcl|GPHN_1:8-2218_ORF1_GPHN_1:7:2217, XP_017170562.1, XP_017170563.1, XP_017170564.1, XP_017170565.1 lcl|GPHN_29:8-2323_ORF1_GPHN_…
GLKDELWR	GLKDELWR		25.2	1015.54	1.2	508.78	22.65	XP_006515962.1, XP_006515963.1, XP_006515964.1, XP_006515966.1, XP_006515967.1, XP_017170562.1, XP_017170563.1, XP_017170565.1 lcl|GPHN_29:8-2323_ORF1_GPHN_29:7:2322, XP_017170568.1, XP_030102590.1 lcl|GPHN_41:8-2320_ORF1_GPHN_41:7:2319, XP_030102591.1 lcl|GPHN_8:8-2281_ORF1_GPHN_8:7:2280, XP_030102592.1, lcl|GPHN_103:8-2287_ORF1_GPHN_103:7:2286, lcl|GPHN_106:8-1873_ORF1_GPHN_106:7:1872, lcl|GPHN…
GLKDELWRN	GLKDELWRN		28.66	1129.59	-0.3	565.801	22.4	XP_006515962.1, XP_006515963.1, XP_006515964.1, XP_006515966.1, XP_006515967.1, XP_017170562.1, XP_017170563.1, XP_017170565.1 lcl|GPHN_29:8-2323_ORF1_GPHN_29:7:2322, XP_017170568.1, XP_030102590.1 lcl|GPHN_41:8-2320_ORF1_GPHN_41:7:2319, XP_030102591.1 lcl|GPHN_8:8-2281_ORF1_GPHN_8:7:2280, XP_030102592.1, lcl|GPHN_103:8-2287_ORF1_GPHN_103:7:2286, lcl|GPHN_106:8-1873_ORF1_GPHN_106:7:1872, lcl|GPHN…
GLKDELWRNR	GLKDELWRNR		22.7	1285.69	-0.1	429.57	20.55	XP_006515962.1, XP_006515963.1, XP_006515964.1, XP_006515966.1, XP_006515967.1, XP_017170562.1, XP_017170563.1, XP_017170565.1 lcl|GPHN_29:8-2323_ORF1_GPHN_29:7:2322, XP_017170568.1, XP_030102590.1 lcl|GPHN_41:8-2320_ORF1_GPHN_41:7:2319, XP_030102591.1 lcl|GPHN_8:8-2281_ORF1_GPHN_8:7:2280, XP_030102592.1, lcl|GPHN_103:8-2287_ORF1_GPHN_103:7:2286, lcl|GPHN_106:8-1873_ORF1_GPHN_106:7:1872, lcl|GPHN…
GLLMLPPK	GLLMLPPK		22.03	867.525	-6.4	434.767	26.57	NP_666077.2 lcl|GPHN_4:8-2326_ORF1_GPHN_4:7:2325, XP_006515962.1, XP_006515963.1, XP_006515964.1, XP_006515965.1, XP_006515966.1, XP_006515967.1, XP_006515968.1 lcl|GPHN_38:8-2365_ORF1_GPHN_38:7:2364, XP_006515969.1 lcl|GPHN_3:8-2257_ORF1_GPHN_3:7:2256, XP_006515970.1 lcl|GPHN_1:8-2218_ORF1_GPHN_1:7:2217, XP_017170562.1, XP_017170563.1, XP_017170564.1, XP_017170565.1 lcl|GPHN_29:8-2323_ORF1_GPHN_…
GLLMLPPK	GLLM(+15.99)LPPK	M4:Oxidation (M):1000.00	19.36	883.52	-3	442.766	24.72	NP_666077.2 lcl|GPHN_4:8-2326_ORF1_GPHN_4:7:2325, XP_006515962.1, XP_006515963.1, XP_006515964.1, XP_006515965.1, XP_006515966.1, XP_006515967.1, XP_006515968.1 lcl|GPHN_38:8-2365_ORF1_GPHN_38:7:2364, XP_006515969.1 lcl|GPHN_3:8-2257_ORF1_GPHN_3:7:2256, XP_006515970.1 lcl|GPHN_1:8-2218_ORF1_GPHN_1:7:2217, XP_017170562.1, XP_017170563.1, XP_017170564.1, XP_017170565.1 lcl|GPHN_29:8-2323_ORF1_GPHN_…
GMLSRPV	GMLSRPV		21.71	758.411	-1.1	380.212	19.62	NP_666077.2 lcl|GPHN_4:8-2326_ORF1_GPHN_4:7:2325, XP_006515962.1, XP_006515963.1, XP_006515964.1, XP_006515965.1, XP_006515966.1, XP_006515967.1, XP_006515968.1 lcl|GPHN_38:8-2365_ORF1_GPHN_38:7:2364, XP_006515969.1 lcl|GPHN_3:8-2257_ORF1_GPHN_3:7:2256, XP_006515970.1 lcl|GPHN_1:8-2218_ORF1_GPHN_1:7:2217, XP_017170562.1, XP_017170563.1, XP_017170564.1, XP_017170565.1 lcl|GPHN_29:8-2323_ORF1_GPHN_…
GMLSRPV	G(+42.01)MLSRPV	G1:Acetylation (Protein N-term):1000.00	21.5	800.421	-3.9	401.216	22.68	NP_666077.2 lcl|GPHN_4:8-2326_ORF1_GPHN_4:7:2325, XP_006515962.1, XP_006515963.1, XP_006515964.1, XP_006515965.1, XP_006515966.1, XP_006515967.1, XP_006515968.1 lcl|GPHN_38:8-2365_ORF1_GPHN_38:7:2364, XP_006515969.1 lcl|GPHN_3:8-2257_ORF1_GPHN_3:7:2256, XP_006515970.1 lcl|GPHN_1:8-2218_ORF1_GPHN_1:7:2217, XP_017170562.1, XP_017170563.1, XP_017170564.1, XP_017170565.1 lcl|GPHN_29:8-2323_ORF1_GPHN_…
GMLSRPV	G(+42.01)M(+15.99)LSRPV	G1:Acetylation (Protein N-term):1000.00;M2:Oxidation (M):1000.00	18.07	816.416	-1	409.215	18.85	NP_666077.2 lcl|GPHN_4:8-2326_ORF1_GPHN_4:7:2325, XP_006515962.1, XP_006515963.1, XP_006515964.1, XP_006515965.1, XP_006515966.1, XP_006515967.1, XP_006515968.1 lcl|GPHN_38:8-2365_ORF1_GPHN_38:7:2364, XP_006515969.1 lcl|GPHN_3:8-2257_ORF1_GPHN_3:7:2256, XP_006515970.1 lcl|GPHN_1:8-2218_ORF1_GPHN_1:7:2217, XP_017170562.1, XP_017170563.1, XP_017170564.1, XP_017170565.1 lcl|GPHN_29:8-2323_ORF1_GPHN_…
GMLSRPVCGI	GMLSRPVC(+57.02)GI	C8:Carbamidomethylation:1000.00	39.51	1088.55	-0.4	545.281	23.89	NP_666077.2 lcl|GPHN_4:8-2326_ORF1_GPHN_4:7:2325, XP_006515962.1, XP_006515963.1, XP_006515964.1, XP_006515965.1, XP_006515966.1, XP_006515967.1, XP_006515968.1 lcl|GPHN_38:8-2365_ORF1_GPHN_38:7:2364, XP_006515969.1 lcl|GPHN_3:8-2257_ORF1_GPHN_3:7:2256, XP_006515970.1 lcl|GPHN_1:8-2218_ORF1_GPHN_1:7:2217, XP_017170562.1, XP_017170563.1, XP_017170564.1, XP_017170565.1 lcl|GPHN_29:8-2323_ORF1_GPHN_…
GMLSRPVCGI	GM(+15.99)LSRPVC(+57.02)GI	M2:Oxidation (M):1000.00;C8:Carbamidomethylation:1000.00	32.05	1104.54	0.5	553.279	20.98	NP_666077.2 lcl|GPHN_4:8-2326_ORF1_GPHN_4:7:2325, XP_006515962.1, XP_006515963.1, XP_006515964.1, XP_006515965.1, XP_006515966.1, XP_006515967.1, XP_006515968.1 lcl|GPHN_38:8-2365_ORF1_GPHN_38:7:2364, XP_006515969.1 lcl|GPHN_3:8-2257_ORF1_GPHN_3:7:2256, XP_006515970.1 lcl|GPHN_1:8-2218_ORF1_GPHN_1:7:2217, XP_017170562.1, XP_017170563.1, XP_017170564.1, XP_017170565.1 lcl|GPHN_29:8-2323_ORF1_GPHN_…
GMLSRPVCGIR	GM(+15.99)LSRPVC(+57.02)GIR	M2:Oxidation (M):1000.00;C8:Carbamidomethylation:1000.00	30.35	1260.64	-0.9	421.221	17.13	NP_666077.2 lcl|GPHN_4:8-2326_ORF1_GPHN_4:7:2325, XP_006515962.1, XP_006515963.1, XP_006515964.1, XP_006515965.1, XP_006515966.1, XP_006515967.1, XP_006515968.1 lcl|GPHN_38:8-2365_ORF1_GPHN_38:7:2364, XP_006515969.1 lcl|GPHN_3:8-2257_ORF1_GPHN_3:7:2256, XP_006515970.1 lcl|GPHN_1:8-2218_ORF1_GPHN_1:7:2217, XP_017170562.1, XP_017170563.1, XP_017170564.1, XP_017170565.1 lcl|GPHN_29:8-2323_ORF1_GPHN_…
GMLSRPVCGIR	GMLSRPVC(+57.02)GIR	C8:Carbamidomethylation:1000.00	28.17	1244.65	-0.1	415.89	19.65	NP_666077.2 lcl|GPHN_4:8-2326_ORF1_GPHN_4:7:2325, XP_006515962.1, XP_006515963.1, XP_006515964.1, XP_006515965.1, XP_006515966.1, XP_006515967.1, XP_006515968.1 lcl|GPHN_38:8-2365_ORF1_GPHN_38:7:2364, XP_006515969.1 lcl|GPHN_3:8-2257_ORF1_GPHN_3:7:2256, XP_006515970.1 lcl|GPHN_1:8-2218_ORF1_GPHN_1:7:2217, XP_017170562.1, XP_017170563.1, XP_017170564.1, XP_017170565.1 lcl|GPHN_29:8-2323_ORF1_GPHN_…
GNELLNPEDDLLPG	GNELLNPEDDLLPG		21.08	1494.72	6.3	748.372	34.48	NP_666077.2 lcl|GPHN_4:8-2326_ORF1_GPHN_4:7:2325, XP_006515962.1, XP_006515963.1, XP_006515964.1, XP_006515965.1, XP_006515966.1, XP_006515967.1, XP_006515968.1 lcl|GPHN_38:8-2365_ORF1_GPHN_38:7:2364, XP_006515969.1 lcl|GPHN_3:8-2257_ORF1_GPHN_3:7:2256, XP_006515970.1 lcl|GPHN_1:8-2218_ORF1_GPHN_1:7:2217, XP_017170562.1, XP_017170563.1, XP_017170564.1, XP_017170565.1 lcl|GPHN_29:8-2323_ORF1_GPHN_…
GNELLNPEDDLLPGK	GNELLNPEDDLLPGK		38.04	1622.82	1	812.416	29.22	NP_666077.2 lcl|GPHN_4:8-2326_ORF1_GPHN_4:7:2325, XP_006515962.1, XP_006515963.1, XP_006515964.1, XP_006515965.1, XP_006515966.1, XP_006515967.1, XP_006515968.1 lcl|GPHN_38:8-2365_ORF1_GPHN_38:7:2364, XP_006515969.1 lcl|GPHN_3:8-2257_ORF1_GPHN_3:7:2256, XP_006515970.1 lcl|GPHN_1:8-2218_ORF1_GPHN_1:7:2217, XP_017170562.1, XP_017170563.1, XP_017170564.1, XP_017170565.1 lcl|GPHN_29:8-2323_ORF1_GPHN_…
GNELLNPEDDLLPGKI	GNELLNPEDDLLPGKI		32.99	1735.9	0.6	868.957	31.79	NP_666077.2 lcl|GPHN_4:8-2326_ORF1_GPHN_4:7:2325, XP_006515962.1, XP_006515963.1, XP_006515964.1, XP_006515965.1, XP_006515966.1, XP_006515967.1, XP_006515968.1 lcl|GPHN_38:8-2365_ORF1_GPHN_38:7:2364, XP_006515969.1 lcl|GPHN_3:8-2257_ORF1_GPHN_3:7:2256, XP_006515970.1 lcl|GPHN_1:8-2218_ORF1_GPHN_1:7:2217, XP_017170562.1, XP_017170563.1, XP_017170564.1, XP_017170565.1 lcl|GPHN_29:8-2323_ORF1_GPHN_…
GNELLNPEDDLLPGKIRDSNR	GNELLNPEDDLLPGKIRDSNR		37.9	2364.2	-3.2	789.072	25.73	NP_666077.2 lcl|GPHN_4:8-2326_ORF1_GPHN_4:7:2325, XP_006515962.1, XP_006515963.1, XP_006515964.1, XP_006515965.1, XP_006515966.1, XP_006515967.1, XP_006515968.1 lcl|GPHN_38:8-2365_ORF1_GPHN_38:7:2364, XP_006515969.1 lcl|GPHN_3:8-2257_ORF1_GPHN_3:7:2256, XP_006515970.1 lcl|GPHN_1:8-2218_ORF1_GPHN_1:7:2217, XP_017170562.1, XP_017170563.1, XP_017170564.1, XP_017170565.1 lcl|GPHN_29:8-2323_ORF1_GPHN_…
GNELLNPEDDLLPGKIRDSNRS	GNELLNPEDDLLPGKIRDSNRS		38.02	2451.24	0.6	818.086	25.63	NP_666077.2 lcl|GPHN_4:8-2326_ORF1_GPHN_4:7:2325, XP_006515962.1, XP_006515963.1, XP_006515964.1, XP_006515965.1, XP_006515966.1, XP_006515967.1, XP_006515968.1 lcl|GPHN_38:8-2365_ORF1_GPHN_38:7:2364, XP_006515969.1 lcl|GPHN_3:8-2257_ORF1_GPHN_3:7:2256, XP_006515970.1 lcl|GPHN_1:8-2218_ORF1_GPHN_1:7:2217, XP_017170562.1, XP_017170563.1, XP_017170564.1, XP_017170565.1 lcl|GPHN_29:8-2323_ORF1_GPHN_…
GNELLNPEDDLLPGKIRDSNRSTLLA	GNELLNPEDDLLPGKIRDSNRSTLLA		42.54	2849.49	1.8	713.381	28.53	NP_666077.2 lcl|GPHN_4:8-2326_ORF1_GPHN_4:7:2325, XP_006515962.1, XP_006515963.1, XP_006515964.1, XP_006515965.1, XP_006515966.1, XP_006515967.1, XP_006515968.1 lcl|GPHN_38:8-2365_ORF1_GPHN_38:7:2364, XP_006515969.1 lcl|GPHN_3:8-2257_ORF1_GPHN_3:7:2256, XP_006515970.1 lcl|GPHN_1:8-2218_ORF1_GPHN_1:7:2217, XP_017170562.1, XP_017170563.1, XP_017170564.1, XP_017170565.1 lcl|GPHN_29:8-2323_ORF1_GPHN_…
GNQMSSRLM	GNQM(+15.99)SSRLM	M4:Oxidation (M):20.54	28.71	1038.46	-0.3	520.236	16.08	NP_666077.2 lcl|GPHN_4:8-2326_ORF1_GPHN_4:7:2325, XP_006515962.1, XP_006515963.1, XP_006515964.1, XP_006515965.1, XP_006515966.1, XP_006515967.1, XP_006515968.1 lcl|GPHN_38:8-2365_ORF1_GPHN_38:7:2364, XP_006515969.1 lcl|GPHN_3:8-2257_ORF1_GPHN_3:7:2256, XP_006515970.1 lcl|GPHN_1:8-2218_ORF1_GPHN_1:7:2217, XP_017170562.1, XP_017170563.1, XP_017170564.1, XP_017170565.1 lcl|GPHN_29:8-2323_ORF1_GPHN_…
GNQMSSRLMSM	GNQM(+15.99)SSRLMSM(+15.99)	M4:Oxidation (M):51.00;M11:Oxidation (M):54.01	33.61	1272.53	0.5	637.271	16.58	NP_666077.2 lcl|GPHN_4:8-2326_ORF1_GPHN_4:7:2325, XP_006515962.1, XP_006515963.1, XP_006515964.1, XP_006515965.1, XP_006515966.1, XP_006515967.1, XP_006515968.1 lcl|GPHN_38:8-2365_ORF1_GPHN_38:7:2364, XP_006515969.1 lcl|GPHN_3:8-2257_ORF1_GPHN_3:7:2256, XP_006515970.1 lcl|GPHN_1:8-2218_ORF1_GPHN_1:7:2217, XP_017170562.1, XP_017170563.1, XP_017170564.1, XP_017170565.1 lcl|GPHN_29:8-2323_ORF1_GPHN_…
GNQMSSRLMSMR	GNQM(+15.99)SSRLM(+15.99)SMR	M4:Oxidation (M):51.59;M9:Oxidation (M):14.04	37.54	1428.63	-0.5	477.216	14.88	NP_666077.2 lcl|GPHN_4:8-2326_ORF1_GPHN_4:7:2325, XP_006515962.1, XP_006515963.1, XP_006515964.1, XP_006515965.1, XP_006515966.1, XP_006515967.1, XP_006515968.1 lcl|GPHN_38:8-2365_ORF1_GPHN_38:7:2364, XP_006515969.1 lcl|GPHN_3:8-2257_ORF1_GPHN_3:7:2256, XP_006515970.1 lcl|GPHN_1:8-2218_ORF1_GPHN_1:7:2217, XP_017170562.1, XP_017170563.1, XP_017170564.1, XP_017170565.1 lcl|GPHN_29:8-2323_ORF1_GPHN_…
GNQMSSRLMSMR	GNQM(+15.99)SSRLMSMR	M4:Oxidation (M):56.99	21.01	1412.63	0.7	471.885	17.17	NP_666077.2 lcl|GPHN_4:8-2326_ORF1_GPHN_4:7:2325, XP_006515962.1, XP_006515963.1, XP_006515964.1, XP_006515965.1, XP_006515966.1, XP_006515967.1, XP_006515968.1 lcl|GPHN_38:8-2365_ORF1_GPHN_38:7:2364, XP_006515969.1 lcl|GPHN_3:8-2257_ORF1_GPHN_3:7:2256, XP_006515970.1 lcl|GPHN_1:8-2218_ORF1_GPHN_1:7:2217, XP_017170562.1, XP_017170563.1, XP_017170564.1, XP_017170565.1 lcl|GPHN_29:8-2323_ORF1_GPHN_…
GNQMSSRLMSMRSA	GNQM(+15.99)SSRLM(+15.99)SMRSA	M4:Oxidation (M):71.72;M9:Oxidation (M):32.28	24.73	1586.7	-1.2	529.905	15.51	NP_666077.2 lcl|GPHN_4:8-2326_ORF1_GPHN_4:7:2325, XP_006515962.1, XP_006515963.1, XP_006515964.1, XP_006515965.1, XP_006515966.1, XP_006515967.1, XP_006515968.1 lcl|GPHN_38:8-2365_ORF1_GPHN_38:7:2364, XP_006515969.1 lcl|GPHN_3:8-2257_ORF1_GPHN_3:7:2256, XP_006515970.1 lcl|GPHN_1:8-2218_ORF1_GPHN_1:7:2217, XP_017170562.1, XP_017170563.1, XP_017170564.1, XP_017170565.1 lcl|GPHN_29:8-2323_ORF1_GPHN_…
GPGDRFIIG	GPGDRFIIG		31.06	930.492	-3.5	466.252	25.34	NP_666077.2 lcl|GPHN_4:8-2326_ORF1_GPHN_4:7:2325, XP_006515962.1, XP_006515963.1, XP_006515964.1, XP_006515965.1, XP_006515966.1, XP_006515967.1, XP_006515968.1 lcl|GPHN_38:8-2365_ORF1_GPHN_38:7:2364, XP_006515969.1 lcl|GPHN_3:8-2257_ORF1_GPHN_3:7:2256, XP_006515970.1 lcl|GPHN_1:8-2218_ORF1_GPHN_1:7:2217, XP_017170562.1, XP_017170563.1, XP_017170564.1, XP_017170565.1 lcl|GPHN_29:8-2323_ORF1_GPHN_…
GPGDRFIIGE	GPGDRFIIGE		22.07	1059.53	1.7	530.776	25.74	NP_666077.2 lcl|GPHN_4:8-2326_ORF1_GPHN_4:7:2325, XP_006515962.1, XP_006515963.1, XP_006515964.1, XP_006515965.1, XP_006515966.1, XP_006515967.1, XP_006515968.1 lcl|GPHN_38:8-2365_ORF1_GPHN_38:7:2364, XP_006515969.1 lcl|GPHN_3:8-2257_ORF1_GPHN_3:7:2256, XP_006515970.1 lcl|GPHN_1:8-2218_ORF1_GPHN_1:7:2217, XP_017170562.1, XP_017170563.1, XP_017170564.1, XP_017170565.1 lcl|GPHN_29:8-2323_ORF1_GPHN_…
GPGDRFIIGESQAGEQPT	GPGDRFIIGESQAGEQPT		42.77	1857.89	2	929.952	25.15	NP_666077.2 lcl|GPHN_4:8-2326_ORF1_GPHN_4:7:2325, XP_006515962.1, XP_006515963.1, XP_006515964.1, XP_006515965.1, XP_006515966.1, XP_006515967.1, XP_006515968.1 lcl|GPHN_38:8-2365_ORF1_GPHN_38:7:2364, XP_006515969.1 lcl|GPHN_3:8-2257_ORF1_GPHN_3:7:2256, XP_006515970.1 lcl|GPHN_1:8-2218_ORF1_GPHN_1:7:2217, XP_017170562.1, XP_017170563.1, XP_017170564.1, XP_017170565.1 lcl|GPHN_29:8-2323_ORF1_GPHN_…
GPGDRFIIGESQAGEQPTQT	GPGDRFIIGESQAGEQPTQT		40.96	2086.99	-0.8	1044.5	25.08	NP_666077.2 lcl|GPHN_4:8-2326_ORF1_GPHN_4:7:2325, XP_006515962.1, XP_006515963.1, XP_006515964.1, XP_006515965.1, XP_006515966.1, XP_006515967.1, XP_006515968.1 lcl|GPHN_38:8-2365_ORF1_GPHN_38:7:2364, XP_006515969.1 lcl|GPHN_3:8-2257_ORF1_GPHN_3:7:2256, XP_006515970.1 lcl|GPHN_1:8-2218_ORF1_GPHN_1:7:2217, XP_017170562.1, XP_017170563.1, XP_017170564.1, XP_017170565.1 lcl|GPHN_29:8-2323_ORF1_GPHN_…
GQDIRPI	GQDIRPI		20.48	797.439	-1	399.727	19.09	NP_666077.2 lcl|GPHN_4:8-2326_ORF1_GPHN_4:7:2325, XP_006515962.1, XP_006515963.1, XP_006515964.1, XP_006515965.1, XP_006515966.1, XP_006515967.1, XP_006515968.1 lcl|GPHN_38:8-2365_ORF1_GPHN_38:7:2364, XP_006515969.1 lcl|GPHN_3:8-2257_ORF1_GPHN_3:7:2256, XP_006515970.1 lcl|GPHN_1:8-2218_ORF1_GPHN_1:7:2217, XP_017170562.1, XP_017170563.1, XP_017170564.1, XP_017170565.1 lcl|GPHN_29:8-2323_ORF1_GPHN_…
GQDIRPIG	GQDIRPIG		19.61	854.461	-2.6	428.237	18.45	NP_666077.2 lcl|GPHN_4:8-2326_ORF1_GPHN_4:7:2325, XP_006515962.1, XP_006515963.1, XP_006515964.1, XP_006515965.1, XP_006515966.1, XP_006515967.1, XP_006515968.1 lcl|GPHN_38:8-2365_ORF1_GPHN_38:7:2364, XP_006515969.1 lcl|GPHN_3:8-2257_ORF1_GPHN_3:7:2256, XP_006515970.1 lcl|GPHN_1:8-2218_ORF1_GPHN_1:7:2217, XP_017170562.1, XP_017170563.1, XP_017170564.1, XP_017170565.1 lcl|GPHN_29:8-2323_ORF1_GPHN_…
GRVFMKPGLPTT	GRVFM(+15.99)KPGLPTT	M5:Oxidation (M):1000.00	27.54	1318.71	-1.1	440.576	19.78	NP_666077.2 lcl|GPHN_4:8-2326_ORF1_GPHN_4:7:2325, XP_006515962.1, XP_006515963.1, XP_006515964.1, XP_006515965.1, XP_006515966.1, XP_006515967.1, XP_006515968.1 lcl|GPHN_38:8-2365_ORF1_GPHN_38:7:2364, XP_006515969.1 lcl|GPHN_3:8-2257_ORF1_GPHN_3:7:2256, XP_006515970.1 lcl|GPHN_1:8-2218_ORF1_GPHN_1:7:2217, XP_017170562.1, XP_017170563.1, XP_017170564.1, XP_017170565.1 lcl|GPHN_29:8-2323_ORF1_GPHN_…
GSADKRIPDS	GSADKRIPDS		26.49	1044.52	-0.3	523.267	13.87	NP_666077.2 lcl|GPHN_4:8-2326_ORF1_GPHN_4:7:2325, XP_006515962.1, XP_006515963.1, XP_006515964.1, XP_006515965.1, XP_006515968.1 lcl|GPHN_38:8-2365_ORF1_GPHN_38:7:2364, XP_017170562.1, XP_017170563.1, XP_017170564.1, lcl|GPHN_101:8-994_ORF2_GPHN_101:7:993, lcl|GPHN_105:73-2247_ORF1_GPHN_105:72:2246, lcl|GPHN_119:441-2183_ORF3_GPHN_119:440:2182, lcl|GPHN_121:8-2368_ORF1_GPHN_121:7:2367, lcl|GPHN_1…
GSADKRIPDSI	GSADKRIPDSI		42.05	1157.6	1	579.81	18.84	NP_666077.2 lcl|GPHN_4:8-2326_ORF1_GPHN_4:7:2325, XP_006515962.1, XP_006515963.1, XP_006515964.1, XP_006515965.1, XP_006515968.1 lcl|GPHN_38:8-2365_ORF1_GPHN_38:7:2364, XP_017170562.1, XP_017170563.1, XP_017170564.1, lcl|GPHN_101:8-994_ORF2_GPHN_101:7:993, lcl|GPHN_105:73-2247_ORF1_GPHN_105:72:2246, lcl|GPHN_119:441-2183_ORF3_GPHN_119:440:2182, lcl|GPHN_121:8-2368_ORF1_GPHN_121:7:2367, lcl|GPHN_1…
GSADKRIPDSII	GSADKRIPDSII		30.92	1270.69	1.2	636.352	22.43	NP_666077.2 lcl|GPHN_4:8-2326_ORF1_GPHN_4:7:2325, XP_006515962.1, XP_006515963.1, XP_006515964.1, XP_006515965.1, XP_006515968.1 lcl|GPHN_38:8-2365_ORF1_GPHN_38:7:2364, XP_017170562.1, XP_017170563.1, XP_017170564.1, lcl|GPHN_101:8-994_ORF2_GPHN_101:7:993, lcl|GPHN_105:73-2247_ORF1_GPHN_105:72:2246, lcl|GPHN_119:441-2183_ORF3_GPHN_119:440:2182, lcl|GPHN_121:8-2368_ORF1_GPHN_121:7:2367, lcl|GPHN_1…
GSADKRIPDSIIS	GSADKRIPDSIIS		29.8	1357.72	0.7	679.868	21.4	NP_666077.2 lcl|GPHN_4:8-2326_ORF1_GPHN_4:7:2325, XP_006515962.1, XP_006515963.1, XP_006515964.1, XP_006515965.1, XP_006515968.1 lcl|GPHN_38:8-2365_ORF1_GPHN_38:7:2364, XP_017170562.1, XP_017170563.1, XP_017170564.1, lcl|GPHN_101:8-994_ORF2_GPHN_101:7:993, lcl|GPHN_105:73-2247_ORF1_GPHN_105:72:2246, lcl|GPHN_119:441-2183_ORF3_GPHN_119:440:2182, lcl|GPHN_121:8-2368_ORF1_GPHN_121:7:2367, lcl|GPHN_1…
GSADKRIPDSIISR	GSADKRIPDSIISR		45.62	1513.82	-0.1	505.614	19.17	NP_666077.2 lcl|GPHN_4:8-2326_ORF1_GPHN_4:7:2325, XP_006515962.1, XP_006515963.1, XP_006515964.1, XP_006515965.1, XP_006515968.1 lcl|GPHN_38:8-2365_ORF1_GPHN_38:7:2364, XP_017170562.1, XP_017170563.1, XP_017170564.1, lcl|GPHN_101:8-994_ORF2_GPHN_101:7:993, lcl|GPHN_105:73-2247_ORF1_GPHN_105:72:2246, lcl|GPHN_119:441-2183_ORF3_GPHN_119:440:2182, lcl|GPHN_121:8-2368_ORF1_GPHN_121:7:2367, lcl|GPHN_1…
GSADKRIPDSIISRG	GSADKRIPDSIISRG		43.37	1570.84	0.1	524.621	19.28	NP_666077.2 lcl|GPHN_4:8-2326_ORF1_GPHN_4:7:2325, XP_006515962.1, XP_006515963.1, XP_006515964.1, XP_006515965.1, XP_006515968.1 lcl|GPHN_38:8-2365_ORF1_GPHN_38:7:2364, XP_017170562.1, XP_017170563.1, XP_017170564.1, lcl|GPHN_101:8-994_ORF2_GPHN_101:7:993, lcl|GPHN_105:73-2247_ORF1_GPHN_105:72:2246, lcl|GPHN_119:441-2183_ORF3_GPHN_119:440:2182, lcl|GPHN_121:8-2368_ORF1_GPHN_121:7:2367, lcl|GPHN_1…
GSADKRIPDSIISRGV	GSADKRIPDSIISRGV		35.08	1669.91	-0.1	557.644	21.46	NP_666077.2 lcl|GPHN_4:8-2326_ORF1_GPHN_4:7:2325, XP_006515962.1, XP_006515963.1, XP_006515964.1, XP_006515965.1, XP_006515968.1 lcl|GPHN_38:8-2365_ORF1_GPHN_38:7:2364, XP_017170562.1, XP_017170563.1, XP_017170564.1, lcl|GPHN_101:8-994_ORF2_GPHN_101:7:993, lcl|GPHN_105:73-2247_ORF1_GPHN_105:72:2246, lcl|GPHN_119:441-2183_ORF3_GPHN_119:440:2182, lcl|GPHN_121:8-2368_ORF1_GPHN_121:7:2367, lcl|GPHN_1…
GSADKRIPDSIISRGVQVLPRDTA	GSADKRIPDSIISRGVQVLPRDTA		48.83	2550.39	-2.2	638.603	24.57	NP_666077.2 lcl|GPHN_4:8-2326_ORF1_GPHN_4:7:2325, XP_006515962.1, XP_006515963.1, XP_006515964.1, XP_006515965.1, XP_006515968.1 lcl|GPHN_38:8-2365_ORF1_GPHN_38:7:2364, XP_017170562.1, XP_017170563.1, XP_017170564.1, lcl|GPHN_101:8-994_ORF2_GPHN_101:7:993, lcl|GPHN_105:73-2247_ORF1_GPHN_105:72:2246, lcl|GPHN_119:441-2183_ORF3_GPHN_119:440:2182, lcl|GPHN_121:8-2368_ORF1_GPHN_121:7:2367, lcl|GPHN_1…
GSLNVTPLG	GSLNVTPLG		22.43	856.465	-0.1	429.24	27.48	NP_666077.2 lcl|GPHN_4:8-2326_ORF1_GPHN_4:7:2325, XP_006515962.1, XP_006515963.1, XP_006515964.1, XP_006515965.1, XP_006515966.1, XP_006515967.1, XP_006515968.1 lcl|GPHN_38:8-2365_ORF1_GPHN_38:7:2364, XP_006515969.1 lcl|GPHN_3:8-2257_ORF1_GPHN_3:7:2256, XP_006515970.1 lcl|GPHN_1:8-2218_ORF1_GPHN_1:7:2217, XP_017170562.1, XP_017170563.1, XP_017170564.1, XP_017170565.1 lcl|GPHN_29:8-2323_ORF1_GPHN_…
GSLNVTPLGM	GSLNVTPLGM		20.71	987.506	1.1	494.761	31.25	NP_666077.2 lcl|GPHN_4:8-2326_ORF1_GPHN_4:7:2325, XP_006515962.1, XP_006515963.1, XP_006515964.1, XP_006515965.1, XP_006515966.1, XP_006515967.1, XP_006515968.1 lcl|GPHN_38:8-2365_ORF1_GPHN_38:7:2364, XP_006515969.1 lcl|GPHN_3:8-2257_ORF1_GPHN_3:7:2256, XP_006515970.1 lcl|GPHN_1:8-2218_ORF1_GPHN_1:7:2217, XP_017170562.1, XP_017170563.1, XP_017170564.1, XP_017170565.1 lcl|GPHN_29:8-2323_ORF1_GPHN_…
GSLNVTPLGML	GSLNVTPLGM(+15.99)L	M10:Oxidation (M):1000.00	24.09	1116.58	-0.7	559.299	32.46	NP_666077.2 lcl|GPHN_4:8-2326_ORF1_GPHN_4:7:2325, XP_006515962.1, XP_006515963.1, XP_006515964.1, XP_006515965.1, XP_006515966.1, XP_006515967.1, XP_006515968.1 lcl|GPHN_38:8-2365_ORF1_GPHN_38:7:2364, XP_006515969.1 lcl|GPHN_3:8-2257_ORF1_GPHN_3:7:2256, XP_006515970.1 lcl|GPHN_1:8-2218_ORF1_GPHN_1:7:2217, XP_017170562.1, XP_017170563.1, XP_017170564.1, XP_017170565.1 lcl|GPHN_29:8-2323_ORF1_GPHN_…
GSLNVTPLGMLSR	GSLNVTPLGMLSR		37.99	1343.72	1.7	672.87	29.78	NP_666077.2 lcl|GPHN_4:8-2326_ORF1_GPHN_4:7:2325, XP_006515962.1, XP_006515963.1, XP_006515964.1, XP_006515965.1, XP_006515966.1, XP_006515967.1, XP_006515968.1 lcl|GPHN_38:8-2365_ORF1_GPHN_38:7:2364, XP_006515969.1 lcl|GPHN_3:8-2257_ORF1_GPHN_3:7:2256, XP_006515970.1 lcl|GPHN_1:8-2218_ORF1_GPHN_1:7:2217, XP_017170562.1, XP_017170563.1, XP_017170564.1, XP_017170565.1 lcl|GPHN_29:8-2323_ORF1_GPHN_…
GSLNVTPLGMLSR	GSLNVTPLGM(+15.99)LSR	M10:Oxidation (M):1000.00	32.85	1359.72	1.1	680.867	26.48	NP_666077.2 lcl|GPHN_4:8-2326_ORF1_GPHN_4:7:2325, XP_006515962.1, XP_006515963.1, XP_006515964.1, XP_006515965.1, XP_006515966.1, XP_006515967.1, XP_006515968.1 lcl|GPHN_38:8-2365_ORF1_GPHN_38:7:2364, XP_006515969.1 lcl|GPHN_3:8-2257_ORF1_GPHN_3:7:2256, XP_006515970.1 lcl|GPHN_1:8-2218_ORF1_GPHN_1:7:2217, XP_017170562.1, XP_017170563.1, XP_017170564.1, XP_017170565.1 lcl|GPHN_29:8-2323_ORF1_GPHN_…
GSLNVTPLGMLSRPV	GSLNVTPLGM(+15.99)LSRPV	M10:Oxidation (M):1000.00	23.67	1555.84	0.1	778.927	28.12	NP_666077.2 lcl|GPHN_4:8-2326_ORF1_GPHN_4:7:2325, XP_006515962.1, XP_006515963.1, XP_006515964.1, XP_006515965.1, XP_006515966.1, XP_006515967.1, XP_006515968.1 lcl|GPHN_38:8-2365_ORF1_GPHN_38:7:2364, XP_006515969.1 lcl|GPHN_3:8-2257_ORF1_GPHN_3:7:2256, XP_006515970.1 lcl|GPHN_1:8-2218_ORF1_GPHN_1:7:2217, XP_017170562.1, XP_017170563.1, XP_017170564.1, XP_017170565.1 lcl|GPHN_29:8-2323_ORF1_GPHN_…
GSLNVTPLGMLSRPVCGIR	GSLNVTPLGM(+15.99)LSRPVC(+57.02)GIR	M10:Oxidation (M):1000.00;C16:Carbamidomethylation:1000.00	24.79	2042.08	1	681.7	26.38	NP_666077.2 lcl|GPHN_4:8-2326_ORF1_GPHN_4:7:2325, XP_006515962.1, XP_006515963.1, XP_006515964.1, XP_006515965.1, XP_006515966.1, XP_006515967.1, XP_006515968.1 lcl|GPHN_38:8-2365_ORF1_GPHN_38:7:2364, XP_006515969.1 lcl|GPHN_3:8-2257_ORF1_GPHN_3:7:2256, XP_006515970.1 lcl|GPHN_1:8-2218_ORF1_GPHN_1:7:2217, XP_017170562.1, XP_017170563.1, XP_017170564.1, XP_017170565.1 lcl|GPHN_29:8-2323_ORF1_GPHN_…
GSQECFQF	GSQEC(+57.02)FQF	C5:Carbamidomethylation:1000.00	25.17	1001.39	-0.5	501.703	28.5	NP_666077.2 lcl|GPHN_4:8-2326_ORF1_GPHN_4:7:2325, XP_006515962.1, XP_006515963.1, XP_006515964.1, XP_006515965.1, XP_006515966.1, XP_006515967.1, XP_006515968.1 lcl|GPHN_38:8-2365_ORF1_GPHN_38:7:2364, XP_006515969.1 lcl|GPHN_3:8-2257_ORF1_GPHN_3:7:2256, XP_006515970.1 lcl|GPHN_1:8-2218_ORF1_GPHN_1:7:2217, XP_017170562.1, XP_017170563.1, XP_017170564.1, XP_017170565.1 lcl|GPHN_29:8-2323_ORF1_GPHN_…
GSQECFQFILPA	GSQEC(+57.02)FQFILPA	C5:Carbamidomethylation:1000.00	18.29	1395.65	0.8	698.832	35.54	NP_666077.2 lcl|GPHN_4:8-2326_ORF1_GPHN_4:7:2325, XP_006515962.1, XP_006515963.1, XP_006515964.1, XP_006515965.1, XP_006515966.1, XP_006515967.1, XP_006515968.1 lcl|GPHN_38:8-2365_ORF1_GPHN_38:7:2364, XP_006515969.1 lcl|GPHN_3:8-2257_ORF1_GPHN_3:7:2256, XP_006515970.1 lcl|GPHN_1:8-2218_ORF1_GPHN_1:7:2217, XP_017170562.1, XP_017170563.1, XP_017170564.1, XP_017170565.1 lcl|GPHN_29:8-2323_ORF1_GPHN_…
GSQECFQFILPALPH	GSQEC(+57.02)FQFILPALPH	C5:Carbamidomethylation:1000.00	44.67	1742.85	-0.9	581.955	34.69	NP_666077.2 lcl|GPHN_4:8-2326_ORF1_GPHN_4:7:2325, XP_006515962.1, XP_006515963.1, XP_006515964.1, XP_006515965.1, XP_006515966.1, XP_006515967.1, XP_006515968.1 lcl|GPHN_38:8-2365_ORF1_GPHN_38:7:2364, XP_006515969.1 lcl|GPHN_3:8-2257_ORF1_GPHN_3:7:2256, XP_006515970.1 lcl|GPHN_1:8-2218_ORF1_GPHN_1:7:2217, XP_017170562.1, XP_017170563.1, XP_017170564.1, XP_017170565.1 lcl|GPHN_29:8-2323_ORF1_GPHN_…
GSQECFQFILPALPHAI	GSQECFQFILPALPHAI		31.33	1869.94	0.1	624.322	35.72	NP_666077.2 lcl|GPHN_4:8-2326_ORF1_GPHN_4:7:2325, XP_006515962.1, XP_006515963.1, XP_006515964.1, XP_006515965.1, XP_006515966.1, XP_006515967.1, XP_006515968.1 lcl|GPHN_38:8-2365_ORF1_GPHN_38:7:2364, XP_006515969.1 lcl|GPHN_3:8-2257_ORF1_GPHN_3:7:2256, XP_006515970.1 lcl|GPHN_1:8-2218_ORF1_GPHN_1:7:2217, XP_017170562.1, XP_017170563.1, XP_017170564.1, XP_017170565.1 lcl|GPHN_29:8-2323_ORF1_GPHN_…
GSQECFQFILPALPHAIDLLR	GSQEC(+57.02)FQFILPALPHAIDLLR	C5:Carbamidomethylation:1000.00	47.42	2424.26	-0.1	809.095	36.11	NP_666077.2 lcl|GPHN_4:8-2326_ORF1_GPHN_4:7:2325, XP_006515962.1, XP_006515963.1, XP_006515964.1, XP_006515965.1, XP_006515966.1, XP_006515967.1, XP_006515968.1 lcl|GPHN_38:8-2365_ORF1_GPHN_38:7:2364, XP_006515969.1 lcl|GPHN_3:8-2257_ORF1_GPHN_3:7:2256, XP_006515970.1 lcl|GPHN_1:8-2218_ORF1_GPHN_1:7:2217, XP_017170562.1, XP_017170563.1, XP_017170564.1, XP_017170565.1 lcl|GPHN_29:8-2323_ORF1_GPHN_…
GSQECFQFILPALPHAIDLLR	G(+42.01)SQEC(+57.02)FQFILPALPHAIDLLR	G1:Acetylation (Protein N-term):1000.00;C5:Carbamidomethylation:1000.00	34.54	2466.27	0.6	823.099	37.58	NP_666077.2 lcl|GPHN_4:8-2326_ORF1_GPHN_4:7:2325, XP_006515962.1, XP_006515963.1, XP_006515964.1, XP_006515965.1, XP_006515966.1, XP_006515967.1, XP_006515968.1 lcl|GPHN_38:8-2365_ORF1_GPHN_38:7:2364, XP_006515969.1 lcl|GPHN_3:8-2257_ORF1_GPHN_3:7:2256, XP_006515970.1 lcl|GPHN_1:8-2218_ORF1_GPHN_1:7:2217, XP_017170562.1, XP_017170563.1, XP_017170564.1, XP_017170565.1 lcl|GPHN_29:8-2323_ORF1_GPHN_…
GTEELEVR	GTEELEVR		29.9	931.461	1.7	466.739	18.38	NP_666077.2 lcl|GPHN_4:8-2326_ORF1_GPHN_4:7:2325, XP_006515962.1, XP_006515963.1, XP_006515964.1, XP_006515965.1, XP_006515966.1, XP_006515967.1, XP_006515968.1 lcl|GPHN_38:8-2365_ORF1_GPHN_38:7:2364, XP_006515969.1 lcl|GPHN_3:8-2257_ORF1_GPHN_3:7:2256, XP_006515970.1 lcl|GPHN_1:8-2218_ORF1_GPHN_1:7:2217, XP_017170562.1, XP_017170563.1, XP_017170564.1, XP_017170565.1 lcl|GPHN_29:8-2323_ORF1_GPHN_…
GTEIINYR	GTEIINYR		28.94	964.498	2.3	483.257	20.6	NP_666077.2 lcl|GPHN_4:8-2326_ORF1_GPHN_4:7:2325, XP_006515962.1, XP_006515963.1, XP_006515964.1, XP_006515965.1, XP_006515966.1, XP_006515967.1, XP_006515968.1 lcl|GPHN_38:8-2365_ORF1_GPHN_38:7:2364, XP_006515969.1 lcl|GPHN_3:8-2257_ORF1_GPHN_3:7:2256, XP_006515970.1 lcl|GPHN_1:8-2218_ORF1_GPHN_1:7:2217, XP_017170562.1, XP_017170563.1, XP_017170564.1, XP_017170565.1 lcl|GPHN_29:8-2323_ORF1_GPHN_…
GTEIINYRDG	GTEIINYRDG		26.53	1136.55	-1	569.28	21.09	NP_666077.2 lcl|GPHN_4:8-2326_ORF1_GPHN_4:7:2325, XP_006515962.1, XP_006515963.1, XP_006515964.1, XP_006515965.1, XP_006515966.1, XP_006515967.1, XP_006515968.1 lcl|GPHN_38:8-2365_ORF1_GPHN_38:7:2364, XP_006515969.1 lcl|GPHN_3:8-2257_ORF1_GPHN_3:7:2256, XP_006515970.1 lcl|GPHN_1:8-2218_ORF1_GPHN_1:7:2217, XP_017170562.1, XP_017170563.1, XP_017170564.1, XP_017170565.1 lcl|GPHN_29:8-2323_ORF1_GPHN_…
GTEIINYRDGMG	GTEIINYRDGMG		36.06	1324.61	1.2	663.312	23.5	NP_666077.2 lcl|GPHN_4:8-2326_ORF1_GPHN_4:7:2325, XP_006515962.1, XP_006515963.1, XP_006515964.1, XP_006515965.1, XP_006515966.1, XP_006515967.1, XP_006515968.1 lcl|GPHN_38:8-2365_ORF1_GPHN_38:7:2364, XP_006515969.1 lcl|GPHN_3:8-2257_ORF1_GPHN_3:7:2256, XP_006515970.1 lcl|GPHN_1:8-2218_ORF1_GPHN_1:7:2217, XP_017170562.1, XP_017170563.1, XP_017170564.1, XP_017170565.1 lcl|GPHN_29:8-2323_ORF1_GPHN_…
GTEIINYRDGMG	GTEIINYRDGM(+15.99)G	M11:Oxidation (M):1000.00	22.81	1340.6	1.4	671.31	21.06	NP_666077.2 lcl|GPHN_4:8-2326_ORF1_GPHN_4:7:2325, XP_006515962.1, XP_006515963.1, XP_006515964.1, XP_006515965.1, XP_006515966.1, XP_006515967.1, XP_006515968.1 lcl|GPHN_38:8-2365_ORF1_GPHN_38:7:2364, XP_006515969.1 lcl|GPHN_3:8-2257_ORF1_GPHN_3:7:2256, XP_006515970.1 lcl|GPHN_1:8-2218_ORF1_GPHN_1:7:2217, XP_017170562.1, XP_017170563.1, XP_017170564.1, XP_017170565.1 lcl|GPHN_29:8-2323_ORF1_GPHN_…
GTEIINYRDGMGRVL	GTEIINYRDGM(+15.99)GRVL	M11:Oxidation (M):1000.00	19.16	1708.86	0.5	570.626	22.89	NP_666077.2 lcl|GPHN_4:8-2326_ORF1_GPHN_4:7:2325, XP_006515962.1, XP_006515963.1, XP_006515964.1, XP_006515965.1, XP_006515966.1, XP_006515967.1, XP_006515968.1 lcl|GPHN_38:8-2365_ORF1_GPHN_38:7:2364, XP_006515969.1 lcl|GPHN_3:8-2257_ORF1_GPHN_3:7:2256, XP_006515970.1 lcl|GPHN_1:8-2218_ORF1_GPHN_1:7:2217, XP_017170562.1, XP_017170563.1, XP_017170564.1, XP_017170565.1 lcl|GPHN_29:8-2323_ORF1_GPHN_…
GTGFAPRDVTPEAT	GTGFAPRDVTPEAT		44.31	1417.68	0	709.849	22.08	NP_666077.2 lcl|GPHN_4:8-2326_ORF1_GPHN_4:7:2325, XP_006515962.1, XP_006515967.1, XP_006515970.1 lcl|GPHN_1:8-2218_ORF1_GPHN_1:7:2217, XP_017170564.1, XP_017170565.1 lcl|GPHN_29:8-2323_ORF1_GPHN_29:7:2322, XP_017170567.1, XP_030102591.1 lcl|GPHN_8:8-2281_ORF1_GPHN_8:7:2280, XP_030102593.1 lcl|GPHN_2:8-1945_ORF1_GPHN_2:7:1944, lcl|GPHN_101:8-994_ORF2_GPHN_101:7:993, lcl|GPHN_102:8-943_ORF2_GPHN_10…
GTGFAPRDVTPEATKEVIEREAPGMA	GTGFAPRDVTPEATKEVIEREAPGM(+15.99)A	M25:Oxidation (M):1000.00	33.57	2744.34	-2.4	915.786	24.5	NP_666077.2 lcl|GPHN_4:8-2326_ORF1_GPHN_4:7:2325, XP_006515962.1, XP_006515967.1, XP_006515970.1 lcl|GPHN_1:8-2218_ORF1_GPHN_1:7:2217, XP_017170564.1, XP_017170565.1 lcl|GPHN_29:8-2323_ORF1_GPHN_29:7:2322, XP_017170567.1, XP_030102591.1 lcl|GPHN_8:8-2281_ORF1_GPHN_8:7:2280, XP_030102593.1 lcl|GPHN_2:8-1945_ORF1_GPHN_2:7:1944, lcl|GPHN_101:8-994_ORF2_GPHN_101:7:993, lcl|GPHN_102:8-943_ORF2_GPHN_10…
GTHMGPSEI	GTHMGPSEI		31.5	927.412	1	464.714	19.05	NP_666077.2 lcl|GPHN_4:8-2326_ORF1_GPHN_4:7:2325, XP_006515962.1, XP_006515963.1, XP_006515964.1, XP_006515965.1, XP_006515966.1, XP_006515967.1, XP_006515968.1 lcl|GPHN_38:8-2365_ORF1_GPHN_38:7:2364, XP_006515969.1 lcl|GPHN_3:8-2257_ORF1_GPHN_3:7:2256, XP_006515970.1 lcl|GPHN_1:8-2218_ORF1_GPHN_1:7:2217, XP_017170562.1, XP_017170563.1, XP_017170564.1, XP_017170565.1 lcl|GPHN_29:8-2323_ORF1_GPHN_…
GTHMGPSEI	GTHM(+15.99)GPSEI	M4:Oxidation (M):1000.00	25.71	943.407	-1.3	472.71	15.79	NP_666077.2 lcl|GPHN_4:8-2326_ORF1_GPHN_4:7:2325, XP_006515962.1, XP_006515963.1, XP_006515964.1, XP_006515965.1, XP_006515966.1, XP_006515967.1, XP_006515968.1 lcl|GPHN_38:8-2365_ORF1_GPHN_38:7:2364, XP_006515969.1 lcl|GPHN_3:8-2257_ORF1_GPHN_3:7:2256, XP_006515970.1 lcl|GPHN_1:8-2218_ORF1_GPHN_1:7:2217, XP_017170562.1, XP_017170563.1, XP_017170564.1, XP_017170565.1 lcl|GPHN_29:8-2323_ORF1_GPHN_…
GTHMGPSEIG	GTHMGPSEIG		35.25	984.433	0.3	493.224	18.35	NP_666077.2 lcl|GPHN_4:8-2326_ORF1_GPHN_4:7:2325, XP_006515962.1, XP_006515963.1, XP_006515964.1, XP_006515965.1, XP_006515966.1, XP_006515967.1, XP_006515968.1 lcl|GPHN_38:8-2365_ORF1_GPHN_38:7:2364, XP_006515969.1 lcl|GPHN_3:8-2257_ORF1_GPHN_3:7:2256, XP_006515970.1 lcl|GPHN_1:8-2218_ORF1_GPHN_1:7:2217, XP_017170562.1, XP_017170563.1, XP_017170564.1, XP_017170565.1 lcl|GPHN_29:8-2323_ORF1_GPHN_…
GTHMGPSEIG	GTHM(+15.99)GPSEIG	M4:Oxidation (M):1000.00	28.47	1000.43	0.8	501.222	15.18	NP_666077.2 lcl|GPHN_4:8-2326_ORF1_GPHN_4:7:2325, XP_006515962.1, XP_006515963.1, XP_006515964.1, XP_006515965.1, XP_006515966.1, XP_006515967.1, XP_006515968.1 lcl|GPHN_38:8-2365_ORF1_GPHN_38:7:2364, XP_006515969.1 lcl|GPHN_3:8-2257_ORF1_GPHN_3:7:2256, XP_006515970.1 lcl|GPHN_1:8-2218_ORF1_GPHN_1:7:2217, XP_017170562.1, XP_017170563.1, XP_017170564.1, XP_017170565.1 lcl|GPHN_29:8-2323_ORF1_GPHN_…
GTHMGPSEIGL	GTHM(+15.99)GPSEIGL	M4:Oxidation (M):1000.00	32.73	1113.51	0.1	557.764	21.7	NP_666077.2 lcl|GPHN_4:8-2326_ORF1_GPHN_4:7:2325, XP_006515962.1, XP_006515963.1, XP_006515964.1, XP_006515965.1, XP_006515966.1, XP_006515967.1, XP_006515968.1 lcl|GPHN_38:8-2365_ORF1_GPHN_38:7:2364, XP_006515969.1 lcl|GPHN_3:8-2257_ORF1_GPHN_3:7:2256, XP_006515970.1 lcl|GPHN_1:8-2218_ORF1_GPHN_1:7:2217, XP_017170562.1, XP_017170563.1, XP_017170564.1, XP_017170565.1 lcl|GPHN_29:8-2323_ORF1_GPHN_…
GTHMGPSEIGL	GTHMGPSEIGL		31.54	1097.52	-1.9	549.765	24.4	NP_666077.2 lcl|GPHN_4:8-2326_ORF1_GPHN_4:7:2325, XP_006515962.1, XP_006515963.1, XP_006515964.1, XP_006515965.1, XP_006515966.1, XP_006515967.1, XP_006515968.1 lcl|GPHN_38:8-2365_ORF1_GPHN_38:7:2364, XP_006515969.1 lcl|GPHN_3:8-2257_ORF1_GPHN_3:7:2256, XP_006515970.1 lcl|GPHN_1:8-2218_ORF1_GPHN_1:7:2217, XP_017170562.1, XP_017170563.1, XP_017170564.1, XP_017170565.1 lcl|GPHN_29:8-2323_ORF1_GPHN_…
GTHMGPSEIGLL	GTHMGPSEIGLL		34.78	1210.6	-0.9	606.308	27.45	NP_666077.2 lcl|GPHN_4:8-2326_ORF1_GPHN_4:7:2325, XP_006515962.1, XP_006515963.1, XP_006515964.1, XP_006515965.1, XP_006515966.1, XP_006515967.1, XP_006515968.1 lcl|GPHN_38:8-2365_ORF1_GPHN_38:7:2364, XP_006515969.1 lcl|GPHN_3:8-2257_ORF1_GPHN_3:7:2256, XP_006515970.1 lcl|GPHN_1:8-2218_ORF1_GPHN_1:7:2217, XP_017170562.1, XP_017170563.1, XP_017170564.1, XP_017170565.1 lcl|GPHN_29:8-2323_ORF1_GPHN_…
GTHMGPSEIGLL	GTHM(+15.99)GPSEIGLL	M4:Oxidation (M):1000.00	30.4	1226.6	1.1	614.306	25.36	NP_666077.2 lcl|GPHN_4:8-2326_ORF1_GPHN_4:7:2325, XP_006515962.1, XP_006515963.1, XP_006515964.1, XP_006515965.1, XP_006515966.1, XP_006515967.1, XP_006515968.1 lcl|GPHN_38:8-2365_ORF1_GPHN_38:7:2364, XP_006515969.1 lcl|GPHN_3:8-2257_ORF1_GPHN_3:7:2256, XP_006515970.1 lcl|GPHN_1:8-2218_ORF1_GPHN_1:7:2217, XP_017170562.1, XP_017170563.1, XP_017170564.1, XP_017170565.1 lcl|GPHN_29:8-2323_ORF1_GPHN_…
GTHMGPSEIGLLA	GTHMGPSEIGLLA		27.83	1281.64	5.2	641.83	27.27	NP_666077.2 lcl|GPHN_4:8-2326_ORF1_GPHN_4:7:2325, XP_006515962.1, XP_006515963.1, XP_006515964.1, XP_006515965.1, XP_006515966.1, XP_006515967.1, XP_006515968.1 lcl|GPHN_38:8-2365_ORF1_GPHN_38:7:2364, XP_006515969.1 lcl|GPHN_3:8-2257_ORF1_GPHN_3:7:2256, XP_006515970.1 lcl|GPHN_1:8-2218_ORF1_GPHN_1:7:2217, XP_017170562.1, XP_017170563.1, XP_017170564.1, XP_017170565.1 lcl|GPHN_29:8-2323_ORF1_GPHN_…
GTHMGPSEIGLLAT	GTHM(+15.99)GPSEIGLLAT	M4:Oxidation (M):1000.00	26.73	1398.68	0.2	700.348	25.43	NP_666077.2 lcl|GPHN_4:8-2326_ORF1_GPHN_4:7:2325, XP_006515962.1, XP_006515963.1, XP_006515964.1, XP_006515965.1, XP_006515966.1, XP_006515967.1, XP_006515968.1 lcl|GPHN_38:8-2365_ORF1_GPHN_38:7:2364, XP_006515969.1 lcl|GPHN_3:8-2257_ORF1_GPHN_3:7:2256, XP_006515970.1 lcl|GPHN_1:8-2218_ORF1_GPHN_1:7:2217, XP_017170562.1, XP_017170563.1, XP_017170564.1, XP_017170565.1 lcl|GPHN_29:8-2323_ORF1_GPHN_…
GTHMGPSEIGLLATV	GTHM(+15.99)GPSEIGLLATV	M4:Oxidation (M):1000.00	27.75	1497.75	-0.4	749.882	28.64	NP_666077.2 lcl|GPHN_4:8-2326_ORF1_GPHN_4:7:2325, XP_006515962.1, XP_006515963.1, XP_006515964.1, XP_006515965.1, XP_006515966.1, XP_006515967.1, XP_006515968.1 lcl|GPHN_38:8-2365_ORF1_GPHN_38:7:2364, XP_006515969.1 lcl|GPHN_3:8-2257_ORF1_GPHN_3:7:2256, XP_006515970.1 lcl|GPHN_1:8-2218_ORF1_GPHN_1:7:2217, XP_017170562.1, XP_017170563.1, XP_017170564.1, XP_017170565.1 lcl|GPHN_29:8-2323_ORF1_GPHN_…
GTHMGPSEIGLLATVGVT	GTHMGPSEIGLLATVGVT		41.1	1738.89	3.1	870.456	31.7	NP_666077.2 lcl|GPHN_4:8-2326_ORF1_GPHN_4:7:2325, XP_006515962.1, XP_006515963.1, XP_006515964.1, XP_006515965.1, XP_006515966.1, XP_006515967.1, XP_006515968.1 lcl|GPHN_38:8-2365_ORF1_GPHN_38:7:2364, XP_006515969.1 lcl|GPHN_3:8-2257_ORF1_GPHN_3:7:2256, XP_006515970.1 lcl|GPHN_1:8-2218_ORF1_GPHN_1:7:2217, XP_017170562.1, XP_017170563.1, XP_017170564.1, XP_017170565.1 lcl|GPHN_29:8-2323_ORF1_GPHN_…
GTHMGPSEIGLLATVGVT	GTHM(+15.99)GPSEIGLLATVGVT	M4:Oxidation (M):1000.00	35.72	1754.89	-0.6	878.45	30.38	NP_666077.2 lcl|GPHN_4:8-2326_ORF1_GPHN_4:7:2325, XP_006515962.1, XP_006515963.1, XP_006515964.1, XP_006515965.1, XP_006515966.1, XP_006515967.1, XP_006515968.1 lcl|GPHN_38:8-2365_ORF1_GPHN_38:7:2364, XP_006515969.1 lcl|GPHN_3:8-2257_ORF1_GPHN_3:7:2256, XP_006515970.1 lcl|GPHN_1:8-2218_ORF1_GPHN_1:7:2217, XP_017170562.1, XP_017170563.1, XP_017170564.1, XP_017170565.1 lcl|GPHN_29:8-2323_ORF1_GPHN_…
GTHMGPSEIGLLATVGVTEVEVN	GTHM(+15.99)GPSEIGLLATVGVTEVEVN	M4:Oxidation (M):1000.00	24.56	2325.15	-0.5	1163.58	32.68	NP_666077.2 lcl|GPHN_4:8-2326_ORF1_GPHN_4:7:2325, XP_006515962.1, XP_006515963.1, XP_006515964.1, XP_006515965.1, XP_006515966.1, XP_006515967.1, XP_006515968.1 lcl|GPHN_38:8-2365_ORF1_GPHN_38:7:2364, XP_006515969.1 lcl|GPHN_3:8-2257_ORF1_GPHN_3:7:2256, XP_006515970.1 lcl|GPHN_1:8-2218_ORF1_GPHN_1:7:2217, XP_017170562.1, XP_017170563.1, XP_017170564.1, XP_017170565.1 lcl|GPHN_29:8-2323_ORF1_GPHN_…
GTHMGPSEIGLLATVGVTEVEVN	GTHMGPSEIGLLATVGVTEVEVN		23.69	2309.16	1.2	770.727	33.87	NP_666077.2 lcl|GPHN_4:8-2326_ORF1_GPHN_4:7:2325, XP_006515962.1, XP_006515963.1, XP_006515964.1, XP_006515965.1, XP_006515966.1, XP_006515967.1, XP_006515968.1 lcl|GPHN_38:8-2365_ORF1_GPHN_38:7:2364, XP_006515969.1 lcl|GPHN_3:8-2257_ORF1_GPHN_3:7:2256, XP_006515970.1 lcl|GPHN_1:8-2218_ORF1_GPHN_1:7:2217, XP_017170562.1, XP_017170563.1, XP_017170564.1, XP_017170565.1 lcl|GPHN_29:8-2323_ORF1_GPHN_…
GTHMGPSEIGLLATVGVTEVEVNK	GTHMGPSEIGLLATVGVTEVEVNK		48	2437.25	1.4	813.426	30.98	NP_666077.2 lcl|GPHN_4:8-2326_ORF1_GPHN_4:7:2325, XP_006515962.1, XP_006515963.1, XP_006515964.1, XP_006515965.1, XP_006515966.1, XP_006515967.1, XP_006515968.1 lcl|GPHN_38:8-2365_ORF1_GPHN_38:7:2364, XP_006515969.1 lcl|GPHN_3:8-2257_ORF1_GPHN_3:7:2256, XP_006515970.1 lcl|GPHN_1:8-2218_ORF1_GPHN_1:7:2217, XP_017170562.1, XP_017170563.1, XP_017170564.1, XP_017170565.1 lcl|GPHN_29:8-2323_ORF1_GPHN_…
GTHMGPSEIGLLATVGVTEVEVNK	GTHM(+15.99)GPSEIGLLATVGVTEVEVNK	M4:Oxidation (M):1000.00	44.11	2453.25	5.4	818.761	29.68	NP_666077.2 lcl|GPHN_4:8-2326_ORF1_GPHN_4:7:2325, XP_006515962.1, XP_006515963.1, XP_006515964.1, XP_006515965.1, XP_006515966.1, XP_006515967.1, XP_006515968.1 lcl|GPHN_38:8-2365_ORF1_GPHN_38:7:2364, XP_006515969.1 lcl|GPHN_3:8-2257_ORF1_GPHN_3:7:2256, XP_006515970.1 lcl|GPHN_1:8-2218_ORF1_GPHN_1:7:2217, XP_017170562.1, XP_017170563.1, XP_017170564.1, XP_017170565.1 lcl|GPHN_29:8-2323_ORF1_GPHN_…
GTHMGPSEIGLLATVGVTEVEVNKFPVVA	GTHM(+15.99)GPSEIGLLATVGVTEVEVNKFPVVA	M4:Oxidation (M):1000.00	28.19	2966.54	0.6	989.855	34.05	NP_666077.2 lcl|GPHN_4:8-2326_ORF1_GPHN_4:7:2325, XP_006515962.1, XP_006515963.1, XP_006515964.1, XP_006515965.1, XP_006515966.1, XP_006515967.1, XP_006515968.1 lcl|GPHN_38:8-2365_ORF1_GPHN_38:7:2364, XP_006515969.1 lcl|GPHN_3:8-2257_ORF1_GPHN_3:7:2256, XP_006515970.1 lcl|GPHN_1:8-2218_ORF1_GPHN_1:7:2217, XP_017170562.1, XP_017170563.1, XP_017170564.1, XP_017170565.1 lcl|GPHN_29:8-2323_ORF1_GPHN_…
GTHMGPSEIGLLATVGVTEVEVNKFPVVAVM	GTHM(+15.99)GPSEIGLLATVGVTEVEVNKFPVVAVM(+15.99)	M4:Oxidation (M):1000.00;M31:Oxidation (M):1000.00	31.32	3212.65	-1	1071.89	34.5	NP_666077.2 lcl|GPHN_4:8-2326_ORF1_GPHN_4:7:2325, XP_006515962.1, XP_006515963.1, XP_006515964.1, XP_006515965.1, XP_006515966.1, XP_006515967.1, XP_006515968.1 lcl|GPHN_38:8-2365_ORF1_GPHN_38:7:2364, XP_006515969.1 lcl|GPHN_3:8-2257_ORF1_GPHN_3:7:2256, XP_006515970.1 lcl|GPHN_1:8-2218_ORF1_GPHN_1:7:2217, XP_017170562.1, XP_017170563.1, XP_017170564.1, XP_017170565.1 lcl|GPHN_29:8-2323_ORF1_GPHN_…
GTHMGPSEIGLLATVGVTEVEVNKFPVVAVM	GTHM(+15.99)GPSEIGLLATVGVTEVEVNKFPVVAVM	M4:Oxidation (M):45.06	28.96	3196.65	-2.3	1066.56	36.19	NP_666077.2 lcl|GPHN_4:8-2326_ORF1_GPHN_4:7:2325, XP_006515962.1, XP_006515963.1, XP_006515964.1, XP_006515965.1, XP_006515966.1, XP_006515967.1, XP_006515968.1 lcl|GPHN_38:8-2365_ORF1_GPHN_38:7:2364, XP_006515969.1 lcl|GPHN_3:8-2257_ORF1_GPHN_3:7:2256, XP_006515970.1 lcl|GPHN_1:8-2218_ORF1_GPHN_1:7:2217, XP_017170562.1, XP_017170563.1, XP_017170564.1, XP_017170565.1 lcl|GPHN_29:8-2323_ORF1_GPHN_…
GTHMGPSEIGLLATVGVTEVEVNKFPVVAVM	GTHMGPSEIGLLATVGVTEVEVNKFPVVAVM(+15.99)	M31:Oxidation (M):47.67	19.3	3196.65	-0.1	1066.56	35.42	NP_666077.2 lcl|GPHN_4:8-2326_ORF1_GPHN_4:7:2325, XP_006515962.1, XP_006515963.1, XP_006515964.1, XP_006515965.1, XP_006515966.1, XP_006515967.1, XP_006515968.1 lcl|GPHN_38:8-2365_ORF1_GPHN_38:7:2364, XP_006515969.1 lcl|GPHN_3:8-2257_ORF1_GPHN_3:7:2256, XP_006515970.1 lcl|GPHN_1:8-2218_ORF1_GPHN_1:7:2217, XP_017170562.1, XP_017170563.1, XP_017170564.1, XP_017170565.1 lcl|GPHN_29:8-2323_ORF1_GPHN_…
GTHMGPSEIGLLATVGVTEVEVNKFPVVAVMSTGNELLNPEDDLLPGK	GTHM(+15.99)GPSEIGLLATVGVTEVEVNKFPVVAVM(+15.99)STGNELLNPEDDLLPGK	M4:Oxidation (M):1000.00;M31:Oxidation (M):1000.00	37.77	5005.53	-1.3	1252.39	36.01	NP_666077.2 lcl|GPHN_4:8-2326_ORF1_GPHN_4:7:2325, XP_006515962.1, XP_006515963.1, XP_006515964.1, XP_006515965.1, XP_006515966.1, XP_006515967.1, XP_006515968.1 lcl|GPHN_38:8-2365_ORF1_GPHN_38:7:2364, XP_006515969.1 lcl|GPHN_3:8-2257_ORF1_GPHN_3:7:2256, XP_006515970.1 lcl|GPHN_1:8-2218_ORF1_GPHN_1:7:2217, XP_017170562.1, XP_017170563.1, XP_017170564.1, XP_017170565.1 lcl|GPHN_29:8-2323_ORF1_GPHN_…
GVASTEDSSSSHITAAALAAK	GVASTEDSSSSHITAAALAAK		38.08	1972.97	0.5	658.664	20.83	NP_666077.2 lcl|GPHN_4:8-2326_ORF1_GPHN_4:7:2325, XP_006515962.1, XP_006515963.1, XP_006515964.1, XP_006515965.1, XP_006515966.1, XP_006515967.1, XP_006515968.1 lcl|GPHN_38:8-2365_ORF1_GPHN_38:7:2364, XP_006515969.1 lcl|GPHN_3:8-2257_ORF1_GPHN_3:7:2256, XP_006515970.1 lcl|GPHN_1:8-2218_ORF1_GPHN_1:7:2217, XP_017170562.1, XP_017170563.1, XP_017170564.1, XP_017170565.1 lcl|GPHN_29:8-2323_ORF1_GPHN_…
GVLTDGMGRVLAQDVYAKDNLPPFPA	GVLT(+79.97)DGMGRVLAQDVYAKDNLPPFPA	T4:Phosphorylation (STY):10.83	29.38	2823.37	0.2	706.849	28.4	lcl|GPHN_245:8-913_ORF1_GPHN_245:7:912, lcl|GPHN_7:8-1237_ORF1_GPHN_7:7:1236
GVQCEEEEEEK	GVQC(+57.02)EEEEEEK	C4:Carbamidomethylation:1000.00	31.62	1364.54	1	683.278	14.56	NP_666077.2 lcl|GPHN_4:8-2326_ORF1_GPHN_4:7:2325, XP_006515962.1, XP_006515963.1, XP_006515964.1, XP_006515965.1, XP_006515966.1, XP_006515967.1, XP_006515968.1 lcl|GPHN_38:8-2365_ORF1_GPHN_38:7:2364, XP_006515969.1 lcl|GPHN_3:8-2257_ORF1_GPHN_3:7:2256, XP_006515970.1 lcl|GPHN_1:8-2218_ORF1_GPHN_1:7:2217, XP_017170562.1, XP_017170563.1, XP_017170564.1, XP_017170565.1 lcl|GPHN_29:8-2323_ORF1_GPHN_…
GVQCEEEEEEKK	GVQC(+57.02)EEEEEEKK	C4:Carbamidomethylation:1000.00	37.7	1492.64	2.7	498.554	13.22	NP_666077.2 lcl|GPHN_4:8-2326_ORF1_GPHN_4:7:2325, XP_006515962.1, XP_006515963.1, XP_006515964.1, XP_006515965.1, XP_006515966.1, XP_006515967.1, XP_006515968.1 lcl|GPHN_38:8-2365_ORF1_GPHN_38:7:2364, XP_006515969.1 lcl|GPHN_3:8-2257_ORF1_GPHN_3:7:2256, XP_006515970.1 lcl|GPHN_1:8-2218_ORF1_GPHN_1:7:2217, XP_017170562.1, XP_017170563.1, XP_017170564.1, XP_017170565.1 lcl|GPHN_29:8-2323_ORF1_GPHN_…
GVQCEEEEEEKKD	GVQC(+57.02)EEEEEEKKD	C4:Carbamidomethylation:1000.00	29.82	1607.66	0.5	536.895	13.76	NP_666077.2 lcl|GPHN_4:8-2326_ORF1_GPHN_4:7:2325, XP_006515962.1, XP_006515963.1, XP_006515964.1, XP_006515965.1, XP_006515966.1, XP_006515967.1, XP_006515968.1 lcl|GPHN_38:8-2365_ORF1_GPHN_38:7:2364, XP_006515969.1 lcl|GPHN_3:8-2257_ORF1_GPHN_3:7:2256, XP_006515970.1 lcl|GPHN_1:8-2218_ORF1_GPHN_1:7:2217, XP_017170562.1, XP_017170563.1, XP_017170564.1, XP_017170565.1 lcl|GPHN_29:8-2323_ORF1_GPHN_…
GVQCEEEEEEKKDSGVA	GVQC(+57.02)EEEEEEKKDSGVA	C4:Carbamidomethylation:1000.00	29.34	1921.82	0.5	641.615	16.45	NP_666077.2 lcl|GPHN_4:8-2326_ORF1_GPHN_4:7:2325, XP_006515962.1, XP_006515963.1, XP_006515964.1, XP_006515965.1, XP_006515966.1, XP_006515967.1, XP_006515968.1 lcl|GPHN_38:8-2365_ORF1_GPHN_38:7:2364, XP_006515969.1 lcl|GPHN_3:8-2257_ORF1_GPHN_3:7:2256, XP_006515970.1 lcl|GPHN_1:8-2218_ORF1_GPHN_1:7:2217, XP_017170562.1, XP_017170563.1, XP_017170564.1, XP_017170565.1 lcl|GPHN_29:8-2323_ORF1_GPHN_…
GVQCEEEEEEKKDSGVAST	GVQC(+57.02)EEEEEEKKDSGVAST	C4:Carbamidomethylation:1000.00	24.1	2109.9	1.6	704.309	16.7	NP_666077.2 lcl|GPHN_4:8-2326_ORF1_GPHN_4:7:2325, XP_006515962.1, XP_006515963.1, XP_006515964.1, XP_006515965.1, XP_006515966.1, XP_006515967.1, XP_006515968.1 lcl|GPHN_38:8-2365_ORF1_GPHN_38:7:2364, XP_006515969.1 lcl|GPHN_3:8-2257_ORF1_GPHN_3:7:2256, XP_006515970.1 lcl|GPHN_1:8-2218_ORF1_GPHN_1:7:2217, XP_017170562.1, XP_017170563.1, XP_017170564.1, XP_017170565.1 lcl|GPHN_29:8-2323_ORF1_GPHN_…
GVQCEEEEEEKKDSGVASTEDSSSSH	GVQC(+57.02)EEEEEEKKDSGVASTEDSSSSH	C4:Carbamidomethylation:1000.00	43.98	2839.16	-0.5	710.796	16.46	NP_666077.2 lcl|GPHN_4:8-2326_ORF1_GPHN_4:7:2325, XP_006515962.1, XP_006515963.1, XP_006515964.1, XP_006515965.1, XP_006515966.1, XP_006515967.1, XP_006515968.1 lcl|GPHN_38:8-2365_ORF1_GPHN_38:7:2364, XP_006515969.1 lcl|GPHN_3:8-2257_ORF1_GPHN_3:7:2256, XP_006515970.1 lcl|GPHN_1:8-2218_ORF1_GPHN_1:7:2217, XP_017170562.1, XP_017170563.1, XP_017170564.1, XP_017170565.1 lcl|GPHN_29:8-2323_ORF1_GPHN_…
GVQCEEEEEEKKDSGVASTEDSSSSH	G(+42.01)VQCEEEEEEKKDSGVASTEDSSSSH	G1:Acetylation (Protein N-term):1000.00	37.54	2824.15	0.7	707.044	16.16	NP_666077.2 lcl|GPHN_4:8-2326_ORF1_GPHN_4:7:2325, XP_006515962.1, XP_006515963.1, XP_006515964.1, XP_006515965.1, XP_006515966.1, XP_006515967.1, XP_006515968.1 lcl|GPHN_38:8-2365_ORF1_GPHN_38:7:2364, XP_006515969.1 lcl|GPHN_3:8-2257_ORF1_GPHN_3:7:2256, XP_006515970.1 lcl|GPHN_1:8-2218_ORF1_GPHN_1:7:2217, XP_017170562.1, XP_017170563.1, XP_017170564.1, XP_017170565.1 lcl|GPHN_29:8-2323_ORF1_GPHN_…
GVQCEEEEEEKKDSGVASTEDSSSSHIT	GVQC(+57.02)EEEEEEKKDSGVASTEDSSSSHIT	C4:Carbamidomethylation:1000.00	36.4	3053.29	2.9	764.332	18.01	NP_666077.2 lcl|GPHN_4:8-2326_ORF1_GPHN_4:7:2325, XP_006515962.1, XP_006515963.1, XP_006515964.1, XP_006515965.1, XP_006515966.1, XP_006515967.1, XP_006515968.1 lcl|GPHN_38:8-2365_ORF1_GPHN_38:7:2364, XP_006515969.1 lcl|GPHN_3:8-2257_ORF1_GPHN_3:7:2256, XP_006515970.1 lcl|GPHN_1:8-2218_ORF1_GPHN_1:7:2217, XP_017170562.1, XP_017170563.1, XP_017170564.1, XP_017170565.1 lcl|GPHN_29:8-2323_ORF1_GPHN_…
GVQCEEEEEEKKDSGVASTEDSSSSHITAA	GVQC(+57.02)EEEEEEKKDSGVASTEDSSSSHITAA	C4:Carbamidomethylation:1000.00	40.47	3195.36	1	1066.13	18.65	NP_666077.2 lcl|GPHN_4:8-2326_ORF1_GPHN_4:7:2325, XP_006515962.1, XP_006515963.1, XP_006515964.1, XP_006515965.1, XP_006515966.1, XP_006515967.1, XP_006515968.1 lcl|GPHN_38:8-2365_ORF1_GPHN_38:7:2364, XP_006515969.1 lcl|GPHN_3:8-2257_ORF1_GPHN_3:7:2256, XP_006515970.1 lcl|GPHN_1:8-2218_ORF1_GPHN_1:7:2217, XP_017170562.1, XP_017170563.1, XP_017170564.1, XP_017170565.1 lcl|GPHN_29:8-2323_ORF1_GPHN_…
GVQCEEEEEEKKDSGVASTEDSSSSHITAAAL	GVQC(+57.02)EEEEEEKKDSGVASTEDSSSSHITAAAL	C4:Carbamidomethylation:1000.00	51.47	3379.48	2.7	845.881	21.5	NP_666077.2 lcl|GPHN_4:8-2326_ORF1_GPHN_4:7:2325, XP_006515962.1, XP_006515963.1, XP_006515964.1, XP_006515965.1, XP_006515966.1, XP_006515967.1, XP_006515968.1 lcl|GPHN_38:8-2365_ORF1_GPHN_38:7:2364, XP_006515969.1 lcl|GPHN_3:8-2257_ORF1_GPHN_3:7:2256, XP_006515970.1 lcl|GPHN_1:8-2218_ORF1_GPHN_1:7:2217, XP_017170562.1, XP_017170563.1, XP_017170564.1, XP_017170565.1 lcl|GPHN_29:8-2323_ORF1_GPHN_…
GVQCEEEEEEKKDSGVASTEDSSSSHITAAALAAK	GVQC(+57.02)EEEEEEKKDSGVASTEDSSSSHITAAALAAK	C4:Carbamidomethylation:1000.00	66.63	3649.65	1	1217.56	20.61	NP_666077.2 lcl|GPHN_4:8-2326_ORF1_GPHN_4:7:2325, XP_006515962.1, XP_006515963.1, XP_006515964.1, XP_006515965.1, XP_006515966.1, XP_006515967.1, XP_006515968.1 lcl|GPHN_38:8-2365_ORF1_GPHN_38:7:2364, XP_006515969.1 lcl|GPHN_3:8-2257_ORF1_GPHN_3:7:2256, XP_006515970.1 lcl|GPHN_1:8-2218_ORF1_GPHN_1:7:2217, XP_017170562.1, XP_017170563.1, XP_017170564.1, XP_017170565.1 lcl|GPHN_29:8-2323_ORF1_GPHN_…
GVQCEEEEEEKKDSGVASTEDSSSSHITAAALAAK	GVQC(+57.02)EEEEEEKKDSGVAST(+79.97)EDSSSSHITAAALAAK	C4:Carbamidomethylation:1000.00;T19:Phosphorylation (STY):0.00	62.66	3729.62	-1.1	933.411	21.31	NP_666077.2 lcl|GPHN_4:8-2326_ORF1_GPHN_4:7:2325, XP_006515962.1, XP_006515963.1, XP_006515964.1, XP_006515965.1, XP_006515966.1, XP_006515967.1, XP_006515968.1 lcl|GPHN_38:8-2365_ORF1_GPHN_38:7:2364, XP_006515969.1 lcl|GPHN_3:8-2257_ORF1_GPHN_3:7:2256, XP_006515970.1 lcl|GPHN_1:8-2218_ORF1_GPHN_1:7:2217, XP_017170562.1, XP_017170563.1, XP_017170564.1, XP_017170565.1 lcl|GPHN_29:8-2323_ORF1_GPHN_…
GVQCEEEEEEKKDSGVASTEDSSSSHITAAALAAK	GVQC(+57.02)EEEEEEKKDSGVASTEDS(+79.97)SSSHITAAALAAK	C4:Carbamidomethylation:1000.00;S22:Phosphorylation (STY):0.00	56.22	3729.62	-1.1	933.411	21.31	NP_666077.2 lcl|GPHN_4:8-2326_ORF1_GPHN_4:7:2325, XP_006515962.1, XP_006515963.1, XP_006515964.1, XP_006515965.1, XP_006515966.1, XP_006515967.1, XP_006515968.1 lcl|GPHN_38:8-2365_ORF1_GPHN_38:7:2364, XP_006515969.1 lcl|GPHN_3:8-2257_ORF1_GPHN_3:7:2256, XP_006515970.1 lcl|GPHN_1:8-2218_ORF1_GPHN_1:7:2217, XP_017170562.1, XP_017170563.1, XP_017170564.1, XP_017170565.1 lcl|GPHN_29:8-2323_ORF1_GPHN_…
GVQCEEEEEEKKDSGVASTEDSSSSHITAAALAAK	GVQC(+57.02)EEEEEEKKDS(+79.97)GVASTEDSSSSHITAAALAAK	C4:Carbamidomethylation:1000.00;S14:Phosphorylation (STY):3.56	55.79	3729.62	-0.1	933.412	21.27	NP_666077.2 lcl|GPHN_4:8-2326_ORF1_GPHN_4:7:2325, XP_006515962.1, XP_006515963.1, XP_006515964.1, XP_006515965.1, XP_006515966.1, XP_006515967.1, XP_006515968.1 lcl|GPHN_38:8-2365_ORF1_GPHN_38:7:2364, XP_006515969.1 lcl|GPHN_3:8-2257_ORF1_GPHN_3:7:2256, XP_006515970.1 lcl|GPHN_1:8-2218_ORF1_GPHN_1:7:2217, XP_017170562.1, XP_017170563.1, XP_017170564.1, XP_017170565.1 lcl|GPHN_29:8-2323_ORF1_GPHN_…
GVQCEEEEEEKKDSGVASTEDSSSSHITAAALAAK	G(+42.01)VQC(+57.02)EEEEEEKKDSGVASTEDSSSSHITAAALAAK	G1:Acetylation (Protein N-term):1000.00;C4:Carbamidomethylation:1000.00	45.68	3691.66	3	923.926	20.94	NP_666077.2 lcl|GPHN_4:8-2326_ORF1_GPHN_4:7:2325, XP_006515962.1, XP_006515963.1, XP_006515964.1, XP_006515965.1, XP_006515966.1, XP_006515967.1, XP_006515968.1 lcl|GPHN_38:8-2365_ORF1_GPHN_38:7:2364, XP_006515969.1 lcl|GPHN_3:8-2257_ORF1_GPHN_3:7:2256, XP_006515970.1 lcl|GPHN_1:8-2218_ORF1_GPHN_1:7:2217, XP_017170562.1, XP_017170563.1, XP_017170564.1, XP_017170565.1 lcl|GPHN_29:8-2323_ORF1_GPHN_…
GVQCEEEEEEKKDSGVASTEDSSSSHITAAALAAK	GVQCEEEEEEKKDSGVASTEDSSSSHITAAALAAK		45.31	3592.63	5.6	719.538	20.28	NP_666077.2 lcl|GPHN_4:8-2326_ORF1_GPHN_4:7:2325, XP_006515962.1, XP_006515963.1, XP_006515964.1, XP_006515965.1, XP_006515966.1, XP_006515967.1, XP_006515968.1 lcl|GPHN_38:8-2365_ORF1_GPHN_38:7:2364, XP_006515969.1 lcl|GPHN_3:8-2257_ORF1_GPHN_3:7:2256, XP_006515970.1 lcl|GPHN_1:8-2218_ORF1_GPHN_1:7:2217, XP_017170562.1, XP_017170563.1, XP_017170564.1, XP_017170565.1 lcl|GPHN_29:8-2323_ORF1_GPHN_…
GVQCEEEEEEKKDSGVASTEDSSSSHITAAALAAK	GVQC(+57.02)EEEEEEKKDSGVAS(+79.97)T(+79.97)EDSSSSHITAAALAAK	C4:Carbamidomethylation:1000.00;S18:Phosphorylation (STY):0.00;T19:Phosphorylation (STY):0.00	30.27	3809.59	-0.5	953.403	22.28	NP_666077.2 lcl|GPHN_4:8-2326_ORF1_GPHN_4:7:2325, XP_006515962.1, XP_006515963.1, XP_006515964.1, XP_006515965.1, XP_006515966.1, XP_006515967.1, XP_006515968.1 lcl|GPHN_38:8-2365_ORF1_GPHN_38:7:2364, XP_006515969.1 lcl|GPHN_3:8-2257_ORF1_GPHN_3:7:2256, XP_006515970.1 lcl|GPHN_1:8-2218_ORF1_GPHN_1:7:2217, XP_017170562.1, XP_017170563.1, XP_017170564.1, XP_017170565.1 lcl|GPHN_29:8-2323_ORF1_GPHN_…
GVQVLPR	GVQVLPR		24.24	767.465	-1.2	384.74	23.62	NP_666077.2 lcl|GPHN_4:8-2326_ORF1_GPHN_4:7:2325, XP_006515962.1, XP_006515963.1, XP_006515964.1, XP_006515965.1, XP_006515966.1, XP_006515967.1, XP_006515968.1 lcl|GPHN_38:8-2365_ORF1_GPHN_38:7:2364, XP_006515969.1 lcl|GPHN_3:8-2257_ORF1_GPHN_3:7:2256, XP_006515970.1 lcl|GPHN_1:8-2218_ORF1_GPHN_1:7:2217, XP_017170562.1, XP_017170563.1, XP_017170564.1, XP_017170565.1 lcl|GPHN_29:8-2323_ORF1_GPHN_…
GVQVLPRD	GVQVLPRD		26.88	882.492	-1.1	442.253	20.03	NP_666077.2 lcl|GPHN_4:8-2326_ORF1_GPHN_4:7:2325, XP_006515962.1, XP_006515963.1, XP_006515964.1, XP_006515965.1, XP_006515966.1, XP_006515967.1, XP_006515968.1 lcl|GPHN_38:8-2365_ORF1_GPHN_38:7:2364, XP_006515969.1 lcl|GPHN_3:8-2257_ORF1_GPHN_3:7:2256, XP_006515970.1 lcl|GPHN_1:8-2218_ORF1_GPHN_1:7:2217, XP_017170562.1, XP_017170563.1, XP_017170564.1, XP_017170565.1 lcl|GPHN_29:8-2323_ORF1_GPHN_…
GVQVLPRDT	GVQVLPRDT		24.63	983.54	0.8	492.778	20.17	NP_666077.2 lcl|GPHN_4:8-2326_ORF1_GPHN_4:7:2325, XP_006515962.1, XP_006515963.1, XP_006515964.1, XP_006515965.1, XP_006515966.1, XP_006515967.1, XP_006515968.1 lcl|GPHN_38:8-2365_ORF1_GPHN_38:7:2364, XP_006515969.1 lcl|GPHN_3:8-2257_ORF1_GPHN_3:7:2256, XP_006515970.1 lcl|GPHN_1:8-2218_ORF1_GPHN_1:7:2217, XP_017170562.1, XP_017170563.1, XP_017170564.1, XP_017170565.1 lcl|GPHN_29:8-2323_ORF1_GPHN_…
GVQVLPRDTA	GVQVLPRDTA		25.31	1054.58	-0.3	528.296	20.57	NP_666077.2 lcl|GPHN_4:8-2326_ORF1_GPHN_4:7:2325, XP_006515962.1, XP_006515963.1, XP_006515964.1, XP_006515965.1, XP_006515966.1, XP_006515967.1, XP_006515968.1 lcl|GPHN_38:8-2365_ORF1_GPHN_38:7:2364, XP_006515969.1 lcl|GPHN_3:8-2257_ORF1_GPHN_3:7:2256, XP_006515970.1 lcl|GPHN_1:8-2218_ORF1_GPHN_1:7:2217, XP_017170562.1, XP_017170563.1, XP_017170564.1, XP_017170565.1 lcl|GPHN_29:8-2323_ORF1_GPHN_…
GVQVLPRDTAS	GVQVLPRDTAS		31.63	1141.61	2.4	571.813	20.32	NP_666077.2 lcl|GPHN_4:8-2326_ORF1_GPHN_4:7:2325, XP_006515962.1, XP_006515963.1, XP_006515964.1, XP_006515965.1, XP_006515966.1, XP_006515967.1, XP_006515968.1 lcl|GPHN_38:8-2365_ORF1_GPHN_38:7:2364, XP_006515969.1 lcl|GPHN_3:8-2257_ORF1_GPHN_3:7:2256, XP_006515970.1 lcl|GPHN_1:8-2218_ORF1_GPHN_1:7:2217, XP_017170562.1, XP_017170563.1, XP_017170564.1, XP_017170565.1 lcl|GPHN_29:8-2323_ORF1_GPHN_…
GVQVLPRDTASL	GVQVLPRDTASL		34.2	1254.69	0.1	628.354	24.69	NP_666077.2 lcl|GPHN_4:8-2326_ORF1_GPHN_4:7:2325, XP_006515962.1, XP_006515963.1, XP_006515964.1, XP_006515965.1, XP_006515966.1, XP_006515967.1, XP_006515968.1 lcl|GPHN_38:8-2365_ORF1_GPHN_38:7:2364, XP_006515969.1 lcl|GPHN_3:8-2257_ORF1_GPHN_3:7:2256, XP_006515970.1 lcl|GPHN_1:8-2218_ORF1_GPHN_1:7:2217, XP_017170562.1, XP_017170563.1, XP_017170564.1, XP_017170565.1 lcl|GPHN_29:8-2323_ORF1_GPHN_…
GVQVLPRDTASLS	GVQVLPRDTASLS		37.34	1341.73	1.3	671.871	23.81	NP_666077.2 lcl|GPHN_4:8-2326_ORF1_GPHN_4:7:2325, XP_006515962.1, XP_006515963.1, XP_006515964.1, XP_006515965.1, XP_006515966.1, XP_006515967.1, XP_006515968.1 lcl|GPHN_38:8-2365_ORF1_GPHN_38:7:2364, XP_006515969.1 lcl|GPHN_3:8-2257_ORF1_GPHN_3:7:2256, XP_006515970.1 lcl|GPHN_1:8-2218_ORF1_GPHN_1:7:2217, XP_017170562.1, XP_017170563.1, XP_017170564.1, XP_017170565.1 lcl|GPHN_29:8-2323_ORF1_GPHN_…
GVQVLPRDTASLSTTPSESPR	GVQVLPRDTASLSTTPSESPR		42.21	2197.13	-0.3	733.385	23.22	NP_666077.2 lcl|GPHN_4:8-2326_ORF1_GPHN_4:7:2325, XP_006515962.1, XP_006515963.1, XP_006515964.1, XP_006515965.1, XP_006515966.1, XP_006515967.1, XP_006515968.1 lcl|GPHN_38:8-2365_ORF1_GPHN_38:7:2364, XP_006515969.1 lcl|GPHN_3:8-2257_ORF1_GPHN_3:7:2256, XP_006515970.1 lcl|GPHN_1:8-2218_ORF1_GPHN_1:7:2217, XP_017170562.1, XP_017170563.1, XP_017170564.1, XP_017170565.1 lcl|GPHN_29:8-2323_ORF1_GPHN_…
GVSMGEKDY	GVSMGEKDY		30.53	984.422	0.5	493.219	18.24	NP_666077.2 lcl|GPHN_4:8-2326_ORF1_GPHN_4:7:2325, XP_006515962.1, XP_006515963.1, XP_006515964.1, XP_006515965.1, XP_006515966.1, XP_006515967.1, XP_006515968.1 lcl|GPHN_38:8-2365_ORF1_GPHN_38:7:2364, XP_006515969.1 lcl|GPHN_3:8-2257_ORF1_GPHN_3:7:2256, XP_006515970.1 lcl|GPHN_1:8-2218_ORF1_GPHN_1:7:2217, XP_017170562.1, XP_017170563.1, XP_017170564.1, XP_017170565.1 lcl|GPHN_29:8-2323_ORF1_GPHN_…
GVSMGEKDYLK	GVSM(+15.99)GEKDYLK	M4:Oxidation (M):1000.00	37.69	1241.6	-1.8	621.804	16.28	NP_666077.2 lcl|GPHN_4:8-2326_ORF1_GPHN_4:7:2325, XP_006515962.1, XP_006515963.1, XP_006515964.1, XP_006515965.1, XP_006515966.1, XP_006515967.1, XP_006515968.1 lcl|GPHN_38:8-2365_ORF1_GPHN_38:7:2364, XP_006515969.1 lcl|GPHN_3:8-2257_ORF1_GPHN_3:7:2256, XP_006515970.1 lcl|GPHN_1:8-2218_ORF1_GPHN_1:7:2217, XP_017170562.1, XP_017170563.1, XP_017170564.1, XP_017170565.1 lcl|GPHN_29:8-2323_ORF1_GPHN_…
GVTEVEVNKFPV	GVTEVEVNKFPV		39.95	1316.7	2.7	659.358	26.44	NP_666077.2 lcl|GPHN_4:8-2326_ORF1_GPHN_4:7:2325, XP_006515962.1, XP_006515963.1, XP_006515964.1, XP_006515965.1, XP_006515966.1, XP_006515967.1, XP_006515968.1 lcl|GPHN_38:8-2365_ORF1_GPHN_38:7:2364, XP_006515969.1 lcl|GPHN_3:8-2257_ORF1_GPHN_3:7:2256, XP_006515970.1 lcl|GPHN_1:8-2218_ORF1_GPHN_1:7:2217, XP_017170562.1, XP_017170563.1, XP_017170564.1, XP_017170565.1 lcl|GPHN_29:8-2323_ORF1_GPHN_…
GVTEVEVNKFPVV	GVTEVEVNKFPVV		41.72	1415.77	0.3	708.89	28.02	NP_666077.2 lcl|GPHN_4:8-2326_ORF1_GPHN_4:7:2325, XP_006515962.1, XP_006515963.1, XP_006515964.1, XP_006515965.1, XP_006515966.1, XP_006515967.1, XP_006515968.1 lcl|GPHN_38:8-2365_ORF1_GPHN_38:7:2364, XP_006515969.1 lcl|GPHN_3:8-2257_ORF1_GPHN_3:7:2256, XP_006515970.1 lcl|GPHN_1:8-2218_ORF1_GPHN_1:7:2217, XP_017170562.1, XP_017170563.1, XP_017170564.1, XP_017170565.1 lcl|GPHN_29:8-2323_ORF1_GPHN_…
GVTEVEVNKFPVVA	GVTEVEVNKFPVVA		44.71	1486.8	1.3	744.41	27.62	NP_666077.2 lcl|GPHN_4:8-2326_ORF1_GPHN_4:7:2325, XP_006515962.1, XP_006515963.1, XP_006515964.1, XP_006515965.1, XP_006515966.1, XP_006515967.1, XP_006515968.1 lcl|GPHN_38:8-2365_ORF1_GPHN_38:7:2364, XP_006515969.1 lcl|GPHN_3:8-2257_ORF1_GPHN_3:7:2256, XP_006515970.1 lcl|GPHN_1:8-2218_ORF1_GPHN_1:7:2217, XP_017170562.1, XP_017170563.1, XP_017170564.1, XP_017170565.1 lcl|GPHN_29:8-2323_ORF1_GPHN_…
GVTEVEVNKFPVVAV	GVTEVEVNKFPVVAV		44.52	1585.87	0.3	793.943	29.73	NP_666077.2 lcl|GPHN_4:8-2326_ORF1_GPHN_4:7:2325, XP_006515962.1, XP_006515963.1, XP_006515964.1, XP_006515965.1, XP_006515966.1, XP_006515967.1, XP_006515968.1 lcl|GPHN_38:8-2365_ORF1_GPHN_38:7:2364, XP_006515969.1 lcl|GPHN_3:8-2257_ORF1_GPHN_3:7:2256, XP_006515970.1 lcl|GPHN_1:8-2218_ORF1_GPHN_1:7:2217, XP_017170562.1, XP_017170563.1, XP_017170564.1, XP_017170565.1 lcl|GPHN_29:8-2323_ORF1_GPHN_…
GVTEVEVNKFPVVAVMSTGNELLNPEDDLLPGK	GVTEVEVNKFPVVAVM(+15.99)STGNELLNPEDDLLPGK	M16:Oxidation (M):1000.00	33.09	3525.79	3.3	1176.27	32.79	NP_666077.2 lcl|GPHN_4:8-2326_ORF1_GPHN_4:7:2325, XP_006515962.1, XP_006515963.1, XP_006515964.1, XP_006515965.1, XP_006515966.1, XP_006515967.1, XP_006515968.1 lcl|GPHN_38:8-2365_ORF1_GPHN_38:7:2364, XP_006515969.1 lcl|GPHN_3:8-2257_ORF1_GPHN_3:7:2256, XP_006515970.1 lcl|GPHN_1:8-2218_ORF1_GPHN_1:7:2217, XP_017170562.1, XP_017170563.1, XP_017170564.1, XP_017170565.1 lcl|GPHN_29:8-2323_ORF1_GPHN_…
GVTEVEVNKFPVVAVMSTGNELLNPEDDLLPGK	GVTEVEVNKFPVVAVMSTGNELLNPEDDLLPGK		18.36	3509.8	-1.2	1170.94	35.46	NP_666077.2 lcl|GPHN_4:8-2326_ORF1_GPHN_4:7:2325, XP_006515962.1, XP_006515963.1, XP_006515964.1, XP_006515965.1, XP_006515966.1, XP_006515967.1, XP_006515968.1 lcl|GPHN_38:8-2365_ORF1_GPHN_38:7:2364, XP_006515969.1 lcl|GPHN_3:8-2257_ORF1_GPHN_3:7:2256, XP_006515970.1 lcl|GPHN_1:8-2218_ORF1_GPHN_1:7:2217, XP_017170562.1, XP_017170563.1, XP_017170564.1, XP_017170565.1 lcl|GPHN_29:8-2323_ORF1_GPHN_…
GYDLRVQ	GYDLRVQ		30.47	849.434	-1.2	425.724	21.05	XP_006515962.1, XP_006515963.1, XP_006515964.1, XP_006515966.1, XP_006515967.1, XP_017170562.1, XP_017170563.1, XP_017170565.1 lcl|GPHN_29:8-2323_ORF1_GPHN_29:7:2322, XP_017170568.1, XP_030102590.1 lcl|GPHN_41:8-2320_ORF1_GPHN_41:7:2319, XP_030102591.1 lcl|GPHN_8:8-2281_ORF1_GPHN_8:7:2280, XP_030102592.1, lcl|GPHN_103:8-2287_ORF1_GPHN_103:7:2286, lcl|GPHN_106:8-1873_ORF1_GPHN_106:7:1872, lcl|GPHN…
GYDLRVQSR	GYDLRVQSR		32.65	1092.57	-2.1	365.196	17.84	XP_006515962.1, XP_006515963.1, XP_006515964.1, XP_006515966.1, XP_006515967.1, XP_017170562.1, XP_017170563.1, XP_017170565.1 lcl|GPHN_29:8-2323_ORF1_GPHN_29:7:2322, XP_017170568.1, XP_030102590.1 lcl|GPHN_41:8-2320_ORF1_GPHN_41:7:2319, XP_030102591.1 lcl|GPHN_8:8-2281_ORF1_GPHN_8:7:2280, XP_030102592.1, lcl|GPHN_103:8-2287_ORF1_GPHN_103:7:2286, lcl|GPHN_106:8-1873_ORF1_GPHN_106:7:1872, lcl|GPHN…
GYPTINLGIVGDNPDDLLNALNEGISR	GYPTINLGIVGDNPDDLLNALNEGISR		38.11	2839.44	-0.6	947.485	38.51	NP_666077.2 lcl|GPHN_4:8-2326_ORF1_GPHN_4:7:2325, XP_006515962.1, XP_006515963.1, XP_006515964.1, XP_006515965.1, XP_006515966.1, XP_006515967.1, XP_006515968.1 lcl|GPHN_38:8-2365_ORF1_GPHN_38:7:2364, XP_006515969.1 lcl|GPHN_3:8-2257_ORF1_GPHN_3:7:2256, XP_006515970.1 lcl|GPHN_1:8-2218_ORF1_GPHN_1:7:2217, XP_017170562.1, XP_017170563.1, XP_017170564.1, XP_017170565.1 lcl|GPHN_29:8-2323_ORF1_GPHN_…
HAIDLLR	HAIDLLR		25.16	836.487	-0.6	419.25	20.14	NP_666077.2 lcl|GPHN_4:8-2326_ORF1_GPHN_4:7:2325, XP_006515962.1, XP_006515963.1, XP_006515964.1, XP_006515965.1, XP_006515966.1, XP_006515967.1, XP_006515968.1 lcl|GPHN_38:8-2365_ORF1_GPHN_38:7:2364, XP_006515969.1 lcl|GPHN_3:8-2257_ORF1_GPHN_3:7:2256, XP_006515970.1 lcl|GPHN_1:8-2218_ORF1_GPHN_1:7:2217, XP_017170562.1, XP_017170563.1, XP_017170564.1, XP_017170565.1 lcl|GPHN_29:8-2323_ORF1_GPHN_…
HDELEDLPSPPPPLSPPPTTSPHKQTEDKGVQCEEEEEEKKDSGVA	HDELEDLPS(+79.97)PPPPLSPPPTTSPHKQTEDKGVQC(+57.02)EEEEEEKKDSGVA	S9:Phosphorylation (STY):0.00;C33:Carbamidomethylation:1000.00	42.92	5169.33	-1.5	862.561	23.52	NP_666077.2 lcl|GPHN_4:8-2326_ORF1_GPHN_4:7:2325, XP_006515962.1, XP_006515963.1, XP_006515964.1, XP_006515965.1, XP_006515966.1, XP_006515967.1, XP_006515968.1 lcl|GPHN_38:8-2365_ORF1_GPHN_38:7:2364, XP_006515969.1 lcl|GPHN_3:8-2257_ORF1_GPHN_3:7:2256, XP_006515970.1 lcl|GPHN_1:8-2218_ORF1_GPHN_1:7:2217, XP_017170562.1, XP_017170563.1, XP_017170564.1, XP_017170565.1 lcl|GPHN_29:8-2323_ORF1_GPHN_…
HDELEDLPSPPPPLSPPPTTSPHKQTEDKGVQCEEEEEEKKDSGVA	HDELEDLPS(+79.97)PPPPLSPPPTTSPHKQT(+79.97)EDKGVQC(+57.02)EEEEEEKKDSGVA	S9:Phosphorylation (STY):0.00;T26:Phosphorylation (STY):0.00;C33:Carbamidomethylation:1000.00	42.75	5249.29	0.1	875.89	24.3	NP_666077.2 lcl|GPHN_4:8-2326_ORF1_GPHN_4:7:2325, XP_006515962.1, XP_006515963.1, XP_006515964.1, XP_006515965.1, XP_006515966.1, XP_006515967.1, XP_006515968.1 lcl|GPHN_38:8-2365_ORF1_GPHN_38:7:2364, XP_006515969.1 lcl|GPHN_3:8-2257_ORF1_GPHN_3:7:2256, XP_006515970.1 lcl|GPHN_1:8-2218_ORF1_GPHN_1:7:2217, XP_017170562.1, XP_017170563.1, XP_017170564.1, XP_017170565.1 lcl|GPHN_29:8-2323_ORF1_GPHN_…
HDELEDLPSPPPPLSPPPTTSPHKQTEDKGVQCEEEEEEKKDSGVA	HDELEDLPS(+79.97)PPPPLS(+79.97)PPPTTSPHKQTEDKGVQC(+57.02)EEEEEEKKDSGVA	S9:Phosphorylation (STY):7.40;S15:Phosphorylation (STY):11.12;C33:Carbamidomethylation:1000.00	42.31	5249.29	0.4	1050.87	24.22	NP_666077.2 lcl|GPHN_4:8-2326_ORF1_GPHN_4:7:2325, XP_006515962.1, XP_006515963.1, XP_006515964.1, XP_006515965.1, XP_006515966.1, XP_006515967.1, XP_006515968.1 lcl|GPHN_38:8-2365_ORF1_GPHN_38:7:2364, XP_006515969.1 lcl|GPHN_3:8-2257_ORF1_GPHN_3:7:2256, XP_006515970.1 lcl|GPHN_1:8-2218_ORF1_GPHN_1:7:2217, XP_017170562.1, XP_017170563.1, XP_017170564.1, XP_017170565.1 lcl|GPHN_29:8-2323_ORF1_GPHN_…
HDELEDLPSPPPPLSPPPTTSPHKQTEDKGVQCEEEEEEKKDSGVA	HDELEDLPSPPPPLSPPPTTSPHKQTEDKGVQC(+57.02)EEEEEEKKDSGVA	C33:Carbamidomethylation:1000.00	29.93	5089.36	1.2	1018.88	22.81	NP_666077.2 lcl|GPHN_4:8-2326_ORF1_GPHN_4:7:2325, XP_006515962.1, XP_006515963.1, XP_006515964.1, XP_006515965.1, XP_006515966.1, XP_006515967.1, XP_006515968.1 lcl|GPHN_38:8-2365_ORF1_GPHN_38:7:2364, XP_006515969.1 lcl|GPHN_3:8-2257_ORF1_GPHN_3:7:2256, XP_006515970.1 lcl|GPHN_1:8-2218_ORF1_GPHN_1:7:2217, XP_017170562.1, XP_017170563.1, XP_017170564.1, XP_017170565.1 lcl|GPHN_29:8-2323_ORF1_GPHN_…
HDHQIRVG	HDHQIRVG		29.59	960.489	-0.5	481.252	12.46	NP_666077.2 lcl|GPHN_4:8-2326_ORF1_GPHN_4:7:2325, XP_006515962.1, XP_006515963.1, XP_006515964.1, XP_006515965.1, XP_006515966.1, XP_006515967.1, XP_006515968.1 lcl|GPHN_38:8-2365_ORF1_GPHN_38:7:2364, XP_006515969.1 lcl|GPHN_3:8-2257_ORF1_GPHN_3:7:2256, XP_006515970.1 lcl|GPHN_1:8-2218_ORF1_GPHN_1:7:2217, XP_017170562.1, XP_017170563.1, XP_017170564.1, XP_017170565.1 lcl|GPHN_29:8-2323_ORF1_GPHN_…
HDHQIRVGVL	HDHQIRVGVL		29.86	1172.64	-0.2	391.888	19.64	NP_666077.2 lcl|GPHN_4:8-2326_ORF1_GPHN_4:7:2325, XP_006515962.1, XP_006515963.1, XP_006515964.1, XP_006515965.1, XP_006515966.1, XP_006515967.1, XP_006515968.1 lcl|GPHN_38:8-2365_ORF1_GPHN_38:7:2364, XP_006515969.1 lcl|GPHN_3:8-2257_ORF1_GPHN_3:7:2256, XP_006515970.1 lcl|GPHN_1:8-2218_ORF1_GPHN_1:7:2217, XP_017170562.1, XP_017170563.1, XP_017170564.1, XP_017170565.1 lcl|GPHN_29:8-2323_ORF1_GPHN_…
HFGRVFMKPGLPT	HFGRVFMKPGLPT		38.84	1485.79	-1.8	496.27	23.18	NP_666077.2 lcl|GPHN_4:8-2326_ORF1_GPHN_4:7:2325, XP_006515962.1, XP_006515963.1, XP_006515964.1, XP_006515965.1, XP_006515966.1, XP_006515967.1, XP_006515968.1 lcl|GPHN_38:8-2365_ORF1_GPHN_38:7:2364, XP_006515969.1 lcl|GPHN_3:8-2257_ORF1_GPHN_3:7:2256, XP_006515970.1 lcl|GPHN_1:8-2218_ORF1_GPHN_1:7:2217, XP_017170562.1, XP_017170563.1, XP_017170564.1, XP_017170565.1 lcl|GPHN_29:8-2323_ORF1_GPHN_…
HFGRVFMKPGLPT	HFGRVFM(+15.99)KPGLPT	M7:Oxidation (M):1000.00	33.4	1501.79	-0.1	501.603	21.35	NP_666077.2 lcl|GPHN_4:8-2326_ORF1_GPHN_4:7:2325, XP_006515962.1, XP_006515963.1, XP_006515964.1, XP_006515965.1, XP_006515966.1, XP_006515967.1, XP_006515968.1 lcl|GPHN_38:8-2365_ORF1_GPHN_38:7:2364, XP_006515969.1 lcl|GPHN_3:8-2257_ORF1_GPHN_3:7:2256, XP_006515970.1 lcl|GPHN_1:8-2218_ORF1_GPHN_1:7:2217, XP_017170562.1, XP_017170563.1, XP_017170564.1, XP_017170565.1 lcl|GPHN_29:8-2323_ORF1_GPHN_…
HGQPIPGLIS	HGQPIPGLIS		21.08	1017.56	1.4	509.788	24.46	NP_666077.2 lcl|GPHN_4:8-2326_ORF1_GPHN_4:7:2325, XP_006515962.1, XP_006515963.1, XP_006515964.1, XP_006515965.1, XP_006515968.1 lcl|GPHN_38:8-2365_ORF1_GPHN_38:7:2364, XP_017170562.1, XP_017170563.1, XP_017170564.1, lcl|GPHN_101:8-994_ORF2_GPHN_101:7:993, lcl|GPHN_105:73-2247_ORF1_GPHN_105:72:2246, lcl|GPHN_119:441-2183_ORF3_GPHN_119:440:2182, lcl|GPHN_121:8-2368_ORF1_GPHN_121:7:2367, lcl|GPHN_1…
HGQPIPGLISYSHHATGSADK	HGQPIPGLISYSHHATGSADK		40.08	2172.07	-0.6	544.025	19.79	NP_666077.2 lcl|GPHN_4:8-2326_ORF1_GPHN_4:7:2325, XP_006515962.1, XP_006515963.1, XP_006515964.1, XP_006515965.1, XP_006515968.1 lcl|GPHN_38:8-2365_ORF1_GPHN_38:7:2364, XP_017170562.1, XP_017170563.1, XP_017170564.1, lcl|GPHN_101:8-994_ORF2_GPHN_101:7:993, lcl|GPHN_105:73-2247_ORF1_GPHN_105:72:2246, lcl|GPHN_119:441-2183_ORF3_GPHN_119:440:2182, lcl|GPHN_121:8-2368_ORF1_GPHN_121:7:2367, lcl|GPHN_1…
HGQPIPGLISYSHHATGSADKR	HGQPIPGLISYSHHATGSADKR		19.42	2328.17	0.5	466.642	20.07	NP_666077.2 lcl|GPHN_4:8-2326_ORF1_GPHN_4:7:2325, XP_006515962.1, XP_006515963.1, XP_006515964.1, XP_006515965.1, XP_006515968.1 lcl|GPHN_38:8-2365_ORF1_GPHN_38:7:2364, XP_017170562.1, XP_017170563.1, XP_017170564.1, lcl|GPHN_101:8-994_ORF2_GPHN_101:7:993, lcl|GPHN_105:73-2247_ORF1_GPHN_105:72:2246, lcl|GPHN_119:441-2183_ORF3_GPHN_119:440:2182, lcl|GPHN_121:8-2368_ORF1_GPHN_121:7:2367, lcl|GPHN_1…
HGYPTINL	HGYPTINL		21.64	913.466	-0.2	457.74	24.9	NP_666077.2 lcl|GPHN_4:8-2326_ORF1_GPHN_4:7:2325, XP_006515962.1, XP_006515963.1, XP_006515964.1, XP_006515965.1, XP_006515966.1, XP_006515967.1, XP_006515968.1 lcl|GPHN_38:8-2365_ORF1_GPHN_38:7:2364, XP_006515969.1 lcl|GPHN_3:8-2257_ORF1_GPHN_3:7:2256, XP_006515970.1 lcl|GPHN_1:8-2218_ORF1_GPHN_1:7:2217, XP_017170562.1, XP_017170563.1, XP_017170564.1, XP_017170565.1 lcl|GPHN_29:8-2323_ORF1_GPHN_…
HGYPTINLG	HGYPTINLG		20.39	970.487	1	486.251	23.92	NP_666077.2 lcl|GPHN_4:8-2326_ORF1_GPHN_4:7:2325, XP_006515962.1, XP_006515963.1, XP_006515964.1, XP_006515965.1, XP_006515966.1, XP_006515967.1, XP_006515968.1 lcl|GPHN_38:8-2365_ORF1_GPHN_38:7:2364, XP_006515969.1 lcl|GPHN_3:8-2257_ORF1_GPHN_3:7:2256, XP_006515970.1 lcl|GPHN_1:8-2218_ORF1_GPHN_1:7:2217, XP_017170562.1, XP_017170563.1, XP_017170564.1, XP_017170565.1 lcl|GPHN_29:8-2323_ORF1_GPHN_…
HHQEPLP	HHQEPLP		25.06	856.419	-2.5	429.216	14.5	NP_666077.2 lcl|GPHN_4:8-2326_ORF1_GPHN_4:7:2325, XP_006515962.1, XP_006515963.1, XP_006515964.1, XP_006515965.1, XP_006515966.1, XP_006515967.1, XP_006515968.1 lcl|GPHN_38:8-2365_ORF1_GPHN_38:7:2364, XP_006515969.1 lcl|GPHN_3:8-2257_ORF1_GPHN_3:7:2256, XP_006515970.1 lcl|GPHN_1:8-2218_ORF1_GPHN_1:7:2217, XP_017170562.1, XP_017170563.1, XP_017170564.1, XP_017170565.1 lcl|GPHN_29:8-2323_ORF1_GPHN_…
HHQEPLPW	HHQEPLPW		31.89	1042.5	0.1	348.507	21.95	NP_666077.2 lcl|GPHN_4:8-2326_ORF1_GPHN_4:7:2325, XP_006515962.1, XP_006515963.1, XP_006515964.1, XP_006515965.1, XP_006515966.1, XP_006515967.1, XP_006515968.1 lcl|GPHN_38:8-2365_ORF1_GPHN_38:7:2364, XP_006515969.1 lcl|GPHN_3:8-2257_ORF1_GPHN_3:7:2256, XP_006515970.1 lcl|GPHN_1:8-2218_ORF1_GPHN_1:7:2217, XP_017170562.1, XP_017170563.1, XP_017170564.1, XP_017170565.1 lcl|GPHN_29:8-2323_ORF1_GPHN_…
HHQEPLPWA	HHQEPLPWA		27.29	1113.54	-0.2	557.775	22.26	NP_666077.2 lcl|GPHN_4:8-2326_ORF1_GPHN_4:7:2325, XP_006515962.1, XP_006515963.1, XP_006515964.1, XP_006515965.1, XP_006515966.1, XP_006515967.1, XP_006515968.1 lcl|GPHN_38:8-2365_ORF1_GPHN_38:7:2364, XP_006515969.1 lcl|GPHN_3:8-2257_ORF1_GPHN_3:7:2256, XP_006515970.1 lcl|GPHN_1:8-2218_ORF1_GPHN_1:7:2217, XP_017170562.1, XP_017170563.1, XP_017170564.1, XP_017170565.1 lcl|GPHN_29:8-2323_ORF1_GPHN_…
HHQEPLPWAQ	HHQEPLPWAQ		36.93	1241.59	1.4	621.805	21.94	NP_666077.2 lcl|GPHN_4:8-2326_ORF1_GPHN_4:7:2325, XP_006515962.1, XP_006515963.1, XP_006515964.1, XP_006515965.1, XP_006515966.1, XP_006515967.1, XP_006515968.1 lcl|GPHN_38:8-2365_ORF1_GPHN_38:7:2364, XP_006515969.1 lcl|GPHN_3:8-2257_ORF1_GPHN_3:7:2256, XP_006515970.1 lcl|GPHN_1:8-2218_ORF1_GPHN_1:7:2217, XP_017170562.1, XP_017170563.1, XP_017170564.1, XP_017170565.1 lcl|GPHN_29:8-2323_ORF1_GPHN_…
HHQEPLPWAQS	HHQEPLPWAQS		38.46	1328.63	1.3	665.321	21.95	NP_666077.2 lcl|GPHN_4:8-2326_ORF1_GPHN_4:7:2325, XP_006515962.1, XP_006515963.1, XP_006515964.1, XP_006515965.1, XP_006515966.1, XP_006515967.1, XP_006515968.1 lcl|GPHN_38:8-2365_ORF1_GPHN_38:7:2364, XP_006515969.1 lcl|GPHN_3:8-2257_ORF1_GPHN_3:7:2256, XP_006515970.1 lcl|GPHN_1:8-2218_ORF1_GPHN_1:7:2217, XP_017170562.1, XP_017170563.1, XP_017170564.1, XP_017170565.1 lcl|GPHN_29:8-2323_ORF1_GPHN_…
HHQEPLPWAQSTGNQ	HHQEPLPWAQSTGNQ		44.05	1728.8	0.2	865.406	21.55	NP_666077.2 lcl|GPHN_4:8-2326_ORF1_GPHN_4:7:2325, XP_006515962.1, XP_006515963.1, XP_006515964.1, XP_006515965.1, XP_006515966.1, XP_006515967.1, XP_006515968.1 lcl|GPHN_38:8-2365_ORF1_GPHN_38:7:2364, XP_006515969.1 lcl|GPHN_3:8-2257_ORF1_GPHN_3:7:2256, XP_006515970.1 lcl|GPHN_1:8-2218_ORF1_GPHN_1:7:2217, XP_017170562.1, XP_017170563.1, XP_017170564.1, XP_017170565.1 lcl|GPHN_29:8-2323_ORF1_GPHN_…
HHQEPLPWAQSTGNQM	HHQEPLPWAQSTGNQM(+15.99)	M16:Oxidation (M):1000.00	47.77	1875.83	0.2	938.924	21.61	NP_666077.2 lcl|GPHN_4:8-2326_ORF1_GPHN_4:7:2325, XP_006515962.1, XP_006515963.1, XP_006515964.1, XP_006515965.1, XP_006515966.1, XP_006515967.1, XP_006515968.1 lcl|GPHN_38:8-2365_ORF1_GPHN_38:7:2364, XP_006515969.1 lcl|GPHN_3:8-2257_ORF1_GPHN_3:7:2256, XP_006515970.1 lcl|GPHN_1:8-2218_ORF1_GPHN_1:7:2217, XP_017170562.1, XP_017170563.1, XP_017170564.1, XP_017170565.1 lcl|GPHN_29:8-2323_ORF1_GPHN_…
HHQEPLPWAQSTGNQM	HHQEPLPWAQSTGNQM		40.15	1859.84	-0.9	930.925	23.42	NP_666077.2 lcl|GPHN_4:8-2326_ORF1_GPHN_4:7:2325, XP_006515962.1, XP_006515963.1, XP_006515964.1, XP_006515965.1, XP_006515966.1, XP_006515967.1, XP_006515968.1 lcl|GPHN_38:8-2365_ORF1_GPHN_38:7:2364, XP_006515969.1 lcl|GPHN_3:8-2257_ORF1_GPHN_3:7:2256, XP_006515970.1 lcl|GPHN_1:8-2218_ORF1_GPHN_1:7:2217, XP_017170562.1, XP_017170563.1, XP_017170564.1, XP_017170565.1 lcl|GPHN_29:8-2323_ORF1_GPHN_…
HHQEPLPWAQSTGNQMS	HHQEPLPWAQSTGNQM(+15.99)S	M16:Oxidation (M):1000.00	42.68	1962.86	0.3	655.295	21.29	NP_666077.2 lcl|GPHN_4:8-2326_ORF1_GPHN_4:7:2325, XP_006515962.1, XP_006515963.1, XP_006515964.1, XP_006515965.1, XP_006515966.1, XP_006515967.1, XP_006515968.1 lcl|GPHN_38:8-2365_ORF1_GPHN_38:7:2364, XP_006515969.1 lcl|GPHN_3:8-2257_ORF1_GPHN_3:7:2256, XP_006515970.1 lcl|GPHN_1:8-2218_ORF1_GPHN_1:7:2217, XP_017170562.1, XP_017170563.1, XP_017170564.1, XP_017170565.1 lcl|GPHN_29:8-2323_ORF1_GPHN_…
HHQEPLPWAQSTGNQMS	HHQEPLPWAQSTGNQMS		22.22	1946.87	-1.6	649.963	22.83	NP_666077.2 lcl|GPHN_4:8-2326_ORF1_GPHN_4:7:2325, XP_006515962.1, XP_006515963.1, XP_006515964.1, XP_006515965.1, XP_006515966.1, XP_006515967.1, XP_006515968.1 lcl|GPHN_38:8-2365_ORF1_GPHN_38:7:2364, XP_006515969.1 lcl|GPHN_3:8-2257_ORF1_GPHN_3:7:2256, XP_006515970.1 lcl|GPHN_1:8-2218_ORF1_GPHN_1:7:2217, XP_017170562.1, XP_017170563.1, XP_017170564.1, XP_017170565.1 lcl|GPHN_29:8-2323_ORF1_GPHN_…
HHQEPLPWAQSTGNQMSSR	HHQEPLPWAQSTGNQM(+15.99)SSR	M16:Oxidation (M):1000.00	52.84	2206	0.8	552.507	18.47	NP_666077.2 lcl|GPHN_4:8-2326_ORF1_GPHN_4:7:2325, XP_006515962.1, XP_006515963.1, XP_006515964.1, XP_006515965.1, XP_006515966.1, XP_006515967.1, XP_006515968.1 lcl|GPHN_38:8-2365_ORF1_GPHN_38:7:2364, XP_006515969.1 lcl|GPHN_3:8-2257_ORF1_GPHN_3:7:2256, XP_006515970.1 lcl|GPHN_1:8-2218_ORF1_GPHN_1:7:2217, XP_017170562.1, XP_017170563.1, XP_017170564.1, XP_017170565.1 lcl|GPHN_29:8-2323_ORF1_GPHN_…
HHQEPLPWAQSTGNQMSSR	HHQEPLPWAQSTGNQMSSR		43.34	2190	3.2	731.01	20.42	NP_666077.2 lcl|GPHN_4:8-2326_ORF1_GPHN_4:7:2325, XP_006515962.1, XP_006515963.1, XP_006515964.1, XP_006515965.1, XP_006515966.1, XP_006515967.1, XP_006515968.1 lcl|GPHN_38:8-2365_ORF1_GPHN_38:7:2364, XP_006515969.1 lcl|GPHN_3:8-2257_ORF1_GPHN_3:7:2256, XP_006515970.1 lcl|GPHN_1:8-2218_ORF1_GPHN_1:7:2217, XP_017170562.1, XP_017170563.1, XP_017170564.1, XP_017170565.1 lcl|GPHN_29:8-2323_ORF1_GPHN_…
HHQEPLPWAQSTGNQMSSRL	HHQEPLPWAQSTGNQM(+15.99)SSRL	M16:Oxidation (M):1000.00	52.99	2319.08	1.9	774.036	21.29	NP_666077.2 lcl|GPHN_4:8-2326_ORF1_GPHN_4:7:2325, XP_006515962.1, XP_006515963.1, XP_006515964.1, XP_006515965.1, XP_006515966.1, XP_006515967.1, XP_006515968.1 lcl|GPHN_38:8-2365_ORF1_GPHN_38:7:2364, XP_006515969.1 lcl|GPHN_3:8-2257_ORF1_GPHN_3:7:2256, XP_006515970.1 lcl|GPHN_1:8-2218_ORF1_GPHN_1:7:2217, XP_017170562.1, XP_017170563.1, XP_017170564.1, XP_017170565.1 lcl|GPHN_29:8-2323_ORF1_GPHN_…
HHQEPLPWAQSTGNQMSSRLMS	HHQEPLPWAQSTGNQM(+15.99)SSRLM(+15.99)S	M16:Oxidation (M):1000.00;M21:Oxidation (M):1000.00	37.54	2553.15	-0.4	852.057	20.71	NP_666077.2 lcl|GPHN_4:8-2326_ORF1_GPHN_4:7:2325, XP_006515962.1, XP_006515963.1, XP_006515964.1, XP_006515965.1, XP_006515966.1, XP_006515967.1, XP_006515968.1 lcl|GPHN_38:8-2365_ORF1_GPHN_38:7:2364, XP_006515969.1 lcl|GPHN_3:8-2257_ORF1_GPHN_3:7:2256, XP_006515970.1 lcl|GPHN_1:8-2218_ORF1_GPHN_1:7:2217, XP_017170562.1, XP_017170563.1, XP_017170564.1, XP_017170565.1 lcl|GPHN_29:8-2323_ORF1_GPHN_…
HHQEPLPWAQSTGNQMSSRLMSMRS	HHQEPLPWAQSTGNQM(+15.99)SSRLM(+15.99)SM(+15.99)RS	M16:Oxidation (M):1000.00;M21:Oxidation (M):1000.00;M23:Oxidation (M):1000.00	25.95	2943.32	3.9	736.84	19.23	NP_666077.2 lcl|GPHN_4:8-2326_ORF1_GPHN_4:7:2325, XP_006515962.1, XP_006515963.1, XP_006515964.1, XP_006515965.1, XP_006515966.1, XP_006515967.1, XP_006515968.1 lcl|GPHN_38:8-2365_ORF1_GPHN_38:7:2364, XP_006515969.1 lcl|GPHN_3:8-2257_ORF1_GPHN_3:7:2256, XP_006515970.1 lcl|GPHN_1:8-2218_ORF1_GPHN_1:7:2217, XP_017170562.1, XP_017170563.1, XP_017170564.1, XP_017170565.1 lcl|GPHN_29:8-2323_ORF1_GPHN_…
HHQEPLPWAQSTGNQMSSRLMSMRSA	HHQEPLPWAQSTGNQMSS(+79.97)RLMSMRSA	S18:Phosphorylation (STY):0.00	28.61	3046.34	1.5	1016.45	21.66	NP_666077.2 lcl|GPHN_4:8-2326_ORF1_GPHN_4:7:2325, XP_006515962.1, XP_006515963.1, XP_006515964.1, XP_006515965.1, XP_006515966.1, XP_006515967.1, XP_006515968.1 lcl|GPHN_38:8-2365_ORF1_GPHN_38:7:2364, XP_006515969.1 lcl|GPHN_3:8-2257_ORF1_GPHN_3:7:2256, XP_006515970.1 lcl|GPHN_1:8-2218_ORF1_GPHN_1:7:2217, XP_017170562.1, XP_017170563.1, XP_017170564.1, XP_017170565.1 lcl|GPHN_29:8-2323_ORF1_GPHN_…
HKGEVVDV	HKGEVVDV		21.49	881.461	-0.7	441.737	15.45	NP_666077.2 lcl|GPHN_4:8-2326_ORF1_GPHN_4:7:2325, XP_006515962.1, XP_006515963.1, XP_006515964.1, XP_006515965.1, XP_006515966.1, XP_006515967.1, XP_006515968.1 lcl|GPHN_38:8-2365_ORF1_GPHN_38:7:2364, XP_006515969.1 lcl|GPHN_3:8-2257_ORF1_GPHN_3:7:2256, XP_006515970.1 lcl|GPHN_1:8-2218_ORF1_GPHN_1:7:2217, XP_017170562.1, XP_017170563.1, XP_017170564.1, XP_017170565.1 lcl|GPHN_29:8-2323_ORF1_GPHN_…
HKGEVVDVM	HKGEVVDVM		30.05	1012.5	-1.6	507.257	18.46	NP_666077.2 lcl|GPHN_4:8-2326_ORF1_GPHN_4:7:2325, XP_006515962.1, XP_006515963.1, XP_006515964.1, XP_006515965.1, XP_006515966.1, XP_006515967.1, XP_006515968.1 lcl|GPHN_38:8-2365_ORF1_GPHN_38:7:2364, XP_006515969.1 lcl|GPHN_3:8-2257_ORF1_GPHN_3:7:2256, XP_006515970.1 lcl|GPHN_1:8-2218_ORF1_GPHN_1:7:2217, XP_017170562.1, XP_017170563.1, XP_017170564.1, XP_017170565.1 lcl|GPHN_29:8-2323_ORF1_GPHN_…
HKGEVVDVM	HKGEVVDVM(+15.99)	M9:Oxidation (M):1000.00	26.86	1028.5	-1	515.255	15.17	NP_666077.2 lcl|GPHN_4:8-2326_ORF1_GPHN_4:7:2325, XP_006515962.1, XP_006515963.1, XP_006515964.1, XP_006515965.1, XP_006515966.1, XP_006515967.1, XP_006515968.1 lcl|GPHN_38:8-2365_ORF1_GPHN_38:7:2364, XP_006515969.1 lcl|GPHN_3:8-2257_ORF1_GPHN_3:7:2256, XP_006515970.1 lcl|GPHN_1:8-2218_ORF1_GPHN_1:7:2217, XP_017170562.1, XP_017170563.1, XP_017170564.1, XP_017170565.1 lcl|GPHN_29:8-2323_ORF1_GPHN_…
HKGEVVDVMVI	HKGEVVDVM(+15.99)VI	M9:Oxidation (M):1000.00	34.37	1240.65	1.8	621.333	22.59	NP_666077.2 lcl|GPHN_4:8-2326_ORF1_GPHN_4:7:2325, XP_006515962.1, XP_006515963.1, XP_006515964.1, XP_006515965.1, XP_006515966.1, XP_006515967.1, XP_006515968.1 lcl|GPHN_38:8-2365_ORF1_GPHN_38:7:2364, XP_006515969.1 lcl|GPHN_3:8-2257_ORF1_GPHN_3:7:2256, XP_006515970.1 lcl|GPHN_1:8-2218_ORF1_GPHN_1:7:2217, XP_017170562.1, XP_017170563.1, XP_017170564.1, XP_017170565.1 lcl|GPHN_29:8-2323_ORF1_GPHN_…
HMGPSEI	HMGPSEI		26.61	769.343	-0.4	385.679	18.75	NP_666077.2 lcl|GPHN_4:8-2326_ORF1_GPHN_4:7:2325, XP_006515962.1, XP_006515963.1, XP_006515964.1, XP_006515965.1, XP_006515966.1, XP_006515967.1, XP_006515968.1 lcl|GPHN_38:8-2365_ORF1_GPHN_38:7:2364, XP_006515969.1 lcl|GPHN_3:8-2257_ORF1_GPHN_3:7:2256, XP_006515970.1 lcl|GPHN_1:8-2218_ORF1_GPHN_1:7:2217, XP_017170562.1, XP_017170563.1, XP_017170564.1, XP_017170565.1 lcl|GPHN_29:8-2323_ORF1_GPHN_…
HMGPSEI	HM(+15.99)GPSEI	M2:Oxidation (M):1000.00	23.11	785.338	1.2	786.346	15.52	NP_666077.2 lcl|GPHN_4:8-2326_ORF1_GPHN_4:7:2325, XP_006515962.1, XP_006515963.1, XP_006515964.1, XP_006515965.1, XP_006515966.1, XP_006515967.1, XP_006515968.1 lcl|GPHN_38:8-2365_ORF1_GPHN_38:7:2364, XP_006515969.1 lcl|GPHN_3:8-2257_ORF1_GPHN_3:7:2256, XP_006515970.1 lcl|GPHN_1:8-2218_ORF1_GPHN_1:7:2217, XP_017170562.1, XP_017170563.1, XP_017170564.1, XP_017170565.1 lcl|GPHN_29:8-2323_ORF1_GPHN_…
HMGPSEIG	HMGPSEIG		31.82	826.364	-1.1	414.189	18.17	NP_666077.2 lcl|GPHN_4:8-2326_ORF1_GPHN_4:7:2325, XP_006515962.1, XP_006515963.1, XP_006515964.1, XP_006515965.1, XP_006515966.1, XP_006515967.1, XP_006515968.1 lcl|GPHN_38:8-2365_ORF1_GPHN_38:7:2364, XP_006515969.1 lcl|GPHN_3:8-2257_ORF1_GPHN_3:7:2256, XP_006515970.1 lcl|GPHN_1:8-2218_ORF1_GPHN_1:7:2217, XP_017170562.1, XP_017170563.1, XP_017170564.1, XP_017170565.1 lcl|GPHN_29:8-2323_ORF1_GPHN_…
HMGPSEIGL	HM(+15.99)GPSEIGL	M2:Oxidation (M):1000.00	25.55	955.443	1.8	478.73	21.66	NP_666077.2 lcl|GPHN_4:8-2326_ORF1_GPHN_4:7:2325, XP_006515962.1, XP_006515963.1, XP_006515964.1, XP_006515965.1, XP_006515966.1, XP_006515967.1, XP_006515968.1 lcl|GPHN_38:8-2365_ORF1_GPHN_38:7:2364, XP_006515969.1 lcl|GPHN_3:8-2257_ORF1_GPHN_3:7:2256, XP_006515970.1 lcl|GPHN_1:8-2218_ORF1_GPHN_1:7:2217, XP_017170562.1, XP_017170563.1, XP_017170564.1, XP_017170565.1 lcl|GPHN_29:8-2323_ORF1_GPHN_…
HMGPSEIGLL	HMGPSEIGLL		30.14	1052.53	-0.7	527.273	27.6	NP_666077.2 lcl|GPHN_4:8-2326_ORF1_GPHN_4:7:2325, XP_006515962.1, XP_006515963.1, XP_006515964.1, XP_006515965.1, XP_006515966.1, XP_006515967.1, XP_006515968.1 lcl|GPHN_38:8-2365_ORF1_GPHN_38:7:2364, XP_006515969.1 lcl|GPHN_3:8-2257_ORF1_GPHN_3:7:2256, XP_006515970.1 lcl|GPHN_1:8-2218_ORF1_GPHN_1:7:2217, XP_017170562.1, XP_017170563.1, XP_017170564.1, XP_017170565.1 lcl|GPHN_29:8-2323_ORF1_GPHN_…
HMGPSEIGLL	HM(+15.99)GPSEIGLL	M2:Oxidation (M):1000.00	27.76	1068.53	0.2	535.271	25.53	NP_666077.2 lcl|GPHN_4:8-2326_ORF1_GPHN_4:7:2325, XP_006515962.1, XP_006515963.1, XP_006515964.1, XP_006515965.1, XP_006515966.1, XP_006515967.1, XP_006515968.1 lcl|GPHN_38:8-2365_ORF1_GPHN_38:7:2364, XP_006515969.1 lcl|GPHN_3:8-2257_ORF1_GPHN_3:7:2256, XP_006515970.1 lcl|GPHN_1:8-2218_ORF1_GPHN_1:7:2217, XP_017170562.1, XP_017170563.1, XP_017170564.1, XP_017170565.1 lcl|GPHN_29:8-2323_ORF1_GPHN_…
HMGPSEIGLLA	HMGPSEIGLLA		27.74	1123.57	0.3	562.792	27.39	NP_666077.2 lcl|GPHN_4:8-2326_ORF1_GPHN_4:7:2325, XP_006515962.1, XP_006515963.1, XP_006515964.1, XP_006515965.1, XP_006515966.1, XP_006515967.1, XP_006515968.1 lcl|GPHN_38:8-2365_ORF1_GPHN_38:7:2364, XP_006515969.1 lcl|GPHN_3:8-2257_ORF1_GPHN_3:7:2256, XP_006515970.1 lcl|GPHN_1:8-2218_ORF1_GPHN_1:7:2217, XP_017170562.1, XP_017170563.1, XP_017170564.1, XP_017170565.1 lcl|GPHN_29:8-2323_ORF1_GPHN_…
HMGPSEIGLLA	HM(+15.99)GPSEIGLLA	M2:Oxidation (M):1000.00	23.86	1139.56	-0.2	570.789	25.28	NP_666077.2 lcl|GPHN_4:8-2326_ORF1_GPHN_4:7:2325, XP_006515962.1, XP_006515963.1, XP_006515964.1, XP_006515965.1, XP_006515966.1, XP_006515967.1, XP_006515968.1 lcl|GPHN_38:8-2365_ORF1_GPHN_38:7:2364, XP_006515969.1 lcl|GPHN_3:8-2257_ORF1_GPHN_3:7:2256, XP_006515970.1 lcl|GPHN_1:8-2218_ORF1_GPHN_1:7:2217, XP_017170562.1, XP_017170563.1, XP_017170564.1, XP_017170565.1 lcl|GPHN_29:8-2323_ORF1_GPHN_…
HPFYTSPALFMANHGQPIPGLISYSHHATGSADK	HPFYTSPALFM(+15.99)ANHGQPIPGLISYSHHATGSADK	M11:Oxidation (M):1000.00	36.04	3664.75	0	733.958	25.63	NP_666077.2 lcl|GPHN_4:8-2326_ORF1_GPHN_4:7:2325, XP_006515962.1, XP_006515963.1, XP_006515964.1, XP_006515965.1, XP_006515968.1 lcl|GPHN_38:8-2365_ORF1_GPHN_38:7:2364, XP_017170562.1, XP_017170563.1, XP_017170564.1, lcl|GPHN_101:8-994_ORF2_GPHN_101:7:993, lcl|GPHN_105:73-2247_ORF1_GPHN_105:72:2246, lcl|GPHN_119:441-2183_ORF3_GPHN_119:440:2182, lcl|GPHN_121:8-2368_ORF1_GPHN_121:7:2367, lcl|GPHN_1…
HQEPLPW	HQEPLPW		26.7	905.439	-0.2	453.727	25.18	NP_666077.2 lcl|GPHN_4:8-2326_ORF1_GPHN_4:7:2325, XP_006515962.1, XP_006515963.1, XP_006515964.1, XP_006515965.1, XP_006515966.1, XP_006515967.1, XP_006515968.1 lcl|GPHN_38:8-2365_ORF1_GPHN_38:7:2364, XP_006515969.1 lcl|GPHN_3:8-2257_ORF1_GPHN_3:7:2256, XP_006515970.1 lcl|GPHN_1:8-2218_ORF1_GPHN_1:7:2217, XP_017170562.1, XP_017170563.1, XP_017170564.1, XP_017170565.1 lcl|GPHN_29:8-2323_ORF1_GPHN_…
HQEPLPWA	HQEPLPWA		26.69	976.477	0.5	489.246	25.51	NP_666077.2 lcl|GPHN_4:8-2326_ORF1_GPHN_4:7:2325, XP_006515962.1, XP_006515963.1, XP_006515964.1, XP_006515965.1, XP_006515966.1, XP_006515967.1, XP_006515968.1 lcl|GPHN_38:8-2365_ORF1_GPHN_38:7:2364, XP_006515969.1 lcl|GPHN_3:8-2257_ORF1_GPHN_3:7:2256, XP_006515970.1 lcl|GPHN_1:8-2218_ORF1_GPHN_1:7:2217, XP_017170562.1, XP_017170563.1, XP_017170564.1, XP_017170565.1 lcl|GPHN_29:8-2323_ORF1_GPHN_…
HQEPLPWAQ	HQEPLPWAQ		34.52	1104.54	2.5	553.276	25.02	NP_666077.2 lcl|GPHN_4:8-2326_ORF1_GPHN_4:7:2325, XP_006515962.1, XP_006515963.1, XP_006515964.1, XP_006515965.1, XP_006515966.1, XP_006515967.1, XP_006515968.1 lcl|GPHN_38:8-2365_ORF1_GPHN_38:7:2364, XP_006515969.1 lcl|GPHN_3:8-2257_ORF1_GPHN_3:7:2256, XP_006515970.1 lcl|GPHN_1:8-2218_ORF1_GPHN_1:7:2217, XP_017170562.1, XP_017170563.1, XP_017170564.1, XP_017170565.1 lcl|GPHN_29:8-2323_ORF1_GPHN_…
HQEPLPWAQS	HQEPLPWAQS		31.85	1191.57	-2.7	596.789	24.84	NP_666077.2 lcl|GPHN_4:8-2326_ORF1_GPHN_4:7:2325, XP_006515962.1, XP_006515963.1, XP_006515964.1, XP_006515965.1, XP_006515966.1, XP_006515967.1, XP_006515968.1 lcl|GPHN_38:8-2365_ORF1_GPHN_38:7:2364, XP_006515969.1 lcl|GPHN_3:8-2257_ORF1_GPHN_3:7:2256, XP_006515970.1 lcl|GPHN_1:8-2218_ORF1_GPHN_1:7:2217, XP_017170562.1, XP_017170563.1, XP_017170564.1, XP_017170565.1 lcl|GPHN_29:8-2323_ORF1_GPHN_…
HQEPLPWAQSTGNQ	HQEPLPWAQSTGNQ		36.79	1591.74	1.8	796.878	24.37	NP_666077.2 lcl|GPHN_4:8-2326_ORF1_GPHN_4:7:2325, XP_006515962.1, XP_006515963.1, XP_006515964.1, XP_006515965.1, XP_006515966.1, XP_006515967.1, XP_006515968.1 lcl|GPHN_38:8-2365_ORF1_GPHN_38:7:2364, XP_006515969.1 lcl|GPHN_3:8-2257_ORF1_GPHN_3:7:2256, XP_006515970.1 lcl|GPHN_1:8-2218_ORF1_GPHN_1:7:2217, XP_017170562.1, XP_017170563.1, XP_017170564.1, XP_017170565.1 lcl|GPHN_29:8-2323_ORF1_GPHN_…
HQEPLPWAQSTGNQMSSR	HQEPLPWAQSTGNQM(+15.99)SSR	M15:Oxidation (M):1000.00	52.84	2068.94	2	690.655	20.89	NP_666077.2 lcl|GPHN_4:8-2326_ORF1_GPHN_4:7:2325, XP_006515962.1, XP_006515963.1, XP_006515964.1, XP_006515965.1, XP_006515966.1, XP_006515967.1, XP_006515968.1 lcl|GPHN_38:8-2365_ORF1_GPHN_38:7:2364, XP_006515969.1 lcl|GPHN_3:8-2257_ORF1_GPHN_3:7:2256, XP_006515970.1 lcl|GPHN_1:8-2218_ORF1_GPHN_1:7:2217, XP_017170562.1, XP_017170563.1, XP_017170564.1, XP_017170565.1 lcl|GPHN_29:8-2323_ORF1_GPHN_…
HRMSPFP	HRM(+15.99)SPFP	M3:Oxidation (M):1000.00	18.21	886.412	-1.2	444.213	16.64	NP_666077.2 lcl|GPHN_4:8-2326_ORF1_GPHN_4:7:2325, XP_006515962.1, XP_006515963.1, XP_006515964.1, XP_006515965.1, XP_006515966.1, XP_006515967.1, XP_006515968.1 lcl|GPHN_38:8-2365_ORF1_GPHN_38:7:2364, XP_006515969.1 lcl|GPHN_3:8-2257_ORF1_GPHN_3:7:2256, XP_006515970.1 lcl|GPHN_1:8-2218_ORF1_GPHN_1:7:2217, XP_017170562.1, XP_017170563.1, XP_017170564.1, XP_017170565.1 lcl|GPHN_29:8-2323_ORF1_GPHN_…
HRMSPFPL	HRM(+15.99)SPFPL	M3:Oxidation (M):1000.00	26.03	999.496	3.8	500.757	21.3	NP_666077.2 lcl|GPHN_4:8-2326_ORF1_GPHN_4:7:2325, XP_006515962.1, XP_006515963.1, XP_006515964.1, XP_006515965.1, XP_006515966.1, XP_006515967.1, XP_006515968.1 lcl|GPHN_38:8-2365_ORF1_GPHN_38:7:2364, XP_006515969.1 lcl|GPHN_3:8-2257_ORF1_GPHN_3:7:2256, XP_006515970.1 lcl|GPHN_1:8-2218_ORF1_GPHN_1:7:2217, XP_017170562.1, XP_017170563.1, XP_017170564.1, XP_017170565.1 lcl|GPHN_29:8-2323_ORF1_GPHN_…
HRMSPFPL	HRMSPFPL		24.21	983.501	0.5	492.758	23.24	NP_666077.2 lcl|GPHN_4:8-2326_ORF1_GPHN_4:7:2325, XP_006515962.1, XP_006515963.1, XP_006515964.1, XP_006515965.1, XP_006515966.1, XP_006515967.1, XP_006515968.1 lcl|GPHN_38:8-2365_ORF1_GPHN_38:7:2364, XP_006515969.1 lcl|GPHN_3:8-2257_ORF1_GPHN_3:7:2256, XP_006515970.1 lcl|GPHN_1:8-2218_ORF1_GPHN_1:7:2217, XP_017170562.1, XP_017170563.1, XP_017170564.1, XP_017170565.1 lcl|GPHN_29:8-2323_ORF1_GPHN_…
HRMSPFPLT	HRM(+15.99)SPFPLT	M3:Oxidation (M):1000.00	24.57	1100.54	0.5	551.279	20.77	NP_666077.2 lcl|GPHN_4:8-2326_ORF1_GPHN_4:7:2325, XP_006515962.1, XP_006515963.1, XP_006515964.1, XP_006515965.1, XP_006515966.1, XP_006515967.1, XP_006515968.1 lcl|GPHN_38:8-2365_ORF1_GPHN_38:7:2364, XP_006515969.1 lcl|GPHN_3:8-2257_ORF1_GPHN_3:7:2256, XP_006515970.1 lcl|GPHN_1:8-2218_ORF1_GPHN_1:7:2217, XP_017170562.1, XP_017170563.1, XP_017170564.1, XP_017170565.1 lcl|GPHN_29:8-2323_ORF1_GPHN_…
HRMSPFPLTS	HRM(+15.99)SPFPLTS	M3:Oxidation (M):1000.00	27.78	1187.58	-3.8	396.864	20.7	NP_666077.2 lcl|GPHN_4:8-2326_ORF1_GPHN_4:7:2325, XP_006515962.1, XP_006515963.1, XP_006515964.1, XP_006515965.1, XP_006515966.1, XP_006515967.1, XP_006515968.1 lcl|GPHN_38:8-2365_ORF1_GPHN_38:7:2364, XP_006515969.1 lcl|GPHN_3:8-2257_ORF1_GPHN_3:7:2256, XP_006515970.1 lcl|GPHN_1:8-2218_ORF1_GPHN_1:7:2217, XP_017170562.1, XP_017170563.1, XP_017170564.1, XP_017170565.1 lcl|GPHN_29:8-2323_ORF1_GPHN_…
HRMSPFPLTSMDK	HRMS(+79.97)PFPLTSM(+15.99)DK	S4:Phosphorylation (STY):22.36;M11:Oxidation (M):29.70	27.09	1641.7	-0.7	548.242	21.05	NP_666077.2 lcl|GPHN_4:8-2326_ORF1_GPHN_4:7:2325, XP_006515962.1, XP_006515963.1, XP_006515964.1, XP_006515965.1, XP_006515966.1, XP_006515967.1, XP_006515968.1 lcl|GPHN_38:8-2365_ORF1_GPHN_38:7:2364, XP_006515969.1 lcl|GPHN_3:8-2257_ORF1_GPHN_3:7:2256, XP_006515970.1 lcl|GPHN_1:8-2218_ORF1_GPHN_1:7:2217, XP_017170562.1, XP_017170563.1, XP_017170564.1, XP_017170565.1 lcl|GPHN_29:8-2323_ORF1_GPHN_…
HRMSPFPLTSMDK	HRM(+15.99)S(+79.97)PFPLTSM(+15.99)DK	M3:Oxidation (M):1000.00;S4:Phosphorylation (STY):51.00;M11:Oxidation (M):1000.00	21.93	1657.7	-0.6	553.573	18.82	NP_666077.2 lcl|GPHN_4:8-2326_ORF1_GPHN_4:7:2325, XP_006515962.1, XP_006515963.1, XP_006515964.1, XP_006515965.1, XP_006515966.1, XP_006515967.1, XP_006515968.1 lcl|GPHN_38:8-2365_ORF1_GPHN_38:7:2364, XP_006515969.1 lcl|GPHN_3:8-2257_ORF1_GPHN_3:7:2256, XP_006515970.1 lcl|GPHN_1:8-2218_ORF1_GPHN_1:7:2217, XP_017170562.1, XP_017170563.1, XP_017170564.1, XP_017170565.1 lcl|GPHN_29:8-2323_ORF1_GPHN_…
HRMSPFPLTSMDKA	HRM(+15.99)SPFPLTSMDKA	M3:Oxidation (M):126.07	40.81	1632.78	0.5	545.266	21.08	NP_666077.2 lcl|GPHN_4:8-2326_ORF1_GPHN_4:7:2325, XP_006515962.1, XP_006515963.1, XP_006515964.1, XP_006515965.1, XP_006515966.1, XP_006515967.1, XP_006515968.1 lcl|GPHN_38:8-2365_ORF1_GPHN_38:7:2364, XP_006515969.1 lcl|GPHN_3:8-2257_ORF1_GPHN_3:7:2256, XP_006515970.1 lcl|GPHN_1:8-2218_ORF1_GPHN_1:7:2217, XP_017170562.1, XP_017170563.1, XP_017170564.1, XP_017170565.1 lcl|GPHN_29:8-2323_ORF1_GPHN_…
HRMSPFPLTSMDKA	HRM(+15.99)SPFPLTSM(+15.99)DKA	M3:Oxidation (M):1000.00;M11:Oxidation (M):1000.00	38.27	1648.77	1.5	550.598	18.44	NP_666077.2 lcl|GPHN_4:8-2326_ORF1_GPHN_4:7:2325, XP_006515962.1, XP_006515963.1, XP_006515964.1, XP_006515965.1, XP_006515966.1, XP_006515967.1, XP_006515968.1 lcl|GPHN_38:8-2365_ORF1_GPHN_38:7:2364, XP_006515969.1 lcl|GPHN_3:8-2257_ORF1_GPHN_3:7:2256, XP_006515970.1 lcl|GPHN_1:8-2218_ORF1_GPHN_1:7:2217, XP_017170562.1, XP_017170563.1, XP_017170564.1, XP_017170565.1 lcl|GPHN_29:8-2323_ORF1_GPHN_…
HRMSPFPLTSMDKA	HRMSPFPLTSM(+15.99)DKA	M11:Oxidation (M):101.72	36.78	1632.78	0.8	545.266	19.94	NP_666077.2 lcl|GPHN_4:8-2326_ORF1_GPHN_4:7:2325, XP_006515962.1, XP_006515963.1, XP_006515964.1, XP_006515965.1, XP_006515966.1, XP_006515967.1, XP_006515968.1 lcl|GPHN_38:8-2365_ORF1_GPHN_38:7:2364, XP_006515969.1 lcl|GPHN_3:8-2257_ORF1_GPHN_3:7:2256, XP_006515970.1 lcl|GPHN_1:8-2218_ORF1_GPHN_1:7:2217, XP_017170562.1, XP_017170563.1, XP_017170564.1, XP_017170565.1 lcl|GPHN_29:8-2323_ORF1_GPHN_…
HSAVDITKVA	HSAVDITKVA		35.83	1039.57	0.4	520.791	19.06	NP_666077.2 lcl|GPHN_4:8-2326_ORF1_GPHN_4:7:2325, XP_006515962.1, XP_006515963.1, XP_006515964.1, XP_006515965.1, XP_006515966.1, XP_006515967.1, XP_006515968.1 lcl|GPHN_38:8-2365_ORF1_GPHN_38:7:2364, XP_006515969.1 lcl|GPHN_3:8-2257_ORF1_GPHN_3:7:2256, XP_006515970.1 lcl|GPHN_1:8-2218_ORF1_GPHN_1:7:2217, XP_017170562.1, XP_017170563.1, XP_017170564.1, XP_017170565.1 lcl|GPHN_29:8-2323_ORF1_GPHN_…
HSRLEGLKDELWR	HSRLEGLKDELWR		40.01	1637.86	-0.7	410.473	23.5	XP_006515962.1, XP_006515963.1, XP_006515964.1, XP_006515966.1, XP_006515967.1, XP_017170562.1, XP_017170563.1, XP_017170565.1 lcl|GPHN_29:8-2323_ORF1_GPHN_29:7:2322, XP_017170568.1, XP_030102590.1 lcl|GPHN_41:8-2320_ORF1_GPHN_41:7:2319, XP_030102591.1 lcl|GPHN_8:8-2281_ORF1_GPHN_8:7:2280, XP_030102592.1, lcl|GPHN_103:8-2287_ORF1_GPHN_103:7:2286, lcl|GPHN_106:8-1873_ORF1_GPHN_106:7:1872, lcl|GPHN…
IDLHAQIHFGRVFMKPGLPTTFATLDIDGVR	IDLHAQIHFGRVFM(+15.99)KPGLPTTFATLDIDGVR	M14:Oxidation (M):1000.00	21.64	3480.83	6.5	871.221	29.75	NP_666077.2 lcl|GPHN_4:8-2326_ORF1_GPHN_4:7:2325, XP_006515962.1, XP_006515963.1, XP_006515964.1, XP_006515965.1, XP_006515966.1, XP_006515967.1, XP_006515968.1 lcl|GPHN_38:8-2365_ORF1_GPHN_38:7:2364, XP_006515969.1 lcl|GPHN_3:8-2257_ORF1_GPHN_3:7:2256, XP_006515970.1 lcl|GPHN_1:8-2218_ORF1_GPHN_1:7:2217, XP_017170562.1, XP_017170563.1, XP_017170564.1, XP_017170565.1 lcl|GPHN_29:8-2323_ORF1_GPHN_…
IDLLRDA	I(+42.01)DLLRDA	I1:Acetylation (Protein N-term):1000.00	19.99	856.465	-1.2	429.24	33.07	NP_666077.2 lcl|GPHN_4:8-2326_ORF1_GPHN_4:7:2325, XP_006515962.1, XP_006515963.1, XP_006515964.1, XP_006515965.1, XP_006515966.1, XP_006515967.1, XP_006515968.1 lcl|GPHN_38:8-2365_ORF1_GPHN_38:7:2364, XP_006515969.1 lcl|GPHN_3:8-2257_ORF1_GPHN_3:7:2256, XP_006515970.1 lcl|GPHN_1:8-2218_ORF1_GPHN_1:7:2217, XP_017170562.1, XP_017170563.1, XP_017170564.1, XP_017170565.1 lcl|GPHN_29:8-2323_ORF1_GPHN_…
IDLLRDAIVK	IDLLRDAIVK		30.47	1154.7	1.7	578.359	25.68	NP_666077.2 lcl|GPHN_4:8-2326_ORF1_GPHN_4:7:2325, XP_006515962.1, XP_006515963.1, XP_006515964.1, XP_006515965.1, XP_006515966.1, XP_006515967.1, XP_006515968.1 lcl|GPHN_38:8-2365_ORF1_GPHN_38:7:2364, XP_006515969.1 lcl|GPHN_3:8-2257_ORF1_GPHN_3:7:2256, XP_006515970.1 lcl|GPHN_1:8-2218_ORF1_GPHN_1:7:2217, XP_017170562.1, XP_017170563.1, XP_017170564.1, XP_017170565.1 lcl|GPHN_29:8-2323_ORF1_GPHN_…
IDLLRDAIVK	I(+42.01)DLLRDAIVK	I1:Acetylation (Protein N-term):1000.00	27.09	1196.71	-1.6	599.363	31.01	NP_666077.2 lcl|GPHN_4:8-2326_ORF1_GPHN_4:7:2325, XP_006515962.1, XP_006515963.1, XP_006515964.1, XP_006515965.1, XP_006515966.1, XP_006515967.1, XP_006515968.1 lcl|GPHN_38:8-2365_ORF1_GPHN_38:7:2364, XP_006515969.1 lcl|GPHN_3:8-2257_ORF1_GPHN_3:7:2256, XP_006515970.1 lcl|GPHN_1:8-2218_ORF1_GPHN_1:7:2217, XP_017170562.1, XP_017170563.1, XP_017170564.1, XP_017170565.1 lcl|GPHN_29:8-2323_ORF1_GPHN_…
IDLLRDAIVKVKE	IDLLRDAIVKVKE		33.95	1510.91	4.7	504.646	25.68	NP_666077.2 lcl|GPHN_4:8-2326_ORF1_GPHN_4:7:2325, XP_006515962.1, XP_006515963.1, XP_006515964.1, XP_006515965.1, XP_006515966.1, XP_006515967.1, XP_006515968.1 lcl|GPHN_38:8-2365_ORF1_GPHN_38:7:2364, XP_006515969.1 lcl|GPHN_3:8-2257_ORF1_GPHN_3:7:2256, XP_006515970.1 lcl|GPHN_1:8-2218_ORF1_GPHN_1:7:2217, XP_017170562.1, XP_017170563.1, XP_017170564.1, XP_017170565.1 lcl|GPHN_29:8-2323_ORF1_GPHN_…
IDWCDEKE	IDWC(+57.02)DEKE	C4:Carbamidomethylation:1000.00	29.52	1093.44	1.1	547.727	21.7	NP_666077.2 lcl|GPHN_4:8-2326_ORF1_GPHN_4:7:2325, XP_006515962.1, XP_006515963.1, XP_006515964.1, XP_006515965.1, XP_006515966.1, XP_006515967.1, XP_006515968.1 lcl|GPHN_38:8-2365_ORF1_GPHN_38:7:2364, XP_006515969.1 lcl|GPHN_3:8-2257_ORF1_GPHN_3:7:2256, XP_006515970.1 lcl|GPHN_1:8-2218_ORF1_GPHN_1:7:2217, XP_017170562.1, XP_017170563.1, XP_017170564.1, XP_017170565.1 lcl|GPHN_29:8-2323_ORF1_GPHN_…
IDWCDEKELN	IDWC(+57.02)DEKELN	C4:Carbamidomethylation:1000.00	36.03	1320.57	0.7	661.29	25.43	NP_666077.2 lcl|GPHN_4:8-2326_ORF1_GPHN_4:7:2325, XP_006515962.1, XP_006515963.1, XP_006515964.1, XP_006515965.1, XP_006515966.1, XP_006515967.1, XP_006515968.1 lcl|GPHN_38:8-2365_ORF1_GPHN_38:7:2364, XP_006515969.1 lcl|GPHN_3:8-2257_ORF1_GPHN_3:7:2256, XP_006515970.1 lcl|GPHN_1:8-2218_ORF1_GPHN_1:7:2217, XP_017170562.1, XP_017170563.1, XP_017170564.1, XP_017170565.1 lcl|GPHN_29:8-2323_ORF1_GPHN_…
IDWCDEKELN	IDWCDEKELN		32.5	1263.54	-0.5	632.779	25.91	NP_666077.2 lcl|GPHN_4:8-2326_ORF1_GPHN_4:7:2325, XP_006515962.1, XP_006515963.1, XP_006515964.1, XP_006515965.1, XP_006515966.1, XP_006515967.1, XP_006515968.1 lcl|GPHN_38:8-2365_ORF1_GPHN_38:7:2364, XP_006515969.1 lcl|GPHN_3:8-2257_ORF1_GPHN_3:7:2256, XP_006515970.1 lcl|GPHN_1:8-2218_ORF1_GPHN_1:7:2217, XP_017170562.1, XP_017170563.1, XP_017170564.1, XP_017170565.1 lcl|GPHN_29:8-2323_ORF1_GPHN_…
IDWCDEKELNL	IDWC(+57.02)DEKELNL	C4:Carbamidomethylation:1000.00	35.65	1433.65	0.4	717.832	29.35	NP_666077.2 lcl|GPHN_4:8-2326_ORF1_GPHN_4:7:2325, XP_006515962.1, XP_006515963.1, XP_006515964.1, XP_006515965.1, XP_006515966.1, XP_006515967.1, XP_006515968.1 lcl|GPHN_38:8-2365_ORF1_GPHN_38:7:2364, XP_006515969.1 lcl|GPHN_3:8-2257_ORF1_GPHN_3:7:2256, XP_006515970.1 lcl|GPHN_1:8-2218_ORF1_GPHN_1:7:2217, XP_017170562.1, XP_017170563.1, XP_017170564.1, XP_017170565.1 lcl|GPHN_29:8-2323_ORF1_GPHN_…
IEREAPGMA	IEREAPGMA		35.24	972.47	0.6	487.243	17.06	NP_666077.2 lcl|GPHN_4:8-2326_ORF1_GPHN_4:7:2325, XP_006515962.1, XP_006515963.1, XP_006515964.1, XP_006515965.1, XP_006515966.1, XP_006515967.1, XP_006515968.1 lcl|GPHN_38:8-2365_ORF1_GPHN_38:7:2364, XP_006515969.1 lcl|GPHN_3:8-2257_ORF1_GPHN_3:7:2256, XP_006515970.1 lcl|GPHN_1:8-2218_ORF1_GPHN_1:7:2217, XP_017170562.1, XP_017170563.1, XP_017170564.1, XP_017170565.1 lcl|GPHN_29:8-2323_ORF1_GPHN_…
IEREAPGMA	IEREAPGM(+15.99)A	M8:Oxidation (M):1000.00	30.07	988.465	0.2	495.24	14.66	NP_666077.2 lcl|GPHN_4:8-2326_ORF1_GPHN_4:7:2325, XP_006515962.1, XP_006515963.1, XP_006515964.1, XP_006515965.1, XP_006515966.1, XP_006515967.1, XP_006515968.1 lcl|GPHN_38:8-2365_ORF1_GPHN_38:7:2364, XP_006515969.1 lcl|GPHN_3:8-2257_ORF1_GPHN_3:7:2256, XP_006515970.1 lcl|GPHN_1:8-2218_ORF1_GPHN_1:7:2217, XP_017170562.1, XP_017170563.1, XP_017170564.1, XP_017170565.1 lcl|GPHN_29:8-2323_ORF1_GPHN_…
IEREAPGMALA	IEREAPGM(+15.99)ALA	M8:Oxidation (M):1000.00	23.51	1172.59	0.9	587.301	18.83	NP_666077.2 lcl|GPHN_4:8-2326_ORF1_GPHN_4:7:2325, XP_006515962.1, XP_006515963.1, XP_006515964.1, XP_006515965.1, XP_006515966.1, XP_006515967.1, XP_006515968.1 lcl|GPHN_38:8-2365_ORF1_GPHN_38:7:2364, XP_006515969.1 lcl|GPHN_3:8-2257_ORF1_GPHN_3:7:2256, XP_006515970.1 lcl|GPHN_1:8-2218_ORF1_GPHN_1:7:2217, XP_017170562.1, XP_017170563.1, XP_017170564.1, XP_017170565.1 lcl|GPHN_29:8-2323_ORF1_GPHN_…
IFALPGN	IFALPGN		21.57	730.401	-1.8	366.207	30.22	NP_666077.2 lcl|GPHN_4:8-2326_ORF1_GPHN_4:7:2325, XP_006515962.1, XP_006515963.1, XP_006515964.1, XP_006515965.1, XP_006515966.1, XP_006515967.1, XP_006515968.1 lcl|GPHN_38:8-2365_ORF1_GPHN_38:7:2364, XP_006515969.1 lcl|GPHN_3:8-2257_ORF1_GPHN_3:7:2256, XP_006515970.1 lcl|GPHN_1:8-2218_ORF1_GPHN_1:7:2217, XP_017170562.1, XP_017170563.1, XP_017170564.1, XP_017170565.1 lcl|GPHN_29:8-2323_ORF1_GPHN_…
IFALPGNPV	IFALPGNPV		26.78	926.523	2.8	464.27	32.7	NP_666077.2 lcl|GPHN_4:8-2326_ORF1_GPHN_4:7:2325, XP_006515962.1, XP_006515963.1, XP_006515964.1, XP_006515965.1, XP_006515966.1, XP_006515967.1, XP_006515968.1 lcl|GPHN_38:8-2365_ORF1_GPHN_38:7:2364, XP_006515969.1 lcl|GPHN_3:8-2257_ORF1_GPHN_3:7:2256, XP_006515970.1 lcl|GPHN_1:8-2218_ORF1_GPHN_1:7:2217, XP_017170562.1, XP_017170563.1, XP_017170564.1, XP_017170565.1 lcl|GPHN_29:8-2323_ORF1_GPHN_…
IFALPGNPV	I(+42.01)FALPGNPV	I1:Acetylation (Protein N-term):1000.00	25.78	968.533	-0.5	485.274	40.15	NP_666077.2 lcl|GPHN_4:8-2326_ORF1_GPHN_4:7:2325, XP_006515962.1, XP_006515963.1, XP_006515964.1, XP_006515965.1, XP_006515966.1, XP_006515967.1, XP_006515968.1 lcl|GPHN_38:8-2365_ORF1_GPHN_38:7:2364, XP_006515969.1 lcl|GPHN_3:8-2257_ORF1_GPHN_3:7:2256, XP_006515970.1 lcl|GPHN_1:8-2218_ORF1_GPHN_1:7:2217, XP_017170562.1, XP_017170563.1, XP_017170564.1, XP_017170565.1 lcl|GPHN_29:8-2323_ORF1_GPHN_…
IFALPGNPVS	IFALPGNPVS		27.35	1013.55	-0.4	507.784	31.91	NP_666077.2 lcl|GPHN_4:8-2326_ORF1_GPHN_4:7:2325, XP_006515962.1, XP_006515963.1, XP_006515964.1, XP_006515965.1, XP_006515966.1, XP_006515967.1, XP_006515968.1 lcl|GPHN_38:8-2365_ORF1_GPHN_38:7:2364, XP_006515969.1 lcl|GPHN_3:8-2257_ORF1_GPHN_3:7:2256, XP_006515970.1 lcl|GPHN_1:8-2218_ORF1_GPHN_1:7:2217, XP_017170562.1, XP_017170563.1, XP_017170564.1, XP_017170565.1 lcl|GPHN_29:8-2323_ORF1_GPHN_…
IFALPGNPVSA	IFALPGNPVSA		26.25	1084.59	-4.1	543.301	32.35	NP_666077.2 lcl|GPHN_4:8-2326_ORF1_GPHN_4:7:2325, XP_006515962.1, XP_006515963.1, XP_006515964.1, XP_006515965.1, XP_006515966.1, XP_006515967.1, XP_006515968.1 lcl|GPHN_38:8-2365_ORF1_GPHN_38:7:2364, XP_006515969.1 lcl|GPHN_3:8-2257_ORF1_GPHN_3:7:2256, XP_006515970.1 lcl|GPHN_1:8-2218_ORF1_GPHN_1:7:2217, XP_017170562.1, XP_017170563.1, XP_017170564.1, XP_017170565.1 lcl|GPHN_29:8-2323_ORF1_GPHN_…
IFALPGNPVSAVVTCNLFVVPALR	IFALPGNPVSAVVTC(+57.02)NLFVVPALR	C15:Carbamidomethylation:1000.00	46.94	2553.41	-1.3	852.144	38.93	NP_666077.2 lcl|GPHN_4:8-2326_ORF1_GPHN_4:7:2325, XP_006515962.1, XP_006515963.1, XP_006515964.1, XP_006515965.1, XP_006515966.1, XP_006515967.1, XP_006515968.1 lcl|GPHN_38:8-2365_ORF1_GPHN_38:7:2364, XP_006515969.1 lcl|GPHN_3:8-2257_ORF1_GPHN_3:7:2256, XP_006515970.1 lcl|GPHN_1:8-2218_ORF1_GPHN_1:7:2217, XP_017170562.1, XP_017170563.1, XP_017170564.1, XP_017170565.1 lcl|GPHN_29:8-2323_ORF1_GPHN_…
IGESQAGEQPTQ	IGESQAGEQPTQ		33.08	1243.57	-0.8	622.791	17.51	NP_666077.2 lcl|GPHN_4:8-2326_ORF1_GPHN_4:7:2325, XP_006515962.1, XP_006515963.1, XP_006515964.1, XP_006515965.1, XP_006515966.1, XP_006515967.1, XP_006515968.1 lcl|GPHN_38:8-2365_ORF1_GPHN_38:7:2364, XP_006515969.1 lcl|GPHN_3:8-2257_ORF1_GPHN_3:7:2256, XP_006515970.1 lcl|GPHN_1:8-2218_ORF1_GPHN_1:7:2217, XP_017170562.1, XP_017170563.1, XP_017170564.1, XP_017170565.1 lcl|GPHN_29:8-2323_ORF1_GPHN_…
IGHDIKRGEC	IGHDIKRGEC(+57.02)	C10:Carbamidomethylation:1000.00	31.06	1183.58	0.6	592.796	12.65	NP_666077.2 lcl|GPHN_4:8-2326_ORF1_GPHN_4:7:2325, XP_006515962.1, XP_006515963.1, XP_006515964.1, XP_006515965.1, XP_006515966.1, XP_006515967.1, XP_006515968.1 lcl|GPHN_38:8-2365_ORF1_GPHN_38:7:2364, XP_006515969.1 lcl|GPHN_3:8-2257_ORF1_GPHN_3:7:2256, XP_006515970.1 lcl|GPHN_1:8-2218_ORF1_GPHN_1:7:2217, XP_017170562.1, XP_017170563.1, XP_017170564.1, XP_017170565.1 lcl|GPHN_29:8-2323_ORF1_GPHN_…
IGHDIKRGECV	IGHDIKRGEC(+57.02)V	C10:Carbamidomethylation:1000.00	33.55	1282.65	0.9	642.33	14.47	NP_666077.2 lcl|GPHN_4:8-2326_ORF1_GPHN_4:7:2325, XP_006515962.1, XP_006515963.1, XP_006515964.1, XP_006515965.1, XP_006515966.1, XP_006515967.1, XP_006515968.1 lcl|GPHN_38:8-2365_ORF1_GPHN_38:7:2364, XP_006515969.1 lcl|GPHN_3:8-2257_ORF1_GPHN_3:7:2256, XP_006515970.1 lcl|GPHN_1:8-2218_ORF1_GPHN_1:7:2217, XP_017170562.1, XP_017170563.1, XP_017170564.1, XP_017170565.1 lcl|GPHN_29:8-2323_ORF1_GPHN_…
IGHDIKRGECVL	IGHDIKRGEC(+57.02)VL	C10:Carbamidomethylation:1000.00	37.57	1395.73	-0.3	698.872	17.66	NP_666077.2 lcl|GPHN_4:8-2326_ORF1_GPHN_4:7:2325, XP_006515962.1, XP_006515963.1, XP_006515964.1, XP_006515965.1, XP_006515966.1, XP_006515967.1, XP_006515968.1 lcl|GPHN_38:8-2365_ORF1_GPHN_38:7:2364, XP_006515969.1 lcl|GPHN_3:8-2257_ORF1_GPHN_3:7:2256, XP_006515970.1 lcl|GPHN_1:8-2218_ORF1_GPHN_1:7:2217, XP_017170562.1, XP_017170563.1, XP_017170564.1, XP_017170565.1 lcl|GPHN_29:8-2323_ORF1_GPHN_…
IIFALPGN	IIFALPGN		22.78	843.485	-0.8	422.75	33.55	NP_666077.2 lcl|GPHN_4:8-2326_ORF1_GPHN_4:7:2325, XP_006515962.1, XP_006515963.1, XP_006515964.1, XP_006515965.1, XP_006515966.1, XP_006515967.1, XP_006515968.1 lcl|GPHN_38:8-2365_ORF1_GPHN_38:7:2364, XP_006515969.1 lcl|GPHN_3:8-2257_ORF1_GPHN_3:7:2256, XP_006515970.1 lcl|GPHN_1:8-2218_ORF1_GPHN_1:7:2217, XP_017170562.1, XP_017170563.1, XP_017170564.1, XP_017170565.1 lcl|GPHN_29:8-2323_ORF1_GPHN_…
IIFALPGNP	I(+42.01)IFALPGNP	I1:Acetylation (Protein N-term):1000.00	28.96	982.549	-1.1	492.281	40.3	NP_666077.2 lcl|GPHN_4:8-2326_ORF1_GPHN_4:7:2325, XP_006515962.1, XP_006515963.1, XP_006515964.1, XP_006515965.1, XP_006515966.1, XP_006515967.1, XP_006515968.1 lcl|GPHN_38:8-2365_ORF1_GPHN_38:7:2364, XP_006515969.1 lcl|GPHN_3:8-2257_ORF1_GPHN_3:7:2256, XP_006515970.1 lcl|GPHN_1:8-2218_ORF1_GPHN_1:7:2217, XP_017170562.1, XP_017170563.1, XP_017170564.1, XP_017170565.1 lcl|GPHN_29:8-2323_ORF1_GPHN_…
IIFALPGNP	IIFALPGNP		21.9	940.538	-0.9	471.276	34.79	NP_666077.2 lcl|GPHN_4:8-2326_ORF1_GPHN_4:7:2325, XP_006515962.1, XP_006515963.1, XP_006515964.1, XP_006515965.1, XP_006515966.1, XP_006515967.1, XP_006515968.1 lcl|GPHN_38:8-2365_ORF1_GPHN_38:7:2364, XP_006515969.1 lcl|GPHN_3:8-2257_ORF1_GPHN_3:7:2256, XP_006515970.1 lcl|GPHN_1:8-2218_ORF1_GPHN_1:7:2217, XP_017170562.1, XP_017170563.1, XP_017170564.1, XP_017170565.1 lcl|GPHN_29:8-2323_ORF1_GPHN_…
IIFALPGNPVS	IIFALPGNPVS		30.64	1126.64	0.2	564.327	34.8	NP_666077.2 lcl|GPHN_4:8-2326_ORF1_GPHN_4:7:2325, XP_006515962.1, XP_006515963.1, XP_006515964.1, XP_006515965.1, XP_006515966.1, XP_006515967.1, XP_006515968.1 lcl|GPHN_38:8-2365_ORF1_GPHN_38:7:2364, XP_006515969.1 lcl|GPHN_3:8-2257_ORF1_GPHN_3:7:2256, XP_006515970.1 lcl|GPHN_1:8-2218_ORF1_GPHN_1:7:2217, XP_017170562.1, XP_017170563.1, XP_017170564.1, XP_017170565.1 lcl|GPHN_29:8-2323_ORF1_GPHN_…
IIFALPGNPVSA	IIFALPGNPVSA		32.84	1197.68	1.4	599.846	35.16	NP_666077.2 lcl|GPHN_4:8-2326_ORF1_GPHN_4:7:2325, XP_006515962.1, XP_006515963.1, XP_006515964.1, XP_006515965.1, XP_006515966.1, XP_006515967.1, XP_006515968.1 lcl|GPHN_38:8-2365_ORF1_GPHN_38:7:2364, XP_006515969.1 lcl|GPHN_3:8-2257_ORF1_GPHN_3:7:2256, XP_006515970.1 lcl|GPHN_1:8-2218_ORF1_GPHN_1:7:2217, XP_017170562.1, XP_017170563.1, XP_017170564.1, XP_017170565.1 lcl|GPHN_29:8-2323_ORF1_GPHN_…
IIFALPGNPVSAV	IIFALPGNPVSAV		32.81	1296.74	-0.1	649.379	36.75	NP_666077.2 lcl|GPHN_4:8-2326_ORF1_GPHN_4:7:2325, XP_006515962.1, XP_006515963.1, XP_006515964.1, XP_006515965.1, XP_006515966.1, XP_006515967.1, XP_006515968.1 lcl|GPHN_38:8-2365_ORF1_GPHN_38:7:2364, XP_006515969.1 lcl|GPHN_3:8-2257_ORF1_GPHN_3:7:2256, XP_006515970.1 lcl|GPHN_1:8-2218_ORF1_GPHN_1:7:2217, XP_017170562.1, XP_017170563.1, XP_017170564.1, XP_017170565.1 lcl|GPHN_29:8-2323_ORF1_GPHN_…
IIFALPGNPVSAVV	IIFALPGNPVSAVV		27.73	1395.81	0.8	698.914	38.36	NP_666077.2 lcl|GPHN_4:8-2326_ORF1_GPHN_4:7:2325, XP_006515962.1, XP_006515963.1, XP_006515964.1, XP_006515965.1, XP_006515966.1, XP_006515967.1, XP_006515968.1 lcl|GPHN_38:8-2365_ORF1_GPHN_38:7:2364, XP_006515969.1 lcl|GPHN_3:8-2257_ORF1_GPHN_3:7:2256, XP_006515970.1 lcl|GPHN_1:8-2218_ORF1_GPHN_1:7:2217, XP_017170562.1, XP_017170563.1, XP_017170564.1, XP_017170565.1 lcl|GPHN_29:8-2323_ORF1_GPHN_…
IIFALPGNPVSAVVT	IIFALPGNPVSAVVT		18.57	1496.86	0.1	749.438	37.61	NP_666077.2 lcl|GPHN_4:8-2326_ORF1_GPHN_4:7:2325, XP_006515962.1, XP_006515963.1, XP_006515964.1, XP_006515965.1, XP_006515966.1, XP_006515967.1, XP_006515968.1 lcl|GPHN_38:8-2365_ORF1_GPHN_38:7:2364, XP_006515969.1 lcl|GPHN_3:8-2257_ORF1_GPHN_3:7:2256, XP_006515970.1 lcl|GPHN_1:8-2218_ORF1_GPHN_1:7:2217, XP_017170562.1, XP_017170563.1, XP_017170564.1, XP_017170565.1 lcl|GPHN_29:8-2323_ORF1_GPHN_…
IIFALPGNPVSAVVTC	I(+42.01)IFALPGNPVSAVVTC(+57.02)	I1:Acetylation (Protein N-term):1000.00;C16:Carbamidomethylation:1000.00	32.14	1698.9	-0.7	850.457	40.77	NP_666077.2 lcl|GPHN_4:8-2326_ORF1_GPHN_4:7:2325, XP_006515962.1, XP_006515963.1, XP_006515964.1, XP_006515965.1, XP_006515966.1, XP_006515967.1, XP_006515968.1 lcl|GPHN_38:8-2365_ORF1_GPHN_38:7:2364, XP_006515969.1 lcl|GPHN_3:8-2257_ORF1_GPHN_3:7:2256, XP_006515970.1 lcl|GPHN_1:8-2218_ORF1_GPHN_1:7:2217, XP_017170562.1, XP_017170563.1, XP_017170564.1, XP_017170565.1 lcl|GPHN_29:8-2323_ORF1_GPHN_…
IIFALPGNPVSAVVTC	IIFALPGNPVSAVVTC(+57.02)	C16:Carbamidomethylation:1000.00	27.14	1656.89	0.9	829.453	38.21	NP_666077.2 lcl|GPHN_4:8-2326_ORF1_GPHN_4:7:2325, XP_006515962.1, XP_006515963.1, XP_006515964.1, XP_006515965.1, XP_006515966.1, XP_006515967.1, XP_006515968.1 lcl|GPHN_38:8-2365_ORF1_GPHN_38:7:2364, XP_006515969.1 lcl|GPHN_3:8-2257_ORF1_GPHN_3:7:2256, XP_006515970.1 lcl|GPHN_1:8-2218_ORF1_GPHN_1:7:2217, XP_017170562.1, XP_017170563.1, XP_017170564.1, XP_017170565.1 lcl|GPHN_29:8-2323_ORF1_GPHN_…
IIFALPGNPVSAVVTCN	IIFALPGNPVSAVVTC(+57.02)N	C16:Carbamidomethylation:1000.00	25.7	1770.93	-0.8	886.473	36.96	NP_666077.2 lcl|GPHN_4:8-2326_ORF1_GPHN_4:7:2325, XP_006515962.1, XP_006515963.1, XP_006515964.1, XP_006515965.1, XP_006515966.1, XP_006515967.1, XP_006515968.1 lcl|GPHN_38:8-2365_ORF1_GPHN_38:7:2364, XP_006515969.1 lcl|GPHN_3:8-2257_ORF1_GPHN_3:7:2256, XP_006515970.1 lcl|GPHN_1:8-2218_ORF1_GPHN_1:7:2217, XP_017170562.1, XP_017170563.1, XP_017170564.1, XP_017170565.1 lcl|GPHN_29:8-2323_ORF1_GPHN_…
IIFALPGNPVSAVVTCNL	IIFALPGNPVSAVVTC(+57.02)NL	C16:Carbamidomethylation:1000.00	35.64	1884.02	-0.7	943.015	39.11	NP_666077.2 lcl|GPHN_4:8-2326_ORF1_GPHN_4:7:2325, XP_006515962.1, XP_006515963.1, XP_006515964.1, XP_006515965.1, XP_006515966.1, XP_006515967.1, XP_006515968.1 lcl|GPHN_38:8-2365_ORF1_GPHN_38:7:2364, XP_006515969.1 lcl|GPHN_3:8-2257_ORF1_GPHN_3:7:2256, XP_006515970.1 lcl|GPHN_1:8-2218_ORF1_GPHN_1:7:2217, XP_017170562.1, XP_017170563.1, XP_017170564.1, XP_017170565.1 lcl|GPHN_29:8-2323_ORF1_GPHN_…
IIFALPGNPVSAVVTCNLF	IIFALPGNPVSAVVTC(+57.02)NLF	C16:Carbamidomethylation:1000.00	18.61	2031.09	0	1016.55	39.39	NP_666077.2 lcl|GPHN_4:8-2326_ORF1_GPHN_4:7:2325, XP_006515962.1, XP_006515963.1, XP_006515964.1, XP_006515965.1, XP_006515966.1, XP_006515967.1, XP_006515968.1 lcl|GPHN_38:8-2365_ORF1_GPHN_38:7:2364, XP_006515969.1 lcl|GPHN_3:8-2257_ORF1_GPHN_3:7:2256, XP_006515970.1 lcl|GPHN_1:8-2218_ORF1_GPHN_1:7:2217, XP_017170562.1, XP_017170563.1, XP_017170564.1, XP_017170565.1 lcl|GPHN_29:8-2323_ORF1_GPHN_…
IIFALPGNPVSAVVTCNLFVVPALR	IIFALPGNPVSAVVTC(+57.02)NLFVVPALR	C16:Carbamidomethylation:1000.00	54.82	2666.5	1	889.841	39.11	NP_666077.2 lcl|GPHN_4:8-2326_ORF1_GPHN_4:7:2325, XP_006515962.1, XP_006515963.1, XP_006515964.1, XP_006515965.1, XP_006515966.1, XP_006515967.1, XP_006515968.1 lcl|GPHN_38:8-2365_ORF1_GPHN_38:7:2364, XP_006515969.1 lcl|GPHN_3:8-2257_ORF1_GPHN_3:7:2256, XP_006515970.1 lcl|GPHN_1:8-2218_ORF1_GPHN_1:7:2217, XP_017170562.1, XP_017170563.1, XP_017170564.1, XP_017170565.1 lcl|GPHN_29:8-2323_ORF1_GPHN_…
IIGESQAGEQPTQ	IIGESQAGEQPTQ		30.93	1356.65	-1.6	679.332	20.69	NP_666077.2 lcl|GPHN_4:8-2326_ORF1_GPHN_4:7:2325, XP_006515962.1, XP_006515963.1, XP_006515964.1, XP_006515965.1, XP_006515966.1, XP_006515967.1, XP_006515968.1 lcl|GPHN_38:8-2365_ORF1_GPHN_38:7:2364, XP_006515969.1 lcl|GPHN_3:8-2257_ORF1_GPHN_3:7:2256, XP_006515970.1 lcl|GPHN_1:8-2218_ORF1_GPHN_1:7:2217, XP_017170562.1, XP_017170563.1, XP_017170564.1, XP_017170565.1 lcl|GPHN_29:8-2323_ORF1_GPHN_…
IIGESQAGEQPTQT	IIGESQAGEQPTQT		32.79	1457.7	2.3	729.859	21.04	NP_666077.2 lcl|GPHN_4:8-2326_ORF1_GPHN_4:7:2325, XP_006515962.1, XP_006515963.1, XP_006515964.1, XP_006515965.1, XP_006515966.1, XP_006515967.1, XP_006515968.1 lcl|GPHN_38:8-2365_ORF1_GPHN_38:7:2364, XP_006515969.1 lcl|GPHN_3:8-2257_ORF1_GPHN_3:7:2256, XP_006515970.1 lcl|GPHN_1:8-2218_ORF1_GPHN_1:7:2217, XP_017170562.1, XP_017170563.1, XP_017170564.1, XP_017170565.1 lcl|GPHN_29:8-2323_ORF1_GPHN_…
IIGESQAGEQPTQTVMPGQ	IIGESQAGEQPTQTVM(+15.99)PGQ	M16:Oxidation (M):1000.00	39.48	1985.94	-0.4	993.975	23.41	NP_666077.2 lcl|GPHN_4:8-2326_ORF1_GPHN_4:7:2325, XP_006515962.1, XP_006515963.1, XP_006515964.1, XP_006515965.1, XP_006515966.1, XP_006515967.1, XP_006515968.1 lcl|GPHN_38:8-2365_ORF1_GPHN_38:7:2364, XP_006515969.1 lcl|GPHN_3:8-2257_ORF1_GPHN_3:7:2256, XP_006515970.1 lcl|GPHN_1:8-2218_ORF1_GPHN_1:7:2217, XP_017170562.1, XP_017170563.1, XP_017170564.1, XP_017170565.1 lcl|GPHN_29:8-2323_ORF1_GPHN_…
IIGESQAGEQPTQTVMPGQV	IIGESQAGEQPTQTVM(+15.99)PGQV	M16:Oxidation (M):1000.00	21.13	2085	4.9	696.012	25.66	NP_666077.2 lcl|GPHN_4:8-2326_ORF1_GPHN_4:7:2325, XP_006515962.1, XP_006515963.1, XP_006515964.1, XP_006515965.1, XP_006515966.1, XP_006515967.1, XP_006515968.1 lcl|GPHN_38:8-2365_ORF1_GPHN_38:7:2364, XP_006515969.1 lcl|GPHN_3:8-2257_ORF1_GPHN_3:7:2256, XP_006515970.1 lcl|GPHN_1:8-2218_ORF1_GPHN_1:7:2217, XP_017170562.1, XP_017170563.1, XP_017170564.1, XP_017170565.1 lcl|GPHN_29:8-2323_ORF1_GPHN_…
IIGESQAGEQPTQTVMPGQVMR	IIGESQAGEQPTQTVM(+15.99)PGQVMR	M16:Oxidation (M):41.96	44.19	2372.15	-0.5	791.722	23.56	NP_666077.2 lcl|GPHN_4:8-2326_ORF1_GPHN_4:7:2325, XP_006515962.1, XP_006515963.1, XP_006515964.1, XP_006515965.1, XP_006515966.1, XP_006515967.1, XP_006515968.1 lcl|GPHN_38:8-2365_ORF1_GPHN_38:7:2364, XP_006515969.1 lcl|GPHN_3:8-2257_ORF1_GPHN_3:7:2256, XP_006515970.1 lcl|GPHN_1:8-2218_ORF1_GPHN_1:7:2217, XP_017170562.1, XP_017170563.1, XP_017170564.1, XP_017170565.1 lcl|GPHN_29:8-2323_ORF1_GPHN_…
IIGESQAGEQPTQTVMPGQVMR	IIGESQAGEQPTQTVM(+15.99)PGQVM(+15.99)R	M16:Oxidation (M):1000.00;M21:Oxidation (M):1000.00	42.69	2388.14	0.8	1195.08	21.68	NP_666077.2 lcl|GPHN_4:8-2326_ORF1_GPHN_4:7:2325, XP_006515962.1, XP_006515963.1, XP_006515964.1, XP_006515965.1, XP_006515966.1, XP_006515967.1, XP_006515968.1 lcl|GPHN_38:8-2365_ORF1_GPHN_38:7:2364, XP_006515969.1 lcl|GPHN_3:8-2257_ORF1_GPHN_3:7:2256, XP_006515970.1 lcl|GPHN_1:8-2218_ORF1_GPHN_1:7:2217, XP_017170562.1, XP_017170563.1, XP_017170564.1, XP_017170565.1 lcl|GPHN_29:8-2323_ORF1_GPHN_…
IIGESQAGEQPTQTVMPGQVMR	IIGESQAGEQPTQTVMPGQVM(+15.99)R	M21:Oxidation (M):5.94	23.14	2372.15	-1.9	791.721	23.77	NP_666077.2 lcl|GPHN_4:8-2326_ORF1_GPHN_4:7:2325, XP_006515962.1, XP_006515963.1, XP_006515964.1, XP_006515965.1, XP_006515966.1, XP_006515967.1, XP_006515968.1 lcl|GPHN_38:8-2365_ORF1_GPHN_38:7:2364, XP_006515969.1 lcl|GPHN_3:8-2257_ORF1_GPHN_3:7:2256, XP_006515970.1 lcl|GPHN_1:8-2218_ORF1_GPHN_1:7:2217, XP_017170562.1, XP_017170563.1, XP_017170564.1, XP_017170565.1 lcl|GPHN_29:8-2323_ORF1_GPHN_…
IINLPGSK	IINLPGSK		24.67	840.507	1	421.261	21.45	NP_666077.2 lcl|GPHN_4:8-2326_ORF1_GPHN_4:7:2325, XP_006515962.1, XP_006515963.1, XP_006515964.1, XP_006515965.1, XP_006515966.1, XP_006515967.1, XP_006515968.1 lcl|GPHN_38:8-2365_ORF1_GPHN_38:7:2364, XP_006515969.1 lcl|GPHN_3:8-2257_ORF1_GPHN_3:7:2256, XP_006515970.1 lcl|GPHN_1:8-2218_ORF1_GPHN_1:7:2217, XP_017170562.1, XP_017170563.1, XP_017170564.1, XP_017170565.1 lcl|GPHN_29:8-2323_ORF1_GPHN_…
IINLPGSKK	IINLPGSKK		23.71	968.602	-2.7	323.874	17.38	NP_666077.2 lcl|GPHN_4:8-2326_ORF1_GPHN_4:7:2325, XP_006515962.1, XP_006515963.1, XP_006515964.1, XP_006515965.1, XP_006515966.1, XP_006515967.1, XP_006515968.1 lcl|GPHN_38:8-2365_ORF1_GPHN_38:7:2364, XP_006515969.1 lcl|GPHN_3:8-2257_ORF1_GPHN_3:7:2256, XP_006515970.1 lcl|GPHN_1:8-2218_ORF1_GPHN_1:7:2217, XP_017170562.1, XP_017170563.1, XP_017170564.1, XP_017170565.1 lcl|GPHN_29:8-2323_ORF1_GPHN_…
IINLPGSKKG	IINLPGSKKG		21.84	1025.62	4	513.821	17.38	NP_666077.2 lcl|GPHN_4:8-2326_ORF1_GPHN_4:7:2325, XP_006515962.1, XP_006515963.1, XP_006515964.1, XP_006515965.1, XP_006515966.1, XP_006515967.1, XP_006515968.1 lcl|GPHN_38:8-2365_ORF1_GPHN_38:7:2364, XP_006515969.1 lcl|GPHN_3:8-2257_ORF1_GPHN_3:7:2256, XP_006515970.1 lcl|GPHN_1:8-2218_ORF1_GPHN_1:7:2217, XP_017170562.1, XP_017170563.1, XP_017170564.1, XP_017170565.1 lcl|GPHN_29:8-2323_ORF1_GPHN_…
IINLPGSKKGSQEC	I(+42.01)INLPGSKKGSQEC(+57.02)	I1:Acetylation (Protein N-term):1000.00;C14:Carbamidomethylation:1000.00	32.61	1571.8	1.1	524.94	25.41	NP_666077.2 lcl|GPHN_4:8-2326_ORF1_GPHN_4:7:2325, XP_006515962.1, XP_006515963.1, XP_006515964.1, XP_006515965.1, XP_006515966.1, XP_006515967.1, XP_006515968.1 lcl|GPHN_38:8-2365_ORF1_GPHN_38:7:2364, XP_006515969.1 lcl|GPHN_3:8-2257_ORF1_GPHN_3:7:2256, XP_006515970.1 lcl|GPHN_1:8-2218_ORF1_GPHN_1:7:2217, XP_017170562.1, XP_017170563.1, XP_017170564.1, XP_017170565.1 lcl|GPHN_29:8-2323_ORF1_GPHN_…
IINLPGSKKGSQEC	IINLPGSKKGSQEC(+57.02)	C14:Carbamidomethylation:1000.00	32.32	1529.79	1.2	765.902	18.01	NP_666077.2 lcl|GPHN_4:8-2326_ORF1_GPHN_4:7:2325, XP_006515962.1, XP_006515963.1, XP_006515964.1, XP_006515965.1, XP_006515966.1, XP_006515967.1, XP_006515968.1 lcl|GPHN_38:8-2365_ORF1_GPHN_38:7:2364, XP_006515969.1 lcl|GPHN_3:8-2257_ORF1_GPHN_3:7:2256, XP_006515970.1 lcl|GPHN_1:8-2218_ORF1_GPHN_1:7:2217, XP_017170562.1, XP_017170563.1, XP_017170564.1, XP_017170565.1 lcl|GPHN_29:8-2323_ORF1_GPHN_…
IINLPGSKKGSQECFQ	IINLPGSKKGSQEC(+57.02)FQ	C14:Carbamidomethylation:1000.00	19.62	1804.91	-0.5	602.645	21.13	NP_666077.2 lcl|GPHN_4:8-2326_ORF1_GPHN_4:7:2325, XP_006515962.1, XP_006515963.1, XP_006515964.1, XP_006515965.1, XP_006515966.1, XP_006515967.1, XP_006515968.1 lcl|GPHN_38:8-2365_ORF1_GPHN_38:7:2364, XP_006515969.1 lcl|GPHN_3:8-2257_ORF1_GPHN_3:7:2256, XP_006515970.1 lcl|GPHN_1:8-2218_ORF1_GPHN_1:7:2217, XP_017170562.1, XP_017170563.1, XP_017170564.1, XP_017170565.1 lcl|GPHN_29:8-2323_ORF1_GPHN_…
IINYRDG	IINYRDG		20.77	849.434	0	425.724	17.32	NP_666077.2 lcl|GPHN_4:8-2326_ORF1_GPHN_4:7:2325, XP_006515962.1, XP_006515963.1, XP_006515964.1, XP_006515965.1, XP_006515966.1, XP_006515967.1, XP_006515968.1 lcl|GPHN_38:8-2365_ORF1_GPHN_38:7:2364, XP_006515969.1 lcl|GPHN_3:8-2257_ORF1_GPHN_3:7:2256, XP_006515970.1 lcl|GPHN_1:8-2218_ORF1_GPHN_1:7:2217, XP_017170562.1, XP_017170563.1, XP_017170564.1, XP_017170565.1 lcl|GPHN_29:8-2323_ORF1_GPHN_…
IINYRDGMG	IINYRDGMG		33.37	1037.5	-0.8	519.755	20.63	NP_666077.2 lcl|GPHN_4:8-2326_ORF1_GPHN_4:7:2325, XP_006515962.1, XP_006515963.1, XP_006515964.1, XP_006515965.1, XP_006515966.1, XP_006515967.1, XP_006515968.1 lcl|GPHN_38:8-2365_ORF1_GPHN_38:7:2364, XP_006515969.1 lcl|GPHN_3:8-2257_ORF1_GPHN_3:7:2256, XP_006515970.1 lcl|GPHN_1:8-2218_ORF1_GPHN_1:7:2217, XP_017170562.1, XP_017170563.1, XP_017170564.1, XP_017170565.1 lcl|GPHN_29:8-2323_ORF1_GPHN_…
IINYRDGMGR	IINYRDGMGR		27.85	1193.6	-1.7	398.872	18.17	NP_666077.2 lcl|GPHN_4:8-2326_ORF1_GPHN_4:7:2325, XP_006515962.1, XP_006515963.1, XP_006515964.1, XP_006515965.1, XP_006515966.1, XP_006515967.1, XP_006515968.1 lcl|GPHN_38:8-2365_ORF1_GPHN_38:7:2364, XP_006515969.1 lcl|GPHN_3:8-2257_ORF1_GPHN_3:7:2256, XP_006515970.1 lcl|GPHN_1:8-2218_ORF1_GPHN_1:7:2217, XP_017170562.1, XP_017170563.1, XP_017170564.1, XP_017170565.1 lcl|GPHN_29:8-2323_ORF1_GPHN_…
IINYRDGMGR	IINYRDGM(+15.99)GR	M8:Oxidation (M):1000.00	25.85	1209.59	-0.3	605.803	15.64	NP_666077.2 lcl|GPHN_4:8-2326_ORF1_GPHN_4:7:2325, XP_006515962.1, XP_006515963.1, XP_006515964.1, XP_006515965.1, XP_006515966.1, XP_006515967.1, XP_006515968.1 lcl|GPHN_38:8-2365_ORF1_GPHN_38:7:2364, XP_006515969.1 lcl|GPHN_3:8-2257_ORF1_GPHN_3:7:2256, XP_006515970.1 lcl|GPHN_1:8-2218_ORF1_GPHN_1:7:2217, XP_017170562.1, XP_017170563.1, XP_017170564.1, XP_017170565.1 lcl|GPHN_29:8-2323_ORF1_GPHN_…
IINYRDGMGRV	IINYRDGMGRV		35.51	1292.67	-0.6	647.34	20.53	NP_666077.2 lcl|GPHN_4:8-2326_ORF1_GPHN_4:7:2325, XP_006515962.1, XP_006515963.1, XP_006515964.1, XP_006515965.1, XP_006515966.1, XP_006515967.1, XP_006515968.1 lcl|GPHN_38:8-2365_ORF1_GPHN_38:7:2364, XP_006515969.1 lcl|GPHN_3:8-2257_ORF1_GPHN_3:7:2256, XP_006515970.1 lcl|GPHN_1:8-2218_ORF1_GPHN_1:7:2217, XP_017170562.1, XP_017170563.1, XP_017170564.1, XP_017170565.1 lcl|GPHN_29:8-2323_ORF1_GPHN_…
IINYRDGMGRV	IINYRDGM(+15.99)GRV	M8:Oxidation (M):1000.00	21.95	1308.66	0.9	655.338	17.54	NP_666077.2 lcl|GPHN_4:8-2326_ORF1_GPHN_4:7:2325, XP_006515962.1, XP_006515963.1, XP_006515964.1, XP_006515965.1, XP_006515966.1, XP_006515967.1, XP_006515968.1 lcl|GPHN_38:8-2365_ORF1_GPHN_38:7:2364, XP_006515969.1 lcl|GPHN_3:8-2257_ORF1_GPHN_3:7:2256, XP_006515970.1 lcl|GPHN_1:8-2218_ORF1_GPHN_1:7:2217, XP_017170562.1, XP_017170563.1, XP_017170564.1, XP_017170565.1 lcl|GPHN_29:8-2323_ORF1_GPHN_…
IISRGVQVLPRDTAS	IISRGVQVLPRDTAS		35.85	1610.91	-0.2	537.977	20.51	NP_666077.2 lcl|GPHN_4:8-2326_ORF1_GPHN_4:7:2325, XP_006515962.1, XP_006515963.1, XP_006515964.1, XP_006515965.1, XP_006515966.1, XP_006515967.1, XP_006515968.1 lcl|GPHN_38:8-2365_ORF1_GPHN_38:7:2364, XP_006515969.1 lcl|GPHN_3:8-2257_ORF1_GPHN_3:7:2256, XP_006515970.1 lcl|GPHN_1:8-2218_ORF1_GPHN_1:7:2217, XP_017170562.1, XP_017170563.1, XP_017170564.1, XP_017170565.1 lcl|GPHN_29:8-2323_ORF1_GPHN_…
IITSGGVSMGEKDY	IITSGGVSMGEKDY		36.16	1455.69	0.5	728.853	22.89	NP_666077.2 lcl|GPHN_4:8-2326_ORF1_GPHN_4:7:2325, XP_006515962.1, XP_006515963.1, XP_006515964.1, XP_006515965.1, XP_006515966.1, XP_006515967.1, XP_006515968.1 lcl|GPHN_38:8-2365_ORF1_GPHN_38:7:2364, XP_006515969.1 lcl|GPHN_3:8-2257_ORF1_GPHN_3:7:2256, XP_006515970.1 lcl|GPHN_1:8-2218_ORF1_GPHN_1:7:2217, XP_017170562.1, XP_017170563.1, XP_017170564.1, XP_017170565.1 lcl|GPHN_29:8-2323_ORF1_GPHN_…
IITSGGVSMGEKDY	IITSGGVSM(+15.99)GEKDY	M9:Oxidation (M):1000.00	34.68	1471.69	0.1	736.851	20.15	NP_666077.2 lcl|GPHN_4:8-2326_ORF1_GPHN_4:7:2325, XP_006515962.1, XP_006515963.1, XP_006515964.1, XP_006515965.1, XP_006515966.1, XP_006515967.1, XP_006515968.1 lcl|GPHN_38:8-2365_ORF1_GPHN_38:7:2364, XP_006515969.1 lcl|GPHN_3:8-2257_ORF1_GPHN_3:7:2256, XP_006515970.1 lcl|GPHN_1:8-2218_ORF1_GPHN_1:7:2217, XP_017170562.1, XP_017170563.1, XP_017170564.1, XP_017170565.1 lcl|GPHN_29:8-2323_ORF1_GPHN_…
IITSGGVSMGEKDYLKQ	IITSGGVSM(+15.99)GEKDYLKQ	M9:Oxidation (M):1000.00	38.35	1840.92	0.4	614.649	20.71	NP_666077.2 lcl|GPHN_4:8-2326_ORF1_GPHN_4:7:2325, XP_006515962.1, XP_006515963.1, XP_006515964.1, XP_006515965.1, XP_006515966.1, XP_006515967.1, XP_006515968.1 lcl|GPHN_38:8-2365_ORF1_GPHN_38:7:2364, XP_006515969.1 lcl|GPHN_3:8-2257_ORF1_GPHN_3:7:2256, XP_006515970.1 lcl|GPHN_1:8-2218_ORF1_GPHN_1:7:2217, XP_017170562.1, XP_017170563.1, XP_017170564.1, XP_017170565.1 lcl|GPHN_29:8-2323_ORF1_GPHN_…
IKRGECVL	IKRGEC(+57.02)VL	C6:Carbamidomethylation:1000.00	22.88	973.538	2	487.777	15.77	NP_666077.2 lcl|GPHN_4:8-2326_ORF1_GPHN_4:7:2325, XP_006515962.1, XP_006515963.1, XP_006515964.1, XP_006515965.1, XP_006515966.1, XP_006515967.1, XP_006515968.1 lcl|GPHN_38:8-2365_ORF1_GPHN_38:7:2364, XP_006515969.1 lcl|GPHN_3:8-2257_ORF1_GPHN_3:7:2256, XP_006515970.1 lcl|GPHN_1:8-2218_ORF1_GPHN_1:7:2217, XP_017170562.1, XP_017170563.1, XP_017170564.1, XP_017170565.1 lcl|GPHN_29:8-2323_ORF1_GPHN_…
ILDPRPT	ILDPRPT		18.77	810.46	0	406.237	21.86	NP_666077.2 lcl|GPHN_4:8-2326_ORF1_GPHN_4:7:2325, XP_006515962.1, XP_006515963.1, XP_006515964.1, XP_006515965.1, XP_006515966.1, XP_006515967.1, XP_006515968.1 lcl|GPHN_38:8-2365_ORF1_GPHN_38:7:2364, XP_006515969.1 lcl|GPHN_3:8-2257_ORF1_GPHN_3:7:2256, XP_006515970.1 lcl|GPHN_1:8-2218_ORF1_GPHN_1:7:2217, XP_017170562.1, XP_017170563.1, XP_017170564.1, XP_017170565.1 lcl|GPHN_29:8-2323_ORF1_GPHN_…
ILDPRPTIIK	ILDPRPTIIK		26.69	1164.72	-0.2	583.369	21.97	NP_666077.2 lcl|GPHN_4:8-2326_ORF1_GPHN_4:7:2325, XP_006515962.1, XP_006515963.1, XP_006515964.1, XP_006515965.1, XP_006515966.1, XP_006515967.1, XP_006515968.1 lcl|GPHN_38:8-2365_ORF1_GPHN_38:7:2364, XP_006515969.1 lcl|GPHN_3:8-2257_ORF1_GPHN_3:7:2256, XP_006515970.1 lcl|GPHN_1:8-2218_ORF1_GPHN_1:7:2217, XP_017170562.1, XP_017170563.1, XP_017170564.1, XP_017170565.1 lcl|GPHN_29:8-2323_ORF1_GPHN_…
ILPALPH	ILPALPH		22.14	759.464	-1.3	380.739	24.48	NP_666077.2 lcl|GPHN_4:8-2326_ORF1_GPHN_4:7:2325, XP_006515962.1, XP_006515963.1, XP_006515964.1, XP_006515965.1, XP_006515966.1, XP_006515967.1, XP_006515968.1 lcl|GPHN_38:8-2365_ORF1_GPHN_38:7:2364, XP_006515969.1 lcl|GPHN_3:8-2257_ORF1_GPHN_3:7:2256, XP_006515970.1 lcl|GPHN_1:8-2218_ORF1_GPHN_1:7:2217, XP_017170562.1, XP_017170563.1, XP_017170564.1, XP_017170565.1 lcl|GPHN_29:8-2323_ORF1_GPHN_…
ILPALPHA	ILPALPHA		36.75	830.501	-0.8	416.258	26.99	NP_666077.2 lcl|GPHN_4:8-2326_ORF1_GPHN_4:7:2325, XP_006515962.1, XP_006515963.1, XP_006515964.1, XP_006515965.1, XP_006515966.1, XP_006515967.1, XP_006515968.1 lcl|GPHN_38:8-2365_ORF1_GPHN_38:7:2364, XP_006515969.1 lcl|GPHN_3:8-2257_ORF1_GPHN_3:7:2256, XP_006515970.1 lcl|GPHN_1:8-2218_ORF1_GPHN_1:7:2217, XP_017170562.1, XP_017170563.1, XP_017170564.1, XP_017170565.1 lcl|GPHN_29:8-2323_ORF1_GPHN_…
ILPALPHA	I(+42.01)LPALPHA	I1:Acetylation (Protein N-term):1000.00	34.31	872.512	-0.8	437.263	35.62	NP_666077.2 lcl|GPHN_4:8-2326_ORF1_GPHN_4:7:2325, XP_006515962.1, XP_006515963.1, XP_006515964.1, XP_006515965.1, XP_006515966.1, XP_006515967.1, XP_006515968.1 lcl|GPHN_38:8-2365_ORF1_GPHN_38:7:2364, XP_006515969.1 lcl|GPHN_3:8-2257_ORF1_GPHN_3:7:2256, XP_006515970.1 lcl|GPHN_1:8-2218_ORF1_GPHN_1:7:2217, XP_017170562.1, XP_017170563.1, XP_017170564.1, XP_017170565.1 lcl|GPHN_29:8-2323_ORF1_GPHN_…
ILPALPHAIDL	ILPALPHAIDL		29.52	1171.7	0.4	586.856	31.27	NP_666077.2 lcl|GPHN_4:8-2326_ORF1_GPHN_4:7:2325, XP_006515962.1, XP_006515963.1, XP_006515964.1, XP_006515965.1, XP_006515966.1, XP_006515967.1, XP_006515968.1 lcl|GPHN_38:8-2365_ORF1_GPHN_38:7:2364, XP_006515969.1 lcl|GPHN_3:8-2257_ORF1_GPHN_3:7:2256, XP_006515970.1 lcl|GPHN_1:8-2218_ORF1_GPHN_1:7:2217, XP_017170562.1, XP_017170563.1, XP_017170564.1, XP_017170565.1 lcl|GPHN_29:8-2323_ORF1_GPHN_…
ILPALPHAIDLLR	ILPALPHAIDLLR		41.97	1440.88	0.4	721.448	30.31	NP_666077.2 lcl|GPHN_4:8-2326_ORF1_GPHN_4:7:2325, XP_006515962.1, XP_006515963.1, XP_006515964.1, XP_006515965.1, XP_006515966.1, XP_006515967.1, XP_006515968.1 lcl|GPHN_38:8-2365_ORF1_GPHN_38:7:2364, XP_006515969.1 lcl|GPHN_3:8-2257_ORF1_GPHN_3:7:2256, XP_006515970.1 lcl|GPHN_1:8-2218_ORF1_GPHN_1:7:2217, XP_017170562.1, XP_017170563.1, XP_017170564.1, XP_017170565.1 lcl|GPHN_29:8-2323_ORF1_GPHN_…
ILRASHSAVD	ILRASHSAVD		25.31	1067.57	-0.1	534.793	14.34	NP_666077.2 lcl|GPHN_4:8-2326_ORF1_GPHN_4:7:2325, XP_006515962.1, XP_006515963.1, XP_006515964.1, XP_006515965.1, XP_006515966.1, XP_006515967.1, XP_006515968.1 lcl|GPHN_38:8-2365_ORF1_GPHN_38:7:2364, XP_006515969.1 lcl|GPHN_3:8-2257_ORF1_GPHN_3:7:2256, XP_006515970.1 lcl|GPHN_1:8-2218_ORF1_GPHN_1:7:2217, XP_017170562.1, XP_017170563.1, XP_017170564.1, XP_017170565.1 lcl|GPHN_29:8-2323_ORF1_GPHN_…
ILTNHDHQIR	ILTNHDHQIR		30.56	1245.66	-1	416.226	14.16	NP_666077.2 lcl|GPHN_4:8-2326_ORF1_GPHN_4:7:2325, XP_006515962.1, XP_006515963.1, XP_006515964.1, XP_006515965.1, XP_006515966.1, XP_006515967.1, XP_006515968.1 lcl|GPHN_38:8-2365_ORF1_GPHN_38:7:2364, XP_006515969.1 lcl|GPHN_3:8-2257_ORF1_GPHN_3:7:2256, XP_006515970.1 lcl|GPHN_1:8-2218_ORF1_GPHN_1:7:2217, XP_017170562.1, XP_017170563.1, XP_017170564.1, XP_017170565.1 lcl|GPHN_29:8-2323_ORF1_GPHN_…
ILTNHDHQIRVG	ILTNHDHQIRVG		35.62	1401.75	-1	468.256	16.68	NP_666077.2 lcl|GPHN_4:8-2326_ORF1_GPHN_4:7:2325, XP_006515962.1, XP_006515963.1, XP_006515964.1, XP_006515965.1, XP_006515966.1, XP_006515967.1, XP_006515968.1 lcl|GPHN_38:8-2365_ORF1_GPHN_38:7:2364, XP_006515969.1 lcl|GPHN_3:8-2257_ORF1_GPHN_3:7:2256, XP_006515970.1 lcl|GPHN_1:8-2218_ORF1_GPHN_1:7:2217, XP_017170562.1, XP_017170563.1, XP_017170564.1, XP_017170565.1 lcl|GPHN_29:8-2323_ORF1_GPHN_…
ILTWHHQEPLP	ILTWHHQEPLP		24.44	1369.71	0.1	685.864	23.28	NP_666077.2 lcl|GPHN_4:8-2326_ORF1_GPHN_4:7:2325, XP_006515962.1, XP_006515963.1, XP_006515964.1, XP_006515965.1, XP_006515966.1, XP_006515967.1, XP_006515968.1 lcl|GPHN_38:8-2365_ORF1_GPHN_38:7:2364, XP_006515969.1 lcl|GPHN_3:8-2257_ORF1_GPHN_3:7:2256, XP_006515970.1 lcl|GPHN_1:8-2218_ORF1_GPHN_1:7:2217, XP_017170562.1, XP_017170563.1, XP_017170564.1, XP_017170565.1 lcl|GPHN_29:8-2323_ORF1_GPHN_…
ILTWHHQEPLPW	ILTWHHQEPLPW		32.75	1555.79	-0.4	519.605	27.89	NP_666077.2 lcl|GPHN_4:8-2326_ORF1_GPHN_4:7:2325, XP_006515962.1, XP_006515963.1, XP_006515964.1, XP_006515965.1, XP_006515966.1, XP_006515967.1, XP_006515968.1 lcl|GPHN_38:8-2365_ORF1_GPHN_38:7:2364, XP_006515969.1 lcl|GPHN_3:8-2257_ORF1_GPHN_3:7:2256, XP_006515970.1 lcl|GPHN_1:8-2218_ORF1_GPHN_1:7:2217, XP_017170562.1, XP_017170563.1, XP_017170564.1, XP_017170565.1 lcl|GPHN_29:8-2323_ORF1_GPHN_…
ILTWHHQEPLPWAQ	ILTWHHQEPLPWAQ		39.65	1754.89	-0.2	878.452	27.44	NP_666077.2 lcl|GPHN_4:8-2326_ORF1_GPHN_4:7:2325, XP_006515962.1, XP_006515963.1, XP_006515964.1, XP_006515965.1, XP_006515966.1, XP_006515967.1, XP_006515968.1 lcl|GPHN_38:8-2365_ORF1_GPHN_38:7:2364, XP_006515969.1 lcl|GPHN_3:8-2257_ORF1_GPHN_3:7:2256, XP_006515970.1 lcl|GPHN_1:8-2218_ORF1_GPHN_1:7:2217, XP_017170562.1, XP_017170563.1, XP_017170564.1, XP_017170565.1 lcl|GPHN_29:8-2323_ORF1_GPHN_…
ILTWHHQEPLPWAQS	ILTWHHQEPLPWAQS		40.22	1841.92	0.9	614.982	27.25	NP_666077.2 lcl|GPHN_4:8-2326_ORF1_GPHN_4:7:2325, XP_006515962.1, XP_006515963.1, XP_006515964.1, XP_006515965.1, XP_006515966.1, XP_006515967.1, XP_006515968.1 lcl|GPHN_38:8-2365_ORF1_GPHN_38:7:2364, XP_006515969.1 lcl|GPHN_3:8-2257_ORF1_GPHN_3:7:2256, XP_006515970.1 lcl|GPHN_1:8-2218_ORF1_GPHN_1:7:2217, XP_017170562.1, XP_017170563.1, XP_017170564.1, XP_017170565.1 lcl|GPHN_29:8-2323_ORF1_GPHN_…
ILTWHHQEPLPWAQST	ILTWHHQEPLPWAQST		38.72	1942.97	0	648.664	27.25	NP_666077.2 lcl|GPHN_4:8-2326_ORF1_GPHN_4:7:2325, XP_006515962.1, XP_006515963.1, XP_006515964.1, XP_006515965.1, XP_006515966.1, XP_006515967.1, XP_006515968.1 lcl|GPHN_38:8-2365_ORF1_GPHN_38:7:2364, XP_006515969.1 lcl|GPHN_3:8-2257_ORF1_GPHN_3:7:2256, XP_006515970.1 lcl|GPHN_1:8-2218_ORF1_GPHN_1:7:2217, XP_017170562.1, XP_017170563.1, XP_017170564.1, XP_017170565.1 lcl|GPHN_29:8-2323_ORF1_GPHN_…
[truncated: 1,619 more rows]

## Sheet: Peptides matching new isoforms
			GPHN_ isoforms	Peptides	Exon or Exon junction	features
			GPHN_ 29, GPHN_58, GPHN_93, GPHN_98, GPHN_109, GPHN_123, GPHN_162, GPHN_198, GPHN_200, GPHN_252, GPHN_256,	ARLPSCSSTYSVSELHSR LPSCSSTYSVSELHSR SCSSTYSVSELHSR STYSVSEL	Exon 21 and EEJ:21-24	new junction
[truncated: 23 more rows]
